# Supplementary material for: Impact of natural selection on global patterns of genetic variation, and association with clinical phenotypes, at genes involved in SARS-CoV-2 infection
Source: Res Sq. 2021 Jul 27:rs.3.rs-673011. Preprint. [Version 1] doi: 10.21203/rs.3.rs-673011/v1 (PMC8328070; doi:10.21203/rs.3.rs-673011/v1)
Supplement: Supplement 1 [file 6d3b84f81e2d67c24eb840f5.xlsx]

## Sheet: Sheet1
	PMBB		Table: Penn Medicine Biobank (PMBB) participant characteristics
	(N=15,977)
Sex - number (%)
Female	8379 (52%)
Male	7598 (48%)
Age - years
Mean	62.7 (±17.2)
Range	19 - 89
Race
Black (African Americans)	8916
White (European Americans)	7061
