# Supplementary material for: Impact of natural selection on global patterns of genetic variation, and association with clinical phenotypes, at genes involved in SARS-CoV-2 infection
Source: Res Sq. 2021 Jul 27:rs.3.rs-673011. Preprint. [Version 1] doi: 10.21203/rs.3.rs-673011/v1 (PMC8328070; doi:10.21203/rs.3.rs-673011/v1)
Supplement: Supplement 2 [file 2377336ce1ba570729e0278e.xlsx]

## Sheet: ACE2
chrom	position	rsid	ref	alt	ancestor	minor_allele	maf_all	missing_rate	EAS	EUR	AFR	AMR	SAS	AFR_TopMed_1KG	Kenya.Nilo-Saharan	Cameroon.NigerKordofanian	Tanzania.Afroasiatic	Kenya.Afroasiatic	Botswana.Khoesan	Botswana.Niger-Kordofanian	Ethiopia.Afroasiatic	Cameroon.Pygmy	Ethiopia.Niolo-Saharan	Tanzania.Hadzabe	Cameroon.Fulani	Tanzania.Sandawe	Ethiopia.Sabue	info	CLIN_SIG	Condel	CADD_PHRED	LoFtool	SIFT	PolyPhen
X	15300008	rs193112874	G	A	G	A	0.0002649	0.513692	0.0013089	0	0	0	0	0	N	N	N	N	N	N	N	N	N	N	N	N	N	CSQ=A|intron_variant|MODIFIER|ASB11|ENSG00000165192|Transcript|ENST00000344384.8|protein_coding||2/6||||||||rs193112874||-1||HGNC|HGNC:17186||5|A1|||0.0003|0|0|0.0013|0|0||||||||||||||||||2.401|0.065598|0.868|,A|intron_variant|MODIFIER|ASB11|ENSG00000165192|Transcript|ENST00000380470.7|protein_coding||2/6||||||||rs193112874||-1||HGNC|HGNC:17186||1||||0.0003|0|0|0.0013|0|0||||||||||||||||||2.401|0…	N	N	2.401	0.868	N	N
X	15300018	.	T	G	T	G	0.00048216	0.486308	N	N	N	N	N	0.000625	0	0	0	0.0185185	0	0	0.0013624	0	0	0	0	0	0	CSQ=G|intron_variant|MODIFIER|ASB11|ENSG00000165192|Transcript|ENST00000344384.8|protein_coding||2/6||||||||||-1||HGNC|HGNC:17186||5|A1||||||||||||||||||||||||||5.926|0.356360|0.868|,G|intron_variant|MODIFIER|ASB11|ENSG00000165192|Transcript|ENST00000380470.7|protein_coding||2/6||||||||||-1||HGNC|HGNC:17186||1|||||||||||||||||||||||||||5.926|0.356360|0.868|,G|intron_variant|MODIFIER|ASB11|ENSG000…	N	N	5.926	0.868	N	N
X	15300158	.	G	GA	G	GA	0.0002649	0.513692	0.0013089	0	0	0	0	0	N	N	N	N	N	N	N	N	N	N	N	N	N	CSQ=A|intron_variant|MODIFIER|ASB11|ENSG00000165192|Transcript|ENST00000344384.8|protein_coding||2/6||||||||rs778810047||-1||HGNC|HGNC:17186||5|A1||||||||||||||||||||||||||||0.868|,A|intron_variant|MODIFIER|ASB11|ENSG00000165192|Transcript|ENST00000380470.7|protein_coding||2/6||||||||rs778810047||-1||HGNC|HGNC:17186||1|||||||||||||||||||||||||||||0.868|,A|intron_variant|MODIFIER|ASB11|ENSG0000016…	N	N	N	0.868	N	N
X	15300195	rs140293526	A	C	A	C	0.0122428	0	0	0	0.0279163	0.00572519	0	0.019034	0.00414938	0.0610465	0.0522876	0	0.00826446	0.0853658	0.0027248	0.00639659	0	0.00948767	0.0125523	0.00689655	0	CSQ=C|intron_variant|MODIFIER|ASB11|ENSG00000165192|Transcript|ENST00000344384.8|protein_coding||2/6||||||||rs140293526||-1||HGNC|HGNC:17186||5|A1|||0.0082|0.0279|0.0057|0|0|0||||||||||||||||||2.063|0.033041|0.868|,C|intron_variant|MODIFIER|ASB11|ENSG00000165192|Transcript|ENST00000380470.7|protein_coding||2/6||||||||rs140293526||-1||HGNC|HGNC:17186||1||||0.0082|0.0279|0.0057|0|0|0|||||||||||||||…	N	N	2.063	0.868	N	N
X	15300243	rs5935937	G	A	A	A	0.395052	0	0.431937	0.406005	0.366899	0.29771	0.625348	0.357126	0.373444	0.27907	0.431373	0.296296	0.380165	0.304878	0.408719	0.236674	0.552632	0.258065	0.560669	0.413793	0.603774	CSQ=A|intron_variant|MODIFIER|ASB11|ENSG00000165192|Transcript|ENST00000344384.8|protein_coding||2/6||||||||rs5935937||-1||HGNC|HGNC:17186||5|A1|||0.4276|0.3669|0.2977|0.4319|0.406|0.6253||||||||||||||||||1.960|0.022489|0.868|,A|intron_variant|MODIFIER|ASB11|ENSG00000165192|Transcript|ENST00000380470.7|protein_coding||2/6||||||||rs5935937||-1||HGNC|HGNC:17186||1||||0.4276|0.3669|0.2977|0.4319|0.4…	N	N	1.96	0.868	N	N
X	15300244	.	G	A	G	A	0.00238411	0.513692	0	0	0	0	0.0125348	0	N	N	N	N	N	N	N	N	N	N	N	N	N	CSQ=A|intron_variant|MODIFIER|ASB11|ENSG00000165192|Transcript|ENST00000344384.8|protein_coding||2/6||||||||rs777516021||-1||HGNC|HGNC:17186||5|A1|||0.0024|||||||||||||||||||||||2.011|0.027673|0.868|,A|intron_variant|MODIFIER|ASB11|ENSG00000165192|Transcript|ENST00000380470.7|protein_coding||2/6||||||||rs777516021||-1||HGNC|HGNC:17186||1||||0.0024|||||||||||||||||||||||2.011|0.027673|0.868|,A|int…	N	N	2.011	0.868	N	N
X	15300245	.	A	T	A	T	0.00144648	0.486308	N	N	N	N	N	0.0015625	0	0.00581395	0	0	0	0	0.00408719	0	0	0	0	0	0	CSQ=T|intron_variant|MODIFIER|ASB11|ENSG00000165192|Transcript|ENST00000344384.8|protein_coding||2/6||||||||rs1447478382||-1||HGNC|HGNC:17186||5|A1||||||||||||||||||||||||||5.150|0.287231|0.868|,T|intron_variant|MODIFIER|ASB11|ENSG00000165192|Transcript|ENST00000380470.7|protein_coding||2/6||||||||rs1447478382||-1||HGNC|HGNC:17186||1|||||||||||||||||||||||||||5.150|0.287231|0.868|,T|intron_varian…	N	N	5.15	0.868	N	N
X	15300359	.	G	A	G	A	0.00238411	0.513692	0	0	0	0	0.0125348	0	N	N	N	N	N	N	N	N	N	N	N	N	N	CSQ=A|intron_variant|MODIFIER|ASB11|ENSG00000165192|Transcript|ENST00000344384.8|protein_coding||2/6||||||||rs746597040||-1||HGNC|HGNC:17186||5|A1|||0.0024|||||||||||||||||||||||6.303|0.392482|0.868|,A|intron_variant|MODIFIER|ASB11|ENSG00000165192|Transcript|ENST00000380470.7|protein_coding||2/6||||||||rs746597040||-1||HGNC|HGNC:17186||1||||0.0024|||||||||||||||||||||||6.303|0.392482|0.868|,A|int…	N	N	6.303	0.868	N	N
X	15300391	rs202017413	G	T	G	T	0.0002649	0.513692	0.0013089	0	0	0	0	0	N	N	N	N	N	N	N	N	N	N	N	N	N	CSQ=T|intron_variant|MODIFIER|ASB11|ENSG00000165192|Transcript|ENST00000344384.8|protein_coding||2/6||||||||rs202017413||-1||HGNC|HGNC:17186||5|A1|||0.0003|0|0|0.0013|0|0||||||||||||||||||2.373|0.062946|0.868|,T|intron_variant|MODIFIER|ASB11|ENSG00000165192|Transcript|ENST00000380470.7|protein_coding||2/6||||||||rs202017413||-1||HGNC|HGNC:17186||1||||0.0003|0|0|0.0013|0|0||||||||||||||||||2.373|0…	N	N	2.373	0.868	N	N
X	15300404	.	C	T	C	T	0.0005298	0.513692	0.0026178	0	0	0	0	0	N	N	N	N	N	N	N	N	N	N	N	N	N	CSQ=T|intron_variant|MODIFIER|ASB11|ENSG00000165192|Transcript|ENST00000344384.8|protein_coding||2/6||||||||rs776035305||-1||HGNC|HGNC:17186||5|A1|||0.0005|||||||||||||||||||||||0.373|-0.252695|0.868|,T|intron_variant|MODIFIER|ASB11|ENSG00000165192|Transcript|ENST00000380470.7|protein_coding||2/6||||||||rs776035305||-1||HGNC|HGNC:17186||1||||0.0005|||||||||||||||||||||||0.373|-0.252695|0.868|,T|i…	N	N	0.373	0.868	N	N
X	15300410	.	A	G	A	G	0.0005298	0.513692	0	0	0.00199402	0	0	0.00199402	N	N	N	N	N	N	N	N	N	N	N	N	N	CSQ=G|intron_variant|MODIFIER|ASB11|ENSG00000165192|Transcript|ENST00000344384.8|protein_coding||2/6||||||||rs749661734||-1||HGNC|HGNC:17186||5|A1|||0.0005|||||||||||||||||||||||1.486|-0.031089|0.868|,G|intron_variant|MODIFIER|ASB11|ENSG00000165192|Transcript|ENST00000380470.7|protein_coding||2/6||||||||rs749661734||-1||HGNC|HGNC:17186||1||||0.0005|||||||||||||||||||||||1.486|-0.031089|0.868|,G|i…	N	N	1.486	0.868	N	N
X	15300437	.	T	A	T	A	0.00024108	0.486308	N	N	N	N	N	0.0003125	0	0	0	0	0	0	0	0	0.0263158	0	0	0	0	CSQ=A|intron_variant|MODIFIER|ASB11|ENSG00000165192|Transcript|ENST00000344384.8|protein_coding||2/6||||||||||-1||HGNC|HGNC:17186||5|A1||||||||||||||||||||||||||3.817|0.181152|0.868|,A|intron_variant|MODIFIER|ASB11|ENSG00000165192|Transcript|ENST00000380470.7|protein_coding||2/6||||||||||-1||HGNC|HGNC:17186||1|||||||||||||||||||||||||||3.817|0.181152|0.868|,A|intron_variant|MODIFIER|ASB11|ENSG000…	N	N	3.817	0.868	N	N
X	15300469	.	C	A	C	A	0.0002649	0.513692	0.0013089	0	0	0	0	0	N	N	N	N	N	N	N	N	N	N	N	N	N	CSQ=A|intron_variant|MODIFIER|ASB11|ENSG00000165192|Transcript|ENST00000344384.8|protein_coding||2/6||||||||rs769340838||-1||HGNC|HGNC:17186||5|A1|||0.0003|||||||||||||||||||||||1.448|-0.035813|0.868|,A|intron_variant|MODIFIER|ASB11|ENSG00000165192|Transcript|ENST00000380470.7|protein_coding||2/6||||||||rs769340838||-1||HGNC|HGNC:17186||1||||0.0003|||||||||||||||||||||||1.448|-0.035813|0.868|,A|i…	N	N	1.448	0.868	N	N
X	15300479	.	T	A	T	A	0.0005298	0.513692	0	0	0	0	0.00278552	0	N	N	N	N	N	N	N	N	N	N	N	N	N	CSQ=A|intron_variant|MODIFIER|ASB11|ENSG00000165192|Transcript|ENST00000344384.8|protein_coding||2/6||||||||rs774941074||-1||HGNC|HGNC:17186||5|A1|||0.0005|||||||||||||||||||||||3.693|0.171655|0.868|,A|intron_variant|MODIFIER|ASB11|ENSG00000165192|Transcript|ENST00000380470.7|protein_coding||2/6||||||||rs774941074||-1||HGNC|HGNC:17186||1||||0.0005|||||||||||||||||||||||3.693|0.171655|0.868|,A|int…	N	N	3.693	0.868	N	N
X	15300491	rs183490355	A	G	A	G	0.0059321	0	0	0	0.00199402	0	0	0.00808946	0.0414938	0.00581395	0	0.0555556	0	0	0.0149864	0	0.105263	0	0	0.0137931	0	CSQ=G|intron_variant|MODIFIER|ASB11|ENSG00000165192|Transcript|ENST00000344384.8|protein_coding||2/6||||||||rs183490355||-1||HGNC|HGNC:17186||5|A1|||0.0005|0.002|0|0|0|0||||||||||||||||||1.244|-0.063128|0.868|,G|intron_variant|MODIFIER|ASB11|ENSG00000165192|Transcript|ENST00000380470.7|protein_coding||2/6||||||||rs183490355||-1||HGNC|HGNC:17186||1||||0.0005|0.002|0|0|0|0||||||||||||||||||1.244|-0…	N	N	1.244	0.868	N	N
X	15300495	rs55651049	G	A	G	A	0.0612142	0	0.0013089	0.131854	0.0937188	0.0648855	0.04039	0.0516298	0.0414938	0.0639535	0.0522876	0.0925926	0.0661157	0.0121951	0.0422343	0.0298507	0	0.00759013	0.0543933	0.0206897	0.0754717	CSQ=A|intron_variant|MODIFIER|ASB11|ENSG00000165192|Transcript|ENST00000344384.8|protein_coding||2/6||||||||rs55651049||-1||HGNC|HGNC:17186||5|A1|||0.0686|0.0937|0.0649|0.0013|0.1319|0.0404||||||||||||||||||1.142|-0.078087|0.868|,A|intron_variant|MODIFIER|ASB11|ENSG00000165192|Transcript|ENST00000380470.7|protein_coding||2/6||||||||rs55651049||-1||HGNC|HGNC:17186||1||||0.0686|0.0937|0.0649|0.0013…	N	N	1.142	0.868	N	N
X	15300496	.	A	G	A	G	0.0002649	0.513692	0	0.00130548	0	0	0	0	N	N	N	N	N	N	N	N	N	N	N	N	N	CSQ=G|intron_variant|MODIFIER|ASB11|ENSG00000165192|Transcript|ENST00000344384.8|protein_coding||2/6||||||||rs773505120||-1||HGNC|HGNC:17186||5|A1|||0.0003|||||||||||||||||||||||2.922|0.110879|0.868|,G|intron_variant|MODIFIER|ASB11|ENSG00000165192|Transcript|ENST00000380470.7|protein_coding||2/6||||||||rs773505120||-1||HGNC|HGNC:17186||1||||0.0003|||||||||||||||||||||||2.922|0.110879|0.868|,G|int…	N	N	2.922	0.868	N	N
X	15300522	rs149519656	A	G	A	G	0.00353401	0	0	0	0.00997009	0	0	0.00618606	0.00414938	0.00872093	0	0	0	0	0	0	0	0.0227704	0	0	0	CSQ=G|intron_variant|MODIFIER|ASB11|ENSG00000165192|Transcript|ENST00000344384.8|protein_coding||2/6||||||||rs149519656||-1||HGNC|HGNC:17186||5|A1|||0.0026|0.01|0|0|0|0||||||||||||||||||5.886|0.352539|0.868|,G|intron_variant|MODIFIER|ASB11|ENSG00000165192|Transcript|ENST00000380470.7|protein_coding||2/6||||||||rs149519656||-1||HGNC|HGNC:17186||1||||0.0026|0.01|0|0|0|0||||||||||||||||||5.886|0.352…	N	N	5.886	0.868	N	N
X	15300550	rs187531550	C	T	C	T	0.0002649	0.513692	0	0.00130548	0	0	0	0	N	N	N	N	N	N	N	N	N	N	N	N	N	CSQ=T|intron_variant|MODIFIER|ASB11|ENSG00000165192|Transcript|ENST00000344384.8|protein_coding||2/6||||||||rs187531550||-1||HGNC|HGNC:17186||5|A1|||0.0003|0|0|0|0.0013|0||||||||||||||||||1.623|-0.014565|0.868|,T|intron_variant|MODIFIER|ASB11|ENSG00000165192|Transcript|ENST00000380470.7|protein_coding||2/6||||||||rs187531550||-1||HGNC|HGNC:17186||1||||0.0003|0|0|0|0.0013|0||||||||||||||||||1.623|…	N	N	1.623	0.868	N	N
X	15300553	rs192342969	T	G	T	G	0.00100972	0	0	0	0.00299103	0	0	0.00071378	0	0	0	0	0	0	0	0	0	0	0	0	0	CSQ=G|intron_variant|MODIFIER|ASB11|ENSG00000165192|Transcript|ENST00000344384.8|protein_coding||2/6||||||||rs192342969||-1||HGNC|HGNC:17186||5|A1|||0.0008|0.003|0|0|0|0||||||||||||||||||1.776|0.002769|0.868|,G|intron_variant|MODIFIER|ASB11|ENSG00000165192|Transcript|ENST00000380470.7|protein_coding||2/6||||||||rs192342969||-1||HGNC|HGNC:17186||1||||0.0008|0.003|0|0|0|0||||||||||||||||||1.776|0.0…	N	N	1.776	0.868	N	N
X	15300686	.	G	A	G	A	0.00024108	0.486308	N	N	N	N	N	0.0003125	0	0	0	0	0	0	0.0013624	0	0	0	0	0	0	CSQ=A|intron_variant|MODIFIER|ASB11|ENSG00000165192|Transcript|ENST00000344384.8|protein_coding||2/6||||||||||-1||HGNC|HGNC:17186||5|A1||||||||||||||||||||||||||1.246|-0.062856|0.868|,A|intron_variant|MODIFIER|ASB11|ENSG00000165192|Transcript|ENST00000380470.7|protein_coding||2/6||||||||||-1||HGNC|HGNC:17186||1|||||||||||||||||||||||||||1.246|-0.062856|0.868|,A|intron_variant|MODIFIER|ASB11|ENSG0…	N	N	1.246	0.868	N	N
X	15300688	.	AT	A	A	A	0.0002649	0.513692	0	0	0.00099701	0	0	0.00099701	N	N	N	N	N	N	N	N	N	N	N	N	N	CSQ=-|intron_variant|MODIFIER|ASB11|ENSG00000165192|Transcript|ENST00000344384.8|protein_coding||2/6||||||||rs754711645||-1||HGNC|HGNC:17186||5|A1||||||||||||||||||||||||||||0.868|,-|intron_variant|MODIFIER|ASB11|ENSG00000165192|Transcript|ENST00000380470.7|protein_coding||2/6||||||||rs754711645||-1||HGNC|HGNC:17186||1|||||||||||||||||||||||||||||0.868|,-|intron_variant|MODIFIER|ASB11|ENSG0000016…	N	N	N	0.868	N	N
X	15300707	.	C	A	C	A	0.0002649	0.513692	0.0013089	0	0	0	0	0	N	N	N	N	N	N	N	N	N	N	N	N	N	CSQ=A|intron_variant|MODIFIER|ASB11|ENSG00000165192|Transcript|ENST00000344384.8|protein_coding||2/6||||||||rs765168306||-1||HGNC|HGNC:17186||5|A1|||0.0003|||||||||||||||||||||||5.298|0.299897|0.868|,A|intron_variant|MODIFIER|ASB11|ENSG00000165192|Transcript|ENST00000380470.7|protein_coding||2/6||||||||rs765168306||-1||HGNC|HGNC:17186||1||||0.0003|||||||||||||||||||||||5.298|0.299897|0.868|,A|int…	N	N	5.298	0.868	N	N
X	15300732	.	C	T	C	T	0.00096432	0.486308	N	N	N	N	N	0.0009375	0	0	0	0.0185185	0	0	0.0013624	0	0	0	0	0.00689655	0	CSQ=T|intron_variant|MODIFIER|ASB11|ENSG00000165192|Transcript|ENST00000344384.8|protein_coding||2/6||||||||||-1||HGNC|HGNC:17186||5|A1||||||||||||||||||||||||||1.951|0.021483|0.868|,T|intron_variant|MODIFIER|ASB11|ENSG00000165192|Transcript|ENST00000380470.7|protein_coding||2/6||||||||||-1||HGNC|HGNC:17186||1|||||||||||||||||||||||||||1.951|0.021483|0.868|,T|intron_variant|MODIFIER|ASB11|ENSG000…	N	N	1.951	0.868	N	N
X	15300778	.	G	A	G	A	0.00024108	0.486308	N	N	N	N	N	0.0003125	0	0.00290698	0	0	0	0	0	0	0	0	0	0	0	CSQ=A|intron_variant|MODIFIER|ASB11|ENSG00000165192|Transcript|ENST00000344384.8|protein_coding||2/6||||||||rs1230842123||-1||HGNC|HGNC:17186||5|A1||||||||||||||||||||||||||2.039|0.030623|0.868|,A|intron_variant|MODIFIER|ASB11|ENSG00000165192|Transcript|ENST00000380470.7|protein_coding||2/6||||||||rs1230842123||-1||HGNC|HGNC:17186||1|||||||||||||||||||||||||||2.039|0.030623|0.868|,A|intron_varian…	N	N	2.039	0.868	N	N
X	15300784	rs184147671	G	A	G	A	0.00050486	0	0.0013089	0	0	0	0	0.00071378	0	0	0	0	0	0	0	0	0	0	0	0.0206897	0	CSQ=A|intron_variant|MODIFIER|ASB11|ENSG00000165192|Transcript|ENST00000344384.8|protein_coding||2/6||||||||rs184147671||-1||HGNC|HGNC:17186||5|A1|||0.0003|0|0|0.0013|0|0||||||||||||||||||2.101|0.036784|0.868|,A|intron_variant|MODIFIER|ASB11|ENSG00000165192|Transcript|ENST00000380470.7|protein_coding||2/6||||||||rs184147671||-1||HGNC|HGNC:17186||1||||0.0003|0|0|0.0013|0|0||||||||||||||||||2.101|0…	N	N	2.101	0.868	N	N
X	15300791	.	GTC	G	G	G	0.00048216	0.486308	N	N	N	N	N	0.0003125	0	0	0	0	0	0	0	0	0	0	0	0.00689655	0	CSQ=-|intron_variant|MODIFIER|ASB11|ENSG00000165192|Transcript|ENST00000344384.8|protein_coding||2/6||||||||||-1||HGNC|HGNC:17186||5|A1||||||||||||||||||||||||||||0.868|,-|intron_variant|MODIFIER|ASB11|ENSG00000165192|Transcript|ENST00000380470.7|protein_coding||2/6||||||||||-1||HGNC|HGNC:17186||1|||||||||||||||||||||||||||||0.868|,-|intron_variant|MODIFIER|ASB11|ENSG00000165192|Transcript|ENST00…	N	N	N	0.868	N	N
X	15300905	rs12690160	G	A	-	A	0.340023	0	0.431937	0.402089	0.215354	0.284351	0.623955	0.278373	0.294606	0.165698	0.352941	0.222222	0.363636	0.195122	0.39782	0.206823	0.394737	0.204934	0.472803	0.37931	0.377358	CSQ=A|intron_variant|MODIFIER|ASB11|ENSG00000165192|Transcript|ENST00000344384.8|protein_coding||2/6||||||||rs12690160||-1||HGNC|HGNC:17186||5|A1|||0.3844|0.2154|0.2844|0.4319|0.4021|0.624||||||||||||||||||0.540|-0.199575|0.868|,A|intron_variant|MODIFIER|ASB11|ENSG00000165192|Transcript|ENST00000380470.7|protein_coding||2/6||||||||rs12690160||-1||HGNC|HGNC:17186||1||||0.3844|0.2154|0.2844|0.4319|…	N	N	0.54	0.868	N	N
X	15300933	.	C	A	C	A	0.00168756	0.486308	N	N	N	N	N	0.0021875	0	0	0.0457516	0	0	0	0	0	0	0	0	0	0	CSQ=A|intron_variant|MODIFIER|ASB11|ENSG00000165192|Transcript|ENST00000344384.8|protein_coding||2/6||||||||||-1||HGNC|HGNC:17186||5|A1||||||||||||||||||||||||||0.446|-0.227715|0.868|,A|intron_variant|MODIFIER|ASB11|ENSG00000165192|Transcript|ENST00000380470.7|protein_coding||2/6||||||||||-1||HGNC|HGNC:17186||1|||||||||||||||||||||||||||0.446|-0.227715|0.868|,A|intron_variant|MODIFIER|ASB11|ENSG0…	N	N	0.446	0.868	N	N
X	15300934	.	G	A	G	A	0.0010596	0.513692	0	0	0	0	0.00557103	0	N	N	N	N	N	N	N	N	N	N	N	N	N	CSQ=A|intron_variant|MODIFIER|ASB11|ENSG00000165192|Transcript|ENST00000344384.8|protein_coding||2/6||||||||rs777195031||-1||HGNC|HGNC:17186||5|A1|||0.0011|||||||||||||||||||||||0.771|-0.143886|0.868|,A|intron_variant|MODIFIER|ASB11|ENSG00000165192|Transcript|ENST00000380470.7|protein_coding||2/6||||||||rs777195031||-1||HGNC|HGNC:17186||1||||0.0011|||||||||||||||||||||||0.771|-0.143886|0.868|,A|i…	N	N	0.771	0.868	N	N
X	15300941	.	T	C	T	C	0.00072324	0.486308	N	N	N	N	N	0.0009375	0.00414938	0	0	0	0	0	0.0027248	0	0	0	0	0	0	CSQ=C|intron_variant|MODIFIER|ASB11|ENSG00000165192|Transcript|ENST00000344384.8|protein_coding||2/6||||||||||-1||HGNC|HGNC:17186||5|A1||||||||||||||||||||||||||1.373|-0.045476|0.868|,C|intron_variant|MODIFIER|ASB11|ENSG00000165192|Transcript|ENST00000380470.7|protein_coding||2/6||||||||||-1||HGNC|HGNC:17186||1|||||||||||||||||||||||||||1.373|-0.045476|0.868|,C|intron_variant|MODIFIER|ASB11|ENSG0…	N	N	1.373	0.868	N	N
X	15300956	.	T	TTTTA	T	TTTTA	0.00409836	0.486308	N	N	N	N	N	0.005	0	0.00290698	0.0522876	0	0	0	0	0.010661	0	0	0	0.0137931	0	CSQ=TTTA|intron_variant|MODIFIER|ASB11|ENSG00000165192|Transcript|ENST00000344384.8|protein_coding||2/6||||||||rs1039776963||-1||HGNC|HGNC:17186||5|A1||||||||||||||||||||||||||0.836|-0.130582|0.868|,TTTA|intron_variant|MODIFIER|ASB11|ENSG00000165192|Transcript|ENST00000380470.7|protein_coding||2/6||||||||rs1039776963||-1||HGNC|HGNC:17186||1|||||||||||||||||||||||||||0.836|-0.130582|0.868|,TTTA|in…	N	N	0.836	0.868	N	N
X	15301000	.	C	T	C	T	0.015188	0.486308	N	N	N	N	N	0.01875	0	0.00290698	0.0326797	0	0	0	0.00817439	0.0746269	0	0.00948767	0.0125523	0	0.0943396	CSQ=T|intron_variant|MODIFIER|ASB11|ENSG00000165192|Transcript|ENST00000344384.8|protein_coding||2/6||||||||rs867224075||-1||HGNC|HGNC:17186||5|A1||||||||||||||||||||||||||0.222|-0.321845|0.868|,T|intron_variant|MODIFIER|ASB11|ENSG00000165192|Transcript|ENST00000380470.7|protein_coding||2/6||||||||rs867224075||-1||HGNC|HGNC:17186||1|||||||||||||||||||||||||||0.222|-0.321845|0.868|,T|intron_varian…	N	N	0.222	0.868	N	N
X	15301023	.	G	A	G	A	0.00024108	0.486308	N	N	N	N	N	0.0003125	0	0	0	0.0185185	0	0	0	0	0	0	0	0	0	CSQ=A|intron_variant|MODIFIER|ASB11|ENSG00000165192|Transcript|ENST00000344384.8|protein_coding||2/6||||||||rs754727042||-1||HGNC|HGNC:17186||5|A1||||||||||||||||||||||||||0.037|-0.544541|0.868|,A|intron_variant|MODIFIER|ASB11|ENSG00000165192|Transcript|ENST00000380470.7|protein_coding||2/6||||||||rs754727042||-1||HGNC|HGNC:17186||1|||||||||||||||||||||||||||0.037|-0.544541|0.868|,A|intron_varian…	N	N	0.037	0.868	N	N
X	15301024	.	C	T	C	T	0.00048216	0.486308	N	N	N	N	N	0.0003125	0	0	0	0	0	0	0.0013624	0	0	0	0	0	0	CSQ=T|intron_variant|MODIFIER|ASB11|ENSG00000165192|Transcript|ENST00000344384.8|protein_coding||2/6||||||||rs780976350||-1||HGNC|HGNC:17186||5|A1||||||||||||||||||||||||||0.570|-0.191183|0.868|,T|intron_variant|MODIFIER|ASB11|ENSG00000165192|Transcript|ENST00000380470.7|protein_coding||2/6||||||||rs780976350||-1||HGNC|HGNC:17186||1|||||||||||||||||||||||||||0.570|-0.191183|0.868|,T|intron_varian…	N	N	0.57	0.868	N	N
X	15301025	.	G	A	G	A	0.00048216	0.486308	N	N	N	N	N	0.0003125	0	0.00290698	0	0	0	0	0	0	0	0	0	0	0	CSQ=A|intron_variant|MODIFIER|ASB11|ENSG00000165192|Transcript|ENST00000344384.8|protein_coding||2/6||||||||rs1019667877||-1||HGNC|HGNC:17186||5|A1||||||||||||||||||||||||||2.013|0.027967|0.868|,A|intron_variant|MODIFIER|ASB11|ENSG00000165192|Transcript|ENST00000380470.7|protein_coding||2/6||||||||rs1019667877||-1||HGNC|HGNC:17186||1|||||||||||||||||||||||||||2.013|0.027967|0.868|,A|intron_varian…	N	N	2.013	0.868	N	N
X	15301075	.	G	C	G	C	0.0002649	0.513692	0.0013089	0	0	0	0	0	N	N	N	N	N	N	N	N	N	N	N	N	N	CSQ=C|intron_variant|MODIFIER|ASB11|ENSG00000165192|Transcript|ENST00000344384.8|protein_coding||2/6||||||||rs751046923||-1||HGNC|HGNC:17186||5|A1|||0.0003|||||||||||||||||||||||1.230|-0.065062|0.868|,C|intron_variant|MODIFIER|ASB11|ENSG00000165192|Transcript|ENST00000380470.7|protein_coding||2/6||||||||rs751046923||-1||HGNC|HGNC:17186||1||||0.0003|||||||||||||||||||||||1.230|-0.065062|0.868|,C|i…	N	N	1.23	0.868	N	N
X	15301094	.	C	G	C	G	0.0002649	0.513692	0	0	0.00099701	0	0	0.00099701	N	N	N	N	N	N	N	N	N	N	N	N	N	CSQ=G|intron_variant|MODIFIER|ASB11|ENSG00000165192|Transcript|ENST00000344384.8|protein_coding||2/6||||||||rs756923249||-1||HGNC|HGNC:17186||5|A1|||0.0003|||||||||||||||||||||||2.975|0.115183|0.868|,G|intron_variant|MODIFIER|ASB11|ENSG00000165192|Transcript|ENST00000380470.7|protein_coding||2/6||||||||rs756923249||-1||HGNC|HGNC:17186||1||||0.0003|||||||||||||||||||||||2.975|0.115183|0.868|,G|int…	N	N	2.975	0.868	N	N
X	15301095	rs188822092	T	C	T	C	0.0130001	0	0	0	0.0598205	0.00381679	0	0.0206995	0.00414938	0.00581395	0.00653595	0	0.00826446	0.0121951	0	0.0021322	0	0.0056926	0.0711297	0	0	CSQ=C|intron_variant|MODIFIER|ASB11|ENSG00000165192|Transcript|ENST00000344384.8|protein_coding||2/6||||||||rs188822092||-1||HGNC|HGNC:17186||5|A1|||0.0164|0.0598|0.0038|0|0|0||||||||||||||||||5.198|0.291328|0.868|,C|intron_variant|MODIFIER|ASB11|ENSG00000165192|Transcript|ENST00000380470.7|protein_coding||2/6||||||||rs188822092||-1||HGNC|HGNC:17186||1||||0.0164|0.0598|0.0038|0|0|0|||||||||||||||…	N	N	5.198	0.868	N	N
X	15301101	rs192647977	T	A	T	A	0.0002649	0.513692	0	0.00130548	0	0	0	0	N	N	N	N	N	N	N	N	N	N	N	N	N	CSQ=A|intron_variant|MODIFIER|ASB11|ENSG00000165192|Transcript|ENST00000344384.8|protein_coding||2/6||||||||rs192647977||-1||HGNC|HGNC:17186||5|A1|||0.0003|0|0|0|0.0013|0||||||||||||||||||4.062|0.199985|0.868|,A|intron_variant|MODIFIER|ASB11|ENSG00000165192|Transcript|ENST00000380470.7|protein_coding||2/6||||||||rs192647977||-1||HGNC|HGNC:17186||1||||0.0003|0|0|0|0.0013|0||||||||||||||||||4.062|0…	N	N	4.062	0.868	N	N
X	15301130	.	T	C	T	C	0.00517481	0	0	0	0.0209372	0	0	0.00689983	0	0.0116279	0	0	0	0	0	0.00639659	0	0	0.0041841	0	0	CSQ=C|intron_variant|MODIFIER|ASB11|ENSG00000165192|Transcript|ENST00000344384.8|protein_coding||2/6||||||||rs769075043||-1||HGNC|HGNC:17186||5|A1|||0.0056|||||||||||||||||||||||1.230|-0.065057|0.868|,C|intron_variant|MODIFIER|ASB11|ENSG00000165192|Transcript|ENST00000380470.7|protein_coding||2/6||||||||rs769075043||-1||HGNC|HGNC:17186||1||||0.0056|||||||||||||||||||||||1.230|-0.065057|0.868|,C|i…	N	N	1.23	0.868	N	N
X	15301168	.	G	A	G	A	0.0002649	0.513692	0	0	0	0	0.00139276	0	N	N	N	N	N	N	N	N	N	N	N	N	N	CSQ=A|intron_variant|MODIFIER|ASB11|ENSG00000165192|Transcript|ENST00000344384.8|protein_coding||2/6||||||||rs779593224||-1||HGNC|HGNC:17186||5|A1|||0.0003|||||||||||||||||||||||2.362|0.061899|0.868|,A|intron_variant|MODIFIER|ASB11|ENSG00000165192|Transcript|ENST00000380470.7|protein_coding||2/6||||||||rs779593224||-1||HGNC|HGNC:17186||1||||0.0003|||||||||||||||||||||||2.362|0.061899|0.868|,A|int…	N	N	2.362	0.868	N	N
X	15301173	rs184436547	G	A	G	A	0.0002649	0.513692	0	0	0	0.0019084	0	0	N	N	N	N	N	N	N	N	N	N	N	N	N	CSQ=A|intron_variant|MODIFIER|ASB11|ENSG00000165192|Transcript|ENST00000344384.8|protein_coding||2/6||||||||rs184436547||-1||HGNC|HGNC:17186||5|A1|||0.0003|0|0.0019|0|0|0||||||||||||||||||2.448|0.069885|0.868|,A|intron_variant|MODIFIER|ASB11|ENSG00000165192|Transcript|ENST00000380470.7|protein_coding||2/6||||||||rs184436547||-1||HGNC|HGNC:17186||1||||0.0003|0|0.0019|0|0|0||||||||||||||||||2.448|0…	N	N	2.448	0.868	N	N
X	15301191	.	G	C	G	C	0.00072324	0.486308	N	N	N	N	N	0.0009375	0.00829876	0	0	0.0185185	0	0	0	0	0	0	0	0	0	CSQ=C|intron_variant|MODIFIER|ASB11|ENSG00000165192|Transcript|ENST00000344384.8|protein_coding||2/6||||||||||-1||HGNC|HGNC:17186||5|A1||||||||||||||||||||||||||2.565|0.080381|0.868|,C|intron_variant|MODIFIER|ASB11|ENSG00000165192|Transcript|ENST00000380470.7|protein_coding||2/6||||||||||-1||HGNC|HGNC:17186||1|||||||||||||||||||||||||||2.565|0.080381|0.868|,C|intron_variant|MODIFIER|ASB11|ENSG000…	N	N	2.565	0.868	N	N
X	15301199	.	G	T	G	T	0.0002412	0.486502	N	N	N	N	N	0.0003125	0	0	0	0	0	0.0121951	0	0	0	0	0	0	0	CSQ=T|intron_variant|MODIFIER|ASB11|ENSG00000165192|Transcript|ENST00000344384.8|protein_coding||2/6||||||||||-1||HGNC|HGNC:17186||5|A1||||||||||||||||||||||||||2.091|0.035859|0.868|,T|intron_variant|MODIFIER|ASB11|ENSG00000165192|Transcript|ENST00000380470.7|protein_coding||2/6||||||||||-1||HGNC|HGNC:17186||1|||||||||||||||||||||||||||2.091|0.035859|0.868|,T|intron_variant|MODIFIER|ASB11|ENSG000…	N	N	2.091	0.868	N	N
X	15301214	rs5935938	T	C	C	C	0.320712	0	0.431937	0.406005	0.244267	0.28626	0.625348	0.24887	0.298755	0.19186	0.228758	0.222222	0.371901	0.256098	0.310627	0.117271	0.421053	0.244782	0.213389	0.317241	0.471698	CSQ=C|intron_variant|MODIFIER|ASB11|ENSG00000165192|Transcript|ENST00000344384.8|protein_coding||2/6||||||||rs5935938||-1||HGNC|HGNC:17186||5|A1|||0.3934|0.2443|0.2863|0.4319|0.406|0.6253||||||||||||||||||2.153|0.041982|0.868|,C|intron_variant|MODIFIER|ASB11|ENSG00000165192|Transcript|ENST00000380470.7|protein_coding||2/6||||||||rs5935938||-1||HGNC|HGNC:17186||1||||0.3934|0.2443|0.2863|0.4319|0.4…	N	N	2.153	0.868	N	N
X	15301229	rs201791187	CT	C	C	C	0.0383693	0	0	0	0.0847458	0.00954198	0	0.0525815	0.0746888	0.104651	0.0196078	0.0740741	0.00826446	0.097561	0.0108992	0.0170576	0.157895	0.0474383	0.0167364	0.0206897	0.226415	CSQ=-|intron_variant|MODIFIER|ASB11|ENSG00000165192|Transcript|ENST00000344384.8|protein_coding||2/6||||||||rs201791187||-1||HGNC|HGNC:17186||5|A1|||0.0238|0.0847|0.0095|0|0|0||||||||||||||||||0.282|-0.290395|0.868|,-|intron_variant|MODIFIER|ASB11|ENSG00000165192|Transcript|ENST00000380470.7|protein_coding||2/6||||||||rs201791187||-1||HGNC|HGNC:17186||1||||0.0238|0.0847|0.0095|0|0|0||||||||||||||…	N	N	0.282	0.868	N	N
X	15301232	.	G	A	G	A	0.0383693	0	0	0	0.0847458	0.00954198	0	0.0525815	0.0746888	0.104651	0.0196078	0.0740741	0.00826446	0.097561	0.0108992	0.0170576	0.157895	0.0474383	0.0167364	0.0206897	0.226415	CSQ=A|intron_variant|MODIFIER|ASB11|ENSG00000165192|Transcript|ENST00000344384.8|protein_coding||2/6||||||||rs760796127||-1||HGNC|HGNC:17186||5|A1|||0.0238|||||||||||||||||||||||0.502|-0.210356|0.868|,A|intron_variant|MODIFIER|ASB11|ENSG00000165192|Transcript|ENST00000380470.7|protein_coding||2/6||||||||rs760796127||-1||HGNC|HGNC:17186||1||||0.0238|||||||||||||||||||||||0.502|-0.210356|0.868|,A|i…	N	N	0.502	0.868	N	N
X	15301249	rs12859158	C	T	C	T	0.257857	0	0.244764	0.157963	0.353938	0.322519	0.150418	0.278848	0.170124	0.392442	0.163399	0.203704	0.305785	0.268293	0.0776567	0.616205	0.157895	0.182163	0.301255	0.151724	0.0754717	CSQ=T|intron_variant|MODIFIER|ASB11|ENSG00000165192|Transcript|ENST00000344384.8|protein_coding||2/6||||||||rs12859158||-1||HGNC|HGNC:17186||5|A1|||0.2490|0.3539|0.3225|0.2448|0.158|0.1504||||||||||||||||||0.910|-0.116631|0.868|,T|intron_variant|MODIFIER|ASB11|ENSG00000165192|Transcript|ENST00000380470.7|protein_coding||2/6||||||||rs12859158||-1||HGNC|HGNC:17186||1||||0.2490|0.3539|0.3225|0.2448|…	N	N	0.91	0.868	N	N
X	15301259	.	G	A	G	A	0.00238411	0.513692	0	0	0	0	0.0125348	0	N	N	N	N	N	N	N	N	N	N	N	N	N	CSQ=A|intron_variant|MODIFIER|ASB11|ENSG00000165192|Transcript|ENST00000344384.8|protein_coding||2/6||||||||rs776771097||-1||HGNC|HGNC:17186||5|A1|||0.0024|||||||||||||||||||||||0.299|-0.282690|0.868|,A|intron_variant|MODIFIER|ASB11|ENSG00000165192|Transcript|ENST00000380470.7|protein_coding||2/6||||||||rs776771097||-1||HGNC|HGNC:17186||1||||0.0024|||||||||||||||||||||||0.299|-0.282690|0.868|,A|i…	N	N	0.299	0.868	N	N
X	15301266	.	C	A	C	A	0.0012054	0.486308	N	N	N	N	N	0.00125	0	0.00581395	0	0	0	0	0	0.0021322	0	0.00189753	0	0	0	CSQ=A|intron_variant|MODIFIER|ASB11|ENSG00000165192|Transcript|ENST00000344384.8|protein_coding||2/6||||||||rs1008342798||-1||HGNC|HGNC:17186||5|A1||||||||||||||||||||||||||0.836|-0.130556|0.868|,A|intron_variant|MODIFIER|ASB11|ENSG00000165192|Transcript|ENST00000380470.7|protein_coding||2/6||||||||rs1008342798||-1||HGNC|HGNC:17186||1|||||||||||||||||||||||||||0.836|-0.130556|0.868|,A|intron_vari…	N	N	0.836	0.868	N	N
X	15301331	rs73635080	T	A	T	A	0.0131263	0	0	0	0.0598205	0.00381679	0	0.0206995	0.00414938	0.00581395	0.00653595	0	0.00826446	0.0121951	0	0.0021322	0	0.0056926	0.0711297	0	0	CSQ=A|intron_variant|MODIFIER|ASB11|ENSG00000165192|Transcript|ENST00000344384.8|protein_coding||2/6||||||||rs73635080||-1||HGNC|HGNC:17186||5|A1|||0.0164|0.0598|0.0038|0|0|0||||||||||||||||||2.567|0.080571|0.868|,A|intron_variant|MODIFIER|ASB11|ENSG00000165192|Transcript|ENST00000380470.7|protein_coding||2/6||||||||rs73635080||-1||HGNC|HGNC:17186||1||||0.0164|0.0598|0.0038|0|0|0|||||||||||||||||…	N	N	2.567	0.868	N	N
X	15301371	.	G	T	G	T	0.0002649	0.513692	0	0	0.00099701	0	0	0.00099701	N	N	N	N	N	N	N	N	N	N	N	N	N	CSQ=T|intron_variant|MODIFIER|ASB11|ENSG00000165192|Transcript|ENST00000344384.8|protein_coding||2/6||||||||rs764965101||-1||HGNC|HGNC:17186||5|A1|||0.0003|||||||||||||||||||||||2.609|0.084212|0.868|,T|intron_variant|MODIFIER|ASB11|ENSG00000165192|Transcript|ENST00000380470.7|protein_coding||2/6||||||||rs764965101||-1||HGNC|HGNC:17186||1||||0.0003|||||||||||||||||||||||2.609|0.084212|0.868|,T|int…	N	N	2.609	0.868	N	N
X	15301382	.	G	A	G	A	0.0002649	0.513692	0.0013089	0	0	0	0	0	N	N	N	N	N	N	N	N	N	N	N	N	N	CSQ=A|intron_variant|MODIFIER|ASB11|ENSG00000165192|Transcript|ENST00000344384.8|protein_coding||2/6||||||||rs752470054||-1||HGNC|HGNC:17186||5|A1|||0.0003|||||||||||||||||||||||4.233|0.213166|0.868|,A|intron_variant|MODIFIER|ASB11|ENSG00000165192|Transcript|ENST00000380470.7|protein_coding||2/6||||||||rs752470054||-1||HGNC|HGNC:17186||1||||0.0003|||||||||||||||||||||||4.233|0.213166|0.868|,A|int…	N	N	4.233	0.868	N	N
X	15301404	.	G	T	G	T	0.0002649	0.513692	0	0	0.00099701	0	0	0.00099701	N	N	N	N	N	N	N	N	N	N	N	N	N	CSQ=T|intron_variant|MODIFIER|ASB11|ENSG00000165192|Transcript|ENST00000344384.8|protein_coding||2/6||||||||rs762835647||-1||HGNC|HGNC:17186||5|A1|||0.0003|||||||||||||||||||||||0.222|-0.321917|0.868|,T|intron_variant|MODIFIER|ASB11|ENSG00000165192|Transcript|ENST00000380470.7|protein_coding||2/6||||||||rs762835647||-1||HGNC|HGNC:17186||1||||0.0003|||||||||||||||||||||||0.222|-0.321917|0.868|,T|i…	N	N	0.222	0.868	N	N
X	15301462	.	G	A	G	A	0.0002649	0.513692	0	0	0	0	0.00139276	0	N	N	N	N	N	N	N	N	N	N	N	N	N	CSQ=A|intron_variant|MODIFIER|ASB11|ENSG00000165192|Transcript|ENST00000344384.8|protein_coding||2/6||||||||rs764086030||-1||HGNC|HGNC:17186||5|A1|||0.0003|||||||||||||||||||||||9.733|0.779798|0.868|,A|intron_variant|MODIFIER|ASB11|ENSG00000165192|Transcript|ENST00000380470.7|protein_coding||2/6||||||||rs764086030||-1||HGNC|HGNC:17186||1||||0.0003|||||||||||||||||||||||9.733|0.779798|0.868|,A|int…	N	N	9.733	0.868	N	N
X	15301495	rs182164492	A	G	A	G	0.00315537	0	0	0.00391645	0.00099701	0.00763359	0.00278552	0.0038068	0	0	0	0	0	0	0	0	0	0	0.0627615	0	0	CSQ=G|intron_variant|MODIFIER|ASB11|ENSG00000165192|Transcript|ENST00000344384.8|protein_coding||2/6||||||||rs182164492||-1||HGNC|HGNC:17186||5|A1|||0.0026|0.001|0.0076|0|0.0039|0.0028||||||||||||||||||0.561|-0.193648|0.868|,G|intron_variant|MODIFIER|ASB11|ENSG00000165192|Transcript|ENST00000380470.7|protein_coding||2/6||||||||rs182164492||-1||HGNC|HGNC:17186||1||||0.0026|0.001|0.0076|0|0.0039|0.…	N	N	0.561	0.868	N	N
X	15301509	.	A	G	A	G	0.0002649	0.513692	0	0	0	0	0.00139276	0	N	N	N	N	N	N	N	N	N	N	N	N	N	CSQ=G|intron_variant|MODIFIER|ASB11|ENSG00000165192|Transcript|ENST00000344384.8|protein_coding||2/6||||||||rs756730250||-1||HGNC|HGNC:17186||5|A1|||0.0003|||||||||||||||||||||||2.990|0.116386|0.868|,G|intron_variant|MODIFIER|ASB11|ENSG00000165192|Transcript|ENST00000380470.7|protein_coding||2/6||||||||rs756730250||-1||HGNC|HGNC:17186||1||||0.0003|||||||||||||||||||||||2.990|0.116386|0.868|,G|int…	N	N	2.99	0.868	N	N
X	15301514	.	C	G	C	G	0.0002419	0.487668	N	N	N	N	N	0.0003127	0	0	0	0	0	0	0	0	0	0	0.0041841	0	0	CSQ=G|intron_variant|MODIFIER|ASB11|ENSG00000165192|Transcript|ENST00000344384.8|protein_coding||2/6||||||||rs1279808791||-1||HGNC|HGNC:17186||5|A1||||||||||||||||||||||||||0.124|-0.395684|0.868|,G|intron_variant|MODIFIER|ASB11|ENSG00000165192|Transcript|ENST00000380470.7|protein_coding||2/6||||||||rs1279808791||-1||HGNC|HGNC:17186||1|||||||||||||||||||||||||||0.124|-0.395684|0.868|,G|intron_vari…	N	N	0.124	0.868	N	N
X	15301525	.	AG	A	A	A	0.00940212	0.486308	N	N	N	N	N	0.001875	0.00414938	0.00290698	0.0130719	0	0	0	0.0027248	0	0	0	0	0	0	CSQ=-|intron_variant|MODIFIER|ASB11|ENSG00000165192|Transcript|ENST00000344384.8|protein_coding||2/6||||||||rs780996377||-1||HGNC|HGNC:17186||5|A1|||0.0040|||||||||||||||||||||||||0.868|,-|intron_variant|MODIFIER|ASB11|ENSG00000165192|Transcript|ENST00000380470.7|protein_coding||2/6||||||||rs780996377||-1||HGNC|HGNC:17186||1||||0.0040|||||||||||||||||||||||||0.868|,-|intron_variant|MODIFIER|ASB11…	N	N	N	0.868	N	N
X	15301525	.	AGACAGAGAGAGAG	A	A	A	0.00397351	0.513692	0	0	0.0149551	0	0	0.0149551	N	N	N	N	N	N	N	N	N	N	N	N	N	CSQ=-|intron_variant|MODIFIER|ASB11|ENSG00000165192|Transcript|ENST00000344384.8|protein_coding||2/6||||||||rs1203572096||-1||HGNC|HGNC:17186||5|A1||||||||||||||||||||||||||0.076|-0.456605|0.868|,-|intron_variant|MODIFIER|ASB11|ENSG00000165192|Transcript|ENST00000380470.7|protein_coding||2/6||||||||rs1203572096||-1||HGNC|HGNC:17186||1|||||||||||||||||||||||||||0.076|-0.456605|0.868|,-|intron_vari…	N	N	0.076	0.868	N	N
X	15301527	.	ACAGAGAGAGAGAG	A	A	A	0.00940212	0.486308	N	N	N	N	N	0.001875	0.00414938	0.00290698	0.0130719	0	0	0	0.0027248	0	0	0	0	0	0	CSQ=-|intron_variant|MODIFIER|ASB11|ENSG00000165192|Transcript|ENST00000344384.8|protein_coding||2/6||||||||rs1283107354||-1||HGNC|HGNC:17186||5|A1||||||||||||||||||||||||||0.582|-0.188067|0.868|,-|intron_variant|MODIFIER|ASB11|ENSG00000165192|Transcript|ENST00000380470.7|protein_coding||2/6||||||||rs1283107354||-1||HGNC|HGNC:17186||1|||||||||||||||||||||||||||0.582|-0.188067|0.868|,-|intron_vari…	N	N	0.582	0.868	N	N
X	15301539	.	AG	A	A	A	0.00450331	0.513692	0	0	0.0159521	0	0.00139276	0.0159521	N	N	N	N	N	N	N	N	N	N	N	N	N	CSQ=-|intron_variant|MODIFIER|ASB11|ENSG00000165192|Transcript|ENST00000344384.8|protein_coding||2/6||||||||rs750056130||-1||HGNC|HGNC:17186||5|A1|||0.0045|||||||||||||||||||||||||0.868|,-|intron_variant|MODIFIER|ASB11|ENSG00000165192|Transcript|ENST00000380470.7|protein_coding||2/6||||||||rs750056130||-1||HGNC|HGNC:17186||1||||0.0045|||||||||||||||||||||||||0.868|,-|intron_variant|MODIFIER|ASB11…	N	N	N	0.868	N	N
X	15301540	rs5935939	G	A	A	A	0.424901	0.513692	0.430628	0.406005	0.358923	0.295802	0.625348	0.358923	N	N	N	N	N	N	N	N	N	N	N	N	N	CSQ=A|intron_variant|MODIFIER|ASB11|ENSG00000165192|Transcript|ENST00000344384.8|protein_coding||2/6||||||||rs5935939||-1||HGNC|HGNC:17186||5|A1|||0.4249|0.3589|0.2958|0.4306|0.406|0.6253||||||||||||||||||0.026|-0.585013|0.868|,A|intron_variant|MODIFIER|ASB11|ENSG00000165192|Transcript|ENST00000380470.7|protein_coding||2/6||||||||rs5935939||-1||HGNC|HGNC:17186||1||||0.4249|0.3589|0.2958|0.4306|0.…	N	N	0.026	0.868	N	N
X	15301561	rs186442466	A	C	A	C	0.0111069	0	0	0	0.00398804	0.0019084	0	0.0195099	0.00829876	0.0116279	0.0261438	0.0185185	0	0	0.0286103	0.0810234	0.0526316	0.00189753	0	0.0137931	0.0566038	CSQ=C|intron_variant|MODIFIER|ASB11|ENSG00000165192|Transcript|ENST00000344384.8|protein_coding||2/6||||||||rs186442466||-1||HGNC|HGNC:17186||5|A1|||0.0013|0.004|0.0019|0|0|0||||||||||||||||||0.520|-0.205104|0.868|,C|intron_variant|MODIFIER|ASB11|ENSG00000165192|Transcript|ENST00000380470.7|protein_coding||2/6||||||||rs186442466||-1||HGNC|HGNC:17186||1||||0.0013|0.004|0.0019|0|0|0||||||||||||||||…	N	N	0.52	0.868	N	N
X	15301580	.	T	A	T	A	0.0002649	0.513692	0	0	0	0	0.00139276	0	N	N	N	N	N	N	N	N	N	N	N	N	N	CSQ=A|intron_variant|MODIFIER|ASB11|ENSG00000165192|Transcript|ENST00000344384.8|protein_coding||2/6||||||||rs748543834||-1||HGNC|HGNC:17186||5|A1|||0.0003|||||||||||||||||||||||3.299|0.141094|0.868|,A|intron_variant|MODIFIER|ASB11|ENSG00000165192|Transcript|ENST00000380470.7|protein_coding||2/6||||||||rs748543834||-1||HGNC|HGNC:17186||1||||0.0003|||||||||||||||||||||||3.299|0.141094|0.868|,A|int…	N	N	3.299	0.868	N	N
X	15301616	.	C	G	C	G	0.0002649	0.513692	0	0	0.00099701	0	0	0.00099701	N	N	N	N	N	N	N	N	N	N	N	N	N	CSQ=G|intron_variant|MODIFIER|ASB11|ENSG00000165192|Transcript|ENST00000344384.8|protein_coding||2/6||||||||rs772515454||-1||HGNC|HGNC:17186||5|A1|||0.0003|||||||||||||||||||||||0.302|-0.281664|0.868|,G|intron_variant|MODIFIER|ASB11|ENSG00000165192|Transcript|ENST00000380470.7|protein_coding||2/6||||||||rs772515454||-1||HGNC|HGNC:17186||1||||0.0003|||||||||||||||||||||||0.302|-0.281664|0.868|,G|i…	N	N	0.302	0.868	N	N
X	15301626	.	A	C	A	C	0.0002649	0.513692	0	0.00130548	0	0	0	0	N	N	N	N	N	N	N	N	N	N	N	N	N	CSQ=C|intron_variant|MODIFIER|ASB11|ENSG00000165192|Transcript|ENST00000344384.8|protein_coding||2/6||||||||rs778285698||-1||HGNC|HGNC:17186||5|A1|||0.0003|||||||||||||||||||||||2.228|0.049246|0.868|,C|intron_variant|MODIFIER|ASB11|ENSG00000165192|Transcript|ENST00000380470.7|protein_coding||2/6||||||||rs778285698||-1||HGNC|HGNC:17186||1||||0.0003|||||||||||||||||||||||2.228|0.049246|0.868|,C|int…	N	N	2.228	0.868	N	N
X	15301654	.	G	A	G	A	0.0005298	0.513692	0	0	0	0	0.00278552	0	N	N	N	N	N	N	N	N	N	N	N	N	N	CSQ=A|intron_variant|MODIFIER|ASB11|ENSG00000165192|Transcript|ENST00000344384.8|protein_coding||2/6||||||||rs747065194||-1||HGNC|HGNC:17186||5|A1|||0.0005|||||||||||||||||||||||3.508|0.157396|0.868|,A|intron_variant|MODIFIER|ASB11|ENSG00000165192|Transcript|ENST00000380470.7|protein_coding||2/6||||||||rs747065194||-1||HGNC|HGNC:17186||1||||0.0005|||||||||||||||||||||||3.508|0.157396|0.868|,A|int…	N	N	3.508	0.868	N	N
X	15301701	.	CT	C	C	C	0.00024108	0.486308	N	N	N	N	N	0	0	0	0	0	0	0	0	0	0	0	0	0	0	CSQ=-|intron_variant|MODIFIER|ASB11|ENSG00000165192|Transcript|ENST00000344384.8|protein_coding||2/6||||||||rs1212164334||-1||HGNC|HGNC:17186||5|A1||||||||||||||||||||||||||1.041|-0.094017|0.868|,-|intron_variant|MODIFIER|ASB11|ENSG00000165192|Transcript|ENST00000380470.7|protein_coding||2/6||||||||rs1212164334||-1||HGNC|HGNC:17186||1|||||||||||||||||||||||||||1.041|-0.094017|0.868|,-|intron_vari…	N	N	1.041	0.868	N	N
X	15301824	.	G	A	G	A	0.0096432	0.486308	N	N	N	N	N	0.0121875	0	0	0.00653595	0	0	0	0	0	0	0.0721063	0	0	0	CSQ=A|intron_variant|MODIFIER|ASB11|ENSG00000165192|Transcript|ENST00000344384.8|protein_coding||2/6||||||||||-1||HGNC|HGNC:17186||5|A1||||||||||||||||||||||||||0.796|-0.138585|0.868|,A|intron_variant|MODIFIER|ASB11|ENSG00000165192|Transcript|ENST00000380470.7|protein_coding||2/6||||||||||-1||HGNC|HGNC:17186||1|||||||||||||||||||||||||||0.796|-0.138585|0.868|,A|intron_variant|MODIFIER|ASB11|ENSG0…	N	N	0.796	0.868	N	N
X	15301859	.	T	A	T	A	0.0002649	0.513692	0	0	0	0.0019084	0	0	N	N	N	N	N	N	N	N	N	N	N	N	N	CSQ=A|intron_variant|MODIFIER|ASB11|ENSG00000165192|Transcript|ENST00000344384.8|protein_coding||2/6||||||||rs770960701||-1||HGNC|HGNC:17186||5|A1|||0.0003|||||||||||||||||||||||2.596|0.083140|0.868|,A|intron_variant|MODIFIER|ASB11|ENSG00000165192|Transcript|ENST00000380470.7|protein_coding||2/6||||||||rs770960701||-1||HGNC|HGNC:17186||1||||0.0003|||||||||||||||||||||||2.596|0.083140|0.868|,A|int…	N	N	2.596	0.868	N	N
X	15301862	.	T	A	T	A	0.00024108	0.486308	N	N	N	N	N	0.0003125	0	0.00290698	0	0	0	0	0	0	0	0	0	0	0	CSQ=A|intron_variant|MODIFIER|ASB11|ENSG00000165192|Transcript|ENST00000344384.8|protein_coding||2/6||||||||||-1||HGNC|HGNC:17186||5|A1||||||||||||||||||||||||||0.267|-0.297739|0.868|,A|intron_variant|MODIFIER|ASB11|ENSG00000165192|Transcript|ENST00000380470.7|protein_coding||2/6||||||||||-1||HGNC|HGNC:17186||1|||||||||||||||||||||||||||0.267|-0.297739|0.868|,A|intron_variant|MODIFIER|ASB11|ENSG0…	N	N	0.267	0.868	N	N
X	15301874	.	T	C	T	C	0.00048216	0.486308	N	N	N	N	N	0	0	0	0	0	0	0	0	0	0	0	0	0	0	CSQ=C|intron_variant|MODIFIER|ASB11|ENSG00000165192|Transcript|ENST00000344384.8|protein_coding||2/6||||||||||-1||HGNC|HGNC:17186||5|A1||||||||||||||||||||||||||4.624|0.243934|0.868|,C|intron_variant|MODIFIER|ASB11|ENSG00000165192|Transcript|ENST00000380470.7|protein_coding||2/6||||||||||-1||HGNC|HGNC:17186||1|||||||||||||||||||||||||||4.624|0.243934|0.868|,C|intron_variant|MODIFIER|ASB11|ENSG000…	N	N	4.624	0.868	N	N
X	15301904	rs188897006	G	A	G	A	0.00997097	0	0	0	0.00199402	0.0019084	0	0.0166548	0.0165975	0.00290698	0.0130719	0.0185185	0	0	0.0667575	0	0.0263158	0	0	0.0275862	0.113208	CSQ=A|intron_variant|MODIFIER|ASB11|ENSG00000165192|Transcript|ENST00000344384.8|protein_coding||2/6||||||||rs188897006||-1||HGNC|HGNC:17186||5|A1|||0.0008|0.002|0.0019|0|0|0||||||||||||||||||1.545|-0.023882|0.868|,A|intron_variant|MODIFIER|ASB11|ENSG00000165192|Transcript|ENST00000380470.7|protein_coding||2/6||||||||rs188897006||-1||HGNC|HGNC:17186||1||||0.0008|0.002|0.0019|0|0|0||||||||||||||||…	N	N	1.545	0.868	N	N
X	15301923	.	G	A	G	A	0.0005298	0.513692	0	0	0.00199402	0	0	0.00199402	N	N	N	N	N	N	N	N	N	N	N	N	N	CSQ=A|intron_variant|MODIFIER|ASB11|ENSG00000165192|Transcript|ENST00000344384.8|protein_coding||2/6||||||||rs759807376||-1||HGNC|HGNC:17186||5|A1|||0.0005|||||||||||||||||||||||0.027|-0.582091|0.868|,A|intron_variant|MODIFIER|ASB11|ENSG00000165192|Transcript|ENST00000380470.7|protein_coding||2/6||||||||rs759807376||-1||HGNC|HGNC:17186||1||||0.0005|||||||||||||||||||||||0.027|-0.582091|0.868|,A|i…	N	N	0.027	0.868	N	N
X	15301991	rs140756593	A	C	A	C	0.00542724	0	0	0	0.0189432	0	0	0.00689983	0.00414938	0.00581395	0	0	0	0.0121951	0	0.0021322	0	0	0	0.0344828	0	CSQ=C|intron_variant|MODIFIER|ASB11|ENSG00000165192|Transcript|ENST00000344384.8|protein_coding||2/6||||||||rs140756593||-1||HGNC|HGNC:17186||5|A1|||0.0050|0.0189|0|0|0|0||||||||||||||||||2.290|0.055146|0.868|,C|intron_variant|MODIFIER|ASB11|ENSG00000165192|Transcript|ENST00000380470.7|protein_coding||2/6||||||||rs140756593||-1||HGNC|HGNC:17186||1||||0.0050|0.0189|0|0|0|0||||||||||||||||||2.290|0…	N	N	2.29	0.868	N	N
X	15302125	.	C	G	C	G	0.0013245	0.513692	0	0.00130548	0	0	0.00557103	0	N	N	N	N	N	N	N	N	N	N	N	N	N	CSQ=G|intron_variant|MODIFIER|ASB11|ENSG00000165192|Transcript|ENST00000344384.8|protein_coding||2/6||||||||rs775210782||-1||HGNC|HGNC:17186||5|A1|||0.0013|||||||||||||||||||||||9.566|0.762067|0.868|,G|intron_variant|MODIFIER|ASB11|ENSG00000165192|Transcript|ENST00000380470.7|protein_coding||2/6||||||||rs775210782||-1||HGNC|HGNC:17186||1||||0.0013|||||||||||||||||||||||9.566|0.762067|0.868|,G|int…	N	N	9.566	0.868	N	N
X	15302174	.	G	A	G	A	0.00192864	0.486308	N	N	N	N	N	0.0021875	0	0	0	0	0.0495868	0.0121951	0	0	0	0	0	0	0	CSQ=A|intron_variant|MODIFIER|ASB11|ENSG00000165192|Transcript|ENST00000344384.8|protein_coding||2/6||||||||rs572066167||-1||HGNC|HGNC:17186||5|A1||||||||||||||||||||||||||0.110|-0.410022|0.868|,A|intron_variant|MODIFIER|ASB11|ENSG00000165192|Transcript|ENST00000380470.7|protein_coding||2/6||||||||rs572066167||-1||HGNC|HGNC:17186||1|||||||||||||||||||||||||||0.110|-0.410022|0.868|,A|intron_varian…	N	N	0.11	0.868	N	N
X	15302193	.	G	A	G	A	0.00192864	0.486308	N	N	N	N	N	0.0021875	0	0	0	0	0.0495868	0.0121951	0	0	0	0	0	0	0	CSQ=A|intron_variant|MODIFIER|ASB11|ENSG00000165192|Transcript|ENST00000344384.8|protein_coding||2/6||||||||rs1417648291||-1||HGNC|HGNC:17186||5|A1||||||||||||||||||||||||||0.882|-0.121741|0.868|,A|intron_variant|MODIFIER|ASB11|ENSG00000165192|Transcript|ENST00000380470.7|protein_coding||2/6||||||||rs1417648291||-1||HGNC|HGNC:17186||1|||||||||||||||||||||||||||0.882|-0.121741|0.868|,A|intron_vari…	N	N	0.882	0.868	N	N
X	15302196	.	C	T	C	T	0.0007947	0.513692	0	0	0.00299103	0	0	0.00299103	N	N	N	N	N	N	N	N	N	N	N	N	N	CSQ=T|intron_variant|MODIFIER|ASB11|ENSG00000165192|Transcript|ENST00000344384.8|protein_coding||2/6||||||||rs762793614||-1||HGNC|HGNC:17186||5|A1|||0.0008|||||||||||||||||||||||2.061|0.032802|0.868|,T|intron_variant|MODIFIER|ASB11|ENSG00000165192|Transcript|ENST00000380470.7|protein_coding||2/6||||||||rs762793614||-1||HGNC|HGNC:17186||1||||0.0008|||||||||||||||||||||||2.061|0.032802|0.868|,T|int…	N	N	2.061	0.868	N	N
X	15302203	.	G	A	G	A	0.00063107	0	0.0013089	0	0	0	0	0.00047585	0	0	0	0	0	0	0	0	0	0	0	0.0137931	0	CSQ=A|intron_variant|MODIFIER|ASB11|ENSG00000165192|Transcript|ENST00000344384.8|protein_coding||2/6||||||||rs934098959||-1||HGNC|HGNC:17186||5|A1||||||||||||||||||||||||||0.068|-0.470052|0.868|,A|intron_variant|MODIFIER|ASB11|ENSG00000165192|Transcript|ENST00000380470.7|protein_coding||2/6||||||||rs934098959||-1||HGNC|HGNC:17186||1|||||||||||||||||||||||||||0.068|-0.470052|0.868|,A|intron_varian…	N	N	0.068	0.868	N	N
X	15302240	.	C	T	C	T	0.00024108	0.486308	N	N	N	N	N	0	0	0	0	0	0	0	0	0	0	0	0	0	0	CSQ=T|intron_variant|MODIFIER|ASB11|ENSG00000165192|Transcript|ENST00000344384.8|protein_coding||2/6||||||||||-1||HGNC|HGNC:17186||5|A1||||||||||||||||||||||||||1.291|-0.056560|0.868|,T|intron_variant|MODIFIER|ASB11|ENSG00000165192|Transcript|ENST00000380470.7|protein_coding||2/6||||||||||-1||HGNC|HGNC:17186||1|||||||||||||||||||||||||||1.291|-0.056560|0.868|,T|intron_variant|MODIFIER|ASB11|ENSG0…	N	N	1.291	0.868	N	N
X	15302336	.	G	A	G	A	0.00024108	0.486308	N	N	N	N	N	0.0003125	0	0	0	0	0	0	0.0013624	0	0	0	0	0	0	CSQ=A|intron_variant|MODIFIER|ASB11|ENSG00000165192|Transcript|ENST00000344384.8|protein_coding||2/6||||||||||-1||HGNC|HGNC:17186||5|A1||||||||||||||||||||||||||1.827|0.008354|0.868|,A|intron_variant|MODIFIER|ASB11|ENSG00000165192|Transcript|ENST00000380470.7|protein_coding||2/6||||||||||-1||HGNC|HGNC:17186||1|||||||||||||||||||||||||||1.827|0.008354|0.868|,A|intron_variant|MODIFIER|ASB11|ENSG000…	N	N	1.827	0.868	N	N
X	15302404	rs113621530	C	T	C	T	0.0024108	0.486308	N	N	N	N	N	0.001875	0	0	0	0	0.0495868	0	0	0	0	0	0	0	0	CSQ=T|intron_variant|MODIFIER|ASB11|ENSG00000165192|Transcript|ENST00000344384.8|protein_coding||2/6||||||||rs113621530||-1||HGNC|HGNC:17186||5|A1||||||||||||||||||||||||||0.536|-0.200534|0.868|,T|intron_variant|MODIFIER|ASB11|ENSG00000165192|Transcript|ENST00000380470.7|protein_coding||2/6||||||||rs113621530||-1||HGNC|HGNC:17186||1|||||||||||||||||||||||||||0.536|-0.200534|0.868|,T|intron_varian…	N	N	0.536	0.868	N	N
X	15302413	.	G	T	G	T	0.00024108	0.486308	N	N	N	N	N	0.0003125	0	0	0	0	0	0	0.0013624	0	0	0	0	0	0	CSQ=T|intron_variant|MODIFIER|ASB11|ENSG00000165192|Transcript|ENST00000344384.8|protein_coding||2/6||||||||||-1||HGNC|HGNC:17186||5|A1||||||||||||||||||||||||||0.896|-0.119166|0.868|,T|intron_variant|MODIFIER|ASB11|ENSG00000165192|Transcript|ENST00000380470.7|protein_coding||2/6||||||||||-1||HGNC|HGNC:17186||1|||||||||||||||||||||||||||0.896|-0.119166|0.868|,T|intron_variant|MODIFIER|ASB11|ENSG0…	N	N	0.896	0.868	N	N
X	15302531	.	C	G	C	G	0.0002649	0.513692	0.0013089	0	0	0	0	0	N	N	N	N	N	N	N	N	N	N	N	N	N	CSQ=G|intron_variant|MODIFIER|ASB11|ENSG00000165192|Transcript|ENST00000344384.8|protein_coding||2/6||||||||rs767086348||-1||HGNC|HGNC:17186||5|A1|||0.0003|||||||||||||||||||||||0.553|-0.195857|0.868|,G|intron_variant|MODIFIER|ASB11|ENSG00000165192|Transcript|ENST00000380470.7|protein_coding||2/6||||||||rs767086348||-1||HGNC|HGNC:17186||1||||0.0003|||||||||||||||||||||||0.553|-0.195857|0.868|,G|i…	N	N	0.553	0.868	N	N
X	15302563	.	G	A	G	A	0.00192864	0.486308	N	N	N	N	N	0.0025	0	0	0.0457516	0.0185185	0	0	0	0	0	0	0	0	0	CSQ=A|intron_variant|MODIFIER|ASB11|ENSG00000165192|Transcript|ENST00000344384.8|protein_coding||2/6||||||||rs1461197365||-1||HGNC|HGNC:17186||5|A1||||||||||||||||||||||||||2.312|0.057227|0.868|,A|intron_variant|MODIFIER|ASB11|ENSG00000165192|Transcript|ENST00000380470.7|protein_coding||2/6||||||||rs1461197365||-1||HGNC|HGNC:17186||1|||||||||||||||||||||||||||2.312|0.057227|0.868|,A|intron_varian…	N	N	2.312	0.868	N	N
X	15302587	.	G	A	G	A	0.00238411	0.513692	0	0	0	0	0.0125348	0	N	N	N	N	N	N	N	N	N	N	N	N	N	CSQ=A|intron_variant|MODIFIER|ASB11|ENSG00000165192|Transcript|ENST00000344384.8|protein_coding||2/6||||||||rs749929531||-1||HGNC|HGNC:17186||5|A1|||0.0024|||||||||||||||||||||||1.146|-0.077500|0.868|,A|intron_variant|MODIFIER|ASB11|ENSG00000165192|Transcript|ENST00000380470.7|protein_coding||2/6||||||||rs749929531||-1||HGNC|HGNC:17186||1||||0.0024|||||||||||||||||||||||1.146|-0.077500|0.868|,A|i…	N	N	1.146	0.868	N	N
X	15302602	.	C	T	C	T	0.0002649	0.513692	0	0.00130548	0	0	0	0	N	N	N	N	N	N	N	N	N	N	N	N	N	CSQ=T|intron_variant|MODIFIER|ASB11|ENSG00000165192|Transcript|ENST00000344384.8|protein_coding||2/6||||||||rs755897897||-1||HGNC|HGNC:17186||5|A1|||0.0003|||||||||||||||||||||||0.439|-0.230003|0.868|,T|intron_variant|MODIFIER|ASB11|ENSG00000165192|Transcript|ENST00000380470.7|protein_coding||2/6||||||||rs755897897||-1||HGNC|HGNC:17186||1||||0.0003|||||||||||||||||||||||0.439|-0.230003|0.868|,T|i…	N	N	0.439	0.868	N	N
X	15302603	.	G	A	G	A	0.00072324	0.486308	N	N	N	N	N	0	0	0	0	0	0	0	0	0	0	0	0	0	0	CSQ=A|intron_variant|MODIFIER|ASB11|ENSG00000165192|Transcript|ENST00000344384.8|protein_coding||2/6||||||||rs906790566||-1||HGNC|HGNC:17186||5|A1||||||||||||||||||||||||||0.039|-0.538907|0.868|,A|intron_variant|MODIFIER|ASB11|ENSG00000165192|Transcript|ENST00000380470.7|protein_coding||2/6||||||||rs906790566||-1||HGNC|HGNC:17186||1|||||||||||||||||||||||||||0.039|-0.538907|0.868|,A|intron_varian…	N	N	0.039	0.868	N	N
X	15302604	.	T	A	T	A	0.0036162	0.486308	N	N	N	N	N	0.0046875	0	0	0	0	0	0	0	0	0	0	0.0627615	0	0	CSQ=A|intron_variant|MODIFIER|ASB11|ENSG00000165192|Transcript|ENST00000344384.8|protein_coding||2/6||||||||rs1003823965||-1||HGNC|HGNC:17186||5|A1||||||||||||||||||||||||||2.151|0.041807|0.868|,A|intron_variant|MODIFIER|ASB11|ENSG00000165192|Transcript|ENST00000380470.7|protein_coding||2/6||||||||rs1003823965||-1||HGNC|HGNC:17186||1|||||||||||||||||||||||||||2.151|0.041807|0.868|,A|intron_varian…	N	N	2.151	0.868	N	N
X	15302610	.	G	A	G	A	0.00024108	0.486308	N	N	N	N	N	0.0003125	0	0	0	0	0	0	0.0013624	0	0	0	0	0	0	CSQ=A|intron_variant|MODIFIER|ASB11|ENSG00000165192|Transcript|ENST00000344384.8|protein_coding||2/6||||||||||-1||HGNC|HGNC:17186||5|A1||||||||||||||||||||||||||0.656|-0.169659|0.868|,A|intron_variant|MODIFIER|ASB11|ENSG00000165192|Transcript|ENST00000380470.7|protein_coding||2/6||||||||||-1||HGNC|HGNC:17186||1|||||||||||||||||||||||||||0.656|-0.169659|0.868|,A|intron_variant|MODIFIER|ASB11|ENSG0…	N	N	0.656	0.868	N	N
X	15302619	rs58066751	T	C	T	C	0.0179225	0	0	0	0.0558325	0.00572519	0	0.0259339	0.0207469	0.0581395	0	0	0.0330578	0.0487805	0	0.0234542	0	0.0113852	0.0125523	0	0	CSQ=C|intron_variant|MODIFIER|ASB11|ENSG00000165192|Transcript|ENST00000344384.8|protein_coding||2/6||||||||rs58066751||-1||HGNC|HGNC:17186||5|A1|||0.0156|0.0558|0.0057|0|0|0||||||||||||||||||1.804|0.005819|0.868|,C|intron_variant|MODIFIER|ASB11|ENSG00000165192|Transcript|ENST00000380470.7|protein_coding||2/6||||||||rs58066751||-1||HGNC|HGNC:17186||1||||0.0156|0.0558|0.0057|0|0|0|||||||||||||||||…	N	N	1.804	0.868	N	N
X	15302642	rs181651373	C	G	C	G	0.0002649	0.513692	0	0.00130548	0	0	0	0	N	N	N	N	N	N	N	N	N	N	N	N	N	CSQ=G|intron_variant|MODIFIER|ASB11|ENSG00000165192|Transcript|ENST00000344384.8|protein_coding||2/6||||||||rs181651373||-1||HGNC|HGNC:17186||5|A1|||0.0003|0|0|0|0.0013|0||||||||||||||||||4.186|0.209575|0.868|,G|intron_variant|MODIFIER|ASB11|ENSG00000165192|Transcript|ENST00000380470.7|protein_coding||2/6||||||||rs181651373||-1||HGNC|HGNC:17186||1||||0.0003|0|0|0|0.0013|0||||||||||||||||||4.186|0…	N	N	4.186	0.868	N	N
X	15302643	rs368172465	C	T	C	T	0.00211921	0.513692	0	0	0	0	0.0111421	0	N	N	N	N	N	N	N	N	N	N	N	N	N	CSQ=T|intron_variant|MODIFIER|ASB11|ENSG00000165192|Transcript|ENST00000344384.8|protein_coding||2/6||||||||rs368172465||-1||HGNC|HGNC:17186||5|A1|||0.0021|0|0|0|0|0.0111||||||||||||||||||0.594|-0.184841|0.868|,T|intron_variant|MODIFIER|ASB11|ENSG00000165192|Transcript|ENST00000380470.7|protein_coding||2/6||||||||rs368172465||-1||HGNC|HGNC:17186||1||||0.0021|0|0|0|0|0.0111||||||||||||||||||0.594|…	N	N	0.594	0.868	N	N
X	15302665	.	C	T	C	T	0.0005298	0.513692	0	0	0.00199402	0	0	0.00199402	N	N	N	N	N	N	N	N	N	N	N	N	N	CSQ=T|intron_variant|MODIFIER|ASB11|ENSG00000165192|Transcript|ENST00000344384.8|protein_coding||2/6||||||||rs778177113||-1||HGNC|HGNC:17186||5|A1|||0.0005|||||||||||||||||||||||5.994|0.362737|0.868|,T|intron_variant|MODIFIER|ASB11|ENSG00000165192|Transcript|ENST00000380470.7|protein_coding||2/6||||||||rs778177113||-1||HGNC|HGNC:17186||1||||0.0005|||||||||||||||||||||||5.994|0.362737|0.868|,T|int…	N	N	5.994	0.868	N	N
X	15302673	.	G	C	G	C	0.0002649	0.513692	0	0	0	0	0.00139276	0	N	N	N	N	N	N	N	N	N	N	N	N	N	CSQ=C|intron_variant|MODIFIER|ASB11|ENSG00000165192|Transcript|ENST00000344384.8|protein_coding||2/6||||||||rs747503726||-1||HGNC|HGNC:17186||5|A1|||0.0003|||||||||||||||||||||||5.636|0.329658|0.868|,C|intron_variant|MODIFIER|ASB11|ENSG00000165192|Transcript|ENST00000380470.7|protein_coding||2/6||||||||rs747503726||-1||HGNC|HGNC:17186||1||||0.0003|||||||||||||||||||||||5.636|0.329658|0.868|,C|int…	N	N	5.636	0.868	N	N
X	15302680	rs185379021	G	A	G	A	0.0002649	0.513692	0.0013089	0	0	0	0	0	N	N	N	N	N	N	N	N	N	N	N	N	N	CSQ=A|intron_variant|MODIFIER|ASB11|ENSG00000165192|Transcript|ENST00000344384.8|protein_coding||2/6||||||||rs185379021||-1||HGNC|HGNC:17186||5|A1|||0.0003|0|0|0.0013|0|0|5.706e-06|0|0|0|7.4e-05|0|0|0|0|||||||||4.142|0.206107|0.868|,A|intron_variant|MODIFIER|ASB11|ENSG00000165192|Transcript|ENST00000380470.7|protein_coding||2/6||||||||rs185379021||-1||HGNC|HGNC:17186||1||||0.0003|0|0|0.0013|0|0|5…	N	N	4.142	0.868	N	N
X	15302729	.	T	C	T	C	0.0002649	0.513692	0	0	0	0.0019084	0	0	N	N	N	N	N	N	N	N	N	N	N	N	N	CSQ=C|missense_variant&splice_region_variant|MODERATE|ASB11|ENSG00000165192|Transcript|ENST00000344384.8|protein_coding|2/7||||270|197|66|Q/R|cAa/cGa|rs781292147||-1||HGNC|HGNC:17186||5|A1|deleterious(0.01)|probably_damaging(0.992)|0.0003|||||||||||||||||||||||29.9|4.648614|0.868|deleterious(0.853),C|missense_variant&splice_region_variant|MODERATE|ASB11|ENSG00000165192|Transcript|ENST00000380470.…	N	deleterious(0.853)	29.9	0.868	deleterious(0.01)	probably_damaging(0.992)
X	15302787	.	G	A	G	A	0.00048216	0.486308	N	N	N	N	N	0	0	0	0	0	0	0	0	0	0	0	0	0	0	CSQ=A|missense_variant|MODERATE|ASB11|ENSG00000165192|Transcript|ENST00000344384.8|protein_coding|2/7||||212|139|47|P/S|Cca/Tca|rs758145043||-1||HGNC|HGNC:17186||5|A1|deleterious(0)|possibly_damaging(0.782)|||||||1.638e-05|7.606e-05|7.315e-05|0|0|0|0|0|0|||||||||25.5|3.933715|0.868|deleterious(0.738),A|missense_variant|MODERATE|ASB11|ENSG00000165192|Transcript|ENST00000380470.7|protein_coding|2/7…	N	deleterious(0.738)	25.5	0.868	deleterious(0)	possibly_damaging(0.782)
X	15302859	.	C	T	C	T	0.00024108	0.486308	N	N	N	N	N	0.0003125	0	0	0.00653595	0	0	0	0	0	0	0	0	0	0	CSQ=T|intron_variant|MODIFIER|ASB11|ENSG00000165192|Transcript|ENST00000344384.8|protein_coding||1/6||||||||rs746043626||-1||HGNC|HGNC:17186||5|A1|||||||||1.711e-05|0|0.0001133|0|0|0|0|0|0|||||||||1.763|0.001305|0.868|,T|intron_variant|MODIFIER|ASB11|ENSG00000165192|Transcript|ENST00000380470.7|protein_coding||1/6||||||||rs746043626||-1||HGNC|HGNC:17186||1||||||||||1.711e-05|0|0.0001133|0|0|0|0|0…	N	N	1.763	0.868	N	N
X	15302869	rs191262452	C	A	C	A	0.00214565	0	0	0	0.00997009	0.0019084	0	0.00356888	0	0	0	0	0	0	0	0.010661	0	0	0	0	0	CSQ=A|intron_variant|MODIFIER|ASB11|ENSG00000165192|Transcript|ENST00000344384.8|protein_coding||1/6||||||||rs191262452||-1||HGNC|HGNC:17186||5|A1|||0.0029|0.01|0.0019|0|0|0||||||||||||||||||2.383|0.063938|0.868|,A|intron_variant|MODIFIER|ASB11|ENSG00000165192|Transcript|ENST00000380470.7|protein_coding||1/6||||||||rs191262452||-1||HGNC|HGNC:17186||1||||0.0029|0.01|0.0019|0|0|0||||||||||||||||||2…	N	N	2.383	0.868	N	N
X	15302878	rs182657816	C	A	C	A	0.00732046	0	0	0	0.00797607	0.0019084	0	0.0109446	0	0.0232558	0	0	0	0.0609756	0	0.0298507	0	0.0170778	0.0083682	0	0	CSQ=A|intron_variant|MODIFIER|ASB11|ENSG00000165192|Transcript|ENST00000344384.8|protein_coding||1/6||||||||rs182657816||-1||HGNC|HGNC:17186||5|A1|||0.0024|0.008|0.0019|0|0|0||||||||||||||||||1.126|-0.080548|0.868|,A|intron_variant|MODIFIER|ASB11|ENSG00000165192|Transcript|ENST00000380470.7|protein_coding||1/6||||||||rs182657816||-1||HGNC|HGNC:17186||1||||0.0024|0.008|0.0019|0|0|0||||||||||||||||…	N	N	1.126	0.868	N	N
X	15302881	.	T	C	T	C	0.00024108	0.486308	N	N	N	N	N	0	0	0	0	0	0	0	0	0	0	0	0	0	0	CSQ=C|intron_variant|MODIFIER|ASB11|ENSG00000165192|Transcript|ENST00000344384.8|protein_coding||1/6||||||||rs1389249879||-1||HGNC|HGNC:17186||5|A1||||||||||||||||||||||||||4.218|0.212053|0.868|,C|intron_variant|MODIFIER|ASB11|ENSG00000165192|Transcript|ENST00000380470.7|protein_coding||1/6||||||||rs1389249879||-1||HGNC|HGNC:17186||1|||||||||||||||||||||||||||4.218|0.212053|0.868|,C|intron_varian…	N	N	4.218	0.868	N	N
X	15302944	rs150858220	C	T	C	T	0.0449325	0	0	0	0.0518445	0.00763359	0	0.0649536	0.0290456	0.0406977	0.156863	0.037037	0.0247934	0.0365854	0.0803815	0.104478	0.0526316	0.00948767	0.154812	0.0689655	0.113208	CSQ=T|intron_variant|MODIFIER|ASB11|ENSG00000165192|Transcript|ENST00000344384.8|protein_coding||1/6||||||||rs150858220||-1||HGNC|HGNC:17186||5|A1|||0.0148|0.0518|0.0076|0|0|0||||||||||||||||||1.202|-0.069130|0.868|,T|intron_variant|MODIFIER|ASB11|ENSG00000165192|Transcript|ENST00000380470.7|protein_coding||1/6||||||||rs150858220||-1||HGNC|HGNC:17186||1||||0.0148|0.0518|0.0076|0|0|0||||||||||||||…	N	N	1.202	0.868	N	N
X	15302964	.	G	A	G	A	0.0002649	0.513692	0	0	0	0	0.00139276	0	N	N	N	N	N	N	N	N	N	N	N	N	N	CSQ=A|intron_variant|MODIFIER|ASB11|ENSG00000165192|Transcript|ENST00000344384.8|protein_coding||1/6||||||||rs749037811||-1||HGNC|HGNC:17186||5|A1|||0.0003|||||||||||||||||||||||1.472|-0.032809|0.868|,A|intron_variant|MODIFIER|ASB11|ENSG00000165192|Transcript|ENST00000380470.7|protein_coding||1/6||||||||rs749037811||-1||HGNC|HGNC:17186||1||||0.0003|||||||||||||||||||||||1.472|-0.032809|0.868|,A|i…	N	N	1.472	0.868	N	N
X	15302967	.	G	A	G	A	0.0002649	0.513692	0	0.00130548	0	0	0	0	N	N	N	N	N	N	N	N	N	N	N	N	N	CSQ=A|intron_variant|MODIFIER|ASB11|ENSG00000165192|Transcript|ENST00000344384.8|protein_coding||1/6||||||||rs768456556||-1||HGNC|HGNC:17186||5|A1|||0.0003|||||||||||||||||||||||3.042|0.120677|0.868|,A|intron_variant|MODIFIER|ASB11|ENSG00000165192|Transcript|ENST00000380470.7|protein_coding||1/6||||||||rs768456556||-1||HGNC|HGNC:17186||1||||0.0003|||||||||||||||||||||||3.042|0.120677|0.868|,A|int…	N	N	3.042	0.868	N	N
X	15303010	rs185985281	G	A	G	A	0.0002649	0.513692	0	0	0.00099701	0	0	0.00099701	N	N	N	N	N	N	N	N	N	N	N	N	N	CSQ=A|intron_variant|MODIFIER|ASB11|ENSG00000165192|Transcript|ENST00000344384.8|protein_coding||1/6||||||||rs185985281||-1||HGNC|HGNC:17186||5|A1|||0.0003|0.001|0|0|0|0||||||||||||||||||6.312|0.393418|0.868|,A|intron_variant|MODIFIER|ASB11|ENSG00000165192|Transcript|ENST00000380470.7|protein_coding||1/6||||||||rs185985281||-1||HGNC|HGNC:17186||1||||0.0003|0.001|0|0|0|0||||||||||||||||||6.312|0.3…	N	N	6.312	0.868	N	N
X	15303047	.	G	A	G	A	0.0005298	0.513692	0	0.00261097	0	0	0	0	N	N	N	N	N	N	N	N	N	N	N	N	N	CSQ=A|intron_variant|MODIFIER|ASB11|ENSG00000165192|Transcript|ENST00000344384.8|protein_coding||1/6||||||||rs761891594||-1||HGNC|HGNC:17186||5|A1|||0.0005|||||||||||||||||||||||4.418|0.227604|0.868|,A|intron_variant|MODIFIER|ASB11|ENSG00000165192|Transcript|ENST00000380470.7|protein_coding||1/6||||||||rs761891594||-1||HGNC|HGNC:17186||1||||0.0005|||||||||||||||||||||||4.418|0.227604|0.868|,A|int…	N	N	4.418	0.868	N	N
X	15303052	.	G	A	G	A	0.0002649	0.513692	0.0013089	0	0	0	0	0	N	N	N	N	N	N	N	N	N	N	N	N	N	CSQ=A|intron_variant|MODIFIER|ASB11|ENSG00000165192|Transcript|ENST00000344384.8|protein_coding||1/6||||||||rs767529842||-1||HGNC|HGNC:17186||5|A1|||0.0003|||||||||||||||||||||||6.498|0.411897|0.868|,A|intron_variant|MODIFIER|ASB11|ENSG00000165192|Transcript|ENST00000380470.7|protein_coding||1/6||||||||rs767529842||-1||HGNC|HGNC:17186||1||||0.0003|||||||||||||||||||||||6.498|0.411897|0.868|,A|int…	N	N	6.498	0.868	N	N
X	15303077	.	G	A	G	A	0.00289296	0.486308	N	N	N	N	N	0.00375	0	0	0	0	0	0	0.0163488	0	0	0	0	0	0	CSQ=A|intron_variant|MODIFIER|ASB11|ENSG00000165192|Transcript|ENST00000344384.8|protein_coding||1/6||||||||||-1||HGNC|HGNC:17186||5|A1||||||||||||||||||||||||||3.670|0.169882|0.868|,A|intron_variant|MODIFIER|ASB11|ENSG00000165192|Transcript|ENST00000380470.7|protein_coding||1/6||||||||||-1||HGNC|HGNC:17186||1|||||||||||||||||||||||||||3.670|0.169882|0.868|,A|intron_variant|MODIFIER|ASB11|ENSG000…	N	N	3.67	0.868	N	N
X	15303108	.	C	T	C	T	0.00192864	0.486308	N	N	N	N	N	0.0021875	0	0	0	0	0	0	0.00953678	0	0	0	0	0	0	CSQ=T|intron_variant|MODIFIER|ASB11|ENSG00000165192|Transcript|ENST00000344384.8|protein_coding||1/6||||||||rs1273846218||-1||HGNC|HGNC:17186||5|A1||||||||||||||||||||||||||0.705|-0.158114|0.868|,T|intron_variant|MODIFIER|ASB11|ENSG00000165192|Transcript|ENST00000380470.7|protein_coding||1/6||||||||rs1273846218||-1||HGNC|HGNC:17186||1|||||||||||||||||||||||||||0.705|-0.158114|0.868|,T|intron_vari…	N	N	0.705	0.868	N	N
X	15303119	.	T	C	T	C	0.00048216	0.486308	N	N	N	N	N	0.0003125	0	0.00290698	0	0	0	0	0	0	0	0	0	0	0	CSQ=C|intron_variant|MODIFIER|ASB11|ENSG00000165192|Transcript|ENST00000344384.8|protein_coding||1/6||||||||rs998633244||-1||HGNC|HGNC:17186||5|A1||||||||||||||||||||||||||0.435|-0.231152|0.868|,C|intron_variant|MODIFIER|ASB11|ENSG00000165192|Transcript|ENST00000380470.7|protein_coding||1/6||||||||rs998633244||-1||HGNC|HGNC:17186||1|||||||||||||||||||||||||||0.435|-0.231152|0.868|,C|intron_varian…	N	N	0.435	0.868	N	N
X	15303136	rs183364991	G	T	G	T	0.0002649	0.513692	0	0	0.00099701	0	0	0.00099701	N	N	N	N	N	N	N	N	N	N	N	N	N	CSQ=T|intron_variant|MODIFIER|ASB11|ENSG00000165192|Transcript|ENST00000344384.8|protein_coding||1/6||||||||rs183364991||-1||HGNC|HGNC:17186||5|A1|||0.0003|0.001|0|0|0|0||||||||||||||||||1.559|-0.022183|0.868|,T|intron_variant|MODIFIER|ASB11|ENSG00000165192|Transcript|ENST00000380470.7|protein_coding||1/6||||||||rs183364991||-1||HGNC|HGNC:17186||1||||0.0003|0.001|0|0|0|0||||||||||||||||||1.559|-0…	N	N	1.559	0.868	N	N
X	15303213	.	C	T	C	T	0.0007947	0.513692	0	0	0.00299103	0	0	0.00299103	N	N	N	N	N	N	N	N	N	N	N	N	N	CSQ=T|intron_variant|MODIFIER|ASB11|ENSG00000165192|Transcript|ENST00000344384.8|protein_coding||1/6||||||||rs760205146||-1||HGNC|HGNC:17186||5|A1|||0.0008|||||||||||||||||||||||0.213|-0.326804|0.868|,T|intron_variant|MODIFIER|ASB11|ENSG00000165192|Transcript|ENST00000380470.7|protein_coding||1/6||||||||rs760205146||-1||HGNC|HGNC:17186||1||||0.0008|||||||||||||||||||||||0.213|-0.326804|0.868|,T|i…	N	N	0.213	0.868	N	N
X	15303227	.	TGAA	T	T	T	0.00072324	0.486308	N	N	N	N	N	0.0009375	0	0	0	0	0	0	0.00408719	0	0	0	0	0	0	CSQ=-|intron_variant|MODIFIER|ASB11|ENSG00000165192|Transcript|ENST00000344384.8|protein_coding||1/6||||||||||-1||HGNC|HGNC:17186||5|A1||||||||||||||||||||||||||||0.868|,-|intron_variant|MODIFIER|ASB11|ENSG00000165192|Transcript|ENST00000380470.7|protein_coding||1/6||||||||||-1||HGNC|HGNC:17186||1|||||||||||||||||||||||||||||0.868|,-|intron_variant|MODIFIER|ASB11|ENSG00000165192|Transcript|ENST00…	N	N	N	0.868	N	N
X	15303238	.	C	A	C	A	0.00024108	0.486308	N	N	N	N	N	0.0003125	0	0	0	0	0	0	0.0013624	0	0	0	0	0	0	CSQ=A|intron_variant|MODIFIER|ASB11|ENSG00000165192|Transcript|ENST00000344384.8|protein_coding||1/6||||||||||-1||HGNC|HGNC:17186||5|A1||||||||||||||||||||||||||2.429|0.068111|0.868|,A|intron_variant|MODIFIER|ASB11|ENSG00000165192|Transcript|ENST00000380470.7|protein_coding||1/6||||||||||-1||HGNC|HGNC:17186||1|||||||||||||||||||||||||||2.429|0.068111|0.868|,A|intron_variant|MODIFIER|ASB11|ENSG000…	N	N	2.429	0.868	N	N
X	15303276	.	C	T	C	T	0.0002649	0.513692	0	0	0.00099701	0	0	0.00099701	N	N	N	N	N	N	N	N	N	N	N	N	N	CSQ=T|intron_variant|MODIFIER|ASB11|ENSG00000165192|Transcript|ENST00000344384.8|protein_coding||1/6||||||||rs765954607||-1||HGNC|HGNC:17186||5|A1|||0.0003|||||||||||||||||||||||2.021|0.028728|0.868|,T|intron_variant|MODIFIER|ASB11|ENSG00000165192|Transcript|ENST00000380470.7|protein_coding||1/6||||||||rs765954607||-1||HGNC|HGNC:17186||1||||0.0003|||||||||||||||||||||||2.021|0.028728|0.868|,T|int…	N	N	2.021	0.868	N	N
X	15303277	.	G	A	A	A	0.00024108	0.486308	N	N	N	N	N	0.0003125	0	0	0	0	0	0	0	0	0.0263158	0	0	0	0	CSQ=A|intron_variant|MODIFIER|ASB11|ENSG00000165192|Transcript|ENST00000344384.8|protein_coding||1/6||||||||rs1335251583||-1||HGNC|HGNC:17186||5|A1||||||||||||||||||||||||||0.114|-0.406084|0.868|,A|intron_variant|MODIFIER|ASB11|ENSG00000165192|Transcript|ENST00000380470.7|protein_coding||1/6||||||||rs1335251583||-1||HGNC|HGNC:17186||1|||||||||||||||||||||||||||0.114|-0.406084|0.868|,A|intron_vari…	N	N	0.114	0.868	N	N
X	15303329	rs188059017	A	G	A	G	0.0002649	0.513692	0.0013089	0	0	0	0	0	N	N	N	N	N	N	N	N	N	N	N	N	N	CSQ=G|intron_variant|MODIFIER|ASB11|ENSG00000165192|Transcript|ENST00000344384.8|protein_coding||1/6||||||||rs188059017||-1||HGNC|HGNC:17186||5|A1|||0.0003|0|0|0.0013|0|0||||||||||||||||||2.445|0.069582|0.868|,G|intron_variant|MODIFIER|ASB11|ENSG00000165192|Transcript|ENST00000380470.7|protein_coding||1/6||||||||rs188059017||-1||HGNC|HGNC:17186||1||||0.0003|0|0|0.0013|0|0||||||||||||||||||2.445|0…	N	N	2.445	0.868	N	N
X	15303370	rs190585218	C	T	C	T	0.0002649	0.513692	0	0	0.00099701	0	0	0.00099701	N	N	N	N	N	N	N	N	N	N	N	N	N	CSQ=T|intron_variant|MODIFIER|ASB11|ENSG00000165192|Transcript|ENST00000344384.8|protein_coding||1/6||||||||rs190585218||-1||HGNC|HGNC:17186||5|A1|||0.0003|0.001|0|0|0|0||||||||||||||||||0.257|-0.302613|0.868|,T|intron_variant|MODIFIER|ASB11|ENSG00000165192|Transcript|ENST00000380470.7|protein_coding||1/6||||||||rs190585218||-1||HGNC|HGNC:17186||1||||0.0003|0.001|0|0|0|0||||||||||||||||||0.257|-0…	N	N	0.257	0.868	N	N
X	15303379	rs139349712	T	C	T	C	0.0233497	0	0	0	0.0558325	0.00954198	0	0.0354509	0.0248963	0.0901163	0.0130719	0.0185185	0	0.097561	0	0.0362473	0	0.0341556	0.0167364	0.0413793	0	CSQ=C|intron_variant|MODIFIER|ASB11|ENSG00000165192|Transcript|ENST00000344384.8|protein_coding||1/6||||||||rs139349712||-1||HGNC|HGNC:17186||5|A1|||0.0162|0.0558|0.0095|0|0|0||||||||||||||||||2.813|0.101727|0.868|,C|intron_variant|MODIFIER|ASB11|ENSG00000165192|Transcript|ENST00000380470.7|protein_coding||1/6||||||||rs139349712||-1||HGNC|HGNC:17186||1||||0.0162|0.0558|0.0095|0|0|0|||||||||||||||…	N	N	2.813	0.868	N	N
X	15303382	.	G	A	G	A	0.0007947	0.513692	0	0	0	0	0.00417827	0	N	N	N	N	N	N	N	N	N	N	N	N	N	CSQ=A|intron_variant|MODIFIER|ASB11|ENSG00000165192|Transcript|ENST00000344384.8|protein_coding||1/6||||||||rs751843011||-1||HGNC|HGNC:17186||5|A1|||0.0008|||||||||||||||||||||||1.789|0.004220|0.868|,A|intron_variant|MODIFIER|ASB11|ENSG00000165192|Transcript|ENST00000380470.7|protein_coding||1/6||||||||rs751843011||-1||HGNC|HGNC:17186||1||||0.0008|||||||||||||||||||||||1.789|0.004220|0.868|,A|int…	N	N	1.789	0.868	N	N
X	15303398	.	G	T	G	T	0.00075729	0	0	0	0.00099701	0	0	0.00023793	0	0	0	0	0	0	0	0	0	0	0	0	0	CSQ=T|intron_variant|MODIFIER|ASB11|ENSG00000165192|Transcript|ENST00000344384.8|protein_coding||1/6||||||||rs757825078||-1||HGNC|HGNC:17186||5|A1|||0.0003|||||||||||||||||||||||1.594|-0.018009|0.868|,T|intron_variant|MODIFIER|ASB11|ENSG00000165192|Transcript|ENST00000380470.7|protein_coding||1/6||||||||rs757825078||-1||HGNC|HGNC:17186||1||||0.0003|||||||||||||||||||||||1.594|-0.018009|0.868|,T|i…	N	N	1.594	0.868	N	N
X	15303431	.	C	T	C	T	0.0002649	0.513692	0	0	0	0.0019084	0	0	N	N	N	N	N	N	N	N	N	N	N	N	N	CSQ=T|intron_variant|MODIFIER|ASB11|ENSG00000165192|Transcript|ENST00000344384.8|protein_coding||1/6||||||||rs781652574||-1||HGNC|HGNC:17186||5|A1|||0.0003|||||||||||||||||||||||0.170|-0.355763|0.868|,T|intron_variant|MODIFIER|ASB11|ENSG00000165192|Transcript|ENST00000380470.7|protein_coding||1/6||||||||rs781652574||-1||HGNC|HGNC:17186||1||||0.0003|||||||||||||||||||||||0.170|-0.355763|0.868|,T|i…	N	N	0.17	0.868	N	N
X	15303469	.	GT	G	G	G	0.00096432	0.486308	N	N	N	N	N	0.00125	0	0	0.0196078	0	0	0	0	0	0	0	0	0.00689655	0	CSQ=-|intron_variant|MODIFIER|ASB11|ENSG00000165192|Transcript|ENST00000344384.8|protein_coding||1/6||||||||rs980310259||-1||HGNC|HGNC:17186||5|A1||||||||||||||||||||||||||0.154|-0.368565|0.868|,-|intron_variant|MODIFIER|ASB11|ENSG00000165192|Transcript|ENST00000380470.7|protein_coding||1/6||||||||rs980310259||-1||HGNC|HGNC:17186||1|||||||||||||||||||||||||||0.154|-0.368565|0.868|,-|intron_varian…	N	N	0.154	0.868	N	N
X	15303500	.	A	T	A	T	0.00048216	0.486308	N	N	N	N	N	0	0	0	0	0	0	0	0	0	0	0	0	0	0	CSQ=T|intron_variant|MODIFIER|ASB11|ENSG00000165192|Transcript|ENST00000344384.8|protein_coding||1/6||||||||||-1||HGNC|HGNC:17186||5|A1||||||||||||||||||||||||||2.260|0.052357|0.868|,T|intron_variant|MODIFIER|ASB11|ENSG00000165192|Transcript|ENST00000380470.7|protein_coding||1/6||||||||||-1||HGNC|HGNC:17186||1|||||||||||||||||||||||||||2.260|0.052357|0.868|,T|intron_variant|MODIFIER|ASB11|ENSG000…	N	N	2.26	0.868	N	N
X	15303564	rs145391252	T	G	T	G	0.00542724	0	0	0	0.0119641	0	0	0.00808946	0.00829876	0.0145349	0	0	0.00826446	0	0	0.0191898	0.0263158	0	0	0.0275862	0	CSQ=G|intron_variant|MODIFIER|ASB11|ENSG00000165192|Transcript|ENST00000344384.8|protein_coding||1/6||||||||rs145391252||-1||HGNC|HGNC:17186||5|A1|||0.0032|0.012|0|0|0|0||||||||||||||||||0.188|-0.342730|0.868|,G|intron_variant|MODIFIER|ASB11|ENSG00000165192|Transcript|ENST00000380470.7|protein_coding||1/6||||||||rs145391252||-1||HGNC|HGNC:17186||1||||0.0032|0.012|0|0|0|0||||||||||||||||||0.188|-0…	N	N	0.188	0.868	N	N
X	15303614	.	T	C	T	C	0.00024108	0.486308	N	N	N	N	N	0.0003125	0	0	0	0	0	0	0.0013624	0	0	0	0	0	0	CSQ=C|intron_variant|MODIFIER|ASB11|ENSG00000165192|Transcript|ENST00000344384.8|protein_coding||1/6||||||||||-1||HGNC|HGNC:17186||5|A1||||||||||||||||||||||||||2.983|0.115835|0.868|,C|intron_variant|MODIFIER|ASB11|ENSG00000165192|Transcript|ENST00000380470.7|protein_coding||1/6||||||||||-1||HGNC|HGNC:17186||1|||||||||||||||||||||||||||2.983|0.115835|0.868|,C|intron_variant|MODIFIER|ASB11|ENSG000…	N	N	2.983	0.868	N	N
X	15303646	.	T	G	T	G	0.0002649	0.513692	0.0013089	0	0	0	0	0	N	N	N	N	N	N	N	N	N	N	N	N	N	CSQ=G|intron_variant|MODIFIER|ASB11|ENSG00000165192|Transcript|ENST00000344384.8|protein_coding||1/6||||||||rs756117062||-1||HGNC|HGNC:17186||5|A1|||0.0003|||||||||||||||||||||||1.227|-0.065490|0.868|,G|intron_variant|MODIFIER|ASB11|ENSG00000165192|Transcript|ENST00000380470.7|protein_coding||1/6||||||||rs756117062||-1||HGNC|HGNC:17186||1||||0.0003|||||||||||||||||||||||1.227|-0.065490|0.868|,G|i…	N	N	1.227	0.868	N	N
X	15303736	rs6628964	G	A	A	A	0.418402	0	0.422775	0.39295	0.371884	0.312977	0.633705	0.40019	0.460581	0.311047	0.496732	0.333333	0.471074	0.378049	0.426431	0.223881	0.473684	0.419355	0.623431	0.531034	0.490566	CSQ=A|intron_variant|MODIFIER|ASB11|ENSG00000165192|Transcript|ENST00000344384.8|protein_coding||1/6||||||||rs6628964||-1||HGNC|HGNC:17186||5|A1|||0.4281|0.3719|0.313|0.4228|0.393|0.6337||||||||||||||||||2.128|0.039508|0.868|,A|intron_variant|MODIFIER|ASB11|ENSG00000165192|Transcript|ENST00000380470.7|protein_coding||1/6||||||||rs6628964||-1||HGNC|HGNC:17186||1||||0.4281|0.3719|0.313|0.4228|0.393…	N	N	2.128	0.868	N	N
X	15303771	rs16979814	A	G	A	G	0.0233497	0	0	0	0.0578265	0.00954198	0	0.0352129	0.0248963	0.0901163	0.0130719	0.0185185	0	0.097561	0	0.0362473	0	0.0322581	0.0167364	0.0275862	0	CSQ=G|intron_variant|MODIFIER|ASB11|ENSG00000165192|Transcript|ENST00000344384.8|protein_coding||1/6||||||||rs16979814||-1||HGNC|HGNC:17186||5|A1|||0.0167|0.0578|0.0095|0|0|0||||||||||||||||||1.217|-0.066978|0.868|,G|intron_variant|MODIFIER|ASB11|ENSG00000165192|Transcript|ENST00000380470.7|protein_coding||1/6||||||||rs16979814||-1||HGNC|HGNC:17186||1||||0.0167|0.0578|0.0095|0|0|0||||||||||||||||…	N	N	1.217	0.868	N	N
X	15303774	.	G	T	G	T	0.00024108	0.486308	N	N	N	N	N	0.0003125	0	0	0	0	0.00826446	0	0	0	0	0	0	0	0	CSQ=T|intron_variant|MODIFIER|ASB11|ENSG00000165192|Transcript|ENST00000344384.8|protein_coding||1/6||||||||||-1||HGNC|HGNC:17186||5|A1||||||||||||||||||||||||||1.257|-0.061238|0.868|,T|intron_variant|MODIFIER|ASB11|ENSG00000165192|Transcript|ENST00000380470.7|protein_coding||1/6||||||||||-1||HGNC|HGNC:17186||1|||||||||||||||||||||||||||1.257|-0.061238|0.868|,T|intron_variant|MODIFIER|ASB11|ENSG0…	N	N	1.257	0.868	N	N
X	15303803	rs183142940	C	T	C	T	0.0005298	0.513692	0	0	0	0.00381679	0	0	N	N	N	N	N	N	N	N	N	N	N	N	N	CSQ=T|intron_variant|MODIFIER|ASB11|ENSG00000165192|Transcript|ENST00000344384.8|protein_coding||1/6||||||||rs183142940||-1||HGNC|HGNC:17186||5|A1|||0.0005|0|0.0038|0|0|0||||||||||||||||||1.178|-0.072632|0.868|,T|intron_variant|MODIFIER|ASB11|ENSG00000165192|Transcript|ENST00000380470.7|protein_coding||1/6||||||||rs183142940||-1||HGNC|HGNC:17186||1||||0.0005|0|0.0038|0|0|0||||||||||||||||||1.178|…	N	N	1.178	0.868	N	N
X	15303804	.	G	A	A	A	0.00024108	0.486308	N	N	N	N	N	0.0003125	0	0	0	0	0	0.0121951	0	0	0	0	0	0	0	CSQ=A|intron_variant|MODIFIER|ASB11|ENSG00000165192|Transcript|ENST00000344384.8|protein_coding||1/6||||||||rs1038097084||-1||HGNC|HGNC:17186||5|A1||||||||||||||||||||||||||0.973|-0.105491|0.868|,A|intron_variant|MODIFIER|ASB11|ENSG00000165192|Transcript|ENST00000380470.7|protein_coding||1/6||||||||rs1038097084||-1||HGNC|HGNC:17186||1|||||||||||||||||||||||||||0.973|-0.105491|0.868|,A|intron_vari…	N	N	0.973	0.868	N	N
X	15303827	.	T	C	T	C	0.0002649	0.513692	0	0	0.00099701	0	0	0.00099701	N	N	N	N	N	N	N	N	N	N	N	N	N	CSQ=C|intron_variant|MODIFIER|ASB11|ENSG00000165192|Transcript|ENST00000344384.8|protein_coding||1/6||||||||rs774241608||-1||HGNC|HGNC:17186||5|A1|||0.0003|||||||||||||||||||||||4.173|0.208508|0.868|,C|intron_variant|MODIFIER|ASB11|ENSG00000165192|Transcript|ENST00000380470.7|protein_coding||1/6||||||||rs774241608||-1||HGNC|HGNC:17186||1||||0.0003|||||||||||||||||||||||4.173|0.208508|0.868|,C|int…	N	N	4.173	0.868	N	N
X	15303834	.	TTAA	T	T	T	0.00048216	0.486308	N	N	N	N	N	0.000625	0	0	0	0.0185185	0	0	0.0013624	0	0	0	0	0	0	CSQ=-|intron_variant|MODIFIER|ASB11|ENSG00000165192|Transcript|ENST00000344384.8|protein_coding||1/6||||||||||-1||HGNC|HGNC:17186||5|A1||||||||||||||||||||||||||||0.868|,-|intron_variant|MODIFIER|ASB11|ENSG00000165192|Transcript|ENST00000380470.7|protein_coding||1/6||||||||||-1||HGNC|HGNC:17186||1|||||||||||||||||||||||||||||0.868|,-|intron_variant|MODIFIER|ASB11|ENSG00000165192|Transcript|ENST00…	N	N	N	0.868	N	N
X	15303865	.	A	G	A	G	0.0007947	0.513692	0.0039267	0	0	0	0	0	N	N	N	N	N	N	N	N	N	N	N	N	N	CSQ=G|intron_variant|MODIFIER|ASB11|ENSG00000165192|Transcript|ENST00000344384.8|protein_coding||1/6||||||||rs747944502||-1||HGNC|HGNC:17186||5|A1|||0.0008|||||||||||||||||||||||4.368|0.223738|0.868|,G|intron_variant|MODIFIER|ASB11|ENSG00000165192|Transcript|ENST00000380470.7|protein_coding||1/6||||||||rs747944502||-1||HGNC|HGNC:17186||1||||0.0008|||||||||||||||||||||||4.368|0.223738|0.868|,G|int…	N	N	4.368	0.868	N	N
X	15303884	.	G	A	G	A	0.0005298	0.513692	0.0013089	0	0.00099701	0	0	0.00099701	N	N	N	N	N	N	N	N	N	N	N	N	N	CSQ=A|intron_variant|MODIFIER|ASB11|ENSG00000165192|Transcript|ENST00000344384.8|protein_coding||1/6||||||||rs772149642||-1||HGNC|HGNC:17186||5|A1|||0.0005|||||||||||||||||||||||3.132|0.127873|0.868|,A|intron_variant|MODIFIER|ASB11|ENSG00000165192|Transcript|ENST00000380470.7|protein_coding||1/6||||||||rs772149642||-1||HGNC|HGNC:17186||1||||0.0005|||||||||||||||||||||||3.132|0.127873|0.868|,A|int…	N	N	3.132	0.868	N	N
X	15303925	.	C	T	C	T	0.00238411	0.513692	0	0	0	0	0.0125348	0	N	N	N	N	N	N	N	N	N	N	N	N	N	CSQ=T|intron_variant|MODIFIER|ASB11|ENSG00000165192|Transcript|ENST00000344384.8|protein_coding||1/6||||||||rs773219546||-1||HGNC|HGNC:17186||5|A1|||0.0024|||||||||||||||||||||||1.412|-0.040487|0.868|,T|intron_variant|MODIFIER|ASB11|ENSG00000165192|Transcript|ENST00000380470.7|protein_coding||1/6||||||||rs773219546||-1||HGNC|HGNC:17186||1||||0.0024|||||||||||||||||||||||1.412|-0.040487|0.868|,T|i…	N	N	1.412	0.868	N	N
X	15303932	rs140259454	A	G	A	G	0.00126215	0	0	0	0.00299103	0	0	0.00237925	0.0124481	0.00872093	0	0	0	0	0	0	0	0	0	0.00689655	0	CSQ=G|intron_variant|MODIFIER|ASB11|ENSG00000165192|Transcript|ENST00000344384.8|protein_coding||1/6||||||||rs140259454||-1||HGNC|HGNC:17186||5|A1|||0.0008|0.003|0|0|0|0||||||||||||||||||2.490|0.073656|0.868|,G|intron_variant|MODIFIER|ASB11|ENSG00000165192|Transcript|ENST00000380470.7|protein_coding||1/6||||||||rs140259454||-1||HGNC|HGNC:17186||1||||0.0008|0.003|0|0|0|0||||||||||||||||||2.490|0.0…	N	N	2.49	0.868	N	N
X	15303958	.	G	A	G	A	0.0002649	0.513692	0	0	0	0	0.00139276	0	N	N	N	N	N	N	N	N	N	N	N	N	N	CSQ=A|intron_variant|MODIFIER|ASB11|ENSG00000165192|Transcript|ENST00000344384.8|protein_coding||1/6||||||||rs765866935||-1||HGNC|HGNC:17186||5|A1|||0.0003|||||||||||||||||||||||5.601|0.326527|0.868|,A|intron_variant|MODIFIER|ASB11|ENSG00000165192|Transcript|ENST00000380470.7|protein_coding||1/6||||||||rs765866935||-1||HGNC|HGNC:17186||1||||0.0003|||||||||||||||||||||||5.601|0.326527|0.868|,A|int…	N	N	5.601	0.868	N	N
X	15303999	.	T	C	T	C	0.00192864	0.486308	N	N	N	N	N	0.0025	0	0	0.0457516	0	0	0	0	0	0	0	0	0.00689655	0	CSQ=C|intron_variant|MODIFIER|ASB11|ENSG00000165192|Transcript|ENST00000344384.8|protein_coding||1/6||||||||||-1||HGNC|HGNC:17186||5|A1||||||||||||||||||||||||||0.520|-0.205143|0.868|,C|intron_variant|MODIFIER|ASB11|ENSG00000165192|Transcript|ENST00000380470.7|protein_coding||1/6||||||||||-1||HGNC|HGNC:17186||1|||||||||||||||||||||||||||0.520|-0.205143|0.868|,C|intron_variant|MODIFIER|ASB11|ENSG0…	N	N	0.52	0.868	N	N
X	15304102	.	A	G	A	G	0.00024108	0.486308	N	N	N	N	N	0	0	0	0	0	0	0	0	0	0	0	0	0	0	CSQ=G|intron_variant|MODIFIER|ASB11|ENSG00000165192|Transcript|ENST00000344384.8|protein_coding||1/6||||||||||-1||HGNC|HGNC:17186||5|A1||||||||||||||||||||||||||3.540|0.159826|0.868|,G|intron_variant|MODIFIER|ASB11|ENSG00000165192|Transcript|ENST00000380470.7|protein_coding||1/6||||||||||-1||HGNC|HGNC:17186||1|||||||||||||||||||||||||||3.540|0.159826|0.868|,G|intron_variant|MODIFIER|ASB11|ENSG000…	N	N	3.54	0.868	N	N
X	15304105	.	G	T	G	T	0.00024108	0.486308	N	N	N	N	N	0.0003125	0.00414938	0	0	0	0	0	0	0	0	0	0	0	0	CSQ=T|intron_variant|MODIFIER|ASB11|ENSG00000165192|Transcript|ENST00000344384.8|protein_coding||1/6||||||||rs1319503953||-1||HGNC|HGNC:17186||5|A1||||||||||||||||||||||||||0.668|-0.166760|0.868|,T|intron_variant|MODIFIER|ASB11|ENSG00000165192|Transcript|ENST00000380470.7|protein_coding||1/6||||||||rs1319503953||-1||HGNC|HGNC:17186||1|||||||||||||||||||||||||||0.668|-0.166760|0.868|,T|intron_vari…	N	N	0.668	0.868	N	N
X	15304179	rs56075342	G	A	G	A	0.0128739	0	0	0	0.0578265	0.00381679	0	0.0206995	0.00414938	0.0116279	0.00653595	0	0.00826446	0.0121951	0	0.0021322	0	0.0056926	0.0711297	0	0	CSQ=A|intron_variant|MODIFIER|ASB11|ENSG00000165192|Transcript|ENST00000344384.8|protein_coding||1/6||||||||rs56075342||-1||HGNC|HGNC:17186||5|A1|||0.0159|0.0578|0.0038|0|0|0||||||||||||||||||0.378|-0.251011|0.868|,A|intron_variant|MODIFIER|ASB11|ENSG00000165192|Transcript|ENST00000380470.7|protein_coding||1/6||||||||rs56075342||-1||HGNC|HGNC:17186||1||||0.0159|0.0578|0.0038|0|0|0||||||||||||||||…	N	N	0.378	0.868	N	N
X	15304226	.	G	A	G	A	0.0002649	0.513692	0	0	0	0	0.00139276	0	N	N	N	N	N	N	N	N	N	N	N	N	N	CSQ=A|intron_variant|MODIFIER|ASB11|ENSG00000165192|Transcript|ENST00000344384.8|protein_coding||1/6||||||||rs759277106||-1||HGNC|HGNC:17186||5|A1|||0.0003|||||||||||||||||||||||1.690|-0.006848|0.868|,A|intron_variant|MODIFIER|ASB11|ENSG00000165192|Transcript|ENST00000380470.7|protein_coding||1/6||||||||rs759277106||-1||HGNC|HGNC:17186||1||||0.0003|||||||||||||||||||||||1.690|-0.006848|0.868|,A|i…	N	N	1.69	0.868	N	N
X	15304227	.	C	A	C	A	0.0002649	0.513692	0	0.00130548	0	0	0	0	N	N	N	N	N	N	N	N	N	N	N	N	N	CSQ=A|intron_variant|MODIFIER|ASB11|ENSG00000165192|Transcript|ENST00000344384.8|protein_coding||1/6||||||||rs764796483||-1||HGNC|HGNC:17186||5|A1|||0.0003|||||||||||||||||||||||1.366|-0.046472|0.868|,A|intron_variant|MODIFIER|ASB11|ENSG00000165192|Transcript|ENST00000380470.7|protein_coding||1/6||||||||rs764796483||-1||HGNC|HGNC:17186||1||||0.0003|||||||||||||||||||||||1.366|-0.046472|0.868|,A|i…	N	N	1.366	0.868	N	N
X	15304373	rs187065872	G	A	G	A	0.0005298	0.513692	0	0.00261097	0	0	0	0	N	N	N	N	N	N	N	N	N	N	N	N	N	CSQ=A|intron_variant|MODIFIER|ASB11|ENSG00000165192|Transcript|ENST00000344384.8|protein_coding||1/6||||||||rs187065872&COSV60354455||-1||HGNC|HGNC:17186||5|A1|||0.0005|0|0|0|0.0026|0|||||||||||0&1|0&1||||||0.043|-0.524812|0.868|,A|intron_variant|MODIFIER|ASB11|ENSG00000165192|Transcript|ENST00000380470.7|protein_coding||1/6||||||||rs187065872&COSV60354455||-1||HGNC|HGNC:17186||1||||0.0005|0|0|0|…	N	N	0.043	0.868	N	N
X	15304387	rs192737035	A	G	A	G	0.0002649	0.513692	0	0	0	0.0019084	0	0	N	N	N	N	N	N	N	N	N	N	N	N	N	CSQ=G|intron_variant|MODIFIER|ASB11|ENSG00000165192|Transcript|ENST00000344384.8|protein_coding||1/6||||||||rs192737035||-1||HGNC|HGNC:17186||5|A1|||0.0003|0|0.0019|0|0|0||||||||||||||||||12.79|1.062086|0.868|,G|intron_variant|MODIFIER|ASB11|ENSG00000165192|Transcript|ENST00000380470.7|protein_coding||1/6||||||||rs192737035||-1||HGNC|HGNC:17186||1||||0.0003|0|0.0019|0|0|0||||||||||||||||||12.79|1…	N	N	12.79	0.868	N	N
X	15304393	rs184287988	G	A	G	A	0.0002649	0.513692	0.0013089	0	0	0	0	0	N	N	N	N	N	N	N	N	N	N	N	N	N	CSQ=A|intron_variant|MODIFIER|ASB11|ENSG00000165192|Transcript|ENST00000344384.8|protein_coding||1/6||||||||rs184287988||-1||HGNC|HGNC:17186||5|A1|||0.0003|0|0|0.0013|0|0||||||||||||||||||2.124|0.039086|0.868|,A|intron_variant|MODIFIER|ASB11|ENSG00000165192|Transcript|ENST00000380470.7|protein_coding||1/6||||||||rs184287988||-1||HGNC|HGNC:17186||1||||0.0003|0|0|0.0013|0|0||||||||||||||||||2.124|0…	N	N	2.124	0.868	N	N
X	15304427	.	T	C	T	C	0.0002649	0.513692	0	0.00130548	0	0	0	0	N	N	N	N	N	N	N	N	N	N	N	N	N	CSQ=C|intron_variant|MODIFIER|ASB11|ENSG00000165192|Transcript|ENST00000344384.8|protein_coding||1/6||||||||rs750886526||-1||HGNC|HGNC:17186||5|A1|||0.0003|||||||||||||||||||||||6.921|0.455786|0.868|,C|intron_variant|MODIFIER|ASB11|ENSG00000165192|Transcript|ENST00000380470.7|protein_coding||1/6||||||||rs750886526||-1||HGNC|HGNC:17186||1||||0.0003|||||||||||||||||||||||6.921|0.455786|0.868|,C|int…	N	N	6.921	0.868	N	N
X	15304464	.	T	C	T	C	0.00192864	0.486308	N	N	N	N	N	0.0025	0	0	0.0457516	0	0	0	0	0	0	0	0	0.00689655	0	CSQ=C|intron_variant|MODIFIER|ASB11|ENSG00000165192|Transcript|ENST00000344384.8|protein_coding||1/6||||||||||-1||HGNC|HGNC:17186||5|A1||||||||||||||||||||||||||2.445|0.069573|0.868|,C|intron_variant|MODIFIER|ASB11|ENSG00000165192|Transcript|ENST00000380470.7|protein_coding||1/6||||||||||-1||HGNC|HGNC:17186||1|||||||||||||||||||||||||||2.445|0.069573|0.868|,C|intron_variant|MODIFIER|ASB11|ENSG000…	N	N	2.445	0.868	N	N
X	15304466	.	C	T	C	T	0.00024108	0.486308	N	N	N	N	N	0.0003125	0	0	0	0	0	0	0.0013624	0	0	0	0	0	0	CSQ=T|intron_variant|MODIFIER|ASB11|ENSG00000165192|Transcript|ENST00000344384.8|protein_coding||1/6||||||||rs1049413672||-1||HGNC|HGNC:17186||5|A1||||||||||||||||||||||||||1.070|-0.089348|0.868|,T|intron_variant|MODIFIER|ASB11|ENSG00000165192|Transcript|ENST00000380470.7|protein_coding||1/6||||||||rs1049413672||-1||HGNC|HGNC:17186||1|||||||||||||||||||||||||||1.070|-0.089348|0.868|,T|intron_vari…	N	N	1.07	0.868	N	N
X	15304474	rs187607346	C	T	C	T	0.00025243	0	0	0	0	0.0019084	0	0.00023793	0	0	0	0	0	0	0.0013624	0	0	0	0	0	0	CSQ=T|intron_variant|MODIFIER|ASB11|ENSG00000165192|Transcript|ENST00000344384.8|protein_coding||1/6||||||||rs187607346||-1||HGNC|HGNC:17186||5|A1|||0.0003|0|0.0019|0|0|0||||||||||||||||||2.913|0.110064|0.868|,T|intron_variant|MODIFIER|ASB11|ENSG00000165192|Transcript|ENST00000380470.7|protein_coding||1/6||||||||rs187607346||-1||HGNC|HGNC:17186||1||||0.0003|0|0.0019|0|0|0||||||||||||||||||2.913|0…	N	N	2.913	0.868	N	N
X	15304477	rs201290024	A	AT	A	AT	0.0138836	0	0.0170157	0	0	0	0.0153203	0.0192719	0.0124481	0.00290698	0.0392157	0.0185185	0	0.0487805	0.0190736	0.0746269	0.0263158	0.00948767	0.0125523	0.0206897	0.0943396	CSQ=T|intron_variant|MODIFIER|ASB11|ENSG00000165192|Transcript|ENST00000344384.8|protein_coding||1/6||||||||rs201290024||-1||HGNC|HGNC:17186||5|A1||||0|0|0.017|0|0.0153||||||||||||||||||0.864|-0.125284|0.868|,T|intron_variant|MODIFIER|ASB11|ENSG00000165192|Transcript|ENST00000380470.7|protein_coding||1/6||||||||rs201290024||-1||HGNC|HGNC:17186||1|||||0|0|0.017|0|0.0153||||||||||||||||||0.864|-0.1…	N	N	0.864	0.868	N	N
X	15304498	.	C	T	C	T	0.00100972	0	0	0.00130548	0.00299103	0	0	0.00166548	0	0	0	0	0	0	0.0013624	0	0.0789474	0	0	0	0	CSQ=T|intron_variant|MODIFIER|ASB11|ENSG00000165192|Transcript|ENST00000344384.8|protein_coding||1/6||||||||rs753830418||-1||HGNC|HGNC:17186||5|A1|||0.0011|||||||||||||||||||||||2.388|0.064340|0.868|,T|intron_variant|MODIFIER|ASB11|ENSG00000165192|Transcript|ENST00000380470.7|protein_coding||1/6||||||||rs753830418||-1||HGNC|HGNC:17186||1||||0.0011|||||||||||||||||||||||2.388|0.064340|0.868|,T|int…	N	N	2.388	0.868	N	N
X	15304555	rs192794717	G	A	G	A	0.0002649	0.513692	0	0	0	0.0019084	0	0	N	N	N	N	N	N	N	N	N	N	N	N	N	CSQ=A|intron_variant|MODIFIER|ASB11|ENSG00000165192|Transcript|ENST00000344384.8|protein_coding||1/6||||||||rs192794717||-1||HGNC|HGNC:17186||5|A1|||0.0003|0|0.0019|0|0|0||||||||||||||||||1.965|0.022970|0.868|,A|intron_variant|MODIFIER|ASB11|ENSG00000165192|Transcript|ENST00000380470.7|protein_coding||1/6||||||||rs192794717||-1||HGNC|HGNC:17186||1||||0.0003|0|0.0019|0|0|0||||||||||||||||||1.965|0…	N	N	1.965	0.868	N	N
X	15304557	.	A	G	A	G	0.00024108	0.486308	N	N	N	N	N	0.0003125	0	0	0	0	0.00826446	0	0	0	0	0	0	0	0	CSQ=G|intron_variant|MODIFIER|ASB11|ENSG00000165192|Transcript|ENST00000344384.8|protein_coding||1/6||||||||rs562118511||-1||HGNC|HGNC:17186||5|A1||||||||||||||||||||||||||3.835|0.182560|0.868|,G|intron_variant|MODIFIER|ASB11|ENSG00000165192|Transcript|ENST00000380470.7|protein_coding||1/6||||||||rs562118511||-1||HGNC|HGNC:17186||1|||||||||||||||||||||||||||3.835|0.182560|0.868|,G|intron_variant|…	N	N	3.835	0.868	N	N
X	15304594	.	T	C	T	C	0.0002649	0.513692	0.0013089	0	0	0	0	0	N	N	N	N	N	N	N	N	N	N	N	N	N	CSQ=C|intron_variant|MODIFIER|ASB11|ENSG00000165192|Transcript|ENST00000344384.8|protein_coding||1/6||||||||rs778945511||-1||HGNC|HGNC:17186||5|A1|||0.0003|||||||||||||||||||||||3.003|0.117461|0.868|,C|intron_variant|MODIFIER|ASB11|ENSG00000165192|Transcript|ENST00000380470.7|protein_coding||1/6||||||||rs778945511||-1||HGNC|HGNC:17186||1||||0.0003|||||||||||||||||||||||3.003|0.117461|0.868|,C|int…	N	N	3.003	0.868	N	N
X	15304618	rs184640537	G	A	G	A	0.0008835	0	0	0	0	0.0019084	0	0.00142755	0	0	0	0	0	0	0.0013624	0.010661	0	0	0	0	0	CSQ=A|intron_variant|MODIFIER|ASB11|ENSG00000165192|Transcript|ENST00000344384.8|protein_coding||1/6||||||||rs184640537||-1||HGNC|HGNC:17186||5|A1|||0.0003|0|0.0019|0|0|0||||||||||||||||||2.328|0.058762|0.868|,A|intron_variant|MODIFIER|ASB11|ENSG00000165192|Transcript|ENST00000380470.7|protein_coding||1/6||||||||rs184640537||-1||HGNC|HGNC:17186||1||||0.0003|0|0.0019|0|0|0||||||||||||||||||2.328|0…	N	N	2.328	0.868	N	N
X	15304621	.	T	C	T	C	0.0002649	0.513692	0	0	0	0	0.00139276	0	N	N	N	N	N	N	N	N	N	N	N	N	N	CSQ=C|intron_variant|MODIFIER|ASB11|ENSG00000165192|Transcript|ENST00000344384.8|protein_coding||1/6||||||||rs771955355||-1||HGNC|HGNC:17186||5|A1|||0.0003|||||||||||||||||||||||3.376|0.147132|0.868|,C|intron_variant|MODIFIER|ASB11|ENSG00000165192|Transcript|ENST00000380470.7|protein_coding||1/6||||||||rs771955355||-1||HGNC|HGNC:17186||1||||0.0003|||||||||||||||||||||||3.376|0.147132|0.868|,C|int…	N	N	3.376	0.868	N	N
X	15304653	.	G	A	G	A	0.00024108	0.486308	N	N	N	N	N	0	0	0	0	0	0	0	0	0	0	0	0	0	0	CSQ=A|intron_variant|MODIFIER|ASB11|ENSG00000165192|Transcript|ENST00000344384.8|protein_coding||1/6||||||||||-1||HGNC|HGNC:17186||5|A1||||||||||||||||||||||||||1.322|-0.052331|0.868|,A|intron_variant|MODIFIER|ASB11|ENSG00000165192|Transcript|ENST00000380470.7|protein_coding||1/6||||||||||-1||HGNC|HGNC:17186||1|||||||||||||||||||||||||||1.322|-0.052331|0.868|,A|intron_variant|MODIFIER|ASB11|ENSG0…	N	N	1.322	0.868	N	N
X	15304681	.	C	A	C	A	0.00626808	0.486308	N	N	N	N	N	0.006875	0.0207469	0.00872093	0	0.0555556	0.00826446	0	0.00953678	0	0	0	0	0.00689655	0.0377359	CSQ=A|intron_variant|MODIFIER|ASB11|ENSG00000165192|Transcript|ENST00000344384.8|protein_coding||1/6||||||||rs1049921052||-1||HGNC|HGNC:17186||5|A1||||||||||||||||||||||||||1.013|-0.098580|0.868|,A|intron_variant|MODIFIER|ASB11|ENSG00000165192|Transcript|ENST00000380470.7|protein_coding||1/6||||||||rs1049921052||-1||HGNC|HGNC:17186||1|||||||||||||||||||||||||||1.013|-0.098580|0.868|,A|intron_vari…	N	N	1.013	0.868	N	N
X	15304687	rs375735888	G	A	G	A	0.0010596	0.513692	0.0039267	0	0	0	0.00139276	0	N	N	N	N	N	N	N	N	N	N	N	N	N	CSQ=A|intron_variant|MODIFIER|ASB11|ENSG00000165192|Transcript|ENST00000344384.8|protein_coding||1/6||||||||rs375735888||-1||HGNC|HGNC:17186||5|A1|||0.0011|0|0|0.0039|0|0.0014||||||||||||||||||3.074|0.123227|0.868|,A|intron_variant|MODIFIER|ASB11|ENSG00000165192|Transcript|ENST00000380470.7|protein_coding||1/6||||||||rs375735888||-1||HGNC|HGNC:17186||1||||0.0011|0|0|0.0039|0|0.0014|||||||||||||||…	N	N	3.074	0.868	N	N
X	15304702	.	A	G	A	G	0.00211921	0.513692	0	0	0	0	0.0111421	0	N	N	N	N	N	N	N	N	N	N	N	N	N	CSQ=G|intron_variant|MODIFIER|ASB11|ENSG00000165192|Transcript|ENST00000344384.8|protein_coding||1/6||||||||rs746995962||-1||HGNC|HGNC:17186||5|A1|||0.0021|||||||||||||||||||||||6.757|0.438560|0.868|,G|intron_variant|MODIFIER|ASB11|ENSG00000165192|Transcript|ENST00000380470.7|protein_coding||1/6||||||||rs746995962||-1||HGNC|HGNC:17186||1||||0.0021|||||||||||||||||||||||6.757|0.438560|0.868|,G|int…	N	N	6.757	0.868	N	N
X	15304734	.	G	C	G	C	0.0034078	0	0	0	0	0.0019084	0	0.00523436	0.0207469	0.00872093	0	0.0555556	0.00826446	0	0.00953678	0	0	0	0	0.00689655	0.0377359	CSQ=C|intron_variant|MODIFIER|ASB11|ENSG00000165192|Transcript|ENST00000344384.8|protein_coding||1/6||||||||rs770746266||-1||HGNC|HGNC:17186||5|A1|||0.0003|||||||||||||||||||||||2.662|0.088835|0.868|,C|intron_variant|MODIFIER|ASB11|ENSG00000165192|Transcript|ENST00000380470.7|protein_coding||1/6||||||||rs770746266||-1||HGNC|HGNC:17186||1||||0.0003|||||||||||||||||||||||2.662|0.088835|0.868|,C|int…	N	N	2.662	0.868	N	N
X	15304744	.	G	A	A	A	0.0005298	0.513692	0	0	0	0.00381679	0	0	N	N	N	N	N	N	N	N	N	N	N	N	N	CSQ=A|intron_variant|MODIFIER|ASB11|ENSG00000165192|Transcript|ENST00000344384.8|protein_coding||1/6||||||||rs776275606||-1||HGNC|HGNC:17186||5|A1|||0.0005|||||||||||||||||||||||0.342|-0.264809|0.868|,A|intron_variant|MODIFIER|ASB11|ENSG00000165192|Transcript|ENST00000380470.7|protein_coding||1/6||||||||rs776275606||-1||HGNC|HGNC:17186||1||||0.0005|||||||||||||||||||||||0.342|-0.264809|0.868|,A|i…	N	N	0.342	0.868	N	N
X	15304782	.	G	A	G	A	0.00192864	0.486308	N	N	N	N	N	0.0025	0.00414938	0	0	0	0	0	0	0.0149254	0	0	0	0	0	CSQ=A|intron_variant|MODIFIER|ASB11|ENSG00000165192|Transcript|ENST00000344384.8|protein_coding||1/6||||||||rs1206457485||-1||HGNC|HGNC:17186||5|A1||||||||||||||||||||||||||4.322|0.220115|0.868|,A|intron_variant|MODIFIER|ASB11|ENSG00000165192|Transcript|ENST00000380470.7|protein_coding||1/6||||||||rs1206457485||-1||HGNC|HGNC:17186||1|||||||||||||||||||||||||||4.322|0.220115|0.868|,A|intron_varian…	N	N	4.322	0.868	N	N
X	15304789	.	C	T	C	T	0.0002649	0.513692	0	0	0	0.0019084	0	0	N	N	N	N	N	N	N	N	N	N	N	N	N	CSQ=T|intron_variant|MODIFIER|ASB11|ENSG00000165192|Transcript|ENST00000344384.8|protein_coding||1/6||||||||rs758952078||-1||HGNC|HGNC:17186||5|A1|||0.0003|||||||||||||||||||||||2.979|0.115529|0.868|,T|intron_variant|MODIFIER|ASB11|ENSG00000165192|Transcript|ENST00000380470.7|protein_coding||1/6||||||||rs758952078||-1||HGNC|HGNC:17186||1||||0.0003|||||||||||||||||||||||2.979|0.115529|0.868|,T|int…	N	N	2.979	0.868	N	N
X	15304790	.	G	A	G	A	0.00024108	0.486308	N	N	N	N	N	0.0003125	0	0	0	0	0	0	0.0013624	0	0	0	0	0	0	CSQ=A|intron_variant|MODIFIER|ASB11|ENSG00000165192|Transcript|ENST00000344384.8|protein_coding||1/6||||||||rs897077741||-1||HGNC|HGNC:17186||5|A1||||||||||||||||||||||||||3.719|0.173596|0.868|,A|intron_variant|MODIFIER|ASB11|ENSG00000165192|Transcript|ENST00000380470.7|protein_coding||1/6||||||||rs897077741||-1||HGNC|HGNC:17186||1|||||||||||||||||||||||||||3.719|0.173596|0.868|,A|intron_variant|…	N	N	3.719	0.868	N	N
X	15304797	.	C	T	C	T	0.00024108	0.486308	N	N	N	N	N	0.0003125	0	0	0	0	0	0.0121951	0	0	0	0	0	0	0	CSQ=T|intron_variant|MODIFIER|ASB11|ENSG00000165192|Transcript|ENST00000344384.8|protein_coding||1/6||||||||||-1||HGNC|HGNC:17186||5|A1||||||||||||||||||||||||||4.178|0.208883|0.868|,T|intron_variant|MODIFIER|ASB11|ENSG00000165192|Transcript|ENST00000380470.7|protein_coding||1/6||||||||||-1||HGNC|HGNC:17186||1|||||||||||||||||||||||||||4.178|0.208883|0.868|,T|intron_variant|MODIFIER|ASB11|ENSG000…	N	N	4.178	0.868	N	N
X	15304821	.	G	A	G	A	0.00048216	0.486308	N	N	N	N	N	0.000625	0	0	0	0	0	0	0.0027248	0	0	0	0	0	0	CSQ=A|intron_variant|MODIFIER|ASB11|ENSG00000165192|Transcript|ENST00000344384.8|protein_coding||1/6||||||||||-1||HGNC|HGNC:17186||5|A1||||||||||||||||||||||||||0.859|-0.126084|0.868|,A|intron_variant|MODIFIER|ASB11|ENSG00000165192|Transcript|ENST00000380470.7|protein_coding||1/6||||||||||-1||HGNC|HGNC:17186||1|||||||||||||||||||||||||||0.859|-0.126084|0.868|,A|intron_variant|MODIFIER|ASB11|ENSG0…	N	N	0.859	0.868	N	N
X	15304823	rs5935940	T	C	C	T	0.366149	0	0.557592	0.524804	0.313061	0.622137	0.229805	0.306448	0.365145	0.313953	0.248366	0.444444	0.0826446	0.195122	0.457766	0.0916844	0.368421	0.341556	0.221757	0.296552	0.396226	CSQ=C|intron_variant|MODIFIER|ASB11|ENSG00000165192|Transcript|ENST00000344384.8|protein_coding||1/6||||||||rs5935940||-1||HGNC|HGNC:17186||5|A1||||0.6869|0.3779|0.4424|0.4752|0.7702||||||||||||||||||0.914|-0.115918|0.868|,C|intron_variant|MODIFIER|ASB11|ENSG00000165192|Transcript|ENST00000380470.7|protein_coding||1/6||||||||rs5935940||-1||HGNC|HGNC:17186||1|||||0.6869|0.3779|0.4424|0.4752|0.7702…	N	N	0.914	0.868	N	N
X	15304835	.	A	T	A	T	0.0002649	0.513692	0	0	0	0.0019084	0	0	N	N	N	N	N	N	N	N	N	N	N	N	N	CSQ=T|intron_variant|MODIFIER|ASB11|ENSG00000165192|Transcript|ENST00000344384.8|protein_coding||1/6||||||||rs775054234||-1||HGNC|HGNC:17186||5|A1|||0.0003|||||||||||||||||||||||2.013|0.027885|0.868|,T|intron_variant|MODIFIER|ASB11|ENSG00000165192|Transcript|ENST00000380470.7|protein_coding||1/6||||||||rs775054234||-1||HGNC|HGNC:17186||1||||0.0003|||||||||||||||||||||||2.013|0.027885|0.868|,T|int…	N	N	2.013	0.868	N	N
X	15304847	rs140814611	C	G	C	G	0.0466995	0	0	0.00261097	0.0598205	0.00763359	0	0.0682846	0.0539419	0.0348837	0.117647	0.037037	0.0247934	0.0365854	0.0790191	0.110874	0.0526316	0.00948767	0.158996	0.103448	0.113208	CSQ=G|intron_variant|MODIFIER|ASB11|ENSG00000165192|Transcript|ENST00000344384.8|protein_coding||1/6||||||||rs140814611||-1||HGNC|HGNC:17186||5|A1|||0.0175|0.0598|0.0076|0|0.0026|0||||||||||||||||||0.609|-0.181089|0.868|,G|intron_variant|MODIFIER|ASB11|ENSG00000165192|Transcript|ENST00000380470.7|protein_coding||1/6||||||||rs140814611||-1||HGNC|HGNC:17186||1||||0.0175|0.0598|0.0076|0|0.0026|0||||…	N	N	0.609	0.868	N	N
X	15304936	rs12010915	G	T	G	T	0.0131263	0	0	0	0.0578265	0.00572519	0	0.0209374	0.00414938	0.0116279	0.00653595	0.0185185	0.00826446	0.0121951	0	0.0021322	0	0.0056926	0.0711297	0	0	CSQ=T|intron_variant|MODIFIER|ASB11|ENSG00000165192|Transcript|ENST00000344384.8|protein_coding||1/6||||||||rs12010915||-1||HGNC|HGNC:17186||5|A1|||0.0162|0.0578|0.0057|0|0|0||||||||||||||||||6.565|0.418731|0.868|,T|intron_variant|MODIFIER|ASB11|ENSG00000165192|Transcript|ENST00000380470.7|protein_coding||1/6||||||||rs12010915||-1||HGNC|HGNC:17186||1||||0.0162|0.0578|0.0057|0|0|0|||||||||||||||||…	N	N	6.565	0.868	N	N
X	15305053	rs138889546	G	A	G	A	0.00423841	0.513692	0.0209424	0	0	0	0	0	N	N	N	N	N	N	N	N	N	N	N	N	N	CSQ=A|intron_variant|MODIFIER|ASB11|ENSG00000165192|Transcript|ENST00000344384.8|protein_coding||1/6||||||||rs138889546||-1||HGNC|HGNC:17186||5|A1|||0.0042|0|0|0.0209|0|0||||||||||||||||||5.444|0.312612|0.868|,A|intron_variant|MODIFIER|ASB11|ENSG00000165192|Transcript|ENST00000380470.7|protein_coding||1/6||||||||rs138889546||-1||HGNC|HGNC:17186||1||||0.0042|0|0|0.0209|0|0||||||||||||||||||5.444|0…	N	N	5.444	0.868	N	N
X	15305076	rs115651927	T	G	T	G	0.018806	0	0	0	0.0428714	0	0	0.0273614	0.0373444	0.0290698	0.0457516	0.0185185	0	0.0121951	0.00408719	0.0021322	0.0263158	0.00379507	0.142259	0.0206897	0	CSQ=G|intron_variant|MODIFIER|ASB11|ENSG00000165192|Transcript|ENST00000344384.8|protein_coding||1/6||||||||rs115651927||-1||HGNC|HGNC:17186||5|A1|||0.0114|0.0429|0|0|0|0||||||||||||||||||4.062|0.199969|0.868|,G|intron_variant|MODIFIER|ASB11|ENSG00000165192|Transcript|ENST00000380470.7|protein_coding||1/6||||||||rs115651927||-1||HGNC|HGNC:17186||1||||0.0114|0.0429|0|0|0|0||||||||||||||||||4.062|0…	N	N	4.062	0.868	N	N
X	15305077	.	C	T	C	T	0.00024108	0.486308	N	N	N	N	N	0.0003125	0	0	0	0	0	0	0	0	0	0	0	0.00689655	0	CSQ=T|intron_variant|MODIFIER|ASB11|ENSG00000165192|Transcript|ENST00000344384.8|protein_coding||1/6||||||||||-1||HGNC|HGNC:17186||5|A1||||||||||||||||||||||||||0.260|-0.301014|0.868|,T|intron_variant|MODIFIER|ASB11|ENSG00000165192|Transcript|ENST00000380470.7|protein_coding||1/6||||||||||-1||HGNC|HGNC:17186||1|||||||||||||||||||||||||||0.260|-0.301014|0.868|,T|intron_variant|MODIFIER|ASB11|ENSG0…	N	N	0.26	0.868	N	N
X	15305084	.	C	T	C	T	0.00063107	0	0	0	0.00099701	0	0	0.00118963	0	0	0	0	0	0	0	0	0	0	0	0	0.0754717	CSQ=T|intron_variant|MODIFIER|ASB11|ENSG00000165192|Transcript|ENST00000344384.8|protein_coding||1/6||||||||rs766790004||-1||HGNC|HGNC:17186||5|A1|||0.0003|||||||||||||||||||||||0.331|-0.269314|0.868|,T|intron_variant|MODIFIER|ASB11|ENSG00000165192|Transcript|ENST00000380470.7|protein_coding||1/6||||||||rs766790004||-1||HGNC|HGNC:17186||1||||0.0003|||||||||||||||||||||||0.331|-0.269314|0.868|,T|i…	N	N	0.331	0.868	N	N
X	15305096	.	GACTA	G	G	G	0.00024108	0.486308	N	N	N	N	N	0.0003125	0	0	0	0	0	0	0.0013624	0	0	0	0	0	0	CSQ=-|intron_variant|MODIFIER|ASB11|ENSG00000165192|Transcript|ENST00000344384.8|protein_coding||1/6||||||||rs1274451784||-1||HGNC|HGNC:17186||5|A1||||||||||||||||||||||||||1.057|-0.091323|0.868|,-|intron_variant|MODIFIER|ASB11|ENSG00000165192|Transcript|ENST00000380470.7|protein_coding||1/6||||||||rs1274451784||-1||HGNC|HGNC:17186||1|||||||||||||||||||||||||||1.057|-0.091323|0.868|,-|intron_vari…	N	N	1.057	0.868	N	N
X	15305120	.	TA	T	T	T	0.0002649	0.513692	0.0013089	0	0	0	0	0	N	N	N	N	N	N	N	N	N	N	N	N	N	CSQ=-|intron_variant|MODIFIER|ASB11|ENSG00000165192|Transcript|ENST00000344384.8|protein_coding||1/6||||||||rs753967010||-1||HGNC|HGNC:17186||5|A1||||||||||||||||||||||||||0.009|-0.722415|0.868|,-|intron_variant|MODIFIER|ASB11|ENSG00000165192|Transcript|ENST00000380470.7|protein_coding||1/6||||||||rs753967010||-1||HGNC|HGNC:17186||1|||||||||||||||||||||||||||0.009|-0.722415|0.868|,-|intron_varian…	N	N	0.009	0.868	N	N
X	15305127	.	A	G	A	G	0.00048216	0.486308	N	N	N	N	N	0.000625	0	0.00581395	0	0	0	0	0	0	0	0	0	0	0	CSQ=G|intron_variant|MODIFIER|ASB11|ENSG00000165192|Transcript|ENST00000344384.8|protein_coding||1/6||||||||rs774454578||-1||HGNC|HGNC:17186||5|A1||||||||||||||||||||||||||3.545|0.160205|0.868|,G|intron_variant|MODIFIER|ASB11|ENSG00000165192|Transcript|ENST00000380470.7|protein_coding||1/6||||||||rs774454578||-1||HGNC|HGNC:17186||1|||||||||||||||||||||||||||3.545|0.160205|0.868|,G|intron_variant|…	N	N	3.545	0.868	N	N
X	15305207	rs189434081	T	C	T	C	0.0010596	0.513692	0.0052356	0	0	0	0	0	N	N	N	N	N	N	N	N	N	N	N	N	N	CSQ=C|intron_variant|MODIFIER|ASB11|ENSG00000165192|Transcript|ENST00000344384.8|protein_coding||1/6||||||||rs189434081||-1||HGNC|HGNC:17186||5|A1|||0.0011|0|0|0.0052|0|0||||||||||||||||||3.549|0.160566|0.868|,C|intron_variant|MODIFIER|ASB11|ENSG00000165192|Transcript|ENST00000380470.7|protein_coding||1/6||||||||rs189434081||-1||HGNC|HGNC:17186||1||||0.0011|0|0|0.0052|0|0||||||||||||||||||3.549|0…	N	N	3.549	0.868	N	N
X	15305280	.	G	A	G	A	0.0002649	0.513692	0	0	0	0.0019084	0	0	N	N	N	N	N	N	N	N	N	N	N	N	N	CSQ=A|intron_variant|MODIFIER|ASB11|ENSG00000165192|Transcript|ENST00000344384.8|protein_coding||1/6||||||||rs779310499&COSV60355803||-1||HGNC|HGNC:17186||5|A1|||0.0003||||||||||||||||0&1|0&1||||||0.234|-0.314828|0.868|,A|intron_variant|MODIFIER|ASB11|ENSG00000165192|Transcript|ENST00000380470.7|protein_coding||1/6||||||||rs779310499&COSV60355803||-1||HGNC|HGNC:17186||1||||0.0003||||||||||||||||0…	N	N	0.234	0.868	N	N
X	15305291	rs184383020	A	G	A	G	0.0002649	0.513692	0	0.00130548	0	0	0	0	N	N	N	N	N	N	N	N	N	N	N	N	N	CSQ=G|intron_variant|MODIFIER|ASB11|ENSG00000165192|Transcript|ENST00000344384.8|protein_coding||1/6||||||||rs184383020||-1||HGNC|HGNC:17186||5|A1|||0.0003|0|0|0|0.0013|0||||||||||||||||||0.119|-0.400694|0.868|,G|intron_variant|MODIFIER|ASB11|ENSG00000165192|Transcript|ENST00000380470.7|protein_coding||1/6||||||||rs184383020||-1||HGNC|HGNC:17186||1||||0.0003|0|0|0|0.0013|0||||||||||||||||||0.119|…	N	N	0.119	0.868	N	N
X	15305313	.	C	T	C	T	0.0002649	0.513692	0	0	0.00099701	0	0	0.00099701	N	N	N	N	N	N	N	N	N	N	N	N	N	CSQ=T|intron_variant|MODIFIER|ASB11|ENSG00000165192|Transcript|ENST00000344384.8|protein_coding||1/6||||||||rs758673792||-1||HGNC|HGNC:17186||5|A1|||0.0003|||||||||||||||||||||||2.384|0.063955|0.868|,T|intron_variant|MODIFIER|ASB11|ENSG00000165192|Transcript|ENST00000380470.7|protein_coding||1/6||||||||rs758673792||-1||HGNC|HGNC:17186||1||||0.0003|||||||||||||||||||||||2.384|0.063955|0.868|,T|int…	N	N	2.384	0.868	N	N
X	15305334	rs374545467	CTG	C	C	C	0.0231437	0.486308	N	N	N	N	N	0.03	0.00414938	0	0	0	0	0	0	0	0	0.180266	0	0	0	CSQ=-|intron_variant|MODIFIER|ASB11|ENSG00000165192|Transcript|ENST00000344384.8|protein_coding||1/6||||||||rs374545467||-1||HGNC|HGNC:17186||5|A1||||||||||||||||||||||||||||0.868|,-|intron_variant|MODIFIER|ASB11|ENSG00000165192|Transcript|ENST00000380470.7|protein_coding||1/6||||||||rs374545467||-1||HGNC|HGNC:17186||1|||||||||||||||||||||||||||||0.868|,-|intron_variant|MODIFIER|ASB11|ENSG0000016…	N	N	N	0.868	N	N
X	15305344	rs189682977	A	G	A	G	0.0010596	0.513692	0.0052356	0	0	0	0	0	N	N	N	N	N	N	N	N	N	N	N	N	N	CSQ=G|intron_variant|MODIFIER|ASB11|ENSG00000165192|Transcript|ENST00000344384.8|protein_coding||1/6||||||||rs189682977||-1||HGNC|HGNC:17186||5|A1|||0.0011|0|0|0.0052|0|0||||||||||||||||||4.035|0.197869|0.868|,G|intron_variant|MODIFIER|ASB11|ENSG00000165192|Transcript|ENST00000380470.7|protein_coding||1/6||||||||rs189682977||-1||HGNC|HGNC:17186||1||||0.0011|0|0|0.0052|0|0||||||||||||||||||4.035|0…	N	N	4.035	0.868	N	N
X	15305351	rs181281079	C	A	C	A	0.0002649	0.513692	0.0013089	0	0	0	0	0	N	N	N	N	N	N	N	N	N	N	N	N	N	CSQ=A|intron_variant|MODIFIER|ASB11|ENSG00000165192|Transcript|ENST00000344384.8|protein_coding||1/6||||||||rs181281079||-1||HGNC|HGNC:17186||5|A1|||0.0003|0|0|0.0013|0|0||||||||||||||||||0.933|-0.112461|0.868|,A|intron_variant|MODIFIER|ASB11|ENSG00000165192|Transcript|ENST00000380470.7|protein_coding||1/6||||||||rs181281079||-1||HGNC|HGNC:17186||1||||0.0003|0|0|0.0013|0|0||||||||||||||||||0.933|…	N	N	0.933	0.868	N	N
X	15305414	.	A	G	A	G	0.00024108	0.486308	N	N	N	N	N	0.0003125	0	0	0	0	0	0	0.0013624	0	0	0	0	0	0	CSQ=G|intron_variant|MODIFIER|ASB11|ENSG00000165192|Transcript|ENST00000344384.8|protein_coding||1/6||||||||||-1||HGNC|HGNC:17186||5|A1||||||||||||||||||||||||||2.865|0.106082|0.868|,G|intron_variant|MODIFIER|ASB11|ENSG00000165192|Transcript|ENST00000380470.7|protein_coding||1/6||||||||||-1||HGNC|HGNC:17186||1|||||||||||||||||||||||||||2.865|0.106082|0.868|,G|intron_variant|MODIFIER|ASB11|ENSG000…	N	N	2.865	0.868	N	N
X	15305415	.	C	T	C	T	0.00048216	0.486308	N	N	N	N	N	0.000625	0	0	0.0130719	0	0	0	0	0	0	0	0	0	0	CSQ=T|intron_variant|MODIFIER|ASB11|ENSG00000165192|Transcript|ENST00000344384.8|protein_coding||1/6||||||||rs997530636||-1||HGNC|HGNC:17186||5|A1||||||||||||||||||||||||||0.004|-0.854841|0.868|,T|intron_variant|MODIFIER|ASB11|ENSG00000165192|Transcript|ENST00000380470.7|protein_coding||1/6||||||||rs997530636||-1||HGNC|HGNC:17186||1|||||||||||||||||||||||||||0.004|-0.854841|0.868|,T|intron_varian…	N	N	0.004	0.868	N	N
X	15305422	.	C	T	C	T	0.0002649	0.513692	0	0	0.00099701	0	0	0.00099701	N	N	N	N	N	N	N	N	N	N	N	N	N	CSQ=T|intron_variant|MODIFIER|ASB11|ENSG00000165192|Transcript|ENST00000344384.8|protein_coding||1/6||||||||rs770963434||-1||HGNC|HGNC:17186||5|A1|||0.0003|||||||||||||||||||||||0.238|-0.312736|0.868|,T|intron_variant|MODIFIER|ASB11|ENSG00000165192|Transcript|ENST00000380470.7|protein_coding||1/6||||||||rs770963434||-1||HGNC|HGNC:17186||1||||0.0003|||||||||||||||||||||||0.238|-0.312736|0.868|,T|i…	N	N	0.238	0.868	N	N
X	15305456	.	T	C	T	C	0.0002649	0.513692	0	0.00130548	0	0	0	0	N	N	N	N	N	N	N	N	N	N	N	N	N	CSQ=C|intron_variant|MODIFIER|ASB11|ENSG00000165192|Transcript|ENST00000344384.8|protein_coding||1/6||||||||rs780929809||-1||HGNC|HGNC:17186||5|A1|||0.0003|||||||||||||||||||||||4.533|0.236758|0.868|,C|intron_variant|MODIFIER|ASB11|ENSG00000165192|Transcript|ENST00000380470.7|protein_coding||1/6||||||||rs780929809||-1||HGNC|HGNC:17186||1||||0.0003|||||||||||||||||||||||4.533|0.236758|0.868|,C|int…	N	N	4.533	0.868	N	N
X	15305457	.	A	G	A	G	0.00024108	0.486308	N	N	N	N	N	0	0	0	0	0	0	0	0	0	0	0	0	0	0	CSQ=G|intron_variant|MODIFIER|ASB11|ENSG00000165192|Transcript|ENST00000344384.8|protein_coding||1/6||||||||||-1||HGNC|HGNC:17186||5|A1||||||||||||||||||||||||||2.348|0.060608|0.868|,G|intron_variant|MODIFIER|ASB11|ENSG00000165192|Transcript|ENST00000380470.7|protein_coding||1/6||||||||||-1||HGNC|HGNC:17186||1|||||||||||||||||||||||||||2.348|0.060608|0.868|,G|intron_variant|MODIFIER|ASB11|ENSG000…	N	N	2.348	0.868	N	N
X	15305491	.	G	C	G	C	0.00072324	0.486308	N	N	N	N	N	0	0	0	0	0	0	0	0	0	0	0	0	0	0	CSQ=C|intron_variant|MODIFIER|ASB11|ENSG00000165192|Transcript|ENST00000344384.8|protein_coding||1/6||||||||rs1005328777||-1||HGNC|HGNC:17186||5|A1||||||||||||||||||||||||||2.900|0.109050|0.868|,C|intron_variant|MODIFIER|ASB11|ENSG00000165192|Transcript|ENST00000380470.7|protein_coding||1/6||||||||rs1005328777||-1||HGNC|HGNC:17186||1|||||||||||||||||||||||||||2.900|0.109050|0.868|,C|intron_varian…	N	N	2.9	0.868	N	N
X	15305494	.	T	C	T	C	0.0002649	0.513692	0.0013089	0	0	0	0	0	N	N	N	N	N	N	N	N	N	N	N	N	N	CSQ=C|intron_variant|MODIFIER|ASB11|ENSG00000165192|Transcript|ENST00000344384.8|protein_coding||1/6||||||||rs745384395||-1||HGNC|HGNC:17186||5|A1|||0.0003|||||||||||||||||||||||6.172|0.379733|0.868|,C|intron_variant|MODIFIER|ASB11|ENSG00000165192|Transcript|ENST00000380470.7|protein_coding||1/6||||||||rs745384395||-1||HGNC|HGNC:17186||1||||0.0003|||||||||||||||||||||||6.172|0.379733|0.868|,C|int…	N	N	6.172	0.868	N	N
X	15305498	.	G	A	G	A	0.0002649	0.513692	0	0.00130548	0	0	0	0	N	N	N	N	N	N	N	N	N	N	N	N	N	CSQ=A|intron_variant|MODIFIER|ASB11|ENSG00000165192|Transcript|ENST00000344384.8|protein_coding||1/6||||||||rs769143946||-1||HGNC|HGNC:17186||5|A1|||0.0003|||||||||||||||||||||||0.670|-0.166175|0.868|,A|intron_variant|MODIFIER|ASB11|ENSG00000165192|Transcript|ENST00000380470.7|protein_coding||1/6||||||||rs769143946||-1||HGNC|HGNC:17186||1||||0.0003|||||||||||||||||||||||0.670|-0.166175|0.868|,A|i…	N	N	0.67	0.868	N	N
X	15305506	rs147022897	G	A	G	A	0.015272	0	0	0	0.0448654	0.0019084	0	0.0195099	0.00829876	0.0261628	0.0326797	0	0.00826446	0	0.0013624	0.0277186	0	0	0.0209205	0.00689655	0	CSQ=A|intron_variant|MODIFIER|ASB11|ENSG00000165192|Transcript|ENST00000344384.8|protein_coding||1/6||||||||rs147022897||-1||HGNC|HGNC:17186||5|A1|||0.0122|0.0449|0.0019|0|0|0||||||||||||||||||1.438|-0.037147|0.868|,A|intron_variant|MODIFIER|ASB11|ENSG00000165192|Transcript|ENST00000380470.7|protein_coding||1/6||||||||rs147022897||-1||HGNC|HGNC:17186||1||||0.0122|0.0449|0.0019|0|0|0||||||||||||||…	N	N	1.438	0.868	N	N
X	15305529	rs186759995	T	G	T	G	0.0002649	0.513692	0.0013089	0	0	0	0	0	N	N	N	N	N	N	N	N	N	N	N	N	N	CSQ=G|intron_variant|MODIFIER|ASB11|ENSG00000165192|Transcript|ENST00000344384.8|protein_coding||1/6||||||||rs186759995||-1||HGNC|HGNC:17186||5|A1|||0.0003|0|0|0.0013|0|0||||||||||||||||||2.410|0.066344|0.868|,G|intron_variant|MODIFIER|ASB11|ENSG00000165192|Transcript|ENST00000380470.7|protein_coding||1/6||||||||rs186759995||-1||HGNC|HGNC:17186||1||||0.0003|0|0|0.0013|0|0||||||||||||||||||2.410|0…	N	N	2.41	0.868	N	N
X	15305556	.	G	A	G	A	0.00096432	0.486308	N	N	N	N	N	0.0003125	0	0	0	0.0185185	0	0	0	0	0	0	0	0	0	CSQ=A|intron_variant|MODIFIER|ASB11|ENSG00000165192|Transcript|ENST00000344384.8|protein_coding||1/6||||||||||-1||HGNC|HGNC:17186||5|A1||||||||||||||||||||||||||1.460|-0.034399|0.868|,A|intron_variant|MODIFIER|ASB11|ENSG00000165192|Transcript|ENST00000380470.7|protein_coding||1/6||||||||||-1||HGNC|HGNC:17186||1|||||||||||||||||||||||||||1.460|-0.034399|0.868|,A|intron_variant|MODIFIER|ASB11|ENSG0…	N	N	1.46	0.868	N	N
X	15305562	.	A	G	A	G	0.00024108	0.486308	N	N	N	N	N	0	0	0	0	0	0	0	0	0	0	0	0	0	0	CSQ=G|intron_variant|MODIFIER|ASB11|ENSG00000165192|Transcript|ENST00000344384.8|protein_coding||1/6||||||||||-1||HGNC|HGNC:17186||5|A1||||||||||||||||||||||||||2.902|0.109192|0.868|,G|intron_variant|MODIFIER|ASB11|ENSG00000165192|Transcript|ENST00000380470.7|protein_coding||1/6||||||||||-1||HGNC|HGNC:17186||1|||||||||||||||||||||||||||2.902|0.109192|0.868|,G|intron_variant|MODIFIER|ASB11|ENSG000…	N	N	2.902	0.868	N	N
X	15305585	rs199507047	G	GA	G	GA	0.0106047	0.00019421	0.0026178	0.0443864	0.00697906	0.0229008	0.0292479	0.00356888	0	0	0	0.0185185	0	0	0.00953678	0	0	0	0	0	0	CSQ=A|intron_variant|MODIFIER|ASB11|ENSG00000165192|Transcript|ENST00000344384.8|protein_coding||1/6||||||||rs199507047||-1||HGNC|HGNC:17186||5|A1||||0.007|0.0229|0.0026|0.0444|0.0292||||||||||||||||||1.176|-0.072914|0.868|,A|intron_variant|MODIFIER|ASB11|ENSG00000165192|Transcript|ENST00000380470.7|protein_coding||1/6||||||||rs199507047||-1||HGNC|HGNC:17186||1|||||0.007|0.0229|0.0026|0.0444|0.02…	N	N	1.176	0.868	N	N
X	15305590	.	A	C	A	C	0.0002412	0.486502	N	N	N	N	N	0.0003125	0	0	0	0	0	0	0.0013624	0	0	0	0	0	0	CSQ=C|intron_variant|MODIFIER|ASB11|ENSG00000165192|Transcript|ENST00000344384.8|protein_coding||1/6||||||||||-1||HGNC|HGNC:17186||5|A1||||||||||||||||||||||||||2.787|0.099528|0.868|,C|intron_variant|MODIFIER|ASB11|ENSG00000165192|Transcript|ENST00000380470.7|protein_coding||1/6||||||||||-1||HGNC|HGNC:17186||1|||||||||||||||||||||||||||2.787|0.099528|0.868|,C|intron_variant|MODIFIER|ASB11|ENSG000…	N	N	2.787	0.868	N	N
X	15305612	.	G	GATAA	G	GATAA	0.00096432	0.486308	N	N	N	N	N	0.00125	0	0	0	0	0	0	0	0	0	0	0	0	0.0754717	CSQ=ATAA|intron_variant|MODIFIER|ASB11|ENSG00000165192|Transcript|ENST00000344384.8|protein_coding||1/6||||||||||-1||HGNC|HGNC:17186||5|A1||||||||||||||||||||||||||||0.868|,ATAA|intron_variant|MODIFIER|ASB11|ENSG00000165192|Transcript|ENST00000380470.7|protein_coding||1/6||||||||||-1||HGNC|HGNC:17186||1|||||||||||||||||||||||||||||0.868|,ATAA|intron_variant|MODIFIER|ASB11|ENSG00000165192|Transcri…	N	N	N	0.868	N	N
X	15305704	.	A	G	A	G	0.00151458	0	0	0	0.00299103	0.00381679	0	0.00166548	0	0.0116279	0	0	0	0	0	0	0	0	0	0	0	CSQ=G|intron_variant|MODIFIER|ASB11|ENSG00000165192|Transcript|ENST00000344384.8|protein_coding||1/6||||||||rs773632768||-1||HGNC|HGNC:17186||5|A1|||0.0013|||||||||||||||||||||||7.552|0.525097|0.868|,G|intron_variant|MODIFIER|ASB11|ENSG00000165192|Transcript|ENST00000380470.7|protein_coding||1/6||||||||rs773632768||-1||HGNC|HGNC:17186||1||||0.0013|||||||||||||||||||||||7.552|0.525097|0.868|,G|int…	N	N	7.552	0.868	N	N
X	15305709	.	T	TA	T	TA	0.00024108	0.486308	N	N	N	N	N	0	0	0	0	0	0	0	0	0	0	0	0	0	0	CSQ=A|intron_variant|MODIFIER|ASB11|ENSG00000165192|Transcript|ENST00000344384.8|protein_coding||1/6||||||||rs1344741658||-1||HGNC|HGNC:17186||5|A1||||||||||||||||||||||||||0.396|-0.244576|0.868|,A|intron_variant|MODIFIER|ASB11|ENSG00000165192|Transcript|ENST00000380470.7|protein_coding||1/6||||||||rs1344741658||-1||HGNC|HGNC:17186||1|||||||||||||||||||||||||||0.396|-0.244576|0.868|,A|intron_vari…	N	N	0.396	0.868	N	N
X	15305773	rs199772709	TTTATC	T	T	T	0.0642433	0	0	0	0.0837487	0.00954198	0	0.100404	0.145228	0.0901163	0.150327	0.0925926	0.0661157	0.109756	0.0858311	0.0021322	0.0789474	0.191651	0.146444	0.131034	0.0943396	CSQ=-|intron_variant|MODIFIER|ASB11|ENSG00000165192|Transcript|ENST00000344384.8|protein_coding||1/6||||||||rs5901557||-1||HGNC|HGNC:17186||5|A1||||0.0837|0.0095|0|0|0||||||||||||||||||0.501|-0.210500|0.868|,-|intron_variant|MODIFIER|ASB11|ENSG00000165192|Transcript|ENST00000380470.7|protein_coding||1/6||||||||rs5901557||-1||HGNC|HGNC:17186||1|||||0.0837|0.0095|0|0|0||||||||||||||||||0.501|-0.210…	N	N	0.501	0.868	N	N
X	15305783	rs190751771	G	C	G	C	0.0002649	0.513692	0	0	0.00099701	0	0	0.00099701	N	N	N	N	N	N	N	N	N	N	N	N	N	CSQ=C|intron_variant|MODIFIER|ASB11|ENSG00000165192|Transcript|ENST00000344384.8|protein_coding||1/6||||||||rs190751771||-1||HGNC|HGNC:17186||5|A1|||0.0003|0.001|0|0|0|0||||||||||||||||||0.298|-0.283455|0.868|,C|intron_variant|MODIFIER|ASB11|ENSG00000165192|Transcript|ENST00000380470.7|protein_coding||1/6||||||||rs190751771||-1||HGNC|HGNC:17186||1||||0.0003|0.001|0|0|0|0||||||||||||||||||0.298|-0…	N	N	0.298	0.868	N	N
X	15305852	rs139015955	T	C	T	C	0.0198157	0	0	0	0.0518445	0.00381679	0	0.0256959	0.0373444	0.0377907	0.0326797	0	0.00826446	0.0243902	0.00681199	0.0277186	0	0.00189753	0.0209205	0.00689655	0.0188679	CSQ=C|intron_variant|MODIFIER|ASB11|ENSG00000165192|Transcript|ENST00000344384.8|protein_coding||1/6||||||||rs139015955||-1||HGNC|HGNC:17186||5|A1|||0.0143|0.0518|0.0038|0|0|0||||||||||||||||||11.76|0.969167|0.868|,C|intron_variant|MODIFIER|ASB11|ENSG00000165192|Transcript|ENST00000380470.7|protein_coding||1/6||||||||rs139015955||-1||HGNC|HGNC:17186||1||||0.0143|0.0518|0.0038|0|0|0|||||||||||||||…	N	N	11.76	0.868	N	N
X	15305912	rs181003338	G	C	G	C	0.0002649	0.513692	0	0	0.00099701	0	0	0.00099701	N	N	N	N	N	N	N	N	N	N	N	N	N	CSQ=C|intron_variant|MODIFIER|ASB11|ENSG00000165192|Transcript|ENST00000344384.8|protein_coding||1/6||||||||rs181003338||-1||HGNC|HGNC:17186||5|A1|||0.0003|0.001|0|0|0|0||||||||||||||||||0.198|-0.336532|0.868|,C|intron_variant|MODIFIER|ASB11|ENSG00000165192|Transcript|ENST00000380470.7|protein_coding||1/6||||||||rs181003338||-1||HGNC|HGNC:17186||1||||0.0003|0.001|0|0|0|0||||||||||||||||||0.198|-0…	N	N	0.198	0.868	N	N
X	15305917	.	A	C	C	C	0.0002649	0.513692	0	0	0.00099701	0	0	0.00099701	N	N	N	N	N	N	N	N	N	N	N	N	N	CSQ=C|intron_variant|MODIFIER|ASB11|ENSG00000165192|Transcript|ENST00000344384.8|protein_coding||1/6||||||||rs765459429||-1||HGNC|HGNC:17186||5|A1|||0.0003|||||||||||||||||||||||2.647|0.087586|0.868|,C|intron_variant|MODIFIER|ASB11|ENSG00000165192|Transcript|ENST00000380470.7|protein_coding||1/6||||||||rs765459429||-1||HGNC|HGNC:17186||1||||0.0003|||||||||||||||||||||||2.647|0.087586|0.868|,C|int…	N	N	2.647	0.868	N	N
X	15305923	.	C	T	C	T	0.00265188	0.486308	N	N	N	N	N	0.0028125	0.00414938	0.00581395	0.0130719	0.0185185	0.0165289	0	0.0013624	0	0	0	0	0	0	CSQ=T|intron_variant|MODIFIER|ASB11|ENSG00000165192|Transcript|ENST00000344384.8|protein_coding||1/6||||||||rs1386754714||-1||HGNC|HGNC:17186||5|A1||||||||||||||||||||||||||1.736|-0.001676|0.868|,T|intron_variant|MODIFIER|ASB11|ENSG00000165192|Transcript|ENST00000380470.7|protein_coding||1/6||||||||rs1386754714||-1||HGNC|HGNC:17186||1|||||||||||||||||||||||||||1.736|-0.001676|0.868|,T|intron_vari…	N	N	1.736	0.868	N	N
X	15305925	rs377291338	T	C	T	C	0.0106075	0.486308	N	N	N	N	N	0.013125	0.00414938	0.00581395	0.0130719	0.0185185	0.0247934	0	0.0013624	0	0	0.0607211	0	0	0	CSQ=C|intron_variant|MODIFIER|ASB11|ENSG00000165192|Transcript|ENST00000344384.8|protein_coding||1/6||||||||rs377291338||-1||HGNC|HGNC:17186||5|A1||||||||||||||||||||||||||3.236|0.136166|0.868|,C|intron_variant|MODIFIER|ASB11|ENSG00000165192|Transcript|ENST00000380470.7|protein_coding||1/6||||||||rs377291338||-1||HGNC|HGNC:17186||1|||||||||||||||||||||||||||3.236|0.136166|0.868|,C|intron_variant|…	N	N	3.236	0.868	N	N
X	15305952	.	T	C	T	C	0.0002649	0.513692	0	0	0	0.0019084	0	0	N	N	N	N	N	N	N	N	N	N	N	N	N	CSQ=C|intron_variant|MODIFIER|ASB11|ENSG00000165192|Transcript|ENST00000344384.8|protein_coding||1/6||||||||rs752795626||-1||HGNC|HGNC:17186||5|A1|||0.0003|||||||||||||||||||||||3.442|0.152284|0.868|,C|intron_variant|MODIFIER|ASB11|ENSG00000165192|Transcript|ENST00000380470.7|protein_coding||1/6||||||||rs752795626||-1||HGNC|HGNC:17186||1||||0.0003|||||||||||||||||||||||3.442|0.152284|0.868|,C|int…	N	N	3.442	0.868	N	N
X	15305955	.	A	G	A	G	0.00024108	0.486308	N	N	N	N	N	0.0003125	0	0	0	0	0.00826446	0	0	0	0	0	0	0	0	CSQ=G|intron_variant|MODIFIER|ASB11|ENSG00000165192|Transcript|ENST00000344384.8|protein_coding||1/6||||||||||-1||HGNC|HGNC:17186||5|A1||||||||||||||||||||||||||0.866|-0.124861|0.868|,G|intron_variant|MODIFIER|ASB11|ENSG00000165192|Transcript|ENST00000380470.7|protein_coding||1/6||||||||||-1||HGNC|HGNC:17186||1|||||||||||||||||||||||||||0.866|-0.124861|0.868|,G|intron_variant|MODIFIER|ASB11|ENSG0…	N	N	0.866	0.868	N	N
X	15305986	rs149359214	T	C	T	C	0.00668939	0	0	0	0.0139581	0	0	0.00832739	0.00829876	0.00872093	0	0	0	0	0	0.0255864	0	0	0.0167364	0	0	CSQ=C|intron_variant|MODIFIER|ASB11|ENSG00000165192|Transcript|ENST00000344384.8|protein_coding||1/6||||||||rs149359214||-1||HGNC|HGNC:17186||5|A1|||0.0037|0.014|0|0|0|0||||||||||||||||||5.144|0.286753|0.868|,C|intron_variant|MODIFIER|ASB11|ENSG00000165192|Transcript|ENST00000380470.7|protein_coding||1/6||||||||rs149359214||-1||HGNC|HGNC:17186||1||||0.0037|0.014|0|0|0|0||||||||||||||||||5.144|0.2…	N	N	5.144	0.868	N	N
X	15306032	rs4370686	T	C	T	T	0.368421	0	0.566754	0.52611	0.321037	0.616412	0.229805	0.307875	0.381743	0.31686	0.248366	0.444444	0.0826446	0.195122	0.455041	0.0916844	0.368421	0.341556	0.221757	0.262069	0.396226	CSQ=C|intron_variant|MODIFIER|ASB11|ENSG00000165192|Transcript|ENST00000344384.8|protein_coding||1/6||||||||rs4370686||-1||HGNC|HGNC:17186||5|A1||||0.679|0.3836|0.4332|0.4739|0.7702||||||||||||||||||3.865|0.184806|0.868|,C|intron_variant|MODIFIER|ASB11|ENSG00000165192|Transcript|ENST00000380470.7|protein_coding||1/6||||||||rs4370686||-1||HGNC|HGNC:17186||1|||||0.679|0.3836|0.4332|0.4739|0.7702|||…	N	N	3.865	0.868	N	N
X	15306037	.	T	A	T	A	0.0002649	0.513692	0.0013089	0	0	0	0	0	N	N	N	N	N	N	N	N	N	N	N	N	N	CSQ=A|intron_variant|MODIFIER|ASB11|ENSG00000165192|Transcript|ENST00000344384.8|protein_coding||1/6||||||||rs751388058||-1||HGNC|HGNC:17186||5|A1|||0.0003|||||||||||||||||||||||1.222|-0.066196|0.868|,A|intron_variant|MODIFIER|ASB11|ENSG00000165192|Transcript|ENST00000380470.7|protein_coding||1/6||||||||rs751388058||-1||HGNC|HGNC:17186||1||||0.0003|||||||||||||||||||||||1.222|-0.066196|0.868|,A|i…	N	N	1.222	0.868	N	N
X	15306078	.	C	T	C	T	0.00024108	0.486308	N	N	N	N	N	0.0003125	0	0	0	0	0.00826446	0	0	0	0	0	0	0	0	CSQ=T|intron_variant|MODIFIER|ASB11|ENSG00000165192|Transcript|ENST00000344384.8|protein_coding||1/6||||||||||-1||HGNC|HGNC:17186||5|A1||||||||||||||||||||||||||0.790|-0.139984|0.868|,T|intron_variant|MODIFIER|ASB11|ENSG00000165192|Transcript|ENST00000380470.7|protein_coding||1/6||||||||||-1||HGNC|HGNC:17186||1|||||||||||||||||||||||||||0.790|-0.139984|0.868|,T|intron_variant|MODIFIER|ASB11|ENSG0…	N	N	0.79	0.868	N	N
X	15306079	rs4366224	A	G	A	A	0.365518	0	0.557592	0.523499	0.315055	0.616412	0.22702	0.306686	0.381743	0.31686	0.248366	0.444444	0.0826446	0.195122	0.455041	0.0916844	0.368421	0.341556	0.225941	0.262069	0.396226	CSQ=G|intron_variant|MODIFIER|ASB11|ENSG00000165192|Transcript|ENST00000344384.8|protein_coding||1/6||||||||rs4366224||-1||HGNC|HGNC:17186||5|A1|||0.5685|0.6849|0.3836|0.4424|0.4765|0.773||||||||||||||||||4.464|0.231231|0.868|,G|intron_variant|MODIFIER|ASB11|ENSG00000165192|Transcript|ENST00000380470.7|protein_coding||1/6||||||||rs4366224||-1||HGNC|HGNC:17186||1||||0.5685|0.6849|0.3836|0.4424|0.4…	N	N	4.464	0.868	N	N
X	15306136	.	T	C	T	C	0.00048216	0.486308	N	N	N	N	N	0.000625	0	0	0	0	0	0	0	0	0.0526316	0	0	0	0	CSQ=C|intron_variant|MODIFIER|ASB11|ENSG00000165192|Transcript|ENST00000344384.8|protein_coding||1/6||||||||||-1||HGNC|HGNC:17186||5|A1||||||||||||||||||||||||||3.020|0.118896|0.868|,C|intron_variant|MODIFIER|ASB11|ENSG00000165192|Transcript|ENST00000380470.7|protein_coding||1/6||||||||||-1||HGNC|HGNC:17186||1|||||||||||||||||||||||||||3.020|0.118896|0.868|,C|intron_variant|MODIFIER|ASB11|ENSG000…	N	N	3.02	0.868	N	N
X	15306168	rs186377577	G	A	G	A	0.0002649	0.513692	0.0013089	0	0	0	0	0	N	N	N	N	N	N	N	N	N	N	N	N	N	CSQ=A|intron_variant|MODIFIER|ASB11|ENSG00000165192|Transcript|ENST00000344384.8|protein_coding||1/6||||||||rs186377577||-1||HGNC|HGNC:17186||5|A1|||0.0003|0|0|0.0013|0|0||||||||||||||||||1.690|-0.006832|0.868|,A|intron_variant|MODIFIER|ASB11|ENSG00000165192|Transcript|ENST00000380470.7|protein_coding||1/6||||||||rs186377577||-1||HGNC|HGNC:17186||1||||0.0003|0|0|0.0013|0|0||||||||||||||||||1.690|…	N	N	1.69	0.868	N	N
X	15306173	.	T	C	T	C	0.0002649	0.513692	0	0	0	0	0.00139276	0	N	N	N	N	N	N	N	N	N	N	N	N	N	CSQ=C|intron_variant|MODIFIER|ASB11|ENSG00000165192|Transcript|ENST00000344384.8|protein_coding||1/6||||||||rs745741334||-1||HGNC|HGNC:17186||5|A1|||0.0003|||||||||||||||||||||||3.108|0.125927|0.868|,C|intron_variant|MODIFIER|ASB11|ENSG00000165192|Transcript|ENST00000380470.7|protein_coding||1/6||||||||rs745741334||-1||HGNC|HGNC:17186||1||||0.0003|||||||||||||||||||||||3.108|0.125927|0.868|,C|int…	N	N	3.108	0.868	N	N
X	15306208	.	T	C	T	C	0.00024108	0.486308	N	N	N	N	N	0	0	0	0	0	0	0	0	0	0	0	0	0	0	CSQ=C|intron_variant|MODIFIER|ASB11|ENSG00000165192|Transcript|ENST00000344384.8|protein_coding||1/6||||||||||-1||HGNC|HGNC:17186||5|A1||||||||||||||||||||||||||0.893|-0.119686|0.868|,C|intron_variant|MODIFIER|ASB11|ENSG00000165192|Transcript|ENST00000380470.7|protein_coding||1/6||||||||||-1||HGNC|HGNC:17186||1|||||||||||||||||||||||||||0.893|-0.119686|0.868|,C|intron_variant|MODIFIER|ASB11|ENSG0…	N	N	0.893	0.868	N	N
X	15306214	rs191121716	T	C	T	C	0.0002649	0.513692	0.0013089	0	0	0	0	0	N	N	N	N	N	N	N	N	N	N	N	N	N	CSQ=C|intron_variant|MODIFIER|ASB11|ENSG00000165192|Transcript|ENST00000344384.8|protein_coding||1/6||||||||rs191121716||-1||HGNC|HGNC:17186||5|A1|||0.0003|0|0|0.0013|0|0||||||||||||||||||0.876|-0.122854|0.868|,C|intron_variant|MODIFIER|ASB11|ENSG00000165192|Transcript|ENST00000380470.7|protein_coding||1/6||||||||rs191121716||-1||HGNC|HGNC:17186||1||||0.0003|0|0|0.0013|0|0||||||||||||||||||0.876|…	N	N	0.876	0.868	N	N
X	15306238	rs6628967	C	T	T	C	0.365644	0	0.558901	0.52611	0.316052	0.622137	0.229805	0.305258	0.385892	0.31686	0.248366	0.444444	0.0826446	0.195122	0.455041	0.0916844	0.342105	0.341556	0.221757	0.262069	0.283019	CSQ=T|intron_variant|MODIFIER|ASB11|ENSG00000165192|Transcript|ENST00000344384.8|protein_coding||1/6||||||||rs6628967||-1||HGNC|HGNC:17186||5|A1|||0.5661|0.6839|0.3779|0.4411|0.4739|0.7702||||||||||||||||||1.483|-0.031462|0.868|,T|intron_variant|MODIFIER|ASB11|ENSG00000165192|Transcript|ENST00000380470.7|protein_coding||1/6||||||||rs6628967||-1||HGNC|HGNC:17186||1||||0.5661|0.6839|0.3779|0.4411|0…	N	N	1.483	0.868	N	N
X	15306386	.	T	C	T	C	0.0002649	0.513692	0.0013089	0	0	0	0	0	N	N	N	N	N	N	N	N	N	N	N	N	N	CSQ=C|intron_variant|MODIFIER|ASB11|ENSG00000165192|Transcript|ENST00000344384.8|protein_coding||1/6||||||||rs748791818||-1||HGNC|HGNC:17186||5|A1|||0.0003|||||||||||||||||||||||3.475|0.154847|0.868|,C|intron_variant|MODIFIER|ASB11|ENSG00000165192|Transcript|ENST00000380470.7|protein_coding||1/6||||||||rs748791818||-1||HGNC|HGNC:17186||1||||0.0003|||||||||||||||||||||||3.475|0.154847|0.868|,C|int…	N	N	3.475	0.868	N	N
X	15306401	rs150669378	T	C	T	C	0.00291391	0.513692	0	0.00522193	0	0.00954198	0.00278552	0	N	N	N	N	N	N	N	N	N	N	N	N	N	CSQ=C|intron_variant|MODIFIER|ASB11|ENSG00000165192|Transcript|ENST00000344384.8|protein_coding||1/6||||||||rs150669378||-1||HGNC|HGNC:17186||5|A1|||0.0029|0|0.0095|0|0.0052|0.0028||||||||||||||||||0.366|-0.255308|0.868|,C|intron_variant|MODIFIER|ASB11|ENSG00000165192|Transcript|ENST00000380470.7|protein_coding||1/6||||||||rs150669378||-1||HGNC|HGNC:17186||1||||0.0029|0|0.0095|0|0.0052|0.0028||||…	N	N	0.366	0.868	N	N
X	15306428	rs140149804	C	T	C	T	0.0219614	0	0	0	0.0468594	0.00954198	0	0.0299786	0.0165975	0.0552326	0.00653595	0	0.0165289	0.0365854	0.0108992	0.0191898	0.105263	0.00759013	0.0711297	0.0137931	0.113208	CSQ=T|intron_variant|MODIFIER|ASB11|ENSG00000165192|Transcript|ENST00000344384.8|protein_coding||1/6||||||||rs140149804||-1||HGNC|HGNC:17186||5|A1|||0.0138|0.0469|0.0095|0|0|0||||||||||||||||||0.288|-0.287753|0.868|,T|intron_variant|MODIFIER|ASB11|ENSG00000165192|Transcript|ENST00000380470.7|protein_coding||1/6||||||||rs140149804||-1||HGNC|HGNC:17186||1||||0.0138|0.0469|0.0095|0|0|0||||||||||||||…	N	N	0.288	0.868	N	N
X	15306444	.	C	T	C	T	0.00433944	0.486308	N	N	N	N	N	0.005625	0	0	0	0	0	0	0	0.0383795	0	0	0	0	0	CSQ=T|intron_variant|MODIFIER|ASB11|ENSG00000165192|Transcript|ENST00000344384.8|protein_coding||1/6||||||||||-1||HGNC|HGNC:17186||5|A1||||||||||||||||||||||||||0.017|-0.637411|0.868|,T|intron_variant|MODIFIER|ASB11|ENSG00000165192|Transcript|ENST00000380470.7|protein_coding||1/6||||||||||-1||HGNC|HGNC:17186||1|||||||||||||||||||||||||||0.017|-0.637411|0.868|,T|intron_variant|MODIFIER|ASB11|ENSG0…	N	N	0.017	0.868	N	N
X	15306519	.	A	G	A	G	0.0002649	0.513692	0.0013089	0	0	0	0	0	N	N	N	N	N	N	N	N	N	N	N	N	N	CSQ=G|intron_variant|MODIFIER|ASB11|ENSG00000165192|Transcript|ENST00000344384.8|protein_coding||1/6||||||||rs747432610||-1||HGNC|HGNC:17186||5|A1|||0.0003|||||||||||||||||||||||4.582|0.240590|0.868|,G|intron_variant|MODIFIER|ASB11|ENSG00000165192|Transcript|ENST00000380470.7|protein_coding||1/6||||||||rs747432610||-1||HGNC|HGNC:17186||1||||0.0003|||||||||||||||||||||||4.582|0.240590|0.868|,G|int…	N	N	4.582	0.868	N	N
X	15306548	.	T	C	T	C	0.0005298	0.513692	0	0	0.00099701	0.0019084	0	0.00099701	N	N	N	N	N	N	N	N	N	N	N	N	N	CSQ=C|intron_variant|MODIFIER|ASB11|ENSG00000165192|Transcript|ENST00000344384.8|protein_coding||1/6||||||||rs771153168||-1||HGNC|HGNC:17186||5|A1|||0.0005|||||||||||||||||||||||0.704|-0.158482|0.868|,C|intron_variant|MODIFIER|ASB11|ENSG00000165192|Transcript|ENST00000380470.7|protein_coding||1/6||||||||rs771153168||-1||HGNC|HGNC:17186||1||||0.0005|||||||||||||||||||||||0.704|-0.158482|0.868|,C|i…	N	N	0.704	0.868	N	N
X	15306566	.	G	A	G	A	0.00024108	0.486308	N	N	N	N	N	0	0	0	0	0	0	0	0	0	0	0	0	0	0	CSQ=A|intron_variant|MODIFIER|ASB11|ENSG00000165192|Transcript|ENST00000344384.8|protein_coding||1/6||||||||rs774328119||-1||HGNC|HGNC:17186||5|A1||||||||||||||||||||||||||0.350|-0.261595|0.868|,A|intron_variant|MODIFIER|ASB11|ENSG00000165192|Transcript|ENST00000380470.7|protein_coding||1/6||||||||rs774328119||-1||HGNC|HGNC:17186||1|||||||||||||||||||||||||||0.350|-0.261595|0.868|,A|intron_varian…	N	N	0.35	0.868	N	N
X	15306576	rs372905292	G	A	G	A	0.0013245	0.513692	0.0065445	0	0	0	0	0	N	N	N	N	N	N	N	N	N	N	N	N	N	CSQ=A|intron_variant|MODIFIER|ASB11|ENSG00000165192|Transcript|ENST00000344384.8|protein_coding||1/6||||||||rs372905292||-1||HGNC|HGNC:17186||5|A1|||0.0013|0|0|0.0065|0|0||||||||||||||||||1.974|0.023911|0.868|,A|intron_variant|MODIFIER|ASB11|ENSG00000165192|Transcript|ENST00000380470.7|protein_coding||1/6||||||||rs372905292||-1||HGNC|HGNC:17186||1||||0.0013|0|0|0.0065|0|0||||||||||||||||||1.974|0…	N	N	1.974	0.868	N	N
X	15306633	.	G	A	G	A	0.00265188	0.486308	N	N	N	N	N	0.0028125	0.00414938	0.00581395	0.0130719	0.0185185	0.0165289	0	0.0013624	0	0	0	0	0	0	CSQ=A|intron_variant|MODIFIER|ASB11|ENSG00000165192|Transcript|ENST00000344384.8|protein_coding||1/6||||||||rs978633997||-1||HGNC|HGNC:17186||5|A1||||||||||||||||||||||||||0.050|-0.508651|0.868|,A|intron_variant|MODIFIER|ASB11|ENSG00000165192|Transcript|ENST00000380470.7|protein_coding||1/6||||||||rs978633997||-1||HGNC|HGNC:17186||1|||||||||||||||||||||||||||0.050|-0.508651|0.868|,A|intron_varian…	N	N	0.05	0.868	N	N
X	15306649	rs143896253	G	C	G	C	0.00580588	0	0	0.035248	0.00199402	0.0229008	0.00557103	0.00071378	0	0	0	0	0	0	0.0013624	0	0	0	0	0	0	CSQ=C|intron_variant|MODIFIER|ASB11|ENSG00000165192|Transcript|ENST00000344384.8|protein_coding||1/6||||||||rs143896253||-1||HGNC|HGNC:17186||5|A1|||0.0119|0.002|0.0229|0|0.0352|0.0056||||||||||||||||||1.620|-0.014918|0.868|,C|intron_variant|MODIFIER|ASB11|ENSG00000165192|Transcript|ENST00000380470.7|protein_coding||1/6||||||||rs143896253||-1||HGNC|HGNC:17186||1||||0.0119|0.002|0.0229|0|0.0352|0.…	N	N	1.62	0.868	N	N
X	15306659	rs182913314	C	T	C	T	0.0005298	0.513692	0.0026178	0	0	0	0	0	N	N	N	N	N	N	N	N	N	N	N	N	N	CSQ=T|intron_variant|MODIFIER|ASB11|ENSG00000165192|Transcript|ENST00000344384.8|protein_coding||1/6||||||||rs182913314||-1||HGNC|HGNC:17186||5|A1|||0.0005|0|0|0.0026|0|0||||||||||||||||||1.501|-0.029223|0.868|,T|intron_variant|MODIFIER|ASB11|ENSG00000165192|Transcript|ENST00000380470.7|protein_coding||1/6||||||||rs182913314||-1||HGNC|HGNC:17186||1||||0.0005|0|0|0.0026|0|0||||||||||||||||||1.501|…	N	N	1.501	0.868	N	N
X	15306669	rs188418068	C	T	C	T	0.00238411	0.513692	0	0	0	0.0171756	0	0	N	N	N	N	N	N	N	N	N	N	N	N	N	CSQ=T|intron_variant|MODIFIER|ASB11|ENSG00000165192|Transcript|ENST00000344384.8|protein_coding||1/6||||||||rs188418068||-1||HGNC|HGNC:17186||5|A1|||0.0024|0|0.0172|0|0|0||||||||||||||||||2.193|0.045906|0.868|,T|intron_variant|MODIFIER|ASB11|ENSG00000165192|Transcript|ENST00000380470.7|protein_coding||1/6||||||||rs188418068||-1||HGNC|HGNC:17186||1||||0.0024|0|0.0172|0|0|0||||||||||||||||||2.193|0…	N	N	2.193	0.868	N	N
X	15306680	rs191242049	G	A	G	A	0.00100972	0	0	0	0.00299103	0	0	0.00166548	0	0.00290698	0	0	0	0.0121951	0	0.0021322	0	0	0	0.00689655	0	CSQ=A|intron_variant|MODIFIER|ASB11|ENSG00000165192|Transcript|ENST00000344384.8|protein_coding||1/6||||||||rs191242049||-1||HGNC|HGNC:17186||5|A1|||0.0008|0.003|0|0|0|0||||||||||||||||||1.643|-0.012326|0.868|,A|intron_variant|MODIFIER|ASB11|ENSG00000165192|Transcript|ENST00000380470.7|protein_coding||1/6||||||||rs191242049||-1||HGNC|HGNC:17186||1||||0.0008|0.003|0|0|0|0||||||||||||||||||1.643|-0…	N	N	1.643	0.868	N	N
X	15306703	.	A	AAACAACAAC	A	AAACAACAAC	0.00688742	0.513692	0	0	0.0249252	0.0019084	0	0.0249252	N	N	N	N	N	N	N	N	N	N	N	N	N	CSQ=AACAACAAC|intron_variant|MODIFIER|ASB11|ENSG00000165192|Transcript|ENST00000344384.8|protein_coding||1/6||||||||rs767262827||-1||HGNC|HGNC:17186||5|A1||||||||||||||||||||||||||0.767|-0.144671|0.868|,AACAACAAC|intron_variant|MODIFIER|ASB11|ENSG00000165192|Transcript|ENST00000380470.7|protein_coding||1/6||||||||rs767262827||-1||HGNC|HGNC:17186||1|||||||||||||||||||||||||||0.767|-0.144671|0.868|…	N	N	0.767	0.868	N	N
X	15306736	.	C	T	C	T	0.0002649	0.513692	0	0.00130548	0	0	0	0	N	N	N	N	N	N	N	N	N	N	N	N	N	CSQ=T|intron_variant|MODIFIER|ASB11|ENSG00000165192|Transcript|ENST00000344384.8|protein_coding||1/6||||||||rs750199601||-1||HGNC|HGNC:17186||5|A1|||0.0003|||||||||||||||||||||||1.716|-0.003969|0.868|,T|intron_variant|MODIFIER|ASB11|ENSG00000165192|Transcript|ENST00000380470.7|protein_coding||1/6||||||||rs750199601||-1||HGNC|HGNC:17186||1||||0.0003|||||||||||||||||||||||1.716|-0.003969|0.868|,T|i…	N	N	1.716	0.868	N	N
X	15306760	.	T	C	T	C	0.00096432	0.486308	N	N	N	N	N	0.00125	0	0	0	0	0	0	0.00544959	0	0	0	0	0	0	CSQ=C|intron_variant|MODIFIER|ASB11|ENSG00000165192|Transcript|ENST00000344384.8|protein_coding||1/6||||||||||-1||HGNC|HGNC:17186||5|A1||||||||||||||||||||||||||7.847|0.558946|0.868|,C|intron_variant|MODIFIER|ASB11|ENSG00000165192|Transcript|ENST00000380470.7|protein_coding||1/6||||||||||-1||HGNC|HGNC:17186||1|||||||||||||||||||||||||||7.847|0.558946|0.868|,C|intron_variant|MODIFIER|ASB11|ENSG000…	N	N	7.847	0.868	N	N
X	15306825	.	T	A	C	A	0.00024108	0.486308	N	N	N	N	N	0.0003125	0	0	0	0	0	0	0.0013624	0	0	0	0	0	0	CSQ=A|intron_variant|MODIFIER|ASB11|ENSG00000165192|Transcript|ENST00000344384.8|protein_coding||1/6||||||||||-1||HGNC|HGNC:17186||5|A1||||||||||||||||||||||||||3.353|0.145330|0.868|,A|intron_variant|MODIFIER|ASB11|ENSG00000165192|Transcript|ENST00000380470.7|protein_coding||1/6||||||||||-1||HGNC|HGNC:17186||1|||||||||||||||||||||||||||3.353|0.145330|0.868|,A|intron_variant|MODIFIER|ASB11|ENSG000…	N	N	3.353	0.868	N	N
X	15306826	.	G	A	A	A	0.00048216	0.486308	N	N	N	N	N	0	0	0	0	0	0	0	0	0	0	0	0	0	0	CSQ=A|intron_variant|MODIFIER|ASB11|ENSG00000165192|Transcript|ENST00000344384.8|protein_coding||1/6||||||||||-1||HGNC|HGNC:17186||5|A1||||||||||||||||||||||||||0.751|-0.148047|0.868|,A|intron_variant|MODIFIER|ASB11|ENSG00000165192|Transcript|ENST00000380470.7|protein_coding||1/6||||||||||-1||HGNC|HGNC:17186||1|||||||||||||||||||||||||||0.751|-0.148047|0.868|,A|intron_variant|MODIFIER|ASB11|ENSG0…	N	N	0.751	0.868	N	N
X	15306866	.	T	G	T	G	0.0002649	0.513692	0	0	0	0	0.00139276	0	N	N	N	N	N	N	N	N	N	N	N	N	N	CSQ=G|intron_variant|MODIFIER|ASB11|ENSG00000165192|Transcript|ENST00000344384.8|protein_coding||1/6||||||||rs756108991||-1||HGNC|HGNC:17186||5|A1|||0.0003|||||||||||||||||||||||0.725|-0.153636|0.868|,G|intron_variant|MODIFIER|ASB11|ENSG00000165192|Transcript|ENST00000380470.7|protein_coding||1/6||||||||rs756108991||-1||HGNC|HGNC:17186||1||||0.0003|||||||||||||||||||||||0.725|-0.153636|0.868|,G|i…	N	N	0.725	0.868	N	N
X	15306869	.	G	A	G	A	0.0005298	0.513692	0	0	0	0	0.00278552	0	N	N	N	N	N	N	N	N	N	N	N	N	N	CSQ=A|intron_variant|MODIFIER|ASB11|ENSG00000165192|Transcript|ENST00000344384.8|protein_coding||1/6||||||||rs779952990||-1||HGNC|HGNC:17186||5|A1|||0.0005|||||||||||||||||||||||0.511|-0.207581|0.868|,A|intron_variant|MODIFIER|ASB11|ENSG00000165192|Transcript|ENST00000380470.7|protein_coding||1/6||||||||rs779952990||-1||HGNC|HGNC:17186||1||||0.0005|||||||||||||||||||||||0.511|-0.207581|0.868|,A|i…	N	N	0.511	0.868	N	N
X	15306918	rs182952806	G	A	G	A	0.0005298	0.513692	0	0	0.00199402	0	0	0.00199402	N	N	N	N	N	N	N	N	N	N	N	N	N	CSQ=A|intron_variant|MODIFIER|ASB11|ENSG00000165192|Transcript|ENST00000344384.8|protein_coding||1/6||||||||rs182952806||-1||HGNC|HGNC:17186||5|A1|||0.0005|0.002|0|0|0|0||||||||||||||||||2.364|0.062091|0.868|,A|intron_variant|MODIFIER|ASB11|ENSG00000165192|Transcript|ENST00000380470.7|protein_coding||1/6||||||||rs182952806||-1||HGNC|HGNC:17186||1||||0.0005|0.002|0|0|0|0||||||||||||||||||2.364|0.0…	N	N	2.364	0.868	N	N
X	15306947	rs188394690	G	A	G	A	0.0002649	0.513692	0	0	0.00099701	0	0	0.00099701	N	N	N	N	N	N	N	N	N	N	N	N	N	CSQ=A|intron_variant|MODIFIER|ASB11|ENSG00000165192|Transcript|ENST00000344384.8|protein_coding||1/6||||||||rs188394690||-1||HGNC|HGNC:17186||5|A1|||0.0003|0.001|0|0|0|0||||||||||||||||||0.088|-0.437993|0.868|,A|intron_variant|MODIFIER|ASB11|ENSG00000165192|Transcript|ENST00000380470.7|protein_coding||1/6||||||||rs188394690||-1||HGNC|HGNC:17186||1||||0.0003|0.001|0|0|0|0||||||||||||||||||0.088|-0…	N	N	0.088	0.868	N	N
X	15306961	.	T	C	T	C	0.00072324	0.486308	N	N	N	N	N	0.000625	0.00414938	0.00290698	0	0	0	0	0	0	0	0	0	0	0	CSQ=C|intron_variant|MODIFIER|ASB11|ENSG00000165192|Transcript|ENST00000344384.8|protein_coding||1/6||||||||rs910631955||-1||HGNC|HGNC:17186||5|A1||||||||||||||||||||||||||0.773|-0.143477|0.868|,C|intron_variant|MODIFIER|ASB11|ENSG00000165192|Transcript|ENST00000380470.7|protein_coding||1/6||||||||rs910631955||-1||HGNC|HGNC:17186||1|||||||||||||||||||||||||||0.773|-0.143477|0.868|,C|intron_varian…	N	N	0.773	0.868	N	N
X	15307048	.	G	A	G	A	0.0002649	0.513692	0	0	0	0	0.00139276	0	N	N	N	N	N	N	N	N	N	N	N	N	N	CSQ=A|intron_variant|MODIFIER|ASB11|ENSG00000165192|Transcript|ENST00000344384.8|protein_coding||1/6||||||||rs778651435||-1||HGNC|HGNC:17186||5|A1|||0.0003|||||||||||||||||||||||3.947|0.191111|0.868|,A|intron_variant|MODIFIER|ASB11|ENSG00000165192|Transcript|ENST00000380470.7|protein_coding||1/6||||||||rs778651435||-1||HGNC|HGNC:17186||1||||0.0003|||||||||||||||||||||||3.947|0.191111|0.868|,A|int…	N	N	3.947	0.868	N	N
X	15307068	rs5935941	G	A	A	G	0.431402	0	0.565445	0.528721	0.41675	0.637405	0.229805	0.399239	0.477178	0.377907	0.385621	0.518519	0.115702	0.231707	0.551771	0.208955	0.394737	0.351044	0.447699	0.434483	0.415094	CSQ=A|intron_variant|MODIFIER|ASB11|ENSG00000165192|Transcript|ENST00000344384.8|protein_coding||1/6||||||||rs5935941||-1||HGNC|HGNC:17186||5|A1|||0.5354|0.5833|0.3626|0.4346|0.4713|0.7702||||||||||||||||||4.861|0.263117|0.868|,A|intron_variant|MODIFIER|ASB11|ENSG00000165192|Transcript|ENST00000380470.7|protein_coding||1/6||||||||rs5935941||-1||HGNC|HGNC:17186||1||||0.5354|0.5833|0.3626|0.4346|0.…	N	N	4.861	0.868	N	N
X	15307087	rs191193193	C	T	C	T	0.0007947	0.513692	0	0.00130548	0.00199402	0	0	0.00199402	N	N	N	N	N	N	N	N	N	N	N	N	N	CSQ=T|intron_variant|MODIFIER|ASB11|ENSG00000165192|Transcript|ENST00000344384.8|protein_coding||1/6||||||||rs191193193||-1||HGNC|HGNC:17186||5|A1|||0.0008|0.002|0|0|0.0013|0||||||||||||||||||4.533|0.236718|0.868|,T|intron_variant|MODIFIER|ASB11|ENSG00000165192|Transcript|ENST00000380470.7|protein_coding||1/6||||||||rs191193193||-1||HGNC|HGNC:17186||1||||0.0008|0.002|0|0|0.0013|0|||||||||||||||||…	N	N	4.533	0.868	N	N
X	15307096	.	A	T	A	T	0.0002649	0.513692	0.0013089	0	0	0	0	0	N	N	N	N	N	N	N	N	N	N	N	N	N	CSQ=T|intron_variant|MODIFIER|ASB11|ENSG00000165192|Transcript|ENST00000344384.8|protein_coding||1/6||||||||rs776929594||-1||HGNC|HGNC:17186||5|A1|||0.0003|||||||||||||||||||||||4.718|0.251526|0.868|,T|intron_variant|MODIFIER|ASB11|ENSG00000165192|Transcript|ENST00000380470.7|protein_coding||1/6||||||||rs776929594||-1||HGNC|HGNC:17186||1||||0.0003|||||||||||||||||||||||4.718|0.251526|0.868|,T|int…	N	N	4.718	0.868	N	N
X	15307103	.	T	C	T	C	0.00037864	0	0	0	0.00199402	0	0	0.00047585	0	0	0	0	0	0	0	0	0	0	0	0	0	CSQ=C|intron_variant|MODIFIER|ASB11|ENSG00000165192|Transcript|ENST00000344384.8|protein_coding||1/6||||||||rs746234152||-1||HGNC|HGNC:17186||5|A1|||0.0005|||||||||||||||||||||||3.795|0.179418|0.868|,C|intron_variant|MODIFIER|ASB11|ENSG00000165192|Transcript|ENST00000380470.7|protein_coding||1/6||||||||rs746234152||-1||HGNC|HGNC:17186||1||||0.0005|||||||||||||||||||||||3.795|0.179418|0.868|,C|int…	N	N	3.795	0.868	N	N
X	15307122	.	C	T	C	T	0.00024108	0.486308	N	N	N	N	N	0.0003125	0	0	0	0	0	0	0.0013624	0	0	0	0	0	0	CSQ=T|intron_variant|MODIFIER|ASB11|ENSG00000165192|Transcript|ENST00000344384.8|protein_coding||1/6||||||||||-1||HGNC|HGNC:17186||5|A1||||||||||||||||||||||||||0.550|-0.196797|0.868|,T|intron_variant|MODIFIER|ASB11|ENSG00000165192|Transcript|ENST00000380470.7|protein_coding||1/6||||||||||-1||HGNC|HGNC:17186||1|||||||||||||||||||||||||||0.550|-0.196797|0.868|,T|intron_variant|MODIFIER|ASB11|ENSG0…	N	N	0.55	0.868	N	N
X	15307183	.	A	G	A	G	0.00433944	0.486308	N	N	N	N	N	0.005625	0	0	0	0	0	0	0	0.0383795	0	0	0	0	0	CSQ=G|intron_variant|MODIFIER|ASB11|ENSG00000165192|Transcript|ENST00000344384.8|protein_coding||1/6||||||||rs1226281283||-1||HGNC|HGNC:17186||5|A1||||||||||||||||||||||||||1.991|0.025650|0.868|,G|intron_variant|MODIFIER|ASB11|ENSG00000165192|Transcript|ENST00000380470.7|protein_coding||1/6||||||||rs1226281283||-1||HGNC|HGNC:17186||1|||||||||||||||||||||||||||1.991|0.025650|0.868|,G|intron_varian…	N	N	1.991	0.868	N	N
X	15307221	rs5935942	G	C	C	G	0.368295	0	0.565445	0.52611	0.317049	0.627863	0.229805	0.308589	0.381743	0.31686	0.248366	0.444444	0.0826446	0.195122	0.455041	0.0916844	0.315789	0.341556	0.284519	0.262069	0.283019	CSQ=C|intron_variant|MODIFIER|ASB11|ENSG00000165192|Transcript|ENST00000344384.8|protein_coding||1/6||||||||rs5935942||-1||HGNC|HGNC:17186||5|A1|||0.5637|0.683|0.3721|0.4346|0.4739|0.7702||||||||||||||||||0.454|-0.225127|0.868|,C|intron_variant|MODIFIER|ASB11|ENSG00000165192|Transcript|ENST00000380470.7|protein_coding||1/6||||||||rs5935942||-1||HGNC|HGNC:17186||1||||0.5637|0.683|0.3721|0.4346|0.4…	N	N	0.454	0.868	N	N
X	15307227	.	T	C	T	C	0.0002649	0.513692	0	0	0.00099701	0	0	0.00099701	N	N	N	N	N	N	N	N	N	N	N	N	N	CSQ=C|intron_variant|MODIFIER|ASB11|ENSG00000165192|Transcript|ENST00000344384.8|protein_coding||1/6||||||||rs776078024||-1||HGNC|HGNC:17186||5|A1|||0.0003|||||||||||||||||||||||4.036|0.197925|0.868|,C|intron_variant|MODIFIER|ASB11|ENSG00000165192|Transcript|ENST00000380470.7|protein_coding||1/6||||||||rs776078024||-1||HGNC|HGNC:17186||1||||0.0003|||||||||||||||||||||||4.036|0.197925|0.868|,C|int…	N	N	4.036	0.868	N	N
X	15307227	.	T	TA	T	TA	0.00048216	0.486308	N	N	N	N	N	0.0003125	0	0	0	0	0	0	0	0	0	0	0	0.00689655	0	CSQ=A|intron_variant|MODIFIER|ASB11|ENSG00000165192|Transcript|ENST00000344384.8|protein_coding||1/6||||||||||-1||HGNC|HGNC:17186||5|A1||||||||||||||||||||||||||||0.868|,A|intron_variant|MODIFIER|ASB11|ENSG00000165192|Transcript|ENST00000380470.7|protein_coding||1/6||||||||||-1||HGNC|HGNC:17186||1|||||||||||||||||||||||||||||0.868|,A|intron_variant|MODIFIER|ASB11|ENSG00000165192|Transcript|ENST00…	N	N	N	0.868	N	N
X	15307254	.	C	G	C	G	0.00048216	0.486308	N	N	N	N	N	0.000625	0	0	0.0130719	0	0	0	0	0	0	0	0	0	0	CSQ=G|intron_variant|MODIFIER|ASB11|ENSG00000165192|Transcript|ENST00000344384.8|protein_coding||1/6||||||||||-1||HGNC|HGNC:17186||5|A1||||||||||||||||||||||||||5.287|0.298934|0.868|,G|intron_variant|MODIFIER|ASB11|ENSG00000165192|Transcript|ENST00000380470.7|protein_coding||1/6||||||||||-1||HGNC|HGNC:17186||1|||||||||||||||||||||||||||5.287|0.298934|0.868|,G|intron_variant|MODIFIER|ASB11|ENSG000…	N	N	5.287	0.868	N	N
X	15307294	rs187586083	A	G	A	G	0.00265051	0	0	0.00913838	0	0	0.00278552	0.00214133	0.00414938	0	0	0.0185185	0	0	0.00953678	0	0	0	0	0	0	CSQ=G|intron_variant|MODIFIER|ASB11|ENSG00000165192|Transcript|ENST00000344384.8|protein_coding||1/6||||||||rs187586083||-1||HGNC|HGNC:17186||5|A1|||0.0024|0|0|0|0.0091|0.0028||||||||||||||||||5.412|0.309776|0.868|,G|intron_variant|MODIFIER|ASB11|ENSG00000165192|Transcript|ENST00000380470.7|protein_coding||1/6||||||||rs187586083||-1||HGNC|HGNC:17186||1||||0.0024|0|0|0|0.0091|0.0028|||||||||||||||…	N	N	5.412	0.868	N	N
X	15307297	rs192523341	G	A	G	A	0.0002649	0.513692	0	0.00130548	0	0	0	0	N	N	N	N	N	N	N	N	N	N	N	N	N	CSQ=A|intron_variant|MODIFIER|ASB11|ENSG00000165192|Transcript|ENST00000344384.8|protein_coding||1/6||||||||rs192523341||-1||HGNC|HGNC:17186||5|A1|||0.0003|0|0|0|0.0013|0||||||||||||||||||5.141|0.286430|0.868|,A|intron_variant|MODIFIER|ASB11|ENSG00000165192|Transcript|ENST00000380470.7|protein_coding||1/6||||||||rs192523341||-1||HGNC|HGNC:17186||1||||0.0003|0|0|0|0.0013|0||||||||||||||||||5.141|0…	N	N	5.141	0.868	N	N
X	15307348	.	G	T	G	T	0.0002649	0.513692	0	0	0	0.0019084	0	0	N	N	N	N	N	N	N	N	N	N	N	N	N	CSQ=T|intron_variant|MODIFIER|ASB11|ENSG00000165192|Transcript|ENST00000344384.8|protein_coding||1/6||||||||rs774464638||-1||HGNC|HGNC:17186||5|A1|||0.0003|||||||||||||||||||||||2.060|0.032696|0.868|,T|intron_variant|MODIFIER|ASB11|ENSG00000165192|Transcript|ENST00000380470.7|protein_coding||1/6||||||||rs774464638||-1||HGNC|HGNC:17186||1||||0.0003|||||||||||||||||||||||2.060|0.032696|0.868|,T|int…	N	N	2.06	0.868	N	N
X	15307355	.	T	G	T	G	0.0002649	0.513692	0	0.00130548	0	0	0	0	N	N	N	N	N	N	N	N	N	N	N	N	N	CSQ=G|intron_variant|MODIFIER|ASB11|ENSG00000165192|Transcript|ENST00000344384.8|protein_coding||1/6||||||||rs761979340||-1||HGNC|HGNC:17186||5|A1|||0.0003|||||||||||||||||||||||1.139|-0.078461|0.868|,G|intron_variant|MODIFIER|ASB11|ENSG00000165192|Transcript|ENST00000380470.7|protein_coding||1/6||||||||rs761979340||-1||HGNC|HGNC:17186||1||||0.0003|||||||||||||||||||||||1.139|-0.078461|0.868|,G|i…	N	N	1.139	0.868	N	N
X	15307384	rs184171933	G	A	G	A	0.0042913	0	0	0.00130548	0.00299103	0	0	0.00713776	0.0124481	0	0.0130719	0.0185185	0	0	0.0163488	0	0.105263	0.00379507	0	0.0206897	0	CSQ=A|intron_variant|MODIFIER|ASB11|ENSG00000165192|Transcript|ENST00000344384.8|protein_coding||1/6||||||||rs184171933||-1||HGNC|HGNC:17186||5|A1|||0.0011|0.003|0|0|0.0013|0||||||||||||||||||1.735|-0.001813|0.868|,A|intron_variant|MODIFIER|ASB11|ENSG00000165192|Transcript|ENST00000380470.7|protein_coding||1/6||||||||rs184171933||-1||HGNC|HGNC:17186||1||||0.0011|0.003|0|0|0.0013|0||||||||||||||||…	N	N	1.735	0.868	N	N
X	15307385	.	G	A	G	A	0.0007947	0.513692	0	0	0	0	0.00417827	0	N	N	N	N	N	N	N	N	N	N	N	N	N	CSQ=A|intron_variant|MODIFIER|ASB11|ENSG00000165192|Transcript|ENST00000344384.8|protein_coding||1/6||||||||rs750242896||-1||HGNC|HGNC:17186||5|A1|||0.0008|||||||||||||||||||||||0.444|-0.228366|0.868|,A|intron_variant|MODIFIER|ASB11|ENSG00000165192|Transcript|ENST00000380470.7|protein_coding||1/6||||||||rs750242896||-1||HGNC|HGNC:17186||1||||0.0008|||||||||||||||||||||||0.444|-0.228366|0.868|,A|i…	N	N	0.444	0.868	N	N
X	15307414	rs68134042	C	T	C	T	0.277546	0	0.0104712	0.0822454	0.378863	0.0706107	0.135097	0.399952	0.278008	0.47093	0.424837	0.259259	0.561983	0.573171	0.196185	0.750533	0.342105	0.44592	0.301255	0.324138	0.283019	CSQ=T|intron_variant|MODIFIER|ASB11|ENSG00000165192|Transcript|ENST00000344384.8|protein_coding||1/6||||||||rs68134042||-1||HGNC|HGNC:17186||5|A1|||0.1550|0.3789|0.0706|0.0105|0.0822|0.1351||||||||||||||||||1.263|-0.060384|0.868|,T|intron_variant|MODIFIER|ASB11|ENSG00000165192|Transcript|ENST00000380470.7|protein_coding||1/6||||||||rs68134042||-1||HGNC|HGNC:17186||1||||0.1550|0.3789|0.0706|0.0105…	N	N	1.263	0.868	N	N
X	15307430	.	C	A	C	A	0.00048216	0.486308	N	N	N	N	N	0.0003125	0	0	0	0	0	0	0.0013624	0	0	0	0	0	0	CSQ=A|intron_variant|MODIFIER|ASB11|ENSG00000165192|Transcript|ENST00000344384.8|protein_coding||1/6||||||||||-1||HGNC|HGNC:17186||5|A1||||||||||||||||||||||||||3.418|0.150431|0.868|,A|intron_variant|MODIFIER|ASB11|ENSG00000165192|Transcript|ENST00000380470.7|protein_coding||1/6||||||||||-1||HGNC|HGNC:17186||1|||||||||||||||||||||||||||3.418|0.150431|0.868|,A|intron_variant|MODIFIER|ASB11|ENSG000…	N	N	3.418	0.868	N	N
X	15307435	.	G	T	G	T	0.00072324	0.486308	N	N	N	N	N	0.0009375	0	0	0	0	0	0	0.00408719	0	0	0	0	0	0	CSQ=T|intron_variant|MODIFIER|ASB11|ENSG00000165192|Transcript|ENST00000344384.8|protein_coding||1/6||||||||||-1||HGNC|HGNC:17186||5|A1||||||||||||||||||||||||||0.676|-0.164899|0.868|,T|intron_variant|MODIFIER|ASB11|ENSG00000165192|Transcript|ENST00000380470.7|protein_coding||1/6||||||||||-1||HGNC|HGNC:17186||1|||||||||||||||||||||||||||0.676|-0.164899|0.868|,T|intron_variant|MODIFIER|ASB11|ENSG0…	N	N	0.676	0.868	N	N
X	15307448	rs6632267	C	T	C	T	0.274012	0	0.422775	0.387728	0.140578	0.28626	0.623955	0.176778	0.232365	0.142442	0.183007	0.203704	0.31405	0.182927	0.252044	0.0383795	0.236842	0.197343	0.179916	0.248276	0.188679	CSQ=T|intron_variant|MODIFIER|ASB11|ENSG00000165192|Transcript|ENST00000344384.8|protein_coding||1/6||||||||rs6632267||-1||HGNC|HGNC:17186||5|A1|||0.3600|0.1406|0.2863|0.4228|0.3877|0.624||||||||||||||||||3.232|0.135858|0.868|,T|intron_variant|MODIFIER|ASB11|ENSG00000165192|Transcript|ENST00000380470.7|protein_coding||1/6||||||||rs6632267||-1||HGNC|HGNC:17186||1||||0.3600|0.1406|0.2863|0.4228|0.3…	N	N	3.232	0.868	N	N
X	15307456	.	G	A	G	A	0.0012054	0.486308	N	N	N	N	N	0.0009375	0.00414938	0.00290698	0	0	0	0	0	0	0.0263158	0	0	0	0	CSQ=A|intron_variant|MODIFIER|ASB11|ENSG00000165192|Transcript|ENST00000344384.8|protein_coding||1/6||||||||rs910412272||-1||HGNC|HGNC:17186||5|A1||||||||||||||||||||||||||0.263|-0.299836|0.868|,A|intron_variant|MODIFIER|ASB11|ENSG00000165192|Transcript|ENST00000380470.7|protein_coding||1/6||||||||rs910412272||-1||HGNC|HGNC:17186||1|||||||||||||||||||||||||||0.263|-0.299836|0.868|,A|intron_varian…	N	N	0.263	0.868	N	N
X	15307476	.	G	A	G	A	0.00024108	0.486308	N	N	N	N	N	0	0	0	0	0	0	0	0	0	0	0	0	0	0	CSQ=A|intron_variant|MODIFIER|ASB11|ENSG00000165192|Transcript|ENST00000344384.8|protein_coding||1/6||||||||rs964525771||-1||HGNC|HGNC:17186||5|A1||||||||||||||||||||||||||0.007|-0.757552|0.868|,A|intron_variant|MODIFIER|ASB11|ENSG00000165192|Transcript|ENST00000380470.7|protein_coding||1/6||||||||rs964525771||-1||HGNC|HGNC:17186||1|||||||||||||||||||||||||||0.007|-0.757552|0.868|,A|intron_varian…	N	N	0.007	0.868	N	N
X	15307513	.	G	C	G	C	0.00024108	0.486308	N	N	N	N	N	0.0003125	0	0	0	0	0	0	0	0	0	0.00189753	0	0	0	CSQ=C|intron_variant|MODIFIER|ASB11|ENSG00000165192|Transcript|ENST00000344384.8|protein_coding||1/6||||||||||-1||HGNC|HGNC:17186||5|A1||||||||||||||||||||||||||8.974|0.693704|0.868|,C|intron_variant|MODIFIER|ASB11|ENSG00000165192|Transcript|ENST00000380470.7|protein_coding||1/6||||||||||-1||HGNC|HGNC:17186||1|||||||||||||||||||||||||||8.974|0.693704|0.868|,C|intron_variant|MODIFIER|ASB11|ENSG000…	N	N	8.974	0.868	N	N
X	15307523	.	C	G	C	G	0.0002649	0.513692	0	0	0	0.0019084	0	0	N	N	N	N	N	N	N	N	N	N	N	N	N	CSQ=G|intron_variant|MODIFIER|ASB11|ENSG00000165192|Transcript|ENST00000344384.8|protein_coding||1/6||||||||rs753727055||-1||HGNC|HGNC:17186||5|A1|||0.0003|||||||||||||||||||||||8.245|0.605993|0.868|,G|intron_variant|MODIFIER|ASB11|ENSG00000165192|Transcript|ENST00000380470.7|protein_coding||1/6||||||||rs753727055||-1||HGNC|HGNC:17186||1||||0.0003|||||||||||||||||||||||8.245|0.605993|0.868|,G|int…	N	N	8.245	0.868	N	N
X	15307576	.	C	G	C	G	0.00048216	0.486308	N	N	N	N	N	0.000625	0	0	0	0	0	0	0.0027248	0	0	0	0	0	0	CSQ=G|intron_variant|MODIFIER|ASB11|ENSG00000165192|Transcript|ENST00000344384.8|protein_coding||1/6||||||||||-1||HGNC|HGNC:17186||5|A1||||||||||||||||||||||||||0.416|-0.237571|0.868|,G|intron_variant|MODIFIER|ASB11|ENSG00000165192|Transcript|ENST00000380470.7|protein_coding||1/6||||||||||-1||HGNC|HGNC:17186||1|||||||||||||||||||||||||||0.416|-0.237571|0.868|,G|intron_variant|MODIFIER|ASB11|ENSG0…	N	N	0.416	0.868	N	N
X	15307577	.	G	A	G	A	0.0002649	0.513692	0.0013089	0	0	0	0	0	N	N	N	N	N	N	N	N	N	N	N	N	N	CSQ=A|intron_variant|MODIFIER|ASB11|ENSG00000165192|Transcript|ENST00000344384.8|protein_coding||1/6||||||||rs754889438||-1||HGNC|HGNC:17186||5|A1|||0.0003|||||||||||||||||||||||0.655|-0.169911|0.868|,A|intron_variant|MODIFIER|ASB11|ENSG00000165192|Transcript|ENST00000380470.7|protein_coding||1/6||||||||rs754889438||-1||HGNC|HGNC:17186||1||||0.0003|||||||||||||||||||||||0.655|-0.169911|0.868|,A|i…	N	N	0.655	0.868	N	N
X	15307624	.	T	C	T	C	0.0007947	0.513692	0	0	0	0	0.00417827	0	N	N	N	N	N	N	N	N	N	N	N	N	N	CSQ=C|intron_variant|MODIFIER|ASB11|ENSG00000165192|Transcript|ENST00000344384.8|protein_coding||1/6||||||||rs778328303||-1||HGNC|HGNC:17186||5|A1|||0.0008|||||||||||||||||||||||3.371|0.146731|0.868|,C|intron_variant|MODIFIER|ASB11|ENSG00000165192|Transcript|ENST00000380470.7|protein_coding||1/6||||||||rs778328303||-1||HGNC|HGNC:17186||1||||0.0008|||||||||||||||||||||||3.371|0.146731|0.868|,C|int…	N	N	3.371	0.868	N	N
X	15307668	rs367968494	C	T	C	T	0.00024108	0.486308	N	N	N	N	N	0.0003125	0	0	0	0	0	0	0	0	0	0	0.0041841	0	0	CSQ=T|intron_variant|MODIFIER|ASB11|ENSG00000165192|Transcript|ENST00000344384.8|protein_coding||1/6||||||||rs367968494||-1||HGNC|HGNC:17186||5|A1||||||||||||||||||||||||||4.085|0.201738|0.868|,T|intron_variant|MODIFIER|ASB11|ENSG00000165192|Transcript|ENST00000380470.7|protein_coding||1/6||||||||rs367968494||-1||HGNC|HGNC:17186||1|||||||||||||||||||||||||||4.085|0.201738|0.868|,T|intron_variant|…	N	N	4.085	0.868	N	N
X	15307715	rs149062445	C	T	C	T	0.0206623	0.513692	0.0013089	0.078329	0.00099701	0.019084	0.00835655	0.00099701	N	N	N	N	N	N	N	N	N	N	N	N	N	CSQ=T|intron_variant|MODIFIER|ASB11|ENSG00000165192|Transcript|ENST00000344384.8|protein_coding||1/6||||||||rs149062445||-1||HGNC|HGNC:17186||5|A1|||0.0207|0.001|0.0191|0.0013|0.0783|0.0084||||||||||||||||||0.025|-0.590257|0.868|,T|intron_variant|MODIFIER|ASB11|ENSG00000165192|Transcript|ENST00000380470.7|protein_coding||1/6||||||||rs149062445||-1||HGNC|HGNC:17186||1||||0.0207|0.001|0.0191|0.0013…	N	N	0.025	0.868	N	N
X	15307716	rs12841882	G	A	G	A	0.27742	0	0.0104712	0.0822454	0.378863	0.0706107	0.135097	0.399952	0.282158	0.47093	0.424837	0.259259	0.561983	0.573171	0.194823	0.750533	0.342105	0.44592	0.301255	0.324138	0.283019	CSQ=A|intron_variant|MODIFIER|ASB11|ENSG00000165192|Transcript|ENST00000344384.8|protein_coding||1/6||||||||rs12841882||-1||HGNC|HGNC:17186||5|A1|||0.1550|0.3789|0.0706|0.0105|0.0822|0.1351||||||||||||||||||0.008|-0.743188|0.868|,A|intron_variant|MODIFIER|ASB11|ENSG00000165192|Transcript|ENST00000380470.7|protein_coding||1/6||||||||rs12841882||-1||HGNC|HGNC:17186||1||||0.1550|0.3789|0.0706|0.0105…	N	N	0.008	0.868	N	N
X	15307721	.	G	A	G	A	0.00096432	0.486308	N	N	N	N	N	0.0009375	0	0	0	0	0.0247934	0	0	0	0	0	0	0	0	CSQ=A|intron_variant|MODIFIER|ASB11|ENSG00000165192|Transcript|ENST00000344384.8|protein_coding||1/6||||||||||-1||HGNC|HGNC:17186||5|A1||||||||||||||||||||||||||1.267|-0.059880|0.868|,A|intron_variant|MODIFIER|ASB11|ENSG00000165192|Transcript|ENST00000380470.7|protein_coding||1/6||||||||||-1||HGNC|HGNC:17186||1|||||||||||||||||||||||||||1.267|-0.059880|0.868|,A|intron_variant|MODIFIER|ASB11|ENSG0…	N	N	1.267	0.868	N	N
X	15307789	.	G	T	G	T	0.0002649	0.513692	0.0013089	0	0	0	0	0	N	N	N	N	N	N	N	N	N	N	N	N	N	CSQ=T|intron_variant|MODIFIER|ASB11|ENSG00000165192|Transcript|ENST00000344384.8|protein_coding||1/6||||||||rs777429763||-1||HGNC|HGNC:17186||5|A1|||0.0003|||||||||||||||||||||||4.929|0.268768|0.868|,T|intron_variant|MODIFIER|ASB11|ENSG00000165192|Transcript|ENST00000380470.7|protein_coding||1/6||||||||rs777429763||-1||HGNC|HGNC:17186||1||||0.0003|||||||||||||||||||||||4.929|0.268768|0.868|,T|int…	N	N	4.929	0.868	N	N
X	15307813	.	CTT	C	C	C	0.00024108	0.486308	N	N	N	N	N	0	0	0	0	0	0	0	0	0	0	0	0	0	0	CSQ=-|intron_variant|MODIFIER|ASB11|ENSG00000165192|Transcript|ENST00000344384.8|protein_coding||1/6||||||||rs917175965||-1||HGNC|HGNC:17186||5|A1||||||||||||||||||||||||||0.520|-0.204980|0.868|,-|intron_variant|MODIFIER|ASB11|ENSG00000165192|Transcript|ENST00000380470.7|protein_coding||1/6||||||||rs917175965||-1||HGNC|HGNC:17186||1|||||||||||||||||||||||||||0.520|-0.204980|0.868|,-|intron_varian…	N	N	0.52	0.868	N	N
X	15307891	.	T	G	T	G	0.0002649	0.513692	0	0	0	0	0.00139276	0	N	N	N	N	N	N	N	N	N	N	N	N	N	CSQ=G|intron_variant|MODIFIER|ASB11|ENSG00000165192|Transcript|ENST00000344384.8|protein_coding||1/6||||||||rs746243837||-1||HGNC|HGNC:17186||5|A1|||0.0003|||||||||||||||||||||||6.301|0.392346|0.868|,G|intron_variant|MODIFIER|ASB11|ENSG00000165192|Transcript|ENST00000380470.7|protein_coding||1/6||||||||rs746243837||-1||HGNC|HGNC:17186||1||||0.0003|||||||||||||||||||||||6.301|0.392346|0.868|,G|int…	N	N	6.301	0.868	N	N
X	15307898	.	TA	T	T	T	0.0002649	0.513692	0	0	0	0	0.00139276	0	N	N	N	N	N	N	N	N	N	N	N	N	N	CSQ=-|intron_variant|MODIFIER|ASB11|ENSG00000165192|Transcript|ENST00000344384.8|protein_coding||1/6||||||||rs770238769||-1||HGNC|HGNC:17186||5|A1||||||||||||||||||||||||||||0.868|,-|intron_variant|MODIFIER|ASB11|ENSG00000165192|Transcript|ENST00000380470.7|protein_coding||1/6||||||||rs770238769||-1||HGNC|HGNC:17186||1|||||||||||||||||||||||||||||0.868|,-|intron_variant|MODIFIER|ASB11|ENSG0000016…	N	N	N	0.868	N	N
X	15307953	rs147823772	G	A	G	A	0.0497286	0	0	0.00261097	0.0608175	0.00763359	0	0.073281	0.0829875	0.0348837	0.137255	0.0555556	0.0330578	0.0365854	0.0817439	0.110874	0.0526316	0.00948767	0.158996	0.144828	0.113208	CSQ=A|intron_variant|MODIFIER|ASB11|ENSG00000165192|Transcript|ENST00000344384.8|protein_coding||1/6||||||||rs147823772||-1||HGNC|HGNC:17186||5|A1|||0.0178|0.0608|0.0076|0|0.0026|0||||||||||||||||||1.040|-0.094208|0.868|,A|intron_variant|MODIFIER|ASB11|ENSG00000165192|Transcript|ENST00000380470.7|protein_coding||1/6||||||||rs147823772||-1||HGNC|HGNC:17186||1||||0.0178|0.0608|0.0076|0|0.0026|0||||…	N	N	1.04	0.868	N	N
X	15307967	.	C	G	C	G	0.00113593	0	0	0	0.00099701	0	0	0.00071378	0	0	0	0	0	0.0121951	0	0	0	0	0	0.00689655	0	CSQ=G|intron_variant|MODIFIER|ASB11|ENSG00000165192|Transcript|ENST00000344384.8|protein_coding||1/6||||||||rs749856483||-1||HGNC|HGNC:17186||5|A1|||0.0003|||||||||||||||||||||||1.402|-0.041744|0.868|,G|intron_variant|MODIFIER|ASB11|ENSG00000165192|Transcript|ENST00000380470.7|protein_coding||1/6||||||||rs749856483||-1||HGNC|HGNC:17186||1||||0.0003|||||||||||||||||||||||1.402|-0.041744|0.868|,G|i…	N	N	1.402	0.868	N	N
X	15307971	.	G	A	G	A	0.00024108	0.486308	N	N	N	N	N	0.0003125	0	0	0	0	0	0	0.0013624	0	0	0	0	0	0	CSQ=A|intron_variant|MODIFIER|ASB11|ENSG00000165192|Transcript|ENST00000344384.8|protein_coding||1/6||||||||||-1||HGNC|HGNC:17186||5|A1||||||||||||||||||||||||||1.966|0.023111|0.868|,A|intron_variant|MODIFIER|ASB11|ENSG00000165192|Transcript|ENST00000380470.7|protein_coding||1/6||||||||||-1||HGNC|HGNC:17186||1|||||||||||||||||||||||||||1.966|0.023111|0.868|,A|intron_variant|MODIFIER|ASB11|ENSG000…	N	N	1.966	0.868	N	N
X	15307974	.	C	T	C	T	0.00072324	0.486308	N	N	N	N	N	0.0009375	0	0	0	0	0	0	0.00408719	0	0	0	0	0	0	CSQ=T|intron_variant|MODIFIER|ASB11|ENSG00000165192|Transcript|ENST00000344384.8|protein_coding||1/6||||||||||-1||HGNC|HGNC:17186||5|A1||||||||||||||||||||||||||1.049|-0.092718|0.868|,T|intron_variant|MODIFIER|ASB11|ENSG00000165192|Transcript|ENST00000380470.7|protein_coding||1/6||||||||||-1||HGNC|HGNC:17186||1|||||||||||||||||||||||||||1.049|-0.092718|0.868|,T|intron_variant|MODIFIER|ASB11|ENSG0…	N	N	1.049	0.868	N	N
X	15307984	.	C	G	C	G	0.0002649	0.513692	0.0013089	0	0	0	0	0	N	N	N	N	N	N	N	N	N	N	N	N	N	CSQ=G|intron_variant|MODIFIER|ASB11|ENSG00000165192|Transcript|ENST00000344384.8|protein_coding||1/6||||||||rs769173856||-1||HGNC|HGNC:17186||5|A1|||0.0003|||||||||||||||||||||||1.508|-0.028336|0.868|,G|intron_variant|MODIFIER|ASB11|ENSG00000165192|Transcript|ENST00000380470.7|protein_coding||1/6||||||||rs769173856||-1||HGNC|HGNC:17186||1||||0.0003|||||||||||||||||||||||1.508|-0.028336|0.868|,G|i…	N	N	1.508	0.868	N	N
X	15307999	rs189966120	C	T	C	T	0.0002649	0.513692	0.0013089	0	0	0	0	0	N	N	N	N	N	N	N	N	N	N	N	N	N	CSQ=T|intron_variant|MODIFIER|ASB11|ENSG00000165192|Transcript|ENST00000344384.8|protein_coding||1/6||||||||rs189966120||-1||HGNC|HGNC:17186||5|A1|||0.0003|0|0|0.0013|0|0||||||||||||||||||0.093|-0.431811|0.868|,T|intron_variant|MODIFIER|ASB11|ENSG00000165192|Transcript|ENST00000380470.7|protein_coding||1/6||||||||rs189966120||-1||HGNC|HGNC:17186||1||||0.0003|0|0|0.0013|0|0||||||||||||||||||0.093|…	N	N	0.093	0.868	N	N
X	15308088	.	G	A	G	A	0.00385728	0.486308	N	N	N	N	N	0.0040625	0.00414938	0	0	0.0185185	0	0	0.013624	0	0	0	0	0	0.0188679	CSQ=A|intron_variant|MODIFIER|ASB11|ENSG00000165192|Transcript|ENST00000344384.8|protein_coding||1/6||||||||rs761297306||-1||HGNC|HGNC:17186||5|A1||||||||||||||||||||||||||3.041|0.120536|0.868|,A|intron_variant|MODIFIER|ASB11|ENSG00000165192|Transcript|ENST00000380470.7|protein_coding||1/6||||||||rs761297306||-1||HGNC|HGNC:17186||1|||||||||||||||||||||||||||3.041|0.120536|0.868|,A|intron_variant|…	N	N	3.041	0.868	N	N
X	15308190	.	G	A	G	A	0.0002649	0.513692	0	0	0	0	0.00139276	0	N	N	N	N	N	N	N	N	N	N	N	N	N	CSQ=A|intron_variant|MODIFIER|ASB11|ENSG00000165192|Transcript|ENST00000344384.8|protein_coding||1/6||||||||rs761937987||-1||HGNC|HGNC:17186||5|A1|||0.0003|||||||||||||||||||||||3.334|0.143822|0.868|,A|intron_variant|MODIFIER|ASB11|ENSG00000165192|Transcript|ENST00000380470.7|protein_coding||1/6||||||||rs761937987||-1||HGNC|HGNC:17186||1||||0.0003|||||||||||||||||||||||3.334|0.143822|0.868|,A|int…	N	N	3.334	0.868	N	N
X	15308245	.	T	A	T	A	0.00048216	0.486308	N	N	N	N	N	0.000625	0	0	0	0	0	0	0.0027248	0	0	0	0	0	0	CSQ=A|intron_variant|MODIFIER|ASB11|ENSG00000165192|Transcript|ENST00000344384.8|protein_coding||1/6||||||||||-1||HGNC|HGNC:17186||5|A1||||||||||||||||||||||||||7.861|0.560654|0.868|,A|intron_variant|MODIFIER|ASB11|ENSG00000165192|Transcript|ENST00000380470.7|protein_coding||1/6||||||||||-1||HGNC|HGNC:17186||1|||||||||||||||||||||||||||7.861|0.560654|0.868|,A|intron_variant|MODIFIER|ASB11|ENSG000…	N	N	7.861	0.868	N	N
X	15308245	.	T	C	T	C	0.0005298	0.513692	0	0	0	0	0.00278552	0	N	N	N	N	N	N	N	N	N	N	N	N	N	CSQ=C|intron_variant|MODIFIER|ASB11|ENSG00000165192|Transcript|ENST00000344384.8|protein_coding||1/6||||||||rs772195892||-1||HGNC|HGNC:17186||5|A1|||0.0005|||||||||||||||||||||||8.240|0.605401|0.868|,C|intron_variant|MODIFIER|ASB11|ENSG00000165192|Transcript|ENST00000380470.7|protein_coding||1/6||||||||rs772195892||-1||HGNC|HGNC:17186||1||||0.0005|||||||||||||||||||||||8.240|0.605401|0.868|,C|int…	N	N	8.24	0.868	N	N
X	15308260	.	C	T	C	T	0.0002649	0.513692	0	0.00130548	0	0	0	0	N	N	N	N	N	N	N	N	N	N	N	N	N	CSQ=T|intron_variant|MODIFIER|ASB11|ENSG00000165192|Transcript|ENST00000344384.8|protein_coding||1/6||||||||rs773417355||-1||HGNC|HGNC:17186||5|A1|||0.0003|||||||||||||||||||||||8.256|0.607276|0.868|,T|intron_variant|MODIFIER|ASB11|ENSG00000165192|Transcript|ENST00000380470.7|protein_coding||1/6||||||||rs773417355||-1||HGNC|HGNC:17186||1||||0.0003|||||||||||||||||||||||8.256|0.607276|0.868|,T|int…	N	N	8.256	0.868	N	N
X	15308295	.	G	T	G	T	0.0007947	0.513692	0.0039267	0	0	0	0	0	N	N	N	N	N	N	N	N	N	N	N	N	N	CSQ=T|intron_variant|MODIFIER|ASB11|ENSG00000165192|Transcript|ENST00000344384.8|protein_coding||1/6||||||||rs760486028||-1||HGNC|HGNC:17186||5|A1|||0.0008|||||||||||||||||||||||3.094|0.124802|0.868|,T|intron_variant|MODIFIER|ASB11|ENSG00000165192|Transcript|ENST00000380470.7|protein_coding||1/6||||||||rs760486028||-1||HGNC|HGNC:17186||1||||0.0008|||||||||||||||||||||||3.094|0.124802|0.868|,T|int…	N	N	3.094	0.868	N	N
X	15308315	rs182163237	T	A	T	A	0.0018543	0.513692	0	0.00913838	0	0	0	0	N	N	N	N	N	N	N	N	N	N	N	N	N	CSQ=A|intron_variant|MODIFIER|ASB11|ENSG00000165192|Transcript|ENST00000344384.8|protein_coding||1/6||||||||rs182163237||-1||HGNC|HGNC:17186||5|A1|||0.0019|0|0|0|0.0091|0||||||||||||||||||1.801|0.005473|0.868|,A|intron_variant|MODIFIER|ASB11|ENSG00000165192|Transcript|ENST00000380470.7|protein_coding||1/6||||||||rs182163237||-1||HGNC|HGNC:17186||1||||0.0019|0|0|0|0.0091|0||||||||||||||||||1.801|0…	N	N	1.801	0.868	N	N
X	15308338	.	C	A	C	A	0.00072324	0.486308	N	N	N	N	N	0.0009375	0.00829876	0	0	0.0185185	0	0	0	0	0	0	0	0	0	CSQ=A|intron_variant|MODIFIER|ASB11|ENSG00000165192|Transcript|ENST00000344384.8|protein_coding||1/6||||||||||-1||HGNC|HGNC:17186||5|A1||||||||||||||||||||||||||0.700|-0.159342|0.868|,A|intron_variant|MODIFIER|ASB11|ENSG00000165192|Transcript|ENST00000380470.7|protein_coding||1/6||||||||||-1||HGNC|HGNC:17186||1|||||||||||||||||||||||||||0.700|-0.159342|0.868|,A|intron_variant|MODIFIER|ASB11|ENSG0…	N	N	0.7	0.868	N	N
X	15308358	rs141364379	T	G	T	G	0.00744667	0	0	0	0.0229312	0	0	0.00999286	0	0.00872093	0.0261438	0	0	0	0	0	0	0.00379507	0.041841	0	0	CSQ=G|intron_variant|MODIFIER|ASB11|ENSG00000165192|Transcript|ENST00000344384.8|protein_coding||1/6||||||||rs141364379||-1||HGNC|HGNC:17186||5|A1|||0.0061|0.0229|0|0|0|0||||||||||||||||||3.801|0.179915|0.868|,G|intron_variant|MODIFIER|ASB11|ENSG00000165192|Transcript|ENST00000380470.7|protein_coding||1/6||||||||rs141364379||-1||HGNC|HGNC:17186||1||||0.0061|0.0229|0|0|0|0||||||||||||||||||3.801|0…	N	N	3.801	0.868	N	N
X	15308363	.	C	T	C	T	0.0005298	0.513692	0	0	0.00199402	0	0	0.00199402	N	N	N	N	N	N	N	N	N	N	N	N	N	CSQ=T|intron_variant|MODIFIER|ASB11|ENSG00000165192|Transcript|ENST00000344384.8|protein_coding||1/6||||||||rs759537917&COSV60356843||-1||HGNC|HGNC:17186||5|A1|||0.0005||||||||||||||||0&1|0&1||||||7.826|0.556571|0.868|,T|intron_variant|MODIFIER|ASB11|ENSG00000165192|Transcript|ENST00000380470.7|protein_coding||1/6||||||||rs759537917&COSV60356843||-1||HGNC|HGNC:17186||1||||0.0005||||||||||||||||0&…	N	N	7.826	0.868	N	N
X	15308365	.	A	G	A	G	0.0108486	0.486308	N	N	N	N	N	0.01375	0	0	0	0	0	0	0.00544959	0	0	0.0531309	0	0.0827586	0	CSQ=G|intron_variant|MODIFIER|ASB11|ENSG00000165192|Transcript|ENST00000344384.8|protein_coding||1/6||||||||||-1||HGNC|HGNC:17186||5|A1||||||||||||||||||||||||||7.966|0.572889|0.868|,G|intron_variant|MODIFIER|ASB11|ENSG00000165192|Transcript|ENST00000380470.7|protein_coding||1/6||||||||||-1||HGNC|HGNC:17186||1|||||||||||||||||||||||||||7.966|0.572889|0.868|,G|intron_variant|MODIFIER|ASB11|ENSG000…	N	N	7.966	0.868	N	N
X	15308372	.	AAG	A	A	A	0.0012054	0.486308	N	N	N	N	N	0.0015625	0.00829876	0	0	0	0	0	0	0	0	0.0056926	0	0	0	CSQ=-|intron_variant|MODIFIER|ASB11|ENSG00000165192|Transcript|ENST00000344384.8|protein_coding||1/6||||||||||-1||HGNC|HGNC:17186||5|A1||||||||||||||||||||||||||||0.868|,-|intron_variant|MODIFIER|ASB11|ENSG00000165192|Transcript|ENST00000380470.7|protein_coding||1/6||||||||||-1||HGNC|HGNC:17186||1|||||||||||||||||||||||||||||0.868|,-|intron_variant|MODIFIER|ASB11|ENSG00000165192|Transcript|ENST00…	N	N	N	0.868	N	N
X	15308416	rs147005387	C	T	C	T	0.00211921	0.513692	0.0104712	0	0	0	0	0	N	N	N	N	N	N	N	N	N	N	N	N	N	CSQ=T|intron_variant|MODIFIER|ASB11|ENSG00000165192|Transcript|ENST00000344384.8|protein_coding||1/6||||||||rs147005387||-1||HGNC|HGNC:17186||5|A1|||0.0021|0|0|0.0105|0|0||||||||||||||||||1.650|-0.011472|0.868|,T|intron_variant|MODIFIER|ASB11|ENSG00000165192|Transcript|ENST00000380470.7|protein_coding||1/6||||||||rs147005387||-1||HGNC|HGNC:17186||1||||0.0021|0|0|0.0105|0|0||||||||||||||||||1.650|…	N	N	1.65	0.868	N	N
X	15308454	.	G	C	G	C	0.00096432	0.486308	N	N	N	N	N	0.00125	0	0	0	0	0	0	0	0.00852878	0	0	0	0	0	CSQ=C|intron_variant|MODIFIER|ASB11|ENSG00000165192|Transcript|ENST00000344384.8|protein_coding||1/6||||||||rs986142001||-1||HGNC|HGNC:17186||5|A1||||||||||||||||||||||||||2.330|0.058933|0.868|,C|intron_variant|MODIFIER|ASB11|ENSG00000165192|Transcript|ENST00000380470.7|protein_coding||1/6||||||||rs986142001||-1||HGNC|HGNC:17186||1|||||||||||||||||||||||||||2.330|0.058933|0.868|,C|intron_variant|…	N	N	2.33	0.868	N	N
X	15308468	.	T	G	T	G	0.00024108	0.486308	N	N	N	N	N	0	0	0	0	0	0	0	0	0	0	0	0	0	0	CSQ=G|intron_variant|MODIFIER|ASB11|ENSG00000165192|Transcript|ENST00000344384.8|protein_coding||1/6||||||||||-1||HGNC|HGNC:17186||5|A1||||||||||||||||||||||||||1.376|-0.045168|0.868|,G|intron_variant|MODIFIER|ASB11|ENSG00000165192|Transcript|ENST00000380470.7|protein_coding||1/6||||||||||-1||HGNC|HGNC:17186||1|||||||||||||||||||||||||||1.376|-0.045168|0.868|,G|intron_variant|MODIFIER|ASB11|ENSG0…	N	N	1.376	0.868	N	N
X	15308474	rs138213704	C	G	C	G	0.0002649	0.513692	0.0013089	0	0	0	0	0	N	N	N	N	N	N	N	N	N	N	N	N	N	CSQ=G|intron_variant|MODIFIER|ASB11|ENSG00000165192|Transcript|ENST00000344384.8|protein_coding||1/6||||||||rs138213704||-1||HGNC|HGNC:17186||5|A1|||0.0003|0|0|0.0013|0|0||||||||||||||||||0.608|-0.181310|0.868|,G|intron_variant|MODIFIER|ASB11|ENSG00000165192|Transcript|ENST00000380470.7|protein_coding||1/6||||||||rs138213704||-1||HGNC|HGNC:17186||1||||0.0003|0|0|0.0013|0|0||||||||||||||||||0.608|…	N	N	0.608	0.868	N	N
X	15308479	.	AG	A	A	A	0.00168756	0.486308	N	N	N	N	N	0.0021875	0.00414938	0.00290698	0.0261438	0	0	0	0.0013624	0	0	0	0	0	0	CSQ=-|intron_variant|MODIFIER|ASB11|ENSG00000165192|Transcript|ENST00000344384.8|protein_coding||1/6||||||||rs1309592104||-1||HGNC|HGNC:17186||5|A1||||||||||||||||||||||||||1.194|-0.070254|0.868|,-|intron_variant|MODIFIER|ASB11|ENSG00000165192|Transcript|ENST00000380470.7|protein_coding||1/6||||||||rs1309592104||-1||HGNC|HGNC:17186||1|||||||||||||||||||||||||||1.194|-0.070254|0.868|,-|intron_vari…	N	N	1.194	0.868	N	N
X	15308481	.	C	CTTG	C	CTTG	0.00168756	0.486308	N	N	N	N	N	0.0021875	0.00414938	0.00290698	0.0261438	0	0	0	0.0013624	0	0	0	0	0	0	CSQ=TTG|intron_variant|MODIFIER|ASB11|ENSG00000165192|Transcript|ENST00000344384.8|protein_coding||1/6||||||||rs1370975691||-1||HGNC|HGNC:17186||5|A1||||||||||||||||||||||||||1.223|-0.066098|0.868|,TTG|intron_variant|MODIFIER|ASB11|ENSG00000165192|Transcript|ENST00000380470.7|protein_coding||1/6||||||||rs1370975691||-1||HGNC|HGNC:17186||1|||||||||||||||||||||||||||1.223|-0.066098|0.868|,TTG|intro…	N	N	1.223	0.868	N	N
X	15308484	.	A	AG	A	AG	0.00168756	0.486308	N	N	N	N	N	0.0021875	0.00414938	0.00290698	0.0261438	0	0	0	0.0013624	0	0	0	0	0	0	CSQ=G|intron_variant|MODIFIER|ASB11|ENSG00000165192|Transcript|ENST00000344384.8|protein_coding||1/6||||||||rs1390993769||-1||HGNC|HGNC:17186||5|A1||||||||||||||||||||||||||2.542|0.078295|0.868|,G|intron_variant|MODIFIER|ASB11|ENSG00000165192|Transcript|ENST00000380470.7|protein_coding||1/6||||||||rs1390993769||-1||HGNC|HGNC:17186||1|||||||||||||||||||||||||||2.542|0.078295|0.868|,G|intron_varian…	N	N	2.542	0.868	N	N
X	15308485	.	T	TGAAA	T	TGAAA	0.00168756	0.486308	N	N	N	N	N	0.0021875	0.00414938	0.00290698	0.0261438	0	0	0	0.0013624	0	0	0	0	0	0	CSQ=GAAA|intron_variant|MODIFIER|ASB11|ENSG00000165192|Transcript|ENST00000344384.8|protein_coding||1/6||||||||rs1305147203||-1||HGNC|HGNC:17186||5|A1||||||||||||||||||||||||||4.111|0.203724|0.868|,GAAA|intron_variant|MODIFIER|ASB11|ENSG00000165192|Transcript|ENST00000380470.7|protein_coding||1/6||||||||rs1305147203||-1||HGNC|HGNC:17186||1|||||||||||||||||||||||||||4.111|0.203724|0.868|,GAAA|intr…	N	N	4.111	0.868	N	N
X	15308512	.	C	T	C	T	0.00024108	0.486308	N	N	N	N	N	0.0003125	0	0	0	0	0	0	0.0013624	0	0	0	0	0	0	CSQ=T|intron_variant|MODIFIER|ASB11|ENSG00000165192|Transcript|ENST00000344384.8|protein_coding||1/6||||||||rs1323095002||-1||HGNC|HGNC:17186||5|A1||||||||||||||||||||||||||3.201|0.133343|0.868|,T|intron_variant|MODIFIER|ASB11|ENSG00000165192|Transcript|ENST00000380470.7|protein_coding||1/6||||||||rs1323095002||-1||HGNC|HGNC:17186||1|||||||||||||||||||||||||||3.201|0.133343|0.868|,T|intron_varian…	N	N	3.201	0.868	N	N
X	15308628	.	T	C	T	C	0.00072324	0.486308	N	N	N	N	N	0.000625	0	0	0	0	0	0	0.0027248	0	0	0	0	0	0	CSQ=C|intron_variant|MODIFIER|ASB11|ENSG00000165192|Transcript|ENST00000344384.8|protein_coding||1/6||||||||||-1||HGNC|HGNC:17186||5|A1||||||||||||||||||||||||||0.360|-0.257551|0.868|,C|intron_variant|MODIFIER|ASB11|ENSG00000165192|Transcript|ENST00000380470.7|protein_coding||1/6||||||||||-1||HGNC|HGNC:17186||1|||||||||||||||||||||||||||0.360|-0.257551|0.868|,C|intron_variant|MODIFIER|ASB11|ENSG0…	N	N	0.36	0.868	N	N
X	15308650	.	A	G	A	G	0.00072324	0.486308	N	N	N	N	N	0.0009375	0.00414938	0	0	0	0	0	0.0027248	0	0	0	0	0	0	CSQ=G|intron_variant|MODIFIER|ASB11|ENSG00000165192|Transcript|ENST00000344384.8|protein_coding||1/6||||||||||-1||HGNC|HGNC:17186||5|A1||||||||||||||||||||||||||2.456|0.070587|0.868|,G|intron_variant|MODIFIER|ASB11|ENSG00000165192|Transcript|ENST00000380470.7|protein_coding||1/6||||||||||-1||HGNC|HGNC:17186||1|||||||||||||||||||||||||||2.456|0.070587|0.868|,G|intron_variant|MODIFIER|ASB11|ENSG000…	N	N	2.456	0.868	N	N
X	15308677	.	T	C	T	C	0.0005298	0.513692	0	0	0	0	0.00278552	0	N	N	N	N	N	N	N	N	N	N	N	N	N	CSQ=C|intron_variant|MODIFIER|ASB11|ENSG00000165192|Transcript|ENST00000344384.8|protein_coding||1/6||||||||rs757861713||-1||HGNC|HGNC:17186||5|A1|||0.0005|||||||||||||||||||||||2.308|0.056930|0.868|,C|intron_variant|MODIFIER|ASB11|ENSG00000165192|Transcript|ENST00000380470.7|protein_coding||1/6||||||||rs757861713||-1||HGNC|HGNC:17186||1||||0.0005|||||||||||||||||||||||2.308|0.056930|0.868|,C|int…	N	N	2.308	0.868	N	N
X	15308722	.	CCTTGTT	C	C	C	0.0002649	0.513692	0	0.00130548	0	0	0	0	N	N	N	N	N	N	N	N	N	N	N	N	N	CSQ=-|intron_variant|MODIFIER|ASB11|ENSG00000165192|Transcript|ENST00000344384.8|protein_coding||1/6||||||||rs777326093||-1||HGNC|HGNC:17186||5|A1||||||||||||||||||||||||||5.683|0.333953|0.868|,-|intron_variant|MODIFIER|ASB11|ENSG00000165192|Transcript|ENST00000380470.7|protein_coding||1/6||||||||rs777326093||-1||HGNC|HGNC:17186||1|||||||||||||||||||||||||||5.683|0.333953|0.868|,-|intron_variant|…	N	N	5.683	0.868	N	N
X	15308771	rs140429809	G	A	G	A	0.00366023	0	0	0	0.0109671	0	0	0.00499643	0.00829876	0.00872093	0	0	0	0	0	0	0.0263158	0	0	0.0275862	0	CSQ=A|intron_variant|MODIFIER|ASB11|ENSG00000165192|Transcript|ENST00000344384.8|protein_coding||1/6||||||||rs140429809||-1||HGNC|HGNC:17186||5|A1|||0.0029|0.011|0|0|0|0||||||||||||||||||0.010|-0.712649|0.868|,A|intron_variant|MODIFIER|ASB11|ENSG00000165192|Transcript|ENST00000380470.7|protein_coding||1/6||||||||rs140429809||-1||HGNC|HGNC:17186||1||||0.0029|0.011|0|0|0|0||||||||||||||||||0.010|-0…	N	N	0.01	0.868	N	N
X	15308794	rs184692352	T	A	T	A	0.011738	0	0	0	0.0229312	0.00381679	0	0.0178444	0.0124481	0.00872093	0	0.0185185	0	0.0121951	0.0013624	0.0021322	0	0	0.154812	0.0344828	0	CSQ=A|intron_variant|MODIFIER|ASB11|ENSG00000165192|Transcript|ENST00000344384.8|protein_coding||1/6||||||||rs184692352||-1||HGNC|HGNC:17186||5|A1|||0.0066|0.0229|0.0038|0|0|0||||||||||||||||||0.702|-0.158835|0.868|,A|intron_variant|MODIFIER|ASB11|ENSG00000165192|Transcript|ENST00000380470.7|protein_coding||1/6||||||||rs184692352||-1||HGNC|HGNC:17186||1||||0.0066|0.0229|0.0038|0|0|0||||||||||||||…	N	N	0.702	0.868	N	N
X	15308803	rs376869808	C	A	C	A	0.00024108	0.486308	N	N	N	N	N	0.0003125	0	0	0	0	0	0	0	0.0021322	0	0	0	0	0	CSQ=A|intron_variant|MODIFIER|ASB11|ENSG00000165192|Transcript|ENST00000344384.8|protein_coding||1/6||||||||rs376869808||-1||HGNC|HGNC:17186||5|A1||||||||||||||||||||||||||0.022|-0.609426|0.868|,A|intron_variant|MODIFIER|ASB11|ENSG00000165192|Transcript|ENST00000380470.7|protein_coding||1/6||||||||rs376869808||-1||HGNC|HGNC:17186||1|||||||||||||||||||||||||||0.022|-0.609426|0.868|,A|intron_varian…	N	N	0.022	0.868	N	N
X	15308809	.	C	T	C	T	0.00048216	0.486308	N	N	N	N	N	0.000625	0	0	0	0	0	0	0.0027248	0	0	0	0	0	0	CSQ=T|intron_variant|MODIFIER|ASB11|ENSG00000165192|Transcript|ENST00000344384.8|protein_coding||1/6||||||||||-1||HGNC|HGNC:17186||5|A1||||||||||||||||||||||||||0.260|-0.301275|0.868|,T|intron_variant|MODIFIER|ASB11|ENSG00000165192|Transcript|ENST00000380470.7|protein_coding||1/6||||||||||-1||HGNC|HGNC:17186||1|||||||||||||||||||||||||||0.260|-0.301275|0.868|,T|intron_variant|MODIFIER|ASB11|ENSG0…	N	N	0.26	0.868	N	N
X	15308820	rs73635081	T	C	T	C	0.0151458	0	0	0	0.0578265	0.00572519	0.0111421	0.0226029	0.00414938	0.0116279	0.00653595	0.0185185	0.00826446	0.0121951	0	0.0021322	0.0263158	0.0056926	0.0711297	0	0.113208	CSQ=C|intron_variant|MODIFIER|ASB11|ENSG00000165192|Transcript|ENST00000344384.8|protein_coding||1/6||||||||rs73635081||-1||HGNC|HGNC:17186||5|A1|||0.0183|0.0578|0.0057|0|0|0.0111||||||||||||||||||1.982|0.024721|0.868|,C|intron_variant|MODIFIER|ASB11|ENSG00000165192|Transcript|ENST00000380470.7|protein_coding||1/6||||||||rs73635081||-1||HGNC|HGNC:17186||1||||0.0183|0.0578|0.0057|0|0|0.0111|||||||…	N	N	1.982	0.868	N	N
X	15308834	.	C	T	C	T	0.00096432	0.486308	N	N	N	N	N	0.0009375	0	0.00872093	0	0	0	0	0	0	0	0	0	0	0	CSQ=T|intron_variant|MODIFIER|ASB11|ENSG00000165192|Transcript|ENST00000344384.8|protein_coding||1/6||||||||rs1404596703||-1||HGNC|HGNC:17186||5|A1||||||||||||||||||||||||||0.439|-0.229924|0.868|,T|intron_variant|MODIFIER|ASB11|ENSG00000165192|Transcript|ENST00000380470.7|protein_coding||1/6||||||||rs1404596703||-1||HGNC|HGNC:17186||1|||||||||||||||||||||||||||0.439|-0.229924|0.868|,T|intron_vari…	N	N	0.439	0.868	N	N
X	15308855	.	G	A	G	A	0.00025243	0	0	0	0.00099701	0	0	0.00023793	0	0	0	0	0	0	0	0	0	0	0	0	0	CSQ=A|intron_variant|MODIFIER|ASB11|ENSG00000165192|Transcript|ENST00000344384.8|protein_coding||1/6||||||||rs749663689||-1||HGNC|HGNC:17186||5|A1|||0.0003|||||||||||||||||||||||0.759|-0.146279|0.868|,A|intron_variant|MODIFIER|ASB11|ENSG00000165192|Transcript|ENST00000380470.7|protein_coding||1/6||||||||rs749663689||-1||HGNC|HGNC:17186||1||||0.0003|||||||||||||||||||||||0.759|-0.146279|0.868|,A|i…	N	N	0.759	0.868	N	N
X	15308870	rs189969315	G	A	G	A	0.00075729	0	0	0	0.00099701	0	0	0.00142755	0	0	0	0	0	0	0.00681199	0	0	0	0	0	0	CSQ=A|intron_variant|MODIFIER|ASB11|ENSG00000165192|Transcript|ENST00000344384.8|protein_coding||1/6||||||||rs189969315||-1||HGNC|HGNC:17186||5|A1|||0.0003|0.001|0|0|0|0||||||||||||||||||0.154|-0.367866|0.868|,A|intron_variant|MODIFIER|ASB11|ENSG00000165192|Transcript|ENST00000380470.7|protein_coding||1/6||||||||rs189969315||-1||HGNC|HGNC:17186||1||||0.0003|0.001|0|0|0|0||||||||||||||||||0.154|-0…	N	N	0.154	0.868	N	N
X	15308971	.	C	A	C	A	0.0002649	0.513692	0.0013089	0	0	0	0	0	N	N	N	N	N	N	N	N	N	N	N	N	N	CSQ=A|intron_variant|MODIFIER|ASB11|ENSG00000165192|Transcript|ENST00000344384.8|protein_coding||1/6||||||||rs779417872||-1||HGNC|HGNC:17186||5|A1|||0.0003|||||||||||||||||||||||1.113|-0.082473|0.868|,A|intron_variant|MODIFIER|ASB11|ENSG00000165192|Transcript|ENST00000380470.7|protein_coding||1/6||||||||rs779417872||-1||HGNC|HGNC:17186||1||||0.0003|||||||||||||||||||||||1.113|-0.082473|0.868|,A|i…	N	N	1.113	0.868	N	N
X	15308989	rs138186480	T	C	T	C	0.00732046	0	0	0	0.00997009	0	0	0.00808946	0.0124481	0.0174419	0.0130719	0.0185185	0	0	0.00953678	0.00639659	0	0	0	0	0.0377359	CSQ=C|intron_variant|MODIFIER|ASB11|ENSG00000165192|Transcript|ENST00000344384.8|protein_coding||1/6||||||||rs138186480||-1||HGNC|HGNC:17186||5|A1|||0.0026|0.01|0|0|0|0||||||||||||||||||2.602|0.083673|0.868|,C|intron_variant|MODIFIER|ASB11|ENSG00000165192|Transcript|ENST00000380470.7|protein_coding||1/6||||||||rs138186480||-1||HGNC|HGNC:17186||1||||0.0026|0.01|0|0|0|0||||||||||||||||||2.602|0.083…	N	N	2.602	0.868	N	N
X	15308992	rs180771374	C	T	C	T	0.0005298	0.513692	0.0026178	0	0	0	0	0	N	N	N	N	N	N	N	N	N	N	N	N	N	CSQ=T|intron_variant|MODIFIER|ASB11|ENSG00000165192|Transcript|ENST00000344384.8|protein_coding||1/6||||||||rs180771374||-1||HGNC|HGNC:17186||5|A1|||0.0005|0|0|0.0026|0|0||||||||||||||||||1.351|-0.048379|0.868|,T|intron_variant|MODIFIER|ASB11|ENSG00000165192|Transcript|ENST00000380470.7|protein_coding||1/6||||||||rs180771374||-1||HGNC|HGNC:17186||1||||0.0005|0|0|0.0026|0|0||||||||||||||||||1.351|…	N	N	1.351	0.868	N	N
X	15309055	.	TACAG	T	T	T	0.00238411	0.513692	0	0	0	0	0.0125348	0	N	N	N	N	N	N	N	N	N	N	N	N	N	CSQ=-|intron_variant|MODIFIER|ASB11|ENSG00000165192|Transcript|ENST00000344384.8|protein_coding||1/6||||||||rs773254084||-1||HGNC|HGNC:17186||5|A1||||||||||||||||||||||||||0.547|-0.197484|0.868|,-|intron_variant|MODIFIER|ASB11|ENSG00000165192|Transcript|ENST00000380470.7|protein_coding||1/6||||||||rs773254084||-1||HGNC|HGNC:17186||1|||||||||||||||||||||||||||0.547|-0.197484|0.868|,-|intron_varian…	N	N	0.547	0.868	N	N
X	15309074	rs12013880	T	A	T	A	0.0141361	0	0	0	0.0578265	0.00572519	0	0.0226029	0.00414938	0.0116279	0.00653595	0.0185185	0.00826446	0.0121951	0	0.0021322	0.0263158	0.0056926	0.0711297	0	0.113208	CSQ=A|intron_variant|MODIFIER|ASB11|ENSG00000165192|Transcript|ENST00000344384.8|protein_coding||1/6||||||||rs12013880||-1||HGNC|HGNC:17186||5|A1|||0.0162|0.0578|0.0057|0|0|0||||||||||||||||||4.983|0.273232|0.868|,A|intron_variant|MODIFIER|ASB11|ENSG00000165192|Transcript|ENST00000380470.7|protein_coding||1/6||||||||rs12013880||-1||HGNC|HGNC:17186||1||||0.0162|0.0578|0.0057|0|0|0|||||||||||||||||…	N	N	4.983	0.868	N	N
X	15309119	.	G	A	G	A	0.00024108	0.486308	N	N	N	N	N	0	0	0	0	0	0	0	0	0	0	0	0	0	0	CSQ=A|intron_variant|MODIFIER|ASB11|ENSG00000165192|Transcript|ENST00000344384.8|protein_coding||1/6||||||||rs1286072431||-1||HGNC|HGNC:17186||5|A1||||||||||||||||||||||||||1.620|-0.014942|0.868|,A|intron_variant|MODIFIER|ASB11|ENSG00000165192|Transcript|ENST00000380470.7|protein_coding||1/6||||||||rs1286072431||-1||HGNC|HGNC:17186||1|||||||||||||||||||||||||||1.620|-0.014942|0.868|,A|intron_vari…	N	N	1.62	0.868	N	N
X	15309141	.	T	C	T	C	0.0002649	0.513692	0.0013089	0	0	0	0	0	N	N	N	N	N	N	N	N	N	N	N	N	N	CSQ=C|intron_variant|MODIFIER|ASB11|ENSG00000165192|Transcript|ENST00000344384.8|protein_coding||1/6||||||||rs771140251||-1||HGNC|HGNC:17186||5|A1|||0.0003|||||||||||||||||||||||4.035|0.197878|0.868|,C|intron_variant|MODIFIER|ASB11|ENSG00000165192|Transcript|ENST00000380470.7|protein_coding||1/6||||||||rs771140251||-1||HGNC|HGNC:17186||1||||0.0003|||||||||||||||||||||||4.035|0.197878|0.868|,C|int…	N	N	4.035	0.868	N	N
X	15309306	rs185377754	A	G	A	G	0.0002649	0.513692	0.0013089	0	0	0	0	0	N	N	N	N	N	N	N	N	N	N	N	N	N	CSQ=G|intron_variant|MODIFIER|ASB11|ENSG00000165192|Transcript|ENST00000344384.8|protein_coding||1/6||||||||rs185377754||-1||HGNC|HGNC:17186||5|A1|||0.0003|0|0|0.0013|0|0||||||||||||||||||3.978|0.193512|0.868|,G|intron_variant|MODIFIER|ASB11|ENSG00000165192|Transcript|ENST00000380470.7|protein_coding||1/6||||||||rs185377754||-1||HGNC|HGNC:17186||1||||0.0003|0|0|0.0013|0|0||||||||||||||||||3.978|0…	N	N	3.978	0.868	N	N
X	15309364	.	T	G	T	G	0.0002649	0.513692	0	0	0.00099701	0	0	0.00099701	N	N	N	N	N	N	N	N	N	N	N	N	N	CSQ=G|intron_variant|MODIFIER|ASB11|ENSG00000165192|Transcript|ENST00000344384.8|protein_coding||1/6||||||||rs759271939||-1||HGNC|HGNC:17186||5|A1|||0.0003|||||||||||||||||||||||4.049|0.198931|0.868|,G|intron_variant|MODIFIER|ASB11|ENSG00000165192|Transcript|ENST00000380470.7|protein_coding||1/6||||||||rs759271939||-1||HGNC|HGNC:17186||1||||0.0003|||||||||||||||||||||||4.049|0.198931|0.868|,G|int…	N	N	4.049	0.868	N	N
X	15309410	.	T	C	T	C	0.00037864	0	0	0	0.00099701	0	0	0.00023793	0	0	0	0	0	0	0	0	0	0	0	0	0	CSQ=C|intron_variant|MODIFIER|ASB11|ENSG00000165192|Transcript|ENST00000344384.8|protein_coding||1/6||||||||rs765095102||-1||HGNC|HGNC:17186||5|A1|||0.0003|||||||||||||||||||||||13.09|1.096542|0.868|,C|intron_variant|MODIFIER|ASB11|ENSG00000165192|Transcript|ENST00000380470.7|protein_coding||1/6||||||||rs765095102||-1||HGNC|HGNC:17186||1||||0.0003|||||||||||||||||||||||13.09|1.096542|0.868|,C|int…	N	N	13.09	0.868	N	N
X	15309414	.	G	C	G	C	0.00211921	0.513692	0	0	0	0	0.0111421	0	N	N	N	N	N	N	N	N	N	N	N	N	N	CSQ=C|intron_variant|MODIFIER|ASB11|ENSG00000165192|Transcript|ENST00000344384.8|protein_coding||1/6||||||||rs775462023||-1||HGNC|HGNC:17186||5|A1|||0.0021|||||||||||||||||||||||11.94|0.984155|0.868|,C|intron_variant|MODIFIER|ASB11|ENSG00000165192|Transcript|ENST00000380470.7|protein_coding||1/6||||||||rs775462023||-1||HGNC|HGNC:17186||1||||0.0021|||||||||||||||||||||||11.94|0.984155|0.868|,C|int…	N	N	11.94	0.868	N	N
X	15309469	rs190873766	T	A	T	A	0.00201944	0	0	0	0.0119641	0	0	0.0038068	0	0.00581395	0	0	0	0.0121951	0	0	0	0	0.0041841	0	0	CSQ=A|intron_variant|MODIFIER|ASB11|ENSG00000165192|Transcript|ENST00000344384.8|protein_coding||1/6||||||||rs190873766||-1||HGNC|HGNC:17186||5|A1|||0.0032|0.012|0|0|0|0||||||||||||||||||2.649|0.087755|0.868|,A|intron_variant|MODIFIER|ASB11|ENSG00000165192|Transcript|ENST00000380470.7|protein_coding||1/6||||||||rs190873766||-1||HGNC|HGNC:17186||1||||0.0032|0.012|0|0|0|0||||||||||||||||||2.649|0.0…	N	N	2.649	0.868	N	N
X	15309511	.	A	G	A	G	0.00024108	0.486308	N	N	N	N	N	0.0003125	0	0	0	0	0	0.0121951	0	0	0	0	0	0	0	CSQ=G|intron_variant|MODIFIER|ASB11|ENSG00000165192|Transcript|ENST00000344384.8|protein_coding||1/6||||||||rs997574846||-1||HGNC|HGNC:17186||5|A1||||||||||||||||||||||||||5.285|0.298754|0.868|,G|intron_variant|MODIFIER|ASB11|ENSG00000165192|Transcript|ENST00000380470.7|protein_coding||1/6||||||||rs997574846||-1||HGNC|HGNC:17186||1|||||||||||||||||||||||||||5.285|0.298754|0.868|,G|intron_variant|…	N	N	5.285	0.868	N	N
X	15309548	.	A	C	A	C	0.00214565	0	0	0	0.00398804	0	0	0.00404473	0	0.00581395	0	0	0	0	0	0.0234542	0	0	0	0	0	CSQ=C|intron_variant|MODIFIER|ASB11|ENSG00000165192|Transcript|ENST00000344384.8|protein_coding||1/6||||||||rs763705026||-1||HGNC|HGNC:17186||5|A1|||0.0011|||||||||||||||||||||||1.074|-0.088616|0.868|,C|intron_variant|MODIFIER|ASB11|ENSG00000165192|Transcript|ENST00000380470.7|protein_coding||1/6||||||||rs763705026||-1||HGNC|HGNC:17186||1||||0.0011|||||||||||||||||||||||1.074|-0.088616|0.868|,C|i…	N	N	1.074	0.868	N	N
X	15309563	rs369472683	C	T	C	T	0.00771456	0.486308	N	N	N	N	N	0.0096875	0.00414938	0	0	0	0	0	0	0	0	0.0474383	0	0.0344828	0	CSQ=T|intron_variant|MODIFIER|ASB11|ENSG00000165192|Transcript|ENST00000344384.8|protein_coding||1/6||||||||rs369472683||-1||HGNC|HGNC:17186||5|A1||||||||||||||||||||||||||1.621|-0.014803|0.868|,T|intron_variant|MODIFIER|ASB11|ENSG00000165192|Transcript|ENST00000380470.7|protein_coding||1/6||||||||rs369472683||-1||HGNC|HGNC:17186||1|||||||||||||||||||||||||||1.621|-0.014803|0.868|,T|intron_varian…	N	N	1.621	0.868	N	N
X	15309585	rs12557809	G	T	G	T	0.128992	0	0.515707	0.17624	0.0368893	0.364504	0.14624	0.0387818	0.06639	0.0755814	0.0196078	0.0740741	0	0.0731707	0.0735695	0.00852878	0	0.00379507	0.0125523	0.0551724	0	CSQ=T|intron_variant|MODIFIER|ASB11|ENSG00000165192|Transcript|ENST00000344384.8|protein_coding||1/6||||||||rs12557809||-1||HGNC|HGNC:17186||5|A1|||0.2283|0.0369|0.3645|0.5157|0.1762|0.1462||||||||||||||||||0.579|-0.188840|0.868|,T|intron_variant|MODIFIER|ASB11|ENSG00000165192|Transcript|ENST00000380470.7|protein_coding||1/6||||||||rs12557809||-1||HGNC|HGNC:17186||1||||0.2283|0.0369|0.3645|0.5157…	N	N	0.579	0.868	N	N
X	15309633	.	C	T	C	T	0.0008835	0	0	0	0.00099701	0	0	0.00142755	0	0.0145349	0	0	0	0	0	0	0	0	0	0	0	CSQ=T|intron_variant|MODIFIER|ASB11|ENSG00000165192|Transcript|ENST00000344384.8|protein_coding||1/6||||||||rs757035178||-1||HGNC|HGNC:17186||5|A1|||0.0003|||||||||||||||||||||||1.018|-0.097724|0.868|,T|intron_variant|MODIFIER|ASB11|ENSG00000165192|Transcript|ENST00000380470.7|protein_coding||1/6||||||||rs757035178||-1||HGNC|HGNC:17186||1||||0.0003|||||||||||||||||||||||1.018|-0.097724|0.868|,T|i…	N	N	1.018	0.868	N	N
X	15309739	.	G	A	G	A	0.00313404	0.486308	N	N	N	N	N	0.0034375	0	0.00581395	0	0	0	0	0	0.0191898	0	0	0	0	0	CSQ=A|intron_variant|MODIFIER|ASB11|ENSG00000165192|Transcript|ENST00000344384.8|protein_coding||1/6||||||||||-1||HGNC|HGNC:17186||5|A1||||||||||||||||||||||||||0.229|-0.317805|0.868|,A|intron_variant|MODIFIER|ASB11|ENSG00000165192|Transcript|ENST00000380470.7|protein_coding||1/6||||||||||-1||HGNC|HGNC:17186||1|||||||||||||||||||||||||||0.229|-0.317805|0.868|,A|intron_variant|MODIFIER|ASB11|ENSG0…	N	N	0.229	0.868	N	N
X	15309757	.	G	A	G	A	0.00037864	0	0	0	0.00199402	0	0	0.00071378	0.00414938	0	0	0	0	0	0	0	0	0	0	0	0	CSQ=A|intron_variant|MODIFIER|ASB11|ENSG00000165192|Transcript|ENST00000344384.8|protein_coding||1/6||||||||rs767263863||-1||HGNC|HGNC:17186||5|A1|||0.0005|||||||||||||||||||||||1.917|0.017914|0.868|,A|intron_variant|MODIFIER|ASB11|ENSG00000165192|Transcript|ENST00000380470.7|protein_coding||1/6||||||||rs767263863||-1||HGNC|HGNC:17186||1||||0.0005|||||||||||||||||||||||1.917|0.017914|0.868|,A|int…	N	N	1.917	0.868	N	N
X	15309795	.	A	G	G	G	0.00072324	0.486308	N	N	N	N	N	0.0009375	0	0	0	0	0	0	0.0027248	0	0	0	0	0	0.0188679	CSQ=G|intron_variant|MODIFIER|ASB11|ENSG00000165192|Transcript|ENST00000344384.8|protein_coding||1/6||||||||||-1||HGNC|HGNC:17186||5|A1||||||||||||||||||||||||||2.882|0.107504|0.868|,G|intron_variant|MODIFIER|ASB11|ENSG00000165192|Transcript|ENST00000380470.7|protein_coding||1/6||||||||||-1||HGNC|HGNC:17186||1|||||||||||||||||||||||||||2.882|0.107504|0.868|,G|intron_variant|MODIFIER|ASB11|ENSG000…	N	N	2.882	0.868	N	N
X	15309828	rs181936570	C	T	C	T	0.00164079	0	0	0	0.00598205	0	0	0.00142755	0	0	0	0	0	0	0	0	0	0	0	0	0	CSQ=T|intron_variant|MODIFIER|ASB11|ENSG00000165192|Transcript|ENST00000344384.8|protein_coding||1/6||||||||rs181936570||-1||HGNC|HGNC:17186||5|A1|||0.0016|0.006|0|0|0|0||||||||||||||||||0.144|-0.377115|0.868|,T|intron_variant|MODIFIER|ASB11|ENSG00000165192|Transcript|ENST00000380470.7|protein_coding||1/6||||||||rs181936570||-1||HGNC|HGNC:17186||1||||0.0016|0.006|0|0|0|0||||||||||||||||||0.144|-0…	N	N	0.144	0.868	N	N
X	15309836	rs372476532	C	T	C	T	0.00795564	0.486308	N	N	N	N	N	0.01	0.00414938	0	0	0	0.00826446	0	0	0	0	0.0474383	0	0.0344828	0	CSQ=T|intron_variant|MODIFIER|ASB11|ENSG00000165192|Transcript|ENST00000344384.8|protein_coding||1/6||||||||rs372476532||-1||HGNC|HGNC:17186||5|A1||||||||||||||||||||||||||0.960|-0.107621|0.868|,T|intron_variant|MODIFIER|ASB11|ENSG00000165192|Transcript|ENST00000380470.7|protein_coding||1/6||||||||rs372476532||-1||HGNC|HGNC:17186||1|||||||||||||||||||||||||||0.960|-0.107621|0.868|,T|intron_varian…	N	N	0.96	0.868	N	N
X	15309840	.	C	T	C	T	0.00238411	0.513692	0	0.00522193	0	0.00954198	0	0	N	N	N	N	N	N	N	N	N	N	N	N	N	CSQ=T|intron_variant|MODIFIER|ASB11|ENSG00000165192|Transcript|ENST00000344384.8|protein_coding||1/6||||||||rs755302907||-1||HGNC|HGNC:17186||5|A1|||0.0024|||||||||||||||||||||||2.081|0.034784|0.868|,T|intron_variant|MODIFIER|ASB11|ENSG00000165192|Transcript|ENST00000380470.7|protein_coding||1/6||||||||rs755302907||-1||HGNC|HGNC:17186||1||||0.0024|||||||||||||||||||||||2.081|0.034784|0.868|,T|int…	N	N	2.081	0.868	N	N
X	15309878	.	G	A	G	A	0.0007947	0.513692	0	0	0	0	0.00417827	0	N	N	N	N	N	N	N	N	N	N	N	N	N	CSQ=A|intron_variant|MODIFIER|ASB11|ENSG00000165192|Transcript|ENST00000344384.8|protein_coding||1/6||||||||rs779319818||-1||HGNC|HGNC:17186||5|A1|||0.0008|||||||||||||||||||||||0.553|-0.195724|0.868|,A|intron_variant|MODIFIER|ASB11|ENSG00000165192|Transcript|ENST00000380470.7|protein_coding||1/6||||||||rs779319818||-1||HGNC|HGNC:17186||1||||0.0008|||||||||||||||||||||||0.553|-0.195724|0.868|,A|i…	N	N	0.553	0.868	N	N
X	15309907	.	G	A	G	A	0.00385728	0.486308	N	N	N	N	N	0.0040625	0.00414938	0	0	0.0185185	0	0	0.013624	0	0	0	0	0	0.0188679	CSQ=A|intron_variant|MODIFIER|ASB11|ENSG00000165192|Transcript|ENST00000344384.8|protein_coding||1/6||||||||||-1||HGNC|HGNC:17186||5|A1||||||||||||||||||||||||||2.518|0.076142|0.868|,A|intron_variant|MODIFIER|ASB11|ENSG00000165192|Transcript|ENST00000380470.7|protein_coding||1/6||||||||||-1||HGNC|HGNC:17186||1|||||||||||||||||||||||||||2.518|0.076142|0.868|,A|intron_variant|MODIFIER|ASB11|ENSG000…	N	N	2.518	0.868	N	N
X	15309912	.	G	T	G	T	0.00048216	0.486308	N	N	N	N	N	0.000625	0	0	0	0.0185185	0	0	0.0013624	0	0	0	0	0	0	CSQ=T|intron_variant|MODIFIER|ASB11|ENSG00000165192|Transcript|ENST00000344384.8|protein_coding||1/6||||||||||-1||HGNC|HGNC:17186||5|A1||||||||||||||||||||||||||1.298|-0.055605|0.868|,T|intron_variant|MODIFIER|ASB11|ENSG00000165192|Transcript|ENST00000380470.7|protein_coding||1/6||||||||||-1||HGNC|HGNC:17186||1|||||||||||||||||||||||||||1.298|-0.055605|0.868|,T|intron_variant|MODIFIER|ASB11|ENSG0…	N	N	1.298	0.868	N	N
X	15309917	.	G	A	G	A	0.00506268	0.486308	N	N	N	N	N	0.004375	0	0	0.0196078	0	0.0909091	0	0	0	0	0	0	0	0	CSQ=A|intron_variant|MODIFIER|ASB11|ENSG00000165192|Transcript|ENST00000344384.8|protein_coding||1/6||||||||rs1045485005||-1||HGNC|HGNC:17186||5|A1||||||||||||||||||||||||||1.464|-0.033871|0.868|,A|intron_variant|MODIFIER|ASB11|ENSG00000165192|Transcript|ENST00000380470.7|protein_coding||1/6||||||||rs1045485005||-1||HGNC|HGNC:17186||1|||||||||||||||||||||||||||1.464|-0.033871|0.868|,A|intron_vari…	N	N	1.464	0.868	N	N
X	15309923	rs112312321	G	A	G	A	0.273381	0	0.422775	0.387728	0.140578	0.284351	0.623955	0.176065	0.236515	0.142442	0.169935	0.203704	0.31405	0.170732	0.252044	0.0362473	0.236842	0.197343	0.179916	0.248276	0.188679	CSQ=A|intron_variant|MODIFIER|ASB11|ENSG00000165192|Transcript|ENST00000344384.8|protein_coding||1/6||||||||rs112312321||-1||HGNC|HGNC:17186||5|A1|||0.3597|0.1406|0.2844|0.4228|0.3877|0.624||||||||||||||||||0.313|-0.276798|0.868|,A|intron_variant|MODIFIER|ASB11|ENSG00000165192|Transcript|ENST00000380470.7|protein_coding||1/6||||||||rs112312321||-1||HGNC|HGNC:17186||1||||0.3597|0.1406|0.2844|0.422…	N	N	0.313	0.868	N	N
X	15309924	.	C	T	C	T	0.00144648	0.486308	N	N	N	N	N	0.0015625	0.00829876	0	0	0	0	0	0.00408719	0	0	0	0	0	0	CSQ=T|intron_variant|MODIFIER|ASB11|ENSG00000165192|Transcript|ENST00000344384.8|protein_coding||1/6||||||||rs1372829319||-1||HGNC|HGNC:17186||5|A1||||||||||||||||||||||||||0.380|-0.250325|0.868|,T|intron_variant|MODIFIER|ASB11|ENSG00000165192|Transcript|ENST00000380470.7|protein_coding||1/6||||||||rs1372829319||-1||HGNC|HGNC:17186||1|||||||||||||||||||||||||||0.380|-0.250325|0.868|,T|intron_vari…	N	N	0.38	0.868	N	N
X	15309946	.	C	CGACA	C	CGACA	0.00289575	0.486696	N	N	N	N	N	0.00312891	0.0041841	0	0	0	0	0	0.010929	0	0	0	0	0.00689655	0	CSQ=GACA|intron_variant|MODIFIER|ASB11|ENSG00000165192|Transcript|ENST00000344384.8|protein_coding||1/6||||||||rs1217771183||-1||HGNC|HGNC:17186||5|A1||||||||||||||||||||||||||1.006|-0.099754|0.868|,GACA|intron_variant|MODIFIER|ASB11|ENSG00000165192|Transcript|ENST00000380470.7|protein_coding||1/6||||||||rs1217771183||-1||HGNC|HGNC:17186||1|||||||||||||||||||||||||||1.006|-0.099754|0.868|,GACA|in…	N	N	1.006	0.868	N	N
X	15309967	rs373818091	C	CAAAAAA	C	C	0.330331	0.513692	0.346859	0.475196	0.256231	0.396947	0.213092	0.256231	N	N	N	N	N	N	N	N	N	N	N	N	N	CSQ=AAAAAA|intron_variant|MODIFIER|ASB11|ENSG00000165192|Transcript|ENST00000344384.8|protein_coding||1/6||||||||rs60765469||-1||HGNC|HGNC:17186||5|A1||||||||||||||||||||||||||3.190|0.132487|0.868|,AAAAAA|intron_variant|MODIFIER|ASB11|ENSG00000165192|Transcript|ENST00000380470.7|protein_coding||1/6||||||||rs60765469||-1||HGNC|HGNC:17186||1|||||||||||||||||||||||||||3.190|0.132487|0.868|,AAAAAA|in…	N	N	3.19	0.868	N	N
X	15309974	.	A	AAAAAAAC	A	AAAAAAAC	0.00024108	0.486308	N	N	N	N	N	0.0003125	0	0	0	0	0	0	0	0.0021322	0	0	0	0	0	CSQ=AAAAAAC|intron_variant|MODIFIER|ASB11|ENSG00000165192|Transcript|ENST00000344384.8|protein_coding||1/6||||||||||-1||HGNC|HGNC:17186||5|A1||||||||||||||||||||||||||||0.868|,AAAAAAC|intron_variant|MODIFIER|ASB11|ENSG00000165192|Transcript|ENST00000380470.7|protein_coding||1/6||||||||||-1||HGNC|HGNC:17186||1|||||||||||||||||||||||||||||0.868|,AAAAAAC|intron_variant|MODIFIER|ASB11|ENSG00000165192…	N	N	N	0.868	N	N
X	15309984	.	A	AAAACAAAAAAAAAAC	A	AAAACAAAAAAAAAAC	0.00024108	0.486308	N	N	N	N	N	0	0	0	0	0	0	0	0	0	0	0	0	0	0	CSQ=AAACAAAAAAAAAAC|intron_variant|MODIFIER|ASB11|ENSG00000165192|Transcript|ENST00000344384.8|protein_coding||1/6||||||||||-1||HGNC|HGNC:17186||5|A1||||||||||||||||||||||||||||0.868|,AAACAAAAAAAAAAC|intron_variant|MODIFIER|ASB11|ENSG00000165192|Transcript|ENST00000380470.7|protein_coding||1/6||||||||||-1||HGNC|HGNC:17186||1|||||||||||||||||||||||||||||0.868|,AAACAAAAAAAAAAC|intron_variant|MODIFI…	N	N	N	0.868	N	N
X	15310024	.	G	A	G	A	0.0002649	0.513692	0	0.00130548	0	0	0	0	N	N	N	N	N	N	N	N	N	N	N	N	N	CSQ=A|intron_variant|MODIFIER|ASB11|ENSG00000165192|Transcript|ENST00000344384.8|protein_coding||1/6||||||||rs777894017||-1||HGNC|HGNC:17186||5|A1|||0.0003|||||||||||||||||||||||0.882|-0.121865|0.868|,A|intron_variant|MODIFIER|ASB11|ENSG00000165192|Transcript|ENST00000380470.7|protein_coding||1/6||||||||rs777894017||-1||HGNC|HGNC:17186||1||||0.0003|||||||||||||||||||||||0.882|-0.121865|0.868|,A|i…	N	N	0.882	0.868	N	N
X	15310095	.	G	C	G	C	0.0013245	0.513692	0	0	0	0	0.00696379	0	N	N	N	N	N	N	N	N	N	N	N	N	N	CSQ=C|intron_variant|MODIFIER|ASB11|ENSG00000165192|Transcript|ENST00000344384.8|protein_coding||1/6||||||||rs536473916||-1||HGNC|HGNC:17186||5|A1|||0.0013|||||||||||||||||||||||5.692|0.334777|0.868|,C|intron_variant|MODIFIER|ASB11|ENSG00000165192|Transcript|ENST00000380470.7|protein_coding||1/6||||||||rs536473916||-1||HGNC|HGNC:17186||1||||0.0013|||||||||||||||||||||||5.692|0.334777|0.868|,C|int…	N	N	5.692	0.868	N	N
X	15310116	.	T	C	T	C	0.00048216	0.486308	N	N	N	N	N	0.000625	0.00414938	0.00290698	0	0	0	0	0	0	0	0	0	0	0	CSQ=C|intron_variant|MODIFIER|ASB11|ENSG00000165192|Transcript|ENST00000344384.8|protein_coding||1/6||||||||rs1396009836||-1||HGNC|HGNC:17186||5|A1||||||||||||||||||||||||||9.312|0.733689|0.868|,C|intron_variant|MODIFIER|ASB11|ENSG00000165192|Transcript|ENST00000380470.7|protein_coding||1/6||||||||rs1396009836||-1||HGNC|HGNC:17186||1|||||||||||||||||||||||||||9.312|0.733689|0.868|,C|intron_varian…	N	N	9.312	0.868	N	N
X	15310144	rs142160812	G	A	G	A	0.00164079	0	0	0	0.00598205	0	0	0.00142755	0	0	0	0	0	0	0	0	0	0	0	0	0	CSQ=A|intron_variant|MODIFIER|ASB11|ENSG00000165192|Transcript|ENST00000344384.8|protein_coding||1/6||||||||rs142160812||-1||HGNC|HGNC:17186||5|A1|||0.0016|0.006|0|0|0|0||||||||||||||||||6.666|0.429093|0.868|,A|intron_variant|MODIFIER|ASB11|ENSG00000165192|Transcript|ENST00000380470.7|protein_coding||1/6||||||||rs142160812||-1||HGNC|HGNC:17186||1||||0.0016|0.006|0|0|0|0||||||||||||||||||6.666|0.4…	N	N	6.666	0.868	N	N
X	15310234	.	G	C	G	C	0.0002649	0.513692	0.0013089	0	0	0	0	0	N	N	N	N	N	N	N	N	N	N	N	N	N	CSQ=C|intron_variant|MODIFIER|ASB11|ENSG00000165192|Transcript|ENST00000344384.8|protein_coding||1/6||||||||rs776764799||-1||HGNC|HGNC:17186||5|A1|||0.0003|||||||||||||||||||||||10.52|0.858740|0.868|,C|intron_variant|MODIFIER|ASB11|ENSG00000165192|Transcript|ENST00000380470.7|protein_coding||1/6||||||||rs776764799||-1||HGNC|HGNC:17186||1||||0.0003|||||||||||||||||||||||10.52|0.858740|0.868|,C|int…	N	N	10.52	0.868	N	N
X	15310262	rs187668974	T	A	T	A	0.00643696	0	0	0	0.0109671	0.0019084	0	0.00975494	0	0.0145349	0	0	0.00826446	0	0	0.0405117	0	0.00379507	0	0.0206897	0	CSQ=A|intron_variant|MODIFIER|ASB11|ENSG00000165192|Transcript|ENST00000344384.8|protein_coding||1/6||||||||rs187668974||-1||HGNC|HGNC:17186||5|A1|||0.0032|0.011|0.0019|0|0|0||||||||||||||||||18.24|1.927457|0.868|,A|intron_variant|MODIFIER|ASB11|ENSG00000165192|Transcript|ENST00000380470.7|protein_coding||1/6||||||||rs187668974||-1||HGNC|HGNC:17186||1||||0.0032|0.011|0.0019|0|0|0|||||||||||||||||…	N	N	18.24	0.868	N	N
X	15310371	.	G	A	G	A	0.0002649	0.513692	0	0	0.00099701	0	0	0.00099701	N	N	N	N	N	N	N	N	N	N	N	N	N	CSQ=A|intron_variant|MODIFIER|ASB11|ENSG00000165192|Transcript|ENST00000344384.8|protein_coding||1/6||||||||rs769578751||-1||HGNC|HGNC:17186||5|A1|||0.0003|||||||||||||||||||||||2.981|0.115719|0.868|,A|intron_variant|MODIFIER|ASB11|ENSG00000165192|Transcript|ENST00000380470.7|protein_coding||1/6||||||||rs769578751||-1||HGNC|HGNC:17186||1||||0.0003|||||||||||||||||||||||2.981|0.115719|0.868|,A|int…	N	N	2.981	0.868	N	N
X	15310404	.	G	A	G	A	0.00317881	0.513692	0	0	0	0	0.0167131	0	N	N	N	N	N	N	N	N	N	N	N	N	N	CSQ=A|intron_variant|MODIFIER|ASB11|ENSG00000165192|Transcript|ENST00000344384.8|protein_coding||1/6||||||||rs775128998||-1||HGNC|HGNC:17186||5|A1|||0.0032|||||||||||||||||||||||9.747|0.781272|0.868|,A|intron_variant|MODIFIER|ASB11|ENSG00000165192|Transcript|ENST00000380470.7|protein_coding||1/6||||||||rs775128998||-1||HGNC|HGNC:17186||1||||0.0032|||||||||||||||||||||||9.747|0.781272|0.868|,A|int…	N	N	9.747	0.868	N	N
X	15310427	.	T	C	T	C	0.00024108	0.486308	N	N	N	N	N	0.0003125	0	0	0	0	0	0	0.0013624	0	0	0	0	0	0	CSQ=C|intron_variant|MODIFIER|ASB11|ENSG00000165192|Transcript|ENST00000344384.8|protein_coding||1/6||||||||||-1||HGNC|HGNC:17186||5|A1||||||||||||||||||||||||||12.21|1.006639|0.868|,C|intron_variant|MODIFIER|ASB11|ENSG00000165192|Transcript|ENST00000380470.7|protein_coding||1/6||||||||||-1||HGNC|HGNC:17186||1|||||||||||||||||||||||||||12.21|1.006639|0.868|,C|intron_variant|MODIFIER|ASB11|ENSG000…	N	N	12.21	0.868	N	N
X	15310447	.	G	A	G	A	0.00024108	0.486308	N	N	N	N	N	0.0003125	0	0	0	0	0.00826446	0	0	0	0	0	0	0	0	CSQ=A|intron_variant|MODIFIER|ASB11|ENSG00000165192|Transcript|ENST00000344384.8|protein_coding||1/6||||||||||-1||HGNC|HGNC:17186||5|A1||||||||||||||||||||||||||0.632|-0.175306|0.868|,A|intron_variant|MODIFIER|ASB11|ENSG00000165192|Transcript|ENST00000380470.7|protein_coding||1/6||||||||||-1||HGNC|HGNC:17186||1|||||||||||||||||||||||||||0.632|-0.175306|0.868|,A|intron_variant|MODIFIER|ASB11|ENSG0…	N	N	0.632	0.868	N	N
X	15310470	rs191514092	A	C	A	C	0.0002649	0.513692	0	0	0	0.0019084	0	0	N	N	N	N	N	N	N	N	N	N	N	N	N	CSQ=C|intron_variant|MODIFIER|ASB11|ENSG00000165192|Transcript|ENST00000344384.8|protein_coding||1/6||||||||rs191514092||-1||HGNC|HGNC:17186||5|A1|||0.0003|0|0.0019|0|0|0||||||||||||||||||9.947|0.801979|0.868|,C|intron_variant|MODIFIER|ASB11|ENSG00000165192|Transcript|ENST00000380470.7|protein_coding||1/6||||||||rs191514092||-1||HGNC|HGNC:17186||1||||0.0003|0|0.0019|0|0|0||||||||||||||||||9.947|0…	N	N	9.947	0.868	N	N
X	15310552	.	G	A	G	A	0.00144648	0.486308	N	N	N	N	N	0.0015625	0	0.00290698	0	0	0	0	0	0.00852878	0	0	0	0	0	CSQ=A|intron_variant|MODIFIER|ASB11|ENSG00000165192|Transcript|ENST00000344384.8|protein_coding||1/6||||||||rs918986862||-1||HGNC|HGNC:17186||5|A1||||||||||||||||||||||||||0.413|-0.238596|0.868|,A|intron_variant|MODIFIER|ASB11|ENSG00000165192|Transcript|ENST00000380470.7|protein_coding||1/6||||||||rs918986862||-1||HGNC|HGNC:17186||1|||||||||||||||||||||||||||0.413|-0.238596|0.868|,A|intron_varian…	N	N	0.413	0.868	N	N
X	15310563	rs183776102	A	T	A	T	0.0002649	0.513692	0	0.00130548	0	0	0	0	N	N	N	N	N	N	N	N	N	N	N	N	N	CSQ=T|intron_variant|MODIFIER|ASB11|ENSG00000165192|Transcript|ENST00000344384.8|protein_coding||1/6||||||||rs183776102||-1||HGNC|HGNC:17186||5|A1|||0.0003|0|0|0|0.0013|0||||||||||||||||||3.069|0.122794|0.868|,T|intron_variant|MODIFIER|ASB11|ENSG00000165192|Transcript|ENST00000380470.7|protein_coding||1/6||||||||rs183776102||-1||HGNC|HGNC:17186||1||||0.0003|0|0|0|0.0013|0||||||||||||||||||3.069|0…	N	N	3.069	0.868	N	N
X	15310576	.	C	G	C	G	0.0005298	0.513692	0	0	0.00199402	0	0	0.00199402	N	N	N	N	N	N	N	N	N	N	N	N	N	CSQ=G|intron_variant|MODIFIER|ASB11|ENSG00000165192|Transcript|ENST00000344384.8|protein_coding||1/6||||||||rs774065680||-1||HGNC|HGNC:17186||5|A1|||0.0005|||||||||||||||||||||||7.027|0.467062|0.868|,G|intron_variant|MODIFIER|ASB11|ENSG00000165192|Transcript|ENST00000380470.7|protein_coding||1/6||||||||rs774065680||-1||HGNC|HGNC:17186||1||||0.0005|||||||||||||||||||||||7.027|0.467062|0.868|,G|int…	N	N	7.027	0.868	N	N
X	15310589	.	GCTGT	G	G	G	0.00037864	0	0	0	0	0	0.00278552	0.00023793	0	0	0	0	0	0	0.0013624	0	0	0	0	0	0	CSQ=-|intron_variant|MODIFIER|ASB11|ENSG00000165192|Transcript|ENST00000344384.8|protein_coding||1/6||||||||rs761350372||-1||HGNC|HGNC:17186||5|A1||||||||||||||||||||||||||||0.868|,-|intron_variant|MODIFIER|ASB11|ENSG00000165192|Transcript|ENST00000380470.7|protein_coding||1/6||||||||rs761350372||-1||HGNC|HGNC:17186||1|||||||||||||||||||||||||||||0.868|,-|intron_variant|MODIFIER|ASB11|ENSG0000016…	N	N	N	0.868	N	N
X	15310630	.	CTG	C	C	C	0.00216972	0.486308	N	N	N	N	N	0.0025	0	0	0	0.0185185	0	0.0609756	0.0027248	0	0	0	0	0	0	CSQ=-|intron_variant|MODIFIER|ASB11|ENSG00000165192|Transcript|ENST00000344384.8|protein_coding||1/6||||||||rs1168485702||-1||HGNC|HGNC:17186||5|A1||||||||||||||||||||||||||1.331|-0.051164|0.868|,-|intron_variant|MODIFIER|ASB11|ENSG00000165192|Transcript|ENST00000380470.7|protein_coding||1/6||||||||rs1168485702||-1||HGNC|HGNC:17186||1|||||||||||||||||||||||||||1.331|-0.051164|0.868|,-|intron_vari…	N	N	1.331	0.868	N	N
X	15310707	.	G	A	G	A	0.00072324	0.486308	N	N	N	N	N	0	0	0	0	0	0	0	0	0	0	0	0	0	0	CSQ=A|intron_variant|MODIFIER|ASB11|ENSG00000165192|Transcript|ENST00000344384.8|protein_coding||1/6||||||||rs901792081||-1||HGNC|HGNC:17186||5|A1||||||||||||||||||||||||||1.541|-0.024332|0.868|,A|intron_variant|MODIFIER|ASB11|ENSG00000165192|Transcript|ENST00000380470.7|protein_coding||1/6||||||||rs901792081||-1||HGNC|HGNC:17186||1|||||||||||||||||||||||||||1.541|-0.024332|0.868|,A|intron_varian…	N	N	1.541	0.868	N	N
X	15310710	.	G	A	G	A	0.00024108	0.486308	N	N	N	N	N	0.0003125	0	0	0	0	0.00826446	0	0	0	0	0	0	0	0	CSQ=A|intron_variant|MODIFIER|ASB11|ENSG00000165192|Transcript|ENST00000344384.8|protein_coding||1/6||||||||rs900077011||-1||HGNC|HGNC:17186||5|A1||||||||||||||||||||||||||0.183|-0.346681|0.868|,A|intron_variant|MODIFIER|ASB11|ENSG00000165192|Transcript|ENST00000380470.7|protein_coding||1/6||||||||rs900077011||-1||HGNC|HGNC:17186||1|||||||||||||||||||||||||||0.183|-0.346681|0.868|,A|intron_varian…	N	N	0.183	0.868	N	N
X	15310713	rs370004685	C	T	C	T	0.0159113	0.486308	N	N	N	N	N	0.01875	0.0414938	0	0.0196078	0.037037	0.0330578	0	0.0190736	0	0	0.0265655	0	0.0896552	0	CSQ=T|intron_variant|MODIFIER|ASB11|ENSG00000165192|Transcript|ENST00000344384.8|protein_coding||1/6||||||||rs370004685||-1||HGNC|HGNC:17186||5|A1||||||||||||||||||||||||||0.383|-0.249004|0.868|,T|intron_variant|MODIFIER|ASB11|ENSG00000165192|Transcript|ENST00000380470.7|protein_coding||1/6||||||||rs370004685||-1||HGNC|HGNC:17186||1|||||||||||||||||||||||||||0.383|-0.249004|0.868|,T|intron_varian…	N	N	0.383	0.868	N	N
X	15310736	.	C	T	C	T	0.0002649	0.513692	0	0	0.00099701	0	0	0.00099701	N	N	N	N	N	N	N	N	N	N	N	N	N	CSQ=T|intron_variant|MODIFIER|ASB11|ENSG00000165192|Transcript|ENST00000344384.8|protein_coding||1/6||||||||rs767284349||-1||HGNC|HGNC:17186||5|A1|||0.0003|||||||||||||||||||||||0.631|-0.175683|0.868|,T|intron_variant|MODIFIER|ASB11|ENSG00000165192|Transcript|ENST00000380470.7|protein_coding||1/6||||||||rs767284349||-1||HGNC|HGNC:17186||1||||0.0003|||||||||||||||||||||||0.631|-0.175683|0.868|,T|i…	N	N	0.631	0.868	N	N
X	15310748	.	G	A	G	A	0.0002649	0.513692	0.0013089	0	0	0	0	0	N	N	N	N	N	N	N	N	N	N	N	N	N	CSQ=A|intron_variant|MODIFIER|ASB11|ENSG00000165192|Transcript|ENST00000344384.8|protein_coding||1/6||||||||rs750056285||-1||HGNC|HGNC:17186||5|A1|||0.0003|||||||||||||||||||||||1.523|-0.026582|0.868|,A|intron_variant|MODIFIER|ASB11|ENSG00000165192|Transcript|ENST00000380470.7|protein_coding||1/6||||||||rs750056285||-1||HGNC|HGNC:17186||1||||0.0003|||||||||||||||||||||||1.523|-0.026582|0.868|,A|i…	N	N	1.523	0.868	N	N
X	15310768	.	A	G	A	G	0.0002649	0.513692	0	0	0	0.0019084	0	0	N	N	N	N	N	N	N	N	N	N	N	N	N	CSQ=G|intron_variant|MODIFIER|ASB11|ENSG00000165192|Transcript|ENST00000344384.8|protein_coding||1/6||||||||rs755700466||-1||HGNC|HGNC:17186||5|A1|||0.0003|||||||||||||||||||||||2.595|0.083006|0.868|,G|intron_variant|MODIFIER|ASB11|ENSG00000165192|Transcript|ENST00000380470.7|protein_coding||1/6||||||||rs755700466||-1||HGNC|HGNC:17186||1||||0.0003|||||||||||||||||||||||2.595|0.083006|0.868|,G|int…	N	N	2.595	0.868	N	N
X	15310847	rs112613990	T	C	T	C	0.00530102	0	0	0	0.00099701	0	0	0.00737568	0	0	0.0653595	0	0.157025	0	0	0	0	0	0	0.00689655	0	CSQ=C|intron_variant|MODIFIER|ASB11|ENSG00000165192|Transcript|ENST00000344384.8|protein_coding||1/6||||||||rs112613990||-1||HGNC|HGNC:17186||5|A1|||0.0003|0.001|0|0|0|0||||||||||||||||||0.968|-0.106227|0.868|,C|intron_variant|MODIFIER|ASB11|ENSG00000165192|Transcript|ENST00000380470.7|protein_coding||1/6||||||||rs112613990||-1||HGNC|HGNC:17186||1||||0.0003|0.001|0|0|0|0||||||||||||||||||0.968|-0…	N	N	0.968	0.868	N	N
X	15310856	.	G	A	G	A	0.0002649	0.513692	0	0	0	0	0.00139276	0	N	N	N	N	N	N	N	N	N	N	N	N	N	CSQ=A|intron_variant|MODIFIER|ASB11|ENSG00000165192|Transcript|ENST00000344384.8|protein_coding||1/6||||||||rs752998436||-1||HGNC|HGNC:17186||5|A1|||0.0003|||||||||||||||||||||||0.086|-0.441749|0.868|,A|intron_variant|MODIFIER|ASB11|ENSG00000165192|Transcript|ENST00000380470.7|protein_coding||1/6||||||||rs752998436||-1||HGNC|HGNC:17186||1||||0.0003|||||||||||||||||||||||0.086|-0.441749|0.868|,A|i…	N	N	0.086	0.868	N	N
X	15310864	.	G	A	G	A	0.00618453	0	0	0	0	0	0.00139276	0.0102308	0.0124481	0	0	0.0185185	0.00826446	0	0.0435967	0	0.0263158	0	0	0	0.0943396	CSQ=A|intron_variant|MODIFIER|ASB11|ENSG00000165192|Transcript|ENST00000344384.8|protein_coding||1/6||||||||rs759000536||-1||HGNC|HGNC:17186||5|A1|||0.0003|||||||||||||||||||||||0.393|-0.245421|0.868|,A|intron_variant|MODIFIER|ASB11|ENSG00000165192|Transcript|ENST00000380470.7|protein_coding||1/6||||||||rs759000536||-1||HGNC|HGNC:17186||1||||0.0003|||||||||||||||||||||||0.393|-0.245421|0.868|,A|i…	N	N	0.393	0.868	N	N
X	15310935	.	C	T	C	T	0.0013245	0.513692	0	0	0	0	0.00696379	0	N	N	N	N	N	N	N	N	N	N	N	N	N	CSQ=T|intron_variant|MODIFIER|ASB11|ENSG00000165192|Transcript|ENST00000344384.8|protein_coding||1/6||||||||rs778192709||-1||HGNC|HGNC:17186||5|A1|||0.0013|||||||||||||||||||||||0.053|-0.500153|0.868|,T|intron_variant|MODIFIER|ASB11|ENSG00000165192|Transcript|ENST00000380470.7|protein_coding||1/6||||||||rs778192709||-1||HGNC|HGNC:17186||1||||0.0013|||||||||||||||||||||||0.053|-0.500153|0.868|,T|i…	N	N	0.053	0.868	N	N
X	15310974	.	C	T	C	T	0.00168756	0.486308	N	N	N	N	N	0.001875	0	0	0	0.0185185	0	0	0.00408719	0	0.0526316	0	0	0	0	CSQ=T|intron_variant|MODIFIER|ASB11|ENSG00000165192|Transcript|ENST00000344384.8|protein_coding||1/6||||||||rs1345086866||-1||HGNC|HGNC:17186||5|A1||||||||||||||||||||||||||0.014|-0.665847|0.868|,T|intron_variant|MODIFIER|ASB11|ENSG00000165192|Transcript|ENST00000380470.7|protein_coding||1/6||||||||rs1345086866||-1||HGNC|HGNC:17186||1|||||||||||||||||||||||||||0.014|-0.665847|0.868|,T|intron_vari…	N	N	0.014	0.868	N	N
X	15310982	rs5935943	C	T	C	T	0.273381	0	0.422775	0.387728	0.140578	0.282443	0.623955	0.176065	0.236515	0.142442	0.169935	0.203704	0.31405	0.170732	0.252044	0.0362473	0.236842	0.197343	0.179916	0.248276	0.188679	CSQ=T|intron_variant|MODIFIER|ASB11|ENSG00000165192|Transcript|ENST00000344384.8|protein_coding||1/6||||||||rs5935943||-1||HGNC|HGNC:17186||5|A1|||0.3595|0.1406|0.2824|0.4228|0.3877|0.624||||||||||||||||||0.096|-0.426948|0.868|,T|intron_variant|MODIFIER|ASB11|ENSG00000165192|Transcript|ENST00000380470.7|protein_coding||1/6||||||||rs5935943||-1||HGNC|HGNC:17186||1||||0.3595|0.1406|0.2824|0.4228|0.…	N	N	0.096	0.868	N	N
X	15311173	rs7066009	T	C	T	C	0.280576	0	0.0104712	0.0822454	0.37986	0.0744275	0.135097	0.405425	0.290456	0.473837	0.444444	0.259259	0.561983	0.573171	0.196185	0.750533	0.342105	0.44592	0.364017	0.324138	0.283019	CSQ=C|intron_variant|MODIFIER|ASB11|ENSG00000165192|Transcript|ENST00000344384.8|protein_coding||1/6||||||||rs7066009||-1||HGNC|HGNC:17186||5|A1|||0.1558|0.3799|0.0744|0.0105|0.0822|0.1351||||||||||||||||||1.995|0.026032|0.868|,C|intron_variant|MODIFIER|ASB11|ENSG00000165192|Transcript|ENST00000380470.7|protein_coding||1/6||||||||rs7066009||-1||HGNC|HGNC:17186||1||||0.1558|0.3799|0.0744|0.0105|0.…	N	N	1.995	0.868	N	N
X	15311201	.	T	C	T	C	0.00048216	0.486308	N	N	N	N	N	0.000625	0.00414938	0.00290698	0	0	0	0	0	0	0	0	0	0	0	CSQ=C|intron_variant|MODIFIER|ASB11|ENSG00000165192|Transcript|ENST00000344384.8|protein_coding||1/6||||||||rs1218739237||-1||HGNC|HGNC:17186||5|A1||||||||||||||||||||||||||3.266|0.138509|0.868|,C|intron_variant|MODIFIER|ASB11|ENSG00000165192|Transcript|ENST00000380470.7|protein_coding||1/6||||||||rs1218739237||-1||HGNC|HGNC:17186||1|||||||||||||||||||||||||||3.266|0.138509|0.868|,C|intron_varian…	N	N	3.266	0.868	N	N
X	15311202	.	C	T	C	T	0.0002649	0.513692	0	0	0	0.0019084	0	0	N	N	N	N	N	N	N	N	N	N	N	N	N	CSQ=T|intron_variant|MODIFIER|ASB11|ENSG00000165192|Transcript|ENST00000344384.8|protein_coding||1/6||||||||rs781410649||-1||HGNC|HGNC:17186||5|A1|||0.0003|||||||||||||||||||||||1.431|-0.038074|0.868|,T|intron_variant|MODIFIER|ASB11|ENSG00000165192|Transcript|ENST00000380470.7|protein_coding||1/6||||||||rs781410649||-1||HGNC|HGNC:17186||1||||0.0003|||||||||||||||||||||||1.431|-0.038074|0.868|,T|i…	N	N	1.431	0.868	N	N
X	15311297	.	T	A	T	A	0.0103664	0.486308	N	N	N	N	N	0.0121875	0.0124481	0	0	0.0185185	0.00826446	0	0.0381471	0	0.0263158	0	0	0	0.0943396	CSQ=A|intron_variant|MODIFIER|ASB11|ENSG00000165192|Transcript|ENST00000344384.8|protein_coding||1/6||||||||rs958320307||-1||HGNC|HGNC:17186||5|A1||||||||||||||||||||||||||0.965|-0.106741|0.868|,A|intron_variant|MODIFIER|ASB11|ENSG00000165192|Transcript|ENST00000380470.7|protein_coding||1/6||||||||rs958320307||-1||HGNC|HGNC:17186||1|||||||||||||||||||||||||||0.965|-0.106741|0.868|,A|intron_varian…	N	N	0.965	0.868	N	N
X	15311329	.	G	T	G	T	0.00024108	0.486308	N	N	N	N	N	0.0003125	0	0	0	0	0	0	0.0013624	0	0	0	0	0	0	CSQ=T|intron_variant|MODIFIER|ASB11|ENSG00000165192|Transcript|ENST00000344384.8|protein_coding||1/6||||||||||-1||HGNC|HGNC:17186||5|A1||||||||||||||||||||||||||4.936|0.269316|0.868|,T|intron_variant|MODIFIER|ASB11|ENSG00000165192|Transcript|ENST00000380470.7|protein_coding||1/6||||||||||-1||HGNC|HGNC:17186||1|||||||||||||||||||||||||||4.936|0.269316|0.868|,T|intron_variant|MODIFIER|ASB11|ENSG000…	N	N	4.936	0.868	N	N
X	15311339	.	G	A	G	A	0.0002649	0.513692	0	0	0	0.0019084	0	0	N	N	N	N	N	N	N	N	N	N	N	N	N	CSQ=A|intron_variant|MODIFIER|ASB11|ENSG00000165192|Transcript|ENST00000344384.8|protein_coding||1/6||||||||rs746154724||-1||HGNC|HGNC:17186||5|A1|||0.0003|||||||||||||||||||||||0.352|-0.260915|0.868|,A|intron_variant|MODIFIER|ASB11|ENSG00000165192|Transcript|ENST00000380470.7|protein_coding||1/6||||||||rs746154724||-1||HGNC|HGNC:17186||1||||0.0003|||||||||||||||||||||||0.352|-0.260915|0.868|,A|i…	N	N	0.352	0.868	N	N
X	15311349	.	G	A	G	A	0.00024108	0.486308	N	N	N	N	N	0	0	0	0	0	0	0	0	0	0	0	0	0	0	CSQ=A|intron_variant|MODIFIER|ASB11|ENSG00000165192|Transcript|ENST00000344384.8|protein_coding||1/6||||||||||-1||HGNC|HGNC:17186||5|A1||||||||||||||||||||||||||2.164|0.043080|0.868|,A|intron_variant|MODIFIER|ASB11|ENSG00000165192|Transcript|ENST00000380470.7|protein_coding||1/6||||||||||-1||HGNC|HGNC:17186||1|||||||||||||||||||||||||||2.164|0.043080|0.868|,A|intron_variant|MODIFIER|ASB11|ENSG000…	N	N	2.164	0.868	N	N
X	15311446	rs190165004	C	T	C	T	0.00337512	0.486308	N	N	N	N	N	0.004375	0	0	0	0	0	0	0	0.0298507	0	0	0	0	0	CSQ=T|intron_variant|MODIFIER|ASB11|ENSG00000165192|Transcript|ENST00000344384.8|protein_coding||1/6||||||||rs190165004||-1||HGNC|HGNC:17186||5|A1||||||||||||||||||||||||||2.624|0.085525|0.868|,T|intron_variant|MODIFIER|ASB11|ENSG00000165192|Transcript|ENST00000380470.7|protein_coding||1/6||||||||rs190165004||-1||HGNC|HGNC:17186||1|||||||||||||||||||||||||||2.624|0.085525|0.868|,T|intron_variant|…	N	N	2.624	0.868	N	N
X	15311487	.	G	A	G	A	0.00024108	0.486308	N	N	N	N	N	0	0	0	0	0	0	0	0	0	0	0	0	0	0	CSQ=A|intron_variant|MODIFIER|ASB11|ENSG00000165192|Transcript|ENST00000344384.8|protein_coding||1/6||||||||||-1||HGNC|HGNC:17186||5|A1||||||||||||||||||||||||||8.447|0.630226|0.868|,A|intron_variant|MODIFIER|ASB11|ENSG00000165192|Transcript|ENST00000380470.7|protein_coding||1/6||||||||||-1||HGNC|HGNC:17186||1|||||||||||||||||||||||||||8.447|0.630226|0.868|,A|intron_variant|MODIFIER|ASB11|ENSG000…	N	N	8.447	0.868	N	N
X	15311490	.	A	G	A	G	0.00024108	0.486308	N	N	N	N	N	0.0003125	0	0	0	0	0	0	0	0	0	0	0.0041841	0	0	CSQ=G|intron_variant|MODIFIER|ASB11|ENSG00000165192|Transcript|ENST00000344384.8|protein_coding||1/6||||||||||-1||HGNC|HGNC:17186||5|A1||||||||||||||||||||||||||9.294|0.731675|0.868|,G|intron_variant|MODIFIER|ASB11|ENSG00000165192|Transcript|ENST00000380470.7|protein_coding||1/6||||||||||-1||HGNC|HGNC:17186||1|||||||||||||||||||||||||||9.294|0.731675|0.868|,G|intron_variant|MODIFIER|ASB11|ENSG000…	N	N	9.294	0.868	N	N
X	15311549	rs150507780	G	A	G	A	0.00845639	0	0	0.00652742	0.00199402	0.00763359	0.00278552	0.0123721	0.0373444	0	0.0130719	0.0555556	0	0	0.0476839	0	0	0	0	0.00689655	0	CSQ=A|intron_variant|MODIFIER|ASB11|ENSG00000165192|Transcript|ENST00000344384.8|protein_coding||1/6||||||||rs150507780||-1||HGNC|HGNC:17186||5|A1|||0.0034|0.002|0.0076|0|0.0065|0.0028||||||||||||||||||1.480|-0.031834|0.868|,A|intron_variant|MODIFIER|ASB11|ENSG00000165192|Transcript|ENST00000380470.7|protein_coding||1/6||||||||rs150507780||-1||HGNC|HGNC:17186||1||||0.0034|0.002|0.0076|0|0.0065|0.…	N	N	1.48	0.868	N	N
X	15311643	.	C	T	C	T	0.00024108	0.486308	N	N	N	N	N	0.0003125	0	0	0	0	0	0	0.0013624	0	0	0	0	0	0	CSQ=T|intron_variant|MODIFIER|ASB11|ENSG00000165192|Transcript|ENST00000344384.8|protein_coding||1/6||||||||||-1||HGNC|HGNC:17186||5|A1||||||||||||||||||||||||||1.454|-0.035122|0.868|,T|intron_variant|MODIFIER|ASB11|ENSG00000165192|Transcript|ENST00000380470.7|protein_coding||1/6||||||||||-1||HGNC|HGNC:17186||1|||||||||||||||||||||||||||1.454|-0.035122|0.868|,T|intron_variant|MODIFIER|ASB11|ENSG0…	N	N	1.454	0.868	N	N
X	15311727	.	A	G	A	G	0.0002649	0.513692	0	0	0	0.0019084	0	0	N	N	N	N	N	N	N	N	N	N	N	N	N	CSQ=G|intron_variant|MODIFIER|ASB11|ENSG00000165192|Transcript|ENST00000344384.8|protein_coding||1/6||||||||rs779968694||-1||HGNC|HGNC:17186||5|A1|||0.0003|||||||||||||||||||||||1.485|-0.031250|0.868|,G|intron_variant|MODIFIER|ASB11|ENSG00000165192|Transcript|ENST00000380470.7|protein_coding||1/6||||||||rs779968694||-1||HGNC|HGNC:17186||1||||0.0003|||||||||||||||||||||||1.485|-0.031250|0.868|,G|i…	N	N	1.485	0.868	N	N
X	15311741	rs369164286	G	T	G	T	0.0147059	0.486308	N	N	N	N	N	0.0184375	0	0	0.0392157	0	0	0.0121951	0	0	0	0.0967742	0	0.00689655	0	CSQ=T|intron_variant|MODIFIER|ASB11|ENSG00000165192|Transcript|ENST00000344384.8|protein_coding||1/6||||||||rs369164286||-1||HGNC|HGNC:17186||5|A1||||||||||||||||||||||||||6.226|0.384991|0.868|,T|intron_variant|MODIFIER|ASB11|ENSG00000165192|Transcript|ENST00000380470.7|protein_coding||1/6||||||||rs369164286||-1||HGNC|HGNC:17186||1|||||||||||||||||||||||||||6.226|0.384991|0.868|,T|intron_variant|…	N	N	6.226	0.868	N	N
X	15311755	.	T	C	T	C	0.00024108	0.486308	N	N	N	N	N	0	0	0	0	0	0	0	0	0	0	0	0	0	0	CSQ=C|intron_variant|MODIFIER|ASB11|ENSG00000165192|Transcript|ENST00000344384.8|protein_coding||1/6||||||||rs1235862490||-1||HGNC|HGNC:17186||5|A1||||||||||||||||||||||||||2.965|0.114394|0.868|,C|intron_variant|MODIFIER|ASB11|ENSG00000165192|Transcript|ENST00000380470.7|protein_coding||1/6||||||||rs1235862490||-1||HGNC|HGNC:17186||1|||||||||||||||||||||||||||2.965|0.114394|0.868|,C|intron_varian…	N	N	2.965	0.868	N	N
X	15311773	rs182064731	G	T	G	T	0.0015894	0.513692	0.0078534	0	0	0	0	0	N	N	N	N	N	N	N	N	N	N	N	N	N	CSQ=T|intron_variant|MODIFIER|ASB11|ENSG00000165192|Transcript|ENST00000344384.8|protein_coding||1/6||||||||rs182064731||-1||HGNC|HGNC:17186||5|A1|||0.0016|0|0|0.0079|0|0||||||||||||||||||3.179|0.131598|0.868|,T|intron_variant|MODIFIER|ASB11|ENSG00000165192|Transcript|ENST00000380470.7|protein_coding||1/6||||||||rs182064731||-1||HGNC|HGNC:17186||1||||0.0016|0|0|0.0079|0|0||||||||||||||||||3.179|0…	N	N	3.179	0.868	N	N
X	15311831	rs139489358	T	C	T	C	0.0536413	0	0.0013089	0.00522193	0.0717847	0.00763359	0.00278552	0.0773257	0.0871369	0.0436047	0.117647	0.0555556	0.0330578	0.0365854	0.0817439	0.110874	0.0789474	0.00948767	0.158996	0.172414	0.113208	CSQ=C|intron_variant|MODIFIER|ASB11|ENSG00000165192|Transcript|ENST00000344384.8|protein_coding||1/6||||||||rs139489358||-1||HGNC|HGNC:17186||5|A1|||0.0220|0.0718|0.0076|0.0013|0.0052|0.0028||||||||||||||||||1.925|0.018777|0.868|,C|intron_variant|MODIFIER|ASB11|ENSG00000165192|Transcript|ENST00000380470.7|protein_coding||1/6||||||||rs139489358||-1||HGNC|HGNC:17186||1||||0.0220|0.0718|0.0076|0.001…	N	N	1.925	0.868	N	N
X	15311883	.	T	C	T	C	0.00164079	0	0.0013089	0	0.00697906	0.0019084	0	0.0019034	0	0	0	0	0	0	0	0	0	0	0.0041841	0	0	CSQ=C|intron_variant|MODIFIER|ASB11|ENSG00000165192|Transcript|ENST00000344384.8|protein_coding||1/6||||||||rs774365012||-1||HGNC|HGNC:17186||5|A1|||0.0024|||||||||||||||||||||||2.675|0.089956|0.868|,C|intron_variant|MODIFIER|ASB11|ENSG00000165192|Transcript|ENST00000380470.7|protein_coding||1/6||||||||rs774365012||-1||HGNC|HGNC:17186||1||||0.0024|||||||||||||||||||||||2.675|0.089956|0.868|,C|int…	N	N	2.675	0.868	N	N
X	15311900	.	C	A	C	A	0.00096432	0.486308	N	N	N	N	N	0.0009375	0	0.00872093	0	0	0	0	0	0	0	0	0	0	0	CSQ=A|intron_variant|MODIFIER|ASB11|ENSG00000165192|Transcript|ENST00000344384.8|protein_coding||1/6||||||||||-1||HGNC|HGNC:17186||5|A1||||||||||||||||||||||||||0.319|-0.274032|0.868|,A|intron_variant|MODIFIER|ASB11|ENSG00000165192|Transcript|ENST00000380470.7|protein_coding||1/6||||||||||-1||HGNC|HGNC:17186||1|||||||||||||||||||||||||||0.319|-0.274032|0.868|,A|intron_variant|MODIFIER|ASB11|ENSG0…	N	N	0.319	0.868	N	N
X	15311939	rs372714933	G	A	G	A	0.00819672	0.486308	N	N	N	N	N	0.010625	0	0	0	0	0	0	0	0.0724947	0	0	0	0	0	CSQ=A|intron_variant|MODIFIER|ASB11|ENSG00000165192|Transcript|ENST00000344384.8|protein_coding||1/6||||||||rs372714933||-1||HGNC|HGNC:17186||5|A1||||||||||||||||||||||||||0.835|-0.130822|0.868|,A|intron_variant|MODIFIER|ASB11|ENSG00000165192|Transcript|ENST00000380470.7|protein_coding||1/6||||||||rs372714933||-1||HGNC|HGNC:17186||1|||||||||||||||||||||||||||0.835|-0.130822|0.868|,A|intron_varian…	N	N	0.835	0.868	N	N
X	15311943	.	G	C	G	C	0.00024108	0.486308	N	N	N	N	N	0.0003125	0	0	0	0	0.00826446	0	0	0	0	0	0	0	0	CSQ=C|intron_variant|MODIFIER|ASB11|ENSG00000165192|Transcript|ENST00000344384.8|protein_coding||1/6||||||||||-1||HGNC|HGNC:17186||5|A1||||||||||||||||||||||||||0.075|-0.458720|0.868|,C|intron_variant|MODIFIER|ASB11|ENSG00000165192|Transcript|ENST00000380470.7|protein_coding||1/6||||||||||-1||HGNC|HGNC:17186||1|||||||||||||||||||||||||||0.075|-0.458720|0.868|,C|intron_variant|MODIFIER|ASB11|ENSG0…	N	N	0.075	0.868	N	N
X	15312044	.	T	C	T	C	0.0012054	0.486308	N	N	N	N	N	0.00125	0	0	0	0	0.0330578	0	0	0	0	0	0	0	0	CSQ=C|intron_variant|MODIFIER|ASB11|ENSG00000165192|Transcript|ENST00000344384.8|protein_coding||1/6||||||||rs531483290||-1||HGNC|HGNC:17186||5|A1||||||||||||||||||||||||||2.123|0.038999|0.868|,C|intron_variant|MODIFIER|ASB11|ENSG00000165192|Transcript|ENST00000380470.7|protein_coding||1/6||||||||rs531483290||-1||HGNC|HGNC:17186||1|||||||||||||||||||||||||||2.123|0.038999|0.868|,C|intron_variant|…	N	N	2.123	0.868	N	N
X	15312105	.	A	G	A	G	0.00113593	0	0	0	0.00598205	0	0	0.00142755	0	0	0	0	0	0	0	0	0	0	0	0	0	CSQ=G|intron_variant|MODIFIER|ASB11|ENSG00000165192|Transcript|ENST00000344384.8|protein_coding||1/6||||||||rs549569513||-1||HGNC|HGNC:17186||5|A1|||0.0016|||||||||||||||||||||||3.083|0.123974|0.868|,G|intron_variant|MODIFIER|ASB11|ENSG00000165192|Transcript|ENST00000380470.7|protein_coding||1/6||||||||rs549569513||-1||HGNC|HGNC:17186||1||||0.0016|||||||||||||||||||||||3.083|0.123974|0.868|,G|int…	N	N	3.083	0.868	N	N
X	15312130	.	T	A	T	A	0.00555345	0	0	0	0	0	0.00139276	0.00927909	0.0124481	0	0	0.0185185	0.00826446	0	0.0381471	0	0.0263158	0	0	0	0.0943396	CSQ=A|intron_variant|MODIFIER|ASB11|ENSG00000165192|Transcript|ENST00000344384.8|protein_coding||1/6||||||||rs771659173||-1||HGNC|HGNC:17186||5|A1|||0.0003|||||||||||||||||||||||1.930|0.019371|0.868|,A|intron_variant|MODIFIER|ASB11|ENSG00000165192|Transcript|ENST00000380470.7|protein_coding||1/6||||||||rs771659173||-1||HGNC|HGNC:17186||1||||0.0003|||||||||||||||||||||||1.930|0.019371|0.868|,A|int…	N	N	1.93	0.868	N	N
X	15312233	.	G	A	G	A	0.0002649	0.513692	0	0	0.00099701	0	0	0.00099701	N	N	N	N	N	N	N	N	N	N	N	N	N	CSQ=A|intron_variant|MODIFIER|ASB11|ENSG00000165192|Transcript|ENST00000344384.8|protein_coding||1/6||||||||rs772564808||-1||HGNC|HGNC:17186||5|A1|||0.0003|||||||||||||||||||||||0.424|-0.234801|0.868|,A|intron_variant|MODIFIER|ASB11|ENSG00000165192|Transcript|ENST00000380470.7|protein_coding||1/6||||||||rs772564808||-1||HGNC|HGNC:17186||1||||0.0003|||||||||||||||||||||||0.424|-0.234801|0.868|,A|i…	N	N	0.424	0.868	N	N
X	15312241	rs186657568	A	T	A	T	0.00370861	0.513692	0.0026178	0.00652742	0.00498504	0.0019084	0.00139276	0.00498504	N	N	N	N	N	N	N	N	N	N	N	N	N	CSQ=T|intron_variant|MODIFIER|ASB11|ENSG00000165192|Transcript|ENST00000344384.8|protein_coding||1/6||||||||rs186657568&COSV60355540||-1||HGNC|HGNC:17186||5|A1|||0.0037|0.005|0.0019|0.0026|0.0065|0.0014|||||||||||0&1|0&1||||||0.956|-0.108370|0.868|,T|intron_variant|MODIFIER|ASB11|ENSG00000165192|Transcript|ENST00000380470.7|protein_coding||1/6||||||||rs186657568&COSV60355540||-1||HGNC|HGNC:17186|…	N	N	0.956	0.868	N	N
X	15312292	.	A	G	A	G	0.0002649	0.513692	0	0	0.00099701	0	0	0.00099701	N	N	N	N	N	N	N	N	N	N	N	N	N	CSQ=G|intron_variant|MODIFIER|ASB11|ENSG00000165192|Transcript|ENST00000344384.8|protein_coding||1/6||||||||rs765932453||-1||HGNC|HGNC:17186||5|A1|||0.0003|||||||||||||||||||||||0.067|-0.472257|0.868|,G|intron_variant|MODIFIER|ASB11|ENSG00000165192|Transcript|ENST00000380470.7|protein_coding||1/6||||||||rs765932453||-1||HGNC|HGNC:17186||1||||0.0003|||||||||||||||||||||||0.067|-0.472257|0.868|,G|i…	N	N	0.067	0.868	N	N
X	15312406	.	C	T	C	T	0.00096432	0.486308	N	N	N	N	N	0.00125	0	0.00872093	0	0	0	0	0.0013624	0	0	0	0	0	0	CSQ=T|intron_variant|MODIFIER|ASB11|ENSG00000165192|Transcript|ENST00000344384.8|protein_coding||1/6||||||||rs928209887||-1||HGNC|HGNC:17186||5|A1||||||||||||||||||||||||||0.006|-0.768094|0.868|,T|intron_variant|MODIFIER|ASB11|ENSG00000165192|Transcript|ENST00000380470.7|protein_coding||1/6||||||||rs928209887||-1||HGNC|HGNC:17186||1|||||||||||||||||||||||||||0.006|-0.768094|0.868|,T|intron_varian…	N	N	0.006	0.868	N	N
X	15312430	.	A	C	A	C	0.00024108	0.486308	N	N	N	N	N	0.0003125	0	0.00290698	0	0	0	0	0	0	0	0	0	0	0	CSQ=C|intron_variant|MODIFIER|ASB11|ENSG00000165192|Transcript|ENST00000344384.8|protein_coding||1/6||||||||rs888728661||-1||HGNC|HGNC:17186||5|A1||||||||||||||||||||||||||0.091|-0.433648|0.868|,C|intron_variant|MODIFIER|ASB11|ENSG00000165192|Transcript|ENST00000380470.7|protein_coding||1/6||||||||rs888728661||-1||HGNC|HGNC:17186||1|||||||||||||||||||||||||||0.091|-0.433648|0.868|,C|intron_varian…	N	N	0.091	0.868	N	N
X	15312449	.	A	G	A	G	0.00024108	0.486308	N	N	N	N	N	0.0003125	0	0	0	0	0	0	0	0	0	0	0.0041841	0	0	CSQ=G|intron_variant|MODIFIER|ASB11|ENSG00000165192|Transcript|ENST00000344384.8|protein_coding||1/6||||||||||-1||HGNC|HGNC:17186||5|A1||||||||||||||||||||||||||5.566|0.323439|0.868|,G|intron_variant|MODIFIER|ASB11|ENSG00000165192|Transcript|ENST00000380470.7|protein_coding||1/6||||||||||-1||HGNC|HGNC:17186||1|||||||||||||||||||||||||||5.566|0.323439|0.868|,G|intron_variant|MODIFIER|ASB11|ENSG000…	N	N	5.566	0.868	N	N
X	15312462	.	C	A	C	A	0.00821192	0.513692	0.0013089	0.0117494	0.00897308	0.00572519	0.0125348	0.00897308	N	N	N	N	N	N	N	N	N	N	N	N	N	CSQ=A|intron_variant|MODIFIER|ASB11|ENSG00000165192|Transcript|ENST00000344384.8|protein_coding||1/6||||||||rs753117272||-1||HGNC|HGNC:17186||5|A1|||0.0082|||||||||||||||||||||||0.095|-0.429354|0.868|,A|intron_variant|MODIFIER|ASB11|ENSG00000165192|Transcript|ENST00000380470.7|protein_coding||1/6||||||||rs753117272||-1||HGNC|HGNC:17186||1||||0.0082|||||||||||||||||||||||0.095|-0.429354|0.868|,A|i…	N	N	0.095	0.868	N	N
X	15312466	.	G	A	G	A	0.0108609	0.513692	0.0026178	0.0078329	0.0159521	0.00763359	0.0181058	0.0159521	N	N	N	N	N	N	N	N	N	N	N	N	N	CSQ=A|intron_variant|MODIFIER|ASB11|ENSG00000165192|Transcript|ENST00000344384.8|protein_coding||1/6||||||||rs763157339||-1||HGNC|HGNC:17186||5|A1|||0.0109|||||||||||||||||||||||0.529|-0.202435|0.868|,A|intron_variant|MODIFIER|ASB11|ENSG00000165192|Transcript|ENST00000380470.7|protein_coding||1/6||||||||rs763157339||-1||HGNC|HGNC:17186||1||||0.0109|||||||||||||||||||||||0.529|-0.202435|0.868|,A|i…	N	N	0.529	0.868	N	N
X	15312484	.	C	A	C	A	0.0002649	0.513692	0	0	0	0	0.00139276	0	N	N	N	N	N	N	N	N	N	N	N	N	N	CSQ=A|intron_variant|MODIFIER|ASB11|ENSG00000165192|Transcript|ENST00000344384.8|protein_coding||1/6||||||||rs764613447||-1||HGNC|HGNC:17186||5|A1|||0.0003|||||||||||||||||||||||0.092|-0.432508|0.868|,A|intron_variant|MODIFIER|ASB11|ENSG00000165192|Transcript|ENST00000380470.7|protein_coding||1/6||||||||rs764613447||-1||HGNC|HGNC:17186||1||||0.0003|||||||||||||||||||||||0.092|-0.432508|0.868|,A|i…	N	N	0.092	0.868	N	N
X	15312488	.	T	G	T	G	0.0013245	0.513692	0	0.00261097	0	0	0.00417827	0	N	N	N	N	N	N	N	N	N	N	N	N	N	CSQ=G|intron_variant|MODIFIER|ASB11|ENSG00000165192|Transcript|ENST00000344384.8|protein_coding||1/6||||||||rs752010906||-1||HGNC|HGNC:17186||5|A1|||0.0013|||||||||||||||||||||||1.054|-0.091890|0.868|,G|intron_variant|MODIFIER|ASB11|ENSG00000165192|Transcript|ENST00000380470.7|protein_coding||1/6||||||||rs752010906||-1||HGNC|HGNC:17186||1||||0.0013|||||||||||||||||||||||1.054|-0.091890|0.868|,G|i…	N	N	1.054	0.868	N	N
X	15312507	rs66828848	CA	C	C	C	0.496954	0.513692	0.441099	0.407311	0.530409	0.381679	0.689415	0.530409	N	N	N	N	N	N	N	N	N	N	N	N	N	CSQ=-|intron_variant|MODIFIER|ASB11|ENSG00000165192|Transcript|ENST00000344384.8|protein_coding||1/6||||||||rs66828848||-1||HGNC|HGNC:17186||5|A1||||0.5304|0.3817|0.4411|0.4073|0.6894||||||||||||||||||0.407|-0.240673|0.868|,-|intron_variant|MODIFIER|ASB11|ENSG00000165192|Transcript|ENST00000380470.7|protein_coding||1/6||||||||rs66828848||-1||HGNC|HGNC:17186||1|||||0.5304|0.3817|0.4411|0.4073|0.68…	N	N	0.407	0.868	N	N
X	15312516	.	A	G	-	G	0.0002649	0.513692	0.0013089	0	0	0	0	0	N	N	N	N	N	N	N	N	N	N	N	N	N	CSQ=G|intron_variant|MODIFIER|ASB11|ENSG00000165192|Transcript|ENST00000344384.8|protein_coding||1/6||||||||rs781293837||-1||HGNC|HGNC:17186||5|A1|||0.0003|||||||||||||||||||||||1.769|0.001946|0.868|,G|intron_variant|MODIFIER|ASB11|ENSG00000165192|Transcript|ENST00000380470.7|protein_coding||1/6||||||||rs781293837||-1||HGNC|HGNC:17186||1||||0.0003|||||||||||||||||||||||1.769|0.001946|0.868|,G|int…	N	N	1.769	0.868	N	N
X	15312613	.	T	C	T	C	0.0002649	0.513692	0	0	0	0	0.00139276	0	N	N	N	N	N	N	N	N	N	N	N	N	N	CSQ=C|intron_variant|MODIFIER|ASB11|ENSG00000165192|Transcript|ENST00000344384.8|protein_coding||1/6||||||||rs750467657||-1||HGNC|HGNC:17186||5|A1|||0.0003|||||||||||||||||||||||1.948|0.021250|0.868|,C|intron_variant|MODIFIER|ASB11|ENSG00000165192|Transcript|ENST00000380470.7|protein_coding||1/6||||||||rs750467657||-1||HGNC|HGNC:17186||1||||0.0003|||||||||||||||||||||||1.948|0.021250|0.868|,C|int…	N	N	1.948	0.868	N	N
X	15312670	.	G	A	G	A	0.0012054	0.486308	N	N	N	N	N	0.00125	0	0	0	0	0.0330578	0	0	0	0	0	0	0	0	CSQ=A|intron_variant|MODIFIER|ASB11|ENSG00000165192|Transcript|ENST00000344384.8|protein_coding||1/6||||||||rs568248084||-1||HGNC|HGNC:17186||5|A1||||||||||||||||||||||||||0.453|-0.225313|0.868|,A|intron_variant|MODIFIER|ASB11|ENSG00000165192|Transcript|ENST00000380470.7|protein_coding||1/6||||||||rs568248084||-1||HGNC|HGNC:17186||1|||||||||||||||||||||||||||0.453|-0.225313|0.868|,A|intron_varian…	N	N	0.453	0.868	N	N
X	15312728	.	T	C	T	C	0.00238411	0.513692	0	0	0	0	0.0125348	0	N	N	N	N	N	N	N	N	N	N	N	N	N	CSQ=C|intron_variant|MODIFIER|ASB11|ENSG00000165192|Transcript|ENST00000344384.8|protein_coding||1/6||||||||rs756420405||-1||HGNC|HGNC:17186||5|A1|||0.0024|||||||||||||||||||||||4.859|0.262965|0.868|,C|intron_variant|MODIFIER|ASB11|ENSG00000165192|Transcript|ENST00000380470.7|protein_coding||1/6||||||||rs756420405||-1||HGNC|HGNC:17186||1||||0.0024|||||||||||||||||||||||4.859|0.262965|0.868|,C|int…	N	N	4.859	0.868	N	N
X	15312733	.	C	T	C	T	0.00048216	0.486308	N	N	N	N	N	0.000625	0	0	0	0	0	0	0	0	0	0	0.0083682	0	0	CSQ=T|intron_variant|MODIFIER|ASB11|ENSG00000165192|Transcript|ENST00000344384.8|protein_coding||1/6||||||||rs1042828406||-1||HGNC|HGNC:17186||5|A1||||||||||||||||||||||||||3.136|0.128232|0.868|,T|intron_variant|MODIFIER|ASB11|ENSG00000165192|Transcript|ENST00000380470.7|protein_coding||1/6||||||||rs1042828406||-1||HGNC|HGNC:17186||1|||||||||||||||||||||||||||3.136|0.128232|0.868|,T|intron_varian…	N	N	3.136	0.868	N	N
X	15312797	rs149687408	T	A	T	A	0.0202507	0.486308	N	N	N	N	N	0.023125	0.033195	0.00581395	0	0.037037	0	0	0.027248	0.0810234	0.0263158	0	0	0	0.0566038	CSQ=A|intron_variant|MODIFIER|ASB11|ENSG00000165192|Transcript|ENST00000344384.8|protein_coding||1/6||||||||rs149687408||-1||HGNC|HGNC:17186||5|A1||||||||||||||||||||||||||6.090|0.371836|0.868|,A|intron_variant|MODIFIER|ASB11|ENSG00000165192|Transcript|ENST00000380470.7|protein_coding||1/6||||||||rs149687408||-1||HGNC|HGNC:17186||1|||||||||||||||||||||||||||6.090|0.371836|0.868|,A|intron_variant|…	N	N	6.09	0.868	N	N
X	15312835	.	A	G	G	G	0.0637973	0.00679744	0	0.00522193	0.0997009	0.00954198	0.00278552	0.0904294	0.0912863	0.063253	0.119205	0.0740741	0.0330578	0.0375	0.0967303	0.12035	0.0789474	0.00948767	0.165957	0.174825	0.132075	CSQ=G|intron_variant|MODIFIER|ASB11|ENSG00000165192|Transcript|ENST00000344384.8|protein_coding||1/6||||||||rs780084318||-1||HGNC|HGNC:17186||5|A1|||0.0294|||||||||||||||||||||||0.904|-0.117668|0.868|,G|intron_variant|MODIFIER|ASB11|ENSG00000165192|Transcript|ENST00000380470.7|protein_coding||1/6||||||||rs780084318||-1||HGNC|HGNC:17186||1||||0.0294|||||||||||||||||||||||0.904|-0.117668|0.868|,G|i…	N	N	0.904	0.868	N	N
X	15312837	rs58595330	C	CTAACTT	C	C	0.370819	0	0.566754	0.52611	0.323031	0.629771	0.229805	0.311206	0.381743	0.31686	0.261438	0.444444	0.0826446	0.207317	0.455041	0.0938166	0.315789	0.343454	0.284519	0.262069	0.283019	CSQ=TAACTT|intron_variant|MODIFIER|ASB11|ENSG00000165192|Transcript|ENST00000344384.8|protein_coding||1/6||||||||rs58595330||-1||HGNC|HGNC:17186||5|A1||||0.677|0.3702|0.4332|0.4739|0.7702||||||||||||||||||3.456|0.153335|0.868|,TAACTT|intron_variant|MODIFIER|ASB11|ENSG00000165192|Transcript|ENST00000380470.7|protein_coding||1/6||||||||rs58595330||-1||HGNC|HGNC:17186||1|||||0.677|0.3702|0.4332|0.47…	N	N	3.456	0.868	N	N
X	15312852	.	T	C	T	C	0.00048216	0.486308	N	N	N	N	N	0.000625	0	0	0.0130719	0	0	0	0	0	0	0	0	0	0	CSQ=C|intron_variant|MODIFIER|ASB11|ENSG00000165192|Transcript|ENST00000344384.8|protein_coding||1/6||||||||||-1||HGNC|HGNC:17186||5|A1||||||||||||||||||||||||||3.660|0.169101|0.868|,C|intron_variant|MODIFIER|ASB11|ENSG00000165192|Transcript|ENST00000380470.7|protein_coding||1/6||||||||||-1||HGNC|HGNC:17186||1|||||||||||||||||||||||||||3.660|0.169101|0.868|,C|intron_variant|MODIFIER|ASB11|ENSG000…	N	N	3.66	0.868	N	N
X	15312864	.	G	A	G	A	0.0002649	0.513692	0.0013089	0	0	0	0	0	N	N	N	N	N	N	N	N	N	N	N	N	N	CSQ=A|intron_variant|MODIFIER|ASB11|ENSG00000165192|Transcript|ENST00000344384.8|protein_coding||1/6||||||||rs768533080||-1||HGNC|HGNC:17186||5|A1|||0.0003|||||||||||||||||||||||4.285|0.217244|0.868|,A|intron_variant|MODIFIER|ASB11|ENSG00000165192|Transcript|ENST00000380470.7|protein_coding||1/6||||||||rs768533080||-1||HGNC|HGNC:17186||1||||0.0003|||||||||||||||||||||||4.285|0.217244|0.868|,A|int…	N	N	4.285	0.868	N	N
X	15312871	rs189200812	G	A	G	A	0.0002649	0.513692	0.0013089	0	0	0	0	0	N	N	N	N	N	N	N	N	N	N	N	N	N	CSQ=A|intron_variant|MODIFIER|ASB11|ENSG00000165192|Transcript|ENST00000344384.8|protein_coding||1/6||||||||rs189200812||-1||HGNC|HGNC:17186||5|A1|||0.0003|0|0|0.0013|0|0||||||||||||||||||5.352|0.304592|0.868|,A|intron_variant|MODIFIER|ASB11|ENSG00000165192|Transcript|ENST00000380470.7|protein_coding||1/6||||||||rs189200812||-1||HGNC|HGNC:17186||1||||0.0003|0|0|0.0013|0|0||||||||||||||||||5.352|0…	N	N	5.352	0.868	N	N
X	15312902	rs192865497	T	G	T	G	0.0010596	0.513692	0	0.00522193	0	0	0	0	N	N	N	N	N	N	N	N	N	N	N	N	N	CSQ=G|intron_variant|MODIFIER|ASB11|ENSG00000165192|Transcript|ENST00000344384.8|protein_coding||1/6||||||||rs192865497||-1||HGNC|HGNC:17186||5|A1|||0.0011|0|0|0|0.0052|0||||||||||||||||||3.288|0.140267|0.868|,G|intron_variant|MODIFIER|ASB11|ENSG00000165192|Transcript|ENST00000380470.7|protein_coding||1/6||||||||rs192865497||-1||HGNC|HGNC:17186||1||||0.0011|0|0|0|0.0052|0||||||||||||||||||3.288|0…	N	N	3.288	0.868	N	N
X	15312918	.	T	C	T	C	0.00048216	0.486308	N	N	N	N	N	0	0	0	0	0	0	0	0	0	0	0	0	0	0	CSQ=C|intron_variant|MODIFIER|ASB11|ENSG00000165192|Transcript|ENST00000344384.8|protein_coding||1/6||||||||||-1||HGNC|HGNC:17186||5|A1||||||||||||||||||||||||||3.013|0.118292|0.868|,C|intron_variant|MODIFIER|ASB11|ENSG00000165192|Transcript|ENST00000380470.7|protein_coding||1/6||||||||||-1||HGNC|HGNC:17186||1|||||||||||||||||||||||||||3.013|0.118292|0.868|,C|intron_variant|MODIFIER|ASB11|ENSG000…	N	N	3.013	0.868	N	N
X	15312958	rs147807558	A	C	A	C	0.0632336	0	0	0.00522193	0.111665	0.00954198	0.00278552	0.0896978	0.0912863	0.0668605	0.117647	0.0740741	0.0330578	0.0487805	0.0762943	0.117271	0.0789474	0.00948767	0.167364	0.172414	0.113208	CSQ=C|intron_variant|MODIFIER|ASB11|ENSG00000165192|Transcript|ENST00000344384.8|protein_coding||1/6||||||||rs147807558||-1||HGNC|HGNC:17186||5|A1|||0.0326|0.1117|0.0095|0|0.0052|0.0028||||||||||||||||||3.135|0.128107|0.868|,C|intron_variant|MODIFIER|ASB11|ENSG00000165192|Transcript|ENST00000380470.7|protein_coding||1/6||||||||rs147807558||-1||HGNC|HGNC:17186||1||||0.0326|0.1117|0.0095|0|0.0052|0…	N	N	3.135	0.868	N	N
X	15312987	.	C	CG	C	CG	0.00024108	0.486308	N	N	N	N	N	0.0003125	0	0	0	0	0	0	0	0	0	0	0	0.00689655	0	CSQ=G|intron_variant|MODIFIER|ASB11|ENSG00000165192|Transcript|ENST00000344384.8|protein_coding||1/6||||||||||-1||HGNC|HGNC:17186||5|A1||||||||||||||||||||||||||||0.868|,G|intron_variant|MODIFIER|ASB11|ENSG00000165192|Transcript|ENST00000380470.7|protein_coding||1/6||||||||||-1||HGNC|HGNC:17186||1|||||||||||||||||||||||||||||0.868|,G|intron_variant|MODIFIER|ASB11|ENSG00000165192|Transcript|ENST00…	N	N	N	0.868	N	N
X	15312992	.	G	A	G	A	0.00024108	0.486308	N	N	N	N	N	0.0003125	0	0	0	0	0	0	0.0013624	0	0	0	0	0	0	CSQ=A|intron_variant|MODIFIER|ASB11|ENSG00000165192|Transcript|ENST00000344384.8|protein_coding||1/6||||||||||-1||HGNC|HGNC:17186||5|A1||||||||||||||||||||||||||0.913|-0.116164|0.868|,A|intron_variant|MODIFIER|ASB11|ENSG00000165192|Transcript|ENST00000380470.7|protein_coding||1/6||||||||||-1||HGNC|HGNC:17186||1|||||||||||||||||||||||||||0.913|-0.116164|0.868|,A|intron_variant|MODIFIER|ASB11|ENSG0…	N	N	0.913	0.868	N	N
X	15313040	rs201248205	G	GA	G	GA	0.0631074	0	0	0.00522193	0.111665	0.00954198	0.00278552	0.0896978	0.0912863	0.0668605	0.117647	0.0740741	0.0330578	0.0487805	0.0762943	0.117271	0.0789474	0.00948767	0.167364	0.172414	0.113208	CSQ=A|intron_variant|MODIFIER|ASB11|ENSG00000165192|Transcript|ENST00000344384.8|protein_coding||1/6||||||||rs201248205||-1||HGNC|HGNC:17186||5|A1||||0.1117|0.0095|0|0.0052|0.0028||||||||||||||||||1.414|-0.040138|0.868|,A|intron_variant|MODIFIER|ASB11|ENSG00000165192|Transcript|ENST00000380470.7|protein_coding||1/6||||||||rs201248205||-1||HGNC|HGNC:17186||1|||||0.1117|0.0095|0|0.0052|0.0028||||||…	N	N	1.414	0.868	N	N
X	15313077	rs376007321	C	T	C	T	0.00024108	0.486308	N	N	N	N	N	0.0003125	0	0	0	0	0	0	0	0	0	0	0.0041841	0	0	CSQ=T|intron_variant|MODIFIER|ASB11|ENSG00000165192|Transcript|ENST00000344384.8|protein_coding||1/6||||||||rs376007321||-1||HGNC|HGNC:17186||5|A1||||||||||||||||||||||||||2.019|0.028513|0.868|,T|intron_variant|MODIFIER|ASB11|ENSG00000165192|Transcript|ENST00000380470.7|protein_coding||1/6||||||||rs376007321||-1||HGNC|HGNC:17186||1|||||||||||||||||||||||||||2.019|0.028513|0.868|,T|intron_variant|…	N	N	2.019	0.868	N	N
X	15313089	.	T	G	T	G	0.00554484	0.486308	N	N	N	N	N	0.006875	0	0	0	0	0	0	0	0.0469083	0	0	0	0	0	CSQ=G|intron_variant|MODIFIER|ASB11|ENSG00000165192|Transcript|ENST00000344384.8|protein_coding||1/6||||||||||-1||HGNC|HGNC:17186||5|A1||||||||||||||||||||||||||4.987|0.273535|0.868|,G|intron_variant|MODIFIER|ASB11|ENSG00000165192|Transcript|ENST00000380470.7|protein_coding||1/6||||||||||-1||HGNC|HGNC:17186||1|||||||||||||||||||||||||||4.987|0.273535|0.868|,G|intron_variant|MODIFIER|ASB11|ENSG000…	N	N	4.987	0.868	N	N
X	15313117	rs185384174	G	A	G	A	0.00211921	0.513692	0	0	0.00199402	0	0.00835655	0.00199402	N	N	N	N	N	N	N	N	N	N	N	N	N	CSQ=A|intron_variant|MODIFIER|ASB11|ENSG00000165192|Transcript|ENST00000344384.8|protein_coding||1/6||||||||rs185384174||-1||HGNC|HGNC:17186||5|A1|||0.0021|0.002|0|0|0|0.0084||||||||||||||||||0.875|-0.123181|0.868|,A|intron_variant|MODIFIER|ASB11|ENSG00000165192|Transcript|ENST00000380470.7|protein_coding||1/6||||||||rs185384174||-1||HGNC|HGNC:17186||1||||0.0021|0.002|0|0|0|0.0084||||||||||||||||…	N	N	0.875	0.868	N	N
X	15313124	rs141295583	C	A	C	A	0.0008835	0	0	0	0.00299103	0	0	0.00118963	0	0	0	0	0	0	0	0	0	0	0	0.0137931	0	CSQ=A|intron_variant|MODIFIER|ASB11|ENSG00000165192|Transcript|ENST00000344384.8|protein_coding||1/6||||||||rs141295583||-1||HGNC|HGNC:17186||5|A1|||0.0008|0.003|0|0|0|0||||||||||||||||||0.772|-0.143640|0.868|,A|intron_variant|MODIFIER|ASB11|ENSG00000165192|Transcript|ENST00000380470.7|protein_coding||1/6||||||||rs141295583||-1||HGNC|HGNC:17186||1||||0.0008|0.003|0|0|0|0||||||||||||||||||0.772|-0…	N	N	0.772	0.868	N	N
X	15313163	rs145254572	C	G	G	G	0.0627288	0	0	0.00522193	0.111665	0.00954198	0.00278552	0.0889841	0.0912863	0.0668605	0.117647	0.0740741	0.0330578	0.0487805	0.0762943	0.110874	0.0789474	0.00948767	0.167364	0.172414	0.113208	CSQ=G|intron_variant|MODIFIER|ASB11|ENSG00000165192|Transcript|ENST00000344384.8|protein_coding||1/6||||||||rs145254572||-1||HGNC|HGNC:17186||5|A1|||0.0326|0.1117|0.0095|0|0.0052|0.0028||||||||||||||||||0.544|-0.198464|0.868|,G|intron_variant|MODIFIER|ASB11|ENSG00000165192|Transcript|ENST00000380470.7|protein_coding||1/6||||||||rs145254572||-1||HGNC|HGNC:17186||1||||0.0326|0.1117|0.0095|0|0.0052|…	N	N	0.544	0.868	N	N
X	15313244	.	C	A	C	A	0.0002649	0.513692	0	0.00130548	0	0	0	0	N	N	N	N	N	N	N	N	N	N	N	N	N	CSQ=A|intron_variant|MODIFIER|ASB11|ENSG00000165192|Transcript|ENST00000344384.8|protein_coding||1/6||||||||rs763326282||-1||HGNC|HGNC:17186||5|A1|||0.0003|||||||||||||||||||||||2.845|0.104452|0.868|,A|intron_variant|MODIFIER|ASB11|ENSG00000165192|Transcript|ENST00000380470.7|protein_coding||1/6||||||||rs763326282||-1||HGNC|HGNC:17186||1||||0.0003|||||||||||||||||||||||2.845|0.104452|0.868|,A|int…	N	N	2.845	0.868	N	N
X	15313256	.	G	A	G	A	0.00048216	0.486308	N	N	N	N	N	0.000625	0	0	0	0	0	0	0	0	0	0	0	0.0137931	0	CSQ=A|intron_variant|MODIFIER|ASB11|ENSG00000165192|Transcript|ENST00000344384.8|protein_coding||1/6||||||||rs1035049337||-1||HGNC|HGNC:17186||5|A1||||||||||||||||||||||||||0.615|-0.179579|0.868|,A|intron_variant|MODIFIER|ASB11|ENSG00000165192|Transcript|ENST00000380470.7|protein_coding||1/6||||||||rs1035049337||-1||HGNC|HGNC:17186||1|||||||||||||||||||||||||||0.615|-0.179579|0.868|,A|intron_vari…	N	N	0.615	0.868	N	N
X	15313271	.	C	T	C	T	0.0012054	0.486308	N	N	N	N	N	0.0015625	0	0	0	0	0	0	0	0	0	0.00948767	0	0	0	CSQ=T|intron_variant|MODIFIER|ASB11|ENSG00000165192|Transcript|ENST00000344384.8|protein_coding||1/6||||||||rs1298211899||-1||HGNC|HGNC:17186||5|A1||||||||||||||||||||||||||0.572|-0.190643|0.868|,T|intron_variant|MODIFIER|ASB11|ENSG00000165192|Transcript|ENST00000380470.7|protein_coding||1/6||||||||rs1298211899||-1||HGNC|HGNC:17186||1|||||||||||||||||||||||||||0.572|-0.190643|0.868|,T|intron_vari…	N	N	0.572	0.868	N	N
X	15313292	.	A	G	A	G	0.00433944	0.486308	N	N	N	N	N	0.0053125	0	0	0	0	0	0	0.020436	0	0	0	0	0.0137931	0	CSQ=G|intron_variant|MODIFIER|ASB11|ENSG00000165192|Transcript|ENST00000344384.8|protein_coding||1/6||||||||||-1||HGNC|HGNC:17186||5|A1||||||||||||||||||||||||||3.571|0.162210|0.868|,G|intron_variant|MODIFIER|ASB11|ENSG00000165192|Transcript|ENST00000380470.7|protein_coding||1/6||||||||||-1||HGNC|HGNC:17186||1|||||||||||||||||||||||||||3.571|0.162210|0.868|,G|intron_variant|MODIFIER|ASB11|ENSG000…	N	N	3.571	0.868	N	N
X	15313302	.	G	T	G	T	0.0005298	0.513692	0	0	0	0	0.00278552	0	N	N	N	N	N	N	N	N	N	N	N	N	N	CSQ=T|intron_variant|MODIFIER|ASB11|ENSG00000165192|Transcript|ENST00000344384.8|protein_coding||1/6||||||||rs764486854||-1||HGNC|HGNC:17186||5|A1|||0.0005|||||||||||||||||||||||1.736|-0.001672|0.868|,T|intron_variant|MODIFIER|ASB11|ENSG00000165192|Transcript|ENST00000380470.7|protein_coding||1/6||||||||rs764486854||-1||HGNC|HGNC:17186||1||||0.0005|||||||||||||||||||||||1.736|-0.001672|0.868|,T|i…	N	N	1.736	0.868	N	N
X	15313307	.	G	A	G	A	0.00096432	0.486308	N	N	N	N	N	0.00125	0	0	0	0	0	0	0.00544959	0	0	0	0	0	0	CSQ=A|intron_variant|MODIFIER|ASB11|ENSG00000165192|Transcript|ENST00000344384.8|protein_coding||1/6||||||||||-1||HGNC|HGNC:17186||5|A1||||||||||||||||||||||||||0.652|-0.170609|0.868|,A|intron_variant|MODIFIER|ASB11|ENSG00000165192|Transcript|ENST00000380470.7|protein_coding||1/6||||||||||-1||HGNC|HGNC:17186||1|||||||||||||||||||||||||||0.652|-0.170609|0.868|,A|intron_variant|MODIFIER|ASB11|ENSG0…	N	N	0.652	0.868	N	N
X	15313315	rs189434634	C	T	T	T	0.00366023	0	0	0	0.0109671	0	0	0.00499643	0.00829876	0.00872093	0	0	0	0	0	0	0.0263158	0	0	0.0275862	0	CSQ=T|intron_variant|MODIFIER|ASB11|ENSG00000165192|Transcript|ENST00000344384.8|protein_coding||1/6||||||||rs189434634||-1||HGNC|HGNC:17186||5|A1|||0.0029|0.011|0|0|0|0||||||||||||||||||0.547|-0.197579|0.868|,T|intron_variant|MODIFIER|ASB11|ENSG00000165192|Transcript|ENST00000380470.7|protein_coding||1/6||||||||rs189434634||-1||HGNC|HGNC:17186||1||||0.0029|0.011|0|0|0|0||||||||||||||||||0.547|-0…	N	N	0.547	0.868	N	N
X	15313323	rs147628516	C	G	C	G	0.0220876	0	0	0	0.0468594	0.00954198	0	0.0302165	0.0165975	0.0552326	0.00653595	0	0.0165289	0.0365854	0.0122616	0.021322	0.0789474	0.00759013	0.0711297	0.0137931	0.113208	CSQ=G|intron_variant|MODIFIER|ASB11|ENSG00000165192|Transcript|ENST00000344384.8|protein_coding||1/6||||||||rs147628516||-1||HGNC|HGNC:17186||5|A1|||0.0138|0.0469|0.0095|0|0|0||||||||||||||||||2.072|0.033893|0.868|,G|intron_variant|MODIFIER|ASB11|ENSG00000165192|Transcript|ENST00000380470.7|protein_coding||1/6||||||||rs147628516||-1||HGNC|HGNC:17186||1||||0.0138|0.0469|0.0095|0|0|0|||||||||||||||…	N	N	2.072	0.868	N	N
X	15313354	rs191817813	G	A	G	A	0.0002649	0.513692	0.0013089	0	0	0	0	0	N	N	N	N	N	N	N	N	N	N	N	N	N	CSQ=A|intron_variant|MODIFIER|ASB11|ENSG00000165192|Transcript|ENST00000344384.8|protein_coding||1/6||||||||rs191817813||-1||HGNC|HGNC:17186||5|A1|||0.0003|0|0|0.0013|0|0||||||||||||||||||0.075|-0.457816|0.868|,A|intron_variant|MODIFIER|ASB11|ENSG00000165192|Transcript|ENST00000380470.7|protein_coding||1/6||||||||rs191817813||-1||HGNC|HGNC:17186||1||||0.0003|0|0|0.0013|0|0||||||||||||||||||0.075|…	N	N	0.075	0.868	N	N
X	15313363	.	A	G	A	G	0.00024108	0.486308	N	N	N	N	N	0	0	0	0	0	0	0	0	0	0	0	0	0	0	CSQ=G|intron_variant|MODIFIER|ASB11|ENSG00000165192|Transcript|ENST00000344384.8|protein_coding||1/6||||||||||-1||HGNC|HGNC:17186||5|A1||||||||||||||||||||||||||1.019|-0.097521|0.868|,G|intron_variant|MODIFIER|ASB11|ENSG00000165192|Transcript|ENST00000380470.7|protein_coding||1/6||||||||||-1||HGNC|HGNC:17186||1|||||||||||||||||||||||||||1.019|-0.097521|0.868|,G|intron_variant|MODIFIER|ASB11|ENSG0…	N	N	1.019	0.868	N	N
X	15313480	rs183614805	C	A	C	A	0.0177963	0	0	0	0.0358923	0.00572519	0	0.0280752	0.0290456	0.0668605	0.0130719	0.0185185	0	0.0853658	0	0.0341151	0	0.0341556	0.0083682	0.0413793	0	CSQ=A|intron_variant|MODIFIER|ASB11|ENSG00000165192|Transcript|ENST00000344384.8|protein_coding||1/6||||||||rs183614805||-1||HGNC|HGNC:17186||5|A1|||0.0103|0.0359|0.0057|0|0|0||||||||||||||||||0.233|-0.315487|0.868|,A|intron_variant|MODIFIER|ASB11|ENSG00000165192|Transcript|ENST00000380470.7|protein_coding||1/6||||||||rs183614805||-1||HGNC|HGNC:17186||1||||0.0103|0.0359|0.0057|0|0|0||||||||||||||…	N	N	0.233	0.868	N	N
X	15313529	rs188280468	A	G	A	G	0.0002649	0.513692	0	0	0.00099701	0	0	0.00099701	N	N	N	N	N	N	N	N	N	N	N	N	N	CSQ=G|intron_variant|MODIFIER|ASB11|ENSG00000165192|Transcript|ENST00000344384.8|protein_coding||1/6||||||||rs188280468||-1||HGNC|HGNC:17186||5|A1|||0.0003|0.001|0|0|0|0||||||||||||||||||3.418|0.150412|0.868|,G|intron_variant|MODIFIER|ASB11|ENSG00000165192|Transcript|ENST00000380470.7|protein_coding||1/6||||||||rs188280468||-1||HGNC|HGNC:17186||1||||0.0003|0.001|0|0|0|0||||||||||||||||||3.418|0.1…	N	N	3.418	0.868	N	N
X	15313574	.	G	A	G	A	0.0002649	0.513692	0	0	0	0	0.00139276	0	N	N	N	N	N	N	N	N	N	N	N	N	N	CSQ=A|intron_variant|MODIFIER|ASB11|ENSG00000165192|Transcript|ENST00000344384.8|protein_coding||1/6||||||||rs755229034||-1||HGNC|HGNC:17186||5|A1|||0.0003|||||||||||||||||||||||2.733|0.094996|0.868|,A|intron_variant|MODIFIER|ASB11|ENSG00000165192|Transcript|ENST00000380470.7|protein_coding||1/6||||||||rs755229034||-1||HGNC|HGNC:17186||1||||0.0003|||||||||||||||||||||||2.733|0.094996|0.868|,A|int…	N	N	2.733	0.868	N	N
X	15313595	.	T	C	T	C	0.0002649	0.513692	0	0	0	0.0019084	0	0	N	N	N	N	N	N	N	N	N	N	N	N	N	CSQ=C|intron_variant|MODIFIER|ASB11|ENSG00000165192|Transcript|ENST00000344384.8|protein_coding||1/6||||||||rs778918010||-1||HGNC|HGNC:17186||5|A1|||0.0003|||||||||||||||||||||||4.424|0.228086|0.868|,C|intron_variant|MODIFIER|ASB11|ENSG00000165192|Transcript|ENST00000380470.7|protein_coding||1/6||||||||rs778918010||-1||HGNC|HGNC:17186||1||||0.0003|||||||||||||||||||||||4.424|0.228086|0.868|,C|int…	N	N	4.424	0.868	N	N
X	15313604	rs180991004	C	T	C	T	0.00100972	0	0	0	0.00299103	0	0	0.00166548	0	0.00290698	0	0	0	0.0121951	0	0.0021322	0	0	0	0.00689655	0	CSQ=T|intron_variant|MODIFIER|ASB11|ENSG00000165192|Transcript|ENST00000344384.8|protein_coding||1/6||||||||rs180991004||-1||HGNC|HGNC:17186||5|A1|||0.0008|0.003|0|0|0|0||||||||||||||||||2.852|0.105020|0.868|,T|intron_variant|MODIFIER|ASB11|ENSG00000165192|Transcript|ENST00000380470.7|protein_coding||1/6||||||||rs180991004||-1||HGNC|HGNC:17186||1||||0.0008|0.003|0|0|0|0||||||||||||||||||2.852|0.1…	N	N	2.852	0.868	N	N
X	15313614	rs187104453	T	C	T	C	0.00164079	0	0	0	0.00598205	0	0	0.00142755	0	0	0	0	0	0	0	0	0	0	0	0	0	CSQ=C|intron_variant|MODIFIER|ASB11|ENSG00000165192|Transcript|ENST00000344384.8|protein_coding||1/6||||||||rs187104453||-1||HGNC|HGNC:17186||5|A1|||0.0016|0.006|0|0|0|0||||||||||||||||||2.322|0.058229|0.868|,C|intron_variant|MODIFIER|ASB11|ENSG00000165192|Transcript|ENST00000380470.7|protein_coding||1/6||||||||rs187104453||-1||HGNC|HGNC:17186||1||||0.0016|0.006|0|0|0|0||||||||||||||||||2.322|0.0…	N	N	2.322	0.868	N	N
X	15313638	.	A	G	A	G	0.00370861	0.513692	0	0	0	0	0.0194986	0	N	N	N	N	N	N	N	N	N	N	N	N	N	CSQ=G|intron_variant|MODIFIER|ASB11|ENSG00000165192|Transcript|ENST00000344384.8|protein_coding||1/6||||||||rs573303390||-1||HGNC|HGNC:17186||5|A1|||0.0037|||||||||||||||||||||||5.305|0.300458|0.868|,G|intron_variant|MODIFIER|ASB11|ENSG00000165192|Transcript|ENST00000380470.7|protein_coding||1/6||||||||rs573303390||-1||HGNC|HGNC:17186||1||||0.0037|||||||||||||||||||||||5.305|0.300458|0.868|,G|int…	N	N	5.305	0.868	N	N
X	15313644	.	T	G	T	G	0.0002649	0.513692	0.0013089	0	0	0	0	0	N	N	N	N	N	N	N	N	N	N	N	N	N	CSQ=G|intron_variant|MODIFIER|ASB11|ENSG00000165192|Transcript|ENST00000344384.8|protein_coding||1/6||||||||rs746557501||-1||HGNC|HGNC:17186||5|A1|||0.0003|||||||||||||||||||||||6.086|0.371428|0.868|,G|intron_variant|MODIFIER|ASB11|ENSG00000165192|Transcript|ENST00000380470.7|protein_coding||1/6||||||||rs746557501||-1||HGNC|HGNC:17186||1||||0.0003|||||||||||||||||||||||6.086|0.371428|0.868|,G|int…	N	N	6.086	0.868	N	N
X	15313688	.	C	T	C	T	0.00037864	0	0	0	0.00199402	0	0	0.00047585	0	0	0	0	0	0	0	0	0	0	0	0	0	CSQ=T|intron_variant|MODIFIER|ASB11|ENSG00000165192|Transcript|ENST00000344384.8|protein_coding||1/6||||||||rs770294715||-1||HGNC|HGNC:17186||5|A1|||0.0005|||||||||||||||||||||||0.885|-0.121218|0.868|,T|intron_variant|MODIFIER|ASB11|ENSG00000165192|Transcript|ENST00000380470.7|protein_coding||1/6||||||||rs770294715||-1||HGNC|HGNC:17186||1||||0.0005|||||||||||||||||||||||0.885|-0.121218|0.868|,T|i…	N	N	0.885	0.868	N	N
X	15313693	rs149114115	C	A	C	A	0.0113593	0	0	0	0.0179462	0.00572519	0	0.015941	0.00829876	0.0348837	0.00653595	0	0	0.0731707	0.0245232	0.00852878	0	0.00189753	0	0.0344828	0	CSQ=A|intron_variant|MODIFIER|ASB11|ENSG00000165192|Transcript|ENST00000344384.8|protein_coding||1/6||||||||rs149114115||-1||HGNC|HGNC:17186||5|A1|||0.0056|0.0179|0.0057|0|0|0||||||||||||||||||1.756|0.000514|0.868|,A|intron_variant|MODIFIER|ASB11|ENSG00000165192|Transcript|ENST00000380470.7|protein_coding||1/6||||||||rs149114115||-1||HGNC|HGNC:17186||1||||0.0056|0.0179|0.0057|0|0|0|||||||||||||||…	N	N	1.756	0.868	N	N
X	15313702	rs143206039	A	G	A	G	0.04935	0	0	0.00522193	0.0727817	0.00763359	0.00278552	0.0716155	0.0788382	0.0406977	0.117647	0.0555556	0.0330578	0.0487805	0.0613079	0.104478	0.0526316	0.00948767	0.16318	0.144828	0.0943396	CSQ=G|intron_variant|MODIFIER|ASB11|ENSG00000165192|Transcript|ENST00000344384.8|protein_coding||1/6||||||||rs143206039||-1||HGNC|HGNC:17186||5|A1|||0.0220|0.0728|0.0076|0|0.0052|0.0028||||||||||||||||||2.298|0.055899|0.868|,G|intron_variant|MODIFIER|ASB11|ENSG00000165192|Transcript|ENST00000380470.7|protein_coding||1/6||||||||rs143206039||-1||HGNC|HGNC:17186||1||||0.0220|0.0728|0.0076|0|0.0052|0…	N	N	2.298	0.868	N	N
X	15313712	.	T	C	T	C	0.00048216	0.486308	N	N	N	N	N	0	0	0	0	0	0	0	0	0	0	0	0	0	0	CSQ=C|intron_variant|MODIFIER|ASB11|ENSG00000165192|Transcript|ENST00000344384.8|protein_coding||1/6||||||||||-1||HGNC|HGNC:17186||5|A1||||||||||||||||||||||||||3.504|0.157078|0.868|,C|intron_variant|MODIFIER|ASB11|ENSG00000165192|Transcript|ENST00000380470.7|protein_coding||1/6||||||||||-1||HGNC|HGNC:17186||1|||||||||||||||||||||||||||3.504|0.157078|0.868|,C|intron_variant|MODIFIER|ASB11|ENSG000…	N	N	3.504	0.868	N	N
X	15313719	.	A	G	A	G	0.0012054	0.486308	N	N	N	N	N	0.00125	0	0.00581395	0	0	0	0	0	0.0021322	0	0.00189753	0	0	0	CSQ=G|intron_variant|MODIFIER|ASB11|ENSG00000165192|Transcript|ENST00000344384.8|protein_coding||1/6||||||||rs1012264751||-1||HGNC|HGNC:17186||5|A1||||||||||||||||||||||||||4.032|0.197631|0.868|,G|intron_variant|MODIFIER|ASB11|ENSG00000165192|Transcript|ENST00000380470.7|protein_coding||1/6||||||||rs1012264751||-1||HGNC|HGNC:17186||1|||||||||||||||||||||||||||4.032|0.197631|0.868|,G|intron_varian…	N	N	4.032	0.868	N	N
X	15313721	rs148086085	G	A	G	A	0.00858261	0	0	0	0.0239282	0.0019084	0	0.0118963	0.00414938	0.0174419	0.00653595	0	0.0165289	0	0	0.021322	0.0526316	0	0.0167364	0	0	CSQ=A|intron_variant|MODIFIER|ASB11|ENSG00000165192|Transcript|ENST00000344384.8|protein_coding||1/6||||||||rs148086085||-1||HGNC|HGNC:17186||5|A1|||0.0066|0.0239|0.0019|0|0|0||||||||||||||||||1.980|0.024532|0.868|,A|intron_variant|MODIFIER|ASB11|ENSG00000165192|Transcript|ENST00000380470.7|protein_coding||1/6||||||||rs148086085||-1||HGNC|HGNC:17186||1||||0.0066|0.0239|0.0019|0|0|0|||||||||||||||…	N	N	1.98	0.868	N	N
X	15313780	.	G	A	G	A	0.0002649	0.513692	0	0	0.00099701	0	0	0.00099701	N	N	N	N	N	N	N	N	N	N	N	N	N	CSQ=A|intron_variant|MODIFIER|ASB11|ENSG00000165192|Transcript|ENST00000344384.8|protein_coding||1/6||||||||rs774759657||-1||HGNC|HGNC:17186||5|A1|||0.0003|||||||||||||||||||||||0.624|-0.177285|0.868|,A|intron_variant|MODIFIER|ASB11|ENSG00000165192|Transcript|ENST00000380470.7|protein_coding||1/6||||||||rs774759657||-1||HGNC|HGNC:17186||1||||0.0003|||||||||||||||||||||||0.624|-0.177285|0.868|,A|i…	N	N	0.624	0.868	N	N
X	15313790	.	G	A	G	A	0.0002649	0.513692	0	0	0	0	0.00139276	0	N	N	N	N	N	N	N	N	N	N	N	N	N	CSQ=A|intron_variant|MODIFIER|ASB11|ENSG00000165192|Transcript|ENST00000344384.8|protein_coding||1/6||||||||rs762111472||-1||HGNC|HGNC:17186||5|A1|||0.0003|||||||||||||||||||||||2.971|0.114873|0.868|,A|intron_variant|MODIFIER|ASB11|ENSG00000165192|Transcript|ENST00000380470.7|protein_coding||1/6||||||||rs762111472||-1||HGNC|HGNC:17186||1||||0.0003|||||||||||||||||||||||2.971|0.114873|0.868|,A|int…	N	N	2.971	0.868	N	N
X	15313812	.	G	A	G	A	0.0005298	0.513692	0	0.00130548	0	0.0019084	0	0	N	N	N	N	N	N	N	N	N	N	N	N	N	CSQ=A|intron_variant|MODIFIER|ASB11|ENSG00000165192|Transcript|ENST00000344384.8|protein_coding||1/6||||||||rs768076405||-1||HGNC|HGNC:17186||5|A1|||0.0005|||||||||||||||||||||||0.671|-0.165965|0.868|,A|intron_variant|MODIFIER|ASB11|ENSG00000165192|Transcript|ENST00000380470.7|protein_coding||1/6||||||||rs768076405||-1||HGNC|HGNC:17186||1||||0.0005|||||||||||||||||||||||0.671|-0.165965|0.868|,A|i…	N	N	0.671	0.868	N	N
X	15313823	.	G	A	G	A	0.0012054	0.486308	N	N	N	N	N	0.0009375	0	0.00290698	0	0	0	0	0.0013624	0.0021322	0	0	0	0	0	CSQ=A|intron_variant|MODIFIER|ASB11|ENSG00000165192|Transcript|ENST00000344384.8|protein_coding||1/6||||||||rs911126615||-1||HGNC|HGNC:17186||5|A1||||||||||||||||||||||||||0.680|-0.163926|0.868|,A|intron_variant|MODIFIER|ASB11|ENSG00000165192|Transcript|ENST00000380470.7|protein_coding||1/6||||||||rs911126615||-1||HGNC|HGNC:17186||1|||||||||||||||||||||||||||0.680|-0.163926|0.868|,A|intron_varian…	N	N	0.68	0.868	N	N
X	15313827	.	G	A	G	A	0.00024108	0.486308	N	N	N	N	N	0.0003125	0	0	0	0	0	0.0121951	0	0	0	0	0	0	0	CSQ=A|intron_variant|MODIFIER|ASB11|ENSG00000165192|Transcript|ENST00000344384.8|protein_coding||1/6||||||||rs1413784487||-1||HGNC|HGNC:17186||5|A1||||||||||||||||||||||||||0.594|-0.184935|0.868|,A|intron_variant|MODIFIER|ASB11|ENSG00000165192|Transcript|ENST00000380470.7|protein_coding||1/6||||||||rs1413784487||-1||HGNC|HGNC:17186||1|||||||||||||||||||||||||||0.594|-0.184935|0.868|,A|intron_vari…	N	N	0.594	0.868	N	N
X	15313833	.	T	TGAGGTCAGGAGTTC	T	TGAGGTCAGGAGTTC	0.00024108	0.486308	N	N	N	N	N	0.0003125	0	0.00290698	0	0	0	0	0	0	0	0	0	0	0	CSQ=GAGGTCAGGAGTTC|intron_variant|MODIFIER|ASB11|ENSG00000165192|Transcript|ENST00000344384.8|protein_coding||1/6||||||||||-1||HGNC|HGNC:17186||5|A1||||||||||||||||||||||||||||0.868|,GAGGTCAGGAGTTC|intron_variant|MODIFIER|ASB11|ENSG00000165192|Transcript|ENST00000380470.7|protein_coding||1/6||||||||||-1||HGNC|HGNC:17186||1|||||||||||||||||||||||||||||0.868|,GAGGTCAGGAGTTC|intron_variant|MODIFIER|…	N	N	N	0.868	N	N
X	15313835	.	A	T	A	T	0.00024108	0.486308	N	N	N	N	N	0.0003125	0	0	0	0	0	0	0.0013624	0	0	0	0	0	0	CSQ=T|intron_variant|MODIFIER|ASB11|ENSG00000165192|Transcript|ENST00000344384.8|protein_coding||1/6||||||||||-1||HGNC|HGNC:17186||5|A1||||||||||||||||||||||||||3.906|0.187976|0.868|,T|intron_variant|MODIFIER|ASB11|ENSG00000165192|Transcript|ENST00000380470.7|protein_coding||1/6||||||||||-1||HGNC|HGNC:17186||1|||||||||||||||||||||||||||3.906|0.187976|0.868|,T|intron_variant|MODIFIER|ASB11|ENSG000…	N	N	3.906	0.868	N	N
X	15313854	.	A	G	A	G	0.0002649	0.513692	0	0	0	0.0019084	0	0	N	N	N	N	N	N	N	N	N	N	N	N	N	CSQ=G|intron_variant|MODIFIER|ASB11|ENSG00000165192|Transcript|ENST00000344384.8|protein_coding||1/6||||||||rs773554026||-1||HGNC|HGNC:17186||5|A1|||0.0003|||||||||||||||||||||||5.787|0.343384|0.868|,G|intron_variant|MODIFIER|ASB11|ENSG00000165192|Transcript|ENST00000380470.7|protein_coding||1/6||||||||rs773554026||-1||HGNC|HGNC:17186||1||||0.0003|||||||||||||||||||||||5.787|0.343384|0.868|,G|int…	N	N	5.787	0.868	N	N
X	15313886	.	C	T	C	T	0.00024108	0.486308	N	N	N	N	N	0.0003125	0	0	0	0	0	0.0121951	0	0	0	0	0	0	0	CSQ=T|intron_variant|MODIFIER|ASB11|ENSG00000165192|Transcript|ENST00000344384.8|protein_coding||1/6||||||||||-1||HGNC|HGNC:17186||5|A1||||||||||||||||||||||||||5.476|0.315456|0.868|,T|intron_variant|MODIFIER|ASB11|ENSG00000165192|Transcript|ENST00000380470.7|protein_coding||1/6||||||||||-1||HGNC|HGNC:17186||1|||||||||||||||||||||||||||5.476|0.315456|0.868|,T|intron_variant|MODIFIER|ASB11|ENSG000…	N	N	5.476	0.868	N	N
X	15313918	.	G	A	G	A	0.0012054	0.486308	N	N	N	N	N	0.0015625	0	0	0	0	0	0	0.00681199	0	0	0	0	0	0	CSQ=A|intron_variant|MODIFIER|ASB11|ENSG00000165192|Transcript|ENST00000344384.8|protein_coding||1/6||||||||rs1225613013||-1||HGNC|HGNC:17186||5|A1||||||||||||||||||||||||||2.771|0.098240|0.868|,A|intron_variant|MODIFIER|ASB11|ENSG00000165192|Transcript|ENST00000380470.7|protein_coding||1/6||||||||rs1225613013||-1||HGNC|HGNC:17186||1|||||||||||||||||||||||||||2.771|0.098240|0.868|,A|intron_varian…	N	N	2.771	0.868	N	N
X	15313972	rs190720414	A	T	A	T	0.00366023	0	0	0	0.0109671	0	0	0.00499643	0.00829876	0.00872093	0	0	0	0	0	0	0.0263158	0	0	0.0275862	0	CSQ=T|intron_variant|MODIFIER|ASB11|ENSG00000165192|Transcript|ENST00000344384.8|protein_coding||1/6||||||||rs190720414||-1||HGNC|HGNC:17186||5|A1|||0.0029|0.011|0|0|0|0||||||||||||||||||4.852|0.262385|0.868|,T|intron_variant|MODIFIER|ASB11|ENSG00000165192|Transcript|ENST00000380470.7|protein_coding||1/6||||||||rs190720414||-1||HGNC|HGNC:17186||1||||0.0029|0.011|0|0|0|0||||||||||||||||||4.852|0.2…	N	N	4.852	0.868	N	N
X	15313975	.	C	T	C	T	0.0005298	0.513692	0	0	0.00199402	0	0	0.00199402	N	N	N	N	N	N	N	N	N	N	N	N	N	CSQ=T|intron_variant|MODIFIER|ASB11|ENSG00000165192|Transcript|ENST00000344384.8|protein_coding||1/6||||||||rs766419156||-1||HGNC|HGNC:17186||5|A1|||0.0005|||||||||||||||||||||||0.834|-0.131027|0.868|,T|intron_variant|MODIFIER|ASB11|ENSG00000165192|Transcript|ENST00000380470.7|protein_coding||1/6||||||||rs766419156||-1||HGNC|HGNC:17186||1||||0.0005|||||||||||||||||||||||0.834|-0.131027|0.868|,T|i…	N	N	0.834	0.868	N	N
X	15313976	rs181522045	G	A	G	A	0.00567967	0	0	0.00130548	0	0	0.00139276	0.00927909	0.0124481	0	0	0.0185185	0.00826446	0	0.0381471	0	0.0263158	0	0	0	0.0943396	CSQ=A|intron_variant|MODIFIER|ASB11|ENSG00000165192|Transcript|ENST00000344384.8|protein_coding||1/6||||||||rs181522045||-1||HGNC|HGNC:17186||5|A1|||0.0005|0|0|0|0.0013|0.0014||||||||||||||||||0.963|-0.107079|0.868|,A|intron_variant|MODIFIER|ASB11|ENSG00000165192|Transcript|ENST00000380470.7|protein_coding||1/6||||||||rs181522045||-1||HGNC|HGNC:17186||1||||0.0005|0|0|0|0.0013|0.0014||||||||||||||…	N	N	0.963	0.868	N	N
X	15314007	.	G	A	G	A	0.00072324	0.486308	N	N	N	N	N	0	0	0	0	0	0	0	0	0	0	0	0	0	0	CSQ=A|intron_variant|MODIFIER|ASB11|ENSG00000165192|Transcript|ENST00000344384.8|protein_coding||1/6||||||||rs1029348883||-1||HGNC|HGNC:17186||5|A1||||||||||||||||||||||||||4.947|0.270207|0.868|,A|intron_variant|MODIFIER|ASB11|ENSG00000165192|Transcript|ENST00000380470.7|protein_coding||1/6||||||||rs1029348883||-1||HGNC|HGNC:17186||1|||||||||||||||||||||||||||4.947|0.270207|0.868|,A|intron_varian…	N	N	4.947	0.868	N	N
X	15314044	rs186992638	C	G	C	G	0.00211921	0.513692	0	0.0078329	0.00099701	0.0019084	0	0.00099701	N	N	N	N	N	N	N	N	N	N	N	N	N	CSQ=G|intron_variant|MODIFIER|ASB11|ENSG00000165192|Transcript|ENST00000344384.8|protein_coding||1/6||||||||rs186992638||-1||HGNC|HGNC:17186||5|A1|||0.0021|0.001|0.0019|0|0.0078|0||||||||||||||||||4.551|0.238169|0.868|,G|intron_variant|MODIFIER|ASB11|ENSG00000165192|Transcript|ENST00000380470.7|protein_coding||1/6||||||||rs186992638||-1||HGNC|HGNC:17186||1||||0.0021|0.001|0.0019|0|0.0078|0|||||||…	N	N	4.551	0.868	N	N
X	15314049	.	C	T	C	T	0.0007947	0.513692	0.0039267	0	0	0	0	0	N	N	N	N	N	N	N	N	N	N	N	N	N	CSQ=T|intron_variant|MODIFIER|ASB11|ENSG00000165192|Transcript|ENST00000344384.8|protein_coding||1/6||||||||rs765495633||-1||HGNC|HGNC:17186||5|A1|||0.0008|||||||||||||||||||||||4.868|0.263728|0.868|,T|intron_variant|MODIFIER|ASB11|ENSG00000165192|Transcript|ENST00000380470.7|protein_coding||1/6||||||||rs765495633||-1||HGNC|HGNC:17186||1||||0.0008|||||||||||||||||||||||4.868|0.263728|0.868|,T|int…	N	N	4.868	0.868	N	N
X	15314055	.	CT	C	C	C	0.00024178	0.487473	N	N	N	N	N	0.00031289	0	0	0	0	0	0	0	0	0	0.00189753	0	0	0	CSQ=-|intron_variant|MODIFIER|ASB11|ENSG00000165192|Transcript|ENST00000344384.8|protein_coding||1/6||||||||||-1||HGNC|HGNC:17186||5|A1||||||||||||||||||||||||||||0.868|,-|intron_variant|MODIFIER|ASB11|ENSG00000165192|Transcript|ENST00000380470.7|protein_coding||1/6||||||||||-1||HGNC|HGNC:17186||1|||||||||||||||||||||||||||||0.868|,-|intron_variant|MODIFIER|ASB11|ENSG00000165192|Transcript|ENST00…	N	N	N	0.868	N	N
X	15314072	.	A	C	A	C	0.00211921	0.513692	0	0	0	0	0.0111421	0	N	N	N	N	N	N	N	N	N	N	N	N	N	CSQ=C|intron_variant|MODIFIER|ASB11|ENSG00000165192|Transcript|ENST00000344384.8|protein_coding||1/6||||||||rs752542312||-1||HGNC|HGNC:17186||5|A1|||0.0021|||||||||||||||||||||||5.191|0.290738|0.868|,C|intron_variant|MODIFIER|ASB11|ENSG00000165192|Transcript|ENST00000380470.7|protein_coding||1/6||||||||rs752542312||-1||HGNC|HGNC:17186||1||||0.0021|||||||||||||||||||||||5.191|0.290738|0.868|,C|int…	N	N	5.191	0.868	N	N
X	15314077	.	AAG	A	A	A	0.00024108	0.486308	N	N	N	N	N	0	0	0	0	0	0	0	0	0	0	0	0	0	0	CSQ=-|intron_variant|MODIFIER|ASB11|ENSG00000165192|Transcript|ENST00000344384.8|protein_coding||1/6||||||||||-1||HGNC|HGNC:17186||5|A1||||||||||||||||||||||||||||0.868|,-|intron_variant|MODIFIER|ASB11|ENSG00000165192|Transcript|ENST00000380470.7|protein_coding||1/6||||||||||-1||HGNC|HGNC:17186||1|||||||||||||||||||||||||||||0.868|,-|intron_variant|MODIFIER|ASB11|ENSG00000165192|Transcript|ENST00…	N	N	N	0.868	N	N
X	15314119	.	G	A	G	A	0.0012054	0.486308	N	N	N	N	N	0.0015625	0	0	0	0	0	0	0.00681199	0	0	0	0	0	0	CSQ=A|intron_variant|MODIFIER|ASB11|ENSG00000165192|Transcript|ENST00000344384.8|protein_coding||1/6||||||||rs918509938||-1||HGNC|HGNC:17186||5|A1||||||||||||||||||||||||||0.967|-0.106466|0.868|,A|intron_variant|MODIFIER|ASB11|ENSG00000165192|Transcript|ENST00000380470.7|protein_coding||1/6||||||||rs918509938||-1||HGNC|HGNC:17186||1|||||||||||||||||||||||||||0.967|-0.106466|0.868|,A|intron_varian…	N	N	0.967	0.868	N	N
X	15314141	.	T	A	T	A	0.0007947	0.513692	0	0	0	0	0.00417827	0	N	N	N	N	N	N	N	N	N	N	N	N	N	CSQ=A|intron_variant|MODIFIER|ASB11|ENSG00000165192|Transcript|ENST00000344384.8|protein_coding||1/6||||||||rs758085948||-1||HGNC|HGNC:17186||5|A1|||0.0008|||||||||||||||||||||||10.29|0.835741|0.868|,A|intron_variant|MODIFIER|ASB11|ENSG00000165192|Transcript|ENST00000380470.7|protein_coding||1/6||||||||rs758085948||-1||HGNC|HGNC:17186||1||||0.0008|||||||||||||||||||||||10.29|0.835741|0.868|,A|int…	N	N	10.29	0.868	N	N
X	15314212	rs189913638	T	A	T	A	0.0002649	0.513692	0	0	0.00099701	0	0	0.00099701	N	N	N	N	N	N	N	N	N	N	N	N	N	CSQ=A|intron_variant|MODIFIER|ASB11|ENSG00000165192|Transcript|ENST00000344384.8|protein_coding||1/6||||||||rs189913638||-1||HGNC|HGNC:17186||5|A1|||0.0003|0.001|0|0|0|0||||||||||||||||||4.381|0.224694|0.868|,A|intron_variant|MODIFIER|ASB11|ENSG00000165192|Transcript|ENST00000380470.7|protein_coding||1/6||||||||rs189913638||-1||HGNC|HGNC:17186||1||||0.0003|0.001|0|0|0|0||||||||||||||||||4.381|0.2…	N	N	4.381	0.868	N	N
X	15314234	rs57936733	T	C	C	C	0.0677774	0	0	0.00522193	0.140578	0.0133588	0.0139276	0.0985011	0.0829875	0.0610465	0.124183	0.0740741	0.0413223	0.0609756	0.0613079	0.10661	0.105263	0.0151803	0.23431	0.172414	0.207547	CSQ=C|intron_variant|MODIFIER|ASB11|ENSG00000165192|Transcript|ENST00000344384.8|protein_coding||1/6||||||||rs57936733||-1||HGNC|HGNC:17186||5|A1|||0.0429|0.1406|0.0134|0|0.0052|0.0139||||||||||||||||||5.287|0.298949|0.868|,C|intron_variant|MODIFIER|ASB11|ENSG00000165192|Transcript|ENST00000380470.7|protein_coding||1/6||||||||rs57936733||-1||HGNC|HGNC:17186||1||||0.0429|0.1406|0.0134|0|0.0052|0.0…	N	N	5.287	0.868	N	N
X	15314293	.	A	C	A	C	0.00024108	0.486308	N	N	N	N	N	0.0003125	0.00414938	0	0	0	0	0	0	0	0	0	0	0	0	CSQ=C|intron_variant|MODIFIER|ASB11|ENSG00000165192|Transcript|ENST00000344384.8|protein_coding||1/6||||||||rs999244584||-1||HGNC|HGNC:17186||5|A1||||||||||||||||||||||||||5.044|0.278291|0.868|,C|intron_variant|MODIFIER|ASB11|ENSG00000165192|Transcript|ENST00000380470.7|protein_coding||1/6||||||||rs999244584||-1||HGNC|HGNC:17186||1|||||||||||||||||||||||||||5.044|0.278291|0.868|,C|intron_variant|…	N	N	5.044	0.868	N	N
X	15314310	.	A	C	A	C	0.0002649	0.513692	0	0	0	0	0.00139276	0	N	N	N	N	N	N	N	N	N	N	N	N	N	CSQ=C|intron_variant|MODIFIER|ASB11|ENSG00000165192|Transcript|ENST00000344384.8|protein_coding||1/6||||||||rs757182711||-1||HGNC|HGNC:17186||5|A1|||0.0003|||||||||||||||||||||||8.589|0.647321|0.868|,C|intron_variant|MODIFIER|ASB11|ENSG00000165192|Transcript|ENST00000380470.7|protein_coding||1/6||||||||rs757182711||-1||HGNC|HGNC:17186||1||||0.0003|||||||||||||||||||||||8.589|0.647321|0.868|,C|int…	N	N	8.589	0.868	N	N
X	15314335	rs375554656	T	G	T	G	0.00096432	0.486308	N	N	N	N	N	0.00125	0	0.0116279	0	0	0	0	0	0	0	0	0	0	0	CSQ=G|intron_variant|MODIFIER|ASB11|ENSG00000165192|Transcript|ENST00000344384.8|protein_coding||1/6||||||||rs375554656||-1||HGNC|HGNC:17186||5|A1|||||||||6.699e-05|0.0006824|0|0|0|0|0|0|0|||||||||4.712|0.251050|0.868|,G|intron_variant|MODIFIER|ASB11|ENSG00000165192|Transcript|ENST00000380470.7|protein_coding||1/6||||||||rs375554656||-1||HGNC|HGNC:17186||1||||||||||6.699e-05|0.0006824|0|0|0|0|0|0…	N	N	4.712	0.868	N	N
X	15314397	.	C	A	C	A	0.0002649	0.513692	0	0	0	0	0.00139276	0	N	N	N	N	N	N	N	N	N	N	N	N	N	CSQ=A|synonymous_variant|LOW|ASB11|ENSG00000165192|Transcript|ENST00000344384.8|protein_coding|1/7||||163|90|30|G|ggG/ggT|rs761126982||-1||HGNC|HGNC:17186||5|A1|||0.0003||||||5.188e-05|0|0|0|0|0|0|0|0.000526|||||||||19.27|2.083917|0.868|,A|intron_variant|MODIFIER|ASB11|ENSG00000165192|Transcript|ENST00000380470.7|protein_coding||1/6||||||||rs761126982||-1||HGNC|HGNC:17186||1||||0.0003||||||5.188e…	N	N	19.27	0.868	N	N
X	15314421	.	T	C	T	C	0.00024108	0.486308	N	N	N	N	N	0.0003125	0	0	0	0	0	0.0121951	0	0	0	0	0	0	0	CSQ=C|synonymous_variant|LOW|ASB11|ENSG00000165192|Transcript|ENST00000344384.8|protein_coding|1/7||||139|66|22|G|ggA/ggG|rs1321066964||-1||HGNC|HGNC:17186||5|A1||||||||||||||||||||||||||7.747|0.547352|0.868|,C|intron_variant|MODIFIER|ASB11|ENSG00000165192|Transcript|ENST00000380470.7|protein_coding||1/6||||||||rs1321066964||-1||HGNC|HGNC:17186||1|||||||||||||||||||||||||||7.747|0.547352|0.868|,C…	N	N	7.747	0.868	N	N
X	15314424	.	G	A	G	A	0.0002649	0.513692	0	0.00130548	0	0	0	0	N	N	N	N	N	N	N	N	N	N	N	N	N	CSQ=A|synonymous_variant|LOW|ASB11|ENSG00000165192|Transcript|ENST00000344384.8|protein_coding|1/7||||136|63|21|S|tcC/tcT|rs766894772||-1||HGNC|HGNC:17186||5|A1|||0.0003||||||4.477e-05|0|0|0|0|0|8.711e-05|0.000228|0|||||||||1.389|-0.043494|0.868|,A|intron_variant|MODIFIER|ASB11|ENSG00000165192|Transcript|ENST00000380470.7|protein_coding||1/6||||||||rs766894772||-1||HGNC|HGNC:17186||1||||0.0003|||…	N	N	1.389	0.868	N	N
X	15314436	rs5935944	A	G	A	G	0.274139	0	0.420157	0.387728	0.139581	0.28626	0.623955	0.177254	0.236515	0.142442	0.169935	0.203704	0.31405	0.170732	0.257493	0.0362473	0.236842	0.197343	0.179916	0.262069	0.188679	CSQ=G|synonymous_variant|LOW|ASB11|ENSG00000165192|Transcript|ENST00000344384.8|protein_coding|1/7||||124|51|17|R|cgT/cgC|rs5935944&COSV60354240||-1||HGNC|HGNC:17186||5|A1|||0.3592|0.1396|0.2863|0.4202|0.3877|0.624|0.3744|0.1797|0.2819|0.2967|0.3869|0.4464|0.3887|0.3647|0.5494||0&1|0&1||||||10.59|0.865536|0.868|,G|intron_variant|MODIFIER|ASB11|ENSG00000165192|Transcript|ENST00000380470.7|protein_…	N	N	10.59	0.868	N	N
X	15314595	rs182509376	G	A	G	A	0.00353401	0	0	0	0.00997009	0	0	0.00475851	0.00829876	0.00872093	0	0	0	0	0	0	0.0263158	0	0	0.0275862	0	CSQ=A|downstream_gene_variant|MODIFIER|PIGA|ENSG00000165195|Transcript|ENST00000333590.5|protein_coding||||||||||rs182509376|4856|-1||HGNC|HGNC:8957||1|P1|||0.0026|0.01|0|0|0|0||||||||||||||||||17.63|1.830237||,A|upstream_gene_variant|MODIFIER|ASB11|ENSG00000165192|Transcript|ENST00000344384.8|protein_coding||||||||||rs182509376|36|-1||HGNC|HGNC:17186||5|A1|||0.0026|0.01|0|0|0|0||||||||||||||||||…	N	N	17.63	N	N	N
X	15314623	.	C	T	C	T	0.0002649	0.513692	0	0	0	0	0.00139276	0	N	N	N	N	N	N	N	N	N	N	N	N	N	CSQ=T|downstream_gene_variant|MODIFIER|PIGA|ENSG00000165195|Transcript|ENST00000333590.5|protein_coding||||||||||rs540193874|4828|-1||HGNC|HGNC:8957||1|P1|||0.0003|||||||||||||||||||||||18.06|1.899100||,T|upstream_gene_variant|MODIFIER|ASB11|ENSG00000165192|Transcript|ENST00000344384.8|protein_coding||||||||||rs540193874|64|-1||HGNC|HGNC:17186||5|A1|||0.0003|||||||||||||||||||||||18.06|1.899100|0…	N	N	18.06	N	N	N
X	15314639	rs138884464	G	A	G	A	0.00227187	0	0	0.00913838	0	0.0019084	0.00139276	0.00214133	0	0	0	0	0	0	0.0122616	0	0	0	0	0	0	CSQ=A|downstream_gene_variant|MODIFIER|PIGA|ENSG00000165195|Transcript|ENST00000333590.5|protein_coding||||||||||rs138884464|4812|-1||HGNC|HGNC:8957||1|P1|||0.0024|0|0.0019|0|0.0091|0.0014||||||||||||||||||16.71|1.672488||,A|upstream_gene_variant|MODIFIER|ASB11|ENSG00000165192|Transcript|ENST00000344384.8|protein_coding||||||||||rs138884464|80|-1||HGNC|HGNC:17186||5|A1|||0.0024|0|0.0019|0|0.0091|…	N	N	16.71	N	N	N
X	15314648	rs185625297	G	A	G	A	0.0005298	0.513692	0.0026178	0	0	0	0	0	N	N	N	N	N	N	N	N	N	N	N	N	N	CSQ=A|downstream_gene_variant|MODIFIER|PIGA|ENSG00000165195|Transcript|ENST00000333590.5|protein_coding||||||||||rs185625297|4803|-1||HGNC|HGNC:8957||1|P1|||0.0005|0|0|0.0026|0|0||||||||||||||||||16.31|1.603174||,A|upstream_gene_variant|MODIFIER|ASB11|ENSG00000165192|Transcript|ENST00000344384.8|protein_coding||||||||||rs185625297|89|-1||HGNC|HGNC:17186||5|A1|||0.0005|0|0|0.0026|0|0||||||||||||||…	N	N	16.31	N	N	N
X	15314671	.	A	G	A	G	0.00024108	0.486308	N	N	N	N	N	0.0003125	0	0	0	0	0.00826446	0	0	0	0	0	0	0	0	CSQ=G|downstream_gene_variant|MODIFIER|PIGA|ENSG00000165195|Transcript|ENST00000333590.5|protein_coding|||||||||||4780|-1||HGNC|HGNC:8957||1|P1||||||||||||||||||||||||||14.85|1.356780||,G|upstream_gene_variant|MODIFIER|ASB11|ENSG00000165192|Transcript|ENST00000344384.8|protein_coding|||||||||||112|-1||HGNC|HGNC:17186||5|A1||||||||||||||||||||||||||14.85|1.356780|0.868|,G|intron_variant|MODIFIER|A…	N	N	14.85	N	N	N
X	15314712	rs372034466	T	G	T	G	0.0002649	0.513692	0.0013089	0	0	0	0	0	N	N	N	N	N	N	N	N	N	N	N	N	N	CSQ=G|downstream_gene_variant|MODIFIER|PIGA|ENSG00000165195|Transcript|ENST00000333590.5|protein_coding||||||||||rs372034466|4739|-1||HGNC|HGNC:8957||1|P1|||0.0003|0|0|0.0013|0|0||||||||||||||||||14.18|1.248727||,G|upstream_gene_variant|MODIFIER|ASB11|ENSG00000165192|Transcript|ENST00000344384.8|protein_coding||||||||||rs372034466|153|-1||HGNC|HGNC:17186||5|A1|||0.0003|0|0|0.0013|0|0|||||||||||||…	N	N	14.18	N	N	N
X	15314713	.	C	T	C	T	0.00024108	0.486308	N	N	N	N	N	0.0003125	0	0	0	0	0.00826446	0	0	0	0	0	0	0	0	CSQ=T|downstream_gene_variant|MODIFIER|PIGA|ENSG00000165195|Transcript|ENST00000333590.5|protein_coding|||||||||||4738|-1||HGNC|HGNC:8957||1|P1||||||||||||||||||||||||||12.65|1.047912||,T|upstream_gene_variant|MODIFIER|ASB11|ENSG00000165192|Transcript|ENST00000344384.8|protein_coding|||||||||||154|-1||HGNC|HGNC:17186||5|A1||||||||||||||||||||||||||12.65|1.047912|0.868|,T|intron_variant|MODIFIER|A…	N	N	12.65	N	N	N
X	15314740	.	A	G	A	G	0.0012054	0.486308	N	N	N	N	N	0.00125	0	0	0	0	0.0330578	0	0	0	0	0	0	0	0	CSQ=G|downstream_gene_variant|MODIFIER|PIGA|ENSG00000165195|Transcript|ENST00000333590.5|protein_coding||||||||||rs574200342|4711|-1||HGNC|HGNC:8957||1|P1||||||||||||||||||||||||||11.43|0.941510||,G|upstream_gene_variant|MODIFIER|ASB11|ENSG00000165192|Transcript|ENST00000344384.8|protein_coding||||||||||rs574200342|181|-1||HGNC|HGNC:17186||5|A1||||||||||||||||||||||||||11.43|0.941510|0.868|,G|int…	N	N	11.43	N	N	N
X	15314749	.	T	C	T	C	0.0002649	0.513692	0	0	0.00099701	0	0	0.00099701	N	N	N	N	N	N	N	N	N	N	N	N	N	CSQ=C|downstream_gene_variant|MODIFIER|PIGA|ENSG00000165195|Transcript|ENST00000333590.5|protein_coding||||||||||rs751361645|4702|-1||HGNC|HGNC:8957||1|P1|||0.0003|||||||||||||||||||||||8.081|0.586451||,C|upstream_gene_variant|MODIFIER|ASB11|ENSG00000165192|Transcript|ENST00000344384.8|protein_coding||||||||||rs751361645|190|-1||HGNC|HGNC:17186||5|A1|||0.0003|||||||||||||||||||||||8.081|0.586451|…	N	N	8.081	N	N	N
X	15314760	.	C	A	C	A	0.0002649	0.513692	0	0	0	0	0.00139276	0	N	N	N	N	N	N	N	N	N	N	N	N	N	CSQ=A|downstream_gene_variant|MODIFIER|PIGA|ENSG00000165195|Transcript|ENST00000333590.5|protein_coding||||||||||rs757203355|4691|-1||HGNC|HGNC:8957||1|P1|||0.0003|||||||||||||||||||||||0.925|-0.113941||,A|upstream_gene_variant|MODIFIER|ASB11|ENSG00000165192|Transcript|ENST00000344384.8|protein_coding||||||||||rs757203355|201|-1||HGNC|HGNC:17186||5|A1|||0.0003|||||||||||||||||||||||0.925|-0.11394…	N	N	0.925	N	N	N
X	15314773	.	T	C	T	C	0.0002649	0.513692	0	0	0.00099701	0	0	0.00099701	N	N	N	N	N	N	N	N	N	N	N	N	N	CSQ=C|downstream_gene_variant|MODIFIER|PIGA|ENSG00000165195|Transcript|ENST00000333590.5|protein_coding||||||||||rs781053483|4678|-1||HGNC|HGNC:8957||1|P1|||0.0003|||||||||||||||||||||||3.352|0.145239||,C|upstream_gene_variant|MODIFIER|ASB11|ENSG00000165192|Transcript|ENST00000344384.8|protein_coding||||||||||rs781053483|214|-1||HGNC|HGNC:17186||5|A1|||0.0003|||||||||||||||||||||||3.352|0.145239|…	N	N	3.352	N	N	N
X	15314786	.	A	G	A	G	0.0002649	0.513692	0	0	0.00099701	0	0	0.00099701	N	N	N	N	N	N	N	N	N	N	N	N	N	CSQ=G|downstream_gene_variant|MODIFIER|PIGA|ENSG00000165195|Transcript|ENST00000333590.5|protein_coding||||||||||rs749942633|4665|-1||HGNC|HGNC:8957||1|P1|||0.0003|||||||||||||||||||||||3.773|0.177762||,G|upstream_gene_variant|MODIFIER|ASB11|ENSG00000165192|Transcript|ENST00000344384.8|protein_coding||||||||||rs749942633|227|-1||HGNC|HGNC:17186||5|A1|||0.0003|||||||||||||||||||||||3.773|0.177762|…	N	N	3.773	N	N	N
X	15314812	.	A	T	A	T	0.00072324	0.486308	N	N	N	N	N	0	0	0	0	0	0	0	0	0	0	0	0	0	0	CSQ=T|downstream_gene_variant|MODIFIER|PIGA|ENSG00000165195|Transcript|ENST00000333590.5|protein_coding|||||||||||4639|-1||HGNC|HGNC:8957||1|P1||||||||||||||||||||||||||6.055|0.368506||,T|upstream_gene_variant|MODIFIER|ASB11|ENSG00000165192|Transcript|ENST00000344384.8|protein_coding|||||||||||253|-1||HGNC|HGNC:17186||5|A1||||||||||||||||||||||||||6.055|0.368506|0.868|,T|intron_variant|MODIFIER|A…	N	N	6.055	N	N	N
X	15314891	rs189660475	G	T	G	T	0.0005298	0.513692	0	0	0	0.00381679	0	0	N	N	N	N	N	N	N	N	N	N	N	N	N	CSQ=T|downstream_gene_variant|MODIFIER|PIGA|ENSG00000165195|Transcript|ENST00000333590.5|protein_coding||||||||||rs189660475|4560|-1||HGNC|HGNC:8957||1|P1|||0.0005|0|0.0038|0|0|0||||||||||||||||||2.281|0.054319||,T|upstream_gene_variant|MODIFIER|ASB11|ENSG00000165192|Transcript|ENST00000344384.8|protein_coding||||||||||rs189660475|332|-1||HGNC|HGNC:17186||5|A1|||0.0005|0|0.0038|0|0|0|||||||||||||…	N	N	2.281	N	N	N
X	15314897	.	C	T	C	T	0.0002649	0.513692	0	0	0	0	0.00139276	0	N	N	N	N	N	N	N	N	N	N	N	N	N	CSQ=T|downstream_gene_variant|MODIFIER|PIGA|ENSG00000165195|Transcript|ENST00000333590.5|protein_coding||||||||||rs779705576|4554|-1||HGNC|HGNC:8957||1|P1|||0.0003|||||||||||||||||||||||3.077|0.123473||,T|upstream_gene_variant|MODIFIER|ASB11|ENSG00000165192|Transcript|ENST00000344384.8|protein_coding||||||||||rs779705576|338|-1||HGNC|HGNC:17186||5|A1|||0.0003|||||||||||||||||||||||3.077|0.123473|…	N	N	3.077	N	N	N
X	15314912	.	T	C	T	C	0.00024108	0.486308	N	N	N	N	N	0	0	0	0	0	0	0	0	0	0	0	0	0	0	CSQ=C|downstream_gene_variant|MODIFIER|PIGA|ENSG00000165195|Transcript|ENST00000333590.5|protein_coding||||||||||rs1169873943|4539|-1||HGNC|HGNC:8957||1|P1||||||||||||||||||||||||||0.315|-0.276046||,C|upstream_gene_variant|MODIFIER|ASB11|ENSG00000165192|Transcript|ENST00000344384.8|protein_coding||||||||||rs1169873943|353|-1||HGNC|HGNC:17186||5|A1||||||||||||||||||||||||||0.315|-0.276046|0.868|,C…	N	N	0.315	N	N	N
X	15315057	rs182968884	G	T	G	T	0.00050486	0	0	0.00130548	0	0.0019084	0	0.00047585	0	0.00581395	0	0	0	0	0	0	0	0	0	0	0	CSQ=T|downstream_gene_variant|MODIFIER|PIGA|ENSG00000165195|Transcript|ENST00000333590.5|protein_coding||||||||||rs182968884|4394|-1||HGNC|HGNC:8957||1|P1|||0.0005|0|0.0019|0|0.0013|0||||||||||||||||||0.608|-0.181487||,T|upstream_gene_variant|MODIFIER|ASB11|ENSG00000165192|Transcript|ENST00000344384.8|protein_coding||||||||||rs182968884|498|-1||HGNC|HGNC:17186||5|A1|||0.0005|0|0.0019|0|0.0013|0||…	N	N	0.608	N	N	N
X	15315123	.	A	G	A	G	0.0002649	0.513692	0	0	0	0.0019084	0	0	N	N	N	N	N	N	N	N	N	N	N	N	N	CSQ=G|downstream_gene_variant|MODIFIER|PIGA|ENSG00000165195|Transcript|ENST00000333590.5|protein_coding||||||||||rs768324026|4328|-1||HGNC|HGNC:8957||1|P1|||0.0003|||||||||||||||||||||||0.497|-0.211736||,G|upstream_gene_variant|MODIFIER|ASB11|ENSG00000165192|Transcript|ENST00000344384.8|protein_coding||||||||||rs768324026|564|-1||HGNC|HGNC:17186||5|A1|||0.0003|||||||||||||||||||||||0.497|-0.21173…	N	N	0.497	N	N	N
X	15315143	.	G	T	G	T	0.00397351	0.513692	0	0	0	0	0.0208914	0	N	N	N	N	N	N	N	N	N	N	N	N	N	CSQ=T|downstream_gene_variant|MODIFIER|PIGA|ENSG00000165195|Transcript|ENST00000333590.5|protein_coding||||||||||rs778056389|4308|-1||HGNC|HGNC:8957||1|P1|||0.0040|||||||||||||||||||||||1.332|-0.051005||,T|upstream_gene_variant|MODIFIER|ASB11|ENSG00000165192|Transcript|ENST00000344384.8|protein_coding||||||||||rs778056389|584|-1||HGNC|HGNC:17186||5|A1|||0.0040|||||||||||||||||||||||1.332|-0.05100…	N	N	1.332	N	N	N
X	15315165	.	A	C	A	C	0.00024108	0.486308	N	N	N	N	N	0.0003125	0	0	0	0	0	0	0.0013624	0	0	0	0	0	0	CSQ=C|downstream_gene_variant|MODIFIER|PIGA|ENSG00000165195|Transcript|ENST00000333590.5|protein_coding||||||||||rs1226790665|4286|-1||HGNC|HGNC:8957||1|P1||||||||||||||||||||||||||1.809|0.006411||,C|upstream_gene_variant|MODIFIER|ASB11|ENSG00000165192|Transcript|ENST00000344384.8|protein_coding||||||||||rs1226790665|606|-1||HGNC|HGNC:17186||5|A1||||||||||||||||||||||||||1.809|0.006411|0.868|,C|i…	N	N	1.809	N	N	N
X	15315170	.	ACT	A	A	A	0.0002649	0.513692	0	0	0.00099701	0	0	0.00099701	N	N	N	N	N	N	N	N	N	N	N	N	N	CSQ=-|downstream_gene_variant|MODIFIER|PIGA|ENSG00000165195|Transcript|ENST00000333590.5|protein_coding||||||||||rs747340634|4279|-1||HGNC|HGNC:8957||1|P1|||||||||||||||||||||||||||||,-|upstream_gene_variant|MODIFIER|ASB11|ENSG00000165192|Transcript|ENST00000344384.8|protein_coding||||||||||rs747340634|612|-1||HGNC|HGNC:17186||5|A1||||||||||||||||||||||||||||0.868|,-|intron_variant|MODIFIER|ASB11…	N	N	N	N	N	N
X	15315202	.	A	G	A	G	0.00238411	0.513692	0	0	0	0	0.0125348	0	N	N	N	N	N	N	N	N	N	N	N	N	N	CSQ=G|downstream_gene_variant|MODIFIER|PIGA|ENSG00000165195|Transcript|ENST00000333590.5|protein_coding||||||||||rs771345251|4249|-1||HGNC|HGNC:8957||1|P1|||0.0024|||||||||||||||||||||||6.534|0.415570||,G|upstream_gene_variant|MODIFIER|ASB11|ENSG00000165192|Transcript|ENST00000344384.8|protein_coding||||||||||rs771345251|643|-1||HGNC|HGNC:17186||5|A1|||0.0024|||||||||||||||||||||||6.534|0.415570|…	N	N	6.534	N	N	N
X	15315325	.	T	A	T	A	0.0002649	0.513692	0	0.00130548	0	0	0	0	N	N	N	N	N	N	N	N	N	N	N	N	N	CSQ=A|downstream_gene_variant|MODIFIER|PIGA|ENSG00000165195|Transcript|ENST00000333590.5|protein_coding||||||||||rs777236701|4126|-1||HGNC|HGNC:8957||1|P1|||0.0003|||||||||||||||||||||||6.448|0.406956||,A|upstream_gene_variant|MODIFIER|ASB11|ENSG00000165192|Transcript|ENST00000344384.8|protein_coding||||||||||rs777236701|766|-1||HGNC|HGNC:17186||5|A1|||0.0003|||||||||||||||||||||||6.448|0.406956|…	N	N	6.448	N	N	N
X	15315330	.	GTATAAA	G	G	G	0.0002649	0.513692	0	0.00130548	0	0	0	0	N	N	N	N	N	N	N	N	N	N	N	N	N	CSQ=-|downstream_gene_variant|MODIFIER|PIGA|ENSG00000165195|Transcript|ENST00000333590.5|protein_coding||||||||||rs759707963|4115|-1||HGNC|HGNC:8957||1|P1||||||||||||||||||||||||||7.533|0.522926||,-|upstream_gene_variant|MODIFIER|ASB11|ENSG00000165192|Transcript|ENST00000344384.8|protein_coding||||||||||rs759707963|772|-1||HGNC|HGNC:17186||5|A1||||||||||||||||||||||||||7.533|0.522926|0.868|,-|int…	N	N	7.533	N	N	N
X	15315339	.	T	C	T	C	0.00024108	0.486308	N	N	N	N	N	0.0003125	0	0	0.00653595	0	0	0	0	0	0	0	0	0	0	CSQ=C|downstream_gene_variant|MODIFIER|PIGA|ENSG00000165195|Transcript|ENST00000333590.5|protein_coding|||||||||||4112|-1||HGNC|HGNC:8957||1|P1||||||||||||||||||||||||||7.193|0.485119||,C|upstream_gene_variant|MODIFIER|ASB11|ENSG00000165192|Transcript|ENST00000344384.8|protein_coding|||||||||||780|-1||HGNC|HGNC:17186||5|A1||||||||||||||||||||||||||7.193|0.485119|0.868|,C|intron_variant|MODIFIER|A…	N	N	7.193	N	N	N
X	15315360	.	T	C	T	C	0.00024108	0.486308	N	N	N	N	N	0.0003125	0	0	0	0	0	0	0	0	0	0	0	0.00689655	0	CSQ=C|downstream_gene_variant|MODIFIER|PIGA|ENSG00000165195|Transcript|ENST00000333590.5|protein_coding|||||||||||4091|-1||HGNC|HGNC:8957||1|P1||||||||||||||||||||||||||5.432|0.311510||,C|upstream_gene_variant|MODIFIER|ASB11|ENSG00000165192|Transcript|ENST00000344384.8|protein_coding|||||||||||801|-1||HGNC|HGNC:17186||5|A1||||||||||||||||||||||||||5.432|0.311510|0.868|,C|intron_variant|MODIFIER|A…	N	N	5.432	N	N	N
X	15315373	rs188673699	T	G	T	G	0.0002649	0.513692	0.0013089	0	0	0	0	0	N	N	N	N	N	N	N	N	N	N	N	N	N	CSQ=G|downstream_gene_variant|MODIFIER|PIGA|ENSG00000165195|Transcript|ENST00000333590.5|protein_coding||||||||||rs188673699|4078|-1||HGNC|HGNC:8957||1|P1|||0.0003|0|0|0.0013|0|0||||||||||||||||||7.771|0.550137||,G|upstream_gene_variant|MODIFIER|ASB11|ENSG00000165192|Transcript|ENST00000344384.8|protein_coding||||||||||rs188673699|814|-1||HGNC|HGNC:17186||5|A1|||0.0003|0|0|0.0013|0|0|||||||||||||…	N	N	7.771	N	N	N
X	15315462	rs143402682	C	T	C	T	0.0002649	0.513692	0	0.00130548	0	0	0	0	N	N	N	N	N	N	N	N	N	N	N	N	N	CSQ=T|downstream_gene_variant|MODIFIER|PIGA|ENSG00000165195|Transcript|ENST00000333590.5|protein_coding||||||||||rs143402682|3989|-1||HGNC|HGNC:8957||1|P1|||0.0003|0|0|0|0.0013|0|0.0003126|0.0002646|0.0005421|0|0|0|0.0003017|0.000312|0.0008705|||||||||14.22|1.254914||,T|upstream_gene_variant|MODIFIER|ASB11|ENSG00000165192|Transcript|ENST00000344384.8|protein_coding||||||||||rs143402682|903|-1||HG…	N	N	14.22	N	N	N
X	15315490	.	T	C	T	C	0.0002649	0.513692	0.0013089	0	0	0	0	0	N	N	N	N	N	N	N	N	N	N	N	N	N	CSQ=C|downstream_gene_variant|MODIFIER|PIGA|ENSG00000165195|Transcript|ENST00000333590.5|protein_coding||||||||||rs763148786|3961|-1||HGNC|HGNC:8957||1|P1|||0.0003||||||1.865e-05|0|0|0|0.0002532|0|0|0|0|||||||||26.2|4.111754||,C|upstream_gene_variant|MODIFIER|ASB11|ENSG00000165192|Transcript|ENST00000344384.8|protein_coding||||||||||rs763148786|931|-1||HGNC|HGNC:17186||5|A1|||0.0003||||||1.865e-0…	N	N	26.2	N	N	N
X	15315504	rs142097387	G	T	G	T	0.00211921	0.513692	0	0.00913838	0	0	0.00139276	0	N	N	N	N	N	N	N	N	N	N	N	N	N	CSQ=T|downstream_gene_variant|MODIFIER|PIGA|ENSG00000165195|Transcript|ENST00000333590.5|protein_coding||||||||||rs142097387|3947|-1||HGNC|HGNC:8957||1|P1|||0.0021|0|0|0|0.0091|0.0014|0.004324|0.0002409|0.0009723|0.001633|0|0.0251|0.003605|0.002024|0.0004515|||||||||17.59|1.822617||,T|upstream_gene_variant|MODIFIER|ASB11|ENSG00000165192|Transcript|ENST00000344384.8|protein_coding||||||||||rs14209…	N	N	17.59	N	N	N
X	15315546	.	C	T	G	T	0.0005298	0.513692	0	0	0.00099701	0	0.00139276	0.00099701	N	N	N	N	N	N	N	N	N	N	N	N	N	CSQ=T|downstream_gene_variant|MODIFIER|PIGA|ENSG00000165195|Transcript|ENST00000333590.5|protein_coding||||||||||rs751329422&COSV60355106&COSV60356325|3905|-1||HGNC|HGNC:8957||1|P1|||0.0005||||||6.695e-05|8.172e-05|0|0|0|0|0|0|0.0006657||0&1&1|0&1&1||||||13.82|1.195036||,T|upstream_gene_variant|MODIFIER|ASB11|ENSG00000165192|Transcript|ENST00000344384.8|protein_coding||||||||||rs751329422&COSV603…	N	N	13.82	N	N	N
X	15315563	.	T	C	T	C	0.0002649	0.513692	0	0	0	0.0019084	0	0	N	N	N	N	N	N	N	N	N	N	N	N	N	CSQ=C|downstream_gene_variant|MODIFIER|PIGA|ENSG00000165195|Transcript|ENST00000333590.5|protein_coding||||||||||rs761604759|3888|-1||HGNC|HGNC:8957||1|P1|||0.0003||||||6.14e-06|0|4.439e-05|0|0|0|0|0|0|||||||||16.39|1.616959||,C|upstream_gene_variant|MODIFIER|ASB11|ENSG00000165192|Transcript|ENST00000344384.8|protein_coding||||||||||rs761604759|1004|-1||HGNC|HGNC:17186||5|A1|||0.0003||||||6.14e-0…	N	N	16.39	N	N	N
X	15315592	rs138718927	G	A	G	A	0.00675024	0.486308	N	N	N	N	N	0.0084375	0	0.0116279	0	0	0.00826446	0.0487805	0	0	0	0.0341556	0	0	0	CSQ=A|downstream_gene_variant|MODIFIER|PIGA|ENSG00000165195|Transcript|ENST00000333590.5|protein_coding||||||||||rs138718927|3859|-1||HGNC|HGNC:8957||1|P1|||||||||0.0002109|0.001701|0.0002573|0|0|0|5.774e-05|0.0005898|0|||||||||23.3|3.061423||,A|upstream_gene_variant|MODIFIER|ASB11|ENSG00000165192|Transcript|ENST00000344384.8|protein_coding||||||||||rs138718927|1033|-1||HGNC|HGNC:17186||5|A1|||||…	N	N	23.3	N	N	N
X	15315716	.	G	A	G	A	0.0002649	0.513692	0	0	0.00099701	0	0	0.00099701	N	N	N	N	N	N	N	N	N	N	N	N	N	CSQ=A|downstream_gene_variant|MODIFIER|PIGA|ENSG00000165195|Transcript|ENST00000333590.5|protein_coding||||||||||rs767477851|3735|-1||HGNC|HGNC:8957||1|P1|||0.0003|||||||||||||||||||||||7.884|0.563316||,A|upstream_gene_variant|MODIFIER|ASB11|ENSG00000165192|Transcript|ENST00000344384.8|protein_coding||||||||||rs767477851|1157|-1||HGNC|HGNC:17186||5|A1|||0.0003|||||||||||||||||||||||7.884|0.563316…	N	N	7.884	N	N	N
X	15315720	rs4830529	T	A	A	T	0.00378644	0	0	0.00913838	0.00199402	0.00572519	0	0.00333095	0.00414938	0.0116279	0.0130719	0.0185185	0.0247934	0	0.0013624	0	0	0	0	0	0	CSQ=A|downstream_gene_variant|MODIFIER|PIGA|ENSG00000165195|Transcript|ENST00000333590.5|protein_coding||||||||||rs4830529|3731|-1||HGNC|HGNC:8957||1|P1||||0.998|0.9943|1|0.9909|1||||||||||||||||||13.34|1.127684||,A|upstream_gene_variant|MODIFIER|ASB11|ENSG00000165192|Transcript|ENST00000344384.8|protein_coding||||||||||rs4830529|1161|-1||HGNC|HGNC:17186||5|A1||||0.998|0.9943|1|0.9909|1||||||||||…	N	N	13.34	N	N	N
X	15315755	.	G	C	G	C	0.0002649	0.513692	0	0	0	0	0.00139276	0	N	N	N	N	N	N	N	N	N	N	N	N	N	CSQ=C|downstream_gene_variant|MODIFIER|PIGA|ENSG00000165195|Transcript|ENST00000333590.5|protein_coding||||||||||rs756025223|3696|-1||HGNC|HGNC:8957||1|P1|||0.0003|||||||||||||||||||||||4.687|0.248986||,C|upstream_gene_variant|MODIFIER|ASB11|ENSG00000165192|Transcript|ENST00000344384.8|protein_coding||||||||||rs756025223|1196|-1||HGNC|HGNC:17186||5|A1|||0.0003|||||||||||||||||||||||4.687|0.248986…	N	N	4.687	N	N	N
X	15315911	.	TTA	T	T	T	0.00192864	0.486308	N	N	N	N	N	0.0021875	0	0.0116279	0	0	0	0.0121951	0	0.0021322	0	0	0.0041841	0	0	CSQ=-|downstream_gene_variant|MODIFIER|PIGA|ENSG00000165195|Transcript|ENST00000333590.5|protein_coding||||||||||rs1360300865|3538|-1||HGNC|HGNC:8957||1|P1||||||||||||||||||||||||||1.445|-0.036199||,-|upstream_gene_variant|MODIFIER|ASB11|ENSG00000165192|Transcript|ENST00000344384.8|protein_coding||||||||||rs1360300865|1353|-1||HGNC|HGNC:17186||5|A1||||||||||||||||||||||||||1.445|-0.036199|0.868|,…	N	N	1.445	N	N	N
X	15315925	rs193271798	A	C	A	C	0.0005298	0.513692	0.0026178	0	0	0	0	0	N	N	N	N	N	N	N	N	N	N	N	N	N	CSQ=C|downstream_gene_variant|MODIFIER|PIGA|ENSG00000165195|Transcript|ENST00000333590.5|protein_coding||||||||||rs193271798|3526|-1||HGNC|HGNC:8957||1|P1|||0.0005|0|0|0.0026|0|0||||||||||||||||||5.884|0.352364||,C|upstream_gene_variant|MODIFIER|ASB11|ENSG00000165192|Transcript|ENST00000344384.8|protein_coding||||||||||rs193271798|1366|-1||HGNC|HGNC:17186||5|A1|||0.0005|0|0|0.0026|0|0||||||||||||…	N	N	5.884	N	N	N
X	15315927	.	G	C	G	C	0.0002649	0.513692	0.0013089	0	0	0	0	0	N	N	N	N	N	N	N	N	N	N	N	N	N	CSQ=C|downstream_gene_variant|MODIFIER|PIGA|ENSG00000165195|Transcript|ENST00000333590.5|protein_coding||||||||||rs753385116|3524|-1||HGNC|HGNC:8957||1|P1|||0.0003|||||||||||||||||||||||2.143|0.040948||,C|upstream_gene_variant|MODIFIER|ASB11|ENSG00000165192|Transcript|ENST00000344384.8|protein_coding||||||||||rs753385116|1368|-1||HGNC|HGNC:17186||5|A1|||0.0003|||||||||||||||||||||||2.143|0.040948…	N	N	2.143	N	N	N
X	15315938	rs138296053	T	C	T	C	0.00370861	0.513692	0.0170157	0	0	0	0.00139276	0	N	N	N	N	N	N	N	N	N	N	N	N	N	CSQ=C|downstream_gene_variant|MODIFIER|PIGA|ENSG00000165195|Transcript|ENST00000333590.5|protein_coding||||||||||rs138296053|3513|-1||HGNC|HGNC:8957||1|P1|||0.0037|0|0|0.017|0|0.0014||||||||||||||||||0.513|-0.207018||,C|upstream_gene_variant|MODIFIER|ASB11|ENSG00000165192|Transcript|ENST00000344384.8|protein_coding||||||||||rs138296053|1379|-1||HGNC|HGNC:17186||5|A1|||0.0037|0|0|0.017|0|0.0014|||…	N	N	0.513	N	N	N
X	15315964	rs183258456	C	T	C	T	0.00366023	0	0	0	0.00299103	0	0	0.00475851	0.00414938	0.00290698	0	0	0	0	0	0.0234542	0	0	0.0167364	0	0	CSQ=T|downstream_gene_variant|MODIFIER|PIGA|ENSG00000165195|Transcript|ENST00000333590.5|protein_coding||||||||||rs183258456|3487|-1||HGNC|HGNC:8957||1|P1|||0.0008|0.003|0|0|0|0||||||||||||||||||1.287|-0.057123||,T|upstream_gene_variant|MODIFIER|ASB11|ENSG00000165192|Transcript|ENST00000344384.8|protein_coding||||||||||rs183258456|1405|-1||HGNC|HGNC:17186||5|A1|||0.0008|0.003|0|0|0|0|||||||||||||…	N	N	1.287	N	N	N
X	15316024	.	A	C	A	C	0.0002649	0.513692	0.0013089	0	0	0	0	0	N	N	N	N	N	N	N	N	N	N	N	N	N	CSQ=C|downstream_gene_variant|MODIFIER|PIGA|ENSG00000165195|Transcript|ENST00000333590.5|protein_coding||||||||||rs747363389|3427|-1||HGNC|HGNC:8957||1|P1|||0.0003|||||||||||||||||||||||5.720|0.337290||,C|upstream_gene_variant|MODIFIER|ASB11|ENSG00000165192|Transcript|ENST00000344384.8|protein_coding||||||||||rs747363389|1465|-1||HGNC|HGNC:17186||5|A1|||0.0003|||||||||||||||||||||||5.720|0.337290…	N	N	5.72	N	N	N
X	15316033	.	C	A	C	A	0.00024108	0.486308	N	N	N	N	N	0	0	0	0	0	0	0	0	0	0	0	0	0	0	CSQ=A|downstream_gene_variant|MODIFIER|PIGA|ENSG00000165195|Transcript|ENST00000333590.5|protein_coding|||||||||||3418|-1||HGNC|HGNC:8957||1|P1||||||||||||||||||||||||||1.912|0.017421||,A|upstream_gene_variant|MODIFIER|ASB11|ENSG00000165192|Transcript|ENST00000344384.8|protein_coding|||||||||||1474|-1||HGNC|HGNC:17186||5|A1||||||||||||||||||||||||||1.912|0.017421|0.868|,A|upstream_gene_variant|MO…	N	N	1.912	N	N	N
X	15316062	rs5935945	G	T	G	T	0.273886	0	0.418848	0.387728	0.139581	0.284351	0.623955	0.177254	0.236515	0.142442	0.169935	0.203704	0.31405	0.170732	0.257493	0.0362473	0.236842	0.197343	0.179916	0.262069	0.188679	CSQ=T|downstream_gene_variant|MODIFIER|PIGA|ENSG00000165195|Transcript|ENST00000333590.5|protein_coding||||||||||rs5935945|3389|-1||HGNC|HGNC:8957||1|P1|||0.3587|0.1396|0.2844|0.4188|0.3877|0.624||||||||||||||||||5.855|0.349720||,T|upstream_gene_variant|MODIFIER|ASB11|ENSG00000165192|Transcript|ENST00000344384.8|protein_coding||||||||||rs5935945|1503|-1||HGNC|HGNC:17186||5|A1|||0.3587|0.1396|0.28…	N	N	5.855	N	N	N
X	15316113	.	A	G	A	G	0.0002649	0.513692	0	0	0.00099701	0	0	0.00099701	N	N	N	N	N	N	N	N	N	N	N	N	N	CSQ=G|downstream_gene_variant|MODIFIER|PIGA|ENSG00000165195|Transcript|ENST00000333590.5|protein_coding||||||||||rs781671376|3338|-1||HGNC|HGNC:8957||1|P1|||0.0003|||||||||||||||||||||||3.777|0.178065||,G|upstream_gene_variant|MODIFIER|ASB11|ENSG00000165192|Transcript|ENST00000344384.8|protein_coding||||||||||rs781671376|1554|-1||HGNC|HGNC:17186||5|A1|||0.0003|||||||||||||||||||||||3.777|0.178065…	N	N	3.777	N	N	N
X	15316124	.	G	C	G	C	0.0010596	0.513692	0	0	0.00398804	0	0	0.00398804	N	N	N	N	N	N	N	N	N	N	N	N	N	CSQ=C|downstream_gene_variant|MODIFIER|PIGA|ENSG00000165195|Transcript|ENST00000333590.5|protein_coding||||||||||rs746415451|3327|-1||HGNC|HGNC:8957||1|P1|||0.0011|||||||||||||||||||||||1.540|-0.024499||,C|upstream_gene_variant|MODIFIER|ASB11|ENSG00000165192|Transcript|ENST00000344384.8|protein_coding||||||||||rs746415451|1565|-1||HGNC|HGNC:17186||5|A1|||0.0011|||||||||||||||||||||||1.540|-0.0244…	N	N	1.54	N	N	N
X	15316134	.	G	A	G	A	0.0005298	0.513692	0	0	0.00199402	0	0	0.00199402	N	N	N	N	N	N	N	N	N	N	N	N	N	CSQ=A|downstream_gene_variant|MODIFIER|PIGA|ENSG00000165195|Transcript|ENST00000333590.5|protein_coding||||||||||rs770416192|3317|-1||HGNC|HGNC:8957||1|P1|||0.0005|||||||||||||||||||||||0.344|-0.264096||,A|upstream_gene_variant|MODIFIER|ASB11|ENSG00000165192|Transcript|ENST00000344384.8|protein_coding||||||||||rs770416192|1575|-1||HGNC|HGNC:17186||5|A1|||0.0005|||||||||||||||||||||||0.344|-0.2640…	N	N	0.344	N	N	N
X	15316158	.	C	T	C	T	0.00096432	0.486308	N	N	N	N	N	0.00125	0.00414938	0	0	0	0	0	0	0	0	0	0	0.0206897	0	CSQ=T|downstream_gene_variant|MODIFIER|PIGA|ENSG00000165195|Transcript|ENST00000333590.5|protein_coding|||||||||||3293|-1||HGNC|HGNC:8957||1|P1||||||||||||||||||||||||||3.494|0.156314||,T|upstream_gene_variant|MODIFIER|ASB11|ENSG00000165192|Transcript|ENST00000344384.8|protein_coding|||||||||||1599|-1||HGNC|HGNC:17186||5|A1||||||||||||||||||||||||||3.494|0.156314|0.868|,T|upstream_gene_variant|MO…	N	N	3.494	N	N	N
X	15316204	rs144407577	G	C	G	C	0.0543986	0	0	0.00522193	0.0877368	0.00763359	0.00278552	0.0780395	0.0829875	0.0494186	0.117647	0.0555556	0.0330578	0.0487805	0.0613079	0.104478	0.0789474	0.00948767	0.16318	0.186207	0.113208	CSQ=C|downstream_gene_variant|MODIFIER|PIGA|ENSG00000165195|Transcript|ENST00000333590.5|protein_coding||||||||||rs144407577|3247|-1||HGNC|HGNC:8957||1|P1|||0.0260|0.0877|0.0076|0|0.0052|0.0028||||||||||||||||||2.974|0.115149||,C|upstream_gene_variant|MODIFIER|ASB11|ENSG00000165192|Transcript|ENST00000344384.8|protein_coding||||||||||rs144407577|1645|-1||HGNC|HGNC:17186||5|A1|||0.0260|0.0877|0.00…	N	N	2.974	N	N	N
X	15316219	.	A	G	A	G	0.00024108	0.486308	N	N	N	N	N	0.0003125	0	0	0	0	0	0	0	0	0	0	0.0041841	0	0	CSQ=G|downstream_gene_variant|MODIFIER|PIGA|ENSG00000165195|Transcript|ENST00000333590.5|protein_coding|||||||||||3232|-1||HGNC|HGNC:8957||1|P1||||||||||||||||||||||||||4.838|0.261313||,G|upstream_gene_variant|MODIFIER|ASB11|ENSG00000165192|Transcript|ENST00000344384.8|protein_coding|||||||||||1660|-1||HGNC|HGNC:17186||5|A1||||||||||||||||||||||||||4.838|0.261313|0.868|,G|upstream_gene_variant|MO…	N	N	4.838	N	N	N
X	15316253	.	A	C	A	C	0.0005298	0.513692	0	0	0.00199402	0	0	0.00199402	N	N	N	N	N	N	N	N	N	N	N	N	N	CSQ=C|downstream_gene_variant|MODIFIER|PIGA|ENSG00000165195|Transcript|ENST00000333590.5|protein_coding||||||||||rs763035352|3198|-1||HGNC|HGNC:8957||1|P1|||0.0005|||||||||||||||||||||||4.355|0.222684||,C|upstream_gene_variant|MODIFIER|ASB11|ENSG00000165192|Transcript|ENST00000344384.8|protein_coding||||||||||rs763035352|1694|-1||HGNC|HGNC:17186||5|A1|||0.0005|||||||||||||||||||||||4.355|0.222684…	N	N	4.355	N	N	N
X	15316265	.	G	T	G	T	0.0005298	0.513692	0	0	0.00199402	0	0	0.00199402	N	N	N	N	N	N	N	N	N	N	N	N	N	CSQ=T|downstream_gene_variant|MODIFIER|PIGA|ENSG00000165195|Transcript|ENST00000333590.5|protein_coding||||||||||rs768769734|3186|-1||HGNC|HGNC:8957||1|P1|||0.0005|||||||||||||||||||||||3.038|0.120304||,T|upstream_gene_variant|MODIFIER|ASB11|ENSG00000165192|Transcript|ENST00000344384.8|protein_coding||||||||||rs768769734|1706|-1||HGNC|HGNC:17186||5|A1|||0.0005|||||||||||||||||||||||3.038|0.120304…	N	N	3.038	N	N	N
X	15316300	.	A	C	A	C	0.00072324	0.486308	N	N	N	N	N	0.0009375	0	0.00290698	0	0	0	0	0	0	0	0.00189753	0	0	0.0188679	CSQ=C|downstream_gene_variant|MODIFIER|PIGA|ENSG00000165195|Transcript|ENST00000333590.5|protein_coding||||||||||rs1165914361|3151|-1||HGNC|HGNC:8957||1|P1||||||||||||||||||||||||||8.787|0.671143||,C|upstream_gene_variant|MODIFIER|ASB11|ENSG00000165192|Transcript|ENST00000344384.8|protein_coding||||||||||rs1165914361|1741|-1||HGNC|HGNC:17186||5|A1||||||||||||||||||||||||||8.787|0.671143|0.868|,C|…	N	N	8.787	N	N	N
X	15316301	.	G	A	G	A	0.00072324	0.486308	N	N	N	N	N	0.0009375	0	0.00290698	0	0	0	0	0	0	0	0.00189753	0	0	0.0188679	CSQ=A|downstream_gene_variant|MODIFIER|PIGA|ENSG00000165195|Transcript|ENST00000333590.5|protein_coding||||||||||rs1351223530|3150|-1||HGNC|HGNC:8957||1|P1||||||||||||||||||||||||||10.70|0.876376||,A|upstream_gene_variant|MODIFIER|ASB11|ENSG00000165192|Transcript|ENST00000344384.8|protein_coding||||||||||rs1351223530|1742|-1||HGNC|HGNC:17186||5|A1||||||||||||||||||||||||||10.70|0.876376|0.868|,A|…	N	N	10.7	N	N	N
X	15316320	.	T	C	T	C	0.00048216	0.486308	N	N	N	N	N	0.0003125	0	0	0	0	0	0	0	0	0	0	0	0	0.0188679	CSQ=C|downstream_gene_variant|MODIFIER|PIGA|ENSG00000165195|Transcript|ENST00000333590.5|protein_coding|||||||||||3131|-1||HGNC|HGNC:8957||1|P1||||||||||||||||||||||||||13.30|1.122053||,C|upstream_gene_variant|MODIFIER|ASB11|ENSG00000165192|Transcript|ENST00000344384.8|protein_coding|||||||||||1761|-1||HGNC|HGNC:17186||5|A1||||||||||||||||||||||||||13.30|1.122053|0.868|,C|upstream_gene_variant|MO…	N	N	13.3	N	N	N
X	15316321	.	T	C	T	C	0.00144648	0.486308	N	N	N	N	N	0.000625	0.00414938	0	0	0	0	0	0	0	0	0.00189753	0	0	0	CSQ=C|downstream_gene_variant|MODIFIER|PIGA|ENSG00000165195|Transcript|ENST00000333590.5|protein_coding||||||||||rs1364898324|3130|-1||HGNC|HGNC:8957||1|P1||||||||||||||||||||||||||13.23|1.113805||,C|upstream_gene_variant|MODIFIER|ASB11|ENSG00000165192|Transcript|ENST00000344384.8|protein_coding||||||||||rs1364898324|1762|-1||HGNC|HGNC:17186||5|A1||||||||||||||||||||||||||13.23|1.113805|0.868|,C|…	N	N	13.23	N	N	N
X	15316322	.	G	A	G	A	0.00144648	0.486308	N	N	N	N	N	0.000625	0.00414938	0	0	0	0	0	0	0	0	0.00189753	0	0	0	CSQ=A|downstream_gene_variant|MODIFIER|PIGA|ENSG00000165195|Transcript|ENST00000333590.5|protein_coding||||||||||rs1448819514|3129|-1||HGNC|HGNC:8957||1|P1||||||||||||||||||||||||||11.37|0.936914||,A|upstream_gene_variant|MODIFIER|ASB11|ENSG00000165192|Transcript|ENST00000344384.8|protein_coding||||||||||rs1448819514|1763|-1||HGNC|HGNC:17186||5|A1||||||||||||||||||||||||||11.37|0.936914|0.868|,A|…	N	N	11.37	N	N	N
X	15316331	.	T	A	T	A	0.00048216	0.486308	N	N	N	N	N	0.0003125	0	0	0	0	0	0	0	0	0	0	0	0	0.0188679	CSQ=A|downstream_gene_variant|MODIFIER|PIGA|ENSG00000165195|Transcript|ENST00000333590.5|protein_coding|||||||||||3120|-1||HGNC|HGNC:8957||1|P1||||||||||||||||||||||||||9.282|0.730222||,A|upstream_gene_variant|MODIFIER|ASB11|ENSG00000165192|Transcript|ENST00000344384.8|protein_coding|||||||||||1772|-1||HGNC|HGNC:17186||5|A1||||||||||||||||||||||||||9.282|0.730222|0.868|,A|upstream_gene_variant|MO…	N	N	9.282	N	N	N
X	15316338	.	C	T	C	T	0.0010596	0.513692	0	0	0.00398804	0	0	0.00398804	N	N	N	N	N	N	N	N	N	N	N	N	N	CSQ=T|downstream_gene_variant|MODIFIER|PIGA|ENSG00000165195|Transcript|ENST00000333590.5|protein_coding||||||||||rs774594896|3113|-1||HGNC|HGNC:8957||1|P1|||0.0011|||||||||||||||||||||||7.267|0.493213||,T|upstream_gene_variant|MODIFIER|ASB11|ENSG00000165192|Transcript|ENST00000344384.8|protein_coding||||||||||rs774594896|1779|-1||HGNC|HGNC:17186||5|A1|||0.0011|||||||||||||||||||||||7.267|0.493213…	N	N	7.267	N	N	N
X	15316339	.	G	A	G	A	0.00048216	0.486308	N	N	N	N	N	0.000625	0	0	0	0	0	0	0.0027248	0	0	0	0	0	0	CSQ=A|downstream_gene_variant|MODIFIER|PIGA|ENSG00000165195|Transcript|ENST00000333590.5|protein_coding||||||||||rs564940610|3112|-1||HGNC|HGNC:8957||1|P1||||||||||||||||||||||||||6.601|0.422425||,A|upstream_gene_variant|MODIFIER|ASB11|ENSG00000165192|Transcript|ENST00000344384.8|protein_coding||||||||||rs564940610|1780|-1||HGNC|HGNC:17186||5|A1||||||||||||||||||||||||||6.601|0.422425|0.868|,A|up…	N	N	6.601	N	N	N
X	15316347	.	C	T	C	T	0.00024108	0.486308	N	N	N	N	N	0	0	0	0	0	0	0	0	0	0	0	0	0	0	CSQ=T|downstream_gene_variant|MODIFIER|PIGA|ENSG00000165195|Transcript|ENST00000333590.5|protein_coding|||||||||||3104|-1||HGNC|HGNC:8957||1|P1||||||||||||||||||||||||||6.520|0.414148||,T|upstream_gene_variant|MODIFIER|ASB11|ENSG00000165192|Transcript|ENST00000344384.8|protein_coding|||||||||||1788|-1||HGNC|HGNC:17186||5|A1||||||||||||||||||||||||||6.520|0.414148|0.868|,T|upstream_gene_variant|MO…	N	N	6.52	N	N	N
X	15316348	.	A	G	A	G	0.00024108	0.486308	N	N	N	N	N	0	0	0	0	0	0	0	0	0	0	0	0	0	0	CSQ=G|downstream_gene_variant|MODIFIER|PIGA|ENSG00000165195|Transcript|ENST00000333590.5|protein_coding|||||||||||3103|-1||HGNC|HGNC:8957||1|P1||||||||||||||||||||||||||7.569|0.526975||,G|upstream_gene_variant|MODIFIER|ASB11|ENSG00000165192|Transcript|ENST00000344384.8|protein_coding|||||||||||1789|-1||HGNC|HGNC:17186||5|A1||||||||||||||||||||||||||7.569|0.526975|0.868|,G|upstream_gene_variant|MO…	N	N	7.569	N	N	N
X	15316354	.	CCGAGATCGCG	C	C	C	0.00192864	0.486308	N	N	N	N	N	0.0009375	0.00414938	0	0	0	0	0	0	0	0	0.00379507	0	0	0	CSQ=-|downstream_gene_variant|MODIFIER|PIGA|ENSG00000165195|Transcript|ENST00000333590.5|protein_coding||||||||||rs1322503960|3087|-1||HGNC|HGNC:8957||1|P1||||||||||||||||||||||||||2.573|0.081094||,-|upstream_gene_variant|MODIFIER|ASB11|ENSG00000165192|Transcript|ENST00000344384.8|protein_coding||||||||||rs1322503960|1796|-1||HGNC|HGNC:17186||5|A1||||||||||||||||||||||||||2.573|0.081094|0.868|,-|…	N	N	2.573	N	N	N
X	15316373	.	C	T	C	T	0.00168756	0.486308	N	N	N	N	N	0.001875	0.00414938	0	0	0	0.00826446	0	0.0013624	0.00426439	0	0	0.0041841	0	0	CSQ=T|downstream_gene_variant|MODIFIER|PIGA|ENSG00000165195|Transcript|ENST00000333590.5|protein_coding||||||||||rs1423976270|3078|-1||HGNC|HGNC:8957||1|P1||||||||||||||||||||||||||5.175|0.289323||,T|upstream_gene_variant|MODIFIER|ASB11|ENSG00000165192|Transcript|ENST00000344384.8|protein_coding||||||||||rs1423976270|1814|-1||HGNC|HGNC:17186||5|A1||||||||||||||||||||||||||5.175|0.289323|0.868|,T|…	N	N	5.175	N	N	N
X	15316375	.	C	A	C	A	0.00506268	0.486308	N	N	N	N	N	0.0053125	0.00414938	0.00581395	0.00653595	0	0	0	0.00408719	0	0	0	0	0.0689655	0	CSQ=A|downstream_gene_variant|MODIFIER|PIGA|ENSG00000165195|Transcript|ENST00000333590.5|protein_coding||||||||||rs1163644375|3076|-1||HGNC|HGNC:8957||1|P1||||||||||||||||||||||||||4.475|0.232102||,A|upstream_gene_variant|MODIFIER|ASB11|ENSG00000165192|Transcript|ENST00000344384.8|protein_coding||||||||||rs1163644375|1816|-1||HGNC|HGNC:17186||5|A1||||||||||||||||||||||||||4.475|0.232102|0.868|,A|…	N	N	4.475	N	N	N
X	15316385	.	T	C	T	C	0.0012054	0.486308	N	N	N	N	N	0.00125	0	0	0	0	0.00826446	0	0.0013624	0.00426439	0	0	0	0	0	CSQ=C|downstream_gene_variant|MODIFIER|PIGA|ENSG00000165195|Transcript|ENST00000333590.5|protein_coding||||||||||rs1347828846|3066|-1||HGNC|HGNC:8957||1|P1||||||||||||||||||||||||||6.434|0.405539||,C|upstream_gene_variant|MODIFIER|ASB11|ENSG00000165192|Transcript|ENST00000344384.8|protein_coding||||||||||rs1347828846|1826|-1||HGNC|HGNC:17186||5|A1||||||||||||||||||||||||||6.434|0.405539|0.868|,C|…	N	N	6.434	N	N	N
X	15316386	.	G	A	G	A	0.0012054	0.486308	N	N	N	N	N	0.00125	0	0	0	0	0.00826446	0	0.0013624	0.00426439	0	0	0	0	0	CSQ=A|downstream_gene_variant|MODIFIER|PIGA|ENSG00000165195|Transcript|ENST00000333590.5|protein_coding||||||||||rs1466722214|3065|-1||HGNC|HGNC:8957||1|P1||||||||||||||||||||||||||4.565|0.239261||,A|upstream_gene_variant|MODIFIER|ASB11|ENSG00000165192|Transcript|ENST00000344384.8|protein_coding||||||||||rs1466722214|1827|-1||HGNC|HGNC:17186||5|A1||||||||||||||||||||||||||4.565|0.239261|0.868|,A|…	N	N	4.565	N	N	N
X	15316388	.	C	A	C	A	0.0002649	0.513692	0	0	0	0	0.00139276	0	N	N	N	N	N	N	N	N	N	N	N	N	N	CSQ=A|downstream_gene_variant|MODIFIER|PIGA|ENSG00000165195|Transcript|ENST00000333590.5|protein_coding||||||||||rs761539521|3063|-1||HGNC|HGNC:8957||1|P1|||0.0003|||||||||||||||||||||||4.359|0.222984||,A|upstream_gene_variant|MODIFIER|ASB11|ENSG00000165192|Transcript|ENST00000344384.8|protein_coding||||||||||rs761539521|1829|-1||HGNC|HGNC:17186||5|A1|||0.0003|||||||||||||||||||||||4.359|0.222984…	N	N	4.359	N	N	N
X	15316390	.	AG	A	A	A	0.0012054	0.486308	N	N	N	N	N	0.00125	0	0	0	0	0.00826446	0	0.0013624	0.00426439	0	0	0	0	0	CSQ=-|downstream_gene_variant|MODIFIER|PIGA|ENSG00000165195|Transcript|ENST00000333590.5|protein_coding||||||||||rs1444501885|3060|-1||HGNC|HGNC:8957||1|P1||||||||||||||||||||||||||2.818|0.102153||,-|upstream_gene_variant|MODIFIER|ASB11|ENSG00000165192|Transcript|ENST00000344384.8|protein_coding||||||||||rs1444501885|1832|-1||HGNC|HGNC:17186||5|A1||||||||||||||||||||||||||2.818|0.102153|0.868|,-|…	N	N	2.818	N	N	N
X	15316407	.	C	CA	C	CA	0.172185	0.513692	0.307592	0.113577	0.108674	0.227099	0.139276	0.108674	N	N	N	N	N	N	N	N	N	N	N	N	N	CSQ=A|downstream_gene_variant|MODIFIER|PIGA|ENSG00000165195|Transcript|ENST00000333590.5|protein_coding||||||||||rs369200134|3043|-1||HGNC|HGNC:8957||1|P1||||||||||||||||||||||||||2.285|0.054699||,A|upstream_gene_variant|MODIFIER|ASB11|ENSG00000165192|Transcript|ENST00000344384.8|protein_coding||||||||||rs369200134|1848|-1||HGNC|HGNC:17186||5|A1||||||||||||||||||||||||||2.285|0.054699|0.868|,A|up…	N	N	2.285	N	N	N
X	15316430	.	ATTTACCCT	A	A	A	0.00072324	0.486308	N	N	N	N	N	0.000625	0.00414938	0	0	0	0	0	0	0	0	0	0.0041841	0	0	CSQ=-|downstream_gene_variant|MODIFIER|PIGA|ENSG00000165195|Transcript|ENST00000333590.5|protein_coding|||||||||||3013|-1||HGNC|HGNC:8957||1|P1||||||||||||||||||||||||||1.231|-0.064954||,-|upstream_gene_variant|MODIFIER|ASB11|ENSG00000165192|Transcript|ENST00000344384.8|protein_coding|||||||||||1872|-1||HGNC|HGNC:17186||5|A1||||||||||||||||||||||||||1.231|-0.064954|0.868|,-|upstream_gene_variant|…	N	N	1.231	N	N	N
X	15316432	rs187526901	T	G	T	G	0.0161589	0.513692	0	0	0.0578265	0.00572519	0	0.0578265	N	N	N	N	N	N	N	N	N	N	N	N	N	CSQ=G|downstream_gene_variant|MODIFIER|PIGA|ENSG00000165195|Transcript|ENST00000333590.5|protein_coding||||||||||rs187526901|3019|-1||HGNC|HGNC:8957||1|P1|||0.0162|0.0578|0.0057|0|0|0||||||||||||||||||4.451|0.230214||,G|upstream_gene_variant|MODIFIER|ASB11|ENSG00000165192|Transcript|ENST00000344384.8|protein_coding||||||||||rs187526901|1873|-1||HGNC|HGNC:17186||5|A1|||0.0162|0.0578|0.0057|0|0|0||…	N	N	4.451	N	N	N
X	15316472	rs371206927	C	T	T	T	0.0250723	0.486308	N	N	N	N	N	0.03125	0.0124481	0	0.0130719	0	0	0	0	0	0	0.180266	0	0	0	CSQ=T|downstream_gene_variant|MODIFIER|PIGA|ENSG00000165195|Transcript|ENST00000333590.5|protein_coding||||||||||rs371206927|2979|-1||HGNC|HGNC:8957||1|P1||||||||||||||||||||||||||2.486|0.073345||,T|upstream_gene_variant|MODIFIER|ASB11|ENSG00000165192|Transcript|ENST00000344384.8|protein_coding||||||||||rs371206927|1913|-1||HGNC|HGNC:17186||5|A1||||||||||||||||||||||||||2.486|0.073345|0.868|,T|up…	N	N	2.486	N	N	N
X	15316473	rs192340129	G	T	G	T	0.00050486	0	0.0026178	0	0	0	0	0.00047585	0	0	0	0	0	0	0	0.00426439	0	0	0	0	0	CSQ=T|downstream_gene_variant|MODIFIER|PIGA|ENSG00000165195|Transcript|ENST00000333590.5|protein_coding||||||||||rs192340129|2978|-1||HGNC|HGNC:8957||1|P1|||0.0005|0|0|0.0026|0|0||||||||||||||||||2.570|0.080835||,T|upstream_gene_variant|MODIFIER|ASB11|ENSG00000165192|Transcript|ENST00000344384.8|protein_coding||||||||||rs192340129|1914|-1||HGNC|HGNC:17186||5|A1|||0.0005|0|0|0.0026|0|0||||||||||||…	N	N	2.57	N	N	N
X	15316487	.	A	T	A	T	0.0012054	0.486308	N	N	N	N	N	0.0015625	0.00414938	0	0.0196078	0	0	0	0	0	0	0	0	0.00689655	0	CSQ=T|downstream_gene_variant|MODIFIER|PIGA|ENSG00000165195|Transcript|ENST00000333590.5|protein_coding|||||||||||2964|-1||HGNC|HGNC:8957||1|P1||||||||||||||||||||||||||3.923|0.189255||,T|upstream_gene_variant|MODIFIER|ASB11|ENSG00000165192|Transcript|ENST00000344384.8|protein_coding|||||||||||1928|-1||HGNC|HGNC:17186||5|A1||||||||||||||||||||||||||3.923|0.189255|0.868|,T|upstream_gene_variant|MO…	N	N	3.923	N	N	N
X	15316507	.	C	T	C	T	0.0002649	0.513692	0	0.00130548	0	0	0	0	N	N	N	N	N	N	N	N	N	N	N	N	N	CSQ=T|downstream_gene_variant|MODIFIER|PIGA|ENSG00000165195|Transcript|ENST00000333590.5|protein_coding||||||||||rs766245248|2944|-1||HGNC|HGNC:8957||1|P1|||0.0003|||||||||||||||||||||||0.760|-0.146065||,T|upstream_gene_variant|MODIFIER|ASB11|ENSG00000165192|Transcript|ENST00000344384.8|protein_coding||||||||||rs766245248|1948|-1||HGNC|HGNC:17186||5|A1|||0.0003|||||||||||||||||||||||0.760|-0.1460…	N	N	0.76	N	N	N
X	15316544	.	G	A	G	A	0.00265051	0	0.0013089	0	0.00099701	0.0019084	0.0111421	0.00237925	0	0	0	0.0185185	0	0	0.0013624	0	0.0263158	0	0	0	0.113208	CSQ=A|downstream_gene_variant|MODIFIER|PIGA|ENSG00000165195|Transcript|ENST00000333590.5|protein_coding||||||||||rs753292629|2907|-1||HGNC|HGNC:8957||1|P1|||0.0029|||||||||||||||||||||||0.507|-0.208802||,A|upstream_gene_variant|MODIFIER|ASB11|ENSG00000165192|Transcript|ENST00000344384.8|protein_coding||||||||||rs753292629|1985|-1||HGNC|HGNC:17186||5|A1|||0.0029|||||||||||||||||||||||0.507|-0.2088…	N	N	0.507	N	N	N
X	15316545	.	G	A	G	A	0.0002649	0.513692	0.0013089	0	0	0	0	0	N	N	N	N	N	N	N	N	N	N	N	N	N	CSQ=A|downstream_gene_variant|MODIFIER|PIGA|ENSG00000165195|Transcript|ENST00000333590.5|protein_coding||||||||||rs754468682|2906|-1||HGNC|HGNC:8957||1|P1|||0.0003|||||||||||||||||||||||0.602|-0.182822||,A|upstream_gene_variant|MODIFIER|ASB11|ENSG00000165192|Transcript|ENST00000344384.8|protein_coding||||||||||rs754468682|1986|-1||HGNC|HGNC:17186||5|A1|||0.0003|||||||||||||||||||||||0.602|-0.1828…	N	N	0.602	N	N	N
X	15316610	rs148608360	G	A	G	A	0.00555345	0	0	0.0300261	0.00199402	0.0171756	0.00139276	0.00261718	0	0	0	0	0	0	0.0108992	0	0	0	0.0041841	0	0	CSQ=A|downstream_gene_variant|MODIFIER|PIGA|ENSG00000165195|Transcript|ENST00000333590.5|protein_coding||||||||||rs148608360|2841|-1||HGNC|HGNC:8957||1|P1|||0.0093|0.002|0.0172|0|0.03|0.0014||||||||||||||||||2.487|0.073390||,A|upstream_gene_variant|MODIFIER|ASB11|ENSG00000165192|Transcript|ENST00000344384.8|protein_coding||||||||||rs148608360|2051|-1||HGNC|HGNC:17186||5|A1|||0.0093|0.002|0.0172|0…	N	N	2.487	N	N	N
X	15316624	rs184143372	G	A	G	A	0.00176701	0	0	0	0.00598205	0	0	0.00166548	0	0	0	0	0	0	0.0013624	0	0	0	0	0	0	CSQ=A|downstream_gene_variant|MODIFIER|PIGA|ENSG00000165195|Transcript|ENST00000333590.5|protein_coding||||||||||rs184143372|2827|-1||HGNC|HGNC:8957||1|P1|||0.0016|0.006|0|0|0|0||||||||||||||||||0.690|-0.161626||,A|upstream_gene_variant|MODIFIER|ASB11|ENSG00000165192|Transcript|ENST00000344384.8|protein_coding||||||||||rs184143372|2065|-1||HGNC|HGNC:17186||5|A1|||0.0016|0.006|0|0|0|0|||||||||||||…	N	N	0.69	N	N	N
X	15316632	.	G	A	G	A	0.00024108	0.486308	N	N	N	N	N	0.0003125	0	0	0	0	0	0	0.0013624	0	0	0	0	0	0	CSQ=A|downstream_gene_variant|MODIFIER|PIGA|ENSG00000165195|Transcript|ENST00000333590.5|protein_coding||||||||||rs1340662905|2819|-1||HGNC|HGNC:8957||1|P1||||||||||||||||||||||||||2.083|0.035043||,A|upstream_gene_variant|MODIFIER|ASB11|ENSG00000165192|Transcript|ENST00000344384.8|protein_coding||||||||||rs1340662905|2073|-1||HGNC|HGNC:17186||5|A1||||||||||||||||||||||||||2.083|0.035043|0.868|,A|…	N	N	2.083	N	N	N
X	15316663	rs144215885	C	T	C	T	0.00370861	0.513692	0.0170157	0	0	0	0.00139276	0	N	N	N	N	N	N	N	N	N	N	N	N	N	CSQ=T|downstream_gene_variant|MODIFIER|PIGA|ENSG00000165195|Transcript|ENST00000333590.5|protein_coding||||||||||rs144215885|2788|-1||HGNC|HGNC:8957||1|P1|||0.0037|0|0|0.017|0|0.0014||||||||||||||||||0.648|-0.171591||,T|upstream_gene_variant|MODIFIER|ASB11|ENSG00000165192|Transcript|ENST00000344384.8|protein_coding||||||||||rs144215885|2104|-1||HGNC|HGNC:17186||5|A1|||0.0037|0|0|0.017|0|0.0014|||…	N	N	0.648	N	N	N
X	15316683	rs147370458	C	G	C	G	0.0639909	0	0	0.00522193	0.115653	0.00954198	0.00278552	0.0901737	0.0871369	0.0668605	0.117647	0.0740741	0.0330578	0.0487805	0.0762943	0.110874	0.0789474	0.00948767	0.167364	0.186207	0.113208	CSQ=G|downstream_gene_variant|MODIFIER|PIGA|ENSG00000165195|Transcript|ENST00000333590.5|protein_coding||||||||||rs147370458|2768|-1||HGNC|HGNC:8957||1|P1|||0.0336|0.1157|0.0095|0|0.0052|0.0028||||||||||||||||||3.600|0.164477||,G|upstream_gene_variant|MODIFIER|ASB11|ENSG00000165192|Transcript|ENST00000344384.8|protein_coding||||||||||rs147370458|2124|-1||HGNC|HGNC:17186||5|A1|||0.0336|0.1157|0.00…	N	N	3.6	N	N	N
X	15316695	.	G	C	G	C	0.0002649	0.513692	0	0	0	0	0.00139276	0	N	N	N	N	N	N	N	N	N	N	N	N	N	CSQ=C|downstream_gene_variant|MODIFIER|PIGA|ENSG00000165195|Transcript|ENST00000333590.5|protein_coding||||||||||rs746217575|2756|-1||HGNC|HGNC:8957||1|P1|||0.0003|||||||||||||||||||||||0.591|-0.185796||,C|upstream_gene_variant|MODIFIER|ASB11|ENSG00000165192|Transcript|ENST00000344384.8|protein_coding||||||||||rs746217575|2136|-1||HGNC|HGNC:17186||5|A1|||0.0003|||||||||||||||||||||||0.591|-0.1857…	N	N	0.591	N	N	N
X	15316719	.	C	G	C	G	0.0002649	0.513692	0.0013089	0	0	0	0	0	N	N	N	N	N	N	N	N	N	N	N	N	N	CSQ=G|downstream_gene_variant|MODIFIER|PIGA|ENSG00000165195|Transcript|ENST00000333590.5|protein_coding||||||||||rs756706112|2732|-1||HGNC|HGNC:8957||1|P1|||0.0003|||||||||||||||||||||||1.940|0.020324||,G|upstream_gene_variant|MODIFIER|ASB11|ENSG00000165192|Transcript|ENST00000344384.8|protein_coding||||||||||rs756706112|2160|-1||HGNC|HGNC:17186||5|A1|||0.0003|||||||||||||||||||||||1.940|0.020324…	N	N	1.94	N	N	N
X	15316724	rs58369541	T	C	C	C	0.0788843	0	0	0.00522193	0.172483	0.0152672	0.0139276	0.112539	0.0912863	0.0784884	0.124183	0.0925926	0.0413223	0.0609756	0.0762943	0.113006	0.105263	0.0151803	0.238494	0.186207	0.226415	CSQ=C|downstream_gene_variant|MODIFIER|PIGA|ENSG00000165195|Transcript|ENST00000333590.5|protein_coding||||||||||rs58369541|2727|-1||HGNC|HGNC:8957||1|P1|||0.0517|0.1725|0.0153|0|0.0052|0.0139||||||||||||||||||1.353|-0.048213||,C|upstream_gene_variant|MODIFIER|ASB11|ENSG00000165192|Transcript|ENST00000344384.8|protein_coding||||||||||rs58369541|2165|-1||HGNC|HGNC:17186||5|A1|||0.0517|0.1725|0.015…	N	N	1.353	N	N	N
X	15316765	.	G	A	G	A	0.00144648	0.486308	N	N	N	N	N	0.001875	0	0	0	0	0	0	0.00817439	0	0	0	0	0	0	CSQ=A|downstream_gene_variant|MODIFIER|PIGA|ENSG00000165195|Transcript|ENST00000333590.5|protein_coding|||||||||||2686|-1||HGNC|HGNC:8957||1|P1||||||||||||||||||||||||||0.551|-0.196383||,A|upstream_gene_variant|MODIFIER|ASB11|ENSG00000165192|Transcript|ENST00000344384.8|protein_coding|||||||||||2206|-1||HGNC|HGNC:17186||5|A1||||||||||||||||||||||||||0.551|-0.196383|0.868|,A|upstream_gene_variant|…	N	N	0.551	N	N	N
X	15316771	.	G	A	G	A	0.0002649	0.513692	0	0	0.00099701	0	0	0.00099701	N	N	N	N	N	N	N	N	N	N	N	N	N	CSQ=A|downstream_gene_variant|MODIFIER|PIGA|ENSG00000165195|Transcript|ENST00000333590.5|protein_coding||||||||||rs749361449|2680|-1||HGNC|HGNC:8957||1|P1|||0.0003|||||||||||||||||||||||1.318|-0.052829||,A|upstream_gene_variant|MODIFIER|ASB11|ENSG00000165192|Transcript|ENST00000344384.8|protein_coding||||||||||rs749361449|2212|-1||HGNC|HGNC:17186||5|A1|||0.0003|||||||||||||||||||||||1.318|-0.0528…	N	N	1.318	N	N	N
X	15316817	.	AG	A	A	A	0.00216972	0.486308	N	N	N	N	N	0.0025	0	0	0	0.0185185	0	0.0609756	0.0027248	0	0	0	0	0	0	CSQ=-|downstream_gene_variant|MODIFIER|PIGA|ENSG00000165195|Transcript|ENST00000333590.5|protein_coding||||||||||rs1370496197|2633|-1||HGNC|HGNC:8957||1|P1||||||||||||||||||||||||||3.292|0.140577||,-|upstream_gene_variant|MODIFIER|ASB11|ENSG00000165192|Transcript|ENST00000344384.8|protein_coding||||||||||rs1370496197|2259|-1||HGNC|HGNC:17186||5|A1||||||||||||||||||||||||||3.292|0.140577|0.868|,-|…	N	N	3.292	N	N	N
X	15316850	.	G	A	G	A	0.00211921	0.513692	0	0	0	0	0.0111421	0	N	N	N	N	N	N	N	N	N	N	N	N	N	CSQ=A|downstream_gene_variant|MODIFIER|PIGA|ENSG00000165195|Transcript|ENST00000333590.5|protein_coding||||||||||rs768734882|2601|-1||HGNC|HGNC:8957||1|P1|||0.0021|||||||||||||||||||||||0.051|-0.504491||,A|upstream_gene_variant|MODIFIER|ASB11|ENSG00000165192|Transcript|ENST00000344384.8|protein_coding||||||||||rs768734882|2291|-1||HGNC|HGNC:17186||5|A1|||0.0021|||||||||||||||||||||||0.051|-0.5044…	N	N	0.051	N	N	N
X	15316892	.	C	T	C	T	0.0002649	0.513692	0.0013089	0	0	0	0	0	N	N	N	N	N	N	N	N	N	N	N	N	N	CSQ=T|downstream_gene_variant|MODIFIER|PIGA|ENSG00000165195|Transcript|ENST00000333590.5|protein_coding||||||||||rs774273600|2559|-1||HGNC|HGNC:8957||1|P1|||0.0003|||||||||||||||||||||||1.632|-0.013569||,T|upstream_gene_variant|MODIFIER|ASB11|ENSG00000165192|Transcript|ENST00000344384.8|protein_coding||||||||||rs774273600|2333|-1||HGNC|HGNC:17186||5|A1|||0.0003|||||||||||||||||||||||1.632|-0.0135…	N	N	1.632	N	N	N
X	15316938	.	C	G	C	G	0.00337512	0.486308	N	N	N	N	N	0.004375	0	0	0	0	0	0	0.0163488	0	0.0263158	0	0	0.00689655	0	CSQ=G|downstream_gene_variant|MODIFIER|PIGA|ENSG00000165195|Transcript|ENST00000333590.5|protein_coding||||||||||rs973453169|2513|-1||HGNC|HGNC:8957||1|P1||||||||||||||||||||||||||1.056|-0.091507||,G|upstream_gene_variant|MODIFIER|ASB11|ENSG00000165192|Transcript|ENST00000344384.8|protein_coding||||||||||rs973453169|2379|-1||HGNC|HGNC:17186||5|A1||||||||||||||||||||||||||1.056|-0.091507|0.868|,G|…	N	N	1.056	N	N	N
X	15316964	rs192208429	C	T	C	T	0.0002649	0.513692	0	0.00130548	0	0	0	0	N	N	N	N	N	N	N	N	N	N	N	N	N	CSQ=T|downstream_gene_variant|MODIFIER|PIGA|ENSG00000165195|Transcript|ENST00000333590.5|protein_coding||||||||||rs192208429|2487|-1||HGNC|HGNC:8957||1|P1|||0.0003|0|0|0|0.0013|0||||||||||||||||||1.774|0.002574||,T|upstream_gene_variant|MODIFIER|ASB11|ENSG00000165192|Transcript|ENST00000344384.8|protein_coding||||||||||rs192208429|2405|-1||HGNC|HGNC:17186||5|A1|||0.0003|0|0|0|0.0013|0||||||||||||…	N	N	1.774	N	N	N
X	15317040	.	T	C	T	C	0.0048216	0.486308	N	N	N	N	N	0.005	0.00414938	0.00581395	0.00653595	0	0	0	0.0013624	0	0	0.00189753	0	0.0689655	0	CSQ=C|downstream_gene_variant|MODIFIER|PIGA|ENSG00000165195|Transcript|ENST00000333590.5|protein_coding||||||||||rs950978996|2411|-1||HGNC|HGNC:8957||1|P1||||||||||||||||||||||||||0.935|-0.112097||,C|upstream_gene_variant|MODIFIER|ASB11|ENSG00000165192|Transcript|ENST00000344384.8|protein_coding||||||||||rs950978996|2481|-1||HGNC|HGNC:17186||5|A1||||||||||||||||||||||||||0.935|-0.112097|0.868|,C|…	N	N	0.935	N	N	N
X	15317047	rs5935946	A	T	A	T	0.274139	0	0.420157	0.389034	0.139581	0.284351	0.623955	0.177254	0.236515	0.142442	0.169935	0.203704	0.31405	0.170732	0.257493	0.0362473	0.236842	0.197343	0.179916	0.262069	0.188679	CSQ=T|downstream_gene_variant|MODIFIER|PIGA|ENSG00000165195|Transcript|ENST00000333590.5|protein_coding||||||||||rs5935946|2404|-1||HGNC|HGNC:8957||1|P1|||0.3592|0.1396|0.2844|0.4202|0.389|0.624||||||||||||||||||2.015|0.028086||,T|upstream_gene_variant|MODIFIER|ASB11|ENSG00000165192|Transcript|ENST00000344384.8|protein_coding||||||||||rs5935946|2488|-1||HGNC|HGNC:17186||5|A1|||0.3592|0.1396|0.284…	N	N	2.015	N	N	N
X	15317048	.	C	A	C	A	0.0002649	0.513692	0.0013089	0	0	0	0	0	N	N	N	N	N	N	N	N	N	N	N	N	N	CSQ=A|downstream_gene_variant|MODIFIER|PIGA|ENSG00000165195|Transcript|ENST00000333590.5|protein_coding||||||||||rs773049573|2403|-1||HGNC|HGNC:8957||1|P1|||0.0003|||||||||||||||||||||||1.158|-0.075675||,A|upstream_gene_variant|MODIFIER|ASB11|ENSG00000165192|Transcript|ENST00000344384.8|protein_coding||||||||||rs773049573|2489|-1||HGNC|HGNC:17186||5|A1|||0.0003|||||||||||||||||||||||1.158|-0.0756…	N	N	1.158	N	N	N
X	15317062	.	G	A	G	A	0.00024108	0.486308	N	N	N	N	N	0	0	0	0	0	0	0	0	0	0	0	0	0	0	CSQ=A|downstream_gene_variant|MODIFIER|PIGA|ENSG00000165195|Transcript|ENST00000333590.5|protein_coding|||||||||||2389|-1||HGNC|HGNC:8957||1|P1||||||||||||||||||||||||||0.568|-0.191719||,A|upstream_gene_variant|MODIFIER|ASB11|ENSG00000165192|Transcript|ENST00000344384.8|protein_coding|||||||||||2503|-1||HGNC|HGNC:17186||5|A1||||||||||||||||||||||||||0.568|-0.191719|0.868|,A|upstream_gene_variant|…	N	N	0.568	N	N	N
X	15317127	.	T	C	T	C	0.0007947	0.513692	0	0	0.00299103	0	0	0.00299103	N	N	N	N	N	N	N	N	N	N	N	N	N	CSQ=C|downstream_gene_variant|MODIFIER|PIGA|ENSG00000165195|Transcript|ENST00000333590.5|protein_coding||||||||||rs760394356|2324|-1||HGNC|HGNC:8957||1|P1|||0.0008|||||||||||||||||||||||1.527|-0.026083||,C|upstream_gene_variant|MODIFIER|ASB11|ENSG00000165192|Transcript|ENST00000344384.8|protein_coding||||||||||rs760394356|2568|-1||HGNC|HGNC:17186||5|A1|||0.0008|||||||||||||||||||||||1.527|-0.0260…	N	N	1.527	N	N	N
X	15317160	rs184534591	G	A	G	A	0.0002649	0.513692	0	0.00130548	0	0	0	0	N	N	N	N	N	N	N	N	N	N	N	N	N	CSQ=A|downstream_gene_variant|MODIFIER|PIGA|ENSG00000165195|Transcript|ENST00000333590.5|protein_coding||||||||||rs184534591|2291|-1||HGNC|HGNC:8957||1|P1|||0.0003|0|0|0|0.0013|0||||||||||||||||||5.268|0.297301||,A|upstream_gene_variant|MODIFIER|ASB11|ENSG00000165192|Transcript|ENST00000344384.8|protein_coding||||||||||rs184534591|2601|-1||HGNC|HGNC:17186||5|A1|||0.0003|0|0|0|0.0013|0||||||||||||…	N	N	5.268	N	N	N
X	15317180	.	T	C	T	C	0.00048216	0.486308	N	N	N	N	N	0.000625	0	0.00581395	0	0	0	0	0	0	0	0	0	0	0	CSQ=C|downstream_gene_variant|MODIFIER|PIGA|ENSG00000165195|Transcript|ENST00000333590.5|protein_coding||||||||||rs937653850|2271|-1||HGNC|HGNC:8957||1|P1||||||||||||||||||||||||||1.979|0.024455||,C|upstream_gene_variant|MODIFIER|ASB11|ENSG00000165192|Transcript|ENST00000344384.8|protein_coding||||||||||rs937653850|2621|-1||HGNC|HGNC:17186||5|A1||||||||||||||||||||||||||1.979|0.024455|0.868|,C|up…	N	N	1.979	N	N	N
X	15317211	.	T	C	T	C	0.0002649	0.513692	0	0	0	0.0019084	0	0	N	N	N	N	N	N	N	N	N	N	N	N	N	CSQ=C|downstream_gene_variant|MODIFIER|PIGA|ENSG00000165195|Transcript|ENST00000333590.5|protein_coding||||||||||rs776580239|2240|-1||HGNC|HGNC:8957||1|P1|||0.0003|||||||||||||||||||||||1.373|-0.045509||,C|upstream_gene_variant|MODIFIER|ASB11|ENSG00000165192|Transcript|ENST00000344384.8|protein_coding||||||||||rs776580239|2652|-1||HGNC|HGNC:17186||5|A1|||0.0003|||||||||||||||||||||||1.373|-0.0455…	N	N	1.373	N	N	N
X	15317218	rs113052945	G	A	G	A	0.0103664	0.486308	N	N	N	N	N	0.0109375	0	0	0	0.0185185	0.264463	0.0121951	0.0013624	0	0	0	0	0	0	CSQ=A|downstream_gene_variant|MODIFIER|PIGA|ENSG00000165195|Transcript|ENST00000333590.5|protein_coding||||||||||rs113052945|2233|-1||HGNC|HGNC:8957||1|P1||||||||||||||||||||||||||0.082|-0.447521||,A|upstream_gene_variant|MODIFIER|ASB11|ENSG00000165192|Transcript|ENST00000344384.8|protein_coding||||||||||rs113052945|2659|-1||HGNC|HGNC:17186||5|A1||||||||||||||||||||||||||0.082|-0.447521|0.868|,A|…	N	N	0.082	N	N	N
X	15317232	.	T	C	T	C	0.00164079	0	0	0	0	0	0.00278552	0.00237925	0	0	0	0	0	0	0.013624	0	0	0	0	0	0	CSQ=C|downstream_gene_variant|MODIFIER|PIGA|ENSG00000165195|Transcript|ENST00000333590.5|protein_coding||||||||||rs543524602|2219|-1||HGNC|HGNC:8957||1|P1|||0.0005|||||||||||||||||||||||6.135|0.376117||,C|upstream_gene_variant|MODIFIER|ASB11|ENSG00000165192|Transcript|ENST00000344384.8|protein_coding||||||||||rs543524602|2673|-1||HGNC|HGNC:17186||5|A1|||0.0005|||||||||||||||||||||||6.135|0.376117…	N	N	6.135	N	N	N
X	15317275	rs190223881	G	A	G	A	0.0002649	0.513692	0	0	0.00099701	0	0	0.00099701	N	N	N	N	N	N	N	N	N	N	N	N	N	CSQ=A|downstream_gene_variant|MODIFIER|PIGA|ENSG00000165195|Transcript|ENST00000333590.5|protein_coding||||||||||rs190223881|2176|-1||HGNC|HGNC:8957||1|P1|||0.0003|0.001|0|0|0|0||||||||||||||||||1.537|-0.024901||,A|upstream_gene_variant|MODIFIER|ASB11|ENSG00000165192|Transcript|ENST00000344384.8|protein_coding||||||||||rs190223881|2716|-1||HGNC|HGNC:17186||5|A1|||0.0003|0.001|0|0|0|0|||||||||||||…	N	N	1.537	N	N	N
X	15317358	.	C	T	C	T	0.00024108	0.486308	N	N	N	N	N	0.0003125	0.00414938	0	0	0	0	0	0	0	0	0	0	0	0	CSQ=T|downstream_gene_variant|MODIFIER|PIGA|ENSG00000165195|Transcript|ENST00000333590.5|protein_coding||||||||||rs1449046431|2093|-1||HGNC|HGNC:8957||1|P1||||||||||||||||||||||||||2.418|0.067133||,T|upstream_gene_variant|MODIFIER|ASB11|ENSG00000165192|Transcript|ENST00000344384.8|protein_coding||||||||||rs1449046431|2799|-1||HGNC|HGNC:17186||5|A1||||||||||||||||||||||||||2.418|0.067133|0.868|,T|…	N	N	2.418	N	N	N
X	15317370	.	C	G	C	G	0.00024108	0.486308	N	N	N	N	N	0	0	0	0	0	0	0	0	0	0	0	0	0	0	CSQ=G|downstream_gene_variant|MODIFIER|PIGA|ENSG00000165195|Transcript|ENST00000333590.5|protein_coding||||||||||rs991876283|2081|-1||HGNC|HGNC:8957||1|P1||||||||||||||||||||||||||1.065|-0.090058||,G|upstream_gene_variant|MODIFIER|ASB11|ENSG00000165192|Transcript|ENST00000344384.8|protein_coding||||||||||rs991876283|2811|-1||HGNC|HGNC:17186||5|A1||||||||||||||||||||||||||1.065|-0.090058|0.868|,G|…	N	N	1.065	N	N	N
X	15317382	.	T	C	T	C	0.00024108	0.486308	N	N	N	N	N	0.0003125	0	0	0.00653595	0	0	0	0	0	0	0	0	0	0	CSQ=C|downstream_gene_variant|MODIFIER|PIGA|ENSG00000165195|Transcript|ENST00000333590.5|protein_coding|||||||||||2069|-1||HGNC|HGNC:8957||1|P1||||||||||||||||||||||||||1.118|-0.081785||,C|upstream_gene_variant|MODIFIER|ASB11|ENSG00000165192|Transcript|ENST00000344384.8|protein_coding|||||||||||2823|-1||HGNC|HGNC:17186||5|A1||||||||||||||||||||||||||1.118|-0.081785|0.868|,C|upstream_gene_variant|…	N	N	1.118	N	N	N
X	15317420	.	T	G	T	G	0.0005298	0.513692	0	0	0	0	0.00278552	0	N	N	N	N	N	N	N	N	N	N	N	N	N	CSQ=G|downstream_gene_variant|MODIFIER|PIGA|ENSG00000165195|Transcript|ENST00000333590.5|protein_coding||||||||||rs752141937|2031|-1||HGNC|HGNC:8957||1|P1|||0.0005|||||||||||||||||||||||1.741|-0.001180||,G|upstream_gene_variant|MODIFIER|ASB11|ENSG00000165192|Transcript|ENST00000344384.8|protein_coding||||||||||rs752141937|2861|-1||HGNC|HGNC:17186||5|A1|||0.0005|||||||||||||||||||||||1.741|-0.0011…	N	N	1.741	N	N	N
X	15317441	.	A	G	A	G	0.00024108	0.486308	N	N	N	N	N	0	0	0	0	0	0	0	0	0	0	0	0	0	0	CSQ=G|downstream_gene_variant|MODIFIER|PIGA|ENSG00000165195|Transcript|ENST00000333590.5|protein_coding|||||||||||2010|-1||HGNC|HGNC:8957||1|P1||||||||||||||||||||||||||0.363|-0.256680||,G|upstream_gene_variant|MODIFIER|ASB11|ENSG00000165192|Transcript|ENST00000344384.8|protein_coding|||||||||||2882|-1||HGNC|HGNC:17186||5|A1||||||||||||||||||||||||||0.363|-0.256680|0.868|,G|upstream_gene_variant|…	N	N	0.363	N	N	N
X	15317473	rs147612155	G	A	G	A	0.0343304	0	0	0.00522193	0.0687936	0.00572519	0.00278552	0.0461575	0.033195	0.0261628	0.0849673	0.0185185	0.0165289	0.0487805	0.0299727	0.0234542	0.0263158	0.00759013	0.16318	0.062069	0.0377359	CSQ=A|downstream_gene_variant|MODIFIER|PIGA|ENSG00000165195|Transcript|ENST00000333590.5|protein_coding||||||||||rs147612155|1978|-1||HGNC|HGNC:8957||1|P1|||0.0207|0.0688|0.0057|0|0.0052|0.0028||||||||||||||||||2.275|0.053796||,A|upstream_gene_variant|MODIFIER|ASB11|ENSG00000165192|Transcript|ENST00000344384.8|protein_coding||||||||||rs147612155|2914|-1||HGNC|HGNC:17186||5|A1|||0.0207|0.0688|0.00…	N	N	2.275	N	N	N
X	15317528	.	TTA	T	T	T	0.00024108	0.486308	N	N	N	N	N	0.0003125	0	0	0	0	0	0	0.0013624	0	0	0	0	0	0	CSQ=-|downstream_gene_variant|MODIFIER|PIGA|ENSG00000165195|Transcript|ENST00000333590.5|protein_coding|||||||||||1921|-1||HGNC|HGNC:8957||1|P1|||||||||||||||||||||||||||||,-|upstream_gene_variant|MODIFIER|ASB11|ENSG00000165192|Transcript|ENST00000344384.8|protein_coding|||||||||||2970|-1||HGNC|HGNC:17186||5|A1||||||||||||||||||||||||||||0.868|,-|upstream_gene_variant|MODIFIER|ASB11|ENSG000001651…	N	N	N	N	N	N
X	15317577	rs182397576	G	T	G	T	0.0002649	0.513692	0	0.00130548	0	0	0	0	N	N	N	N	N	N	N	N	N	N	N	N	N	CSQ=T|downstream_gene_variant|MODIFIER|PIGA|ENSG00000165195|Transcript|ENST00000333590.5|protein_coding||||||||||rs182397576|1874|-1||HGNC|HGNC:8957||1|P1|||0.0003|0|0|0|0.0013|0||||||||||||||||||7.094|0.474308||,T|upstream_gene_variant|MODIFIER|ASB11|ENSG00000165192|Transcript|ENST00000344384.8|protein_coding||||||||||rs182397576|3018|-1||HGNC|HGNC:17186||5|A1|||0.0003|0|0|0|0.0013|0||||||||||||…	N	N	7.094	N	N	N
X	15317677	rs140854498	C	A	C	A	0.00423841	0.513692	0.0209424	0	0	0	0	0	N	N	N	N	N	N	N	N	N	N	N	N	N	CSQ=A|downstream_gene_variant|MODIFIER|PIGA|ENSG00000165195|Transcript|ENST00000333590.5|protein_coding||||||||||rs140854498|1774|-1||HGNC|HGNC:8957||1|P1|||0.0042|0|0|0.0209|0|0||||||||||||||||||1.129|-0.080008||,A|upstream_gene_variant|MODIFIER|ASB11|ENSG00000165192|Transcript|ENST00000344384.8|protein_coding||||||||||rs140854498|3118|-1||HGNC|HGNC:17186||5|A1|||0.0042|0|0|0.0209|0|0|||||||||||…	N	N	1.129	N	N	N
X	15317727	.	TGA	T	T	T	0.00144648	0.486308	N	N	N	N	N	0.0015625	0	0.0145349	0	0	0	0	0	0	0	0	0	0	0	CSQ=-|downstream_gene_variant|MODIFIER|PIGA|ENSG00000165195|Transcript|ENST00000333590.5|protein_coding||||||||||rs1450538464|1722|-1||HGNC|HGNC:8957||1|P1||||||||||||||||||||||||||9.614|0.767144||,-|upstream_gene_variant|MODIFIER|ASB11|ENSG00000165192|Transcript|ENST00000344384.8|protein_coding||||||||||rs1450538464|3169|-1||HGNC|HGNC:17186||5|A1||||||||||||||||||||||||||9.614|0.767144|0.868|,-|…	N	N	9.614	N	N	N
X	15317765	.	C	T	C	T	0.00048333	0.487279	N	N	N	N	N	0.00062617	0	0	0	0	0	0	0	0	0	0	0.00851064	0	0	CSQ=T|downstream_gene_variant|MODIFIER|PIGA|ENSG00000165195|Transcript|ENST00000333590.5|protein_coding||||||||||rs1390362570|1686|-1||HGNC|HGNC:8957||1|P1||||||||||||||||||||||||||0.388|-0.247361||,T|upstream_gene_variant|MODIFIER|ASB11|ENSG00000165192|Transcript|ENST00000344384.8|protein_coding||||||||||rs1390362570|3206|-1||HGNC|HGNC:17186||5|A1||||||||||||||||||||||||||0.388|-0.247361|0.868|,…	N	N	0.388	N	N	N
X	15317790	.	T	C	T	C	0.00072324	0.486308	N	N	N	N	N	0.0009375	0	0	0	0.0185185	0	0	0.0027248	0	0	0	0	0	0	CSQ=C|downstream_gene_variant|MODIFIER|PIGA|ENSG00000165195|Transcript|ENST00000333590.5|protein_coding|||||||||||1661|-1||HGNC|HGNC:8957||1|P1||||||||||||||||||||||||||5.600|0.326422||,C|upstream_gene_variant|MODIFIER|ASB11|ENSG00000165192|Transcript|ENST00000344384.8|protein_coding|||||||||||3231|-1||HGNC|HGNC:17186||5|A1||||||||||||||||||||||||||5.600|0.326422|0.868|,C|upstream_gene_variant|MO…	N	N	5.6	N	N	N
X	15317806	.	A	G	A	G	0.0005298	0.513692	0.0026178	0	0	0	0	0	N	N	N	N	N	N	N	N	N	N	N	N	N	CSQ=G|downstream_gene_variant|MODIFIER|PIGA|ENSG00000165195|Transcript|ENST00000333590.5|protein_coding||||||||||rs756511971|1645|-1||HGNC|HGNC:8957||1|P1|||0.0005|||||||||||||||||||||||0.998|-0.101195||,G|upstream_gene_variant|MODIFIER|ASB11|ENSG00000165192|Transcript|ENST00000344384.8|protein_coding||||||||||rs756511971|3247|-1||HGNC|HGNC:17186||5|A1|||0.0005|||||||||||||||||||||||0.998|-0.1011…	N	N	0.998	N	N	N
X	15317811	.	C	G	C	G	0.00048216	0.486308	N	N	N	N	N	0	0	0	0	0	0	0	0	0	0	0	0	0	0	CSQ=G|downstream_gene_variant|MODIFIER|PIGA|ENSG00000165195|Transcript|ENST00000333590.5|protein_coding|||||||||||1640|-1||HGNC|HGNC:8957||1|P1||||||||||||||||||||||||||0.464|-0.221837||,G|upstream_gene_variant|MODIFIER|ASB11|ENSG00000165192|Transcript|ENST00000344384.8|protein_coding|||||||||||3252|-1||HGNC|HGNC:17186||5|A1||||||||||||||||||||||||||0.464|-0.221837|0.868|,G|upstream_gene_variant|…	N	N	0.464	N	N	N
X	15317828	rs187397524	C	T	C	T	0.00214565	0	0	0.00130548	0.00398804	0	0	0.00333095	0	0.0145349	0	0	0	0.0121951	0	0.00426439	0	0.00189753	0	0.00689655	0	CSQ=T|downstream_gene_variant|MODIFIER|PIGA|ENSG00000165195|Transcript|ENST00000333590.5|protein_coding||||||||||rs187397524|1623|-1||HGNC|HGNC:8957||1|P1|||0.0013|0.004|0|0|0.0013|0||||||||||||||||||2.624|0.085558||,T|upstream_gene_variant|MODIFIER|ASB11|ENSG00000165192|Transcript|ENST00000344384.8|protein_coding||||||||||rs187397524|3269|-1||HGNC|HGNC:17186||5|A1|||0.0013|0.004|0|0|0.0013|0||||…	N	N	2.624	N	N	N
X	15317836	.	G	A	G	A	0.0007947	0.513692	0	0.00391645	0	0	0	0	N	N	N	N	N	N	N	N	N	N	N	N	N	CSQ=A|downstream_gene_variant|MODIFIER|PIGA|ENSG00000165195|Transcript|ENST00000333590.5|protein_coding||||||||||rs749858465|1615|-1||HGNC|HGNC:8957||1|P1|||0.0008|||||||||||||||||||||||3.899|0.187446||,A|upstream_gene_variant|MODIFIER|ASB11|ENSG00000165192|Transcript|ENST00000344384.8|protein_coding||||||||||rs749858465|3277|-1||HGNC|HGNC:17186||5|A1|||0.0008|||||||||||||||||||||||3.899|0.187446…	N	N	3.899	N	N	N
X	15317844	rs188892930	G	A	G	A	0.0153982	0	0.0013089	0	0.0448654	0.0019084	0	0.0195099	0.00829876	0.0261628	0.0326797	0	0.00826446	0	0.0013624	0.0277186	0	0	0.0209205	0.00689655	0	CSQ=A|downstream_gene_variant|MODIFIER|PIGA|ENSG00000165195|Transcript|ENST00000333590.5|protein_coding||||||||||rs188892930|1607|-1||HGNC|HGNC:8957||1|P1|||0.0125|0.0449|0.0019|0.0013|0|0||||||||||||||||||0.136|-0.383596||,A|upstream_gene_variant|MODIFIER|ASB11|ENSG00000165192|Transcript|ENST00000344384.8|protein_coding||||||||||rs188892930|3285|-1||HGNC|HGNC:17186||5|A1|||0.0125|0.0449|0.0019|0…	N	N	0.136	N	N	N
X	15317868	rs376124654	A	G	A	G	0.00265188	0.486308	N	N	N	N	N	0.0034375	0.0165975	0	0	0	0	0	0.00817439	0	0.0263158	0	0	0	0	CSQ=G|downstream_gene_variant|MODIFIER|PIGA|ENSG00000165195|Transcript|ENST00000333590.5|protein_coding||||||||||rs376124654|1583|-1||HGNC|HGNC:8957||1|P1||||||||||||||||||||||||||7.896|0.564677||,G|upstream_gene_variant|MODIFIER|ASB11|ENSG00000165192|Transcript|ENST00000344384.8|protein_coding||||||||||rs376124654|3309|-1||HGNC|HGNC:17186||5|A1||||||||||||||||||||||||||7.896|0.564677|0.868|,G|up…	N	N	7.896	N	N	N
X	15317879	rs5934234	A	C	A	A	0.447432	0	0.566754	0.52611	0.490528	0.639313	0.24234	0.422079	0.46888	0.392442	0.385621	0.555556	0.123967	0.268293	0.553134	0.206823	0.421053	0.356736	0.460251	0.434483	0.528302	CSQ=C|downstream_gene_variant|MODIFIER|PIGA|ENSG00000165195|Transcript|ENST00000333590.5|protein_coding||||||||||rs5934234|1572|-1||HGNC|HGNC:8957||1|P1|||0.5134|0.5095|0.3607|0.4332|0.4739|0.7577||||||||||||||||||7.106|0.475622||,C|upstream_gene_variant|MODIFIER|ASB11|ENSG00000165192|Transcript|ENST00000344384.8|protein_coding||||||||||rs5934234|3320|-1||HGNC|HGNC:17186||5|A1|||0.5134|0.5095|0.3…	N	N	7.106	N	N	N
X	15317890	.	T	A	C	A	0.0005298	0.513692	0.0026178	0	0	0	0	0	N	N	N	N	N	N	N	N	N	N	N	N	N	CSQ=A|downstream_gene_variant|MODIFIER|PIGA|ENSG00000165195|Transcript|ENST00000333590.5|protein_coding||||||||||rs748213467|1561|-1||HGNC|HGNC:8957||1|P1|||0.0005|||||||||||||||||||||||3.732|0.174618||,A|upstream_gene_variant|MODIFIER|ASB11|ENSG00000165192|Transcript|ENST00000344384.8|protein_coding||||||||||rs748213467|3331|-1||HGNC|HGNC:17186||5|A1|||0.0005|||||||||||||||||||||||3.732|0.174618…	N	N	3.732	N	N	N
X	15317891	.	C	T	C	T	0.00037864	0	0.0026178	0	0	0	0	0.00023793	0	0	0	0	0	0	0.0013624	0	0	0	0	0	0	CSQ=T|downstream_gene_variant|MODIFIER|PIGA|ENSG00000165195|Transcript|ENST00000333590.5|protein_coding||||||||||rs772295481|1560|-1||HGNC|HGNC:8957||1|P1|||0.0005|||||||||||||||||||||||0.595|-0.184680||,T|upstream_gene_variant|MODIFIER|ASB11|ENSG00000165192|Transcript|ENST00000344384.8|protein_coding||||||||||rs772295481|3332|-1||HGNC|HGNC:17186||5|A1|||0.0005|||||||||||||||||||||||0.595|-0.1846…	N	N	0.595	N	N	N
X	15317899	.	C	T	T	T	0.0005298	0.513692	0.0013089	0	0	0	0.00139276	0	N	N	N	N	N	N	N	N	N	N	N	N	N	CSQ=T|downstream_gene_variant|MODIFIER|PIGA|ENSG00000165195|Transcript|ENST00000333590.5|protein_coding||||||||||rs773383067|1552|-1||HGNC|HGNC:8957||1|P1|||0.0005|||||||||||||||||||||||0.046|-0.518318||,T|upstream_gene_variant|MODIFIER|ASB11|ENSG00000165192|Transcript|ENST00000344384.8|protein_coding||||||||||rs773383067|3340|-1||HGNC|HGNC:17186||5|A1|||0.0005|||||||||||||||||||||||0.046|-0.5183…	N	N	0.046	N	N	N
X	15317900	.	G	A	G	A	0.0007947	0.513692	0	0.00130548	0	0.00381679	0	0	N	N	N	N	N	N	N	N	N	N	N	N	N	CSQ=A|downstream_gene_variant|MODIFIER|PIGA|ENSG00000165195|Transcript|ENST00000333590.5|protein_coding||||||||||rs746827346|1551|-1||HGNC|HGNC:8957||1|P1|||0.0008|||||||||||||||||||||||2.432|0.068362||,A|upstream_gene_variant|MODIFIER|ASB11|ENSG00000165192|Transcript|ENST00000344384.8|protein_coding||||||||||rs746827346|3341|-1||HGNC|HGNC:17186||5|A1|||0.0008|||||||||||||||||||||||2.432|0.068362…	N	N	2.432	N	N	N
X	15317903	rs181656230	C	T	C	T	0.0015894	0.513692	0.0026178	0.00391645	0	0	0.00139276	0	N	N	N	N	N	N	N	N	N	N	N	N	N	CSQ=T|downstream_gene_variant|MODIFIER|PIGA|ENSG00000165195|Transcript|ENST00000333590.5|protein_coding||||||||||rs181656230|1548|-1||HGNC|HGNC:8957||1|P1|||0.0016|0|0|0.0026|0.0039|0.0014||||||||||||||||||3.500|0.156766||,T|upstream_gene_variant|MODIFIER|ASB11|ENSG00000165192|Transcript|ENST00000344384.8|protein_coding||||||||||rs181656230|3344|-1||HGNC|HGNC:17186||5|A1|||0.0016|0|0|0.0026|0.003…	N	N	3.5	N	N	N
X	15317904	rs5935947	A	G	A	A	0.367033	0	0.564136	0.515666	0.317049	0.622137	0.228412	0.308589	0.373444	0.313953	0.261438	0.462963	0.0826446	0.207317	0.474114	0.0938166	0.315789	0.341556	0.221757	0.248276	0.301887	CSQ=G|downstream_gene_variant|MODIFIER|PIGA|ENSG00000165195|Transcript|ENST00000333590.5|protein_coding||||||||||rs5935947|1547|-1||HGNC|HGNC:8957||1|P1|||0.5672|0.683|0.3779|0.4359|0.4843|0.7716||||||||||||||||||0.107|-0.413646||,G|upstream_gene_variant|MODIFIER|ASB11|ENSG00000165192|Transcript|ENST00000344384.8|protein_coding||||||||||rs5935947|3345|-1||HGNC|HGNC:17186||5|A1|||0.5672|0.683|0.37…	N	N	0.107	N	N	N
X	15317909	.	A	AT	A	AT	0.0639909	0	0	0.00522193	0.115653	0.00954198	0.00278552	0.0901737	0.0871369	0.0668605	0.117647	0.0740741	0.0330578	0.0487805	0.0762943	0.110874	0.0789474	0.00948767	0.167364	0.186207	0.113208	CSQ=T|downstream_gene_variant|MODIFIER|PIGA|ENSG00000165195|Transcript|ENST00000333590.5|protein_coding||||||||||rs759581805|1541|-1||HGNC|HGNC:8957||1|P1||||||||||||||||||||||||||3.163|0.130356||,T|upstream_gene_variant|MODIFIER|ASB11|ENSG00000165192|Transcript|ENST00000344384.8|protein_coding||||||||||rs759581805|3350|-1||HGNC|HGNC:17186||5|A1||||||||||||||||||||||||||3.163|0.130356|0.868|,T|up…	N	N	3.163	N	N	N
X	15317930	.	C	G	C	G	0.0005298	0.513692	0.0026178	0	0	0	0	0	N	N	N	N	N	N	N	N	N	N	N	N	N	CSQ=G|downstream_gene_variant|MODIFIER|PIGA|ENSG00000165195|Transcript|ENST00000333590.5|protein_coding||||||||||rs769600466|1521|-1||HGNC|HGNC:8957||1|P1|||0.0005|||||||||||||||||||||||0.982|-0.103832||,G|upstream_gene_variant|MODIFIER|ASB11|ENSG00000165192|Transcript|ENST00000344384.8|protein_coding||||||||||rs769600466|3371|-1||HGNC|HGNC:17186||5|A1|||0.0005|||||||||||||||||||||||0.982|-0.1038…	N	N	0.982	N	N	N
X	15317944	.	G	A	G	A	0.0005298	0.513692	0.0026178	0	0	0	0	0	N	N	N	N	N	N	N	N	N	N	N	N	N	CSQ=A|downstream_gene_variant|MODIFIER|PIGA|ENSG00000165195|Transcript|ENST00000333590.5|protein_coding||||||||||rs775075213|1507|-1||HGNC|HGNC:8957||1|P1|||0.0005|||||||||||||||||||||||2.571|0.080898||,A|upstream_gene_variant|MODIFIER|ASB11|ENSG00000165192|Transcript|ENST00000344384.8|protein_coding||||||||||rs775075213|3385|-1||HGNC|HGNC:17186||5|A1|||0.0005|||||||||||||||||||||||2.571|0.080898…	N	N	2.571	N	N	N
X	15317978	.	G	A	G	A	0.0002649	0.513692	0.0013089	0	0	0	0	0	N	N	N	N	N	N	N	N	N	N	N	N	N	CSQ=A|downstream_gene_variant|MODIFIER|PIGA|ENSG00000165195|Transcript|ENST00000333590.5|protein_coding||||||||||rs762488858|1473|-1||HGNC|HGNC:8957||1|P1|||0.0003|||||||||||||||||||||||2.161|0.042746||,A|upstream_gene_variant|MODIFIER|ASB11|ENSG00000165192|Transcript|ENST00000344384.8|protein_coding||||||||||rs762488858|3419|-1||HGNC|HGNC:17186||5|A1|||0.0003|||||||||||||||||||||||2.161|0.042746…	N	N	2.161	N	N	N
X	15318007	.	G	A	G	A	0.0002649	0.513692	0	0	0	0	0.00139276	0	N	N	N	N	N	N	N	N	N	N	N	N	N	CSQ=A|downstream_gene_variant|MODIFIER|PIGA|ENSG00000165195|Transcript|ENST00000333590.5|protein_coding||||||||||rs763874164|1444|-1||HGNC|HGNC:8957||1|P1|||0.0003|||||||||||||||||||||||3.734|0.174814||,A|upstream_gene_variant|MODIFIER|ASB11|ENSG00000165192|Transcript|ENST00000344384.8|protein_coding||||||||||rs763874164|3448|-1||HGNC|HGNC:17186||5|A1|||0.0003|||||||||||||||||||||||3.734|0.174814…	N	N	3.734	N	N	N
X	15318032	.	A	G	A	G	0.00037864	0	0.0026178	0	0	0	0	0.00023793	0	0	0	0	0	0	0.0013624	0	0	0	0	0	0	CSQ=G|downstream_gene_variant|MODIFIER|PIGA|ENSG00000165195|Transcript|ENST00000333590.5|protein_coding||||||||||rs751211195|1419|-1||HGNC|HGNC:8957||1|P1|||0.0005|||||||||||||||||||||||4.788|0.257190||,G|upstream_gene_variant|MODIFIER|ASB11|ENSG00000165192|Transcript|ENST00000344384.8|protein_coding||||||||||rs751211195|3473|-1||HGNC|HGNC:17186||5|A1|||0.0005|||||||||||||||||||||||4.788|0.257190…	N	N	4.788	N	N	N
X	15318033	.	T	C	T	C	0.0005298	0.513692	0.0026178	0	0	0	0	0	N	N	N	N	N	N	N	N	N	N	N	N	N	CSQ=C|downstream_gene_variant|MODIFIER|PIGA|ENSG00000165195|Transcript|ENST00000333590.5|protein_coding||||||||||rs761538205|1418|-1||HGNC|HGNC:8957||1|P1|||0.0005|||||||||||||||||||||||0.164|-0.360562||,C|upstream_gene_variant|MODIFIER|ASB11|ENSG00000165192|Transcript|ENST00000344384.8|protein_coding||||||||||rs761538205|3474|-1||HGNC|HGNC:17186||5|A1|||0.0005|||||||||||||||||||||||0.164|-0.3605…	N	N	0.164	N	N	N
X	15318081	.	G	A	G	A	0.0005298	0.513692	0	0	0	0	0.00278552	0	N	N	N	N	N	N	N	N	N	N	N	N	N	CSQ=A|downstream_gene_variant|MODIFIER|PIGA|ENSG00000165195|Transcript|ENST00000333590.5|protein_coding||||||||||rs766808595|1370|-1||HGNC|HGNC:8957||1|P1|||0.0005|||||||||||||||||||||||3.763|0.176965||,A|upstream_gene_variant|MODIFIER|ASB11|ENSG00000165192|Transcript|ENST00000344384.8|protein_coding||||||||||rs766808595|3522|-1||HGNC|HGNC:17186||5|A1|||0.0005|||||||||||||||||||||||3.763|0.176965…	N	N	3.763	N	N	N
X	15318101	rs7878777	C	T	T	C	0.342042	0	0.566754	0.515666	0.26321	0.612595	0.228412	0.274328	0.348548	0.244186	0.254902	0.425926	0.0578512	0.158537	0.464578	0.0724947	0.236842	0.332068	0.150628	0.234483	0.188679	CSQ=T|downstream_gene_variant|MODIFIER|PIGA|ENSG00000165195|Transcript|ENST00000333590.5|protein_coding||||||||||rs7878777|1350|-1||HGNC|HGNC:8957||1|P1|||0.5823|0.7368|0.3874|0.4332|0.4843|0.7716||||||||||||||||||0.053|-0.500292||,T|upstream_gene_variant|MODIFIER|ASB11|ENSG00000165192|Transcript|ENST00000344384.8|protein_coding||||||||||rs7878777|3542|-1||HGNC|HGNC:17186||5|A1|||0.5823|0.7368|0.…	N	N	0.053	N	N	N
X	15318123	.	T	C	T	C	0.00072324	0.486308	N	N	N	N	N	0.000625	0	0	0	0	0.0165289	0	0	0	0	0	0	0	0	CSQ=C|downstream_gene_variant|MODIFIER|PIGA|ENSG00000165195|Transcript|ENST00000333590.5|protein_coding||||||||||rs944607448|1328|-1||HGNC|HGNC:8957||1|P1||||||||||||||||||||||||||1.295|-0.056018||,C|upstream_gene_variant|MODIFIER|ASB11|ENSG00000165192|Transcript|ENST00000344384.8|protein_coding||||||||||rs944607448|3564|-1||HGNC|HGNC:17186||5|A1||||||||||||||||||||||||||1.295|-0.056018|0.868|,C|…	N	N	1.295	N	N	N
X	15318173	.	C	T	C	T	0.00048216	0.486308	N	N	N	N	N	0.000625	0	0	0	0	0	0	0	0	0	0	0	0.0137931	0	CSQ=T|downstream_gene_variant|MODIFIER|PIGA|ENSG00000165195|Transcript|ENST00000333590.5|protein_coding|||||||||||1278|-1||HGNC|HGNC:8957||1|P1||||||||||||||||||||||||||6.226|0.384960||,T|upstream_gene_variant|MODIFIER|ASB11|ENSG00000165192|Transcript|ENST00000344384.8|protein_coding|||||||||||3614|-1||HGNC|HGNC:17186||5|A1||||||||||||||||||||||||||6.226|0.384960|0.868|,T|upstream_gene_variant|MO…	N	N	6.226	N	N	N
X	15318197	rs6632312	A	C	A	C	0.00313404	0.486308	N	N	N	N	N	0.0034375	0	0.00581395	0	0	0	0	0	0.0191898	0	0	0	0	0	CSQ=C|downstream_gene_variant|MODIFIER|PIGA|ENSG00000165195|Transcript|ENST00000333590.5|protein_coding||||||||||rs6632312|1254|-1||HGNC|HGNC:8957||1|P1||||||||||||||||||||||||||1.560|-0.022072||,C|upstream_gene_variant|MODIFIER|ASB11|ENSG00000165192|Transcript|ENST00000344384.8|protein_coding||||||||||rs6632312|3638|-1||HGNC|HGNC:17186||5|A1||||||||||||||||||||||||||1.560|-0.022072|0.868|,C|upst…	N	N	1.56	N	N	N
X	15318216	.	G	C	G	C	0.00048216	0.486308	N	N	N	N	N	0.000625	0.00414938	0	0	0	0	0	0.0013624	0	0	0	0	0	0	CSQ=C|downstream_gene_variant|MODIFIER|PIGA|ENSG00000165195|Transcript|ENST00000333590.5|protein_coding|||||||||||1235|-1||HGNC|HGNC:8957||1|P1||||||||||||||||||||||||||0.355|-0.259523||,C|upstream_gene_variant|MODIFIER|ASB11|ENSG00000165192|Transcript|ENST00000344384.8|protein_coding|||||||||||3657|-1||HGNC|HGNC:17186||5|A1||||||||||||||||||||||||||0.355|-0.259523|0.868|,C|upstream_gene_variant|…	N	N	0.355	N	N	N
X	15318228	.	G	A	G	A	0.0002649	0.513692	0	0	0	0.0019084	0	0	N	N	N	N	N	N	N	N	N	N	N	N	N	CSQ=A|downstream_gene_variant|MODIFIER|PIGA|ENSG00000165195|Transcript|ENST00000333590.5|protein_coding||||||||||rs755567965|1223|-1||HGNC|HGNC:8957||1|P1|||0.0003|||||||||||||||||||||||1.149|-0.077011||,A|upstream_gene_variant|MODIFIER|ASB11|ENSG00000165192|Transcript|ENST00000344384.8|protein_coding||||||||||rs755567965|3669|-1||HGNC|HGNC:17186||5|A1|||0.0003|||||||||||||||||||||||1.149|-0.0770…	N	N	1.149	N	N	N
X	15318243	.	G	A	G	A	0.0002649	0.513692	0.0013089	0	0	0	0	0	N	N	N	N	N	N	N	N	N	N	N	N	N	CSQ=A|downstream_gene_variant|MODIFIER|PIGA|ENSG00000165195|Transcript|ENST00000333590.5|protein_coding||||||||||rs779232012|1208|-1||HGNC|HGNC:8957||1|P1|||0.0003|||||||||||||||||||||||3.046|0.120966||,A|upstream_gene_variant|MODIFIER|ASB11|ENSG00000165192|Transcript|ENST00000344384.8|protein_coding||||||||||rs779232012|3684|-1||HGNC|HGNC:17186||5|A1|||0.0003|||||||||||||||||||||||3.046|0.120966…	N	N	3.046	N	N	N
X	15318264	.	T	C	T	C	0.00072324	0.486308	N	N	N	N	N	0.000625	0.00414938	0	0	0	0.00826446	0	0	0	0	0	0	0	0	CSQ=C|downstream_gene_variant|MODIFIER|PIGA|ENSG00000165195|Transcript|ENST00000333590.5|protein_coding||||||||||rs868059934|1187|-1||HGNC|HGNC:8957||1|P1||||||||||||||||||||||||||3.078|0.123534||,C|upstream_gene_variant|MODIFIER|ASB11|ENSG00000165192|Transcript|ENST00000344384.8|protein_coding||||||||||rs868059934|3705|-1||HGNC|HGNC:17186||5|A1||||||||||||||||||||||||||3.078|0.123534|0.868|,C|up…	N	N	3.078	N	N	N
X	15318268	.	T	C	T	C	0.00113593	0	0	0	0.00398804	0	0	0.0019034	0	0.00290698	0	0	0	0.0121951	0	0.0021322	0	0	0	0.00689655	0	CSQ=C|downstream_gene_variant|MODIFIER|PIGA|ENSG00000165195|Transcript|ENST00000333590.5|protein_coding||||||||||rs752803379|1183|-1||HGNC|HGNC:8957||1|P1|||0.0011|||||||||||||||||||||||4.604|0.242387||,C|upstream_gene_variant|MODIFIER|ASB11|ENSG00000165192|Transcript|ENST00000344384.8|protein_coding||||||||||rs752803379|3709|-1||HGNC|HGNC:17186||5|A1|||0.0011|||||||||||||||||||||||4.604|0.242387…	N	N	4.604	N	N	N
X	15318307	rs5935948	T	C	T	C	0.275148	0	0.422775	0.395561	0.139581	0.28626	0.623955	0.177254	0.236515	0.142442	0.169935	0.203704	0.31405	0.170732	0.257493	0.0362473	0.236842	0.197343	0.179916	0.262069	0.188679	CSQ=C|downstream_gene_variant|MODIFIER|PIGA|ENSG00000165195|Transcript|ENST00000333590.5|protein_coding||||||||||rs5935948|1144|-1||HGNC|HGNC:8957||1|P1|||0.3613|0.1396|0.2863|0.4228|0.3956|0.624||||||||||||||||||0.085|-0.441969||,C|upstream_gene_variant|MODIFIER|ASB11|ENSG00000165192|Transcript|ENST00000344384.8|protein_coding||||||||||rs5935948|3748|-1||HGNC|HGNC:17186||5|A1|||0.3613|0.1396|0.2…	N	N	0.085	N	N	N
X	15318325	rs185389763	G	A	G	A	0.00277673	0	0	0.0104439	0	0	0.00278552	0.00214133	0.00414938	0	0	0.0185185	0	0	0.00953678	0	0	0	0	0	0	CSQ=A|downstream_gene_variant|MODIFIER|PIGA|ENSG00000165195|Transcript|ENST00000333590.5|protein_coding||||||||||rs185389763|1126|-1||HGNC|HGNC:8957||1|P1|||0.0026|0|0|0|0.0104|0.0028||||||||||||||||||3.318|0.142606||,A|upstream_gene_variant|MODIFIER|ASB11|ENSG00000165192|Transcript|ENST00000344384.8|protein_coding||||||||||rs185389763|3766|-1||HGNC|HGNC:17186||5|A1|||0.0026|0|0|0|0.0104|0.0028||…	N	N	3.318	N	N	N
X	15318337	.	T	TC	T	TC	0.0002649	0.513692	0	0	0	0.0019084	0	0	N	N	N	N	N	N	N	N	N	N	N	N	N	CSQ=C|downstream_gene_variant|MODIFIER|PIGA|ENSG00000165195|Transcript|ENST00000333590.5|protein_coding||||||||||rs747270778|1113|-1||HGNC|HGNC:8957||1|P1|||||||||||||||||||||||||||||,C|upstream_gene_variant|MODIFIER|ASB11|ENSG00000165192|Transcript|ENST00000344384.8|protein_coding||||||||||rs747270778|3778|-1||HGNC|HGNC:17186||5|A1||||||||||||||||||||||||||||0.868|,C|upstream_gene_variant|MODIFI…	N	N	N	N	N	N
X	15318393	.	G	C	G	C	0.00024108	0.486308	N	N	N	N	N	0.0003125	0	0	0.00653595	0	0	0	0	0	0	0	0	0	0	CSQ=C|downstream_gene_variant|MODIFIER|PIGA|ENSG00000165195|Transcript|ENST00000333590.5|protein_coding|||||||||||1058|-1||HGNC|HGNC:8957||1|P1||||||||||||||||||||||||||3.902|0.187631||,C|upstream_gene_variant|MODIFIER|ASB11|ENSG00000165192|Transcript|ENST00000344384.8|protein_coding|||||||||||3834|-1||HGNC|HGNC:17186||5|A1||||||||||||||||||||||||||3.902|0.187631|0.868|,C|upstream_gene_variant|MO…	N	N	3.902	N	N	N
X	15318409	.	C	G	C	G	0.00072324	0.486308	N	N	N	N	N	0.0009375	0	0	0	0	0	0	0.00408719	0	0	0	0	0	0	CSQ=G|downstream_gene_variant|MODIFIER|PIGA|ENSG00000165195|Transcript|ENST00000333590.5|protein_coding||||||||||rs966467874|1042|-1||HGNC|HGNC:8957||1|P1||||||||||||||||||||||||||0.728|-0.153026||,G|upstream_gene_variant|MODIFIER|ASB11|ENSG00000165192|Transcript|ENST00000344384.8|protein_coding||||||||||rs966467874|3850|-1||HGNC|HGNC:17186||5|A1||||||||||||||||||||||||||0.728|-0.153026|0.868|,G|…	N	N	0.728	N	N	N
X	15318441	rs146804970	C	T	C	T	0.0542724	0	0	0.00522193	0.0877368	0.00763359	0.00278552	0.0778016	0.0829875	0.0494186	0.117647	0.0555556	0.0330578	0.0487805	0.0613079	0.104478	0.0789474	0.00948767	0.16318	0.186207	0.0943396	CSQ=T|downstream_gene_variant|MODIFIER|PIGA|ENSG00000165195|Transcript|ENST00000333590.5|protein_coding||||||||||rs146804970|1010|-1||HGNC|HGNC:8957||1|P1|||0.0260|0.0877|0.0076|0|0.0052|0.0028||||||||||||||||||0.534|-0.201058||,T|upstream_gene_variant|MODIFIER|ASB11|ENSG00000165192|Transcript|ENST00000344384.8|protein_coding||||||||||rs146804970|3882|-1||HGNC|HGNC:17186||5|A1|||0.0260|0.0877|0.0…	N	N	0.534	N	N	N
X	15318457	.	A	G	A	G	0.0002649	0.513692	0	0	0.00099701	0	0	0.00099701	N	N	N	N	N	N	N	N	N	N	N	N	N	CSQ=G|downstream_gene_variant|MODIFIER|PIGA|ENSG00000165195|Transcript|ENST00000333590.5|protein_coding||||||||||rs781095493|994|-1||HGNC|HGNC:8957||1|P1|||0.0003|||||||||||||||||||||||9.682|0.774456||,G|upstream_gene_variant|MODIFIER|ASB11|ENSG00000165192|Transcript|ENST00000344384.8|protein_coding||||||||||rs781095493|3898|-1||HGNC|HGNC:17186||5|A1|||0.0003|||||||||||||||||||||||9.682|0.774456|…	N	N	9.682	N	N	N
X	15318497	rs5935949	C	T	T	T	0.34444	0	0.420157	0.400783	0.286142	0.299618	0.637883	0.277897	0.323651	0.203488	0.294118	0.277778	0.355372	0.231707	0.318801	0.142857	0.342105	0.212524	0.414226	0.448276	0.396226	CSQ=T|downstream_gene_variant|MODIFIER|PIGA|ENSG00000165195|Transcript|ENST00000333590.5|protein_coding||||||||||rs5935949|954|-1||HGNC|HGNC:8957||1|P1|||0.4053|0.2861|0.2996|0.4202|0.4008|0.6379||||||||||||||||||1.593|-0.018129||,T|upstream_gene_variant|MODIFIER|ASB11|ENSG00000165192|Transcript|ENST00000344384.8|protein_coding||||||||||rs5935949|3938|-1||HGNC|HGNC:17186||5|A1|||0.4053|0.2861|0.2…	N	N	1.593	N	N	N
X	15318502	.	T	C	T	C	0.0002649	0.513692	0	0.00130548	0	0	0	0	N	N	N	N	N	N	N	N	N	N	N	N	N	CSQ=C|downstream_gene_variant|MODIFIER|PIGA|ENSG00000165195|Transcript|ENST00000333590.5|protein_coding||||||||||rs769772004|949|-1||HGNC|HGNC:8957||1|P1|||0.0003|||||||||||||||||||||||3.379|0.147344||,C|upstream_gene_variant|MODIFIER|ASB11|ENSG00000165192|Transcript|ENST00000344384.8|protein_coding||||||||||rs769772004|3943|-1||HGNC|HGNC:17186||5|A1|||0.0003|||||||||||||||||||||||3.379|0.147344|…	N	N	3.379	N	N	N
X	15318510	.	C	T	C	T	0.00063107	0	0	0	0.00398804	0	0	0.0009517	0	0	0	0	0	0	0	0	0	0	0	0	0	CSQ=T|downstream_gene_variant|MODIFIER|PIGA|ENSG00000165195|Transcript|ENST00000333590.5|protein_coding||||||||||rs775532238|941|-1||HGNC|HGNC:8957||1|P1|||0.0011|||||||||||||||||||||||3.503|0.157035||,T|upstream_gene_variant|MODIFIER|ASB11|ENSG00000165192|Transcript|ENST00000344384.8|protein_coding||||||||||rs775532238|3951|-1||HGNC|HGNC:17186||5|A1|||0.0011|||||||||||||||||||||||3.503|0.157035|…	N	N	3.503	N	N	N
X	15318596	.	C	A	C	A	0.00024108	0.486308	N	N	N	N	N	0	0	0	0	0	0	0	0	0	0	0	0	0	0	CSQ=A|downstream_gene_variant|MODIFIER|PIGA|ENSG00000165195|Transcript|ENST00000333590.5|protein_coding|||||||||||855|-1||HGNC|HGNC:8957||1|P1||||||||||||||||||||||||||5.771|0.341933||,A|upstream_gene_variant|MODIFIER|ASB11|ENSG00000165192|Transcript|ENST00000344384.8|protein_coding|||||||||||4037|-1||HGNC|HGNC:17186||5|A1||||||||||||||||||||||||||5.771|0.341933|0.868|,A|upstream_gene_variant|MOD…	N	N	5.771	N	N	N
X	15318693	.	G	C	G	C	0.00024108	0.486308	N	N	N	N	N	0.0003125	0.00414938	0	0	0	0	0	0	0	0	0	0	0	0	CSQ=C|downstream_gene_variant|MODIFIER|PIGA|ENSG00000165195|Transcript|ENST00000333590.5|protein_coding|||||||||||758|-1||HGNC|HGNC:8957||1|P1||||||||||||||||||||||||||0.258|-0.302244||,C|upstream_gene_variant|MODIFIER|ASB11|ENSG00000165192|Transcript|ENST00000344384.8|protein_coding|||||||||||4134|-1||HGNC|HGNC:17186||5|A1||||||||||||||||||||||||||0.258|-0.302244|0.868|,C|upstream_gene_variant|M…	N	N	0.258	N	N	N
X	15318701	rs111566753	A	G	A	G	0.00458052	0.486308	N	N	N	N	N	0.00375	0	0	0.0130719	0	0.0826446	0	0	0	0	0	0	0	0	CSQ=G|downstream_gene_variant|MODIFIER|PIGA|ENSG00000165195|Transcript|ENST00000333590.5|protein_coding||||||||||rs111566753|750|-1||HGNC|HGNC:8957||1|P1||||||||||||||||||||||||||0.939|-0.111439||,G|upstream_gene_variant|MODIFIER|ASB11|ENSG00000165192|Transcript|ENST00000344384.8|protein_coding||||||||||rs111566753|4142|-1||HGNC|HGNC:17186||5|A1||||||||||||||||||||||||||0.939|-0.111439|0.868|,G|u…	N	N	0.939	N	N	N
X	15318724	rs5935950	G	A	A	G	0.365644	0	0.566754	0.516971	0.31007	0.622137	0.228412	0.307399	0.373444	0.313953	0.261438	0.462963	0.0826446	0.207317	0.476839	0.0938166	0.315789	0.341556	0.221757	0.248276	0.301887	CSQ=A|downstream_gene_variant|MODIFIER|PIGA|ENSG00000165195|Transcript|ENST00000333590.5|protein_coding||||||||||rs5935950|727|-1||HGNC|HGNC:8957||1|P1|||0.5682|0.6899|0.3779|0.4332|0.483|0.7716||||||||||||||||||0.915|-0.115770||,A|upstream_gene_variant|MODIFIER|ASB11|ENSG00000165192|Transcript|ENST00000344384.8|protein_coding||||||||||rs5935950|4165|-1||HGNC|HGNC:17186||5|A1|||0.5682|0.6899|0.37…	N	N	0.915	N	N	N
X	15318725	rs148134879	C	T	T	T	0.0638647	0	0	0.00522193	0.115653	0.00763359	0.00278552	0.0901737	0.0871369	0.0668605	0.117647	0.0740741	0.0330578	0.0487805	0.0762943	0.110874	0.0789474	0.00948767	0.167364	0.186207	0.113208	CSQ=T|downstream_gene_variant|MODIFIER|PIGA|ENSG00000165195|Transcript|ENST00000333590.5|protein_coding||||||||||rs148134879|726|-1||HGNC|HGNC:8957||1|P1|||0.0334|0.1157|0.0076|0|0.0052|0.0028||||||||||||||||||0.008|-0.740155||,T|upstream_gene_variant|MODIFIER|ASB11|ENSG00000165192|Transcript|ENST00000344384.8|protein_coding||||||||||rs148134879|4166|-1||HGNC|HGNC:17186||5|A1|||0.0334|0.1157|0.00…	N	N	0.008	N	N	N
X	15318740	.	T	G	T	G	0.0010596	0.513692	0	0.00130548	0	0	0.00417827	0	N	N	N	N	N	N	N	N	N	N	N	N	N	CSQ=G|downstream_gene_variant|MODIFIER|PIGA|ENSG00000165195|Transcript|ENST00000333590.5|protein_coding||||||||||rs773970558|711|-1||HGNC|HGNC:8957||1|P1|||0.0011|||||||||||||||||||||||4.151|0.206813||,G|upstream_gene_variant|MODIFIER|ASB11|ENSG00000165192|Transcript|ENST00000344384.8|protein_coding||||||||||rs773970558|4181|-1||HGNC|HGNC:17186||5|A1|||0.0011|||||||||||||||||||||||4.151|0.206813|…	N	N	4.151	N	N	N
X	15318788	rs141966153	C	T	C	T	0.0639909	0	0	0.00522193	0.115653	0.00954198	0.00278552	0.0901737	0.0871369	0.0668605	0.117647	0.0740741	0.0330578	0.0487805	0.0762943	0.110874	0.0789474	0.00948767	0.167364	0.186207	0.113208	CSQ=T|downstream_gene_variant|MODIFIER|PIGA|ENSG00000165195|Transcript|ENST00000333590.5|protein_coding||||||||||rs141966153|663|-1||HGNC|HGNC:8957||1|P1|||0.0336|0.1157|0.0095|0|0.0052|0.0028||||||||||||||||||0.779|-0.142155||,T|upstream_gene_variant|MODIFIER|ASB11|ENSG00000165192|Transcript|ENST00000344384.8|protein_coding||||||||||rs141966153|4229|-1||HGNC|HGNC:17186||5|A1|||0.0336|0.1157|0.00…	N	N	0.779	N	N	N
X	15318799	.	C	T	C	T	0.00144648	0.486308	N	N	N	N	N	0.0015625	0	0	0	0	0	0	0.00544959	0	0	0	0	0	0.0188679	CSQ=T|downstream_gene_variant|MODIFIER|PIGA|ENSG00000165195|Transcript|ENST00000333590.5|protein_coding||||||||||rs952089719|652|-1||HGNC|HGNC:8957||1|P1||||||||||||||||||||||||||0.109|-0.411764||,T|upstream_gene_variant|MODIFIER|ASB11|ENSG00000165192|Transcript|ENST00000344384.8|protein_coding||||||||||rs952089719|4240|-1||HGNC|HGNC:17186||5|A1||||||||||||||||||||||||||0.109|-0.411764|0.868|,T|u…	N	N	0.109	N	N	N
X	15318800	rs150262776	G	A	G	A	0.00403887	0	0	0.00130548	0.0109671	0	0	0.00594813	0.00414938	0.00290698	0	0	0	0	0.00408719	0	0	0	0	0.0275862	0.0943396	CSQ=A|downstream_gene_variant|MODIFIER|PIGA|ENSG00000165195|Transcript|ENST00000333590.5|protein_coding||||||||||rs150262776|651|-1||HGNC|HGNC:8957||1|P1|||0.0032|0.011|0|0|0.0013|0||||||||||||||||||0.539|-0.199604||,A|upstream_gene_variant|MODIFIER|ASB11|ENSG00000165192|Transcript|ENST00000344384.8|protein_coding||||||||||rs150262776|4241|-1||HGNC|HGNC:17186||5|A1|||0.0032|0.011|0|0|0.0013|0||||…	N	N	0.539	N	N	N
X	15318805	rs113568737	A	G	A	G	0.0459422	0	0	0	0.0408774	0.0114504	0.00139276	0.0737568	0.112033	0.0610465	0.104575	0.0740741	0.0661157	0.097561	0.0817439	0	0.0789474	0.185958	0.0041841	0.124138	0.0943396	CSQ=G|downstream_gene_variant|MODIFIER|PIGA|ENSG00000165195|Transcript|ENST00000333590.5|protein_coding||||||||||rs113568737|646|-1||HGNC|HGNC:8957||1|P1|||0.0127|0.0409|0.0115|0|0|0.0014||||||||||||||||||3.304|0.141505||,G|upstream_gene_variant|MODIFIER|ASB11|ENSG00000165192|Transcript|ENST00000344384.8|protein_coding||||||||||rs113568737|4246|-1||HGNC|HGNC:17186||5|A1|||0.0127|0.0409|0.0115|0|0…	N	N	3.304	N	N	N
X	15318820	rs374688035	A	G	A	G	0.0005298	0.513692	0.0026178	0	0	0	0	0	N	N	N	N	N	N	N	N	N	N	N	N	N	CSQ=G|downstream_gene_variant|MODIFIER|PIGA|ENSG00000165195|Transcript|ENST00000333590.5|protein_coding||||||||||rs374688035|631|-1||HGNC|HGNC:8957||1|P1|||0.0005|0|0|0.0026|0|0||||||||||||||||||0.599|-0.183617||,G|upstream_gene_variant|MODIFIER|ASB11|ENSG00000165192|Transcript|ENST00000344384.8|protein_coding||||||||||rs374688035|4261|-1||HGNC|HGNC:17186||5|A1|||0.0005|0|0|0.0026|0|0||||||||||||…	N	N	0.599	N	N	N
X	15318867	.	C	G	C	G	0.00353401	0	0	0	0.00897308	0	0	0.00594813	0.00414938	0.00872093	0	0	0	0	0	0	0	0.0227704	0	0	0	CSQ=G|downstream_gene_variant|MODIFIER|PIGA|ENSG00000165195|Transcript|ENST00000333590.5|protein_coding||||||||||rs765795144|584|-1||HGNC|HGNC:8957||1|P1|||0.0024|||||||||||||||||||||||0.014|-0.660268||,G|upstream_gene_variant|MODIFIER|ASB11|ENSG00000165192|Transcript|ENST00000344384.8|protein_coding||||||||||rs765795144|4308|-1||HGNC|HGNC:17186||5|A1|||0.0024|||||||||||||||||||||||0.014|-0.66026…	N	N	0.014	N	N	N
X	15318896	.	C	T	C	T	0.00458052	0.486308	N	N	N	N	N	0.0046875	0	0	0	0.0185185	0	0	0.0190736	0	0	0	0	0	0	CSQ=T|downstream_gene_variant|MODIFIER|PIGA|ENSG00000165195|Transcript|ENST00000333590.5|protein_coding||||||||||rs937357467|555|-1||HGNC|HGNC:8957||1|P1||||||||||||||||||||||||||0.418|-0.236788||,T|upstream_gene_variant|MODIFIER|ASB11|ENSG00000165192|Transcript|ENST00000344384.8|protein_coding||||||||||rs937357467|4337|-1||HGNC|HGNC:17186||5|A1||||||||||||||||||||||||||0.418|-0.236788|0.868|,T|u…	N	N	0.418	N	N	N
X	15318915	.	C	T	C	T	0.00024108	0.486308	N	N	N	N	N	0	0	0	0	0	0	0	0	0	0	0	0	0	0	CSQ=T|downstream_gene_variant|MODIFIER|PIGA|ENSG00000165195|Transcript|ENST00000333590.5|protein_coding||||||||||rs1056234563|536|-1||HGNC|HGNC:8957||1|P1||||||||||||||||||||||||||0.045|-0.519659||,T|upstream_gene_variant|MODIFIER|ASB11|ENSG00000165192|Transcript|ENST00000344384.8|protein_coding||||||||||rs1056234563|4356|-1||HGNC|HGNC:17186||5|A1||||||||||||||||||||||||||0.045|-0.519659|0.868|,T…	N	N	0.045	N	N	N
X	15318920	.	G	A	G	A	0.0002649	0.513692	0	0	0	0	0.00139276	0	N	N	N	N	N	N	N	N	N	N	N	N	N	CSQ=A|downstream_gene_variant|MODIFIER|PIGA|ENSG00000165195|Transcript|ENST00000333590.5|protein_coding||||||||||rs753252677|531|-1||HGNC|HGNC:8957||1|P1|||0.0003|||||||||||||||||||||||2.655|0.088291||,A|upstream_gene_variant|MODIFIER|ASB11|ENSG00000165192|Transcript|ENST00000344384.8|protein_coding||||||||||rs753252677|4361|-1||HGNC|HGNC:17186||5|A1|||0.0003|||||||||||||||||||||||2.655|0.088291|…	N	N	2.655	N	N	N
X	15318923	.	G	A	G	A	0.00227187	0	0	0	0	0	0.0111421	0.00237925	0	0	0	0	0	0	0	0.021322	0	0	0	0	0	CSQ=A|downstream_gene_variant|MODIFIER|PIGA|ENSG00000165195|Transcript|ENST00000333590.5|protein_coding||||||||||rs758871261|528|-1||HGNC|HGNC:8957||1|P1|||0.0021|||||||||||||||||||||||0.076|-0.455805||,A|upstream_gene_variant|MODIFIER|ASB11|ENSG00000165192|Transcript|ENST00000344384.8|protein_coding||||||||||rs758871261|4364|-1||HGNC|HGNC:17186||5|A1|||0.0021|||||||||||||||||||||||0.076|-0.45580…	N	N	0.076	N	N	N
X	15318924	.	G	GA	G	GA	0.00024108	0.486308	N	N	N	N	N	0.0003125	0	0	0	0	0	0	0.0013624	0	0	0	0	0	0	CSQ=A|downstream_gene_variant|MODIFIER|PIGA|ENSG00000165195|Transcript|ENST00000333590.5|protein_coding|||||||||||526|-1||HGNC|HGNC:8957||1|P1|||||||||||||||||||||||||||||,A|upstream_gene_variant|MODIFIER|ASB11|ENSG00000165192|Transcript|ENST00000344384.8|protein_coding|||||||||||4365|-1||HGNC|HGNC:17186||5|A1||||||||||||||||||||||||||||0.868|,A|upstream_gene_variant|MODIFIER|ASB11|ENSG0000016519…	N	N	N	N	N	N
X	15318956	.	A	T	A	T	0.0002649	0.513692	0.0013089	0	0	0	0	0	N	N	N	N	N	N	N	N	N	N	N	N	N	CSQ=T|downstream_gene_variant|MODIFIER|PIGA|ENSG00000165195|Transcript|ENST00000333590.5|protein_coding||||||||||rs777892004|495|-1||HGNC|HGNC:8957||1|P1|||0.0003|||||||||||||||||||||||2.200|0.046597||,T|upstream_gene_variant|MODIFIER|ASB11|ENSG00000165192|Transcript|ENST00000344384.8|protein_coding||||||||||rs777892004|4397|-1||HGNC|HGNC:17186||5|A1|||0.0003|||||||||||||||||||||||2.200|0.046597|…	N	N	2.2	N	N	N
X	15318987	.	G	A	G	A	0.0002649	0.513692	0	0	0	0	0.00139276	0	N	N	N	N	N	N	N	N	N	N	N	N	N	CSQ=A|downstream_gene_variant|MODIFIER|PIGA|ENSG00000165195|Transcript|ENST00000333590.5|protein_coding||||||||||rs751621287|464|-1||HGNC|HGNC:8957||1|P1|||0.0003|||||||||||||||||||||||0.042|-0.529652||,A|upstream_gene_variant|MODIFIER|ASB11|ENSG00000165192|Transcript|ENST00000344384.8|protein_coding||||||||||rs751621287|4428|-1||HGNC|HGNC:17186||5|A1|||0.0003|||||||||||||||||||||||0.042|-0.52965…	N	N	0.042	N	N	N
X	15318988	rs138954722	T	C	T	C	0.0209517	0	0.0039267	0	0.0358923	0.0019084	0.0376045	0.0245063	0.0290456	0.0523256	0.0196078	0	0	0.0365854	0.0245232	0.00639659	0.0263158	0.0113852	0.0041841	0.0413793	0.0188679	CSQ=C|downstream_gene_variant|MODIFIER|PIGA|ENSG00000165195|Transcript|ENST00000333590.5|protein_coding||||||||||rs138954722|463|-1||HGNC|HGNC:8957||1|P1|||0.0178|0.0359|0.0019|0.0039|0|0.0376||||||||||||||||||4.289|0.217577||,C|upstream_gene_variant|MODIFIER|ASB11|ENSG00000165192|Transcript|ENST00000344384.8|protein_coding||||||||||rs138954722|4429|-1||HGNC|HGNC:17186||5|A1|||0.0178|0.0359|0.001…	N	N	4.289	N	N	N
X	15319022	rs6632314	C	A	A	C	0.365897	0	0.565445	0.515666	0.311067	0.622137	0.229805	0.307637	0.373444	0.313953	0.261438	0.462963	0.0826446	0.207317	0.476839	0.0938166	0.315789	0.341556	0.221757	0.248276	0.301887	CSQ=A|downstream_gene_variant|MODIFIER|PIGA|ENSG00000165195|Transcript|ENST00000333590.5|protein_coding||||||||||rs6632314|429|-1||HGNC|HGNC:8957||1|P1||||0.6889|0.3779|0.4346|0.4843|0.7702||||||||||||||||||1.008|-0.099485||,A|upstream_gene_variant|MODIFIER|ASB11|ENSG00000165192|Transcript|ENST00000344384.8|protein_coding||||||||||rs6632314|4463|-1||HGNC|HGNC:17186||5|A1||||0.6889|0.3779|0.4346|0…	N	N	1.008	N	N	N
X	15319046	.	AAAAG	A	A	A	0.018543	0.513692	0.0078534	0	0.0598205	0.00572519	0.00139276	0.0598205	N	N	N	N	N	N	N	N	N	N	N	N	N	CSQ=-|downstream_gene_variant|MODIFIER|PIGA|ENSG00000165195|Transcript|ENST00000333590.5|protein_coding||||||||||rs35002857|401|-1||HGNC|HGNC:8957||1|P1||||||||||||||||||||||||||0.430|-0.232732||,-|upstream_gene_variant|MODIFIER|ASB11|ENSG00000165192|Transcript|ENST00000344384.8|protein_coding||||||||||rs35002857|4488|-1||HGNC|HGNC:17186||5|A1||||||||||||||||||||||||||0.430|-0.232732|0.868|,-|ups…	N	N	0.43	N	N	N
X	15319086	rs186122831	T	C	T	C	0.0010596	0.513692	0	0.00522193	0	0	0	0	N	N	N	N	N	N	N	N	N	N	N	N	N	CSQ=C|downstream_gene_variant|MODIFIER|PIGA|ENSG00000165195|Transcript|ENST00000333590.5|protein_coding||||||||||rs186122831|365|-1||HGNC|HGNC:8957||1|P1|||0.0011|0|0|0|0.0052|0||||||||||||||||||5.588|0.325358||,C|upstream_gene_variant|MODIFIER|ASB11|ENSG00000165192|Transcript|ENST00000344384.8|protein_coding||||||||||rs186122831|4527|-1||HGNC|HGNC:17186||5|A1|||0.0011|0|0|0|0.0052|0|||||||||||||…	N	N	5.588	N	N	N
X	15319098	.	G	A	G	A	0.0002649	0.513692	0	0	0	0.0019084	0	0	N	N	N	N	N	N	N	N	N	N	N	N	N	CSQ=A|downstream_gene_variant|MODIFIER|PIGA|ENSG00000165195|Transcript|ENST00000333590.5|protein_coding||||||||||rs768711210|353|-1||HGNC|HGNC:8957||1|P1|||0.0003|||||||||||||||||||||||5.650|0.330949||,A|upstream_gene_variant|MODIFIER|ASB11|ENSG00000165192|Transcript|ENST00000344384.8|protein_coding||||||||||rs768711210|4539|-1||HGNC|HGNC:17186||5|A1|||0.0003|||||||||||||||||||||||5.650|0.330949|…	N	N	5.65	N	N	N
X	15319158	.	T	C	T	C	0.00048216	0.486308	N	N	N	N	N	0	0	0	0	0	0	0	0	0	0	0	0	0	0	CSQ=C|downstream_gene_variant|MODIFIER|PIGA|ENSG00000165195|Transcript|ENST00000333590.5|protein_coding||||||||||rs753172767|293|-1||HGNC|HGNC:8957||1|P1||||||||||||||||||||||||||0.397|-0.243959||,C|upstream_gene_variant|MODIFIER|ASB11|ENSG00000165192|Transcript|ENST00000344384.8|protein_coding||||||||||rs753172767|4599|-1||HGNC|HGNC:17186||5|A1||||||||||||||||||||||||||0.397|-0.243959|0.868|,C|u…	N	N	0.397	N	N	N
X	15319180	rs191803242	T	C	T	C	0.0002649	0.513692	0.0013089	0	0	0	0	0	N	N	N	N	N	N	N	N	N	N	N	N	N	CSQ=C|downstream_gene_variant|MODIFIER|PIGA|ENSG00000165195|Transcript|ENST00000333590.5|protein_coding||||||||||rs191803242|271|-1||HGNC|HGNC:8957||1|P1|||0.0003|0|0|0.0013|0|0||||||||||||||||||3.537|0.159601||,C|upstream_gene_variant|MODIFIER|ASB11|ENSG00000165192|Transcript|ENST00000344384.8|protein_coding||||||||||rs191803242|4621|-1||HGNC|HGNC:17186||5|A1|||0.0003|0|0|0.0013|0|0|||||||||||||…	N	N	3.537	N	N	N
X	15319254	.	G	A	G	A	0.0002649	0.513692	0	0	0.00099701	0	0	0.00099701	N	N	N	N	N	N	N	N	N	N	N	N	N	CSQ=A|downstream_gene_variant|MODIFIER|PIGA|ENSG00000165195|Transcript|ENST00000333590.5|protein_coding||||||||||rs747555906|197|-1||HGNC|HGNC:8957||1|P1|||0.0003|||||||||||||||||||||||2.436|0.068759||,A|upstream_gene_variant|MODIFIER|ASB11|ENSG00000165192|Transcript|ENST00000344384.8|protein_coding||||||||||rs747555906|4695|-1||HGNC|HGNC:17186||5|A1|||0.0003|||||||||||||||||||||||2.436|0.068759|…	N	N	2.436	N	N	N
X	15319263	rs73447247	T	C	T	C	0.0148933	0	0	0	0.0478564	0.00572519	0	0.0226029	0.0124481	0.0523256	0	0	0.0247934	0.0365854	0	0.0234542	0	0.00948767	0.0167364	0	0	CSQ=C|downstream_gene_variant|MODIFIER|PIGA|ENSG00000165195|Transcript|ENST00000333590.5|protein_coding||||||||||rs73447247|188|-1||HGNC|HGNC:8957||1|P1|||0.0135|0.0479|0.0057|0|0|0||||||||||||||||||4.223|0.212406||,C|upstream_gene_variant|MODIFIER|ASB11|ENSG00000165192|Transcript|ENST00000344384.8|protein_coding||||||||||rs73447247|4704|-1||HGNC|HGNC:17186||5|A1|||0.0135|0.0479|0.0057|0|0|0|||||…	N	N	4.223	N	N	N
X	15319266	.	G	C	G	C	0.00337512	0.486308	N	N	N	N	N	0.0028125	0	0	0.00653595	0	0.0661157	0	0	0	0	0	0	0	0	CSQ=C|downstream_gene_variant|MODIFIER|PIGA|ENSG00000165195|Transcript|ENST00000333590.5|protein_coding||||||||||rs1223146046|185|-1||HGNC|HGNC:8957||1|P1||||||||||||||||||||||||||2.569|0.080679||,C|upstream_gene_variant|MODIFIER|ASB11|ENSG00000165192|Transcript|ENST00000344384.8|protein_coding||||||||||rs1223146046|4707|-1||HGNC|HGNC:17186||5|A1||||||||||||||||||||||||||2.569|0.080679|0.868|,C|u…	N	N	2.569	N	N	N
X	15319392	rs73635083	G	A	G	A	0.00063107	0	0	0	0.00398804	0	0	0.0009517	0	0	0	0	0	0	0	0	0	0	0	0	0	CSQ=A|downstream_gene_variant|MODIFIER|PIGA|ENSG00000165195|Transcript|ENST00000333590.5|protein_coding||||||||||rs73635083|59|-1||HGNC|HGNC:8957||1|P1|||0.0011|0.004|0|0|0|0||||||||||||||||||1.660|-0.010352||,A|upstream_gene_variant|MODIFIER|ASB11|ENSG00000165192|Transcript|ENST00000344384.8|protein_coding||||||||||rs73635083|4833|-1||HGNC|HGNC:17186||5|A1|||0.0011|0.004|0|0|0|0|||||||||||||||||…	N	N	1.66	N	N	N
X	15319492	rs3434	T	C	T	C	0.360795	0.513692	0.420157	0.395561	0.139581	0.28626	0.623955	0.139581	N	N	N	N	N	N	N	N	N	N	N	N	N	CSQ=C|3_prime_UTR_variant|MODIFIER|PIGA|ENSG00000165195|Transcript|ENST00000333590.5|protein_coding|6/6||||3611|||||rs3434||-1||HGNC|HGNC:8957||1|P1|||0.3608|0.1396|0.2863|0.4202|0.3956|0.624|||||||||||||16219543|||||7.694|0.541279||,C|upstream_gene_variant|MODIFIER|ASB11|ENSG00000165192|Transcript|ENST00000344384.8|protein_coding||||||||||rs3434|4933|-1||HGNC|HGNC:17186||5|A1|||0.3608|0.1396|0.2…	N	N	7.694	N	N	N
X	15319522	.	T	C	T	C	0.0002649	0.513692	0	0.00130548	0	0	0	0	N	N	N	N	N	N	N	N	N	N	N	N	N	CSQ=C|3_prime_UTR_variant|MODIFIER|PIGA|ENSG00000165195|Transcript|ENST00000333590.5|protein_coding|6/6||||3581|||||rs765630620||-1||HGNC|HGNC:8957||1|P1|||0.0003|||||||||||||||||||||||5.506|0.318041||,C|upstream_gene_variant|MODIFIER|ASB11|ENSG00000165192|Transcript|ENST00000344384.8|protein_coding||||||||||rs765630620|4963|-1||HGNC|HGNC:17186||5|A1|||0.0003|||||||||||||||||||||||5.506|0.318041|…	N	N	5.506	N	N	N
X	15319548	.	A	G	A	G	0.00024108	0.486308	N	N	N	N	N	0.0003125	0	0.00290698	0	0	0	0	0	0	0	0	0	0	0	CSQ=G|3_prime_UTR_variant|MODIFIER|PIGA|ENSG00000165195|Transcript|ENST00000333590.5|protein_coding|6/6||||3555|||||||-1||HGNC|HGNC:8957||1|P1||||||||||||||||||||||||||6.276|0.389891||,G|upstream_gene_variant|MODIFIER|ASB11|ENSG00000165192|Transcript|ENST00000344384.8|protein_coding|||||||||||4989|-1||HGNC|HGNC:17186||5|A1||||||||||||||||||||||||||6.276|0.389891|0.868|,G|upstream_gene_variant|MOD…	N	N	6.276	N	N	N
X	15319551	.	T	C	T	C	0.00024108	0.486308	N	N	N	N	N	0.0003125	0.00414938	0	0	0	0	0	0	0	0	0	0	0	0	CSQ=C|3_prime_UTR_variant|MODIFIER|PIGA|ENSG00000165195|Transcript|ENST00000333590.5|protein_coding|6/6||||3552|||||||-1||HGNC|HGNC:8957||1|P1||||||||||||||||||||||||||0.593|-0.185283||,C|upstream_gene_variant|MODIFIER|ASB11|ENSG00000165192|Transcript|ENST00000344384.8|protein_coding|||||||||||4992|-1||HGNC|HGNC:17186||5|A1||||||||||||||||||||||||||0.593|-0.185283|0.868|,C|upstream_gene_variant|M…	N	N	0.593	N	N	N
X	15319559	.	A	C	A	C	0.0002649	0.513692	0.0013089	0	0	0	0	0	N	N	N	N	N	N	N	N	N	N	N	N	N	CSQ=C|3_prime_UTR_variant|MODIFIER|PIGA|ENSG00000165195|Transcript|ENST00000333590.5|protein_coding|6/6||||3544|||||rs775827251||-1||HGNC|HGNC:8957||1|P1|||0.0003|||||||||||||||||||||||2.324|0.058417||,C|upstream_gene_variant|MODIFIER|ASB11|ENSG00000165192|Transcript|ENST00000344384.8|protein_coding||||||||||rs775827251|5000|-1||HGNC|HGNC:17186||5|A1|||0.0003|||||||||||||||||||||||2.324|0.058417|…	N	N	2.324	N	N	N
X	15319613	.	A	G	A	G	0.0007947	0.513692	0.0039267	0	0	0	0	0	N	N	N	N	N	N	N	N	N	N	N	N	N	CSQ=G|3_prime_UTR_variant|MODIFIER|PIGA|ENSG00000165195|Transcript|ENST00000333590.5|protein_coding|6/6||||3490|||||rs763505541||-1||HGNC|HGNC:8957||1|P1|||0.0008|||||||||||||||||||||||6.035|0.366553||,G|upstream_gene_variant|MODIFIER|ASB11|ENSG00000165192|Transcript|ENST00000380470.7|protein_coding||||||||||rs763505541|3989|-1||HGNC|HGNC:17186||1||||0.0008|||||||||||||||||||||||6.035|0.366553|0.…	N	N	6.035	N	N	N
X	15319674	rs184041443	T	A	T	A	0.0005298	0.513692	0.0026178	0	0	0	0	0	N	N	N	N	N	N	N	N	N	N	N	N	N	CSQ=A|3_prime_UTR_variant|MODIFIER|PIGA|ENSG00000165195|Transcript|ENST00000333590.5|protein_coding|6/6||||3429|||||rs184041443||-1||HGNC|HGNC:8957||1|P1|||0.0005|0|0|0.0026|0|0||||||||||||||||||12.41|1.024447||,A|upstream_gene_variant|MODIFIER|ASB11|ENSG00000165192|Transcript|ENST00000380470.7|protein_coding||||||||||rs184041443|4050|-1||HGNC|HGNC:17186||1||||0.0005|0|0|0.0026|0|0|||||||||||||||…	N	N	12.41	N	N	N
X	15319727	rs11448948	T	TA	T	T	0.272903	0.486308	N	N	N	N	N	0.2775	0.348548	0.244186	0.254902	0.425926	0.0578512	0.158537	0.464578	0.0703625	0.236842	0.332068	0.150628	0.234483	0.188679	CSQ=A|3_prime_UTR_variant|MODIFIER|PIGA|ENSG00000165195|Transcript|ENST00000333590.5|protein_coding|6/6||||3375-3376|||||rs11448948||-1||HGNC|HGNC:8957||1|P1||||0.7318|0.3874|0.4319|0.4856|0.7577||||||||||||||||||1.059|-0.090995||,A|upstream_gene_variant|MODIFIER|ASB11|ENSG00000165192|Transcript|ENST00000380470.7|protein_coding||||||||||rs11448948|4103|-1||HGNC|HGNC:17186||1|||||0.7318|0.3874|0.4…	N	N	1.059	N	N	N
X	15319760	rs3087965	A	T	A	T	0.290168	0	0.420157	0.395561	0.197408	0.293893	0.635097	0.199857	0.240664	0.15407	0.176471	0.222222	0.322314	0.182927	0.257493	0.0383795	0.263158	0.203036	0.251046	0.262069	0.301887	CSQ=T|3_prime_UTR_variant|MODIFIER|PIGA|ENSG00000165195|Transcript|ENST00000333590.5|protein_coding|6/6||||3343|||||rs3087965||-1||HGNC|HGNC:8957||1|P1|||0.3793|0.1974|0.2939|0.4202|0.3956|0.6351|||||||||||||16219543|||||0.699|-0.159518||,T|upstream_gene_variant|MODIFIER|ASB11|ENSG00000165192|Transcript|ENST00000380470.7|protein_coding||||||||||rs3087965|4136|-1||HGNC|HGNC:17186||1||||0.3793|0.19…	N	N	0.699	N	N	N
X	15319880	rs3661	A	G	G	G	0.355673	0	0.420157	0.400783	0.32004	0.301527	0.637883	0.291696	0.327801	0.22093	0.294118	0.296296	0.355372	0.231707	0.333787	0.149254	0.342105	0.212524	0.41841	0.448276	0.415094	CSQ=G|3_prime_UTR_variant|MODIFIER|PIGA|ENSG00000165195|Transcript|ENST00000333590.5|protein_coding|6/6||||3223|||||rs3661||-1||HGNC|HGNC:8957||1|P1|||0.4146|0.32|0.3015|0.4202|0.4008|0.6379|||||||||||||16219543|||||1.828|0.008483||,G|upstream_gene_variant|MODIFIER|ASB11|ENSG00000165192|Transcript|ENST00000380470.7|protein_coding||||||||||rs3661|4256|-1||HGNC|HGNC:17186||1||||0.4146|0.32|0.3015|0…	N	N	1.828	N	N	N
X	15319910	.	G	A	G	A	0.00192864	0.486308	N	N	N	N	N	0.0021875	0	0	0	0	0.0495868	0.0121951	0	0	0	0	0	0	0	CSQ=A|3_prime_UTR_variant|MODIFIER|PIGA|ENSG00000165195|Transcript|ENST00000333590.5|protein_coding|6/6||||3193|||||||-1||HGNC|HGNC:8957||1|P1||||||||||||||||||||||||||1.408|-0.041028||,A|upstream_gene_variant|MODIFIER|ASB11|ENSG00000165192|Transcript|ENST00000380470.7|protein_coding|||||||||||4286|-1||HGNC|HGNC:17186||1|||||||||||||||||||||||||||1.408|-0.041028|0.868|,A|downstream_gene_variant|M…	N	N	1.408	N	N	N
X	15319982	.	T	C	T	C	0.0002649	0.513692	0	0	0	0	0.00139276	0	N	N	N	N	N	N	N	N	N	N	N	N	N	CSQ=C|3_prime_UTR_variant|MODIFIER|PIGA|ENSG00000165195|Transcript|ENST00000333590.5|protein_coding|6/6||||3121|||||rs756332722||-1||HGNC|HGNC:8957||1|P1|||0.0003|||||||||||||||||||||||9.599|0.765548||,C|upstream_gene_variant|MODIFIER|ASB11|ENSG00000165192|Transcript|ENST00000380470.7|protein_coding||||||||||rs756332722|4358|-1||HGNC|HGNC:17186||1||||0.0003|||||||||||||||||||||||9.599|0.765548|0.…	N	N	9.599	N	N	N
X	15319988	.	T	C	T	C	0.00048216	0.486308	N	N	N	N	N	0.000625	0.00829876	0	0	0	0	0	0	0	0	0	0	0	0	CSQ=C|3_prime_UTR_variant|MODIFIER|PIGA|ENSG00000165195|Transcript|ENST00000333590.5|protein_coding|6/6||||3115|||||||-1||HGNC|HGNC:8957||1|P1||||||||||||||||||||||||||9.133|0.712826||,C|upstream_gene_variant|MODIFIER|ASB11|ENSG00000165192|Transcript|ENST00000380470.7|protein_coding|||||||||||4364|-1||HGNC|HGNC:17186||1|||||||||||||||||||||||||||9.133|0.712826|0.868|,C|downstream_gene_variant|MOD…	N	N	9.133	N	N	N
X	15320009	.	ATAGTT	A	A	A	0.00072324	0.486308	N	N	N	N	N	0.0009375	0	0	0.0196078	0	0	0	0	0	0	0	0	0	0	CSQ=-|3_prime_UTR_variant|MODIFIER|PIGA|ENSG00000165195|Transcript|ENST00000333590.5|protein_coding|6/6||||3089-3093|||||rs1379554129||-1||HGNC|HGNC:8957||1|P1||||||||||||||||||||||||||3.110|0.126086||,-|upstream_gene_variant|MODIFIER|ASB11|ENSG00000165192|Transcript|ENST00000380470.7|protein_coding||||||||||rs1379554129|4386|-1||HGNC|HGNC:17186||1|||||||||||||||||||||||||||3.110|0.126086|0.868|,…	N	N	3.11	N	N	N
X	15320085	.	G	A	G	A	0.0002649	0.513692	0	0	0	0.0019084	0	0	N	N	N	N	N	N	N	N	N	N	N	N	N	CSQ=A|3_prime_UTR_variant|MODIFIER|PIGA|ENSG00000165195|Transcript|ENST00000333590.5|protein_coding|6/6||||3018|||||rs780064238||-1||HGNC|HGNC:8957||1|P1|||0.0003|||||||||||||||||||||||7.661|0.537482||,A|upstream_gene_variant|MODIFIER|ASB11|ENSG00000165192|Transcript|ENST00000380470.7|protein_coding||||||||||rs780064238|4461|-1||HGNC|HGNC:17186||1||||0.0003|||||||||||||||||||||||7.661|0.537482|0.…	N	N	7.661	N	N	N
X	15320088	.	T	C	T	C	0.0002649	0.513692	0	0	0.00099701	0	0	0.00099701	N	N	N	N	N	N	N	N	N	N	N	N	N	CSQ=C|3_prime_UTR_variant|MODIFIER|PIGA|ENSG00000165195|Transcript|ENST00000333590.5|protein_coding|6/6||||3015|||||rs749082199||-1||HGNC|HGNC:8957||1|P1|||0.0003|||||||||||||||||||||||7.143|0.479650||,C|upstream_gene_variant|MODIFIER|ASB11|ENSG00000165192|Transcript|ENST00000380470.7|protein_coding||||||||||rs749082199|4464|-1||HGNC|HGNC:17186||1||||0.0003|||||||||||||||||||||||7.143|0.479650|0.…	N	N	7.143	N	N	N
X	15320149	.	T	A	T	A	0.0012054	0.486308	N	N	N	N	N	0.0003125	0	0.00290698	0	0	0	0	0	0	0	0	0	0	0	CSQ=A|3_prime_UTR_variant|MODIFIER|PIGA|ENSG00000165195|Transcript|ENST00000333590.5|protein_coding|6/6||||2954|||||rs899327140||-1||HGNC|HGNC:8957||1|P1||||||||||||||||||||||||||14.35|1.275773||,A|upstream_gene_variant|MODIFIER|ASB11|ENSG00000165192|Transcript|ENST00000380470.7|protein_coding||||||||||rs899327140|4525|-1||HGNC|HGNC:17186||1|||||||||||||||||||||||||||14.35|1.275773|0.868|,A|downs…	N	N	14.35	N	N	N
X	15320150	.	G	C	G	C	0.00144648	0.486308	N	N	N	N	N	0.00125	0.0124481	0	0.00653595	0	0	0	0	0	0	0	0	0	0	CSQ=C|3_prime_UTR_variant|MODIFIER|PIGA|ENSG00000165195|Transcript|ENST00000333590.5|protein_coding|6/6||||2953|||||||-1||HGNC|HGNC:8957||1|P1||||||||||||||||||||||||||13.84|1.196939||,C|upstream_gene_variant|MODIFIER|ASB11|ENSG00000165192|Transcript|ENST00000380470.7|protein_coding|||||||||||4526|-1||HGNC|HGNC:17186||1|||||||||||||||||||||||||||13.84|1.196939|0.868|,C|downstream_gene_variant|MOD…	N	N	13.84	N	N	N
X	15320182	.	T	C	T	C	0.00024108	0.486308	N	N	N	N	N	0.0003125	0	0	0	0	0	0	0.0013624	0	0	0	0	0	0	CSQ=C|3_prime_UTR_variant|MODIFIER|PIGA|ENSG00000165195|Transcript|ENST00000333590.5|protein_coding|6/6||||2921|||||||-1||HGNC|HGNC:8957||1|P1||||||||||||||||||||||||||5.812|0.345752||,C|upstream_gene_variant|MODIFIER|ASB11|ENSG00000165192|Transcript|ENST00000380470.7|protein_coding|||||||||||4558|-1||HGNC|HGNC:17186||1|||||||||||||||||||||||||||5.812|0.345752|0.868|,C|downstream_gene_variant|MOD…	N	N	5.812	N	N	N
X	15320184	.	T	C	T	C	0.0002649	0.513692	0	0	0	0	0.00139276	0	N	N	N	N	N	N	N	N	N	N	N	N	N	CSQ=C|3_prime_UTR_variant|MODIFIER|PIGA|ENSG00000165195|Transcript|ENST00000333590.5|protein_coding|6/6||||2919|||||rs754979626||-1||HGNC|HGNC:8957||1|P1|||0.0003|||||||||||||||||||||||2.581|0.081794||,C|upstream_gene_variant|MODIFIER|ASB11|ENSG00000165192|Transcript|ENST00000380470.7|protein_coding||||||||||rs754979626|4560|-1||HGNC|HGNC:17186||1||||0.0003|||||||||||||||||||||||2.581|0.081794|0.…	N	N	2.581	N	N	N
X	15320268	.	TCA	T	T	T	0.00072324	0.486308	N	N	N	N	N	0.000625	0	0	0	0	0.0165289	0	0	0	0	0	0	0	0	CSQ=-|3_prime_UTR_variant|MODIFIER|PIGA|ENSG00000165195|Transcript|ENST00000333590.5|protein_coding|6/6||||2833-2834|||||rs1289628521||-1||HGNC|HGNC:8957||1|P1||||||||||||||||||||||||||7.218|0.487811||,-|upstream_gene_variant|MODIFIER|ASB11|ENSG00000165192|Transcript|ENST00000380470.7|protein_coding||||||||||rs1289628521|4645|-1||HGNC|HGNC:17186||1|||||||||||||||||||||||||||7.218|0.487811|0.868|,…	N	N	7.218	N	N	N
X	15320340	.	G	T	G	T	0.00024108	0.486308	N	N	N	N	N	0.0003125	0.00414938	0	0	0	0	0	0	0	0	0	0	0	0	CSQ=T|3_prime_UTR_variant|MODIFIER|PIGA|ENSG00000165195|Transcript|ENST00000333590.5|protein_coding|6/6||||2763|||||||-1||HGNC|HGNC:8957||1|P1||||||||||||||||||||||||||17.86|1.867287||,T|upstream_gene_variant|MODIFIER|ASB11|ENSG00000165192|Transcript|ENST00000380470.7|protein_coding|||||||||||4716|-1||HGNC|HGNC:17186||1|||||||||||||||||||||||||||17.86|1.867287|0.868|,T|downstream_gene_variant|MOD…	N	N	17.86	N	N	N
X	15320342	.	T	TA	T	TA	0.0002649	0.513692	0	0	0	0.0019084	0	0	N	N	N	N	N	N	N	N	N	N	N	N	N	CSQ=A|3_prime_UTR_variant|MODIFIER|PIGA|ENSG00000165195|Transcript|ENST00000333590.5|protein_coding|6/6||||2760-2761|||||rs778929951||-1||HGNC|HGNC:8957||1|P1|||||||||||||||||||||||||||||,A|upstream_gene_variant|MODIFIER|ASB11|ENSG00000165192|Transcript|ENST00000380470.7|protein_coding||||||||||rs778929951|4718|-1||HGNC|HGNC:17186||1|||||||||||||||||||||||||||||0.868|,A|downstream_gene_variant|MO…	N	N	N	N	N	N
X	15320392	.	C	A	C	A	0.00024108	0.486308	N	N	N	N	N	0.0003125	0	0.00290698	0	0	0	0	0	0	0	0	0	0	0	CSQ=A|3_prime_UTR_variant|MODIFIER|PIGA|ENSG00000165195|Transcript|ENST00000333590.5|protein_coding|6/6||||2711|||||||-1||HGNC|HGNC:8957||1|P1||||||||||||||||||||||||||3.020|0.118828||,A|upstream_gene_variant|MODIFIER|ASB11|ENSG00000165192|Transcript|ENST00000380470.7|protein_coding|||||||||||4768|-1||HGNC|HGNC:17186||1|||||||||||||||||||||||||||3.020|0.118828|0.868|,A|downstream_gene_variant|MOD…	N	N	3.02	N	N	N
X	15320411	.	A	C	A	C	0.0005298	0.513692	0	0	0	0	0.00278552	0	N	N	N	N	N	N	N	N	N	N	N	N	N	CSQ=C|3_prime_UTR_variant|MODIFIER|PIGA|ENSG00000165195|Transcript|ENST00000333590.5|protein_coding|6/6||||2692|||||rs747726050||-1||HGNC|HGNC:8957||1|P1|||0.0005|||||||||||||||||||||||4.395|0.225855||,C|upstream_gene_variant|MODIFIER|ASB11|ENSG00000165192|Transcript|ENST00000380470.7|protein_coding||||||||||rs747726050|4787|-1||HGNC|HGNC:17186||1||||0.0005|||||||||||||||||||||||4.395|0.225855|0.…	N	N	4.395	N	N	N
X	15320424	.	G	C	G	C	0.00265188	0.486308	N	N	N	N	N	0.0028125	0.00414938	0.00581395	0.0130719	0.0185185	0.0165289	0	0.0013624	0	0	0	0	0	0	CSQ=C|3_prime_UTR_variant|MODIFIER|PIGA|ENSG00000165195|Transcript|ENST00000333590.5|protein_coding|6/6||||2679|||||rs988722667||-1||HGNC|HGNC:8957||1|P1||||||||||||||||||||||||||7.192|0.485050||,C|upstream_gene_variant|MODIFIER|ASB11|ENSG00000165192|Transcript|ENST00000380470.7|protein_coding||||||||||rs988722667|4800|-1||HGNC|HGNC:17186||1|||||||||||||||||||||||||||7.192|0.485050|0.868|,C|downs…	N	N	7.192	N	N	N
X	15320443	.	T	C	T	C	0.0002649	0.513692	0	0	0.00099701	0	0	0.00099701	N	N	N	N	N	N	N	N	N	N	N	N	N	CSQ=C|3_prime_UTR_variant|MODIFIER|PIGA|ENSG00000165195|Transcript|ENST00000333590.5|protein_coding|6/6||||2660|||||rs771529477||-1||HGNC|HGNC:8957||1|P1|||0.0003|||||||||||||||||||||||8.281|0.610281||,C|upstream_gene_variant|MODIFIER|ASB11|ENSG00000165192|Transcript|ENST00000380470.7|protein_coding||||||||||rs771529477|4819|-1||HGNC|HGNC:17186||1||||0.0003|||||||||||||||||||||||8.281|0.610281|0.…	N	N	8.281	N	N	N
X	15320518	.	A	T	A	T	0.0002649	0.513692	0	0	0	0	0.00139276	0	N	N	N	N	N	N	N	N	N	N	N	N	N	CSQ=T|3_prime_UTR_variant|MODIFIER|PIGA|ENSG00000165195|Transcript|ENST00000333590.5|protein_coding|6/6||||2585|||||rs772745563||-1||HGNC|HGNC:8957||1|P1|||0.0003|||||||||||||||||||||||4.474|0.232039||,T|upstream_gene_variant|MODIFIER|ASB11|ENSG00000165192|Transcript|ENST00000380470.7|protein_coding||||||||||rs772745563|4894|-1||HGNC|HGNC:17186||1||||0.0003|||||||||||||||||||||||4.474|0.232039|0.…	N	N	4.474	N	N	N
X	15320552	.	A	G	A	G	0.0002649	0.513692	0.0013089	0	0	0	0	0	N	N	N	N	N	N	N	N	N	N	N	N	N	CSQ=G|3_prime_UTR_variant|MODIFIER|PIGA|ENSG00000165195|Transcript|ENST00000333590.5|protein_coding|6/6||||2551|||||rs746705485||-1||HGNC|HGNC:8957||1|P1|||0.0003|||||||||||||||||||||||18.51|1.969353||,G|upstream_gene_variant|MODIFIER|ASB11|ENSG00000165192|Transcript|ENST00000380470.7|protein_coding||||||||||rs746705485|4928|-1||HGNC|HGNC:17186||1||||0.0003|||||||||||||||||||||||18.51|1.969353|0.…	N	N	18.51	N	N	N
X	15320564	.	G	A	G	A	0.00211921	0.513692	0	0.00261097	0	0	0.00835655	0	N	N	N	N	N	N	N	N	N	N	N	N	N	CSQ=A|3_prime_UTR_variant|MODIFIER|PIGA|ENSG00000165195|Transcript|ENST00000333590.5|protein_coding|6/6||||2539|||||rs770553764||-1||HGNC|HGNC:8957||1|P1|||0.0021|||||||||||||||||||||||0.012|-0.686453||,A|upstream_gene_variant|MODIFIER|ASB11|ENSG00000165192|Transcript|ENST00000380470.7|protein_coding||||||||||rs770553764|4940|-1||HGNC|HGNC:17186||1||||0.0021|||||||||||||||||||||||0.012|-0.686453|…	N	N	0.012	N	N	N
X	15320589	rs188058821	G	A	G	A	0.0018543	0.513692	0	0.00913838	0	0	0	0	N	N	N	N	N	N	N	N	N	N	N	N	N	CSQ=A|3_prime_UTR_variant|MODIFIER|PIGA|ENSG00000165195|Transcript|ENST00000333590.5|protein_coding|6/6||||2514|||||rs188058821||-1||HGNC|HGNC:8957||1|P1|||0.0019|0|0|0|0.0091|0||||||||||||||||||15.28|1.427700||,A|upstream_gene_variant|MODIFIER|ASB11|ENSG00000165192|Transcript|ENST00000380470.7|protein_coding||||||||||rs188058821|4965|-1||HGNC|HGNC:17186||1||||0.0019|0|0|0|0.0091|0|||||||||||||||…	N	N	15.28	N	N	N
X	15320626	rs73189542	T	C	T	C	0.0002649	0.513692	0	0.00130548	0	0	0	0	N	N	N	N	N	N	N	N	N	N	N	N	N	CSQ=C|3_prime_UTR_variant|MODIFIER|PIGA|ENSG00000165195|Transcript|ENST00000333590.5|protein_coding|6/6||||2477|||||rs73189542||-1||HGNC|HGNC:8957||1|P1|||0.0003|0|0|0|0.0013|0||||||||||||||||||7.727|0.545049||,C|downstream_gene_variant|MODIFIER|PIGA|ENSG00000165195|Transcript|ENST00000463173.1|retained_intron||||||||||rs73189542|1087|-1||HGNC|HGNC:8957||3||||0.0003|0|0|0|0.0013|0||||||||||||||||…	N	N	7.727	N	N	N
X	15320644	.	T	C	T	C	0.00048216	0.486308	N	N	N	N	N	0	0	0	0	0	0	0	0	0	0	0	0	0	0	CSQ=C|3_prime_UTR_variant|MODIFIER|PIGA|ENSG00000165195|Transcript|ENST00000333590.5|protein_coding|6/6||||2459|||||||-1||HGNC|HGNC:8957||1|P1||||||||||||||||||||||||||9.524|0.757495||,C|downstream_gene_variant|MODIFIER|PIGA|ENSG00000165195|Transcript|ENST00000463173.1|retained_intron|||||||||||1069|-1||HGNC|HGNC:8957||3|||||||||||||||||||||||||||9.524|0.757495||,C|downstream_gene_variant|MODIFIE…	N	N	9.524	N	N	N
X	15320648	.	A	G	A	G	0.0012054	0.486308	N	N	N	N	N	0.0015625	0	0	0	0.0185185	0	0	0.00544959	0	0	0	0	0	0	CSQ=G|3_prime_UTR_variant|MODIFIER|PIGA|ENSG00000165195|Transcript|ENST00000333590.5|protein_coding|6/6||||2455|||||||-1||HGNC|HGNC:8957||1|P1||||||||||||||||||||||||||18.64|1.988884||,G|downstream_gene_variant|MODIFIER|PIGA|ENSG00000165195|Transcript|ENST00000463173.1|retained_intron|||||||||||1065|-1||HGNC|HGNC:8957||3|||||||||||||||||||||||||||18.64|1.988884||,G|downstream_gene_variant|MODIFIE…	N	N	18.64	N	N	N
X	15320659	rs190545953	C	T	C	T	0.00264901	0.513692	0	0.00913838	0	0.0019084	0.00278552	0	N	N	N	N	N	N	N	N	N	N	N	N	N	CSQ=T|3_prime_UTR_variant|MODIFIER|PIGA|ENSG00000165195|Transcript|ENST00000333590.5|protein_coding|6/6||||2444|||||rs190545953||-1||HGNC|HGNC:8957||1|P1|||0.0026|0|0.0019|0|0.0091|0.0028||||||||||||||||||14.82|1.350677||,T|downstream_gene_variant|MODIFIER|PIGA|ENSG00000165195|Transcript|ENST00000463173.1|retained_intron||||||||||rs190545953|1054|-1||HGNC|HGNC:8957||3||||0.0026|0|0.0019|0|0.0091|…	N	N	14.82	N	N	N
X	15320742	rs183106783	A	T	A	T	0.00238411	0.513692	0	0	0	0.0171756	0	0	N	N	N	N	N	N	N	N	N	N	N	N	N	CSQ=T|3_prime_UTR_variant|MODIFIER|PIGA|ENSG00000165195|Transcript|ENST00000333590.5|protein_coding|6/6||||2361|||||rs183106783||-1||HGNC|HGNC:8957||1|P1|||0.0024|0|0.0172|0|0|0||||||||||||||||||2.356|0.061406||,T|downstream_gene_variant|MODIFIER|PIGA|ENSG00000165195|Transcript|ENST00000463173.1|retained_intron||||||||||rs183106783|971|-1||HGNC|HGNC:8957||3||||0.0024|0|0.0172|0|0|0|||||||||||||||…	N	N	2.356	N	N	N
X	15320751	rs187040067	G	A	G	A	0.0005298	0.513692	0.0013089	0	0.00099701	0	0	0.00099701	N	N	N	N	N	N	N	N	N	N	N	N	N	CSQ=A|3_prime_UTR_variant|MODIFIER|PIGA|ENSG00000165195|Transcript|ENST00000333590.5|protein_coding|6/6||||2352|||||rs187040067||-1||HGNC|HGNC:8957||1|P1|||0.0005|0.001|0|0.0013|0|0||||||||||||||||||4.809|0.258909||,A|downstream_gene_variant|MODIFIER|PIGA|ENSG00000165195|Transcript|ENST00000463173.1|retained_intron||||||||||rs187040067|962|-1||HGNC|HGNC:8957||3||||0.0005|0.001|0|0.0013|0|0|||||||…	N	N	4.809	N	N	N
X	15320767	.	G	A	G	A	0.0002649	0.513692	0	0	0.00099701	0	0	0.00099701	N	N	N	N	N	N	N	N	N	N	N	N	N	CSQ=A|3_prime_UTR_variant|MODIFIER|PIGA|ENSG00000165195|Transcript|ENST00000333590.5|protein_coding|6/6||||2336|||||rs767538745||-1||HGNC|HGNC:8957||1|P1|||0.0003|||||||||||||||||||||||0.129|-0.390708||,A|downstream_gene_variant|MODIFIER|PIGA|ENSG00000165195|Transcript|ENST00000463173.1|retained_intron||||||||||rs767538745|946|-1||HGNC|HGNC:8957||3||||0.0003|||||||||||||||||||||||0.129|-0.390708|…	N	N	0.129	N	N	N
X	15320822	.	G	A	G	A	0.00048216	0.486308	N	N	N	N	N	0.000625	0	0	0	0	0	0	0.0027248	0	0	0	0	0	0	CSQ=A|3_prime_UTR_variant|MODIFIER|PIGA|ENSG00000165195|Transcript|ENST00000333590.5|protein_coding|6/6||||2281|||||||-1||HGNC|HGNC:8957||1|P1||||||||||||||||||||||||||0.272|-0.295445||,A|downstream_gene_variant|MODIFIER|PIGA|ENSG00000165195|Transcript|ENST00000463173.1|retained_intron|||||||||||891|-1||HGNC|HGNC:8957||3|||||||||||||||||||||||||||0.272|-0.295445||,A|downstream_gene_variant|MODIFI…	N	N	0.272	N	N	N
X	15320847	.	T	C	T	C	0.00024108	0.486308	N	N	N	N	N	0	0	0	0	0	0	0	0	0	0	0	0	0	0	CSQ=C|3_prime_UTR_variant|MODIFIER|PIGA|ENSG00000165195|Transcript|ENST00000333590.5|protein_coding|6/6||||2256|||||rs992870796||-1||HGNC|HGNC:8957||1|P1||||||||||||||||||||||||||1.127|-0.080408||,C|downstream_gene_variant|MODIFIER|PIGA|ENSG00000165195|Transcript|ENST00000463173.1|retained_intron||||||||||rs992870796|866|-1||HGNC|HGNC:8957||3|||||||||||||||||||||||||||1.127|-0.080408||,C|downstre…	N	N	1.127	N	N	N
X	15320904	.	C	T	C	T	0.0002649	0.513692	0	0.00130548	0	0	0	0	N	N	N	N	N	N	N	N	N	N	N	N	N	CSQ=T|3_prime_UTR_variant|MODIFIER|PIGA|ENSG00000165195|Transcript|ENST00000333590.5|protein_coding|6/6||||2199|||||rs750515462||-1||HGNC|HGNC:8957||1|P1|||0.0003|||||||||||||||||||||||2.646|0.087493||,T|downstream_gene_variant|MODIFIER|PIGA|ENSG00000165195|Transcript|ENST00000463173.1|retained_intron||||||||||rs750515462|809|-1||HGNC|HGNC:8957||3||||0.0003|||||||||||||||||||||||2.646|0.087493||,…	N	N	2.646	N	N	N
X	15320991	.	T	TA	T	TA	0.00024108	0.486308	N	N	N	N	N	0	0	0	0	0	0	0	0	0	0	0	0	0	0	CSQ=A|3_prime_UTR_variant|MODIFIER|PIGA|ENSG00000165195|Transcript|ENST00000333590.5|protein_coding|6/6||||2111-2112|||||rs1401722640||-1||HGNC|HGNC:8957||1|P1||||||||||||||||||||||||||3.350|0.145075||,A|downstream_gene_variant|MODIFIER|PIGA|ENSG00000165195|Transcript|ENST00000463173.1|retained_intron||||||||||rs1401722640|721|-1||HGNC|HGNC:8957||3|||||||||||||||||||||||||||3.350|0.145075||,A|dow…	N	N	3.35	N	N	N
X	15321014	.	G	T	G	T	0.00072324	0.486308	N	N	N	N	N	0.0009375	0.0124481	0	0	0	0	0	0	0	0	0	0	0	0	CSQ=T|3_prime_UTR_variant|MODIFIER|PIGA|ENSG00000165195|Transcript|ENST00000333590.5|protein_coding|6/6||||2089|||||||-1||HGNC|HGNC:8957||1|P1||||||||||||||||||||||||||7.756|0.548450||,T|downstream_gene_variant|MODIFIER|PIGA|ENSG00000165195|Transcript|ENST00000463173.1|retained_intron|||||||||||699|-1||HGNC|HGNC:8957||3|||||||||||||||||||||||||||7.756|0.548450||,T|downstream_gene_variant|MODIFIER…	N	N	7.756	N	N	N
X	15321025	.	A	C	A	C	0.0002649	0.513692	0	0	0.00099701	0	0	0.00099701	N	N	N	N	N	N	N	N	N	N	N	N	N	CSQ=C|3_prime_UTR_variant|MODIFIER|PIGA|ENSG00000165195|Transcript|ENST00000333590.5|protein_coding|6/6||||2078|||||rs756463073||-1||HGNC|HGNC:8957||1|P1|||0.0003|||||||||||||||||||||||5.840|0.348311||,C|downstream_gene_variant|MODIFIER|PIGA|ENSG00000165195|Transcript|ENST00000463173.1|retained_intron||||||||||rs756463073|688|-1||HGNC|HGNC:8957||3||||0.0003|||||||||||||||||||||||5.840|0.348311||,…	N	N	5.84	N	N	N
X	15321067	.	G	T	G	T	0.0002649	0.513692	0	0	0.00099701	0	0	0.00099701	N	N	N	N	N	N	N	N	N	N	N	N	N	CSQ=T|3_prime_UTR_variant|MODIFIER|PIGA|ENSG00000165195|Transcript|ENST00000333590.5|protein_coding|6/6||||2036|||||rs766651571||-1||HGNC|HGNC:8957||1|P1|||0.0003|||||||||||||||||||||||8.699|0.660555||,T|downstream_gene_variant|MODIFIER|PIGA|ENSG00000165195|Transcript|ENST00000463173.1|retained_intron||||||||||rs766651571|646|-1||HGNC|HGNC:8957||3||||0.0003|||||||||||||||||||||||8.699|0.660555||,…	N	N	8.699	N	N	N
X	15321109	.	T	C	T	C	0.00048216	0.486308	N	N	N	N	N	0.000625	0	0	0	0	0	0	0.0027248	0	0	0	0	0	0	CSQ=C|3_prime_UTR_variant|MODIFIER|PIGA|ENSG00000165195|Transcript|ENST00000333590.5|protein_coding|6/6||||1994|||||||-1||HGNC|HGNC:8957||1|P1||||||||||||||||||||||||||13.49|1.148143||,C|downstream_gene_variant|MODIFIER|PIGA|ENSG00000165195|Transcript|ENST00000463173.1|retained_intron|||||||||||604|-1||HGNC|HGNC:8957||3|||||||||||||||||||||||||||13.49|1.148143||,C|downstream_gene_variant|MODIFIER…	N	N	13.49	N	N	N
X	15321137	.	T	C	T	C	0.00024108	0.486308	N	N	N	N	N	0.0003125	0	0	0	0	0	0	0.0013624	0	0	0	0	0	0	CSQ=C|3_prime_UTR_variant|MODIFIER|PIGA|ENSG00000165195|Transcript|ENST00000333590.5|protein_coding|6/6||||1966|||||||-1||HGNC|HGNC:8957||1|P1||||||||||||||||||||||||||13.78|1.188511||,C|downstream_gene_variant|MODIFIER|PIGA|ENSG00000165195|Transcript|ENST00000463173.1|retained_intron|||||||||||576|-1||HGNC|HGNC:8957||3|||||||||||||||||||||||||||13.78|1.188511||,C|downstream_gene_variant|MODIFIER…	N	N	13.78	N	N	N
X	15321144	.	T	C	T	C	0.00216972	0.486308	N	N	N	N	N	0.0025	0	0	0	0	0.0578512	0.0121951	0	0	0	0	0	0	0	CSQ=C|3_prime_UTR_variant|MODIFIER|PIGA|ENSG00000165195|Transcript|ENST00000333590.5|protein_coding|6/6||||1959|||||rs573699741||-1||HGNC|HGNC:8957||1|P1||||||||||||||||||||||||||11.88|0.978561||,C|downstream_gene_variant|MODIFIER|PIGA|ENSG00000165195|Transcript|ENST00000463173.1|retained_intron||||||||||rs573699741|569|-1||HGNC|HGNC:8957||3|||||||||||||||||||||||||||11.88|0.978561||,C|downstream…	N	N	11.88	N	N	N
X	15321162	.	T	C	T	C	0.00048216	0.486308	N	N	N	N	N	0.000625	0	0	0	0	0.0165289	0	0	0	0	0	0	0	0	CSQ=C|3_prime_UTR_variant|MODIFIER|PIGA|ENSG00000165195|Transcript|ENST00000333590.5|protein_coding|6/6||||1941|||||||-1||HGNC|HGNC:8957||1|P1||||||||||||||||||||||||||9.725|0.778978||,C|downstream_gene_variant|MODIFIER|PIGA|ENSG00000165195|Transcript|ENST00000463173.1|retained_intron|||||||||||551|-1||HGNC|HGNC:8957||3|||||||||||||||||||||||||||9.725|0.778978||,C|downstream_gene_variant|MODIFIER…	N	N	9.725	N	N	N
X	15321185	.	G	A	G	A	0.00024108	0.486308	N	N	N	N	N	0.0003125	0	0	0.00653595	0	0	0	0	0	0	0	0	0	0	CSQ=A|3_prime_UTR_variant|MODIFIER|PIGA|ENSG00000165195|Transcript|ENST00000333590.5|protein_coding|6/6||||1918|||||rs1230987656||-1||HGNC|HGNC:8957||1|P1||||||||||||||||||||||||||5.206|0.291963||,A|downstream_gene_variant|MODIFIER|PIGA|ENSG00000165195|Transcript|ENST00000463173.1|retained_intron||||||||||rs1230987656|528|-1||HGNC|HGNC:8957||3|||||||||||||||||||||||||||5.206|0.291963||,A|downstre…	N	N	5.206	N	N	N
X	15321217	.	TATA	T	T	T	0.00732046	0	0	0	0.0259222	0.0019084	0	0.00880324	0	0.0174419	0	0	0	0	0.0013624	0.00639659	0	0	0.0041841	0	0	CSQ=-|3_prime_UTR_variant|MODIFIER|PIGA|ENSG00000165195|Transcript|ENST00000333590.5|protein_coding|6/6||||1883-1885|||||rs753691551||-1||HGNC|HGNC:8957||1|P1||||||||||||||||||||||||||15.80|1.516488||,-|downstream_gene_variant|MODIFIER|PIGA|ENSG00000165195|Transcript|ENST00000463173.1|retained_intron||||||||||rs753691551|493|-1||HGNC|HGNC:8957||3|||||||||||||||||||||||||||15.80|1.516488||,-|downs…	N	N	15.8	N	N	N
X	15321265	.	T	C	T	C	0.00096432	0.486308	N	N	N	N	N	0.000625	0.00829876	0	0	0	0	0	0	0	0	0	0	0	0	CSQ=C|3_prime_UTR_variant|MODIFIER|PIGA|ENSG00000165195|Transcript|ENST00000333590.5|protein_coding|6/6||||1838|||||rs745960092||-1||HGNC|HGNC:8957||1|P1||||||||||||||||||||||||||5.658|0.331680||,C|downstream_gene_variant|MODIFIER|PIGA|ENSG00000165195|Transcript|ENST00000463173.1|retained_intron||||||||||rs745960092|448|-1||HGNC|HGNC:8957||3|||||||||||||||||||||||||||5.658|0.331680||,C|downstream…	N	N	5.658	N	N	N
X	15321281	.	C	T	C	T	0.00024108	0.486308	N	N	N	N	N	0	0	0	0	0	0	0	0	0	0	0	0	0	0	CSQ=T|3_prime_UTR_variant|MODIFIER|PIGA|ENSG00000165195|Transcript|ENST00000333590.5|protein_coding|6/6||||1822|||||rs1474252014||-1||HGNC|HGNC:8957||1|P1||||||||||||||||||||||||||10.76|0.882938||,T|downstream_gene_variant|MODIFIER|PIGA|ENSG00000165195|Transcript|ENST00000463173.1|retained_intron||||||||||rs1474252014|432|-1||HGNC|HGNC:8957||3|||||||||||||||||||||||||||10.76|0.882938||,T|downstre…	N	N	10.76	N	N	N
X	15321313	.	G	A	G	A	0.0002649	0.513692	0	0.00130548	0	0	0	0	N	N	N	N	N	N	N	N	N	N	N	N	N	CSQ=A|3_prime_UTR_variant|MODIFIER|PIGA|ENSG00000165195|Transcript|ENST00000333590.5|protein_coding|6/6||||1790|||||rs754782099||-1||HGNC|HGNC:8957||1|P1|||0.0003|||||||||||||||||||||||16.01|1.551674||,A|downstream_gene_variant|MODIFIER|PIGA|ENSG00000165195|Transcript|ENST00000463173.1|retained_intron||||||||||rs754782099|400|-1||HGNC|HGNC:8957||3||||0.0003|||||||||||||||||||||||16.01|1.551674||,…	N	N	16.01	N	N	N
X	15321372	.	T	C	T	C	0.00048216	0.486308	N	N	N	N	N	0.000625	0	0	0	0	0	0	0.0027248	0	0	0	0	0	0	CSQ=C|3_prime_UTR_variant|MODIFIER|PIGA|ENSG00000165195|Transcript|ENST00000333590.5|protein_coding|6/6||||1731|||||||-1||HGNC|HGNC:8957||1|P1||||||||||||||||||||||||||9.381|0.741615||,C|downstream_gene_variant|MODIFIER|PIGA|ENSG00000165195|Transcript|ENST00000463173.1|retained_intron|||||||||||341|-1||HGNC|HGNC:8957||3|||||||||||||||||||||||||||9.381|0.741615||,C|downstream_gene_variant|MODIFIER…	N	N	9.381	N	N	N
X	15321420	rs202201866	CA	C	C	C	0.0093399	0	0	0	0.0259222	0.0019084	0	0.0118963	0.00414938	0.0174419	0	0.0185185	0	0	0.0149864	0.00639659	0	0	0.0041841	0	0.0188679	CSQ=-|3_prime_UTR_variant|MODIFIER|PIGA|ENSG00000165195|Transcript|ENST00000333590.5|protein_coding|6/6||||1682|||||rs202201866||-1||HGNC|HGNC:8957||1|P1||||0.0259|0.0019|0|0|0||||||||||||||||||0.430|-0.232795||,-|downstream_gene_variant|MODIFIER|PIGA|ENSG00000165195|Transcript|ENST00000463173.1|retained_intron||||||||||rs202201866|292|-1||HGNC|HGNC:8957||3|||||0.0259|0.0019|0|0|0||||||||||||||||…	N	N	0.43	N	N	N
X	15321425	rs192931358	A	C	A	C	0.0209271	0.513692	0.0497382	0	0	0.0763359	0.00139276	0	N	N	N	N	N	N	N	N	N	N	N	N	N	CSQ=C|3_prime_UTR_variant|MODIFIER|PIGA|ENSG00000165195|Transcript|ENST00000333590.5|protein_coding|6/6||||1678|||||rs192931358&COSV61237506||-1||HGNC|HGNC:8957||1|P1|||0.0209|0|0.0763|0.0497|0|0.0014|||||||||||0&1|0&1||||||0.486|-0.215230||,C|downstream_gene_variant|MODIFIER|PIGA|ENSG00000165195|Transcript|ENST00000463173.1|retained_intron||||||||||rs192931358&COSV61237506|288|-1||HGNC|HGNC:8957…	N	N	0.486	N	N	N
X	15321448	.	T	G	T	G	0.00265051	0	0	0	0.00797607	0	0	0.00404473	0	0.00290698	0.0196078	0	0	0	0	0	0	0	0	0.0344828	0	CSQ=G|3_prime_UTR_variant|MODIFIER|PIGA|ENSG00000165195|Transcript|ENST00000333590.5|protein_coding|6/6||||1655|||||rs758351965||-1||HGNC|HGNC:8957||1|P1|||0.0021|||||||||||||||||||||||5.641|0.330122||,G|downstream_gene_variant|MODIFIER|PIGA|ENSG00000165195|Transcript|ENST00000463173.1|retained_intron||||||||||rs758351965|265|-1||HGNC|HGNC:8957||3||||0.0021|||||||||||||||||||||||5.641|0.330122||,…	N	N	5.641	N	N	N
X	15321451	rs184099983	A	G	A	G	0.0002649	0.513692	0.0013089	0	0	0	0	0	N	N	N	N	N	N	N	N	N	N	N	N	N	CSQ=G|3_prime_UTR_variant|MODIFIER|PIGA|ENSG00000165195|Transcript|ENST00000333590.5|protein_coding|6/6||||1652|||||rs184099983||-1||HGNC|HGNC:8957||1|P1|||0.0003|0|0|0.0013|0|0||||||||||||||||||4.181|0.209142||,G|downstream_gene_variant|MODIFIER|PIGA|ENSG00000165195|Transcript|ENST00000463173.1|retained_intron||||||||||rs184099983|262|-1||HGNC|HGNC:8957||3||||0.0003|0|0|0.0013|0|0|||||||||||||||…	N	N	4.181	N	N	N
X	15321466	rs148660178	C	T	C	T	0.0637385	0	0	0.00522193	0.115653	0.00954198	0.00278552	0.0899358	0.0871369	0.0668605	0.117647	0.0740741	0.0330578	0.0487805	0.0762943	0.110874	0.0789474	0.00948767	0.167364	0.17931	0.113208	CSQ=T|3_prime_UTR_variant|MODIFIER|PIGA|ENSG00000165195|Transcript|ENST00000333590.5|protein_coding|6/6||||1637|||||rs148660178||-1||HGNC|HGNC:8957||1|P1|||0.0336|0.1157|0.0095|0|0.0052|0.0028|0.008571|0.08908|0.005557|0.003095|0|0.0005344|0.00189|0.004593|0.000867|||||||||0.510|-0.208074||,T|downstream_gene_variant|MODIFIER|PIGA|ENSG00000165195|Transcript|ENST00000463173.1|retained_intron|||||||…	N	N	0.51	N	N	N
X	15321474	.	A	G	A	G	0.00025243	0	0	0	0.00099701	0	0	0.00047585	0	0	0	0	0	0	0	0	0	0.00189753	0	0	0	CSQ=G|3_prime_UTR_variant|MODIFIER|PIGA|ENSG00000165195|Transcript|ENST00000333590.5|protein_coding|6/6||||1629|||||rs770570366||-1||HGNC|HGNC:8957||1|P1|||0.0003||||||1.777e-05|0.0002443|0|0|0|0|0|0|0|||||||||7.291|0.495881||,G|downstream_gene_variant|MODIFIER|PIGA|ENSG00000165195|Transcript|ENST00000463173.1|retained_intron||||||||||rs770570366|239|-1||HGNC|HGNC:8957||3||||0.0003||||||1.777e-05…	N	N	7.291	N	N	N
[truncated: 46,321 more rows]

## Sheet: TMPRSS2
chrom	position	rsid	ref	alt	ancestor	minor_allele	maf_all	missing_rate	EAS	EUR	AFR	AMR	SAS	AFR_TopMed_1KG	Kenya.Nilo-Saharan	Cameroon.NigerKordofanian	Tanzania.Afroasiatic	Kenya.Afroasiatic	Botswana.Khoesan	Botswana.Niger-Kordofanian	Ethiopia.Afroasiatic	Cameroon.Pygmy	Ethiopia.Niolo-Saharan	Tanzania.Hadzabe	Cameroon.Fulani	Tanzania.Sandawe	Ethiopia.Sabue	info	CLIN_SIG	Condel	CADD_PHRED	LoFtool	SIFT	PolyPhen
[truncated: 108,272 more rows]

[truncated: 2 more sheets: DDP4, LY6E]
