# Supplementary material for: Impact of natural selection on global patterns of genetic variation, and association with clinical phenotypes, at genes involved in SARS-CoV-2 infection
Source: Res Sq. 2021 Jul 27:rs.3.rs-673011. Preprint. [Version 1] doi: 10.21203/rs.3.rs-673011/v1 (PMC8328070; doi:10.21203/rs.3.rs-673011/v1)
Supplement: Supplement 3 [file 8b72e3698f1cb055309e6286.xlsx]

## Sheet: TopMed_1KG.ACE2_extend_enhancer
chrom	position	rsid	ref	alt	ancestor	minor_allele	maf_all	missing_rate	EAS	EUR	AFR	AMR	SAS	AFR_TopMed_1KG	Kenya.Nilo-Saharan	Cameroon.NigerKordofanian	Tanzania.Afroasiatic	Kenya.Afroasiatic	Botswana.Khoesan	Botswana.Niger-Kordofanian	Ethiopia.Afroasiatic	Cameroon.Pygmy	Ethiopia.Niolo-Saharan	Tanzania.Hadzabe	Cameroon.Fulani	Tanzania.Sandawe	Ethiopia.Sabue	info	CLIN_SIG	Condel	CADD_PHRED	LoFtool	SIFT	PolyPhen
X	15564031	rs140016715	G	A	G	A	0.00024108	0.486308	N	N	N	N	N	0	0	0	0	0	0	0	0	0	0	0	0	0	0	CSQ=A|missense_variant|MODERATE|ACE2|ENSG00000130234|Transcript|ENST00000252519.8|protein_coding|17/18||||2351|2302|768|R/W|Cgg/Tgg|rs140016715&COSV53024501||-1||HGNC|HGNC:13557|NM_001371415.1|1|P1|deleterious_low_confidence(0)|probably_damaging(0.995)|||||||1.385e-05|8.129e-05|0|0|8.541e-05|0|0|0|0||0&1|0&1||||||24.2|3.482634|0.0718|deleterious(0.902),A|missense_variant|MODERATE|ACE2|ENSG0000013…	N	deleterious(0.902)	24.2	0.0718	deleterious_low_confidence(0)	probably_damaging(0.995)
X	15564142	rs147311723	G	A	G	A	0.0116118	0	0	0	0.0169492	0.0019084	0	0.0171306	0	0.0203488	0	0	0	0.0243902	0	0.0831557	0	0.0113852	0	0.00689655	0	CSQ=A|missense_variant|MODERATE|ACE2|ENSG00000130234|Transcript|ENST00000252519.8|protein_coding|17/18||||2240|2191|731|L/F|Ctt/Ttt|rs147311723||-1||HGNC|HGNC:13557|NM_001371415.1|1|P1|deleterious_low_confidence(0)|probably_damaging(0.941)|0.0048|0.0169|0.0019|0|0|0|0.001171|0.01475|0.0004961|0|0|0|2.503e-05|0.0004583|0|||||||||23.1|2.935381|0.0718|deleterious(0.831),A|missense_variant|MODERATE|A…	N	deleterious(0.831)	23.1	0.0718	deleterious_low_confidence(0)	probably_damaging(0.941)
X	15564175	rs41303171	T	C	T	C	0.00450331	0.513692	0	0.0182768	0	0.00381679	0.00139276	0	N	N	N	N	N	N	N	N	N	N	N	N	N	CSQ=C|missense_variant|MODERATE|ACE2|ENSG00000130234|Transcript|ENST00000252519.8|protein_coding|17/18||||2207|2158|720|N/D|Aac/Gac|rs41303171&COSV99071066||-1||HGNC|HGNC:13557|NM_001371415.1|1|P1|tolerated_low_confidence(0.1)|benign(0.02)|0.0045|0|0.0038|0|0.0183|0.0014|0.0164|0.003053|0.002695|0.01678|0|0.02834|0.02583|0.01245|0.00434||0&1|0&1||||||15.23|1.419999|0.0718|neutral(0.287),C|missens…	N	neutral(0.287)	15.23	0.0718	tolerated_low_confidence(0.1)	benign(0.02)
X	15564211	.	G	A	G	A	0.00048216	0.486308	N	N	N	N	N	0.000625	0	0	0	0	0	0	0.0027248	0	0	0	0	0	0	CSQ=A|missense_variant|MODERATE|ACE2|ENSG00000130234|Transcript|ENST00000252519.8|protein_coding|17/18||||2171|2122|708|R/W|Cgg/Tgg|rs776995986||-1||HGNC|HGNC:13557|NM_001371415.1|1|P1|deleterious_low_confidence(0.01)|probably_damaging(0.997)|||||||6.918e-06|0|0|0|0|0|1.462e-05|0|0|||||||||23.9|3.371009|0.0718|deleterious(0.872),A|missense_variant|MODERATE|ACE2|ENSG00000130234|Transcript|ENST0000…	N	deleterious(0.872)	23.9	0.0718	deleterious_low_confidence(0.01)	probably_damaging(0.997)
X	15566282	.	A	C	A	C	0.00024108	0.486308	N	N	N	N	N	0.0003125	0	0.00290698	0	0	0	0	0	0	0	0	0	0	0	CSQ=C|missense_variant|MODERATE|ACE2|ENSG00000130234|Transcript|ENST00000252519.8|protein_coding|16/18||||2134|2085|695|I/M|atT/atG|||-1||HGNC|HGNC:13557|NM_001371415.1|1|P1|deleterious_low_confidence(0)|possibly_damaging(0.718)||||||||||||||||||||||||21.2|2.368137|0.0718|deleterious(0.705),C|missense_variant|MODERATE|ACE2|ENSG00000130234|Transcript|ENST00000427411.1|protein_coding|17/19||||2302|…	N	deleterious(0.705)	21.2	0.0718	deleterious_low_confidence(0)	possibly_damaging(0.718)
X	15566293	rs149039346	A	G	A	G	0.00164079	0	0	0	0.00498504	0	0	0.00166548	0	0.00581395	0	0	0	0	0	0	0	0	0	0	0	CSQ=G|missense_variant|MODERATE|ACE2|ENSG00000130234|Transcript|ENST00000252519.8|protein_coding|16/18||||2123|2074|692|S/P|Tct/Cct|rs149039346||-1||HGNC|HGNC:13557|NM_001371415.1|1|P1|deleterious_low_confidence(0)|possibly_damaging(0.723)|0.0013|0.005|0|0|0|0|0.0003776|0.004946|3.666e-05|0|0|0|2.451e-05|0|5.278e-05|||||||||20.2|2.204089|0.0718|deleterious(0.707),G|missense_variant|MODERATE|ACE2|…	N	deleterious(0.707)	20.2	0.0718	deleterious_low_confidence(0)	possibly_damaging(0.723)
X	15566302	.	T	C	T	C	0.000264901	0.513692	0	0	0	0	0.00139276	0	N	N	N	N	N	N	N	N	N	N	N	N	N	CSQ=C|missense_variant|MODERATE|ACE2|ENSG00000130234|Transcript|ENST00000252519.8|protein_coding|16/18||||2114|2065|689|K/E|Aaa/Gaa|rs777410473||-1||HGNC|HGNC:13557|NM_001371415.1|1|P1|tolerated_low_confidence(0.53)|benign(0)|0.0003||||||1.64e-05|0|0|0|0|0|0|0|0.0001579|||||||||4.568|0.239534|0.0718|neutral(0.007),C|missense_variant|MODERATE|ACE2|ENSG00000130234|Transcript|ENST00000427411.1|prote…	N	neutral(0.007)	4.568	0.0718	tolerated_low_confidence(0.53)	benign(0)
X	15566365	rs200180615	C	T	C	T	0.000529801	0.513692	0.0013089	0	0	0	0.00139276	0	N	N	N	N	N	N	N	N	N	N	N	N	N	CSQ=T|missense_variant|MODERATE|ACE2|ENSG00000130234|Transcript|ENST00000252519.8|protein_coding|16/18||||2051|2002|668|E/K|Gag/Aag|rs200180615||-1||HGNC|HGNC:13557|NM_001371415.1|1|P1|tolerated_low_confidence(0.11)|benign(0.005)|0.0005|0|0|0.0013|0|0.0014|2.2e-05|0|0|0|0.0002177|0|0|0|5.322e-05|||||||||12.88|1.071213|0.0718|neutral(0.272),T|missense_variant|MODERATE|ACE2|ENSG00000130234|Transcri…	N	neutral(0.272)	12.88	0.0718	tolerated_low_confidence(0.11)	benign(0.005)
X	15567737	.	C	G	C	G	0.00024108	0.486308	N	N	N	N	N	0.0003125	0	0	0	0	0	0	0.0013624	0	0	0	0	0	0	CSQ=G|missense_variant|MODERATE|ACE2|ENSG00000130234|Transcript|ENST00000252519.8|protein_coding|15/18||||2035|1986|662|M/I|atG/atC|||-1||HGNC|HGNC:13557|NM_001371415.1|1|P1|tolerated_low_confidence(0.06)|benign(0)||||||||||||||||||||||||0.007|-0.750270|0.0718|neutral(0.323),G|missense_variant|MODERATE|ACE2|ENSG00000130234|Transcript|ENST00000427411.1|protein_coding|16/19||||2203|1986|662|M/I|atG…	N	neutral(0.323)	0.007	0.0718	tolerated_low_confidence(0.06)	benign(0)
X	15567756	rs199951323	A	C	A	C	0.000264901	0.513692	0.0013089	0	0	0	0	0	N	N	N	N	N	N	N	N	N	N	N	N	N	CSQ=C|stop_gained|HIGH|ACE2|ENSG00000130234|Transcript|ENST00000252519.8|protein_coding|15/18||||2016|1967|656|L/*|tTa/tGa|rs199951323||-1||HGNC|HGNC:13557|NM_001371415.1|1|P1|||0.0003|0|0|0.0013|0|0|5.915e-06|0|0|0|7.948e-05|0|0|0|0|||||||||26.7|4.222637|0.0718|,C|stop_gained|HIGH|ACE2|ENSG00000130234|Transcript|ENST00000427411.1|protein_coding|16/19||||2184|1967|656|L/*|tTa/tGa|rs199951323||-1|…	N	N	26.7	0.0718	N	N
X	15567810	rs183135788	T	C	T	C	0.000529801	0.513692	0.0026178	0	0	0	0	0	N	N	N	N	N	N	N	N	N	N	N	N	N	CSQ=C|missense_variant|MODERATE|ACE2|ENSG00000130234|Transcript|ENST00000252519.8|protein_coding|15/18||||1962|1913|638|N/S|aAt/aGt|rs183135788||-1||HGNC|HGNC:13557|NM_001371415.1|1|P1|tolerated(0.33)|benign(0.054)|0.0005|0|0|0.0026|0|0|0.0002628|0|0|0|0.003567|0|0|0|0|||||||||17.02|1.726973|0.0718|neutral(0.028),C|missense_variant|MODERATE|ACE2|ENSG00000130234|Transcript|ENST00000427411.1|protei…	N	neutral(0.028)	17.02	0.0718	tolerated(0.33)	benign(0.054)
X	15571635	.	T	C	T	C	0.00072324	0.486308	N	N	N	N	N	0.000625	0	0	0	0	0.0165289	0	0	0	0	0	0	0	0	CSQ=C|missense_variant|MODERATE|ACE2|ENSG00000130234|Transcript|ENST00000252519.8|protein_coding|13/18||||1875|1826|609|D/G|gAc/gGc|||-1||HGNC|HGNC:13557|NM_001371415.1|1|P1|tolerated(0.08)|benign(0.012)||||||||||||||||||||||||11.54|0.950866|0.0718|neutral(0.300),C|missense_variant|MODERATE|ACE2|ENSG00000130234|Transcript|ENST00000427411.1|protein_coding|14/19||||2043|1826|609|D/G|gAc/gGc|||-1||H…	N	neutral(0.300)	11.54	0.0718	tolerated(0.08)	benign(0.012)
X	15571670	rs145437639	G	T	G	T	0.0106075	0.486308	N	N	N	N	N	0.0134375	0	0.0116279	0	0	0	0	0	0.0831557	0	0	0	0	0	CSQ=T|missense_variant|MODERATE|ACE2|ENSG00000130234|Transcript|ENST00000252519.8|protein_coding|13/18||||1840|1791|597|D/E|gaC/gaA|rs145437639||-1||HGNC|HGNC:13557|NM_001371415.1|1|P1|tolerated(1)|benign(0)|||||||7.743e-05|0.0009218|0|0|0|0|2.47e-05|0|0|||||||||5.897|0.353648|0.0718|neutral(0.000),T|missense_variant|MODERATE|ACE2|ENSG00000130234|Transcript|ENST00000427411.1|protein_coding|14/19|…	N	neutral(0.000)	5.897	0.0718	tolerated(1)	benign(0)
X	15571796	.	G	C	G	C	0.0012054	0.486308	N	N	N	N	N	0.0015625	0	0	0	0	0	0	0.00681199	0	0	0	0	0	0	CSQ=C|missense_variant&splice_region_variant|MODERATE|ACE2|ENSG00000130234|Transcript|ENST00000252519.8|protein_coding|13/18||||1714|1665|555|F/L|ttC/ttG|rs961465783||-1||HGNC|HGNC:13557|NM_001371415.1|1|P1|tolerated(0.44)|benign(0)||||||||||||||||||||||||11.49|0.946809|0.0718|neutral(0.013),C|missense_variant&splice_region_variant|MODERATE|ACE2|ENSG00000130234|Transcript|ENST00000427411.1|protei…	N	neutral(0.013)	11.49	0.0718	tolerated(0.44)	benign(0)
X	15572228	.	T	C	T	C	0.000264901	0.513692	0	0	0	0	0.00139276	0	N	N	N	N	N	N	N	N	N	N	N	N	N	CSQ=C|missense_variant|MODERATE|ACE2|ENSG00000130234|Transcript|ENST00000252519.8|protein_coding|12/18||||1686|1637|546|N/S|aAc/aGc|rs756905974||-1||HGNC|HGNC:13557|NM_001371415.1|1|P1|deleterious(0.04)|benign(0.029)|0.0003||||||5.486e-06|0|0|0|0|0|0|0|5.314e-05|||||||||17.08|1.736454|0.0718|neutral(0.350),C|missense_variant|MODERATE|ACE2|ENSG00000130234|Transcript|ENST00000427411.1|protein_codin…	N	neutral(0.350)	17.08	0.0718	deleterious(0.04)	benign(0.029)
X	15573380	.	A	G	A	G	0.000264901	0.513692	0	0	0	0.0019084	0	0	N	N	N	N	N	N	N	N	N	N	N	N	N	CSQ=G|missense_variant|MODERATE|ACE2|ENSG00000130234|Transcript|ENST00000252519.8|protein_coding|11/18||||1577|1528|510|Y/H|Tac/Cac|rs779199005||-1||HGNC|HGNC:13557|NM_001371415.1|1|P1|deleterious(0.01)|probably_damaging(0.979)|0.0003||||||6.863e-06|0|5.167e-05|0|0|0|0|0|0|||||||||27.9|4.423008|0.0718|deleterious(0.828),G|missense_variant|MODERATE|ACE2|ENSG00000130234|Transcript|ENST00000427411.1…	N	deleterious(0.828)	27.9	0.0718	deleterious(0.01)	probably_damaging(0.979)
X	15573407	rs140473595	C	T	C	T	0.00025243	0	0.0013089	0	0	0	0	0.000237925	0	0	0	0	0	0.0121951	0	0	0	0	0	0	0	CSQ=T|missense_variant|MODERATE|ACE2|ENSG00000130234|Transcript|ENST00000252519.8|protein_coding|11/18||||1550|1501|501|A/T|Gca/Aca|rs140473595||-1||HGNC|HGNC:13557|NM_001371415.1|1|P1|deleterious(0.03)|benign(0.323)|0.0003|0|0|0.0013|0|0|1.259e-05|0|0|0|0|0|2.717e-05|0|0|||||||||23.2|2.996247|0.0718|neutral(0.466),T|missense_variant|MODERATE|ACE2|ENSG00000130234|Transcript|ENST00000427411.1|prot…	N	neutral(0.466)	23.2	0.0718	deleterious(0.03)	benign(0.323)
X	15573445	rs200973492	A	G	A	G	0.00025243	0	0	0	0.000997009	0	0	0.000475851	0	0	0	0	0	0	0.0013624	0	0	0	0	0	0	CSQ=G|missense_variant|MODERATE|ACE2|ENSG00000130234|Transcript|ENST00000252519.8|protein_coding|11/18||||1512|1463|488|V/A|gTg/gCg|rs200973492||-1||HGNC|HGNC:13557|NM_001371415.1|1|P1|tolerated(0.18)|benign(0.061)|0.0003|0.001|0|0|0|0|6.325e-06|8.574e-05|0|0|0|0|0|0|0|||||||||19.89|2.175020|0.0718|neutral(0.060),G|missense_variant|MODERATE|ACE2|ENSG00000130234|Transcript|ENST00000427411.1|protei…	N	neutral(0.060)	19.89	0.0718	tolerated(0.18)	benign(0.061)
X	15573463	.	C	T	C	T	0.00024108	0.486308	N	N	N	N	N	0	0	0	0	0	0	0	0	0	0	0	0	0	0	CSQ=T|missense_variant&splice_region_variant|MODERATE|ACE2|ENSG00000130234|Transcript|ENST00000252519.8|protein_coding|11/18||||1494|1445|482|R/Q|cGa/cAa|rs748359955||-1||HGNC|HGNC:13557|NM_001371415.1|1|P1|tolerated(0.27)|probably_damaging(0.969)|||||||1.344e-05|0|0|0|0|0|2.88e-05|0|0|||||||||24.0|3.407301|0.0718|neutral(0.445),T|missense_variant&splice_region_variant|MODERATE|ACE2|ENSG000001302…	N	neutral(0.445)	24	0.0718	tolerated(0.27)	probably_damaging(0.969)
X	15575706	rs191860450	T	C	T	C	0.000529801	0.513692	0.0026178	0	0	0	0	0	N	N	N	N	N	N	N	N	N	N	N	N	N	CSQ=C|missense_variant|MODERATE|ACE2|ENSG00000130234|Transcript|ENST00000252519.8|protein_coding|10/18||||1451|1402|468|I/V|Att/Gtt|rs191860450||-1||HGNC|HGNC:13557|NM_001371415.1|1|P1|deleterious(0.02)|possibly_damaging(0.747)|0.0005|0|0|0.0026|0|0|0.0008633|0|0|0|0.01121|0|2.496e-05|0.0002277|5.575e-05|||||||||23.9|3.333139|0.0718|deleterious(0.657),C|missense_variant|MODERATE|ACE2|ENSG00000130…	N	deleterious(0.657)	23.9	0.0718	deleterious(0.02)	possibly_damaging(0.747)
X	15575745	.	T	C	T	C	0.00072324	0.486308	N	N	N	N	N	0.0003125	0	0	0	0	0	0	0.0013624	0	0	0	0	0	0	CSQ=C|missense_variant|MODERATE|ACE2|ENSG00000130234|Transcript|ENST00000252519.8|protein_coding|10/18||||1412|1363|455|M/V|Atg/Gtg|||-1||HGNC|HGNC:13557|NM_001371415.1|1|P1|deleterious(0.04)|benign(0.304)||||||||||||||||||||||||23.3|3.051922|0.0718|neutral(0.444),C|missense_variant|MODERATE|ACE2|ENSG00000130234|Transcript|ENST00000427411.1|protein_coding|11/19||||1580|1363|455|M/V|Atg/Gtg|||-1||…	N	neutral(0.444)	23.3	0.0718	deleterious(0.04)	benign(0.304)
X	15575774	.	G	A	G	A	0.00048216	0.486308	N	N	N	N	N	0.000625	0	0	0.00653595	0	0	0	0	0	0	0	0	0.00689655	0	CSQ=A|missense_variant|MODERATE|ACE2|ENSG00000130234|Transcript|ENST00000252519.8|protein_coding|10/18||||1383|1334|445|T/M|aCg/aTg|rs764772589||-1||HGNC|HGNC:13557|NM_001371415.1|1|P1|deleterious(0.02)|probably_damaging(0.949)|||||||5.869e-06|0|0|0|0|0|0|0|6.043e-05|||||||||25.3|3.883421|0.0718|deleterious(0.776),A|missense_variant|MODERATE|ACE2|ENSG00000130234|Transcript|ENST00000427411.1|prote…	N	deleterious(0.776)	25.3	0.0718	deleterious(0.02)	probably_damaging(0.949)
X	15581230	.	C	T	C	T	0.00024108	0.486308	N	N	N	N	N	0.0003125	0	0	0	0	0	0	0	0	0	0	0.0041841	0	0	CSQ=T|missense_variant|MODERATE|ACE2|ENSG00000130234|Transcript|ENST00000252519.8|protein_coding|8/18||||1110|1061|354|G/D|gGc/gAc|||-1||HGNC|HGNC:13557|NM_001371415.1|1|P1|tolerated(0.13)|benign(0.003)||||||||||||||||||||||||1.224|-0.065978|0.0718|neutral(0.253),T|missense_variant|MODERATE|ACE2|ENSG00000130234|Transcript|ENST00000427411.1|protein_coding|9/19||||1278|1061|354|G/D|gGc/gAc|||-1||HG…	N	neutral(0.253)	1.224	0.0718	tolerated(0.13)	benign(0.003)
X	15581269	rs138390800	T	C	T	C	0.0116118	0	0	0	0.00299103	0	0	0.0209374	0.00414938	0.0174419	0	0	0	0	0	0.164179	0	0.00189753	0	0	0	CSQ=C|missense_variant|MODERATE|ACE2|ENSG00000130234|Transcript|ENST00000252519.8|protein_coding|8/18||||1071|1022|341|K/R|aAa/aGa|rs138390800||-1||HGNC|HGNC:13557|NM_001371415.1|1|P1|deleterious(0.02)|benign(0.215)|0.0008|0.003|0|0|0|0|0.0003268|0.003988|0.0001874|0|0|0|0|0.0004521|0|||||||||19.32|2.090795|0.0718|neutral(0.404),C|missense_variant|MODERATE|ACE2|ENSG00000130234|Transcript|ENST0000…	N	neutral(0.404)	19.32	0.0718	deleterious(0.02)	benign(0.215)
X	15581297	rs185525294	T	A	T	A	0.000264901	0.513692	0	0	0.000997009	0	0	0.000997009	N	N	N	N	N	N	N	N	N	N	N	N	N	CSQ=A|missense_variant|MODERATE|ACE2|ENSG00000130234|Transcript|ENST00000252519.8|protein_coding|8/18||||1043|994|332|M/L|Atg/Ttg|rs185525294||-1||HGNC|HGNC:13557|NM_001371415.1|1|P1|deleterious(0.02)|benign(0.428)|0.0003|0.001|0|0|0|0|1.654e-05|0.0002295|0|0|0|0|0|0|0|||||||||23.1|2.948705|0.0718|deleterious(0.522),A|missense_variant|MODERATE|ACE2|ENSG00000130234|Transcript|ENST00000427411.1|pro…	N	deleterious(0.522)	23.1	0.0718	deleterious(0.02)	benign(0.428)
X	15581357	.	C	T	C	T	0.000264901	0.513692	0	0	0.000997009	0	0	0.000997009	N	N	N	N	N	N	N	N	N	N	N	N	N	CSQ=T|missense_variant|MODERATE|ACE2|ENSG00000130234|Transcript|ENST00000252519.8|protein_coding|8/18||||983|934|312|E/K|Gag/Aag|rs780574871||-1||HGNC|HGNC:13557|NM_001371415.1|1|P1|deleterious(0)|possibly_damaging(0.581)|0.0003||||||1.134e-05|0.0001566|0|0|0|0|0|0|0|||||||||23.9|3.358564|0.0718|deleterious(0.645),T|missense_variant|MODERATE|ACE2|ENSG00000130234|Transcript|ENST00000427411.1|prote…	N	deleterious(0.645)	23.9	0.0718	deleterious(0)	possibly_damaging(0.581)
X	15581368	.	A	G	A	G	0.00024108	0.486308	N	N	N	N	N	0.0003125	0	0	0	0	0	0	0	0	0	0.00189753	0	0	0	CSQ=G|missense_variant|MODERATE|ACE2|ENSG00000130234|Transcript|ENST00000252519.8|protein_coding|8/18||||972|923|308|F/S|tTc/tCc|||-1||HGNC|HGNC:13557|NM_001371415.1|1|P1|deleterious(0.01)|probably_damaging(0.997)||||||||||||||||||||||||27.4|4.350252|0.0718|deleterious(0.872),G|missense_variant|MODERATE|ACE2|ENSG00000130234|Transcript|ENST00000427411.1|protein_coding|9/19||||1140|923|308|F/S|tTc/…	N	deleterious(0.872)	27.4	0.0718	deleterious(0.01)	probably_damaging(0.997)
X	15581384	.	C	T	C	T	0.000264901	0.513692	0	0	0	0	0.00139276	0	N	N	N	N	N	N	N	N	N	N	N	N	N	CSQ=T|missense_variant|MODERATE|ACE2|ENSG00000130234|Transcript|ENST00000252519.8|protein_coding|8/18||||956|907|303|D/N|Gat/Aat|rs749750821||-1||HGNC|HGNC:13557|NM_001371415.1|1|P1|tolerated(0.9)|benign(0.012)|0.0003||||||1.203e-05|0|0|0|0|0|0|0|0.0001315|||||||||10.83|0.889169|0.0718|neutral(0.001),T|missense_variant|MODERATE|ACE2|ENSG00000130234|Transcript|ENST00000427411.1|protein_coding|9/19…	N	neutral(0.001)	10.83	0.0718	tolerated(0.9)	benign(0.012)
X	15585491	.	T	A	T	A	0.00024108	0.486308	N	N	N	N	N	0	0	0	0	0	0	0	0	0	0	0	0	0	0	CSQ=A|missense_variant|MODERATE|ACE2|ENSG00000130234|Transcript|ENST00000252519.8|protein_coding|7/18||||933|884|295|D/V|gAt/gTt|COSV53026522||-1||HGNC|HGNC:13557|NM_001371415.1|1|P1|tolerated(0.06)|benign(0.145)|||||||||||||||||1|1||||||16.40|1.620014|0.0718|neutral(0.335),A|missense_variant|MODERATE|ACE2|ENSG00000130234|Transcript|ENST00000427411.1|protein_coding|8/19||||1101|884|295|D/V|gAt/gT…	N	neutral(0.335)	16.4	0.0718	tolerated(0.06)	benign(0.145)
X	15585500	.	T	A	T	A	0.00024108	0.486308	N	N	N	N	N	0.0003125	0	0	0	0	0	0	0.0013624	0	0	0	0	0	0	CSQ=A|missense_variant|MODERATE|ACE2|ENSG00000130234|Transcript|ENST00000252519.8|protein_coding|7/18||||924|875|292|D/V|gAt/gTt|||-1||HGNC|HGNC:13557|NM_001371415.1|1|P1|deleterious(0)|probably_damaging(0.998)||||||||||||||||||||||||26.8|4.250166|0.0718|deleterious(0.919),A|missense_variant|MODERATE|ACE2|ENSG00000130234|Transcript|ENST00000427411.1|protein_coding|8/19||||1092|875|292|D/V|gAt/gTt…	N	deleterious(0.919)	26.8	0.0718	deleterious(0)	probably_damaging(0.998)
X	15587785	.	C	T	C	T	0.000264901	0.513692	0.0013089	0	0	0	0	0	N	N	N	N	N	N	N	N	N	N	N	N	N	CSQ=T|missense_variant|MODERATE|ACE2|ENSG00000130234|Transcript|ENST00000252519.8|protein_coding|6/18||||819|770|257|S/N|aGt/aAt|rs745514718||-1||HGNC|HGNC:13557|NM_001371415.1|1|P1|tolerated(0.93)|benign(0.006)|0.0003||||||2.316e-05|0|0|0|0.0003149|0|0|0|0|||||||||4.606|0.242543|0.0718|neutral(0.000),T|missense_variant|MODERATE|ACE2|ENSG00000130234|Transcript|ENST00000427411.1|protein_coding|7/1…	N	neutral(0.000)	4.606	0.0718	tolerated(0.93)	benign(0.006)
X	15589364	.	C	T	C	T	0.00048216	0.486308	N	N	N	N	N	0.000625	0	0	0	0	0	0	0.0027248	0	0	0	0	0	0	CSQ=T|missense_variant|MODERATE|ACE2|ENSG00000130234|Transcript|ENST00000252519.8|protein_coding|5/18||||725|676|226|V/M|Gtg/Atg|||-1||HGNC|HGNC:13557|NM_001371415.1|1|P1|tolerated(0.06)|probably_damaging(0.915)||||||||||||||||||||||||23.0|2.906531|0.0718|deleterious(0.689),T|missense_variant|MODERATE|ACE2|ENSG00000130234|Transcript|ENST00000427411.1|protein_coding|6/19||||893|676|226|V/M|Gtg/Atg…	N	deleterious(0.689)	23	0.0718	tolerated(0.06)	probably_damaging(0.915)
X	15589384	.	C	T	C	T	0.00024108	0.486308	N	N	N	N	N	0.0003125	0	0	0	0	0	0	0.0013624	0	0	0	0	0	0	CSQ=T|missense_variant|MODERATE|ACE2|ENSG00000130234|Transcript|ENST00000252519.8|protein_coding|5/18||||705|656|219|R/H|cGc/cAc|rs759590772&COSV53025209&COSV53027016||-1||HGNC|HGNC:13557|NM_001371415.1|1|P1|deleterious(0)|probably_damaging(0.926)|||||||9.831e-05|0|0|0|0|0|1.224e-05|0|0.0008925||0&1&1|0&1&1||||||23.3|3.065896|0.0718|deleterious(0.819),T|missense_variant|MODERATE|ACE2|ENSG00000130…	N	deleterious(0.819)	23.3	0.0718	deleterious(0)	probably_damaging(0.926)
X	15589385	rs372272603	G	A	G	A	0.000264901	0.513692	0	0	0	0	0.00139276	0	N	N	N	N	N	N	N	N	N	N	N	N	N	CSQ=A|missense_variant|MODERATE|ACE2|ENSG00000130234|Transcript|ENST00000252519.8|protein_coding|5/18||||704|655|219|R/C|Cgc/Tgc|rs372272603||-1||HGNC|HGNC:13557|NM_001371415.1|1|P1|deleterious(0)|probably_damaging(0.976)|0.0003|0|0|0|0|0.0014|0.0003223|7.61e-05|0|0|0|0|0.0006609|0.0002213|0.0001575|||||||||23.8|3.301337|0.0718|deleterious(0.863),A|missense_variant|MODERATE|ACE2|ENSG00000130234|T…	N	deleterious(0.863)	23.8	0.0718	deleterious(0)	probably_damaging(0.976)
X	15589429	.	C	G	C	G	0.000264901	0.513692	0	0	0	0	0.00139276	0	N	N	N	N	N	N	N	N	N	N	N	N	N	CSQ=G|missense_variant|MODERATE|ACE2|ENSG00000130234|Transcript|ENST00000252519.8|protein_coding|5/18||||660|611|204|R/T|aGa/aCa|rs779790336&COSV53027328||-1||HGNC|HGNC:13557|NM_001371415.1|1|P1|deleterious(0)|probably_damaging(0.999)|0.0003||||||5.482e-06|0|0|0|0|0|0|0|5.297e-05||0&1|0&1||||||24.0|3.401415|0.0718|deleterious(0.935),G|missense_variant|MODERATE|ACE2|ENSG00000130234|Transcript|ENST…	N	deleterious(0.935)	24	0.0718	deleterious(0)	probably_damaging(0.999)
X	15591850	rs373252182	T	C	T	C	0.00048216	0.486308	N	N	N	N	N	0.000625	0	0	0.00653595	0	0	0	0	0	0	0	0	0.00689655	0	CSQ=C|missense_variant|MODERATE|ACE2|ENSG00000130234|Transcript|ENST00000252519.8|protein_coding|4/18||||495|446|149|N/S|aAt/aGt|rs373252182||-1||HGNC|HGNC:13557|NM_001371415.1|1|P1|tolerated(0.19)|benign(0.015)||||||||||||||||||||||||15.57|1.478066|0.0718|neutral(0.050),C|missense_variant|MODERATE|ACE2|ENSG00000130234|Transcript|ENST00000427411.1|protein_coding|5/19||||663|446|149|N/S|aAt/aGt|rs…	N	neutral(0.050)	15.57	0.0718	tolerated(0.19)	benign(0.015)
X	15594846	rs201900069	C	T	C	T	0.000264901	0.513692	0.0013089	0	0	0	0	0	N	N	N	N	N	N	N	N	N	N	N	N	N	CSQ=T|missense_variant&splice_region_variant|MODERATE|ACE2|ENSG00000130234|Transcript|ENST00000252519.8|protein_coding|2/18||||393|344|115|R/Q|cGg/cAg|rs201900069&COSV53025217||-1||HGNC|HGNC:13557|NM_001371415.1|1|P1|tolerated(0.43)|benign(0.007)|0.0003|0|0|0.0013|0|0|0.0001744|0|0|0|0.000741|0|0.0002608|0|0||0&1|0&1||||||4.668|0.247472|0.0718|neutral(0.013),T|missense_variant&splice_region_varia…	N	neutral(0.013)	4.668	0.0718	tolerated(0.43)	benign(0.007)
X	15594895	.	C	T	C	T	0.00024108	0.486308	N	N	N	N	N	0.0003125	0.00414938	0	0	0	0	0	0	0	0	0	0	0	0	CSQ=T|missense_variant|MODERATE|ACE2|ENSG00000130234|Transcript|ENST00000252519.8|protein_coding|2/18||||344|295|99|A/T|Gct/Act|||-1||HGNC|HGNC:13557|NM_001371415.1|1|P1|tolerated(0.53)|benign(0.053)||||||||||||||||||||||||2.950|0.113129|0.0718|neutral(0.011),T|missense_variant|MODERATE|ACE2|ENSG00000130234|Transcript|ENST00000427411.1|protein_coding|3/19||||512|295|99|A/T|Gct/Act|||-1||HGNC|HGNC…	N	neutral(0.011)	2.95	0.0718	tolerated(0.53)	benign(0.053)
X	15600784	.	C	T	C	T	0.00192864	0.486308	N	N	N	N	N	0.0025	0.00414938	0	0	0.0185185	0	0	0.00817439	0	0	0	0	0	0	CSQ=T|missense_variant|MODERATE|ACE2|ENSG00000130234|Transcript|ENST00000252519.8|protein_coding|1/18||||177|128|43|S/N|aGt/aAt|||-1||HGNC|HGNC:13557|NM_001371415.1|1|P1|tolerated(0.3)|benign(0.017)||||||||||||||||||||||||9.098|0.708567|0.0718|neutral(0.029),T|upstream_gene_variant|MODIFIER|AC097625.1|ENSG00000225833|Transcript|ENST00000421585.1|lncRNA|||||||||||2097|1||Clone_based_ensembl_gene||…	N	neutral(0.029)	9.098	0.0718	tolerated(0.3)	benign(0.017)
X	15600835	rs4646116	T	C	T	C	0.00211921	0.513692	0	0.00522193	0.00199402	0	0.00278552	0.00199402	N	N	N	N	N	N	N	N	N	N	N	N	N	CSQ=C|missense_variant|MODERATE|ACE2|ENSG00000130234|Transcript|ENST00000252519.8|protein_coding|1/18||||126|77|26|K/R|aAg/aGg|rs4646116||-1||HGNC|HGNC:13557|NM_001371415.1|1|P1|tolerated(0.41)|benign(0.001)|0.0021|0.002|0|0|0.0052|0.0028|0.003971|0.0009877|0.003286|0.01203|7.225e-05|0.0005622|0.005899|0.003754|0.001313|||||||||4.709|0.250762|0.0718|neutral(0.015),C|upstream_gene_variant|MODIFIER…	N	neutral(0.015)	4.709	0.0718	tolerated(0.41)	benign(0.001)
X	15600857	rs73635825	A	G	A	G	0.000794702	0.513692	0	0	0.00299103	0	0	0.00299103	N	N	N	N	N	N	N	N	N	N	N	N	N	CSQ=G|missense_variant|MODERATE|ACE2|ENSG00000130234|Transcript|ENST00000252519.8|protein_coding|1/18||||104|55|19|S/P|Tcc/Ccc|rs73635825||-1||HGNC|HGNC:13557|NM_001371415.1|1|P1|tolerated(0.19)|possibly_damaging(0.74)|0.0008|0.003|0|0|0|0|0.0002518|0.003423|0|0|0|0|0|0.0002217|0|||||||||15.37|1.444192|0.0718|neutral(0.321),G|upstream_gene_variant|MODIFIER|AC097625.1|ENSG00000225833|Transcript|EN…	N	neutral(0.321)	15.37	0.0718	tolerated(0.19)	possibly_damaging(0.74)
