# Supplementary material for: Impact of natural selection on global patterns of genetic variation, and association with clinical phenotypes, at genes involved in SARS-CoV-2 infection
Source: Res Sq. 2021 Jul 27:rs.3.rs-673011. Preprint. [Version 1] doi: 10.21203/rs.3.rs-673011/v1 (PMC8328070; doi:10.21203/rs.3.rs-673011/v1)
Supplement: Supplement 4 [file 945e2400a8050b9bbabe218e.xlsx]

## Sheet: High_potential_regulatory_eQTLs
eQTL in the promoter or enhancer of ACE2, TMPRSS2, DPP4, LY6E
Gene	Gene	Chr	Position	Ref	Alt	rsID	eQTL(GTEx)	Annotation
ENSG00000130234.10	ACE2	chrX	15674316	A	C	rs4830977	eQTL_ACE2 (Brain, Nerve, Artery, Pituitary, Prostate, Adipose)	Enhancer (ChIA-PET)
ENSG00000130234.10	ACE2	chrX	15674699	T	C	rs4830978	eQTL_ACE2 (Brain, Nerve, Artery, Pituitary, Prostate, Adipose)	Enhancer (ChIA-PET)
ENSG00000130234.10	ACE2	chrX	15674766	C	G	rs5936010	eQTL_ACE2 (Brain, Nerve, Artery, Pituitary, Adipose)	Enhancer (ChIA-PET)
ENSG00000130234.10	ACE2	chrX	15675244	A	G	rs4830979	eQTL_ACE2 (Brain, Nerve, Artery, Pituitary, Prostate, Adipose)	Enhancer (ChIA-PET)
ENSG00000130234.10	ACE2	chrX	15675338	T	A	rs4830980	eQTL_ACE2 (Brain, Nerve, Artery, Pituitary, Prostate)	Enhancer (ChIA-PET)
ENSG00000130234.10	ACE2	chrX	15675734	C	T	rs5934263	eQTL_ACE2 (Brain, Nerve, Artery, Pituitary, Prostate)	Enhancer (ChIA-PET)
ENSG00000184012.11	TMPRSS2	chr21	41508700	G	A	rs76833541	eQTL_TMPRSS2 (Testis)	Promoter
ENSG00000184012.11	TMPRSS2	chr21	41508701	T	G	rs4283504	eQTL_TMPRSS2 (Testis)	Promoter
ENSG00000197635.9	DPP4	chr2	162073199	T	G	rs1861978	eQTL_DPP4 (Colon, Brain)	Promoter
ENSG00000197635.9	DPP4	chr2	162073222	G	A	rs35128070	eQTL_DPP4 (Colon, Brain)	Promoter
ENSG00000197635.9	DPP4	chr2	162073469	A	G	rs17574	eQTL_DPP4 (Colon, Brain, Lung)	Promoter
ENSG00000197635.9	DPP4	chr2	162074215	T	G	rs13015258	eQTL_DPP4 (Lung, Thyroid)	Promoter
ENSG00000160932.10	LY6E	chr8	143017718	G	C	rs13252864	eQTL_LY6E (Esophagus, Nerve)	Promoter
ENSG00000160932.10	LY6E	chr8	143018261	G	A	rs17061979	eQTL_LY6E (Esophagus, Nerve, Adipose, Cultured fibroblasts, Whole Blood)	Promoter
ENSG00000160932.10	LY6E	chr8	143018292	C	A	rs114909654	eQTL_LY6E (Esophagus, Skin)	Promoter

## Sheet: ACE2_GTEx_eQTL
Transcript	Gene	Chr	Position	Ref	Alt	Genome	rsID	P-Value	NES	Tissue
ENSG00000130234.10	ACE2	chrX	15675427	G	GGGCGCGGTCCTTACGTGT	b38	rs200781818	1.4e-17	0.62	Brain - Frontal Cortex (BA9)
ENSG00000130234.10	ACE2	chrX	15658294	G	A	b38	rs4830974	2.6e-17	0.6	Brain - Frontal Cortex (BA9)
ENSG00000130234.10	ACE2	chrX	15660059	G	A	b38	rs4830975	2.6e-17	0.6	Brain - Frontal Cortex (BA9)
ENSG00000130234.10	ACE2	chrX	15666611	A	G	b38	rs5936007	2.6e-17	0.6	Brain - Frontal Cortex (BA9)
ENSG00000130234.10	ACE2	chrX	15667361	C	A	b38	rs4830976	2.6e-17	0.6	Brain - Frontal Cortex (BA9)
ENSG00000130234.10	ACE2	chrX	15667422	C	G	b38	rs4830544	2.6e-17	0.6	Brain - Frontal Cortex (BA9)
ENSG00000130234.10	ACE2	chrX	15667464	C	T	b38	rs4830545	2.6e-17	0.6	Brain - Frontal Cortex (BA9)
ENSG00000130234.10	ACE2	chrX	15671586	G	C	b38	rs1533363	2.6e-17	0.6	Brain - Frontal Cortex (BA9)
ENSG00000130234.10	ACE2	chrX	15673559	C	A	b38	rs1554087	2.6e-17	0.6	Brain - Frontal Cortex (BA9)
ENSG00000130234.10	ACE2	chrX	15673898	T	A	b38	rs5934262	2.6e-17	0.6	Brain - Frontal Cortex (BA9)
ENSG00000130234.10	ACE2	chrX	15674316	A	C	b38	rs4830977	2.6e-17	0.6	Brain - Frontal Cortex (BA9)
ENSG00000130234.10	ACE2	chrX	15674699	T	C	b38	rs4830978	2.6e-17	0.6	Brain - Frontal Cortex (BA9)
ENSG00000130234.10	ACE2	chrX	15675244	A	G	b38	rs4830979	2.6e-17	0.6	Brain - Frontal Cortex (BA9)
ENSG00000130234.10	ACE2	chrX	15675338	T	A	b38	rs4830980	2.6e-17	0.6	Brain - Frontal Cortex (BA9)
ENSG00000130234.10	ACE2	chrX	15676066	A	C	b38	rs997294	2.6e-17	0.6	Brain - Frontal Cortex (BA9)
ENSG00000130234.10	ACE2	chrX	15676490	T	C	b38	rs7065227	2.6e-17	0.6	Brain - Frontal Cortex (BA9)
ENSG00000130234.10	ACE2	chrX	15676654	A	G	b38	rs10521649	2.6e-17	0.6	Brain - Frontal Cortex (BA9)
ENSG00000130234.10	ACE2	chrX	15682840	G	A	b38	rs4830982	2.6e-17	0.6	Brain - Frontal Cortex (BA9)
ENSG00000130234.10	ACE2	chrX	15685402	A	G	b38	rs6632710	2.6e-17	0.6	Brain - Frontal Cortex (BA9)
ENSG00000130234.10	ACE2	chrX	15688707	C	A	b38	rs4060	2.6e-17	0.6	Brain - Frontal Cortex (BA9)
ENSG00000130234.10	ACE2	chrX	15690021	G	A	b38	rs6527627	2.6e-17	0.6	Brain - Frontal Cortex (BA9)
ENSG00000130234.10	ACE2	chrX	15694830	G	A	b38	rs4830987	2.6e-17	0.6	Brain - Frontal Cortex (BA9)
ENSG00000130234.10	ACE2	chrX	15695950	G	A	b38	rs5936013	2.6e-17	0.6	Brain - Frontal Cortex (BA9)
ENSG00000130234.10	ACE2	chrX	15698680	A	T	b38	rs5936016	2.6e-17	0.6	Brain - Frontal Cortex (BA9)
ENSG00000130234.10	ACE2	chrX	15698764	T	C	b38	rs5936017	2.6e-17	0.6	Brain - Frontal Cortex (BA9)
ENSG00000130234.10	ACE2	chrX	15702202	A	G	b38	rs1877923	2.6e-17	0.6	Brain - Frontal Cortex (BA9)
ENSG00000130234.10	ACE2	chrX	15702557	CTG	C	b38	rs35373086	2.6e-17	0.6	Brain - Frontal Cortex (BA9)
ENSG00000130234.10	ACE2	chrX	15702600	C	T	b38	rs5934267	2.6e-17	0.6	Brain - Frontal Cortex (BA9)
ENSG00000130234.10	ACE2	chrX	15707807	G	T	b38	rs2873135	2.6e-17	0.6	Brain - Frontal Cortex (BA9)
ENSG00000130234.10	ACE2	chrX	15708300	C	T	b38	rs5936021	2.6e-17	0.6	Brain - Frontal Cortex (BA9)
ENSG00000130234.10	ACE2	chrX	15709365	G	C	b38	rs4830546	2.6e-17	0.6	Brain - Frontal Cortex (BA9)
ENSG00000130234.10	ACE2	chrX	15713217	T	C	b38	rs6527633	2.6e-17	0.6	Brain - Frontal Cortex (BA9)
ENSG00000130234.10	ACE2	chrX	15713432	G	A	b38	rs1811781	2.6e-17	0.6	Brain - Frontal Cortex (BA9)
ENSG00000130234.10	ACE2	chrX	15713496	G	T	b38	rs2012660	2.6e-17	0.6	Brain - Frontal Cortex (BA9)
ENSG00000130234.10	ACE2	chrX	15715881	C	T	b38	rs5936026	2.6e-17	0.6	Brain - Frontal Cortex (BA9)
ENSG00000130234.10	ACE2	chrX	15718136	C	G	b38	rs1849864	2.6e-17	0.6	Brain - Frontal Cortex (BA9)
ENSG00000130234.10	ACE2	chrX	15693086	C	T	b38	rs1996225	3.3e-17	0.27	Nerve - Tibial
ENSG00000130234.10	ACE2	chrX	15658294	G	A	b38	rs4830974	3.7e-17	0.27	Nerve - Tibial
ENSG00000130234.10	ACE2	chrX	15660010	C	T	b38	rs5934260	3.7e-17	0.27	Nerve - Tibial
ENSG00000130234.10	ACE2	chrX	15660059	G	A	b38	rs4830975	3.7e-17	0.27	Nerve - Tibial
ENSG00000130234.10	ACE2	chrX	15662833	C	A	b38	rs5936006	3.7e-17	0.27	Nerve - Tibial
ENSG00000130234.10	ACE2	chrX	15663053	A	T	b38	rs6632702	3.7e-17	0.27	Nerve - Tibial
ENSG00000130234.10	ACE2	chrX	15663897	G	T	b38	rs5978732	3.7e-17	0.27	Nerve - Tibial
ENSG00000130234.10	ACE2	chrX	15667361	C	A	b38	rs4830976	3.7e-17	0.27	Nerve - Tibial
ENSG00000130234.10	ACE2	chrX	15667422	C	G	b38	rs4830544	3.7e-17	0.27	Nerve - Tibial
ENSG00000130234.10	ACE2	chrX	15667464	C	T	b38	rs4830545	3.7e-17	0.27	Nerve - Tibial
ENSG00000130234.10	ACE2	chrX	15671586	G	C	b38	rs1533363	3.7e-17	0.27	Nerve - Tibial
ENSG00000130234.10	ACE2	chrX	15673559	C	A	b38	rs1554087	3.7e-17	0.27	Nerve - Tibial
ENSG00000130234.10	ACE2	chrX	15673898	T	A	b38	rs5934262	3.7e-17	0.27	Nerve - Tibial
ENSG00000130234.10	ACE2	chrX	15674316	A	C	b38	rs4830977	3.7e-17	0.27	Nerve - Tibial
ENSG00000130234.10	ACE2	chrX	15674699	T	C	b38	rs4830978	3.7e-17	0.27	Nerve - Tibial
ENSG00000130234.10	ACE2	chrX	15675244	A	G	b38	rs4830979	3.7e-17	0.27	Nerve - Tibial
ENSG00000130234.10	ACE2	chrX	15675338	T	A	b38	rs4830980	3.7e-17	0.27	Nerve - Tibial
ENSG00000130234.10	ACE2	chrX	15676066	A	C	b38	rs997294	3.7e-17	0.27	Nerve - Tibial
ENSG00000130234.10	ACE2	chrX	15676490	T	C	b38	rs7065227	3.7e-17	0.27	Nerve - Tibial
ENSG00000130234.10	ACE2	chrX	15682840	G	A	b38	rs4830982	3.7e-17	0.27	Nerve - Tibial
ENSG00000130234.10	ACE2	chrX	15685402	A	G	b38	rs6632710	3.7e-17	0.27	Nerve - Tibial
ENSG00000130234.10	ACE2	chrX	15690021	G	A	b38	rs6527627	3.7e-17	0.27	Nerve - Tibial
ENSG00000130234.10	ACE2	chrX	15694830	G	A	b38	rs4830987	3.7e-17	0.27	Nerve - Tibial
ENSG00000130234.10	ACE2	chrX	15698680	A	T	b38	rs5936016	3.7e-17	0.27	Nerve - Tibial
ENSG00000130234.10	ACE2	chrX	15698764	T	C	b38	rs5936017	3.7e-17	0.27	Nerve - Tibial
ENSG00000130234.10	ACE2	chrX	15702202	A	G	b38	rs1877923	3.7e-17	0.27	Nerve - Tibial
ENSG00000130234.10	ACE2	chrX	15702557	CTG	C	b38	rs35373086	3.7e-17	0.27	Nerve - Tibial
ENSG00000130234.10	ACE2	chrX	15702600	C	T	b38	rs5934267	3.7e-17	0.27	Nerve - Tibial
ENSG00000130234.10	ACE2	chrX	15707807	G	T	b38	rs2873135	3.7e-17	0.27	Nerve - Tibial
ENSG00000130234.10	ACE2	chrX	15708300	C	T	b38	rs5936021	3.7e-17	0.27	Nerve - Tibial
ENSG00000130234.10	ACE2	chrX	15709365	G	C	b38	rs4830546	3.7e-17	0.27	Nerve - Tibial
ENSG00000130234.10	ACE2	chrX	15713217	T	C	b38	rs6527633	3.7e-17	0.27	Nerve - Tibial
ENSG00000130234.10	ACE2	chrX	15713432	G	A	b38	rs1811781	3.7e-17	0.27	Nerve - Tibial
ENSG00000130234.10	ACE2	chrX	15713496	G	T	b38	rs2012660	3.7e-17	0.27	Nerve - Tibial
ENSG00000130234.10	ACE2	chrX	15715881	C	T	b38	rs5936026	3.7e-17	0.27	Nerve - Tibial
ENSG00000130234.10	ACE2	chrX	15718136	C	G	b38	rs1849864	3.7e-17	0.27	Nerve - Tibial
ENSG00000130234.10	ACE2	chrX	15688707	C	A	b38	rs4060	3.7e-17	0.27	Nerve - Tibial
ENSG00000130234.10	ACE2	chrX	15695950	G	A	b38	rs5936013	3.7e-17	0.27	Nerve - Tibial
ENSG00000130234.10	ACE2	chrX	15660010	C	T	b38	rs5934260	4.4e-17	0.6	Brain - Frontal Cortex (BA9)
ENSG00000130234.10	ACE2	chrX	15662833	C	A	b38	rs5936006	4.4e-17	0.6	Brain - Frontal Cortex (BA9)
ENSG00000130234.10	ACE2	chrX	15663053	A	T	b38	rs6632702	4.4e-17	0.6	Brain - Frontal Cortex (BA9)
ENSG00000130234.10	ACE2	chrX	15663897	G	T	b38	rs5978732	4.4e-17	0.6	Brain - Frontal Cortex (BA9)
ENSG00000130234.10	ACE2	chrX	15629578	A	G	b38	rs2106806	6.3e-17	0.28	Nerve - Tibial
ENSG00000130234.10	ACE2	chrX	15666611	A	G	b38	rs5936007	8.2e-17	0.27	Nerve - Tibial
ENSG00000130234.10	ACE2	chrX	15676654	A	G	b38	rs10521649	8.2e-17	0.27	Nerve - Tibial
ENSG00000130234.10	ACE2	chrX	15643040	A	G	b38	rs5934254	8.7e-17	0.28	Nerve - Tibial
ENSG00000130234.10	ACE2	chrX	15646921	C	G	b38	rs5934256	8.7e-17	0.28	Nerve - Tibial
ENSG00000130234.10	ACE2	chrX	15655180	C	T	b38	rs5934259	8.7e-17	0.28	Nerve - Tibial
ENSG00000130234.10	ACE2	chrX	15658294	G	A	b38	rs4830974	8.9e-17	0.6	Brain - Cortex
ENSG00000130234.10	ACE2	chrX	15660059	G	A	b38	rs4830975	8.9e-17	0.6	Brain - Cortex
ENSG00000130234.10	ACE2	chrX	15666611	A	G	b38	rs5936007	8.9e-17	0.6	Brain - Cortex
ENSG00000130234.10	ACE2	chrX	15667361	C	A	b38	rs4830976	8.9e-17	0.6	Brain - Cortex
ENSG00000130234.10	ACE2	chrX	15667422	C	G	b38	rs4830544	8.9e-17	0.6	Brain - Cortex
ENSG00000130234.10	ACE2	chrX	15667464	C	T	b38	rs4830545	8.9e-17	0.6	Brain - Cortex
ENSG00000130234.10	ACE2	chrX	15671586	G	C	b38	rs1533363	8.9e-17	0.6	Brain - Cortex
ENSG00000130234.10	ACE2	chrX	15673559	C	A	b38	rs1554087	8.9e-17	0.6	Brain - Cortex
ENSG00000130234.10	ACE2	chrX	15673898	T	A	b38	rs5934262	8.9e-17	0.6	Brain - Cortex
ENSG00000130234.10	ACE2	chrX	15674316	A	C	b38	rs4830977	8.9e-17	0.6	Brain - Cortex
ENSG00000130234.10	ACE2	chrX	15674699	T	C	b38	rs4830978	8.9e-17	0.6	Brain - Cortex
ENSG00000130234.10	ACE2	chrX	15675244	A	G	b38	rs4830979	8.9e-17	0.6	Brain - Cortex
ENSG00000130234.10	ACE2	chrX	15675338	T	A	b38	rs4830980	8.9e-17	0.6	Brain - Cortex
ENSG00000130234.10	ACE2	chrX	15676066	A	C	b38	rs997294	8.9e-17	0.6	Brain - Cortex
ENSG00000130234.10	ACE2	chrX	15676490	T	C	b38	rs7065227	8.9e-17	0.6	Brain - Cortex
ENSG00000130234.10	ACE2	chrX	15676654	A	G	b38	rs10521649	8.9e-17	0.6	Brain - Cortex
ENSG00000130234.10	ACE2	chrX	15682840	G	A	b38	rs4830982	8.9e-17	0.6	Brain - Cortex
ENSG00000130234.10	ACE2	chrX	15685402	A	G	b38	rs6632710	8.9e-17	0.6	Brain - Cortex
ENSG00000130234.10	ACE2	chrX	15690021	G	A	b38	rs6527627	8.9e-17	0.6	Brain - Cortex
ENSG00000130234.10	ACE2	chrX	15694830	G	A	b38	rs4830987	8.9e-17	0.6	Brain - Cortex
ENSG00000130234.10	ACE2	chrX	15698680	A	T	b38	rs5936016	8.9e-17	0.6	Brain - Cortex
ENSG00000130234.10	ACE2	chrX	15698764	T	C	b38	rs5936017	8.9e-17	0.6	Brain - Cortex
ENSG00000130234.10	ACE2	chrX	15702202	A	G	b38	rs1877923	8.9e-17	0.6	Brain - Cortex
ENSG00000130234.10	ACE2	chrX	15702557	CTG	C	b38	rs35373086	8.9e-17	0.6	Brain - Cortex
ENSG00000130234.10	ACE2	chrX	15702600	C	T	b38	rs5934267	8.9e-17	0.6	Brain - Cortex
ENSG00000130234.10	ACE2	chrX	15707807	G	T	b38	rs2873135	8.9e-17	0.6	Brain - Cortex
ENSG00000130234.10	ACE2	chrX	15708300	C	T	b38	rs5936021	8.9e-17	0.6	Brain - Cortex
ENSG00000130234.10	ACE2	chrX	15709365	G	C	b38	rs4830546	8.9e-17	0.6	Brain - Cortex
ENSG00000130234.10	ACE2	chrX	15713217	T	C	b38	rs6527633	8.9e-17	0.6	Brain - Cortex
ENSG00000130234.10	ACE2	chrX	15713432	G	A	b38	rs1811781	8.9e-17	0.6	Brain - Cortex
ENSG00000130234.10	ACE2	chrX	15713496	G	T	b38	rs2012660	8.9e-17	0.6	Brain - Cortex
ENSG00000130234.10	ACE2	chrX	15715881	C	T	b38	rs5936026	8.9e-17	0.6	Brain - Cortex
ENSG00000130234.10	ACE2	chrX	15718136	C	G	b38	rs1849864	8.9e-17	0.6	Brain - Cortex
ENSG00000130234.10	ACE2	chrX	15599940	T	C	b38	rs1978124	9.5e-17	0.28	Nerve - Tibial
ENSG00000130234.10	ACE2	chrX	15626097	G	A	b38	rs2158082	1e-16	0.28	Nerve - Tibial
ENSG00000130234.10	ACE2	chrX	15655444	T	C	b38	rs4830971	1e-16	0.28	Nerve - Tibial
ENSG00000130234.10	ACE2	chrX	15655746	G	A	b38	rs4830972	1e-16	0.28	Nerve - Tibial
ENSG00000130234.10	ACE2	chrX	15654035	A	C	b38	rs5934257	1.1e-16	0.27	Nerve - Tibial
ENSG00000130234.10	ACE2	chrX	15693086	C	T	b38	rs1996225	1.2e-16	0.59	Brain - Frontal Cortex (BA9)
ENSG00000130234.10	ACE2	chrX	15688707	C	A	b38	rs4060	1.2e-16	0.59	Brain - Cortex
ENSG00000130234.10	ACE2	chrX	15695950	G	A	b38	rs5936013	1.2e-16	0.59	Brain - Cortex
ENSG00000130234.10	ACE2	chrX	15693086	C	T	b38	rs1996225	1.3e-16	0.59	Brain - Cortex
ENSG00000130234.10	ACE2	chrX	15607860	T	G	b38	rs5934250	1.5e-16	0.28	Nerve - Tibial
ENSG00000130234.10	ACE2	chrX	15624602	ATGGATTGTGTT	A	b38	rs66462812	1.5e-16	0.28	Nerve - Tibial
ENSG00000130234.10	ACE2	chrX	15676365	C	T	b38	rs997300	1.9e-16	0.26	Nerve - Tibial
ENSG00000130234.10	ACE2	chrX	15682709	T	C	b38	rs4830981	1.9e-16	0.26	Nerve - Tibial
ENSG00000130234.10	ACE2	chrX	15683622	A	T	b38	rs4830985	1.9e-16	0.26	Nerve - Tibial
ENSG00000130234.10	ACE2	chrX	15689209	GGCTT	G	b38	rs34093185	1.9e-16	0.26	Nerve - Tibial
ENSG00000130234.10	ACE2	chrX	15691078	A	T	b38	rs6632713	1.9e-16	0.26	Nerve - Tibial
ENSG00000130234.10	ACE2	chrX	15691331	T	C	b38	rs6629119	1.9e-16	0.26	Nerve - Tibial
ENSG00000130234.10	ACE2	chrX	15693789	T	G	b38	rs7062378	1.9e-16	0.26	Nerve - Tibial
ENSG00000130234.10	ACE2	chrX	15698322	A	G	b38	rs5936015	1.9e-16	0.26	Nerve - Tibial
ENSG00000130234.10	ACE2	chrX	15705881	A	G	b38	rs5934268	1.9e-16	0.26	Nerve - Tibial
ENSG00000130234.10	ACE2	chrX	15706752	A	G	b38	rs5936020	1.9e-16	0.26	Nerve - Tibial
ENSG00000130234.10	ACE2	chrX	15709854	G	A	b38	rs5936023	1.9e-16	0.26	Nerve - Tibial
ENSG00000130234.10	ACE2	chrX	15712496	G	A	b38	rs1515008	1.9e-16	0.26	Nerve - Tibial
ENSG00000130234.10	ACE2	chrX	15713643	C	G	b38	rs2012671	1.9e-16	0.26	Nerve - Tibial
ENSG00000130234.10	ACE2	chrX	15715871	A	G	b38	rs5934269	1.9e-16	0.26	Nerve - Tibial
ENSG00000130234.10	ACE2	chrX	15661440	G	C	b38	rs5934261	1.9e-16	0.26	Nerve - Tibial
ENSG00000130234.10	ACE2	chrX	15674766	C	G	b38	rs5936010	1.9e-16	0.26	Nerve - Tibial
ENSG00000130234.10	ACE2	chrX	15675427	G	GGGCGCGGTCCTTACGTGT	b38	rs200781818	2e-16	0.27	Nerve - Tibial
ENSG00000130234.10	ACE2	chrX	15612712	A	C	b38	rs6632680	2.4e-16	0.27	Nerve - Tibial
ENSG00000130234.10	ACE2	chrX	15675427	G	GGGCGCGGTCCTTACGTGT	b38	rs200781818	2.4e-16	0.59	Brain - Cortex
ENSG00000130234.10	ACE2	chrX	15682937	A	C	b38	rs4830983	3e-16	0.28	Nerve - Tibial
ENSG00000130234.10	ACE2	chrX	15679923	C	T	b38	rs5936011	3.2e-16	0.62	Brain - Nucleus accumbens (basal ganglia)
ENSG00000130234.10	ACE2	chrX	15682937	A	C	b38	rs4830983	3.2e-16	0.62	Brain - Nucleus accumbens (basal ganglia)
ENSG00000130234.10	ACE2	chrX	15700755	A	G	b38	rs5936018	3.2e-16	0.62	Brain - Nucleus accumbens (basal ganglia)
ENSG00000130234.10	ACE2	chrX	15705022	T	C	b38	rs5936019	3.2e-16	0.62	Brain - Nucleus accumbens (basal ganglia)
ENSG00000130234.10	ACE2	chrX	15626097	G	A	b38	rs2158082	3.6e-16	0.64	Brain - Cortex
ENSG00000130234.10	ACE2	chrX	15629578	A	G	b38	rs2106806	3.6e-16	0.64	Brain - Cortex
ENSG00000130234.10	ACE2	chrX	15655444	T	C	b38	rs4830971	3.6e-16	0.64	Brain - Cortex
ENSG00000130234.10	ACE2	chrX	15655746	G	A	b38	rs4830972	3.6e-16	0.64	Brain - Cortex
ENSG00000130234.10	ACE2	chrX	15675734	C	T	b38	rs5934263	4.4e-16	0.26	Nerve - Tibial
ENSG00000130234.10	ACE2	chrX	15663575	TAACA	T	b38	rs138992236	4.6e-16	0.26	Nerve - Tibial
ENSG00000130234.10	ACE2	chrX	15668176	C	A	b38	rs6632704	4.6e-16	0.26	Nerve - Tibial
ENSG00000130234.10	ACE2	chrX	15679923	C	T	b38	rs5936011	5.2e-16	0.27	Nerve - Tibial
ENSG00000130234.10	ACE2	chrX	15700755	A	G	b38	rs5936018	5.2e-16	0.27	Nerve - Tibial
ENSG00000130234.10	ACE2	chrX	15705022	T	C	b38	rs5936019	5.2e-16	0.27	Nerve - Tibial
ENSG00000130234.10	ACE2	chrX	15688707	C	A	b38	rs4060	5.7e-16	0.57	Brain - Nucleus accumbens (basal ganglia)
ENSG00000130234.10	ACE2	chrX	15695950	G	A	b38	rs5936013	5.7e-16	0.57	Brain - Nucleus accumbens (basal ganglia)
ENSG00000130234.10	ACE2	chrX	15612712	A	C	b38	rs6632680	7.6e-16	0.6	Brain - Cortex
ENSG00000130234.10	ACE2	chrX	15607860	T	G	b38	rs5934250	8.8e-16	0.63	Brain - Cortex
ENSG00000130234.10	ACE2	chrX	15624602	ATGGATTGTGTT	A	b38	rs66462812	8.8e-16	0.63	Brain - Cortex
ENSG00000130234.10	ACE2	chrX	15643040	A	G	b38	rs5934254	8.8e-16	0.63	Brain - Cortex
ENSG00000130234.10	ACE2	chrX	15646921	C	G	b38	rs5934256	8.8e-16	0.63	Brain - Cortex
ENSG00000130234.10	ACE2	chrX	15655180	C	T	b38	rs5934259	8.8e-16	0.63	Brain - Cortex
ENSG00000130234.10	ACE2	chrX	15658294	G	A	b38	rs4830974	9.4e-16	0.57	Brain - Nucleus accumbens (basal ganglia)
ENSG00000130234.10	ACE2	chrX	15660059	G	A	b38	rs4830975	9.4e-16	0.57	Brain - Nucleus accumbens (basal ganglia)
ENSG00000130234.10	ACE2	chrX	15666611	A	G	b38	rs5936007	9.4e-16	0.57	Brain - Nucleus accumbens (basal ganglia)
ENSG00000130234.10	ACE2	chrX	15667361	C	A	b38	rs4830976	9.4e-16	0.57	Brain - Nucleus accumbens (basal ganglia)
ENSG00000130234.10	ACE2	chrX	15667422	C	G	b38	rs4830544	9.4e-16	0.57	Brain - Nucleus accumbens (basal ganglia)
ENSG00000130234.10	ACE2	chrX	15667464	C	T	b38	rs4830545	9.4e-16	0.57	Brain - Nucleus accumbens (basal ganglia)
ENSG00000130234.10	ACE2	chrX	15671586	G	C	b38	rs1533363	9.4e-16	0.57	Brain - Nucleus accumbens (basal ganglia)
ENSG00000130234.10	ACE2	chrX	15673559	C	A	b38	rs1554087	9.4e-16	0.57	Brain - Nucleus accumbens (basal ganglia)
ENSG00000130234.10	ACE2	chrX	15673898	T	A	b38	rs5934262	9.4e-16	0.57	Brain - Nucleus accumbens (basal ganglia)
ENSG00000130234.10	ACE2	chrX	15674316	A	C	b38	rs4830977	9.4e-16	0.57	Brain - Nucleus accumbens (basal ganglia)
ENSG00000130234.10	ACE2	chrX	15674699	T	C	b38	rs4830978	9.4e-16	0.57	Brain - Nucleus accumbens (basal ganglia)
ENSG00000130234.10	ACE2	chrX	15675244	A	G	b38	rs4830979	9.4e-16	0.57	Brain - Nucleus accumbens (basal ganglia)
ENSG00000130234.10	ACE2	chrX	15675338	T	A	b38	rs4830980	9.4e-16	0.57	Brain - Nucleus accumbens (basal ganglia)
ENSG00000130234.10	ACE2	chrX	15676066	A	C	b38	rs997294	9.4e-16	0.57	Brain - Nucleus accumbens (basal ganglia)
ENSG00000130234.10	ACE2	chrX	15676490	T	C	b38	rs7065227	9.4e-16	0.57	Brain - Nucleus accumbens (basal ganglia)
ENSG00000130234.10	ACE2	chrX	15676654	A	G	b38	rs10521649	9.4e-16	0.57	Brain - Nucleus accumbens (basal ganglia)
ENSG00000130234.10	ACE2	chrX	15682840	G	A	b38	rs4830982	9.4e-16	0.57	Brain - Nucleus accumbens (basal ganglia)
ENSG00000130234.10	ACE2	chrX	15685402	A	G	b38	rs6632710	9.4e-16	0.57	Brain - Nucleus accumbens (basal ganglia)
ENSG00000130234.10	ACE2	chrX	15690021	G	A	b38	rs6527627	9.4e-16	0.57	Brain - Nucleus accumbens (basal ganglia)
ENSG00000130234.10	ACE2	chrX	15694830	G	A	b38	rs4830987	9.4e-16	0.57	Brain - Nucleus accumbens (basal ganglia)
ENSG00000130234.10	ACE2	chrX	15698680	A	T	b38	rs5936016	9.4e-16	0.57	Brain - Nucleus accumbens (basal ganglia)
ENSG00000130234.10	ACE2	chrX	15698764	T	C	b38	rs5936017	9.4e-16	0.57	Brain - Nucleus accumbens (basal ganglia)
ENSG00000130234.10	ACE2	chrX	15702202	A	G	b38	rs1877923	9.4e-16	0.57	Brain - Nucleus accumbens (basal ganglia)
ENSG00000130234.10	ACE2	chrX	15702557	CTG	C	b38	rs35373086	9.4e-16	0.57	Brain - Nucleus accumbens (basal ganglia)
ENSG00000130234.10	ACE2	chrX	15702600	C	T	b38	rs5934267	9.4e-16	0.57	Brain - Nucleus accumbens (basal ganglia)
ENSG00000130234.10	ACE2	chrX	15707807	G	T	b38	rs2873135	9.4e-16	0.57	Brain - Nucleus accumbens (basal ganglia)
ENSG00000130234.10	ACE2	chrX	15708300	C	T	b38	rs5936021	9.4e-16	0.57	Brain - Nucleus accumbens (basal ganglia)
ENSG00000130234.10	ACE2	chrX	15709365	G	C	b38	rs4830546	9.4e-16	0.57	Brain - Nucleus accumbens (basal ganglia)
ENSG00000130234.10	ACE2	chrX	15713217	T	C	b38	rs6527633	9.4e-16	0.57	Brain - Nucleus accumbens (basal ganglia)
ENSG00000130234.10	ACE2	chrX	15713432	G	A	b38	rs1811781	9.4e-16	0.57	Brain - Nucleus accumbens (basal ganglia)
ENSG00000130234.10	ACE2	chrX	15713496	G	T	b38	rs2012660	9.4e-16	0.57	Brain - Nucleus accumbens (basal ganglia)
ENSG00000130234.10	ACE2	chrX	15715881	C	T	b38	rs5936026	9.4e-16	0.57	Brain - Nucleus accumbens (basal ganglia)
ENSG00000130234.10	ACE2	chrX	15718136	C	G	b38	rs1849864	9.4e-16	0.57	Brain - Nucleus accumbens (basal ganglia)
ENSG00000130234.10	ACE2	chrX	15721189	C	T	b38	rs5936029	9.6e-16	0.6	Brain - Nucleus accumbens (basal ganglia)
ENSG00000130234.10	ACE2	chrX	15723284	A	C	b38	rs4830547	9.6e-16	0.6	Brain - Nucleus accumbens (basal ganglia)
ENSG00000130234.10	ACE2	chrX	15679923	C	T	b38	rs5936011	1.1e-15	0.6	Brain - Frontal Cortex (BA9)
ENSG00000130234.10	ACE2	chrX	15682937	A	C	b38	rs4830983	1.1e-15	0.6	Brain - Frontal Cortex (BA9)
ENSG00000130234.10	ACE2	chrX	15700755	A	G	b38	rs5936018	1.1e-15	0.6	Brain - Frontal Cortex (BA9)
ENSG00000130234.10	ACE2	chrX	15705022	T	C	b38	rs5936019	1.1e-15	0.6	Brain - Frontal Cortex (BA9)
ENSG00000130234.10	ACE2	chrX	15660010	C	T	b38	rs5934260	1.3e-15	0.58	Brain - Nucleus accumbens (basal ganglia)
ENSG00000130234.10	ACE2	chrX	15662833	C	A	b38	rs5936006	1.3e-15	0.58	Brain - Nucleus accumbens (basal ganglia)
ENSG00000130234.10	ACE2	chrX	15663053	A	T	b38	rs6632702	1.3e-15	0.58	Brain - Nucleus accumbens (basal ganglia)
ENSG00000130234.10	ACE2	chrX	15663897	G	T	b38	rs5978732	1.3e-15	0.58	Brain - Nucleus accumbens (basal ganglia)
ENSG00000130234.10	ACE2	chrX	15599940	T	C	b38	rs1978124	1.5e-15	0.62	Brain - Cortex
ENSG00000130234.10	ACE2	chrX	15626097	G	A	b38	rs2158082	1.6e-15	0.61	Brain - Nucleus accumbens (basal ganglia)
ENSG00000130234.10	ACE2	chrX	15643040	A	G	b38	rs5934254	1.6e-15	0.61	Brain - Nucleus accumbens (basal ganglia)
ENSG00000130234.10	ACE2	chrX	15646921	C	G	b38	rs5934256	1.6e-15	0.61	Brain - Nucleus accumbens (basal ganglia)
ENSG00000130234.10	ACE2	chrX	15655180	C	T	b38	rs5934259	1.6e-15	0.61	Brain - Nucleus accumbens (basal ganglia)
ENSG00000130234.10	ACE2	chrX	15655444	T	C	b38	rs4830971	1.6e-15	0.61	Brain - Nucleus accumbens (basal ganglia)
ENSG00000130234.10	ACE2	chrX	15655746	G	A	b38	rs4830972	1.6e-15	0.61	Brain - Nucleus accumbens (basal ganglia)
ENSG00000130234.10	ACE2	chrX	15682937	A	C	b38	rs4830983	1.7e-15	0.61	Brain - Cortex
ENSG00000130234.10	ACE2	chrX	15612712	A	C	b38	rs6632680	1.9e-15	0.57	Brain - Frontal Cortex (BA9)
ENSG00000130234.10	ACE2	chrX	15599940	T	C	b38	rs1978124	1.9e-15	0.6	Brain - Nucleus accumbens (basal ganglia)
ENSG00000130234.10	ACE2	chrX	15693086	C	T	b38	rs1996225	2.5e-15	0.56	Brain - Nucleus accumbens (basal ganglia)
ENSG00000130234.10	ACE2	chrX	15625554	GA	G	b38	rs56369428	2.6e-15	0.58	Brain - Cortex
ENSG00000130234.10	ACE2	chrX	15625156	T	C	b38	rs6629110	3.4e-15	0.25	Nerve - Tibial
ENSG00000130234.10	ACE2	chrX	15625554	GA	G	b38	rs56369428	3.4e-15	0.25	Nerve - Tibial
ENSG00000130234.10	ACE2	chrX	15660010	C	T	b38	rs5934260	3.5e-15	0.58	Brain - Cortex
ENSG00000130234.10	ACE2	chrX	15662833	C	A	b38	rs5936006	3.5e-15	0.58	Brain - Cortex
ENSG00000130234.10	ACE2	chrX	15663053	A	T	b38	rs6632702	3.5e-15	0.58	Brain - Cortex
ENSG00000130234.10	ACE2	chrX	15663897	G	T	b38	rs5978732	3.5e-15	0.58	Brain - Cortex
ENSG00000130234.10	ACE2	chrX	15679923	C	T	b38	rs5936011	4e-15	0.6	Brain - Cortex
ENSG00000130234.10	ACE2	chrX	15700755	A	G	b38	rs5936018	4e-15	0.6	Brain - Cortex
ENSG00000130234.10	ACE2	chrX	15705022	T	C	b38	rs5936019	4e-15	0.6	Brain - Cortex
ENSG00000130234.10	ACE2	chrX	15607860	T	G	b38	rs5934250	8.3e-15	0.59	Brain - Nucleus accumbens (basal ganglia)
ENSG00000130234.10	ACE2	chrX	15624602	ATGGATTGTGTT	A	b38	rs66462812	8.3e-15	0.59	Brain - Nucleus accumbens (basal ganglia)
ENSG00000130234.10	ACE2	chrX	15629578	A	G	b38	rs2106806	8.3e-15	0.59	Brain - Nucleus accumbens (basal ganglia)
ENSG00000130234.10	ACE2	chrX	15625554	GA	G	b38	rs56369428	9.5e-15	0.56	Brain - Nucleus accumbens (basal ganglia)
ENSG00000130234.10	ACE2	chrX	15626097	G	A	b38	rs2158082	1e-14	0.59	Brain - Frontal Cortex (BA9)
ENSG00000130234.10	ACE2	chrX	15643040	A	G	b38	rs5934254	1e-14	0.59	Brain - Frontal Cortex (BA9)
ENSG00000130234.10	ACE2	chrX	15646921	C	G	b38	rs5934256	1e-14	0.59	Brain - Frontal Cortex (BA9)
ENSG00000130234.10	ACE2	chrX	15655180	C	T	b38	rs5934259	1e-14	0.59	Brain - Frontal Cortex (BA9)
ENSG00000130234.10	ACE2	chrX	15655444	T	C	b38	rs4830971	1e-14	0.59	Brain - Frontal Cortex (BA9)
ENSG00000130234.10	ACE2	chrX	15655746	G	A	b38	rs4830972	1e-14	0.59	Brain - Frontal Cortex (BA9)
ENSG00000130234.10	ACE2	chrX	15675427	G	GGGCGCGGTCCTTACGTGT	b38	rs200781818	1.1e-14	0.56	Brain - Nucleus accumbens (basal ganglia)
ENSG00000130234.10	ACE2	chrX	15599940	T	C	b38	rs1978124	1.2e-14	0.59	Brain - Frontal Cortex (BA9)
ENSG00000130234.10	ACE2	chrX	15723284	A	C	b38	rs4830547	1.2e-14	0.26	Nerve - Tibial
ENSG00000130234.10	ACE2	chrX	15721189	C	T	b38	rs5936029	1.4e-14	0.26	Nerve - Tibial
ENSG00000130234.10	ACE2	chrX	15668176	C	A	b38	rs6632704	1.8e-14	0.55	Brain - Cortex
ENSG00000130234.10	ACE2	chrX	15674766	C	G	b38	rs5936010	1.8e-14	0.55	Brain - Cortex
ENSG00000130234.10	ACE2	chrX	15675734	C	T	b38	rs5934263	1.8e-14	0.55	Brain - Cortex
ENSG00000130234.10	ACE2	chrX	15676365	C	T	b38	rs997300	1.8e-14	0.55	Brain - Cortex
ENSG00000130234.10	ACE2	chrX	15682709	T	C	b38	rs4830981	1.8e-14	0.55	Brain - Cortex
ENSG00000130234.10	ACE2	chrX	15683622	A	T	b38	rs4830985	1.8e-14	0.55	Brain - Cortex
ENSG00000130234.10	ACE2	chrX	15689209	GGCTT	G	b38	rs34093185	1.8e-14	0.55	Brain - Cortex
ENSG00000130234.10	ACE2	chrX	15691078	A	T	b38	rs6632713	1.8e-14	0.55	Brain - Cortex
ENSG00000130234.10	ACE2	chrX	15691331	T	C	b38	rs6629119	1.8e-14	0.55	Brain - Cortex
ENSG00000130234.10	ACE2	chrX	15693789	T	G	b38	rs7062378	1.8e-14	0.55	Brain - Cortex
ENSG00000130234.10	ACE2	chrX	15698322	A	G	b38	rs5936015	1.8e-14	0.55	Brain - Cortex
ENSG00000130234.10	ACE2	chrX	15705881	A	G	b38	rs5934268	1.8e-14	0.55	Brain - Cortex
ENSG00000130234.10	ACE2	chrX	15706752	A	G	b38	rs5936020	1.8e-14	0.55	Brain - Cortex
ENSG00000130234.10	ACE2	chrX	15709854	G	A	b38	rs5936023	1.8e-14	0.55	Brain - Cortex
ENSG00000130234.10	ACE2	chrX	15712496	G	A	b38	rs1515008	1.8e-14	0.55	Brain - Cortex
ENSG00000130234.10	ACE2	chrX	15713643	C	G	b38	rs2012671	1.8e-14	0.55	Brain - Cortex
ENSG00000130234.10	ACE2	chrX	15715871	A	G	b38	rs5934269	1.8e-14	0.55	Brain - Cortex
ENSG00000130234.10	ACE2	chrX	15625156	T	C	b38	rs6629110	2.3e-14	0.55	Brain - Nucleus accumbens (basal ganglia)
ENSG00000130234.10	ACE2	chrX	15668176	C	A	b38	rs6632704	2.5e-14	0.55	Brain - Nucleus accumbens (basal ganglia)
ENSG00000130234.10	ACE2	chrX	15674766	C	G	b38	rs5936010	2.5e-14	0.55	Brain - Nucleus accumbens (basal ganglia)
ENSG00000130234.10	ACE2	chrX	15675734	C	T	b38	rs5934263	2.5e-14	0.55	Brain - Nucleus accumbens (basal ganglia)
ENSG00000130234.10	ACE2	chrX	15676365	C	T	b38	rs997300	2.5e-14	0.55	Brain - Nucleus accumbens (basal ganglia)
ENSG00000130234.10	ACE2	chrX	15682709	T	C	b38	rs4830981	2.5e-14	0.55	Brain - Nucleus accumbens (basal ganglia)
ENSG00000130234.10	ACE2	chrX	15683622	A	T	b38	rs4830985	2.5e-14	0.55	Brain - Nucleus accumbens (basal ganglia)
ENSG00000130234.10	ACE2	chrX	15689209	GGCTT	G	b38	rs34093185	2.5e-14	0.55	Brain - Nucleus accumbens (basal ganglia)
ENSG00000130234.10	ACE2	chrX	15691078	A	T	b38	rs6632713	2.5e-14	0.55	Brain - Nucleus accumbens (basal ganglia)
ENSG00000130234.10	ACE2	chrX	15691331	T	C	b38	rs6629119	2.5e-14	0.55	Brain - Nucleus accumbens (basal ganglia)
ENSG00000130234.10	ACE2	chrX	15693789	T	G	b38	rs7062378	2.5e-14	0.55	Brain - Nucleus accumbens (basal ganglia)
ENSG00000130234.10	ACE2	chrX	15698322	A	G	b38	rs5936015	2.5e-14	0.55	Brain - Nucleus accumbens (basal ganglia)
ENSG00000130234.10	ACE2	chrX	15705881	A	G	b38	rs5934268	2.5e-14	0.55	Brain - Nucleus accumbens (basal ganglia)
ENSG00000130234.10	ACE2	chrX	15706752	A	G	b38	rs5936020	2.5e-14	0.55	Brain - Nucleus accumbens (basal ganglia)
ENSG00000130234.10	ACE2	chrX	15709854	G	A	b38	rs5936023	2.5e-14	0.55	Brain - Nucleus accumbens (basal ganglia)
ENSG00000130234.10	ACE2	chrX	15712496	G	A	b38	rs1515008	2.5e-14	0.55	Brain - Nucleus accumbens (basal ganglia)
ENSG00000130234.10	ACE2	chrX	15713643	C	G	b38	rs2012671	2.5e-14	0.55	Brain - Nucleus accumbens (basal ganglia)
ENSG00000130234.10	ACE2	chrX	15715871	A	G	b38	rs5934269	2.5e-14	0.55	Brain - Nucleus accumbens (basal ganglia)
ENSG00000130234.10	ACE2	chrX	15599613	G	A	b38	rs4646120	2.9e-14	0.25	Nerve - Tibial
ENSG00000130234.10	ACE2	chrX	15668176	C	A	b38	rs6632704	3.4e-14	0.54	Brain - Frontal Cortex (BA9)
ENSG00000130234.10	ACE2	chrX	15674766	C	G	b38	rs5936010	3.4e-14	0.54	Brain - Frontal Cortex (BA9)
ENSG00000130234.10	ACE2	chrX	15675734	C	T	b38	rs5934263	3.4e-14	0.54	Brain - Frontal Cortex (BA9)
ENSG00000130234.10	ACE2	chrX	15676365	C	T	b38	rs997300	3.4e-14	0.54	Brain - Frontal Cortex (BA9)
ENSG00000130234.10	ACE2	chrX	15682709	T	C	b38	rs4830981	3.4e-14	0.54	Brain - Frontal Cortex (BA9)
ENSG00000130234.10	ACE2	chrX	15683622	A	T	b38	rs4830985	3.4e-14	0.54	Brain - Frontal Cortex (BA9)
ENSG00000130234.10	ACE2	chrX	15689209	GGCTT	G	b38	rs34093185	3.4e-14	0.54	Brain - Frontal Cortex (BA9)
ENSG00000130234.10	ACE2	chrX	15691078	A	T	b38	rs6632713	3.4e-14	0.54	Brain - Frontal Cortex (BA9)
ENSG00000130234.10	ACE2	chrX	15691331	T	C	b38	rs6629119	3.4e-14	0.54	Brain - Frontal Cortex (BA9)
ENSG00000130234.10	ACE2	chrX	15693789	T	G	b38	rs7062378	3.4e-14	0.54	Brain - Frontal Cortex (BA9)
ENSG00000130234.10	ACE2	chrX	15698322	A	G	b38	rs5936015	3.4e-14	0.54	Brain - Frontal Cortex (BA9)
ENSG00000130234.10	ACE2	chrX	15705881	A	G	b38	rs5934268	3.4e-14	0.54	Brain - Frontal Cortex (BA9)
ENSG00000130234.10	ACE2	chrX	15706752	A	G	b38	rs5936020	3.4e-14	0.54	Brain - Frontal Cortex (BA9)
ENSG00000130234.10	ACE2	chrX	15709854	G	A	b38	rs5936023	3.4e-14	0.54	Brain - Frontal Cortex (BA9)
ENSG00000130234.10	ACE2	chrX	15712496	G	A	b38	rs1515008	3.4e-14	0.54	Brain - Frontal Cortex (BA9)
ENSG00000130234.10	ACE2	chrX	15713643	C	G	b38	rs2012671	3.4e-14	0.54	Brain - Frontal Cortex (BA9)
ENSG00000130234.10	ACE2	chrX	15715871	A	G	b38	rs5934269	3.4e-14	0.54	Brain - Frontal Cortex (BA9)
ENSG00000130234.10	ACE2	chrX	15607860	T	G	b38	rs5934250	3.6e-14	0.58	Brain - Frontal Cortex (BA9)
ENSG00000130234.10	ACE2	chrX	15624602	ATGGATTGTGTT	A	b38	rs66462812	3.6e-14	0.58	Brain - Frontal Cortex (BA9)
ENSG00000130234.10	ACE2	chrX	15629578	A	G	b38	rs2106806	3.6e-14	0.58	Brain - Frontal Cortex (BA9)
ENSG00000130234.10	ACE2	chrX	15612712	A	C	b38	rs6632680	3.7e-14	0.55	Brain - Nucleus accumbens (basal ganglia)
ENSG00000130234.10	ACE2	chrX	15661440	G	C	b38	rs5934261	5.3e-14	0.54	Brain - Nucleus accumbens (basal ganglia)
ENSG00000130234.10	ACE2	chrX	15663575	TAACA	T	b38	rs138992236	5.3e-14	0.54	Brain - Nucleus accumbens (basal ganglia)
ENSG00000130234.10	ACE2	chrX	15625554	GA	G	b38	rs56369428	6.2e-14	0.54	Brain - Frontal Cortex (BA9)
ENSG00000130234.10	ACE2	chrX	15661440	G	C	b38	rs5934261	7.3e-14	0.53	Brain - Frontal Cortex (BA9)
ENSG00000130234.10	ACE2	chrX	15663575	TAACA	T	b38	rs138992236	7.3e-14	0.53	Brain - Frontal Cortex (BA9)
ENSG00000130234.10	ACE2	chrX	15654035	A	C	b38	rs5934257	1.1e-13	0.56	Brain - Nucleus accumbens (basal ganglia)
ENSG00000130234.10	ACE2	chrX	15625156	T	C	b38	rs6629110	1.4e-13	0.53	Brain - Frontal Cortex (BA9)
ENSG00000130234.10	ACE2	chrX	15654035	A	C	b38	rs5934257	1.6e-13	0.55	Brain - Frontal Cortex (BA9)
ENSG00000130234.10	ACE2	chrX	15625156	T	C	b38	rs6629110	1.6e-13	0.54	Brain - Cortex
ENSG00000130234.10	ACE2	chrX	15654035	A	C	b38	rs5934257	3.9e-13	0.56	Brain - Cortex
ENSG00000130234.10	ACE2	chrX	15723284	A	C	b38	rs4830547	4.5e-13	0.57	Brain - Cortex
ENSG00000130234.10	ACE2	chrX	15599613	G	A	b38	rs4646120	6.1e-13	0.53	Brain - Nucleus accumbens (basal ganglia)
ENSG00000130234.10	ACE2	chrX	15675427	G	GGGCGCGGTCCTTACGTGT	b38	rs200781818	6.3e-13	0.49	Brain - Caudate (basal ganglia)
ENSG00000130234.10	ACE2	chrX	15661440	G	C	b38	rs5934261	8.4e-13	0.52	Brain - Cortex
ENSG00000130234.10	ACE2	chrX	15663575	TAACA	T	b38	rs138992236	8.4e-13	0.52	Brain - Cortex
ENSG00000130234.10	ACE2	chrX	15721189	C	T	b38	rs5936029	1e-12	0.56	Brain - Cortex
ENSG00000130234.10	ACE2	chrX	15599613	G	A	b38	rs4646120	1.3e-12	0.53	Brain - Cortex
ENSG00000130234.10	ACE2	chrX	15599613	G	A	b38	rs4646120	1.6e-12	0.53	Brain - Frontal Cortex (BA9)
ENSG00000130234.10	ACE2	chrX	15658294	G	A	b38	rs4830974	2e-12	0.48	Brain - Caudate (basal ganglia)
ENSG00000130234.10	ACE2	chrX	15660059	G	A	b38	rs4830975	2e-12	0.48	Brain - Caudate (basal ganglia)
ENSG00000130234.10	ACE2	chrX	15666611	A	G	b38	rs5936007	2e-12	0.48	Brain - Caudate (basal ganglia)
ENSG00000130234.10	ACE2	chrX	15667361	C	A	b38	rs4830976	2e-12	0.48	Brain - Caudate (basal ganglia)
ENSG00000130234.10	ACE2	chrX	15667422	C	G	b38	rs4830544	2e-12	0.48	Brain - Caudate (basal ganglia)
ENSG00000130234.10	ACE2	chrX	15667464	C	T	b38	rs4830545	2e-12	0.48	Brain - Caudate (basal ganglia)
ENSG00000130234.10	ACE2	chrX	15671586	G	C	b38	rs1533363	2e-12	0.48	Brain - Caudate (basal ganglia)
ENSG00000130234.10	ACE2	chrX	15673559	C	A	b38	rs1554087	2e-12	0.48	Brain - Caudate (basal ganglia)
ENSG00000130234.10	ACE2	chrX	15673898	T	A	b38	rs5934262	2e-12	0.48	Brain - Caudate (basal ganglia)
ENSG00000130234.10	ACE2	chrX	15674316	A	C	b38	rs4830977	2e-12	0.48	Brain - Caudate (basal ganglia)
ENSG00000130234.10	ACE2	chrX	15674699	T	C	b38	rs4830978	2e-12	0.48	Brain - Caudate (basal ganglia)
ENSG00000130234.10	ACE2	chrX	15675244	A	G	b38	rs4830979	2e-12	0.48	Brain - Caudate (basal ganglia)
ENSG00000130234.10	ACE2	chrX	15675338	T	A	b38	rs4830980	2e-12	0.48	Brain - Caudate (basal ganglia)
ENSG00000130234.10	ACE2	chrX	15676066	A	C	b38	rs997294	2e-12	0.48	Brain - Caudate (basal ganglia)
ENSG00000130234.10	ACE2	chrX	15676490	T	C	b38	rs7065227	2e-12	0.48	Brain - Caudate (basal ganglia)
ENSG00000130234.10	ACE2	chrX	15676654	A	G	b38	rs10521649	2e-12	0.48	Brain - Caudate (basal ganglia)
ENSG00000130234.10	ACE2	chrX	15682840	G	A	b38	rs4830982	2e-12	0.48	Brain - Caudate (basal ganglia)
ENSG00000130234.10	ACE2	chrX	15685402	A	G	b38	rs6632710	2e-12	0.48	Brain - Caudate (basal ganglia)
ENSG00000130234.10	ACE2	chrX	15690021	G	A	b38	rs6527627	2e-12	0.48	Brain - Caudate (basal ganglia)
ENSG00000130234.10	ACE2	chrX	15694830	G	A	b38	rs4830987	2e-12	0.48	Brain - Caudate (basal ganglia)
ENSG00000130234.10	ACE2	chrX	15698680	A	T	b38	rs5936016	2e-12	0.48	Brain - Caudate (basal ganglia)
ENSG00000130234.10	ACE2	chrX	15698764	T	C	b38	rs5936017	2e-12	0.48	Brain - Caudate (basal ganglia)
ENSG00000130234.10	ACE2	chrX	15702202	A	G	b38	rs1877923	2e-12	0.48	Brain - Caudate (basal ganglia)
ENSG00000130234.10	ACE2	chrX	15702557	CTG	C	b38	rs35373086	2e-12	0.48	Brain - Caudate (basal ganglia)
ENSG00000130234.10	ACE2	chrX	15702600	C	T	b38	rs5934267	2e-12	0.48	Brain - Caudate (basal ganglia)
ENSG00000130234.10	ACE2	chrX	15707807	G	T	b38	rs2873135	2e-12	0.48	Brain - Caudate (basal ganglia)
ENSG00000130234.10	ACE2	chrX	15708300	C	T	b38	rs5936021	2e-12	0.48	Brain - Caudate (basal ganglia)
ENSG00000130234.10	ACE2	chrX	15709365	G	C	b38	rs4830546	2e-12	0.48	Brain - Caudate (basal ganglia)
ENSG00000130234.10	ACE2	chrX	15713217	T	C	b38	rs6527633	2e-12	0.48	Brain - Caudate (basal ganglia)
ENSG00000130234.10	ACE2	chrX	15713432	G	A	b38	rs1811781	2e-12	0.48	Brain - Caudate (basal ganglia)
ENSG00000130234.10	ACE2	chrX	15713496	G	T	b38	rs2012660	2e-12	0.48	Brain - Caudate (basal ganglia)
ENSG00000130234.10	ACE2	chrX	15715881	C	T	b38	rs5936026	2e-12	0.48	Brain - Caudate (basal ganglia)
ENSG00000130234.10	ACE2	chrX	15718136	C	G	b38	rs1849864	2e-12	0.48	Brain - Caudate (basal ganglia)
ENSG00000130234.10	ACE2	chrX	15693086	C	T	b38	rs1996225	2.1e-12	0.48	Brain - Caudate (basal ganglia)
ENSG00000130234.10	ACE2	chrX	15688707	C	A	b38	rs4060	3e-12	0.47	Brain - Caudate (basal ganglia)
ENSG00000130234.10	ACE2	chrX	15695950	G	A	b38	rs5936013	3e-12	0.47	Brain - Caudate (basal ganglia)
ENSG00000130234.10	ACE2	chrX	15660010	C	T	b38	rs5934260	3.9e-12	0.47	Brain - Caudate (basal ganglia)
ENSG00000130234.10	ACE2	chrX	15662833	C	A	b38	rs5936006	3.9e-12	0.47	Brain - Caudate (basal ganglia)
ENSG00000130234.10	ACE2	chrX	15663053	A	T	b38	rs6632702	3.9e-12	0.47	Brain - Caudate (basal ganglia)
ENSG00000130234.10	ACE2	chrX	15663897	G	T	b38	rs5978732	3.9e-12	0.47	Brain - Caudate (basal ganglia)
ENSG00000130234.10	ACE2	chrX	15682937	A	C	b38	rs4830983	6.4e-12	0.5	Brain - Caudate (basal ganglia)
ENSG00000130234.10	ACE2	chrX	15679923	C	T	b38	rs5936011	1.4e-11	0.49	Brain - Caudate (basal ganglia)
ENSG00000130234.10	ACE2	chrX	15700755	A	G	b38	rs5936018	1.4e-11	0.49	Brain - Caudate (basal ganglia)
ENSG00000130234.10	ACE2	chrX	15705022	T	C	b38	rs5936019	1.4e-11	0.49	Brain - Caudate (basal ganglia)
ENSG00000130234.10	ACE2	chrX	15721189	C	T	b38	rs5936029	1.6e-11	0.53	Brain - Frontal Cortex (BA9)
ENSG00000130234.10	ACE2	chrX	15723284	A	C	b38	rs4830547	1.6e-11	0.53	Brain - Frontal Cortex (BA9)
ENSG00000130234.10	ACE2	chrX	15688707	C	A	b38	rs4060	3.6e-11	0.53	Brain - Putamen (basal ganglia)
ENSG00000130234.10	ACE2	chrX	15695950	G	A	b38	rs5936013	3.6e-11	0.53	Brain - Putamen (basal ganglia)
ENSG00000130234.10	ACE2	chrX	15675427	G	GGGCGCGGTCCTTACGTGT	b38	rs200781818	3.6e-11	0.53	Brain - Putamen (basal ganglia)
ENSG00000130234.10	ACE2	chrX	15668176	C	A	b38	rs6632704	7.8e-11	0.44	Brain - Caudate (basal ganglia)
ENSG00000130234.10	ACE2	chrX	15674766	C	G	b38	rs5936010	7.8e-11	0.44	Brain - Caudate (basal ganglia)
ENSG00000130234.10	ACE2	chrX	15675734	C	T	b38	rs5934263	7.8e-11	0.44	Brain - Caudate (basal ganglia)
ENSG00000130234.10	ACE2	chrX	15676365	C	T	b38	rs997300	7.8e-11	0.44	Brain - Caudate (basal ganglia)
ENSG00000130234.10	ACE2	chrX	15682709	T	C	b38	rs4830981	7.8e-11	0.44	Brain - Caudate (basal ganglia)
ENSG00000130234.10	ACE2	chrX	15683622	A	T	b38	rs4830985	7.8e-11	0.44	Brain - Caudate (basal ganglia)
ENSG00000130234.10	ACE2	chrX	15689209	GGCTT	G	b38	rs34093185	7.8e-11	0.44	Brain - Caudate (basal ganglia)
ENSG00000130234.10	ACE2	chrX	15691078	A	T	b38	rs6632713	7.8e-11	0.44	Brain - Caudate (basal ganglia)
ENSG00000130234.10	ACE2	chrX	15691331	T	C	b38	rs6629119	7.8e-11	0.44	Brain - Caudate (basal ganglia)
ENSG00000130234.10	ACE2	chrX	15693789	T	G	b38	rs7062378	7.8e-11	0.44	Brain - Caudate (basal ganglia)
ENSG00000130234.10	ACE2	chrX	15698322	A	G	b38	rs5936015	7.8e-11	0.44	Brain - Caudate (basal ganglia)
ENSG00000130234.10	ACE2	chrX	15705881	A	G	b38	rs5934268	7.8e-11	0.44	Brain - Caudate (basal ganglia)
ENSG00000130234.10	ACE2	chrX	15706752	A	G	b38	rs5936020	7.8e-11	0.44	Brain - Caudate (basal ganglia)
ENSG00000130234.10	ACE2	chrX	15709854	G	A	b38	rs5936023	7.8e-11	0.44	Brain - Caudate (basal ganglia)
ENSG00000130234.10	ACE2	chrX	15712496	G	A	b38	rs1515008	7.8e-11	0.44	Brain - Caudate (basal ganglia)
ENSG00000130234.10	ACE2	chrX	15713643	C	G	b38	rs2012671	7.8e-11	0.44	Brain - Caudate (basal ganglia)
ENSG00000130234.10	ACE2	chrX	15715871	A	G	b38	rs5934269	7.8e-11	0.44	Brain - Caudate (basal ganglia)
ENSG00000130234.10	ACE2	chrX	15658294	G	A	b38	rs4830974	8.5e-11	0.52	Brain - Putamen (basal ganglia)
ENSG00000130234.10	ACE2	chrX	15660059	G	A	b38	rs4830975	8.5e-11	0.52	Brain - Putamen (basal ganglia)
ENSG00000130234.10	ACE2	chrX	15666611	A	G	b38	rs5936007	8.5e-11	0.52	Brain - Putamen (basal ganglia)
ENSG00000130234.10	ACE2	chrX	15667361	C	A	b38	rs4830976	8.5e-11	0.52	Brain - Putamen (basal ganglia)
ENSG00000130234.10	ACE2	chrX	15667422	C	G	b38	rs4830544	8.5e-11	0.52	Brain - Putamen (basal ganglia)
ENSG00000130234.10	ACE2	chrX	15667464	C	T	b38	rs4830545	8.5e-11	0.52	Brain - Putamen (basal ganglia)
ENSG00000130234.10	ACE2	chrX	15671586	G	C	b38	rs1533363	8.5e-11	0.52	Brain - Putamen (basal ganglia)
ENSG00000130234.10	ACE2	chrX	15673559	C	A	b38	rs1554087	8.5e-11	0.52	Brain - Putamen (basal ganglia)
ENSG00000130234.10	ACE2	chrX	15673898	T	A	b38	rs5934262	8.5e-11	0.52	Brain - Putamen (basal ganglia)
ENSG00000130234.10	ACE2	chrX	15674316	A	C	b38	rs4830977	8.5e-11	0.52	Brain - Putamen (basal ganglia)
ENSG00000130234.10	ACE2	chrX	15674699	T	C	b38	rs4830978	8.5e-11	0.52	Brain - Putamen (basal ganglia)
ENSG00000130234.10	ACE2	chrX	15675244	A	G	b38	rs4830979	8.5e-11	0.52	Brain - Putamen (basal ganglia)
ENSG00000130234.10	ACE2	chrX	15675338	T	A	b38	rs4830980	8.5e-11	0.52	Brain - Putamen (basal ganglia)
ENSG00000130234.10	ACE2	chrX	15676066	A	C	b38	rs997294	8.5e-11	0.52	Brain - Putamen (basal ganglia)
ENSG00000130234.10	ACE2	chrX	15676490	T	C	b38	rs7065227	8.5e-11	0.52	Brain - Putamen (basal ganglia)
ENSG00000130234.10	ACE2	chrX	15676654	A	G	b38	rs10521649	8.5e-11	0.52	Brain - Putamen (basal ganglia)
ENSG00000130234.10	ACE2	chrX	15682840	G	A	b38	rs4830982	8.5e-11	0.52	Brain - Putamen (basal ganglia)
ENSG00000130234.10	ACE2	chrX	15685402	A	G	b38	rs6632710	8.5e-11	0.52	Brain - Putamen (basal ganglia)
ENSG00000130234.10	ACE2	chrX	15690021	G	A	b38	rs6527627	8.5e-11	0.52	Brain - Putamen (basal ganglia)
ENSG00000130234.10	ACE2	chrX	15694830	G	A	b38	rs4830987	8.5e-11	0.52	Brain - Putamen (basal ganglia)
ENSG00000130234.10	ACE2	chrX	15698680	A	T	b38	rs5936016	8.5e-11	0.52	Brain - Putamen (basal ganglia)
ENSG00000130234.10	ACE2	chrX	15698764	T	C	b38	rs5936017	8.5e-11	0.52	Brain - Putamen (basal ganglia)
ENSG00000130234.10	ACE2	chrX	15702202	A	G	b38	rs1877923	8.5e-11	0.52	Brain - Putamen (basal ganglia)
ENSG00000130234.10	ACE2	chrX	15702557	CTG	C	b38	rs35373086	8.5e-11	0.52	Brain - Putamen (basal ganglia)
ENSG00000130234.10	ACE2	chrX	15702600	C	T	b38	rs5934267	8.5e-11	0.52	Brain - Putamen (basal ganglia)
ENSG00000130234.10	ACE2	chrX	15707807	G	T	b38	rs2873135	8.5e-11	0.52	Brain - Putamen (basal ganglia)
ENSG00000130234.10	ACE2	chrX	15708300	C	T	b38	rs5936021	8.5e-11	0.52	Brain - Putamen (basal ganglia)
ENSG00000130234.10	ACE2	chrX	15709365	G	C	b38	rs4830546	8.5e-11	0.52	Brain - Putamen (basal ganglia)
ENSG00000130234.10	ACE2	chrX	15713217	T	C	b38	rs6527633	8.5e-11	0.52	Brain - Putamen (basal ganglia)
ENSG00000130234.10	ACE2	chrX	15713432	G	A	b38	rs1811781	8.5e-11	0.52	Brain - Putamen (basal ganglia)
ENSG00000130234.10	ACE2	chrX	15713496	G	T	b38	rs2012660	8.5e-11	0.52	Brain - Putamen (basal ganglia)
ENSG00000130234.10	ACE2	chrX	15715881	C	T	b38	rs5936026	8.5e-11	0.52	Brain - Putamen (basal ganglia)
ENSG00000130234.10	ACE2	chrX	15718136	C	G	b38	rs1849864	8.5e-11	0.52	Brain - Putamen (basal ganglia)
ENSG00000130234.10	ACE2	chrX	15612712	A	C	b38	rs6632680	1.8e-10	0.44	Brain - Caudate (basal ganglia)
ENSG00000130234.10	ACE2	chrX	15661440	G	C	b38	rs5934261	2e-10	0.43	Brain - Caudate (basal ganglia)
ENSG00000130234.10	ACE2	chrX	15663575	TAACA	T	b38	rs138992236	2e-10	0.43	Brain - Caudate (basal ganglia)
ENSG00000130234.10	ACE2	chrX	15693086	C	T	b38	rs1996225	2.1e-10	0.51	Brain - Putamen (basal ganglia)
ENSG00000130234.10	ACE2	chrX	15626097	G	A	b38	rs2158082	2.7e-10	0.47	Brain - Caudate (basal ganglia)
ENSG00000130234.10	ACE2	chrX	15655444	T	C	b38	rs4830971	2.7e-10	0.47	Brain - Caudate (basal ganglia)
ENSG00000130234.10	ACE2	chrX	15655746	G	A	b38	rs4830972	2.7e-10	0.47	Brain - Caudate (basal ganglia)
ENSG00000130234.10	ACE2	chrX	15693086	C	T	b38	rs1996225	4.3e-10	0.45	Brain - Cerebellum
ENSG00000130234.10	ACE2	chrX	15658294	G	A	b38	rs4830974	4.7e-10	0.45	Brain - Cerebellum
ENSG00000130234.10	ACE2	chrX	15660059	G	A	b38	rs4830975	4.7e-10	0.45	Brain - Cerebellum
ENSG00000130234.10	ACE2	chrX	15666611	A	G	b38	rs5936007	4.7e-10	0.45	Brain - Cerebellum
ENSG00000130234.10	ACE2	chrX	15667361	C	A	b38	rs4830976	4.7e-10	0.45	Brain - Cerebellum
ENSG00000130234.10	ACE2	chrX	15667422	C	G	b38	rs4830544	4.7e-10	0.45	Brain - Cerebellum
ENSG00000130234.10	ACE2	chrX	15667464	C	T	b38	rs4830545	4.7e-10	0.45	Brain - Cerebellum
ENSG00000130234.10	ACE2	chrX	15671586	G	C	b38	rs1533363	4.7e-10	0.45	Brain - Cerebellum
ENSG00000130234.10	ACE2	chrX	15673559	C	A	b38	rs1554087	4.7e-10	0.45	Brain - Cerebellum
ENSG00000130234.10	ACE2	chrX	15673898	T	A	b38	rs5934262	4.7e-10	0.45	Brain - Cerebellum
ENSG00000130234.10	ACE2	chrX	15674316	A	C	b38	rs4830977	4.7e-10	0.45	Brain - Cerebellum
ENSG00000130234.10	ACE2	chrX	15674699	T	C	b38	rs4830978	4.7e-10	0.45	Brain - Cerebellum
ENSG00000130234.10	ACE2	chrX	15675244	A	G	b38	rs4830979	4.7e-10	0.45	Brain - Cerebellum
ENSG00000130234.10	ACE2	chrX	15675338	T	A	b38	rs4830980	4.7e-10	0.45	Brain - Cerebellum
ENSG00000130234.10	ACE2	chrX	15676066	A	C	b38	rs997294	4.7e-10	0.45	Brain - Cerebellum
ENSG00000130234.10	ACE2	chrX	15676490	T	C	b38	rs7065227	4.7e-10	0.45	Brain - Cerebellum
ENSG00000130234.10	ACE2	chrX	15676654	A	G	b38	rs10521649	4.7e-10	0.45	Brain - Cerebellum
ENSG00000130234.10	ACE2	chrX	15682840	G	A	b38	rs4830982	4.7e-10	0.45	Brain - Cerebellum
ENSG00000130234.10	ACE2	chrX	15685402	A	G	b38	rs6632710	4.7e-10	0.45	Brain - Cerebellum
ENSG00000130234.10	ACE2	chrX	15690021	G	A	b38	rs6527627	4.7e-10	0.45	Brain - Cerebellum
ENSG00000130234.10	ACE2	chrX	15694830	G	A	b38	rs4830987	4.7e-10	0.45	Brain - Cerebellum
ENSG00000130234.10	ACE2	chrX	15698680	A	T	b38	rs5936016	4.7e-10	0.45	Brain - Cerebellum
ENSG00000130234.10	ACE2	chrX	15698764	T	C	b38	rs5936017	4.7e-10	0.45	Brain - Cerebellum
ENSG00000130234.10	ACE2	chrX	15702202	A	G	b38	rs1877923	4.7e-10	0.45	Brain - Cerebellum
ENSG00000130234.10	ACE2	chrX	15702557	CTG	C	b38	rs35373086	4.7e-10	0.45	Brain - Cerebellum
ENSG00000130234.10	ACE2	chrX	15702600	C	T	b38	rs5934267	4.7e-10	0.45	Brain - Cerebellum
ENSG00000130234.10	ACE2	chrX	15707807	G	T	b38	rs2873135	4.7e-10	0.45	Brain - Cerebellum
ENSG00000130234.10	ACE2	chrX	15708300	C	T	b38	rs5936021	4.7e-10	0.45	Brain - Cerebellum
ENSG00000130234.10	ACE2	chrX	15709365	G	C	b38	rs4830546	4.7e-10	0.45	Brain - Cerebellum
ENSG00000130234.10	ACE2	chrX	15713217	T	C	b38	rs6527633	4.7e-10	0.45	Brain - Cerebellum
ENSG00000130234.10	ACE2	chrX	15713432	G	A	b38	rs1811781	4.7e-10	0.45	Brain - Cerebellum
ENSG00000130234.10	ACE2	chrX	15713496	G	T	b38	rs2012660	4.7e-10	0.45	Brain - Cerebellum
ENSG00000130234.10	ACE2	chrX	15715881	C	T	b38	rs5936026	4.7e-10	0.45	Brain - Cerebellum
ENSG00000130234.10	ACE2	chrX	15718136	C	G	b38	rs1849864	4.7e-10	0.45	Brain - Cerebellum
ENSG00000130234.10	ACE2	chrX	15660010	C	T	b38	rs5934260	4.9e-10	0.5	Brain - Putamen (basal ganglia)
ENSG00000130234.10	ACE2	chrX	15662833	C	A	b38	rs5936006	4.9e-10	0.5	Brain - Putamen (basal ganglia)
ENSG00000130234.10	ACE2	chrX	15663053	A	T	b38	rs6632702	4.9e-10	0.5	Brain - Putamen (basal ganglia)
ENSG00000130234.10	ACE2	chrX	15663897	G	T	b38	rs5978732	4.9e-10	0.5	Brain - Putamen (basal ganglia)
ENSG00000130234.10	ACE2	chrX	15643040	A	G	b38	rs5934254	5.3e-10	0.45	Brain - Caudate (basal ganglia)
ENSG00000130234.10	ACE2	chrX	15646921	C	G	b38	rs5934256	5.3e-10	0.45	Brain - Caudate (basal ganglia)
ENSG00000130234.10	ACE2	chrX	15655180	C	T	b38	rs5934259	5.3e-10	0.45	Brain - Caudate (basal ganglia)
ENSG00000130234.10	ACE2	chrX	15625156	T	C	b38	rs6629110	6e-10	0.22	Artery - Tibial
ENSG00000130234.10	ACE2	chrX	15607860	T	G	b38	rs5934250	6.3e-10	0.45	Brain - Caudate (basal ganglia)
ENSG00000130234.10	ACE2	chrX	15624602	ATGGATTGTGTT	A	b38	rs66462812	6.3e-10	0.45	Brain - Caudate (basal ganglia)
ENSG00000130234.10	ACE2	chrX	15660010	C	T	b38	rs5934260	8.3e-10	0.44	Brain - Cerebellum
ENSG00000130234.10	ACE2	chrX	15662833	C	A	b38	rs5936006	8.3e-10	0.44	Brain - Cerebellum
ENSG00000130234.10	ACE2	chrX	15663053	A	T	b38	rs6632702	8.3e-10	0.44	Brain - Cerebellum
ENSG00000130234.10	ACE2	chrX	15663897	G	T	b38	rs5978732	8.3e-10	0.44	Brain - Cerebellum
ENSG00000130234.10	ACE2	chrX	15625554	GA	G	b38	rs56369428	9e-10	0.42	Brain - Caudate (basal ganglia)
ENSG00000130234.10	ACE2	chrX	15668176	C	A	b38	rs6632704	1.1e-09	0.5	Brain - Putamen (basal ganglia)
ENSG00000130234.10	ACE2	chrX	15674766	C	G	b38	rs5936010	1.1e-09	0.5	Brain - Putamen (basal ganglia)
ENSG00000130234.10	ACE2	chrX	15675734	C	T	b38	rs5934263	1.1e-09	0.5	Brain - Putamen (basal ganglia)
ENSG00000130234.10	ACE2	chrX	15676365	C	T	b38	rs997300	1.1e-09	0.5	Brain - Putamen (basal ganglia)
ENSG00000130234.10	ACE2	chrX	15682709	T	C	b38	rs4830981	1.1e-09	0.5	Brain - Putamen (basal ganglia)
ENSG00000130234.10	ACE2	chrX	15683622	A	T	b38	rs4830985	1.1e-09	0.5	Brain - Putamen (basal ganglia)
ENSG00000130234.10	ACE2	chrX	15689209	GGCTT	G	b38	rs34093185	1.1e-09	0.5	Brain - Putamen (basal ganglia)
ENSG00000130234.10	ACE2	chrX	15691078	A	T	b38	rs6632713	1.1e-09	0.5	Brain - Putamen (basal ganglia)
ENSG00000130234.10	ACE2	chrX	15691331	T	C	b38	rs6629119	1.1e-09	0.5	Brain - Putamen (basal ganglia)
ENSG00000130234.10	ACE2	chrX	15693789	T	G	b38	rs7062378	1.1e-09	0.5	Brain - Putamen (basal ganglia)
ENSG00000130234.10	ACE2	chrX	15698322	A	G	b38	rs5936015	1.1e-09	0.5	Brain - Putamen (basal ganglia)
ENSG00000130234.10	ACE2	chrX	15705881	A	G	b38	rs5934268	1.1e-09	0.5	Brain - Putamen (basal ganglia)
ENSG00000130234.10	ACE2	chrX	15706752	A	G	b38	rs5936020	1.1e-09	0.5	Brain - Putamen (basal ganglia)
ENSG00000130234.10	ACE2	chrX	15709854	G	A	b38	rs5936023	1.1e-09	0.5	Brain - Putamen (basal ganglia)
ENSG00000130234.10	ACE2	chrX	15712496	G	A	b38	rs1515008	1.1e-09	0.5	Brain - Putamen (basal ganglia)
ENSG00000130234.10	ACE2	chrX	15713643	C	G	b38	rs2012671	1.1e-09	0.5	Brain - Putamen (basal ganglia)
ENSG00000130234.10	ACE2	chrX	15715871	A	G	b38	rs5934269	1.1e-09	0.5	Brain - Putamen (basal ganglia)
ENSG00000130234.10	ACE2	chrX	15625554	GA	G	b38	rs56369428	1.2e-09	0.22	Artery - Tibial
ENSG00000130234.10	ACE2	chrX	15661440	G	C	b38	rs5934261	1.2e-09	0.22	Artery - Tibial
ENSG00000130234.10	ACE2	chrX	15675427	G	GGGCGCGGTCCTTACGTGT	b38	rs200781818	1.3e-09	0.44	Brain - Cerebellum
ENSG00000130234.10	ACE2	chrX	15625554	GA	G	b38	rs56369428	1.5e-09	0.44	Brain - Cerebellum
ENSG00000130234.10	ACE2	chrX	15629578	A	G	b38	rs2106806	1.6e-09	0.45	Brain - Caudate (basal ganglia)
ENSG00000130234.10	ACE2	chrX	15599940	T	C	b38	rs1978124	1.9e-09	0.44	Brain - Caudate (basal ganglia)
ENSG00000130234.10	ACE2	chrX	15723284	A	C	b38	rs4830547	2e-09	0.44	Brain - Caudate (basal ganglia)
ENSG00000130234.10	ACE2	chrX	15688707	C	A	b38	rs4060	2.2e-09	0.43	Brain - Cerebellum
ENSG00000130234.10	ACE2	chrX	15695950	G	A	b38	rs5936013	2.2e-09	0.43	Brain - Cerebellum
ENSG00000130234.10	ACE2	chrX	15625156	T	C	b38	rs6629110	2.2e-09	0.41	Brain - Caudate (basal ganglia)
ENSG00000130234.10	ACE2	chrX	15663575	TAACA	T	b38	rs138992236	2.4e-09	0.22	Artery - Tibial
ENSG00000130234.10	ACE2	chrX	15668176	C	A	b38	rs6632704	2.4e-09	0.43	Brain - Cerebellum
ENSG00000130234.10	ACE2	chrX	15674766	C	G	b38	rs5936010	2.4e-09	0.43	Brain - Cerebellum
ENSG00000130234.10	ACE2	chrX	15675734	C	T	b38	rs5934263	2.4e-09	0.43	Brain - Cerebellum
ENSG00000130234.10	ACE2	chrX	15676365	C	T	b38	rs997300	2.4e-09	0.43	Brain - Cerebellum
ENSG00000130234.10	ACE2	chrX	15682709	T	C	b38	rs4830981	2.4e-09	0.43	Brain - Cerebellum
ENSG00000130234.10	ACE2	chrX	15683622	A	T	b38	rs4830985	2.4e-09	0.43	Brain - Cerebellum
ENSG00000130234.10	ACE2	chrX	15689209	GGCTT	G	b38	rs34093185	2.4e-09	0.43	Brain - Cerebellum
ENSG00000130234.10	ACE2	chrX	15691078	A	T	b38	rs6632713	2.4e-09	0.43	Brain - Cerebellum
ENSG00000130234.10	ACE2	chrX	15691331	T	C	b38	rs6629119	2.4e-09	0.43	Brain - Cerebellum
ENSG00000130234.10	ACE2	chrX	15693789	T	G	b38	rs7062378	2.4e-09	0.43	Brain - Cerebellum
ENSG00000130234.10	ACE2	chrX	15698322	A	G	b38	rs5936015	2.4e-09	0.43	Brain - Cerebellum
ENSG00000130234.10	ACE2	chrX	15705881	A	G	b38	rs5934268	2.4e-09	0.43	Brain - Cerebellum
ENSG00000130234.10	ACE2	chrX	15706752	A	G	b38	rs5936020	2.4e-09	0.43	Brain - Cerebellum
ENSG00000130234.10	ACE2	chrX	15709854	G	A	b38	rs5936023	2.4e-09	0.43	Brain - Cerebellum
ENSG00000130234.10	ACE2	chrX	15712496	G	A	b38	rs1515008	2.4e-09	0.43	Brain - Cerebellum
ENSG00000130234.10	ACE2	chrX	15713643	C	G	b38	rs2012671	2.4e-09	0.43	Brain - Cerebellum
ENSG00000130234.10	ACE2	chrX	15715871	A	G	b38	rs5934269	2.4e-09	0.43	Brain - Cerebellum
ENSG00000130234.10	ACE2	chrX	15679923	C	T	b38	rs5936011	2.5e-09	0.46	Brain - Cerebellum
ENSG00000130234.10	ACE2	chrX	15682937	A	C	b38	rs4830983	2.5e-09	0.46	Brain - Cerebellum
ENSG00000130234.10	ACE2	chrX	15700755	A	G	b38	rs5936018	2.5e-09	0.46	Brain - Cerebellum
ENSG00000130234.10	ACE2	chrX	15705022	T	C	b38	rs5936019	2.5e-09	0.46	Brain - Cerebellum
ENSG00000130234.10	ACE2	chrX	15581769	T	TTTAA	b38	rs138373349	2.5e-09	0.21	Nerve - Tibial
ENSG00000130234.10	ACE2	chrX	15674766	C	G	b38	rs5936010	2.6e-09	0.22	Artery - Tibial
ENSG00000130234.10	ACE2	chrX	15679923	C	T	b38	rs5936011	3e-09	0.51	Brain - Putamen (basal ganglia)
ENSG00000130234.10	ACE2	chrX	15682937	A	C	b38	rs4830983	3e-09	0.51	Brain - Putamen (basal ganglia)
ENSG00000130234.10	ACE2	chrX	15700755	A	G	b38	rs5936018	3e-09	0.51	Brain - Putamen (basal ganglia)
ENSG00000130234.10	ACE2	chrX	15705022	T	C	b38	rs5936019	3e-09	0.51	Brain - Putamen (basal ganglia)
ENSG00000130234.10	ACE2	chrX	15612712	A	C	b38	rs6632680	3.2e-09	0.22	Artery - Tibial
ENSG00000130234.10	ACE2	chrX	15594320	GA	G	b38	rs4646131	3.3e-09	0.2	Nerve - Tibial
ENSG00000130234.10	ACE2	chrX	15625156	T	C	b38	rs6629110	3.3e-09	0.43	Brain - Cerebellum
ENSG00000130234.10	ACE2	chrX	15721189	C	T	b38	rs5936029	3.6e-09	0.43	Brain - Caudate (basal ganglia)
ENSG00000130234.10	ACE2	chrX	15578920	A	T	b38	rs4646156	4e-09	0.2	Nerve - Tibial
ENSG00000130234.10	ACE2	chrX	15596022	G	A	b38	rs2023802	4e-09	0.2	Nerve - Tibial
ENSG00000130234.10	ACE2	chrX	15598673	T	C	b38	rs4646124	4e-09	0.2	Nerve - Tibial
ENSG00000130234.10	ACE2	chrX	15626097	G	A	b38	rs2158082	4.5e-09	0.45	Brain - Cerebellum
ENSG00000130234.10	ACE2	chrX	15643040	A	G	b38	rs5934254	4.5e-09	0.45	Brain - Cerebellum
ENSG00000130234.10	ACE2	chrX	15646921	C	G	b38	rs5934256	4.5e-09	0.45	Brain - Cerebellum
ENSG00000130234.10	ACE2	chrX	15655180	C	T	b38	rs5934259	4.5e-09	0.45	Brain - Cerebellum
ENSG00000130234.10	ACE2	chrX	15655444	T	C	b38	rs4830971	4.5e-09	0.45	Brain - Cerebellum
ENSG00000130234.10	ACE2	chrX	15655746	G	A	b38	rs4830972	4.5e-09	0.45	Brain - Cerebellum
ENSG00000130234.10	ACE2	chrX	15578020	C	CATAAG	b38	rs113691336	4.5e-09	0.21	Nerve - Tibial
ENSG00000130234.10	ACE2	chrX	15596540	G	GT	b38	rs768560726	4.5e-09	0.21	Nerve - Tibial
ENSG00000130234.10	ACE2	chrX	15612712	A	C	b38	rs6632680	4.5e-09	0.48	Brain - Putamen (basal ganglia)
ENSG00000130234.10	ACE2	chrX	15731193	A	AT	b38	rs35593267	4.7e-09	-0.21	Nerve - Tibial
ENSG00000130234.10	ACE2	chrX	15668176	C	A	b38	rs6632704	4.9e-09	0.21	Artery - Tibial
ENSG00000130234.10	ACE2	chrX	15661440	G	C	b38	rs5934261	5e-09	0.42	Brain - Cerebellum
ENSG00000130234.10	ACE2	chrX	15663575	TAACA	T	b38	rs138992236	5e-09	0.42	Brain - Cerebellum
ENSG00000130234.10	ACE2	chrX	15676365	C	T	b38	rs997300	5.4e-09	0.21	Artery - Tibial
ENSG00000130234.10	ACE2	chrX	15682709	T	C	b38	rs4830981	5.4e-09	0.21	Artery - Tibial
ENSG00000130234.10	ACE2	chrX	15683622	A	T	b38	rs4830985	5.4e-09	0.21	Artery - Tibial
ENSG00000130234.10	ACE2	chrX	15689209	GGCTT	G	b38	rs34093185	5.4e-09	0.21	Artery - Tibial
ENSG00000130234.10	ACE2	chrX	15691078	A	T	b38	rs6632713	5.4e-09	0.21	Artery - Tibial
ENSG00000130234.10	ACE2	chrX	15691331	T	C	b38	rs6629119	5.4e-09	0.21	Artery - Tibial
ENSG00000130234.10	ACE2	chrX	15693789	T	G	b38	rs7062378	5.4e-09	0.21	Artery - Tibial
ENSG00000130234.10	ACE2	chrX	15698322	A	G	b38	rs5936015	5.4e-09	0.21	Artery - Tibial
ENSG00000130234.10	ACE2	chrX	15705881	A	G	b38	rs5934268	5.4e-09	0.21	Artery - Tibial
ENSG00000130234.10	ACE2	chrX	15706752	A	G	b38	rs5936020	5.4e-09	0.21	Artery - Tibial
ENSG00000130234.10	ACE2	chrX	15709854	G	A	b38	rs5936023	5.4e-09	0.21	Artery - Tibial
ENSG00000130234.10	ACE2	chrX	15712496	G	A	b38	rs1515008	5.4e-09	0.21	Artery - Tibial
ENSG00000130234.10	ACE2	chrX	15713643	C	G	b38	rs2012671	5.4e-09	0.21	Artery - Tibial
ENSG00000130234.10	ACE2	chrX	15715871	A	G	b38	rs5934269	5.4e-09	0.21	Artery - Tibial
ENSG00000130234.10	ACE2	chrX	15731193	A	AT	b38	rs35593267	5.5e-09	-0.46	Brain - Cortex
ENSG00000130234.10	ACE2	chrX	15612712	A	C	b38	rs6632680	6.3e-09	0.42	Brain - Cerebellum
ENSG00000130234.10	ACE2	chrX	15625554	GA	G	b38	rs56369428	6.7e-09	0.49	Brain - Putamen (basal ganglia)
ENSG00000130234.10	ACE2	chrX	15654035	A	C	b38	rs5934257	6.8e-09	0.22	Artery - Tibial
ENSG00000130234.10	ACE2	chrX	15752851	A	G	b38	rs62578954	7e-09	-0.2	Nerve - Tibial
ENSG00000130234.10	ACE2	chrX	15682937	A	C	b38	rs4830983	7.1e-09	0.48	Brain - Anterior cingulate cortex (BA24)
ENSG00000130234.10	ACE2	chrX	15597330	A	G	b38	rs4646127	7.5e-09	0.2	Nerve - Tibial
ENSG00000130234.10	ACE2	chrX	15597980	C	CA	b38	rs34481900	7.5e-09	0.2	Nerve - Tibial
ENSG00000130234.10	ACE2	chrX	15762129	G	A	b38	rs5980179	8.1e-09	-0.2	Nerve - Tibial
ENSG00000130234.10	ACE2	chrX	15590376	T	G	b38	rs2048683	8.5e-09	0.2	Nerve - Tibial
ENSG00000130234.10	ACE2	chrX	15582568	C	T	b38	rs2316904	8.6e-09	0.2	Nerve - Tibial
ENSG00000130234.10	ACE2	chrX	15582621	T	A	b38	rs4646147	8.6e-09	0.2	Nerve - Tibial
ENSG00000130234.10	ACE2	chrX	15582756	C	CA	b38	rs773423496	8.6e-09	0.2	Nerve - Tibial
ENSG00000130234.10	ACE2	chrX	15583151	G	T	b38	rs2316903	8.6e-09	0.2	Nerve - Tibial
ENSG00000130234.10	ACE2	chrX	15679923	C	T	b38	rs5936011	8.6e-09	0.48	Brain - Anterior cingulate cortex (BA24)
ENSG00000130234.10	ACE2	chrX	15700755	A	G	b38	rs5936018	8.6e-09	0.48	Brain - Anterior cingulate cortex (BA24)
ENSG00000130234.10	ACE2	chrX	15705022	T	C	b38	rs5936019	8.6e-09	0.48	Brain - Anterior cingulate cortex (BA24)
ENSG00000130234.10	ACE2	chrX	15661440	G	C	b38	rs5934261	9.7e-09	0.47	Brain - Putamen (basal ganglia)
ENSG00000130234.10	ACE2	chrX	15663575	TAACA	T	b38	rs138992236	9.7e-09	0.47	Brain - Putamen (basal ganglia)
ENSG00000130234.10	ACE2	chrX	15589527	T	C	b38	rs971249	1e-08	0.2	Nerve - Tibial
ENSG00000130234.10	ACE2	chrX	15668176	C	A	b38	rs6632704	1.2e-08	0.45	Brain - Anterior cingulate cortex (BA24)
ENSG00000130234.10	ACE2	chrX	15674766	C	G	b38	rs5936010	1.2e-08	0.45	Brain - Anterior cingulate cortex (BA24)
ENSG00000130234.10	ACE2	chrX	15675734	C	T	b38	rs5934263	1.2e-08	0.45	Brain - Anterior cingulate cortex (BA24)
ENSG00000130234.10	ACE2	chrX	15676365	C	T	b38	rs997300	1.2e-08	0.45	Brain - Anterior cingulate cortex (BA24)
ENSG00000130234.10	ACE2	chrX	15682709	T	C	b38	rs4830981	1.2e-08	0.45	Brain - Anterior cingulate cortex (BA24)
ENSG00000130234.10	ACE2	chrX	15683622	A	T	b38	rs4830985	1.2e-08	0.45	Brain - Anterior cingulate cortex (BA24)
ENSG00000130234.10	ACE2	chrX	15689209	GGCTT	G	b38	rs34093185	1.2e-08	0.45	Brain - Anterior cingulate cortex (BA24)
ENSG00000130234.10	ACE2	chrX	15691078	A	T	b38	rs6632713	1.2e-08	0.45	Brain - Anterior cingulate cortex (BA24)
ENSG00000130234.10	ACE2	chrX	15691331	T	C	b38	rs6629119	1.2e-08	0.45	Brain - Anterior cingulate cortex (BA24)
ENSG00000130234.10	ACE2	chrX	15693789	T	G	b38	rs7062378	1.2e-08	0.45	Brain - Anterior cingulate cortex (BA24)
ENSG00000130234.10	ACE2	chrX	15698322	A	G	b38	rs5936015	1.2e-08	0.45	Brain - Anterior cingulate cortex (BA24)
ENSG00000130234.10	ACE2	chrX	15705881	A	G	b38	rs5934268	1.2e-08	0.45	Brain - Anterior cingulate cortex (BA24)
ENSG00000130234.10	ACE2	chrX	15706752	A	G	b38	rs5936020	1.2e-08	0.45	Brain - Anterior cingulate cortex (BA24)
ENSG00000130234.10	ACE2	chrX	15709854	G	A	b38	rs5936023	1.2e-08	0.45	Brain - Anterior cingulate cortex (BA24)
ENSG00000130234.10	ACE2	chrX	15712496	G	A	b38	rs1515008	1.2e-08	0.45	Brain - Anterior cingulate cortex (BA24)
ENSG00000130234.10	ACE2	chrX	15713643	C	G	b38	rs2012671	1.2e-08	0.45	Brain - Anterior cingulate cortex (BA24)
ENSG00000130234.10	ACE2	chrX	15715871	A	G	b38	rs5934269	1.2e-08	0.45	Brain - Anterior cingulate cortex (BA24)
ENSG00000130234.10	ACE2	chrX	15644812	T	C	b38	rs5936000	1.2e-08	0.22	Nerve - Tibial
ENSG00000130234.10	ACE2	chrX	15745845	AT	A	b38	rs66671051	1.2e-08	-0.2	Nerve - Tibial
ENSG00000130234.10	ACE2	chrX	15746324	C	T	b38	rs56127019	1.2e-08	-0.2	Nerve - Tibial
ENSG00000130234.10	ACE2	chrX	15688707	C	A	b38	rs4060	1.2e-08	0.45	Brain - Anterior cingulate cortex (BA24)
ENSG00000130234.10	ACE2	chrX	15695950	G	A	b38	rs5936013	1.2e-08	0.45	Brain - Anterior cingulate cortex (BA24)
ENSG00000130234.10	ACE2	chrX	15590829	C	T	b38	rs757066	1.2e-08	0.2	Nerve - Tibial
ENSG00000130234.10	ACE2	chrX	15658294	G	A	b38	rs4830974	1.3e-08	0.46	Brain - Anterior cingulate cortex (BA24)
ENSG00000130234.10	ACE2	chrX	15660059	G	A	b38	rs4830975	1.3e-08	0.46	Brain - Anterior cingulate cortex (BA24)
ENSG00000130234.10	ACE2	chrX	15666611	A	G	b38	rs5936007	1.3e-08	0.46	Brain - Anterior cingulate cortex (BA24)
ENSG00000130234.10	ACE2	chrX	15667361	C	A	b38	rs4830976	1.3e-08	0.46	Brain - Anterior cingulate cortex (BA24)
ENSG00000130234.10	ACE2	chrX	15667422	C	G	b38	rs4830544	1.3e-08	0.46	Brain - Anterior cingulate cortex (BA24)
ENSG00000130234.10	ACE2	chrX	15667464	C	T	b38	rs4830545	1.3e-08	0.46	Brain - Anterior cingulate cortex (BA24)
ENSG00000130234.10	ACE2	chrX	15671586	G	C	b38	rs1533363	1.3e-08	0.46	Brain - Anterior cingulate cortex (BA24)
ENSG00000130234.10	ACE2	chrX	15673559	C	A	b38	rs1554087	1.3e-08	0.46	Brain - Anterior cingulate cortex (BA24)
ENSG00000130234.10	ACE2	chrX	15673898	T	A	b38	rs5934262	1.3e-08	0.46	Brain - Anterior cingulate cortex (BA24)
ENSG00000130234.10	ACE2	chrX	15674316	A	C	b38	rs4830977	1.3e-08	0.46	Brain - Anterior cingulate cortex (BA24)
ENSG00000130234.10	ACE2	chrX	15674699	T	C	b38	rs4830978	1.3e-08	0.46	Brain - Anterior cingulate cortex (BA24)
ENSG00000130234.10	ACE2	chrX	15675244	A	G	b38	rs4830979	1.3e-08	0.46	Brain - Anterior cingulate cortex (BA24)
ENSG00000130234.10	ACE2	chrX	15675338	T	A	b38	rs4830980	1.3e-08	0.46	Brain - Anterior cingulate cortex (BA24)
ENSG00000130234.10	ACE2	chrX	15676066	A	C	b38	rs997294	1.3e-08	0.46	Brain - Anterior cingulate cortex (BA24)
ENSG00000130234.10	ACE2	chrX	15676490	T	C	b38	rs7065227	1.3e-08	0.46	Brain - Anterior cingulate cortex (BA24)
ENSG00000130234.10	ACE2	chrX	15676654	A	G	b38	rs10521649	1.3e-08	0.46	Brain - Anterior cingulate cortex (BA24)
ENSG00000130234.10	ACE2	chrX	15682840	G	A	b38	rs4830982	1.3e-08	0.46	Brain - Anterior cingulate cortex (BA24)
ENSG00000130234.10	ACE2	chrX	15685402	A	G	b38	rs6632710	1.3e-08	0.46	Brain - Anterior cingulate cortex (BA24)
ENSG00000130234.10	ACE2	chrX	15690021	G	A	b38	rs6527627	1.3e-08	0.46	Brain - Anterior cingulate cortex (BA24)
ENSG00000130234.10	ACE2	chrX	15694830	G	A	b38	rs4830987	1.3e-08	0.46	Brain - Anterior cingulate cortex (BA24)
ENSG00000130234.10	ACE2	chrX	15698680	A	T	b38	rs5936016	1.3e-08	0.46	Brain - Anterior cingulate cortex (BA24)
ENSG00000130234.10	ACE2	chrX	15698764	T	C	b38	rs5936017	1.3e-08	0.46	Brain - Anterior cingulate cortex (BA24)
ENSG00000130234.10	ACE2	chrX	15702202	A	G	b38	rs1877923	1.3e-08	0.46	Brain - Anterior cingulate cortex (BA24)
ENSG00000130234.10	ACE2	chrX	15702557	CTG	C	b38	rs35373086	1.3e-08	0.46	Brain - Anterior cingulate cortex (BA24)
ENSG00000130234.10	ACE2	chrX	15702600	C	T	b38	rs5934267	1.3e-08	0.46	Brain - Anterior cingulate cortex (BA24)
ENSG00000130234.10	ACE2	chrX	15707807	G	T	b38	rs2873135	1.3e-08	0.46	Brain - Anterior cingulate cortex (BA24)
ENSG00000130234.10	ACE2	chrX	15708300	C	T	b38	rs5936021	1.3e-08	0.46	Brain - Anterior cingulate cortex (BA24)
ENSG00000130234.10	ACE2	chrX	15709365	G	C	b38	rs4830546	1.3e-08	0.46	Brain - Anterior cingulate cortex (BA24)
ENSG00000130234.10	ACE2	chrX	15713217	T	C	b38	rs6527633	1.3e-08	0.46	Brain - Anterior cingulate cortex (BA24)
ENSG00000130234.10	ACE2	chrX	15713432	G	A	b38	rs1811781	1.3e-08	0.46	Brain - Anterior cingulate cortex (BA24)
ENSG00000130234.10	ACE2	chrX	15713496	G	T	b38	rs2012660	1.3e-08	0.46	Brain - Anterior cingulate cortex (BA24)
ENSG00000130234.10	ACE2	chrX	15715881	C	T	b38	rs5936026	1.3e-08	0.46	Brain - Anterior cingulate cortex (BA24)
ENSG00000130234.10	ACE2	chrX	15718136	C	G	b38	rs1849864	1.3e-08	0.46	Brain - Anterior cingulate cortex (BA24)
ENSG00000130234.10	ACE2	chrX	15599940	T	C	b38	rs1978124	1.3e-08	0.44	Brain - Cerebellum
ENSG00000130234.10	ACE2	chrX	15586742	G	A	b38	rs1514279	1.3e-08	0.2	Nerve - Tibial
ENSG00000130234.10	ACE2	chrX	15737797	GTGTT	G	b38	rs35251171	1.3e-08	-0.2	Nerve - Tibial
ENSG00000130234.10	ACE2	chrX	15755357	A	G	b38	rs62578955	1.4e-08	-0.2	Nerve - Tibial
ENSG00000130234.10	ACE2	chrX	15776404	G	A	b38	rs5980182	1.4e-08	-0.2	Nerve - Tibial
ENSG00000130234.10	ACE2	chrX	15599613	G	A	b38	rs4646120	1.6e-08	0.21	Artery - Tibial
ENSG00000130234.10	ACE2	chrX	15579712	C	T	b38	rs4646153	1.6e-08	0.2	Nerve - Tibial
ENSG00000130234.10	ACE2	chrX	15579901	A	G	b38	rs4646152	1.6e-08	0.2	Nerve - Tibial
ENSG00000130234.10	ACE2	chrX	15582092	A	C	b38	rs2048684	1.6e-08	0.2	Nerve - Tibial
ENSG00000130234.10	ACE2	chrX	15761179	C	CT	b38	rs11398820	1.6e-08	-0.2	Nerve - Tibial
ENSG00000130234.10	ACE2	chrX	15772210	A	G	b38	rs5980180	1.6e-08	-0.2	Nerve - Tibial
ENSG00000130234.10	ACE2	chrX	15675734	C	T	b38	rs5934263	1.7e-08	0.2	Artery - Tibial
ENSG00000130234.10	ACE2	chrX	15767810	G	A	b38	rs11796442	1.7e-08	-0.2	Nerve - Tibial
ENSG00000130234.10	ACE2	chrX	15626097	G	A	b38	rs2158082	1.9e-08	0.48	Brain - Putamen (basal ganglia)
ENSG00000130234.10	ACE2	chrX	15643040	A	G	b38	rs5934254	1.9e-08	0.48	Brain - Putamen (basal ganglia)
ENSG00000130234.10	ACE2	chrX	15646921	C	G	b38	rs5934256	1.9e-08	0.48	Brain - Putamen (basal ganglia)
ENSG00000130234.10	ACE2	chrX	15655180	C	T	b38	rs5934259	1.9e-08	0.48	Brain - Putamen (basal ganglia)
ENSG00000130234.10	ACE2	chrX	15655444	T	C	b38	rs4830971	1.9e-08	0.48	Brain - Putamen (basal ganglia)
ENSG00000130234.10	ACE2	chrX	15655746	G	A	b38	rs4830972	1.9e-08	0.48	Brain - Putamen (basal ganglia)
ENSG00000130234.10	ACE2	chrX	15590263	C	T	b38	rs2158083	1.9e-08	0.19	Nerve - Tibial
ENSG00000130234.10	ACE2	chrX	15688707	C	A	b38	rs4060	1.9e-08	0.21	Artery - Tibial
ENSG00000130234.10	ACE2	chrX	15695950	G	A	b38	rs5936013	1.9e-08	0.21	Artery - Tibial
ENSG00000130234.10	ACE2	chrX	15626097	G	A	b38	rs2158082	1.9e-08	0.22	Artery - Tibial
ENSG00000130234.10	ACE2	chrX	15655444	T	C	b38	rs4830971	1.9e-08	0.22	Artery - Tibial
ENSG00000130234.10	ACE2	chrX	15655746	G	A	b38	rs4830972	1.9e-08	0.22	Artery - Tibial
ENSG00000130234.10	ACE2	chrX	15635613	C	T	b38	rs5934253	2.1e-08	0.22	Nerve - Tibial
ENSG00000130234.10	ACE2	chrX	15639988	T	C	b38	rs990432	2.1e-08	0.22	Nerve - Tibial
ENSG00000130234.10	ACE2	chrX	15645642	C	G	b38	rs5936001	2.1e-08	0.22	Nerve - Tibial
ENSG00000130234.10	ACE2	chrX	15645735	A	C	b38	rs5936002	2.1e-08	0.22	Nerve - Tibial
ENSG00000130234.10	ACE2	chrX	15650009	C	G	b38	rs6629114	2.1e-08	0.22	Nerve - Tibial
ENSG00000130234.10	ACE2	chrX	15654681	T	C	b38	rs6632695	2.1e-08	0.22	Nerve - Tibial
ENSG00000130234.10	ACE2	chrX	15607860	T	G	b38	rs5934250	2.1e-08	0.43	Brain - Cerebellum
ENSG00000130234.10	ACE2	chrX	15624602	ATGGATTGTGTT	A	b38	rs66462812	2.1e-08	0.43	Brain - Cerebellum
ENSG00000130234.10	ACE2	chrX	15629578	A	G	b38	rs2106806	2.1e-08	0.43	Brain - Cerebellum
ENSG00000130234.10	ACE2	chrX	15607860	T	G	b38	rs5934250	2.2e-08	0.48	Brain - Putamen (basal ganglia)
ENSG00000130234.10	ACE2	chrX	15624602	ATGGATTGTGTT	A	b38	rs66462812	2.2e-08	0.48	Brain - Putamen (basal ganglia)
ENSG00000130234.10	ACE2	chrX	15629578	A	G	b38	rs2106806	2.2e-08	0.48	Brain - Putamen (basal ganglia)
ENSG00000130234.10	ACE2	chrX	15693086	C	T	b38	rs1996225	2.5e-08	0.45	Brain - Anterior cingulate cortex (BA24)
ENSG00000130234.10	ACE2	chrX	15668176	C	A	b38	rs6632704	2.5e-08	0.39	Brain - Hypothalamus
ENSG00000130234.10	ACE2	chrX	15674766	C	G	b38	rs5936010	2.5e-08	0.39	Brain - Hypothalamus
ENSG00000130234.10	ACE2	chrX	15675734	C	T	b38	rs5934263	2.5e-08	0.39	Brain - Hypothalamus
ENSG00000130234.10	ACE2	chrX	15676365	C	T	b38	rs997300	2.5e-08	0.39	Brain - Hypothalamus
ENSG00000130234.10	ACE2	chrX	15682709	T	C	b38	rs4830981	2.5e-08	0.39	Brain - Hypothalamus
ENSG00000130234.10	ACE2	chrX	15683622	A	T	b38	rs4830985	2.5e-08	0.39	Brain - Hypothalamus
ENSG00000130234.10	ACE2	chrX	15689209	GGCTT	G	b38	rs34093185	2.5e-08	0.39	Brain - Hypothalamus
ENSG00000130234.10	ACE2	chrX	15691078	A	T	b38	rs6632713	2.5e-08	0.39	Brain - Hypothalamus
ENSG00000130234.10	ACE2	chrX	15691331	T	C	b38	rs6629119	2.5e-08	0.39	Brain - Hypothalamus
ENSG00000130234.10	ACE2	chrX	15693789	T	G	b38	rs7062378	2.5e-08	0.39	Brain - Hypothalamus
ENSG00000130234.10	ACE2	chrX	15698322	A	G	b38	rs5936015	2.5e-08	0.39	Brain - Hypothalamus
ENSG00000130234.10	ACE2	chrX	15705881	A	G	b38	rs5934268	2.5e-08	0.39	Brain - Hypothalamus
ENSG00000130234.10	ACE2	chrX	15706752	A	G	b38	rs5936020	2.5e-08	0.39	Brain - Hypothalamus
ENSG00000130234.10	ACE2	chrX	15709854	G	A	b38	rs5936023	2.5e-08	0.39	Brain - Hypothalamus
ENSG00000130234.10	ACE2	chrX	15712496	G	A	b38	rs1515008	2.5e-08	0.39	Brain - Hypothalamus
ENSG00000130234.10	ACE2	chrX	15713643	C	G	b38	rs2012671	2.5e-08	0.39	Brain - Hypothalamus
ENSG00000130234.10	ACE2	chrX	15715871	A	G	b38	rs5934269	2.5e-08	0.39	Brain - Hypothalamus
ENSG00000130234.10	ACE2	chrX	15660010	C	T	b38	rs5934260	2.7e-08	0.45	Brain - Anterior cingulate cortex (BA24)
ENSG00000130234.10	ACE2	chrX	15662833	C	A	b38	rs5936006	2.7e-08	0.45	Brain - Anterior cingulate cortex (BA24)
ENSG00000130234.10	ACE2	chrX	15663053	A	T	b38	rs6632702	2.7e-08	0.45	Brain - Anterior cingulate cortex (BA24)
ENSG00000130234.10	ACE2	chrX	15663897	G	T	b38	rs5978732	2.7e-08	0.45	Brain - Anterior cingulate cortex (BA24)
ENSG00000130234.10	ACE2	chrX	15661440	G	C	b38	rs5934261	2.8e-08	0.44	Brain - Anterior cingulate cortex (BA24)
ENSG00000130234.10	ACE2	chrX	15663575	TAACA	T	b38	rs138992236	2.8e-08	0.44	Brain - Anterior cingulate cortex (BA24)
ENSG00000130234.10	ACE2	chrX	15755820	G	A	b38	rs5980177	2.8e-08	-0.19	Nerve - Tibial
ENSG00000130234.10	ACE2	chrX	15757407	G	A	b38	rs12393271	2.9e-08	-0.19	Nerve - Tibial
ENSG00000130234.10	ACE2	chrX	15643040	A	G	b38	rs5934254	2.9e-08	0.21	Artery - Tibial
ENSG00000130234.10	ACE2	chrX	15646921	C	G	b38	rs5934256	2.9e-08	0.21	Artery - Tibial
ENSG00000130234.10	ACE2	chrX	15655180	C	T	b38	rs5934259	2.9e-08	0.21	Artery - Tibial
ENSG00000130234.10	ACE2	chrX	15764327	C	T	b38	rs12393081	3e-08	-0.19	Nerve - Tibial
ENSG00000130234.10	ACE2	chrX	15661440	G	C	b38	rs5934261	3.1e-08	0.39	Brain - Hypothalamus
ENSG00000130234.10	ACE2	chrX	15663575	TAACA	T	b38	rs138992236	3.1e-08	0.39	Brain - Hypothalamus
ENSG00000130234.10	ACE2	chrX	15660010	C	T	b38	rs5934260	3.2e-08	0.2	Artery - Tibial
ENSG00000130234.10	ACE2	chrX	15662833	C	A	b38	rs5936006	3.2e-08	0.2	Artery - Tibial
ENSG00000130234.10	ACE2	chrX	15663053	A	T	b38	rs6632702	3.2e-08	0.2	Artery - Tibial
ENSG00000130234.10	ACE2	chrX	15663897	G	T	b38	rs5978732	3.2e-08	0.2	Artery - Tibial
ENSG00000130234.10	ACE2	chrX	15693086	C	T	b38	rs1996225	3.2e-08	0.39	Brain - Hypothalamus
ENSG00000130234.10	ACE2	chrX	15779631	G	T	b38	rs55966271	3.2e-08	-0.19	Nerve - Tibial
ENSG00000130234.10	ACE2	chrX	15675427	G	GGGCGCGGTCCTTACGTGT	b38	rs200781818	3.3e-08	0.21	Artery - Tibial
ENSG00000130234.10	ACE2	chrX	15654035	A	C	b38	rs5934257	3.4e-08	0.39	Brain - Caudate (basal ganglia)
ENSG00000130234.10	ACE2	chrX	15599940	T	C	b38	rs1978124	3.5e-08	0.47	Brain - Putamen (basal ganglia)
ENSG00000130234.10	ACE2	chrX	15666611	A	G	b38	rs5936007	3.5e-08	0.2	Artery - Tibial
ENSG00000130234.10	ACE2	chrX	15676654	A	G	b38	rs10521649	3.5e-08	0.2	Artery - Tibial
ENSG00000130234.10	ACE2	chrX	15599940	T	C	b38	rs1978124	3.6e-08	0.21	Artery - Tibial
ENSG00000130234.10	ACE2	chrX	15675427	G	GGGCGCGGTCCTTACGTGT	b38	rs200781818	3.9e-08	0.44	Brain - Anterior cingulate cortex (BA24)
ENSG00000130234.10	ACE2	chrX	15578020	C	CATAAG	b38	rs113691336	4.2e-08	0.39	Brain - Caudate (basal ganglia)
ENSG00000130234.10	ACE2	chrX	15596540	G	GT	b38	rs768560726	4.2e-08	0.39	Brain - Caudate (basal ganglia)
ENSG00000130234.10	ACE2	chrX	15737797	GTGTT	G	b38	rs35251171	4.9e-08	-0.43	Brain - Cortex
ENSG00000130234.10	ACE2	chrX	15629578	A	G	b38	rs2106806	5.4e-08	0.21	Artery - Tibial
ENSG00000130234.10	ACE2	chrX	15654035	A	C	b38	rs5934257	5.4e-08	0.41	Brain - Cerebellum
ENSG00000130234.10	ACE2	chrX	15625156	T	C	b38	rs6629110	5.6e-08	0.45	Brain - Putamen (basal ganglia)
ENSG00000130234.10	ACE2	chrX	15624602	ATGGATTGTGTT	A	b38	rs66462812	5.7e-08	0.21	Artery - Tibial
ENSG00000130234.10	ACE2	chrX	15660010	C	T	b38	rs5934260	6e-08	0.38	Brain - Hypothalamus
ENSG00000130234.10	ACE2	chrX	15662833	C	A	b38	rs5936006	6e-08	0.38	Brain - Hypothalamus
ENSG00000130234.10	ACE2	chrX	15663053	A	T	b38	rs6632702	6e-08	0.38	Brain - Hypothalamus
ENSG00000130234.10	ACE2	chrX	15663897	G	T	b38	rs5978732	6e-08	0.38	Brain - Hypothalamus
ENSG00000130234.10	ACE2	chrX	15658294	G	A	b38	rs4830974	6.2e-08	0.38	Brain - Hypothalamus
ENSG00000130234.10	ACE2	chrX	15660059	G	A	b38	rs4830975	6.2e-08	0.38	Brain - Hypothalamus
ENSG00000130234.10	ACE2	chrX	15666611	A	G	b38	rs5936007	6.2e-08	0.38	Brain - Hypothalamus
ENSG00000130234.10	ACE2	chrX	15667361	C	A	b38	rs4830976	6.2e-08	0.38	Brain - Hypothalamus
ENSG00000130234.10	ACE2	chrX	15667422	C	G	b38	rs4830544	6.2e-08	0.38	Brain - Hypothalamus
ENSG00000130234.10	ACE2	chrX	15667464	C	T	b38	rs4830545	6.2e-08	0.38	Brain - Hypothalamus
ENSG00000130234.10	ACE2	chrX	15671586	G	C	b38	rs1533363	6.2e-08	0.38	Brain - Hypothalamus
ENSG00000130234.10	ACE2	chrX	15673559	C	A	b38	rs1554087	6.2e-08	0.38	Brain - Hypothalamus
ENSG00000130234.10	ACE2	chrX	15673898	T	A	b38	rs5934262	6.2e-08	0.38	Brain - Hypothalamus
ENSG00000130234.10	ACE2	chrX	15674316	A	C	b38	rs4830977	6.2e-08	0.38	Brain - Hypothalamus
ENSG00000130234.10	ACE2	chrX	15674699	T	C	b38	rs4830978	6.2e-08	0.38	Brain - Hypothalamus
ENSG00000130234.10	ACE2	chrX	15675244	A	G	b38	rs4830979	6.2e-08	0.38	Brain - Hypothalamus
ENSG00000130234.10	ACE2	chrX	15675338	T	A	b38	rs4830980	6.2e-08	0.38	Brain - Hypothalamus
ENSG00000130234.10	ACE2	chrX	15676066	A	C	b38	rs997294	6.2e-08	0.38	Brain - Hypothalamus
ENSG00000130234.10	ACE2	chrX	15676490	T	C	b38	rs7065227	6.2e-08	0.38	Brain - Hypothalamus
ENSG00000130234.10	ACE2	chrX	15676654	A	G	b38	rs10521649	6.2e-08	0.38	Brain - Hypothalamus
ENSG00000130234.10	ACE2	chrX	15682840	G	A	b38	rs4830982	6.2e-08	0.38	Brain - Hypothalamus
ENSG00000130234.10	ACE2	chrX	15685402	A	G	b38	rs6632710	6.2e-08	0.38	Brain - Hypothalamus
ENSG00000130234.10	ACE2	chrX	15688707	C	A	b38	rs4060	6.2e-08	0.38	Brain - Hypothalamus
ENSG00000130234.10	ACE2	chrX	15690021	G	A	b38	rs6527627	6.2e-08	0.38	Brain - Hypothalamus
ENSG00000130234.10	ACE2	chrX	15694830	G	A	b38	rs4830987	6.2e-08	0.38	Brain - Hypothalamus
ENSG00000130234.10	ACE2	chrX	15695950	G	A	b38	rs5936013	6.2e-08	0.38	Brain - Hypothalamus
ENSG00000130234.10	ACE2	chrX	15698680	A	T	b38	rs5936016	6.2e-08	0.38	Brain - Hypothalamus
ENSG00000130234.10	ACE2	chrX	15698764	T	C	b38	rs5936017	6.2e-08	0.38	Brain - Hypothalamus
ENSG00000130234.10	ACE2	chrX	15702202	A	G	b38	rs1877923	6.2e-08	0.38	Brain - Hypothalamus
ENSG00000130234.10	ACE2	chrX	15702557	CTG	C	b38	rs35373086	6.2e-08	0.38	Brain - Hypothalamus
ENSG00000130234.10	ACE2	chrX	15702600	C	T	b38	rs5934267	6.2e-08	0.38	Brain - Hypothalamus
ENSG00000130234.10	ACE2	chrX	15707807	G	T	b38	rs2873135	6.2e-08	0.38	Brain - Hypothalamus
ENSG00000130234.10	ACE2	chrX	15708300	C	T	b38	rs5936021	6.2e-08	0.38	Brain - Hypothalamus
ENSG00000130234.10	ACE2	chrX	15709365	G	C	b38	rs4830546	6.2e-08	0.38	Brain - Hypothalamus
ENSG00000130234.10	ACE2	chrX	15713217	T	C	b38	rs6527633	6.2e-08	0.38	Brain - Hypothalamus
ENSG00000130234.10	ACE2	chrX	15713432	G	A	b38	rs1811781	6.2e-08	0.38	Brain - Hypothalamus
ENSG00000130234.10	ACE2	chrX	15713496	G	T	b38	rs2012660	6.2e-08	0.38	Brain - Hypothalamus
ENSG00000130234.10	ACE2	chrX	15715881	C	T	b38	rs5936026	6.2e-08	0.38	Brain - Hypothalamus
ENSG00000130234.10	ACE2	chrX	15718136	C	G	b38	rs1849864	6.2e-08	0.38	Brain - Hypothalamus
ENSG00000130234.10	ACE2	chrX	15658294	G	A	b38	rs4830974	6.3e-08	0.2	Artery - Tibial
ENSG00000130234.10	ACE2	chrX	15660059	G	A	b38	rs4830975	6.3e-08	0.2	Artery - Tibial
ENSG00000130234.10	ACE2	chrX	15667361	C	A	b38	rs4830976	6.3e-08	0.2	Artery - Tibial
ENSG00000130234.10	ACE2	chrX	15667422	C	G	b38	rs4830544	6.3e-08	0.2	Artery - Tibial
ENSG00000130234.10	ACE2	chrX	15667464	C	T	b38	rs4830545	6.3e-08	0.2	Artery - Tibial
ENSG00000130234.10	ACE2	chrX	15671586	G	C	b38	rs1533363	6.3e-08	0.2	Artery - Tibial
ENSG00000130234.10	ACE2	chrX	15673559	C	A	b38	rs1554087	6.3e-08	0.2	Artery - Tibial
ENSG00000130234.10	ACE2	chrX	15673898	T	A	b38	rs5934262	6.3e-08	0.2	Artery - Tibial
ENSG00000130234.10	ACE2	chrX	15674316	A	C	b38	rs4830977	6.3e-08	0.2	Artery - Tibial
ENSG00000130234.10	ACE2	chrX	15674699	T	C	b38	rs4830978	6.3e-08	0.2	Artery - Tibial
ENSG00000130234.10	ACE2	chrX	15675244	A	G	b38	rs4830979	6.3e-08	0.2	Artery - Tibial
ENSG00000130234.10	ACE2	chrX	15675338	T	A	b38	rs4830980	6.3e-08	0.2	Artery - Tibial
ENSG00000130234.10	ACE2	chrX	15676066	A	C	b38	rs997294	6.3e-08	0.2	Artery - Tibial
ENSG00000130234.10	ACE2	chrX	15676490	T	C	b38	rs7065227	6.3e-08	0.2	Artery - Tibial
ENSG00000130234.10	ACE2	chrX	15682840	G	A	b38	rs4830982	6.3e-08	0.2	Artery - Tibial
ENSG00000130234.10	ACE2	chrX	15685402	A	G	b38	rs6632710	6.3e-08	0.2	Artery - Tibial
ENSG00000130234.10	ACE2	chrX	15690021	G	A	b38	rs6527627	6.3e-08	0.2	Artery - Tibial
ENSG00000130234.10	ACE2	chrX	15694830	G	A	b38	rs4830987	6.3e-08	0.2	Artery - Tibial
ENSG00000130234.10	ACE2	chrX	15698680	A	T	b38	rs5936016	6.3e-08	0.2	Artery - Tibial
ENSG00000130234.10	ACE2	chrX	15698764	T	C	b38	rs5936017	6.3e-08	0.2	Artery - Tibial
ENSG00000130234.10	ACE2	chrX	15702202	A	G	b38	rs1877923	6.3e-08	0.2	Artery - Tibial
ENSG00000130234.10	ACE2	chrX	15702557	CTG	C	b38	rs35373086	6.3e-08	0.2	Artery - Tibial
ENSG00000130234.10	ACE2	chrX	15702600	C	T	b38	rs5934267	6.3e-08	0.2	Artery - Tibial
ENSG00000130234.10	ACE2	chrX	15707807	G	T	b38	rs2873135	6.3e-08	0.2	Artery - Tibial
ENSG00000130234.10	ACE2	chrX	15708300	C	T	b38	rs5936021	6.3e-08	0.2	Artery - Tibial
ENSG00000130234.10	ACE2	chrX	15709365	G	C	b38	rs4830546	6.3e-08	0.2	Artery - Tibial
ENSG00000130234.10	ACE2	chrX	15713217	T	C	b38	rs6527633	6.3e-08	0.2	Artery - Tibial
ENSG00000130234.10	ACE2	chrX	15713432	G	A	b38	rs1811781	6.3e-08	0.2	Artery - Tibial
ENSG00000130234.10	ACE2	chrX	15713496	G	T	b38	rs2012660	6.3e-08	0.2	Artery - Tibial
ENSG00000130234.10	ACE2	chrX	15715881	C	T	b38	rs5936026	6.3e-08	0.2	Artery - Tibial
ENSG00000130234.10	ACE2	chrX	15718136	C	G	b38	rs1849864	6.3e-08	0.2	Artery - Tibial
ENSG00000130234.10	ACE2	chrX	15780104	A	G	b38	rs5980186	6.4e-08	-0.19	Nerve - Tibial
ENSG00000130234.10	ACE2	chrX	15783207	A	C	b38	rs12841514	6.4e-08	-0.19	Nerve - Tibial
ENSG00000130234.10	ACE2	chrX	15786861	G	A	b38	rs10521650	6.4e-08	-0.19	Nerve - Tibial
ENSG00000130234.10	ACE2	chrX	15787668	A	G	b38	rs5021752	6.4e-08	-0.19	Nerve - Tibial
ENSG00000130234.10	ACE2	chrX	15607860	T	G	b38	rs5934250	6.4e-08	0.21	Artery - Tibial
ENSG00000130234.10	ACE2	chrX	15599938	A	G	b38	rs2106809	6.4e-08	0.22	Nerve - Tibial
ENSG00000130234.10	ACE2	chrX	15590829	C	T	b38	rs757066	6.4e-08	0.39	Brain - Caudate (basal ganglia)
ENSG00000130234.10	ACE2	chrX	15723284	A	C	b38	rs4830547	7.4e-08	0.46	Brain - Anterior cingulate cortex (BA24)
ENSG00000130234.10	ACE2	chrX	15693086	C	T	b38	rs1996225	7.6e-08	0.2	Artery - Tibial
ENSG00000130234.10	ACE2	chrX	15792103	A	G	b38	rs12556714	8.2e-08	0.19	Nerve - Tibial
ENSG00000130234.10	ACE2	chrX	15630842	T	C	b38	rs12689012	8.5e-08	0.2	Nerve - Tibial
ENSG00000130234.10	ACE2	chrX	15631329	A	G	b38	rs1515009	8.5e-08	0.2	Nerve - Tibial
ENSG00000130234.10	ACE2	chrX	15632163	G	A	b38	rs6527618	8.5e-08	0.2	Nerve - Tibial
ENSG00000130234.10	ACE2	chrX	15633075	C	T	b38	rs6527619	8.5e-08	0.2	Nerve - Tibial
ENSG00000130234.10	ACE2	chrX	15633116	C	T	b38	rs6527620	8.5e-08	0.2	Nerve - Tibial
ENSG00000130234.10	ACE2	chrX	15633251	A	G	b38	rs6629111	8.5e-08	0.2	Nerve - Tibial
ENSG00000130234.10	ACE2	chrX	15638467	C	CA	b38	rs5901568	8.5e-08	0.2	Nerve - Tibial
ENSG00000130234.10	ACE2	chrX	15641760	C	T	b38	rs6632685	8.5e-08	0.2	Nerve - Tibial
ENSG00000130234.10	ACE2	chrX	15641844	T	C	b38	rs56137184	8.5e-08	0.2	Nerve - Tibial
ENSG00000130234.10	ACE2	chrX	15643094	C	T	b38	rs5935999	8.5e-08	0.2	Nerve - Tibial
ENSG00000130234.10	ACE2	chrX	15645250	C	T	b38	rs3810721	8.5e-08	0.2	Nerve - Tibial
ENSG00000130234.10	ACE2	chrX	15646260	G	A	b38	rs6632688	8.5e-08	0.2	Nerve - Tibial
ENSG00000130234.10	ACE2	chrX	15648432	A	T	b38	rs6632690	8.5e-08	0.2	Nerve - Tibial
ENSG00000130234.10	ACE2	chrX	15648501	T	C	b38	rs6632691	8.5e-08	0.2	Nerve - Tibial
ENSG00000130234.10	ACE2	chrX	15651136	T	C	b38	rs5936003	8.5e-08	0.2	Nerve - Tibial
ENSG00000130234.10	ACE2	chrX	15651488	T	G	b38	rs6629115	8.5e-08	0.2	Nerve - Tibial
ENSG00000130234.10	ACE2	chrX	15651747	C	T	b38	rs6632693	8.5e-08	0.2	Nerve - Tibial
ENSG00000130234.10	ACE2	chrX	15653227	T	G	b38	rs1877924	8.5e-08	0.2	Nerve - Tibial
ENSG00000130234.10	ACE2	chrX	15599613	G	A	b38	rs4646120	8.6e-08	0.4	Brain - Cerebellum
ENSG00000130234.10	ACE2	chrX	15721189	C	T	b38	rs5936029	8.8e-08	0.46	Brain - Anterior cingulate cortex (BA24)
ENSG00000130234.10	ACE2	chrX	15579712	C	T	b38	rs4646153	9.3e-08	0.38	Brain - Caudate (basal ganglia)
ENSG00000130234.10	ACE2	chrX	15579901	A	G	b38	rs4646152	9.3e-08	0.38	Brain - Caudate (basal ganglia)
ENSG00000130234.10	ACE2	chrX	15582092	A	C	b38	rs2048684	9.3e-08	0.38	Brain - Caudate (basal ganglia)
ENSG00000130234.10	ACE2	chrX	15582568	C	T	b38	rs2316904	9.3e-08	0.38	Brain - Caudate (basal ganglia)
ENSG00000130234.10	ACE2	chrX	15582621	T	A	b38	rs4646147	9.3e-08	0.38	Brain - Caudate (basal ganglia)
ENSG00000130234.10	ACE2	chrX	15582756	C	CA	b38	rs773423496	9.3e-08	0.38	Brain - Caudate (basal ganglia)
ENSG00000130234.10	ACE2	chrX	15583151	G	T	b38	rs2316903	9.3e-08	0.38	Brain - Caudate (basal ganglia)
ENSG00000130234.10	ACE2	chrX	15590829	C	T	b38	rs757066	1e-07	0.44	Brain - Cortex
ENSG00000130234.10	ACE2	chrX	15631440	T	TA	b38	rs35736648	1.1e-07	0.21	Nerve - Tibial
ENSG00000130234.10	ACE2	chrX	15635868	C	T	b38	rs6632684	1.1e-07	0.21	Nerve - Tibial
ENSG00000130234.10	ACE2	chrX	15637334	A	G	b38	rs5935996	1.1e-07	0.21	Nerve - Tibial
ENSG00000130234.10	ACE2	chrX	15640647	T	C	b38	rs41492646	1.1e-07	0.21	Nerve - Tibial
ENSG00000130234.10	ACE2	chrX	15599613	G	A	b38	rs4646120	1.2e-07	0.38	Brain - Caudate (basal ganglia)
ENSG00000130234.10	ACE2	chrX	15682937	A	C	b38	rs4830983	1.4e-07	0.2	Artery - Tibial
ENSG00000130234.10	ACE2	chrX	15626097	G	A	b38	rs2158082	1.4e-07	0.44	Brain - Anterior cingulate cortex (BA24)
ENSG00000130234.10	ACE2	chrX	15655444	T	C	b38	rs4830971	1.4e-07	0.44	Brain - Anterior cingulate cortex (BA24)
ENSG00000130234.10	ACE2	chrX	15655746	G	A	b38	rs4830972	1.4e-07	0.44	Brain - Anterior cingulate cortex (BA24)
ENSG00000130234.10	ACE2	chrX	15723284	A	C	b38	rs4830547	1.5e-07	0.2	Artery - Tibial
ENSG00000130234.10	ACE2	chrX	15654035	A	C	b38	rs5934257	1.5e-07	0.44	Brain - Anterior cingulate cortex (BA24)
ENSG00000130234.10	ACE2	chrX	15654035	A	C	b38	rs5934257	1.5e-07	0.44	Brain - Putamen (basal ganglia)
ENSG00000130234.10	ACE2	chrX	15643040	A	G	b38	rs5934254	1.6e-07	0.44	Brain - Anterior cingulate cortex (BA24)
ENSG00000130234.10	ACE2	chrX	15646921	C	G	b38	rs5934256	1.6e-07	0.44	Brain - Anterior cingulate cortex (BA24)
ENSG00000130234.10	ACE2	chrX	15655180	C	T	b38	rs5934259	1.6e-07	0.44	Brain - Anterior cingulate cortex (BA24)
ENSG00000130234.10	ACE2	chrX	15654183	C	T	b38	rs5934258	1.8e-07	0.21	Nerve - Tibial
ENSG00000130234.10	ACE2	chrX	15675427	G	GGGCGCGGTCCTTACGTGT	b38	rs200781818	1.9e-07	0.38	Brain - Hypothalamus
ENSG00000130234.10	ACE2	chrX	15629578	A	G	b38	rs2106806	1.9e-07	0.44	Brain - Anterior cingulate cortex (BA24)
ENSG00000130234.10	ACE2	chrX	15625554	GA	G	b38	rs56369428	1.9e-07	0.37	Brain - Hypothalamus
ENSG00000130234.10	ACE2	chrX	15725522	C	G	b38	rs5934270	1.9e-07	0.21	Nerve - Tibial
ENSG00000130234.10	ACE2	chrX	15679923	C	T	b38	rs5936011	1.9e-07	0.2	Artery - Tibial
ENSG00000130234.10	ACE2	chrX	15700755	A	G	b38	rs5936018	1.9e-07	0.2	Artery - Tibial
ENSG00000130234.10	ACE2	chrX	15705022	T	C	b38	rs5936019	1.9e-07	0.2	Artery - Tibial
ENSG00000130234.10	ACE2	chrX	15625554	GA	G	b38	rs56369428	2e-07	0.42	Brain - Anterior cingulate cortex (BA24)
ENSG00000130234.10	ACE2	chrX	15668176	C	A	b38	rs6632704	2e-07	0.43	Brain - Substantia nigra
ENSG00000130234.10	ACE2	chrX	15674766	C	G	b38	rs5936010	2e-07	0.43	Brain - Substantia nigra
ENSG00000130234.10	ACE2	chrX	15675734	C	T	b38	rs5934263	2e-07	0.43	Brain - Substantia nigra
ENSG00000130234.10	ACE2	chrX	15676365	C	T	b38	rs997300	2e-07	0.43	Brain - Substantia nigra
ENSG00000130234.10	ACE2	chrX	15682709	T	C	b38	rs4830981	2e-07	0.43	Brain - Substantia nigra
ENSG00000130234.10	ACE2	chrX	15683622	A	T	b38	rs4830985	2e-07	0.43	Brain - Substantia nigra
ENSG00000130234.10	ACE2	chrX	15689209	GGCTT	G	b38	rs34093185	2e-07	0.43	Brain - Substantia nigra
ENSG00000130234.10	ACE2	chrX	15691078	A	T	b38	rs6632713	2e-07	0.43	Brain - Substantia nigra
ENSG00000130234.10	ACE2	chrX	15691331	T	C	b38	rs6629119	2e-07	0.43	Brain - Substantia nigra
ENSG00000130234.10	ACE2	chrX	15693789	T	G	b38	rs7062378	2e-07	0.43	Brain - Substantia nigra
ENSG00000130234.10	ACE2	chrX	15698322	A	G	b38	rs5936015	2e-07	0.43	Brain - Substantia nigra
ENSG00000130234.10	ACE2	chrX	15705881	A	G	b38	rs5934268	2e-07	0.43	Brain - Substantia nigra
ENSG00000130234.10	ACE2	chrX	15706752	A	G	b38	rs5936020	2e-07	0.43	Brain - Substantia nigra
ENSG00000130234.10	ACE2	chrX	15709854	G	A	b38	rs5936023	2e-07	0.43	Brain - Substantia nigra
ENSG00000130234.10	ACE2	chrX	15712496	G	A	b38	rs1515008	2e-07	0.43	Brain - Substantia nigra
ENSG00000130234.10	ACE2	chrX	15713643	C	G	b38	rs2012671	2e-07	0.43	Brain - Substantia nigra
ENSG00000130234.10	ACE2	chrX	15715871	A	G	b38	rs5934269	2e-07	0.43	Brain - Substantia nigra
ENSG00000130234.10	ACE2	chrX	15599940	T	C	b38	rs1978124	2e-07	0.43	Brain - Anterior cingulate cortex (BA24)
ENSG00000130234.10	ACE2	chrX	15578020	C	CATAAG	b38	rs113691336	2.2e-07	0.43	Brain - Cortex
ENSG00000130234.10	ACE2	chrX	15596540	G	GT	b38	rs768560726	2.2e-07	0.43	Brain - Cortex
ENSG00000130234.10	ACE2	chrX	15625156	T	C	b38	rs6629110	2.3e-07	0.36	Brain - Hypothalamus
ENSG00000130234.10	ACE2	chrX	15721189	C	T	b38	rs5936029	2.3e-07	0.2	Artery - Tibial
ENSG00000130234.10	ACE2	chrX	15607860	T	G	b38	rs5934250	2.4e-07	0.43	Brain - Anterior cingulate cortex (BA24)
ENSG00000130234.10	ACE2	chrX	15624602	ATGGATTGTGTT	A	b38	rs66462812	2.4e-07	0.43	Brain - Anterior cingulate cortex (BA24)
ENSG00000130234.10	ACE2	chrX	15661440	G	C	b38	rs5934261	2.6e-07	0.43	Brain - Substantia nigra
ENSG00000130234.10	ACE2	chrX	15663575	TAACA	T	b38	rs138992236	2.6e-07	0.43	Brain - Substantia nigra
ENSG00000130234.10	ACE2	chrX	15679923	C	T	b38	rs5936011	2.7e-07	0.37	Brain - Hypothalamus
ENSG00000130234.10	ACE2	chrX	15682937	A	C	b38	rs4830983	2.7e-07	0.37	Brain - Hypothalamus
ENSG00000130234.10	ACE2	chrX	15700755	A	G	b38	rs5936018	2.7e-07	0.37	Brain - Hypothalamus
ENSG00000130234.10	ACE2	chrX	15705022	T	C	b38	rs5936019	2.7e-07	0.37	Brain - Hypothalamus
ENSG00000130234.10	ACE2	chrX	15590829	C	T	b38	rs757066	2.8e-07	0.44	Brain - Anterior cingulate cortex (BA24)
ENSG00000130234.10	ACE2	chrX	15589527	T	C	b38	rs971249	2.8e-07	0.44	Brain - Anterior cingulate cortex (BA24)
ENSG00000130234.10	ACE2	chrX	15590263	C	T	b38	rs2158083	2.8e-07	0.44	Brain - Anterior cingulate cortex (BA24)
ENSG00000130234.10	ACE2	chrX	15590376	T	G	b38	rs2048683	2.8e-07	0.44	Brain - Anterior cingulate cortex (BA24)
ENSG00000130234.10	ACE2	chrX	15599613	G	A	b38	rs4646120	2.9e-07	0.43	Brain - Anterior cingulate cortex (BA24)
ENSG00000130234.10	ACE2	chrX	15578020	C	CATAAG	b38	rs113691336	2.9e-07	0.41	Brain - Frontal Cortex (BA9)
ENSG00000130234.10	ACE2	chrX	15596540	G	GT	b38	rs768560726	2.9e-07	0.41	Brain - Frontal Cortex (BA9)
ENSG00000130234.10	ACE2	chrX	15784677	C	G	b38	rs5980189	3e-07	-0.18	Nerve - Tibial
ENSG00000130234.10	ACE2	chrX	15786263	T	TA	b38	rs35824487	3e-07	-0.18	Nerve - Tibial
ENSG00000130234.10	ACE2	chrX	15586742	G	A	b38	rs1514279	3.1e-07	0.44	Brain - Anterior cingulate cortex (BA24)
ENSG00000130234.10	ACE2	chrX	15671816	A	G	b38	rs5936009	3.1e-07	0.2	Nerve - Tibial
ENSG00000130234.10	ACE2	chrX	15693441	G	A	b38	rs6629120	3.1e-07	0.21	Nerve - Tibial
ENSG00000130234.10	ACE2	chrX	15696773	C	T	b38	rs5934266	3.1e-07	0.21	Nerve - Tibial
ENSG00000130234.10	ACE2	chrX	15718633	A	G	b38	rs6632722	3.1e-07	0.21	Nerve - Tibial
ENSG00000130234.10	ACE2	chrX	15681200	A	G	b38	rs2056086	3.3e-07	0.2	Nerve - Tibial
ENSG00000130234.10	ACE2	chrX	15692108	A	G	b38	rs5936012	3.3e-07	0.2	Nerve - Tibial
ENSG00000130234.10	ACE2	chrX	15645250	C	T	b38	rs3810721	3.5e-07	0.47	Brain - Cortex
ENSG00000130234.10	ACE2	chrX	15646260	G	A	b38	rs6632688	3.5e-07	0.47	Brain - Cortex
ENSG00000130234.10	ACE2	chrX	15648432	A	T	b38	rs6632690	3.5e-07	0.47	Brain - Cortex
ENSG00000130234.10	ACE2	chrX	15648501	T	C	b38	rs6632691	3.5e-07	0.47	Brain - Cortex
ENSG00000130234.10	ACE2	chrX	15651488	T	G	b38	rs6629115	3.5e-07	0.47	Brain - Cortex
ENSG00000130234.10	ACE2	chrX	15651747	C	T	b38	rs6632693	3.5e-07	0.47	Brain - Cortex
ENSG00000130234.10	ACE2	chrX	15579712	C	T	b38	rs4646153	3.7e-07	0.43	Brain - Anterior cingulate cortex (BA24)
ENSG00000130234.10	ACE2	chrX	15579901	A	G	b38	rs4646152	3.7e-07	0.43	Brain - Anterior cingulate cortex (BA24)
ENSG00000130234.10	ACE2	chrX	15582092	A	C	b38	rs2048684	3.7e-07	0.43	Brain - Anterior cingulate cortex (BA24)
ENSG00000130234.10	ACE2	chrX	15582568	C	T	b38	rs2316904	3.7e-07	0.43	Brain - Anterior cingulate cortex (BA24)
ENSG00000130234.10	ACE2	chrX	15582621	T	A	b38	rs4646147	3.7e-07	0.43	Brain - Anterior cingulate cortex (BA24)
ENSG00000130234.10	ACE2	chrX	15582756	C	CA	b38	rs773423496	3.7e-07	0.43	Brain - Anterior cingulate cortex (BA24)
ENSG00000130234.10	ACE2	chrX	15583151	G	T	b38	rs2316903	3.7e-07	0.43	Brain - Anterior cingulate cortex (BA24)
ENSG00000130234.10	ACE2	chrX	15581769	T	TTTAA	b38	rs138373349	3.7e-07	0.35	Brain - Caudate (basal ganglia)
ENSG00000130234.10	ACE2	chrX	15792481	C	T	b38	rs6527642	3.8e-07	0.17	Nerve - Tibial
ENSG00000130234.10	ACE2	chrX	15675427	G	GGGCGCGGTCCTTACGTGT	b38	rs200781818	3.9e-07	0.43	Brain - Substantia nigra
ENSG00000130234.10	ACE2	chrX	15731193	A	AT	b38	rs35593267	4.5e-07	-0.39	Brain - Nucleus accumbens (basal ganglia)
ENSG00000130234.10	ACE2	chrX	15625156	T	C	b38	rs6629110	4.5e-07	0.4	Brain - Anterior cingulate cortex (BA24)
ENSG00000130234.10	ACE2	chrX	15654035	A	C	b38	rs5934257	4.7e-07	0.36	Brain - Hypothalamus
ENSG00000130234.10	ACE2	chrX	15578920	A	T	b38	rs4646156	4.9e-07	0.43	Brain - Anterior cingulate cortex (BA24)
ENSG00000130234.10	ACE2	chrX	15594320	GA	G	b38	rs4646131	4.9e-07	0.43	Brain - Anterior cingulate cortex (BA24)
ENSG00000130234.10	ACE2	chrX	15596022	G	A	b38	rs2023802	4.9e-07	0.43	Brain - Anterior cingulate cortex (BA24)
ENSG00000130234.10	ACE2	chrX	15597330	A	G	b38	rs4646127	4.9e-07	0.43	Brain - Anterior cingulate cortex (BA24)
ENSG00000130234.10	ACE2	chrX	15597980	C	CA	b38	rs34481900	4.9e-07	0.43	Brain - Anterior cingulate cortex (BA24)
ENSG00000130234.10	ACE2	chrX	15598673	T	C	b38	rs4646124	4.9e-07	0.43	Brain - Anterior cingulate cortex (BA24)
ENSG00000130234.10	ACE2	chrX	15685387	C	T	b38	rs5934265	5.1e-07	0.2	Nerve - Tibial
ENSG00000130234.10	ACE2	chrX	15715875	G	T	b38	rs5936025	5.1e-07	0.2	Nerve - Tibial
ENSG00000130234.10	ACE2	chrX	15666122	C	A	b38	rs6629118	5.3e-07	0.2	Nerve - Tibial
ENSG00000130234.10	ACE2	chrX	15667060	AC	A	b38	rs56019589	5.3e-07	0.2	Nerve - Tibial
ENSG00000130234.10	ACE2	chrX	15667094	G	A	b38	rs5936008	5.3e-07	0.2	Nerve - Tibial
ENSG00000130234.10	ACE2	chrX	15667470	G	A	b38	rs111608093	5.3e-07	0.2	Nerve - Tibial
ENSG00000130234.10	ACE2	chrX	15667545	C	T	b38	rs73437956	5.3e-07	0.2	Nerve - Tibial
ENSG00000130234.10	ACE2	chrX	15689430	T	C	b38	rs6632711	5.3e-07	0.2	Nerve - Tibial
ENSG00000130234.10	ACE2	chrX	15780367	C	G	b38	rs5980188	5.4e-07	-0.17	Nerve - Tibial
ENSG00000130234.10	ACE2	chrX	15782282	A	G	b38	rs12011117	5.4e-07	-0.17	Nerve - Tibial
ENSG00000130234.10	ACE2	chrX	15612712	A	C	b38	rs6632680	5.4e-07	0.35	Brain - Hypothalamus
ENSG00000130234.10	ACE2	chrX	15584941	G	C	b38	rs4646142	5.5e-07	0.44	Brain - Nucleus accumbens (basal ganglia)
ENSG00000130234.10	ACE2	chrX	15592225	C	T	b38	rs2285666	5.5e-07	0.44	Brain - Nucleus accumbens (basal ganglia)
ENSG00000130234.10	ACE2	chrX	15578920	A	T	b38	rs4646156	5.5e-07	0.39	Brain - Frontal Cortex (BA9)
ENSG00000130234.10	ACE2	chrX	15594320	GA	G	b38	rs4646131	5.5e-07	0.39	Brain - Frontal Cortex (BA9)
ENSG00000130234.10	ACE2	chrX	15596022	G	A	b38	rs2023802	5.5e-07	0.39	Brain - Frontal Cortex (BA9)
ENSG00000130234.10	ACE2	chrX	15597330	A	G	b38	rs4646127	5.5e-07	0.39	Brain - Frontal Cortex (BA9)
ENSG00000130234.10	ACE2	chrX	15597980	C	CA	b38	rs34481900	5.5e-07	0.39	Brain - Frontal Cortex (BA9)
ENSG00000130234.10	ACE2	chrX	15598673	T	C	b38	rs4646124	5.5e-07	0.39	Brain - Frontal Cortex (BA9)
ENSG00000130234.10	ACE2	chrX	15578020	C	CATAAG	b38	rs113691336	5.7e-07	0.43	Brain - Anterior cingulate cortex (BA24)
ENSG00000130234.10	ACE2	chrX	15596540	G	GT	b38	rs768560726	5.7e-07	0.43	Brain - Anterior cingulate cortex (BA24)
ENSG00000130234.10	ACE2	chrX	15581769	T	TTTAA	b38	rs138373349	5.8e-07	0.4	Brain - Frontal Cortex (BA9)
ENSG00000130234.10	ACE2	chrX	15780460	A	G	b38	rs12851844	5.9e-07	-0.17	Nerve - Tibial
ENSG00000130234.10	ACE2	chrX	15612712	A	C	b38	rs6632680	5.9e-07	0.4	Brain - Anterior cingulate cortex (BA24)
ENSG00000130234.10	ACE2	chrX	15725522	C	G	b38	rs5934270	7e-07	0.43	Brain - Hypothalamus
ENSG00000130234.10	ACE2	chrX	15635868	C	T	b38	rs6632684	7.2e-07	0.49	Brain - Cortex
ENSG00000130234.10	ACE2	chrX	15654183	C	T	b38	rs5934258	7.2e-07	0.49	Brain - Cortex
ENSG00000130234.10	ACE2	chrX	15544039	C	T	b38	rs233567	7.6e-07	0.37	Brain - Caudate (basal ganglia)
ENSG00000130234.10	ACE2	chrX	15581769	T	TTTAA	b38	rs138373349	7.9e-07	0.4	Brain - Cortex
ENSG00000130234.10	ACE2	chrX	15635613	C	T	b38	rs5934253	8.4e-07	0.43	Brain - Hypothalamus
ENSG00000130234.10	ACE2	chrX	15645642	C	G	b38	rs5936001	8.4e-07	0.43	Brain - Hypothalamus
ENSG00000130234.10	ACE2	chrX	15645735	A	C	b38	rs5936002	8.4e-07	0.43	Brain - Hypothalamus
ENSG00000130234.10	ACE2	chrX	15578920	A	T	b38	rs4646156	8.9e-07	0.34	Brain - Caudate (basal ganglia)
ENSG00000130234.10	ACE2	chrX	15594320	GA	G	b38	rs4646131	8.9e-07	0.34	Brain - Caudate (basal ganglia)
ENSG00000130234.10	ACE2	chrX	15596022	G	A	b38	rs2023802	8.9e-07	0.34	Brain - Caudate (basal ganglia)
ENSG00000130234.10	ACE2	chrX	15597330	A	G	b38	rs4646127	8.9e-07	0.34	Brain - Caudate (basal ganglia)
ENSG00000130234.10	ACE2	chrX	15597980	C	CA	b38	rs34481900	8.9e-07	0.34	Brain - Caudate (basal ganglia)
ENSG00000130234.10	ACE2	chrX	15598673	T	C	b38	rs4646124	8.9e-07	0.34	Brain - Caudate (basal ganglia)
ENSG00000130234.10	ACE2	chrX	15793607	A	T	b38	rs4830995	9.3e-07	0.17	Nerve - Tibial
ENSG00000130234.10	ACE2	chrX	15590829	C	T	b38	rs757066	9.5e-07	0.39	Brain - Frontal Cortex (BA9)
ENSG00000130234.10	ACE2	chrX	15635868	C	T	b38	rs6632684	1e-06	0.44	Brain - Hypothalamus
ENSG00000130234.10	ACE2	chrX	15654183	C	T	b38	rs5934258	1e-06	0.44	Brain - Hypothalamus
ENSG00000130234.10	ACE2	chrX	15666122	C	A	b38	rs6629118	1e-06	0.44	Brain - Hypothalamus
ENSG00000130234.10	ACE2	chrX	15667060	AC	A	b38	rs56019589	1e-06	0.44	Brain - Hypothalamus
ENSG00000130234.10	ACE2	chrX	15667094	G	A	b38	rs5936008	1e-06	0.44	Brain - Hypothalamus
ENSG00000130234.10	ACE2	chrX	15667470	G	A	b38	rs111608093	1e-06	0.44	Brain - Hypothalamus
ENSG00000130234.10	ACE2	chrX	15667545	C	T	b38	rs73437956	1e-06	0.44	Brain - Hypothalamus
ENSG00000130234.10	ACE2	chrX	15671816	A	G	b38	rs5936009	1e-06	0.44	Brain - Hypothalamus
ENSG00000130234.10	ACE2	chrX	15681200	A	G	b38	rs2056086	1e-06	0.44	Brain - Hypothalamus
ENSG00000130234.10	ACE2	chrX	15685387	C	T	b38	rs5934265	1e-06	0.44	Brain - Hypothalamus
ENSG00000130234.10	ACE2	chrX	15689430	T	C	b38	rs6632711	1e-06	0.44	Brain - Hypothalamus
ENSG00000130234.10	ACE2	chrX	15692108	A	G	b38	rs5936012	1e-06	0.44	Brain - Hypothalamus
ENSG00000130234.10	ACE2	chrX	15693441	G	A	b38	rs6629120	1e-06	0.44	Brain - Hypothalamus
ENSG00000130234.10	ACE2	chrX	15696773	C	T	b38	rs5934266	1e-06	0.44	Brain - Hypothalamus
ENSG00000130234.10	ACE2	chrX	15715875	G	T	b38	rs5936025	1e-06	0.44	Brain - Hypothalamus
ENSG00000130234.10	ACE2	chrX	15718633	A	G	b38	rs6632722	1e-06	0.44	Brain - Hypothalamus
ENSG00000130234.10	ACE2	chrX	15546343	C	T	b38	rs233568	1e-06	0.36	Brain - Caudate (basal ganglia)
ENSG00000130234.10	ACE2	chrX	15546631	C	T	b38	rs233569	1e-06	0.36	Brain - Caudate (basal ganglia)
ENSG00000130234.10	ACE2	chrX	15543378	C	T	b38	rs233576	1.1e-06	0.36	Brain - Caudate (basal ganglia)
ENSG00000130234.10	ACE2	chrX	15599938	A	G	b38	rs2106809	1.1e-06	0.45	Brain - Nucleus accumbens (basal ganglia)
ENSG00000130234.10	ACE2	chrX	15688707	C	A	b38	rs4060	1.1e-06	0.4	Brain - Substantia nigra
ENSG00000130234.10	ACE2	chrX	15695950	G	A	b38	rs5936013	1.1e-06	0.4	Brain - Substantia nigra
ENSG00000130234.10	ACE2	chrX	15657187	T	C	b38	rs6632698	1.1e-06	0.19	Nerve - Tibial
ENSG00000130234.10	ACE2	chrX	15586742	G	A	b38	rs1514279	1.1e-06	0.34	Brain - Caudate (basal ganglia)
ENSG00000130234.10	ACE2	chrX	15639988	T	C	b38	rs990432	1.2e-06	0.41	Brain - Hypothalamus
ENSG00000130234.10	ACE2	chrX	15644812	T	C	b38	rs5936000	1.2e-06	0.41	Brain - Hypothalamus
ENSG00000130234.10	ACE2	chrX	15650009	C	G	b38	rs6629114	1.2e-06	0.41	Brain - Hypothalamus
ENSG00000130234.10	ACE2	chrX	15654681	T	C	b38	rs6632695	1.2e-06	0.41	Brain - Hypothalamus
ENSG00000130234.10	ACE2	chrX	15721189	C	T	b38	rs5936029	1.2e-06	0.35	Brain - Hypothalamus
ENSG00000130234.10	ACE2	chrX	15723284	A	C	b38	rs4830547	1.2e-06	0.35	Brain - Hypothalamus
ENSG00000130234.10	ACE2	chrX	15688707	C	A	b38	rs4060	1.2e-06	0.43	Brain - Amygdala
ENSG00000130234.10	ACE2	chrX	15695950	G	A	b38	rs5936013	1.2e-06	0.43	Brain - Amygdala
ENSG00000130234.10	ACE2	chrX	15590829	C	T	b38	rs757066	1.2e-06	0.37	Brain - Nucleus accumbens (basal ganglia)
ENSG00000130234.10	ACE2	chrX	15625554	GA	G	b38	rs56369428	1.3e-06	0.41	Brain - Substantia nigra
ENSG00000130234.10	ACE2	chrX	15737797	GTGTT	G	b38	rs35251171	1.3e-06	-0.37	Brain - Nucleus accumbens (basal ganglia)
ENSG00000130234.10	ACE2	chrX	15510246	T	A	b38	rs979848	1.3e-06	0.36	Brain - Caudate (basal ganglia)
ENSG00000130234.10	ACE2	chrX	15534056	T	G	b38	rs1399200	1.3e-06	0.36	Brain - Caudate (basal ganglia)
ENSG00000130234.10	ACE2	chrX	15579712	C	T	b38	rs4646153	1.3e-06	0.4	Brain - Cortex
ENSG00000130234.10	ACE2	chrX	15579901	A	G	b38	rs4646152	1.3e-06	0.4	Brain - Cortex
ENSG00000130234.10	ACE2	chrX	15582092	A	C	b38	rs2048684	1.3e-06	0.4	Brain - Cortex
ENSG00000130234.10	ACE2	chrX	15582568	C	T	b38	rs2316904	1.3e-06	0.4	Brain - Cortex
ENSG00000130234.10	ACE2	chrX	15582621	T	A	b38	rs4646147	1.3e-06	0.4	Brain - Cortex
ENSG00000130234.10	ACE2	chrX	15582756	C	CA	b38	rs773423496	1.3e-06	0.4	Brain - Cortex
ENSG00000130234.10	ACE2	chrX	15583151	G	T	b38	rs2316903	1.3e-06	0.4	Brain - Cortex
ENSG00000130234.10	ACE2	chrX	15721189	C	T	b38	rs5936029	1.4e-06	0.38	Brain - Cerebellum
ENSG00000130234.10	ACE2	chrX	15723284	A	C	b38	rs4830547	1.4e-06	0.38	Brain - Cerebellum
ENSG00000130234.10	ACE2	chrX	15586742	G	A	b38	rs1514279	1.4e-06	0.38	Brain - Frontal Cortex (BA9)
ENSG00000130234.10	ACE2	chrX	15579712	C	T	b38	rs4646153	1.5e-06	0.38	Brain - Frontal Cortex (BA9)
ENSG00000130234.10	ACE2	chrX	15579901	A	G	b38	rs4646152	1.5e-06	0.38	Brain - Frontal Cortex (BA9)
ENSG00000130234.10	ACE2	chrX	15582092	A	C	b38	rs2048684	1.5e-06	0.38	Brain - Frontal Cortex (BA9)
ENSG00000130234.10	ACE2	chrX	15582568	C	T	b38	rs2316904	1.5e-06	0.38	Brain - Frontal Cortex (BA9)
ENSG00000130234.10	ACE2	chrX	15582621	T	A	b38	rs4646147	1.5e-06	0.38	Brain - Frontal Cortex (BA9)
ENSG00000130234.10	ACE2	chrX	15582756	C	CA	b38	rs773423496	1.5e-06	0.38	Brain - Frontal Cortex (BA9)
ENSG00000130234.10	ACE2	chrX	15583151	G	T	b38	rs2316903	1.5e-06	0.38	Brain - Frontal Cortex (BA9)
ENSG00000130234.10	ACE2	chrX	15635868	C	T	b38	rs6632684	1.5e-06	0.44	Brain - Nucleus accumbens (basal ganglia)
ENSG00000130234.10	ACE2	chrX	15654183	C	T	b38	rs5934258	1.5e-06	0.44	Brain - Nucleus accumbens (basal ganglia)
ENSG00000130234.10	ACE2	chrX	15666122	C	A	b38	rs6629118	1.5e-06	0.44	Brain - Nucleus accumbens (basal ganglia)
ENSG00000130234.10	ACE2	chrX	15667060	AC	A	b38	rs56019589	1.5e-06	0.44	Brain - Nucleus accumbens (basal ganglia)
ENSG00000130234.10	ACE2	chrX	15667094	G	A	b38	rs5936008	1.5e-06	0.44	Brain - Nucleus accumbens (basal ganglia)
ENSG00000130234.10	ACE2	chrX	15667470	G	A	b38	rs111608093	1.5e-06	0.44	Brain - Nucleus accumbens (basal ganglia)
ENSG00000130234.10	ACE2	chrX	15667545	C	T	b38	rs73437956	1.5e-06	0.44	Brain - Nucleus accumbens (basal ganglia)
ENSG00000130234.10	ACE2	chrX	15671816	A	G	b38	rs5936009	1.5e-06	0.44	Brain - Nucleus accumbens (basal ganglia)
ENSG00000130234.10	ACE2	chrX	15681200	A	G	b38	rs2056086	1.5e-06	0.44	Brain - Nucleus accumbens (basal ganglia)
ENSG00000130234.10	ACE2	chrX	15685387	C	T	b38	rs5934265	1.5e-06	0.44	Brain - Nucleus accumbens (basal ganglia)
ENSG00000130234.10	ACE2	chrX	15689430	T	C	b38	rs6632711	1.5e-06	0.44	Brain - Nucleus accumbens (basal ganglia)
ENSG00000130234.10	ACE2	chrX	15692108	A	G	b38	rs5936012	1.5e-06	0.44	Brain - Nucleus accumbens (basal ganglia)
ENSG00000130234.10	ACE2	chrX	15693441	G	A	b38	rs6629120	1.5e-06	0.44	Brain - Nucleus accumbens (basal ganglia)
ENSG00000130234.10	ACE2	chrX	15696773	C	T	b38	rs5934266	1.5e-06	0.44	Brain - Nucleus accumbens (basal ganglia)
ENSG00000130234.10	ACE2	chrX	15715875	G	T	b38	rs5936025	1.5e-06	0.44	Brain - Nucleus accumbens (basal ganglia)
ENSG00000130234.10	ACE2	chrX	15718633	A	G	b38	rs6632722	1.5e-06	0.44	Brain - Nucleus accumbens (basal ganglia)
ENSG00000130234.10	ACE2	chrX	15578020	C	CATAAG	b38	rs113691336	1.6e-06	0.37	Brain - Nucleus accumbens (basal ganglia)
ENSG00000130234.10	ACE2	chrX	15596540	G	GT	b38	rs768560726	1.6e-06	0.37	Brain - Nucleus accumbens (basal ganglia)
ENSG00000130234.10	ACE2	chrX	15626097	G	A	b38	rs2158082	1.6e-06	0.35	Brain - Hypothalamus
ENSG00000130234.10	ACE2	chrX	15643040	A	G	b38	rs5934254	1.6e-06	0.35	Brain - Hypothalamus
ENSG00000130234.10	ACE2	chrX	15646921	C	G	b38	rs5934256	1.6e-06	0.35	Brain - Hypothalamus
ENSG00000130234.10	ACE2	chrX	15655180	C	T	b38	rs5934259	1.6e-06	0.35	Brain - Hypothalamus
ENSG00000130234.10	ACE2	chrX	15655444	T	C	b38	rs4830971	1.6e-06	0.35	Brain - Hypothalamus
ENSG00000130234.10	ACE2	chrX	15655746	G	A	b38	rs4830972	1.6e-06	0.35	Brain - Hypothalamus
ENSG00000130234.10	ACE2	chrX	15625156	T	C	b38	rs6629110	1.6e-06	0.4	Brain - Substantia nigra
ENSG00000130234.10	ACE2	chrX	15631440	T	TA	b38	rs35736648	1.6e-06	0.42	Brain - Hypothalamus
ENSG00000130234.10	ACE2	chrX	15637334	A	G	b38	rs5935996	1.6e-06	0.42	Brain - Hypothalamus
ENSG00000130234.10	ACE2	chrX	15640647	T	C	b38	rs41492646	1.6e-06	0.42	Brain - Hypothalamus
ENSG00000130234.10	ACE2	chrX	15557256	A	C	b38	rs1132186	1.6e-06	0.41	Brain - Substantia nigra
ENSG00000130234.10	ACE2	chrX	15658294	G	A	b38	rs4830974	1.6e-06	0.4	Brain - Substantia nigra
ENSG00000130234.10	ACE2	chrX	15660059	G	A	b38	rs4830975	1.6e-06	0.4	Brain - Substantia nigra
ENSG00000130234.10	ACE2	chrX	15666611	A	G	b38	rs5936007	1.6e-06	0.4	Brain - Substantia nigra
ENSG00000130234.10	ACE2	chrX	15667361	C	A	b38	rs4830976	1.6e-06	0.4	Brain - Substantia nigra
ENSG00000130234.10	ACE2	chrX	15667422	C	G	b38	rs4830544	1.6e-06	0.4	Brain - Substantia nigra
ENSG00000130234.10	ACE2	chrX	15667464	C	T	b38	rs4830545	1.6e-06	0.4	Brain - Substantia nigra
ENSG00000130234.10	ACE2	chrX	15671586	G	C	b38	rs1533363	1.6e-06	0.4	Brain - Substantia nigra
ENSG00000130234.10	ACE2	chrX	15673559	C	A	b38	rs1554087	1.6e-06	0.4	Brain - Substantia nigra
ENSG00000130234.10	ACE2	chrX	15673898	T	A	b38	rs5934262	1.6e-06	0.4	Brain - Substantia nigra
ENSG00000130234.10	ACE2	chrX	15674316	A	C	b38	rs4830977	1.6e-06	0.4	Brain - Substantia nigra
ENSG00000130234.10	ACE2	chrX	15674699	T	C	b38	rs4830978	1.6e-06	0.4	Brain - Substantia nigra
ENSG00000130234.10	ACE2	chrX	15675244	A	G	b38	rs4830979	1.6e-06	0.4	Brain - Substantia nigra
ENSG00000130234.10	ACE2	chrX	15675338	T	A	b38	rs4830980	1.6e-06	0.4	Brain - Substantia nigra
ENSG00000130234.10	ACE2	chrX	15676066	A	C	b38	rs997294	1.6e-06	0.4	Brain - Substantia nigra
ENSG00000130234.10	ACE2	chrX	15676490	T	C	b38	rs7065227	1.6e-06	0.4	Brain - Substantia nigra
ENSG00000130234.10	ACE2	chrX	15676654	A	G	b38	rs10521649	1.6e-06	0.4	Brain - Substantia nigra
ENSG00000130234.10	ACE2	chrX	15682840	G	A	b38	rs4830982	1.6e-06	0.4	Brain - Substantia nigra
ENSG00000130234.10	ACE2	chrX	15685402	A	G	b38	rs6632710	1.6e-06	0.4	Brain - Substantia nigra
ENSG00000130234.10	ACE2	chrX	15690021	G	A	b38	rs6527627	1.6e-06	0.4	Brain - Substantia nigra
ENSG00000130234.10	ACE2	chrX	15694830	G	A	b38	rs4830987	1.6e-06	0.4	Brain - Substantia nigra
ENSG00000130234.10	ACE2	chrX	15698680	A	T	b38	rs5936016	1.6e-06	0.4	Brain - Substantia nigra
ENSG00000130234.10	ACE2	chrX	15698764	T	C	b38	rs5936017	1.6e-06	0.4	Brain - Substantia nigra
ENSG00000130234.10	ACE2	chrX	15702202	A	G	b38	rs1877923	1.6e-06	0.4	Brain - Substantia nigra
ENSG00000130234.10	ACE2	chrX	15702557	CTG	C	b38	rs35373086	1.6e-06	0.4	Brain - Substantia nigra
ENSG00000130234.10	ACE2	chrX	15702600	C	T	b38	rs5934267	1.6e-06	0.4	Brain - Substantia nigra
ENSG00000130234.10	ACE2	chrX	15707807	G	T	b38	rs2873135	1.6e-06	0.4	Brain - Substantia nigra
ENSG00000130234.10	ACE2	chrX	15708300	C	T	b38	rs5936021	1.6e-06	0.4	Brain - Substantia nigra
ENSG00000130234.10	ACE2	chrX	15709365	G	C	b38	rs4830546	1.6e-06	0.4	Brain - Substantia nigra
ENSG00000130234.10	ACE2	chrX	15713217	T	C	b38	rs6527633	1.6e-06	0.4	Brain - Substantia nigra
ENSG00000130234.10	ACE2	chrX	15713432	G	A	b38	rs1811781	1.6e-06	0.4	Brain - Substantia nigra
ENSG00000130234.10	ACE2	chrX	15713496	G	T	b38	rs2012660	1.6e-06	0.4	Brain - Substantia nigra
ENSG00000130234.10	ACE2	chrX	15715881	C	T	b38	rs5936026	1.6e-06	0.4	Brain - Substantia nigra
ENSG00000130234.10	ACE2	chrX	15718136	C	G	b38	rs1849864	1.6e-06	0.4	Brain - Substantia nigra
ENSG00000130234.10	ACE2	chrX	15589527	T	C	b38	rs971249	1.7e-06	0.38	Brain - Frontal Cortex (BA9)
ENSG00000130234.10	ACE2	chrX	15590263	C	T	b38	rs2158083	1.7e-06	0.38	Brain - Frontal Cortex (BA9)
ENSG00000130234.10	ACE2	chrX	15590376	T	G	b38	rs2048683	1.7e-06	0.38	Brain - Frontal Cortex (BA9)
ENSG00000130234.10	ACE2	chrX	15581769	T	TTTAA	b38	rs138373349	1.7e-06	0.4	Brain - Anterior cingulate cortex (BA24)
ENSG00000130234.10	ACE2	chrX	15660010	C	T	b38	rs5934260	1.7e-06	0.4	Brain - Substantia nigra
ENSG00000130234.10	ACE2	chrX	15662833	C	A	b38	rs5936006	1.7e-06	0.4	Brain - Substantia nigra
ENSG00000130234.10	ACE2	chrX	15663053	A	T	b38	rs6632702	1.7e-06	0.4	Brain - Substantia nigra
ENSG00000130234.10	ACE2	chrX	15663897	G	T	b38	rs5978732	1.7e-06	0.4	Brain - Substantia nigra
ENSG00000130234.10	ACE2	chrX	15589527	T	C	b38	rs971249	1.8e-06	0.33	Brain - Caudate (basal ganglia)
ENSG00000130234.10	ACE2	chrX	15590263	C	T	b38	rs2158083	1.8e-06	0.33	Brain - Caudate (basal ganglia)
ENSG00000130234.10	ACE2	chrX	15590376	T	G	b38	rs2048683	1.8e-06	0.33	Brain - Caudate (basal ganglia)
ENSG00000130234.10	ACE2	chrX	15525037	A	G	b38	rs4830965	1.8e-06	0.35	Brain - Caudate (basal ganglia)
ENSG00000130234.10	ACE2	chrX	15525038	A	G	b38	rs4830966	1.8e-06	0.35	Brain - Caudate (basal ganglia)
ENSG00000130234.10	ACE2	chrX	15849804	CCTT	C	b38	rs199871378	1.8e-06	-0.41	Brain - Caudate (basal ganglia)
ENSG00000130234.10	ACE2	chrX	15675427	G	GGGCGCGGTCCTTACGTGT	b38	rs200781818	1.8e-06	0.43	Brain - Amygdala
ENSG00000130234.10	ACE2	chrX	15578020	C	CATAAG	b38	rs113691336	1.9e-06	0.43	Brain - Substantia nigra
ENSG00000130234.10	ACE2	chrX	15596540	G	GT	b38	rs768560726	1.9e-06	0.43	Brain - Substantia nigra
ENSG00000130234.10	ACE2	chrX	15682937	A	C	b38	rs4830983	2e-06	0.43	Brain - Substantia nigra
ENSG00000130234.10	ACE2	chrX	15607860	T	G	b38	rs5934250	2e-06	0.35	Brain - Hypothalamus
ENSG00000130234.10	ACE2	chrX	15624602	ATGGATTGTGTT	A	b38	rs66462812	2e-06	0.35	Brain - Hypothalamus
ENSG00000130234.10	ACE2	chrX	15635613	C	T	b38	rs5934253	2.1e-06	0.44	Brain - Cortex
ENSG00000130234.10	ACE2	chrX	15645642	C	G	b38	rs5936001	2.1e-06	0.44	Brain - Cortex
ENSG00000130234.10	ACE2	chrX	15645735	A	C	b38	rs5936002	2.1e-06	0.44	Brain - Cortex
ENSG00000130234.10	ACE2	chrX	15658294	G	A	b38	rs4830974	2.4e-06	0.43	Brain - Amygdala
ENSG00000130234.10	ACE2	chrX	15660059	G	A	b38	rs4830975	2.4e-06	0.43	Brain - Amygdala
ENSG00000130234.10	ACE2	chrX	15666611	A	G	b38	rs5936007	2.4e-06	0.43	Brain - Amygdala
ENSG00000130234.10	ACE2	chrX	15667361	C	A	b38	rs4830976	2.4e-06	0.43	Brain - Amygdala
ENSG00000130234.10	ACE2	chrX	15667422	C	G	b38	rs4830544	2.4e-06	0.43	Brain - Amygdala
ENSG00000130234.10	ACE2	chrX	15667464	C	T	b38	rs4830545	2.4e-06	0.43	Brain - Amygdala
ENSG00000130234.10	ACE2	chrX	15671586	G	C	b38	rs1533363	2.4e-06	0.43	Brain - Amygdala
ENSG00000130234.10	ACE2	chrX	15673559	C	A	b38	rs1554087	2.4e-06	0.43	Brain - Amygdala
ENSG00000130234.10	ACE2	chrX	15673898	T	A	b38	rs5934262	2.4e-06	0.43	Brain - Amygdala
ENSG00000130234.10	ACE2	chrX	15674316	A	C	b38	rs4830977	2.4e-06	0.43	Brain - Amygdala
ENSG00000130234.10	ACE2	chrX	15674699	T	C	b38	rs4830978	2.4e-06	0.43	Brain - Amygdala
ENSG00000130234.10	ACE2	chrX	15675244	A	G	b38	rs4830979	2.4e-06	0.43	Brain - Amygdala
ENSG00000130234.10	ACE2	chrX	15675338	T	A	b38	rs4830980	2.4e-06	0.43	Brain - Amygdala
ENSG00000130234.10	ACE2	chrX	15676066	A	C	b38	rs997294	2.4e-06	0.43	Brain - Amygdala
ENSG00000130234.10	ACE2	chrX	15676490	T	C	b38	rs7065227	2.4e-06	0.43	Brain - Amygdala
ENSG00000130234.10	ACE2	chrX	15676654	A	G	b38	rs10521649	2.4e-06	0.43	Brain - Amygdala
ENSG00000130234.10	ACE2	chrX	15682840	G	A	b38	rs4830982	2.4e-06	0.43	Brain - Amygdala
ENSG00000130234.10	ACE2	chrX	15685402	A	G	b38	rs6632710	2.4e-06	0.43	Brain - Amygdala
ENSG00000130234.10	ACE2	chrX	15690021	G	A	b38	rs6527627	2.4e-06	0.43	Brain - Amygdala
ENSG00000130234.10	ACE2	chrX	15694830	G	A	b38	rs4830987	2.4e-06	0.43	Brain - Amygdala
ENSG00000130234.10	ACE2	chrX	15698680	A	T	b38	rs5936016	2.4e-06	0.43	Brain - Amygdala
ENSG00000130234.10	ACE2	chrX	15698764	T	C	b38	rs5936017	2.4e-06	0.43	Brain - Amygdala
ENSG00000130234.10	ACE2	chrX	15702202	A	G	b38	rs1877923	2.4e-06	0.43	Brain - Amygdala
ENSG00000130234.10	ACE2	chrX	15702557	CTG	C	b38	rs35373086	2.4e-06	0.43	Brain - Amygdala
ENSG00000130234.10	ACE2	chrX	15702600	C	T	b38	rs5934267	2.4e-06	0.43	Brain - Amygdala
ENSG00000130234.10	ACE2	chrX	15707807	G	T	b38	rs2873135	2.4e-06	0.43	Brain - Amygdala
ENSG00000130234.10	ACE2	chrX	15708300	C	T	b38	rs5936021	2.4e-06	0.43	Brain - Amygdala
ENSG00000130234.10	ACE2	chrX	15709365	G	C	b38	rs4830546	2.4e-06	0.43	Brain - Amygdala
ENSG00000130234.10	ACE2	chrX	15713217	T	C	b38	rs6527633	2.4e-06	0.43	Brain - Amygdala
ENSG00000130234.10	ACE2	chrX	15713432	G	A	b38	rs1811781	2.4e-06	0.43	Brain - Amygdala
ENSG00000130234.10	ACE2	chrX	15713496	G	T	b38	rs2012660	2.4e-06	0.43	Brain - Amygdala
ENSG00000130234.10	ACE2	chrX	15715881	C	T	b38	rs5936026	2.4e-06	0.43	Brain - Amygdala
ENSG00000130234.10	ACE2	chrX	15718136	C	G	b38	rs1849864	2.4e-06	0.43	Brain - Amygdala
ENSG00000130234.10	ACE2	chrX	15578920	A	T	b38	rs4646156	2.4e-06	0.41	Brain - Substantia nigra
ENSG00000130234.10	ACE2	chrX	15594320	GA	G	b38	rs4646131	2.4e-06	0.41	Brain - Substantia nigra
ENSG00000130234.10	ACE2	chrX	15596022	G	A	b38	rs2023802	2.4e-06	0.41	Brain - Substantia nigra
ENSG00000130234.10	ACE2	chrX	15597330	A	G	b38	rs4646127	2.4e-06	0.41	Brain - Substantia nigra
ENSG00000130234.10	ACE2	chrX	15597980	C	CA	b38	rs34481900	2.4e-06	0.41	Brain - Substantia nigra
ENSG00000130234.10	ACE2	chrX	15598673	T	C	b38	rs4646124	2.4e-06	0.41	Brain - Substantia nigra
ENSG00000130234.10	ACE2	chrX	15721189	C	T	b38	rs5936029	2.5e-06	0.45	Brain - Amygdala
ENSG00000130234.10	ACE2	chrX	15723284	A	C	b38	rs4830547	2.5e-06	0.45	Brain - Amygdala
ENSG00000130234.10	ACE2	chrX	15693086	C	T	b38	rs1996225	2.6e-06	0.39	Brain - Substantia nigra
ENSG00000130234.10	ACE2	chrX	15693086	C	T	b38	rs1996225	2.6e-06	0.37	Brain - Cerebellar Hemisphere
ENSG00000130234.10	ACE2	chrX	15589527	T	C	b38	rs971249	2.7e-06	0.35	Brain - Nucleus accumbens (basal ganglia)
ENSG00000130234.10	ACE2	chrX	15590263	C	T	b38	rs2158083	2.7e-06	0.35	Brain - Nucleus accumbens (basal ganglia)
ENSG00000130234.10	ACE2	chrX	15590376	T	G	b38	rs2048683	2.7e-06	0.35	Brain - Nucleus accumbens (basal ganglia)
ENSG00000130234.10	ACE2	chrX	15590829	C	T	b38	rs757066	2.7e-06	0.42	Brain - Substantia nigra
ENSG00000130234.10	ACE2	chrX	15589527	T	C	b38	rs971249	2.7e-06	0.38	Brain - Cortex
ENSG00000130234.10	ACE2	chrX	15590263	C	T	b38	rs2158083	2.7e-06	0.38	Brain - Cortex
ENSG00000130234.10	ACE2	chrX	15590376	T	G	b38	rs2048683	2.7e-06	0.38	Brain - Cortex
ENSG00000130234.10	ACE2	chrX	15558292	GT	G	b38	rs35482260	2.9e-06	0.33	Brain - Caudate (basal ganglia)
ENSG00000130234.10	ACE2	chrX	15645250	C	T	b38	rs3810721	2.9e-06	0.41	Brain - Nucleus accumbens (basal ganglia)
ENSG00000130234.10	ACE2	chrX	15646260	G	A	b38	rs6632688	2.9e-06	0.41	Brain - Nucleus accumbens (basal ganglia)
ENSG00000130234.10	ACE2	chrX	15648432	A	T	b38	rs6632690	2.9e-06	0.41	Brain - Nucleus accumbens (basal ganglia)
ENSG00000130234.10	ACE2	chrX	15648501	T	C	b38	rs6632691	2.9e-06	0.41	Brain - Nucleus accumbens (basal ganglia)
ENSG00000130234.10	ACE2	chrX	15651488	T	G	b38	rs6629115	2.9e-06	0.41	Brain - Nucleus accumbens (basal ganglia)
ENSG00000130234.10	ACE2	chrX	15651747	C	T	b38	rs6632693	2.9e-06	0.41	Brain - Nucleus accumbens (basal ganglia)
ENSG00000130234.10	ACE2	chrX	15564843	G	A	b38	rs233575	3.1e-06	0.35	Brain - Caudate (basal ganglia)
ENSG00000130234.10	ACE2	chrX	15537764	C	T	b38	rs5935991	3.1e-06	0.33	Brain - Caudate (basal ganglia)
ENSG00000130234.10	ACE2	chrX	15679923	C	T	b38	rs5936011	3.1e-06	0.41	Brain - Substantia nigra
ENSG00000130234.10	ACE2	chrX	15700755	A	G	b38	rs5936018	3.1e-06	0.41	Brain - Substantia nigra
ENSG00000130234.10	ACE2	chrX	15705022	T	C	b38	rs5936019	3.1e-06	0.41	Brain - Substantia nigra
ENSG00000130234.10	ACE2	chrX	15679923	C	T	b38	rs5936011	3.1e-06	0.44	Brain - Amygdala
ENSG00000130234.10	ACE2	chrX	15682937	A	C	b38	rs4830983	3.1e-06	0.44	Brain - Amygdala
ENSG00000130234.10	ACE2	chrX	15700755	A	G	b38	rs5936018	3.1e-06	0.44	Brain - Amygdala
ENSG00000130234.10	ACE2	chrX	15705022	T	C	b38	rs5936019	3.1e-06	0.44	Brain - Amygdala
ENSG00000130234.10	ACE2	chrX	15658294	G	A	b38	rs4830974	3.1e-06	0.37	Brain - Cerebellar Hemisphere
ENSG00000130234.10	ACE2	chrX	15660059	G	A	b38	rs4830975	3.1e-06	0.37	Brain - Cerebellar Hemisphere
ENSG00000130234.10	ACE2	chrX	15666611	A	G	b38	rs5936007	3.1e-06	0.37	Brain - Cerebellar Hemisphere
ENSG00000130234.10	ACE2	chrX	15667361	C	A	b38	rs4830976	3.1e-06	0.37	Brain - Cerebellar Hemisphere
ENSG00000130234.10	ACE2	chrX	15667422	C	G	b38	rs4830544	3.1e-06	0.37	Brain - Cerebellar Hemisphere
ENSG00000130234.10	ACE2	chrX	15667464	C	T	b38	rs4830545	3.1e-06	0.37	Brain - Cerebellar Hemisphere
ENSG00000130234.10	ACE2	chrX	15671586	G	C	b38	rs1533363	3.1e-06	0.37	Brain - Cerebellar Hemisphere
ENSG00000130234.10	ACE2	chrX	15673559	C	A	b38	rs1554087	3.1e-06	0.37	Brain - Cerebellar Hemisphere
ENSG00000130234.10	ACE2	chrX	15673898	T	A	b38	rs5934262	3.1e-06	0.37	Brain - Cerebellar Hemisphere
ENSG00000130234.10	ACE2	chrX	15674316	A	C	b38	rs4830977	3.1e-06	0.37	Brain - Cerebellar Hemisphere
ENSG00000130234.10	ACE2	chrX	15674699	T	C	b38	rs4830978	3.1e-06	0.37	Brain - Cerebellar Hemisphere
ENSG00000130234.10	ACE2	chrX	15675244	A	G	b38	rs4830979	3.1e-06	0.37	Brain - Cerebellar Hemisphere
ENSG00000130234.10	ACE2	chrX	15675338	T	A	b38	rs4830980	3.1e-06	0.37	Brain - Cerebellar Hemisphere
ENSG00000130234.10	ACE2	chrX	15676066	A	C	b38	rs997294	3.1e-06	0.37	Brain - Cerebellar Hemisphere
ENSG00000130234.10	ACE2	chrX	15676490	T	C	b38	rs7065227	3.1e-06	0.37	Brain - Cerebellar Hemisphere
ENSG00000130234.10	ACE2	chrX	15676654	A	G	b38	rs10521649	3.1e-06	0.37	Brain - Cerebellar Hemisphere
ENSG00000130234.10	ACE2	chrX	15682840	G	A	b38	rs4830982	3.1e-06	0.37	Brain - Cerebellar Hemisphere
ENSG00000130234.10	ACE2	chrX	15685402	A	G	b38	rs6632710	3.1e-06	0.37	Brain - Cerebellar Hemisphere
ENSG00000130234.10	ACE2	chrX	15690021	G	A	b38	rs6527627	3.1e-06	0.37	Brain - Cerebellar Hemisphere
ENSG00000130234.10	ACE2	chrX	15694830	G	A	b38	rs4830987	3.1e-06	0.37	Brain - Cerebellar Hemisphere
ENSG00000130234.10	ACE2	chrX	15698680	A	T	b38	rs5936016	3.1e-06	0.37	Brain - Cerebellar Hemisphere
ENSG00000130234.10	ACE2	chrX	15698764	T	C	b38	rs5936017	3.1e-06	0.37	Brain - Cerebellar Hemisphere
ENSG00000130234.10	ACE2	chrX	15702202	A	G	b38	rs1877923	3.1e-06	0.37	Brain - Cerebellar Hemisphere
ENSG00000130234.10	ACE2	chrX	15702557	CTG	C	b38	rs35373086	3.1e-06	0.37	Brain - Cerebellar Hemisphere
ENSG00000130234.10	ACE2	chrX	15702600	C	T	b38	rs5934267	3.1e-06	0.37	Brain - Cerebellar Hemisphere
ENSG00000130234.10	ACE2	chrX	15707807	G	T	b38	rs2873135	3.1e-06	0.37	Brain - Cerebellar Hemisphere
ENSG00000130234.10	ACE2	chrX	15708300	C	T	b38	rs5936021	3.1e-06	0.37	Brain - Cerebellar Hemisphere
ENSG00000130234.10	ACE2	chrX	15709365	G	C	b38	rs4830546	3.1e-06	0.37	Brain - Cerebellar Hemisphere
ENSG00000130234.10	ACE2	chrX	15713217	T	C	b38	rs6527633	3.1e-06	0.37	Brain - Cerebellar Hemisphere
ENSG00000130234.10	ACE2	chrX	15713432	G	A	b38	rs1811781	3.1e-06	0.37	Brain - Cerebellar Hemisphere
ENSG00000130234.10	ACE2	chrX	15713496	G	T	b38	rs2012660	3.1e-06	0.37	Brain - Cerebellar Hemisphere
ENSG00000130234.10	ACE2	chrX	15715881	C	T	b38	rs5936026	3.1e-06	0.37	Brain - Cerebellar Hemisphere
ENSG00000130234.10	ACE2	chrX	15718136	C	G	b38	rs1849864	3.1e-06	0.37	Brain - Cerebellar Hemisphere
ENSG00000130234.10	ACE2	chrX	15599938	A	G	b38	rs2106809	3.1e-06	0.41	Brain - Hypothalamus
ENSG00000130234.10	ACE2	chrX	15660010	C	T	b38	rs5934260	3.1e-06	0.42	Brain - Amygdala
ENSG00000130234.10	ACE2	chrX	15662833	C	A	b38	rs5936006	3.1e-06	0.42	Brain - Amygdala
ENSG00000130234.10	ACE2	chrX	15663053	A	T	b38	rs6632702	3.1e-06	0.42	Brain - Amygdala
ENSG00000130234.10	ACE2	chrX	15663897	G	T	b38	rs5978732	3.1e-06	0.42	Brain - Amygdala
ENSG00000130234.10	ACE2	chrX	15578920	A	T	b38	rs4646156	3.1e-06	0.35	Brain - Nucleus accumbens (basal ganglia)
ENSG00000130234.10	ACE2	chrX	15594320	GA	G	b38	rs4646131	3.1e-06	0.35	Brain - Nucleus accumbens (basal ganglia)
ENSG00000130234.10	ACE2	chrX	15596022	G	A	b38	rs2023802	3.1e-06	0.35	Brain - Nucleus accumbens (basal ganglia)
ENSG00000130234.10	ACE2	chrX	15597330	A	G	b38	rs4646127	3.1e-06	0.35	Brain - Nucleus accumbens (basal ganglia)
ENSG00000130234.10	ACE2	chrX	15597980	C	CA	b38	rs34481900	3.1e-06	0.35	Brain - Nucleus accumbens (basal ganglia)
ENSG00000130234.10	ACE2	chrX	15598673	T	C	b38	rs4646124	3.1e-06	0.35	Brain - Nucleus accumbens (basal ganglia)
ENSG00000130234.10	ACE2	chrX	15578920	A	T	b38	rs4646156	3.2e-06	0.37	Brain - Cortex
ENSG00000130234.10	ACE2	chrX	15594320	GA	G	b38	rs4646131	3.2e-06	0.37	Brain - Cortex
ENSG00000130234.10	ACE2	chrX	15596022	G	A	b38	rs2023802	3.2e-06	0.37	Brain - Cortex
ENSG00000130234.10	ACE2	chrX	15597330	A	G	b38	rs4646127	3.2e-06	0.37	Brain - Cortex
ENSG00000130234.10	ACE2	chrX	15597980	C	CA	b38	rs34481900	3.2e-06	0.37	Brain - Cortex
ENSG00000130234.10	ACE2	chrX	15598673	T	C	b38	rs4646124	3.2e-06	0.37	Brain - Cortex
ENSG00000130234.10	ACE2	chrX	15777541	C	G	b38	rs5980185	3.3e-06	-0.16	Nerve - Tibial
ENSG00000130234.10	ACE2	chrX	15534441	T	C	b38	rs1877752	3.3e-06	0.4	Brain - Substantia nigra
ENSG00000130234.10	ACE2	chrX	15534450	G	GA	b38	rs34879154	3.3e-06	0.4	Brain - Substantia nigra
ENSG00000130234.10	ACE2	chrX	15534579	C	T	b38	rs1877753	3.3e-06	0.4	Brain - Substantia nigra
ENSG00000130234.10	ACE2	chrX	15534633	A	G	b38	rs1399201	3.3e-06	0.4	Brain - Substantia nigra
ENSG00000130234.10	ACE2	chrX	15535259	C	G	b38	rs2214266	3.3e-06	0.4	Brain - Substantia nigra
ENSG00000130234.10	ACE2	chrX	15535373	A	G	b38	rs963447	3.3e-06	0.4	Brain - Substantia nigra
ENSG00000130234.10	ACE2	chrX	15535765	TGATA	T	b38	rs35972066	3.3e-06	0.4	Brain - Substantia nigra
ENSG00000130234.10	ACE2	chrX	15721189	C	T	b38	rs5936029	3.3e-06	0.41	Brain - Putamen (basal ganglia)
ENSG00000130234.10	ACE2	chrX	15723284	A	C	b38	rs4830547	3.3e-06	0.41	Brain - Putamen (basal ganglia)
ENSG00000130234.10	ACE2	chrX	15693086	C	T	b38	rs1996225	3.4e-06	0.42	Brain - Amygdala
ENSG00000130234.10	ACE2	chrX	15660010	C	T	b38	rs5934260	3.5e-06	0.37	Brain - Cerebellar Hemisphere
ENSG00000130234.10	ACE2	chrX	15662833	C	A	b38	rs5936006	3.5e-06	0.37	Brain - Cerebellar Hemisphere
ENSG00000130234.10	ACE2	chrX	15663053	A	T	b38	rs6632702	3.5e-06	0.37	Brain - Cerebellar Hemisphere
ENSG00000130234.10	ACE2	chrX	15663897	G	T	b38	rs5978732	3.5e-06	0.37	Brain - Cerebellar Hemisphere
ENSG00000130234.10	ACE2	chrX	15570148	C	G	b38	rs4646174	3.7e-06	0.41	Brain - Substantia nigra
ENSG00000130234.10	ACE2	chrX	15581769	T	TTTAA	b38	rs138373349	3.9e-06	0.41	Brain - Substantia nigra
ENSG00000130234.10	ACE2	chrX	15725522	C	G	b38	rs5934270	4e-06	0.43	Brain - Nucleus accumbens (basal ganglia)
ENSG00000130234.10	ACE2	chrX	15631440	T	TA	b38	rs35736648	4.1e-06	0.42	Brain - Nucleus accumbens (basal ganglia)
ENSG00000130234.10	ACE2	chrX	15637334	A	G	b38	rs5935996	4.1e-06	0.42	Brain - Nucleus accumbens (basal ganglia)
ENSG00000130234.10	ACE2	chrX	15640647	T	C	b38	rs41492646	4.1e-06	0.42	Brain - Nucleus accumbens (basal ganglia)
ENSG00000130234.10	ACE2	chrX	15599940	T	C	b38	rs1978124	4.1e-06	0.34	Brain - Hypothalamus
ENSG00000130234.10	ACE2	chrX	15531829	T	TA	b38	rs35139170	4.1e-06	0.4	Brain - Substantia nigra
ENSG00000130234.10	ACE2	chrX	15533163	G	A	b38	rs5935990	4.1e-06	0.4	Brain - Substantia nigra
ENSG00000130234.10	ACE2	chrX	15533442	G	A	b38	rs4830541	4.1e-06	0.4	Brain - Substantia nigra
ENSG00000130234.10	ACE2	chrX	15555645	A	C	b38	rs2873356	4.2e-06	0.41	Brain - Substantia nigra
ENSG00000130234.10	ACE2	chrX	15626097	G	A	b38	rs2158082	4.6e-06	0.32	Pituitary
ENSG00000130234.10	ACE2	chrX	15643040	A	G	b38	rs5934254	4.6e-06	0.32	Pituitary
ENSG00000130234.10	ACE2	chrX	15646921	C	G	b38	rs5934256	4.6e-06	0.32	Pituitary
ENSG00000130234.10	ACE2	chrX	15655180	C	T	b38	rs5934259	4.6e-06	0.32	Pituitary
ENSG00000130234.10	ACE2	chrX	15655444	T	C	b38	rs4830971	4.6e-06	0.32	Pituitary
ENSG00000130234.10	ACE2	chrX	15655746	G	A	b38	rs4830972	4.6e-06	0.32	Pituitary
ENSG00000130234.10	ACE2	chrX	15679923	C	T	b38	rs5936011	4.6e-06	0.32	Pituitary
ENSG00000130234.10	ACE2	chrX	15682937	A	C	b38	rs4830983	4.6e-06	0.32	Pituitary
ENSG00000130234.10	ACE2	chrX	15700755	A	G	b38	rs5936018	4.6e-06	0.32	Pituitary
ENSG00000130234.10	ACE2	chrX	15705022	T	C	b38	rs5936019	4.6e-06	0.32	Pituitary
ENSG00000130234.10	ACE2	chrX	15688707	C	A	b38	rs4060	4.6e-06	0.37	Brain - Cerebellar Hemisphere
ENSG00000130234.10	ACE2	chrX	15695950	G	A	b38	rs5936013	4.6e-06	0.37	Brain - Cerebellar Hemisphere
ENSG00000130234.10	ACE2	chrX	15668176	C	A	b38	rs6632704	4.7e-06	0.36	Brain - Cerebellar Hemisphere
ENSG00000130234.10	ACE2	chrX	15674766	C	G	b38	rs5936010	4.7e-06	0.36	Brain - Cerebellar Hemisphere
ENSG00000130234.10	ACE2	chrX	15675734	C	T	b38	rs5934263	4.7e-06	0.36	Brain - Cerebellar Hemisphere
ENSG00000130234.10	ACE2	chrX	15676365	C	T	b38	rs997300	4.7e-06	0.36	Brain - Cerebellar Hemisphere
ENSG00000130234.10	ACE2	chrX	15682709	T	C	b38	rs4830981	4.7e-06	0.36	Brain - Cerebellar Hemisphere
ENSG00000130234.10	ACE2	chrX	15683622	A	T	b38	rs4830985	4.7e-06	0.36	Brain - Cerebellar Hemisphere
ENSG00000130234.10	ACE2	chrX	15689209	GGCTT	G	b38	rs34093185	4.7e-06	0.36	Brain - Cerebellar Hemisphere
ENSG00000130234.10	ACE2	chrX	15691078	A	T	b38	rs6632713	4.7e-06	0.36	Brain - Cerebellar Hemisphere
ENSG00000130234.10	ACE2	chrX	15691331	T	C	b38	rs6629119	4.7e-06	0.36	Brain - Cerebellar Hemisphere
ENSG00000130234.10	ACE2	chrX	15693789	T	G	b38	rs7062378	4.7e-06	0.36	Brain - Cerebellar Hemisphere
ENSG00000130234.10	ACE2	chrX	15698322	A	G	b38	rs5936015	4.7e-06	0.36	Brain - Cerebellar Hemisphere
ENSG00000130234.10	ACE2	chrX	15705881	A	G	b38	rs5934268	4.7e-06	0.36	Brain - Cerebellar Hemisphere
ENSG00000130234.10	ACE2	chrX	15706752	A	G	b38	rs5936020	4.7e-06	0.36	Brain - Cerebellar Hemisphere
ENSG00000130234.10	ACE2	chrX	15709854	G	A	b38	rs5936023	4.7e-06	0.36	Brain - Cerebellar Hemisphere
ENSG00000130234.10	ACE2	chrX	15712496	G	A	b38	rs1515008	4.7e-06	0.36	Brain - Cerebellar Hemisphere
ENSG00000130234.10	ACE2	chrX	15713643	C	G	b38	rs2012671	4.7e-06	0.36	Brain - Cerebellar Hemisphere
ENSG00000130234.10	ACE2	chrX	15715871	A	G	b38	rs5934269	4.7e-06	0.36	Brain - Cerebellar Hemisphere
ENSG00000130234.10	ACE2	chrX	15607860	T	G	b38	rs5934250	4.7e-06	0.32	Pituitary
ENSG00000130234.10	ACE2	chrX	15624602	ATGGATTGTGTT	A	b38	rs66462812	4.7e-06	0.32	Pituitary
ENSG00000130234.10	ACE2	chrX	15629578	A	G	b38	rs2106806	4.7e-06	0.32	Pituitary
ENSG00000130234.10	ACE2	chrX	15524413	A	G	b38	rs1399202	4.8e-06	0.38	Brain - Nucleus accumbens (basal ganglia)
ENSG00000130234.10	ACE2	chrX	15470346	T	C	b38	rs4830954	4.8e-06	0.17	Nerve - Tibial
ENSG00000130234.10	ACE2	chrX	15599938	A	G	b38	rs2106809	4.8e-06	0.48	Brain - Frontal Cortex (BA9)
ENSG00000130234.10	ACE2	chrX	15589527	T	C	b38	rs971249	4.8e-06	0.4	Brain - Substantia nigra
ENSG00000130234.10	ACE2	chrX	15590263	C	T	b38	rs2158083	4.8e-06	0.4	Brain - Substantia nigra
ENSG00000130234.10	ACE2	chrX	15590376	T	G	b38	rs2048683	4.8e-06	0.4	Brain - Substantia nigra
ENSG00000130234.10	ACE2	chrX	15666122	C	A	b38	rs6629118	4.8e-06	0.44	Brain - Cortex
ENSG00000130234.10	ACE2	chrX	15667060	AC	A	b38	rs56019589	4.8e-06	0.44	Brain - Cortex
ENSG00000130234.10	ACE2	chrX	15667094	G	A	b38	rs5936008	4.8e-06	0.44	Brain - Cortex
ENSG00000130234.10	ACE2	chrX	15667470	G	A	b38	rs111608093	4.8e-06	0.44	Brain - Cortex
ENSG00000130234.10	ACE2	chrX	15667545	C	T	b38	rs73437956	4.8e-06	0.44	Brain - Cortex
ENSG00000130234.10	ACE2	chrX	15671816	A	G	b38	rs5936009	4.8e-06	0.44	Brain - Cortex
ENSG00000130234.10	ACE2	chrX	15681200	A	G	b38	rs2056086	4.8e-06	0.44	Brain - Cortex
ENSG00000130234.10	ACE2	chrX	15685387	C	T	b38	rs5934265	4.8e-06	0.44	Brain - Cortex
ENSG00000130234.10	ACE2	chrX	15689430	T	C	b38	rs6632711	4.8e-06	0.44	Brain - Cortex
ENSG00000130234.10	ACE2	chrX	15692108	A	G	b38	rs5936012	4.8e-06	0.44	Brain - Cortex
ENSG00000130234.10	ACE2	chrX	15693441	G	A	b38	rs6629120	4.8e-06	0.44	Brain - Cortex
ENSG00000130234.10	ACE2	chrX	15696773	C	T	b38	rs5934266	4.8e-06	0.44	Brain - Cortex
ENSG00000130234.10	ACE2	chrX	15715875	G	T	b38	rs5936025	4.8e-06	0.44	Brain - Cortex
ENSG00000130234.10	ACE2	chrX	15718633	A	G	b38	rs6632722	4.8e-06	0.44	Brain - Cortex
ENSG00000130234.10	ACE2	chrX	15679923	C	T	b38	rs5936011	5.1e-06	0.39	Brain - Cerebellar Hemisphere
ENSG00000130234.10	ACE2	chrX	15682937	A	C	b38	rs4830983	5.1e-06	0.39	Brain - Cerebellar Hemisphere
ENSG00000130234.10	ACE2	chrX	15700755	A	G	b38	rs5936018	5.1e-06	0.39	Brain - Cerebellar Hemisphere
ENSG00000130234.10	ACE2	chrX	15705022	T	C	b38	rs5936019	5.1e-06	0.39	Brain - Cerebellar Hemisphere
ENSG00000130234.10	ACE2	chrX	15661440	G	C	b38	rs5934261	5.1e-06	0.31	Pituitary
ENSG00000130234.10	ACE2	chrX	15663575	TAACA	T	b38	rs138992236	5.1e-06	0.31	Pituitary
ENSG00000130234.10	ACE2	chrX	15668176	C	A	b38	rs6632704	5.1e-06	0.31	Pituitary
ENSG00000130234.10	ACE2	chrX	15674766	C	G	b38	rs5936010	5.1e-06	0.31	Pituitary
ENSG00000130234.10	ACE2	chrX	15675734	C	T	b38	rs5934263	5.1e-06	0.31	Pituitary
ENSG00000130234.10	ACE2	chrX	15676365	C	T	b38	rs997300	5.1e-06	0.31	Pituitary
ENSG00000130234.10	ACE2	chrX	15682709	T	C	b38	rs4830981	5.1e-06	0.31	Pituitary
ENSG00000130234.10	ACE2	chrX	15683622	A	T	b38	rs4830985	5.1e-06	0.31	Pituitary
ENSG00000130234.10	ACE2	chrX	15689209	GGCTT	G	b38	rs34093185	5.1e-06	0.31	Pituitary
ENSG00000130234.10	ACE2	chrX	15691078	A	T	b38	rs6632713	5.1e-06	0.31	Pituitary
ENSG00000130234.10	ACE2	chrX	15691331	T	C	b38	rs6629119	5.1e-06	0.31	Pituitary
ENSG00000130234.10	ACE2	chrX	15693789	T	G	b38	rs7062378	5.1e-06	0.31	Pituitary
ENSG00000130234.10	ACE2	chrX	15698322	A	G	b38	rs5936015	5.1e-06	0.31	Pituitary
ENSG00000130234.10	ACE2	chrX	15705881	A	G	b38	rs5934268	5.1e-06	0.31	Pituitary
ENSG00000130234.10	ACE2	chrX	15706752	A	G	b38	rs5936020	5.1e-06	0.31	Pituitary
ENSG00000130234.10	ACE2	chrX	15709854	G	A	b38	rs5936023	5.1e-06	0.31	Pituitary
ENSG00000130234.10	ACE2	chrX	15712496	G	A	b38	rs1515008	5.1e-06	0.31	Pituitary
ENSG00000130234.10	ACE2	chrX	15713643	C	G	b38	rs2012671	5.1e-06	0.31	Pituitary
ENSG00000130234.10	ACE2	chrX	15715871	A	G	b38	rs5934269	5.1e-06	0.31	Pituitary
ENSG00000130234.10	ACE2	chrX	15629578	A	G	b38	rs2106806	5.2e-06	0.33	Brain - Hypothalamus
ENSG00000130234.10	ACE2	chrX	15581769	T	TTTAA	b38	rs138373349	5.4e-06	0.35	Brain - Nucleus accumbens (basal ganglia)
ENSG00000130234.10	ACE2	chrX	15688395	G	C	b38	rs4830986	5.4e-06	0.39	Brain - Frontal Cortex (BA9)
ENSG00000130234.10	ACE2	chrX	15635613	C	T	b38	rs5934253	5.4e-06	0.41	Brain - Nucleus accumbens (basal ganglia)
ENSG00000130234.10	ACE2	chrX	15645642	C	G	b38	rs5936001	5.4e-06	0.41	Brain - Nucleus accumbens (basal ganglia)
ENSG00000130234.10	ACE2	chrX	15645735	A	C	b38	rs5936002	5.4e-06	0.41	Brain - Nucleus accumbens (basal ganglia)
ENSG00000130234.10	ACE2	chrX	15599613	G	A	b38	rs4646120	5.5e-06	0.39	Brain - Substantia nigra
ENSG00000130234.10	ACE2	chrX	15630842	T	C	b38	rs12689012	5.5e-06	0.42	Brain - Cortex
ENSG00000130234.10	ACE2	chrX	15631329	A	G	b38	rs1515009	5.5e-06	0.42	Brain - Cortex
ENSG00000130234.10	ACE2	chrX	15632163	G	A	b38	rs6527618	5.5e-06	0.42	Brain - Cortex
ENSG00000130234.10	ACE2	chrX	15633075	C	T	b38	rs6527619	5.5e-06	0.42	Brain - Cortex
ENSG00000130234.10	ACE2	chrX	15633116	C	T	b38	rs6527620	5.5e-06	0.42	Brain - Cortex
ENSG00000130234.10	ACE2	chrX	15633251	A	G	b38	rs6629111	5.5e-06	0.42	Brain - Cortex
ENSG00000130234.10	ACE2	chrX	15638467	C	CA	b38	rs5901568	5.5e-06	0.42	Brain - Cortex
ENSG00000130234.10	ACE2	chrX	15641760	C	T	b38	rs6632685	5.5e-06	0.42	Brain - Cortex
ENSG00000130234.10	ACE2	chrX	15641844	T	C	b38	rs56137184	5.5e-06	0.42	Brain - Cortex
ENSG00000130234.10	ACE2	chrX	15643094	C	T	b38	rs5935999	5.5e-06	0.42	Brain - Cortex
ENSG00000130234.10	ACE2	chrX	15651136	T	C	b38	rs5936003	5.5e-06	0.42	Brain - Cortex
ENSG00000130234.10	ACE2	chrX	15653227	T	G	b38	rs1877924	5.5e-06	0.42	Brain - Cortex
ENSG00000130234.10	ACE2	chrX	15675427	G	GGGCGCGGTCCTTACGTGT	b38	rs200781818	5.5e-06	0.36	Brain - Cerebellar Hemisphere
ENSG00000130234.10	ACE2	chrX	15661440	G	C	b38	rs5934261	5.5e-06	0.36	Brain - Cerebellar Hemisphere
ENSG00000130234.10	ACE2	chrX	15663575	TAACA	T	b38	rs138992236	5.5e-06	0.36	Brain - Cerebellar Hemisphere
ENSG00000130234.10	ACE2	chrX	15469136	G	T	b38	rs1567893	5.5e-06	0.17	Nerve - Tibial
ENSG00000130234.10	ACE2	chrX	15625156	T	C	b38	rs6629110	5.6e-06	0.31	Pituitary
ENSG00000130234.10	ACE2	chrX	15625554	GA	G	b38	rs56369428	5.6e-06	0.31	Pituitary
ENSG00000130234.10	ACE2	chrX	15658294	G	A	b38	rs4830974	5.7e-06	0.31	Pituitary
ENSG00000130234.10	ACE2	chrX	15660010	C	T	b38	rs5934260	5.7e-06	0.31	Pituitary
ENSG00000130234.10	ACE2	chrX	15660059	G	A	b38	rs4830975	5.7e-06	0.31	Pituitary
ENSG00000130234.10	ACE2	chrX	15662833	C	A	b38	rs5936006	5.7e-06	0.31	Pituitary
ENSG00000130234.10	ACE2	chrX	15663053	A	T	b38	rs6632702	5.7e-06	0.31	Pituitary
ENSG00000130234.10	ACE2	chrX	15663897	G	T	b38	rs5978732	5.7e-06	0.31	Pituitary
ENSG00000130234.10	ACE2	chrX	15666611	A	G	b38	rs5936007	5.7e-06	0.31	Pituitary
ENSG00000130234.10	ACE2	chrX	15667361	C	A	b38	rs4830976	5.7e-06	0.31	Pituitary
ENSG00000130234.10	ACE2	chrX	15667422	C	G	b38	rs4830544	5.7e-06	0.31	Pituitary
ENSG00000130234.10	ACE2	chrX	15667464	C	T	b38	rs4830545	5.7e-06	0.31	Pituitary
ENSG00000130234.10	ACE2	chrX	15671586	G	C	b38	rs1533363	5.7e-06	0.31	Pituitary
ENSG00000130234.10	ACE2	chrX	15673559	C	A	b38	rs1554087	5.7e-06	0.31	Pituitary
ENSG00000130234.10	ACE2	chrX	15673898	T	A	b38	rs5934262	5.7e-06	0.31	Pituitary
ENSG00000130234.10	ACE2	chrX	15674316	A	C	b38	rs4830977	5.7e-06	0.31	Pituitary
ENSG00000130234.10	ACE2	chrX	15674699	T	C	b38	rs4830978	5.7e-06	0.31	Pituitary
ENSG00000130234.10	ACE2	chrX	15675244	A	G	b38	rs4830979	5.7e-06	0.31	Pituitary
ENSG00000130234.10	ACE2	chrX	15675338	T	A	b38	rs4830980	5.7e-06	0.31	Pituitary
ENSG00000130234.10	ACE2	chrX	15676066	A	C	b38	rs997294	5.7e-06	0.31	Pituitary
ENSG00000130234.10	ACE2	chrX	15676490	T	C	b38	rs7065227	5.7e-06	0.31	Pituitary
ENSG00000130234.10	ACE2	chrX	15676654	A	G	b38	rs10521649	5.7e-06	0.31	Pituitary
ENSG00000130234.10	ACE2	chrX	15682840	G	A	b38	rs4830982	5.7e-06	0.31	Pituitary
ENSG00000130234.10	ACE2	chrX	15685402	A	G	b38	rs6632710	5.7e-06	0.31	Pituitary
ENSG00000130234.10	ACE2	chrX	15690021	G	A	b38	rs6527627	5.7e-06	0.31	Pituitary
ENSG00000130234.10	ACE2	chrX	15694830	G	A	b38	rs4830987	5.7e-06	0.31	Pituitary
ENSG00000130234.10	ACE2	chrX	15698680	A	T	b38	rs5936016	5.7e-06	0.31	Pituitary
ENSG00000130234.10	ACE2	chrX	15698764	T	C	b38	rs5936017	5.7e-06	0.31	Pituitary
ENSG00000130234.10	ACE2	chrX	15702202	A	G	b38	rs1877923	5.7e-06	0.31	Pituitary
ENSG00000130234.10	ACE2	chrX	15702557	CTG	C	b38	rs35373086	5.7e-06	0.31	Pituitary
ENSG00000130234.10	ACE2	chrX	15702600	C	T	b38	rs5934267	5.7e-06	0.31	Pituitary
ENSG00000130234.10	ACE2	chrX	15707807	G	T	b38	rs2873135	5.7e-06	0.31	Pituitary
ENSG00000130234.10	ACE2	chrX	15708300	C	T	b38	rs5936021	5.7e-06	0.31	Pituitary
ENSG00000130234.10	ACE2	chrX	15709365	G	C	b38	rs4830546	5.7e-06	0.31	Pituitary
ENSG00000130234.10	ACE2	chrX	15713217	T	C	b38	rs6527633	5.7e-06	0.31	Pituitary
ENSG00000130234.10	ACE2	chrX	15713432	G	A	b38	rs1811781	5.7e-06	0.31	Pituitary
ENSG00000130234.10	ACE2	chrX	15713496	G	T	b38	rs2012660	5.7e-06	0.31	Pituitary
ENSG00000130234.10	ACE2	chrX	15715881	C	T	b38	rs5936026	5.7e-06	0.31	Pituitary
ENSG00000130234.10	ACE2	chrX	15718136	C	G	b38	rs1849864	5.7e-06	0.31	Pituitary
ENSG00000130234.10	ACE2	chrX	15630842	T	C	b38	rs12689012	5.7e-06	0.4	Brain - Nucleus accumbens (basal ganglia)
ENSG00000130234.10	ACE2	chrX	15631329	A	G	b38	rs1515009	5.7e-06	0.4	Brain - Nucleus accumbens (basal ganglia)
ENSG00000130234.10	ACE2	chrX	15632163	G	A	b38	rs6527618	5.7e-06	0.4	Brain - Nucleus accumbens (basal ganglia)
ENSG00000130234.10	ACE2	chrX	15633075	C	T	b38	rs6527619	5.7e-06	0.4	Brain - Nucleus accumbens (basal ganglia)
ENSG00000130234.10	ACE2	chrX	15633116	C	T	b38	rs6527620	5.7e-06	0.4	Brain - Nucleus accumbens (basal ganglia)
ENSG00000130234.10	ACE2	chrX	15633251	A	G	b38	rs6629111	5.7e-06	0.4	Brain - Nucleus accumbens (basal ganglia)
ENSG00000130234.10	ACE2	chrX	15638467	C	CA	b38	rs5901568	5.7e-06	0.4	Brain - Nucleus accumbens (basal ganglia)
ENSG00000130234.10	ACE2	chrX	15641760	C	T	b38	rs6632685	5.7e-06	0.4	Brain - Nucleus accumbens (basal ganglia)
ENSG00000130234.10	ACE2	chrX	15641844	T	C	b38	rs56137184	5.7e-06	0.4	Brain - Nucleus accumbens (basal ganglia)
ENSG00000130234.10	ACE2	chrX	15643094	C	T	b38	rs5935999	5.7e-06	0.4	Brain - Nucleus accumbens (basal ganglia)
ENSG00000130234.10	ACE2	chrX	15651136	T	C	b38	rs5936003	5.7e-06	0.4	Brain - Nucleus accumbens (basal ganglia)
ENSG00000130234.10	ACE2	chrX	15653227	T	G	b38	rs1877924	5.7e-06	0.4	Brain - Nucleus accumbens (basal ganglia)
ENSG00000130234.10	ACE2	chrX	15612712	A	C	b38	rs6632680	5.7e-06	0.31	Pituitary
ENSG00000130234.10	ACE2	chrX	15586742	G	A	b38	rs1514279	6e-06	0.37	Brain - Cortex
ENSG00000130234.10	ACE2	chrX	15568325	A	G	b38	rs1514280	6.2e-06	0.33	Brain - Caudate (basal ganglia)
ENSG00000130234.10	ACE2	chrX	15693086	C	T	b38	rs1996225	6.4e-06	0.31	Pituitary
ENSG00000130234.10	ACE2	chrX	15721189	C	T	b38	rs5936029	6.6e-06	0.25	Prostate
ENSG00000130234.10	ACE2	chrX	15723284	A	C	b38	rs4830547	6.6e-06	0.25	Prostate
ENSG00000130234.10	ACE2	chrX	15568325	A	G	b38	rs1514280	6.6e-06	0.4	Brain - Substantia nigra
ENSG00000130234.10	ACE2	chrX	15599940	T	C	b38	rs1978124	6.6e-06	0.31	Pituitary
ENSG00000130234.10	ACE2	chrX	15645250	C	T	b38	rs3810721	7.2e-06	0.39	Brain - Hypothalamus
ENSG00000130234.10	ACE2	chrX	15646260	G	A	b38	rs6632688	7.2e-06	0.39	Brain - Hypothalamus
ENSG00000130234.10	ACE2	chrX	15648432	A	T	b38	rs6632690	7.2e-06	0.39	Brain - Hypothalamus
ENSG00000130234.10	ACE2	chrX	15648501	T	C	b38	rs6632691	7.2e-06	0.39	Brain - Hypothalamus
ENSG00000130234.10	ACE2	chrX	15651488	T	G	b38	rs6629115	7.2e-06	0.39	Brain - Hypothalamus
ENSG00000130234.10	ACE2	chrX	15651747	C	T	b38	rs6632693	7.2e-06	0.39	Brain - Hypothalamus
ENSG00000130234.10	ACE2	chrX	15654035	A	C	b38	rs5934257	7.7e-06	0.31	Pituitary
ENSG00000130234.10	ACE2	chrX	15565781	C	G	b38	rs714205	8.1e-06	0.42	Brain - Nucleus accumbens (basal ganglia)
ENSG00000130234.10	ACE2	chrX	15721189	C	T	b38	rs5936029	8.2e-06	0.31	Pituitary
ENSG00000130234.10	ACE2	chrX	15723284	A	C	b38	rs4830547	8.2e-06	0.31	Pituitary
ENSG00000130234.10	ACE2	chrX	15723284	A	C	b38	rs4830547	8.2e-06	0.4	Brain - Substantia nigra
ENSG00000130234.10	ACE2	chrX	15630842	T	C	b38	rs12689012	8.3e-06	0.38	Brain - Hypothalamus
ENSG00000130234.10	ACE2	chrX	15631329	A	G	b38	rs1515009	8.3e-06	0.38	Brain - Hypothalamus
ENSG00000130234.10	ACE2	chrX	15632163	G	A	b38	rs6527618	8.3e-06	0.38	Brain - Hypothalamus
ENSG00000130234.10	ACE2	chrX	15633075	C	T	b38	rs6527619	8.3e-06	0.38	Brain - Hypothalamus
ENSG00000130234.10	ACE2	chrX	15633116	C	T	b38	rs6527620	8.3e-06	0.38	Brain - Hypothalamus
ENSG00000130234.10	ACE2	chrX	15633251	A	G	b38	rs6629111	8.3e-06	0.38	Brain - Hypothalamus
ENSG00000130234.10	ACE2	chrX	15638467	C	CA	b38	rs5901568	8.3e-06	0.38	Brain - Hypothalamus
ENSG00000130234.10	ACE2	chrX	15641760	C	T	b38	rs6632685	8.3e-06	0.38	Brain - Hypothalamus
ENSG00000130234.10	ACE2	chrX	15641844	T	C	b38	rs56137184	8.3e-06	0.38	Brain - Hypothalamus
ENSG00000130234.10	ACE2	chrX	15643094	C	T	b38	rs5935999	8.3e-06	0.38	Brain - Hypothalamus
ENSG00000130234.10	ACE2	chrX	15651136	T	C	b38	rs5936003	8.3e-06	0.38	Brain - Hypothalamus
ENSG00000130234.10	ACE2	chrX	15653227	T	G	b38	rs1877924	8.3e-06	0.38	Brain - Hypothalamus
ENSG00000130234.10	ACE2	chrX	15656962	T	C	b38	rs4830973	8.3e-06	0.38	Brain - Frontal Cortex (BA9)
ENSG00000130234.10	ACE2	chrX	15656998	C	A	b38	rs4830543	8.3e-06	0.38	Brain - Frontal Cortex (BA9)
ENSG00000130234.10	ACE2	chrX	15682995	C	T	b38	rs4830984	8.3e-06	0.38	Brain - Frontal Cortex (BA9)
ENSG00000130234.10	ACE2	chrX	15708323	C	T	b38	rs5936022	8.3e-06	0.38	Brain - Frontal Cortex (BA9)
ENSG00000130234.10	ACE2	chrX	15718122	T	C	b38	rs1849863	8.3e-06	0.38	Brain - Frontal Cortex (BA9)
ENSG00000130234.10	ACE2	chrX	15607860	T	G	b38	rs5934250	8.3e-06	0.25	Prostate
ENSG00000130234.10	ACE2	chrX	15624602	ATGGATTGTGTT	A	b38	rs66462812	8.3e-06	0.25	Prostate
ENSG00000130234.10	ACE2	chrX	15629578	A	G	b38	rs2106806	8.3e-06	0.25	Prostate
ENSG00000130234.10	ACE2	chrX	15570148	C	G	b38	rs4646174	8.4e-06	0.31	Brain - Caudate (basal ganglia)
ENSG00000130234.10	ACE2	chrX	15599613	G	A	b38	rs4646120	9.3e-06	0.37	Brain - Putamen (basal ganglia)
ENSG00000130234.10	ACE2	chrX	15688707	C	A	b38	rs4060	9.4e-06	0.3	Pituitary
ENSG00000130234.10	ACE2	chrX	15695950	G	A	b38	rs5936013	9.4e-06	0.3	Pituitary
ENSG00000130234.10	ACE2	chrX	15586742	G	A	b38	rs1514279	9.6e-06	0.39	Brain - Substantia nigra
ENSG00000130234.10	ACE2	chrX	15586742	G	A	b38	rs1514279	9.9e-06	0.33	Brain - Nucleus accumbens (basal ganglia)
ENSG00000130234.10	ACE2	chrX	15599613	G	A	b38	rs4646120	1e-05	0.31	Pituitary
ENSG00000130234.10	ACE2	chrX	15599613	G	A	b38	rs4646120	1e-05	0.31	Brain - Hypothalamus
ENSG00000130234.10	ACE2	chrX	15679923	C	T	b38	rs5936011	1e-05	0.25	Prostate
ENSG00000130234.10	ACE2	chrX	15682937	A	C	b38	rs4830983	1e-05	0.25	Prostate
ENSG00000130234.10	ACE2	chrX	15700755	A	G	b38	rs5936018	1e-05	0.25	Prostate
ENSG00000130234.10	ACE2	chrX	15705022	T	C	b38	rs5936019	1e-05	0.25	Prostate
ENSG00000130234.10	ACE2	chrX	15635613	C	T	b38	rs5934253	1.1e-05	0.44	Brain - Frontal Cortex (BA9)
ENSG00000130234.10	ACE2	chrX	15645642	C	G	b38	rs5936001	1.1e-05	0.44	Brain - Frontal Cortex (BA9)
ENSG00000130234.10	ACE2	chrX	15645735	A	C	b38	rs5936002	1.1e-05	0.44	Brain - Frontal Cortex (BA9)
ENSG00000130234.10	ACE2	chrX	15668176	C	A	b38	rs6632704	1.1e-05	0.4	Brain - Amygdala
ENSG00000130234.10	ACE2	chrX	15674766	C	G	b38	rs5936010	1.1e-05	0.4	Brain - Amygdala
ENSG00000130234.10	ACE2	chrX	15675734	C	T	b38	rs5934263	1.1e-05	0.4	Brain - Amygdala
ENSG00000130234.10	ACE2	chrX	15676365	C	T	b38	rs997300	1.1e-05	0.4	Brain - Amygdala
ENSG00000130234.10	ACE2	chrX	15682709	T	C	b38	rs4830981	1.1e-05	0.4	Brain - Amygdala
ENSG00000130234.10	ACE2	chrX	15683622	A	T	b38	rs4830985	1.1e-05	0.4	Brain - Amygdala
ENSG00000130234.10	ACE2	chrX	15689209	GGCTT	G	b38	rs34093185	1.1e-05	0.4	Brain - Amygdala
ENSG00000130234.10	ACE2	chrX	15691078	A	T	b38	rs6632713	1.1e-05	0.4	Brain - Amygdala
ENSG00000130234.10	ACE2	chrX	15691331	T	C	b38	rs6629119	1.1e-05	0.4	Brain - Amygdala
ENSG00000130234.10	ACE2	chrX	15693789	T	G	b38	rs7062378	1.1e-05	0.4	Brain - Amygdala
ENSG00000130234.10	ACE2	chrX	15698322	A	G	b38	rs5936015	1.1e-05	0.4	Brain - Amygdala
ENSG00000130234.10	ACE2	chrX	15705881	A	G	b38	rs5934268	1.1e-05	0.4	Brain - Amygdala
ENSG00000130234.10	ACE2	chrX	15706752	A	G	b38	rs5936020	1.1e-05	0.4	Brain - Amygdala
ENSG00000130234.10	ACE2	chrX	15709854	G	A	b38	rs5936023	1.1e-05	0.4	Brain - Amygdala
ENSG00000130234.10	ACE2	chrX	15712496	G	A	b38	rs1515008	1.1e-05	0.4	Brain - Amygdala
ENSG00000130234.10	ACE2	chrX	15713643	C	G	b38	rs2012671	1.1e-05	0.4	Brain - Amygdala
ENSG00000130234.10	ACE2	chrX	15715871	A	G	b38	rs5934269	1.1e-05	0.4	Brain - Amygdala
ENSG00000130234.10	ACE2	chrX	15572684	C	G	b38	rs879922	1.1e-05	0.3	Brain - Caudate (basal ganglia)
ENSG00000130234.10	ACE2	chrX	15578920	A	T	b38	rs4646156	1.1e-05	0.32	Brain - Hypothalamus
ENSG00000130234.10	ACE2	chrX	15594320	GA	G	b38	rs4646131	1.1e-05	0.32	Brain - Hypothalamus
ENSG00000130234.10	ACE2	chrX	15596022	G	A	b38	rs2023802	1.1e-05	0.32	Brain - Hypothalamus
ENSG00000130234.10	ACE2	chrX	15597330	A	G	b38	rs4646127	1.1e-05	0.32	Brain - Hypothalamus
ENSG00000130234.10	ACE2	chrX	15597980	C	CA	b38	rs34481900	1.1e-05	0.32	Brain - Hypothalamus
ENSG00000130234.10	ACE2	chrX	15598673	T	C	b38	rs4646124	1.1e-05	0.32	Brain - Hypothalamus
ENSG00000130234.10	ACE2	chrX	15635613	C	T	b38	rs5934253	1.2e-05	0.44	Brain - Amygdala
ENSG00000130234.10	ACE2	chrX	15645642	C	G	b38	rs5936001	1.2e-05	0.44	Brain - Amygdala
ENSG00000130234.10	ACE2	chrX	15645735	A	C	b38	rs5936002	1.2e-05	0.44	Brain - Amygdala
ENSG00000130234.10	ACE2	chrX	15639988	T	C	b38	rs990432	1.2e-05	0.39	Brain - Nucleus accumbens (basal ganglia)
ENSG00000130234.10	ACE2	chrX	15644812	T	C	b38	rs5936000	1.2e-05	0.39	Brain - Nucleus accumbens (basal ganglia)
ENSG00000130234.10	ACE2	chrX	15650009	C	G	b38	rs6629114	1.2e-05	0.39	Brain - Nucleus accumbens (basal ganglia)
ENSG00000130234.10	ACE2	chrX	15654681	T	C	b38	rs6632695	1.2e-05	0.39	Brain - Nucleus accumbens (basal ganglia)
ENSG00000130234.10	ACE2	chrX	15721189	C	T	b38	rs5936029	1.2e-05	0.38	Brain - Cerebellar Hemisphere
ENSG00000130234.10	ACE2	chrX	15723284	A	C	b38	rs4830547	1.2e-05	0.38	Brain - Cerebellar Hemisphere
ENSG00000130234.10	ACE2	chrX	15471259	A	G	b38	rs5980158	1.2e-05	0.16	Nerve - Tibial
ENSG00000130234.10	ACE2	chrX	15721189	C	T	b38	rs5936029	1.2e-05	0.39	Brain - Substantia nigra
ENSG00000130234.10	ACE2	chrX	15599940	T	C	b38	rs1978124	1.3e-05	0.24	Prostate
ENSG00000130234.10	ACE2	chrX	16005977	C	T	b38	rs5934294	1.3e-05	0.18	Nerve - Tibial
ENSG00000130234.10	ACE2	chrX	16011073	A	G	b38	rs5934295	1.3e-05	0.18	Nerve - Tibial
ENSG00000130234.10	ACE2	chrX	15977795	G	A	b38	rs705860	1.3e-05	-0.18	Nerve - Tibial
ENSG00000130234.10	ACE2	chrX	15981267	G	C	b38	rs705861	1.3e-05	-0.18	Nerve - Tibial
ENSG00000130234.10	ACE2	chrX	15626097	G	A	b38	rs2158082	1.3e-05	0.39	Brain - Substantia nigra
ENSG00000130234.10	ACE2	chrX	15655444	T	C	b38	rs4830971	1.3e-05	0.39	Brain - Substantia nigra
ENSG00000130234.10	ACE2	chrX	15655746	G	A	b38	rs4830972	1.3e-05	0.39	Brain - Substantia nigra
ENSG00000130234.10	ACE2	chrX	15731193	A	AT	b38	rs35593267	1.3e-05	-0.33	Brain - Caudate (basal ganglia)
ENSG00000130234.10	ACE2	chrX	15626097	G	A	b38	rs2158082	1.3e-05	0.24	Prostate
ENSG00000130234.10	ACE2	chrX	15643040	A	G	b38	rs5934254	1.3e-05	0.24	Prostate
ENSG00000130234.10	ACE2	chrX	15646921	C	G	b38	rs5934256	1.3e-05	0.24	Prostate
ENSG00000130234.10	ACE2	chrX	15654035	A	C	b38	rs5934257	1.3e-05	0.24	Prostate
ENSG00000130234.10	ACE2	chrX	15655180	C	T	b38	rs5934259	1.3e-05	0.24	Prostate
ENSG00000130234.10	ACE2	chrX	15655444	T	C	b38	rs4830971	1.3e-05	0.24	Prostate
ENSG00000130234.10	ACE2	chrX	15655746	G	A	b38	rs4830972	1.3e-05	0.24	Prostate
ENSG00000130234.10	ACE2	chrX	15645250	C	T	b38	rs3810721	1.3e-05	0.42	Brain - Frontal Cortex (BA9)
ENSG00000130234.10	ACE2	chrX	15646260	G	A	b38	rs6632688	1.3e-05	0.42	Brain - Frontal Cortex (BA9)
ENSG00000130234.10	ACE2	chrX	15648432	A	T	b38	rs6632690	1.3e-05	0.42	Brain - Frontal Cortex (BA9)
ENSG00000130234.10	ACE2	chrX	15648501	T	C	b38	rs6632691	1.3e-05	0.42	Brain - Frontal Cortex (BA9)
ENSG00000130234.10	ACE2	chrX	15651488	T	G	b38	rs6629115	1.3e-05	0.42	Brain - Frontal Cortex (BA9)
ENSG00000130234.10	ACE2	chrX	15651747	C	T	b38	rs6632693	1.3e-05	0.42	Brain - Frontal Cortex (BA9)
ENSG00000130234.10	ACE2	chrX	15584941	G	C	b38	rs4646142	1.3e-05	0.42	Brain - Frontal Cortex (BA9)
ENSG00000130234.10	ACE2	chrX	15599938	A	G	b38	rs2106809	1.4e-05	0.43	Brain - Cortex
ENSG00000130234.10	ACE2	chrX	15579712	C	T	b38	rs4646153	1.5e-05	0.38	Brain - Substantia nigra
ENSG00000130234.10	ACE2	chrX	15579901	A	G	b38	rs4646152	1.5e-05	0.38	Brain - Substantia nigra
ENSG00000130234.10	ACE2	chrX	15582092	A	C	b38	rs2048684	1.5e-05	0.38	Brain - Substantia nigra
ENSG00000130234.10	ACE2	chrX	15582568	C	T	b38	rs2316904	1.5e-05	0.38	Brain - Substantia nigra
ENSG00000130234.10	ACE2	chrX	15582621	T	A	b38	rs4646147	1.5e-05	0.38	Brain - Substantia nigra
ENSG00000130234.10	ACE2	chrX	15582756	C	CA	b38	rs773423496	1.5e-05	0.38	Brain - Substantia nigra
ENSG00000130234.10	ACE2	chrX	15583151	G	T	b38	rs2316903	1.5e-05	0.38	Brain - Substantia nigra
ENSG00000130234.10	ACE2	chrX	15592225	C	T	b38	rs2285666	1.5e-05	0.37	Brain - Hypothalamus
ENSG00000130234.10	ACE2	chrX	15635868	C	T	b38	rs6632684	1.5e-05	0.46	Brain - Frontal Cortex (BA9)
ENSG00000130234.10	ACE2	chrX	15654183	C	T	b38	rs5934258	1.5e-05	0.46	Brain - Frontal Cortex (BA9)
ENSG00000130234.10	ACE2	chrX	15999296	G	A	b38	rs5936091	1.6e-05	0.18	Nerve - Tibial
ENSG00000130234.10	ACE2	chrX	15757407	G	A	b38	rs12393271	1.6e-05	-0.34	Brain - Cortex
ENSG00000130234.10	ACE2	chrX	15469136	G	T	b38	rs1567893	1.6e-05	0.33	Brain - Caudate (basal ganglia)
ENSG00000130234.10	ACE2	chrX	15584941	G	C	b38	rs4646142	1.6e-05	0.37	Brain - Hypothalamus
ENSG00000130234.10	ACE2	chrX	15666122	C	A	b38	rs6629118	1.6e-05	0.45	Brain - Frontal Cortex (BA9)
ENSG00000130234.10	ACE2	chrX	15667060	AC	A	b38	rs56019589	1.6e-05	0.45	Brain - Frontal Cortex (BA9)
ENSG00000130234.10	ACE2	chrX	15667094	G	A	b38	rs5936008	1.6e-05	0.45	Brain - Frontal Cortex (BA9)
ENSG00000130234.10	ACE2	chrX	15667470	G	A	b38	rs111608093	1.6e-05	0.45	Brain - Frontal Cortex (BA9)
ENSG00000130234.10	ACE2	chrX	15667545	C	T	b38	rs73437956	1.6e-05	0.45	Brain - Frontal Cortex (BA9)
ENSG00000130234.10	ACE2	chrX	15671816	A	G	b38	rs5936009	1.6e-05	0.45	Brain - Frontal Cortex (BA9)
ENSG00000130234.10	ACE2	chrX	15681200	A	G	b38	rs2056086	1.6e-05	0.45	Brain - Frontal Cortex (BA9)
ENSG00000130234.10	ACE2	chrX	15685387	C	T	b38	rs5934265	1.6e-05	0.45	Brain - Frontal Cortex (BA9)
ENSG00000130234.10	ACE2	chrX	15689430	T	C	b38	rs6632711	1.6e-05	0.45	Brain - Frontal Cortex (BA9)
ENSG00000130234.10	ACE2	chrX	15692108	A	G	b38	rs5936012	1.6e-05	0.45	Brain - Frontal Cortex (BA9)
ENSG00000130234.10	ACE2	chrX	15693441	G	A	b38	rs6629120	1.6e-05	0.45	Brain - Frontal Cortex (BA9)
ENSG00000130234.10	ACE2	chrX	15696773	C	T	b38	rs5934266	1.6e-05	0.45	Brain - Frontal Cortex (BA9)
ENSG00000130234.10	ACE2	chrX	15715875	G	T	b38	rs5936025	1.6e-05	0.45	Brain - Frontal Cortex (BA9)
ENSG00000130234.10	ACE2	chrX	15718633	A	G	b38	rs6632722	1.6e-05	0.45	Brain - Frontal Cortex (BA9)
ENSG00000130234.10	ACE2	chrX	15544039	C	T	b38	rs233567	1.6e-05	0.41	Brain - Substantia nigra
ENSG00000130234.10	ACE2	chrX	15958987	C	G	b38	rs705856	1.6e-05	-0.37	Brain - Caudate (basal ganglia)
ENSG00000130234.10	ACE2	chrX	15492553	G	T	b38	rs6629105	1.6e-05	0.34	Brain - Nucleus accumbens (basal ganglia)
ENSG00000130234.10	ACE2	chrX	15592225	C	T	b38	rs2285666	1.6e-05	0.17	Nerve - Tibial
ENSG00000130234.10	ACE2	chrX	15639988	T	C	b38	rs990432	1.6e-05	0.43	Brain - Frontal Cortex (BA9)
ENSG00000130234.10	ACE2	chrX	15644812	T	C	b38	rs5936000	1.6e-05	0.43	Brain - Frontal Cortex (BA9)
ENSG00000130234.10	ACE2	chrX	15650009	C	G	b38	rs6629114	1.6e-05	0.43	Brain - Frontal Cortex (BA9)
ENSG00000130234.10	ACE2	chrX	15654681	T	C	b38	rs6632695	1.6e-05	0.43	Brain - Frontal Cortex (BA9)
ENSG00000130234.10	ACE2	chrX	15579712	C	T	b38	rs4646153	1.6e-05	0.33	Brain - Nucleus accumbens (basal ganglia)
ENSG00000130234.10	ACE2	chrX	15579901	A	G	b38	rs4646152	1.6e-05	0.33	Brain - Nucleus accumbens (basal ganglia)
ENSG00000130234.10	ACE2	chrX	15582092	A	C	b38	rs2048684	1.6e-05	0.33	Brain - Nucleus accumbens (basal ganglia)
ENSG00000130234.10	ACE2	chrX	15582568	C	T	b38	rs2316904	1.6e-05	0.33	Brain - Nucleus accumbens (basal ganglia)
ENSG00000130234.10	ACE2	chrX	15582621	T	A	b38	rs4646147	1.6e-05	0.33	Brain - Nucleus accumbens (basal ganglia)
ENSG00000130234.10	ACE2	chrX	15582756	C	CA	b38	rs773423496	1.6e-05	0.33	Brain - Nucleus accumbens (basal ganglia)
ENSG00000130234.10	ACE2	chrX	15583151	G	T	b38	rs2316903	1.6e-05	0.33	Brain - Nucleus accumbens (basal ganglia)
ENSG00000130234.10	ACE2	chrX	15558483	C	T	b38	rs4830542	1.7e-05	0.3	Brain - Caudate (basal ganglia)
ENSG00000130234.10	ACE2	chrX	15568841	C	T	b38	rs4240157	1.7e-05	0.3	Brain - Caudate (basal ganglia)
ENSG00000130234.10	ACE2	chrX	15675427	G	GGGCGCGGTCCTTACGTGT	b38	rs200781818	1.7e-05	0.31	Pituitary
ENSG00000130234.10	ACE2	chrX	15642742	C	T	b38	rs5935998	1.7e-05	0.36	Brain - Frontal Cortex (BA9)
ENSG00000130234.10	ACE2	chrX	15646263	G	A	b38	rs5934255	1.7e-05	0.36	Brain - Frontal Cortex (BA9)
ENSG00000130234.10	ACE2	chrX	15626097	G	A	b38	rs2158082	1.7e-05	0.41	Brain - Amygdala
ENSG00000130234.10	ACE2	chrX	15643040	A	G	b38	rs5934254	1.7e-05	0.41	Brain - Amygdala
ENSG00000130234.10	ACE2	chrX	15646921	C	G	b38	rs5934256	1.7e-05	0.41	Brain - Amygdala
ENSG00000130234.10	ACE2	chrX	15655180	C	T	b38	rs5934259	1.7e-05	0.41	Brain - Amygdala
ENSG00000130234.10	ACE2	chrX	15655444	T	C	b38	rs4830971	1.7e-05	0.41	Brain - Amygdala
ENSG00000130234.10	ACE2	chrX	15655746	G	A	b38	rs4830972	1.7e-05	0.41	Brain - Amygdala
ENSG00000130234.10	ACE2	chrX	15631440	T	TA	b38	rs35736648	1.7e-05	0.42	Brain - Cortex
ENSG00000130234.10	ACE2	chrX	15637334	A	G	b38	rs5935996	1.7e-05	0.42	Brain - Cortex
ENSG00000130234.10	ACE2	chrX	15640647	T	C	b38	rs41492646	1.7e-05	0.42	Brain - Cortex
ENSG00000130234.10	ACE2	chrX	15535259	C	G	b38	rs2214266	1.7e-05	0.3	Brain - Caudate (basal ganglia)
ENSG00000130234.10	ACE2	chrX	15535373	A	G	b38	rs963447	1.7e-05	0.3	Brain - Caudate (basal ganglia)
ENSG00000130234.10	ACE2	chrX	15535765	TGATA	T	b38	rs35972066	1.7e-05	0.3	Brain - Caudate (basal ganglia)
ENSG00000130234.10	ACE2	chrX	15654035	A	C	b38	rs5934257	1.7e-05	0.38	Brain - Substantia nigra
ENSG00000130234.10	ACE2	chrX	15645250	C	T	b38	rs3810721	1.8e-05	0.43	Brain - Amygdala
ENSG00000130234.10	ACE2	chrX	15646260	G	A	b38	rs6632688	1.8e-05	0.43	Brain - Amygdala
ENSG00000130234.10	ACE2	chrX	15648432	A	T	b38	rs6632690	1.8e-05	0.43	Brain - Amygdala
ENSG00000130234.10	ACE2	chrX	15648501	T	C	b38	rs6632691	1.8e-05	0.43	Brain - Amygdala
ENSG00000130234.10	ACE2	chrX	15651488	T	G	b38	rs6629115	1.8e-05	0.43	Brain - Amygdala
ENSG00000130234.10	ACE2	chrX	15651747	C	T	b38	rs6632693	1.8e-05	0.43	Brain - Amygdala
ENSG00000130234.10	ACE2	chrX	15630842	T	C	b38	rs12689012	1.8e-05	0.42	Brain - Frontal Cortex (BA9)
ENSG00000130234.10	ACE2	chrX	15631329	A	G	b38	rs1515009	1.8e-05	0.42	Brain - Frontal Cortex (BA9)
ENSG00000130234.10	ACE2	chrX	15632163	G	A	b38	rs6527618	1.8e-05	0.42	Brain - Frontal Cortex (BA9)
ENSG00000130234.10	ACE2	chrX	15633075	C	T	b38	rs6527619	1.8e-05	0.42	Brain - Frontal Cortex (BA9)
ENSG00000130234.10	ACE2	chrX	15633116	C	T	b38	rs6527620	1.8e-05	0.42	Brain - Frontal Cortex (BA9)
ENSG00000130234.10	ACE2	chrX	15633251	A	G	b38	rs6629111	1.8e-05	0.42	Brain - Frontal Cortex (BA9)
ENSG00000130234.10	ACE2	chrX	15638467	C	CA	b38	rs5901568	1.8e-05	0.42	Brain - Frontal Cortex (BA9)
ENSG00000130234.10	ACE2	chrX	15641760	C	T	b38	rs6632685	1.8e-05	0.42	Brain - Frontal Cortex (BA9)
ENSG00000130234.10	ACE2	chrX	15641844	T	C	b38	rs56137184	1.8e-05	0.42	Brain - Frontal Cortex (BA9)
ENSG00000130234.10	ACE2	chrX	15643094	C	T	b38	rs5935999	1.8e-05	0.42	Brain - Frontal Cortex (BA9)
ENSG00000130234.10	ACE2	chrX	15651136	T	C	b38	rs5936003	1.8e-05	0.42	Brain - Frontal Cortex (BA9)
ENSG00000130234.10	ACE2	chrX	15653227	T	G	b38	rs1877924	1.8e-05	0.42	Brain - Frontal Cortex (BA9)
ENSG00000130234.10	ACE2	chrX	15534441	T	C	b38	rs1877752	1.8e-05	0.3	Brain - Caudate (basal ganglia)
ENSG00000130234.10	ACE2	chrX	15534450	G	GA	b38	rs34879154	1.8e-05	0.3	Brain - Caudate (basal ganglia)
ENSG00000130234.10	ACE2	chrX	15534579	C	T	b38	rs1877753	1.8e-05	0.3	Brain - Caudate (basal ganglia)
ENSG00000130234.10	ACE2	chrX	15534633	A	G	b38	rs1399201	1.8e-05	0.3	Brain - Caudate (basal ganglia)
ENSG00000130234.10	ACE2	chrX	15661440	G	C	b38	rs5934261	1.8e-05	0.39	Brain - Amygdala
ENSG00000130234.10	ACE2	chrX	15663575	TAACA	T	b38	rs138992236	1.8e-05	0.39	Brain - Amygdala
ENSG00000130234.10	ACE2	chrX	15558483	C	T	b38	rs4830542	1.8e-05	0.37	Brain - Substantia nigra
ENSG00000130234.10	ACE2	chrX	15568841	C	T	b38	rs4240157	1.8e-05	0.37	Brain - Substantia nigra
ENSG00000130234.10	ACE2	chrX	15572684	C	G	b38	rs879922	1.8e-05	0.37	Brain - Substantia nigra
ENSG00000130234.10	ACE2	chrX	15643040	A	G	b38	rs5934254	1.8e-05	0.38	Brain - Substantia nigra
ENSG00000130234.10	ACE2	chrX	15646921	C	G	b38	rs5934256	1.8e-05	0.38	Brain - Substantia nigra
ENSG00000130234.10	ACE2	chrX	15655180	C	T	b38	rs5934259	1.8e-05	0.38	Brain - Substantia nigra
ENSG00000130234.10	ACE2	chrX	15599940	T	C	b38	rs1978124	1.9e-05	0.4	Brain - Amygdala
ENSG00000130234.10	ACE2	chrX	15522176	T	C	b38	rs1476524	1.9e-05	0.3	Brain - Caudate (basal ganglia)
ENSG00000130234.10	ACE2	chrX	15581769	T	TTTAA	b38	rs138373349	2e-05	0.29	Pituitary
ENSG00000130234.10	ACE2	chrX	15579712	C	T	b38	rs4646153	2e-05	0.3	Pituitary
ENSG00000130234.10	ACE2	chrX	15579901	A	G	b38	rs4646152	2e-05	0.3	Pituitary
ENSG00000130234.10	ACE2	chrX	15582092	A	C	b38	rs2048684	2e-05	0.3	Pituitary
ENSG00000130234.10	ACE2	chrX	15582568	C	T	b38	rs2316904	2e-05	0.3	Pituitary
ENSG00000130234.10	ACE2	chrX	15582621	T	A	b38	rs4646147	2e-05	0.3	Pituitary
ENSG00000130234.10	ACE2	chrX	15582756	C	CA	b38	rs773423496	2e-05	0.3	Pituitary
ENSG00000130234.10	ACE2	chrX	15583151	G	T	b38	rs2316903	2e-05	0.3	Pituitary
ENSG00000130234.10	ACE2	chrX	15570148	C	G	b38	rs4646174	2e-05	0.14	Nerve - Tibial
ENSG00000130234.10	ACE2	chrX	15471259	A	G	b38	rs5980158	2e-05	0.32	Brain - Caudate (basal ganglia)
ENSG00000130234.10	ACE2	chrX	15531829	T	TA	b38	rs35139170	2.2e-05	0.29	Brain - Caudate (basal ganglia)
ENSG00000130234.10	ACE2	chrX	15533163	G	A	b38	rs5935990	2.2e-05	0.29	Brain - Caudate (basal ganglia)
ENSG00000130234.10	ACE2	chrX	15533442	G	A	b38	rs4830541	2.2e-05	0.29	Brain - Caudate (basal ganglia)
ENSG00000130234.10	ACE2	chrX	15654035	A	C	b38	rs5934257	2.3e-05	0.4	Brain - Amygdala
ENSG00000130234.10	ACE2	chrX	15586742	G	A	b38	rs1514279	2.3e-05	0.17	Artery - Tibial
ENSG00000130234.10	ACE2	chrX	15761179	C	CT	b38	rs11398820	2.3e-05	-0.33	Brain - Cortex
ENSG00000130234.10	ACE2	chrX	15772210	A	G	b38	rs5980180	2.3e-05	-0.33	Brain - Cortex
ENSG00000130234.10	ACE2	chrX	15543378	C	T	b38	rs233576	2.3e-05	0.4	Brain - Substantia nigra
ENSG00000130234.10	ACE2	chrX	15510246	T	A	b38	rs979848	2.3e-05	0.39	Brain - Substantia nigra
ENSG00000130234.10	ACE2	chrX	15534056	T	G	b38	rs1399200	2.3e-05	0.39	Brain - Substantia nigra
ENSG00000130234.10	ACE2	chrX	15639988	T	C	b38	rs990432	2.3e-05	0.42	Brain - Amygdala
ENSG00000130234.10	ACE2	chrX	15644812	T	C	b38	rs5936000	2.3e-05	0.42	Brain - Amygdala
ENSG00000130234.10	ACE2	chrX	15650009	C	G	b38	rs6629114	2.3e-05	0.42	Brain - Amygdala
ENSG00000130234.10	ACE2	chrX	15654681	T	C	b38	rs6632695	2.3e-05	0.42	Brain - Amygdala
ENSG00000130234.10	ACE2	chrX	15543378	C	T	b38	rs233576	2.4e-05	0.33	Brain - Nucleus accumbens (basal ganglia)
ENSG00000130234.10	ACE2	chrX	15544039	C	T	b38	rs233567	2.4e-05	0.33	Brain - Nucleus accumbens (basal ganglia)
ENSG00000130234.10	ACE2	chrX	15599938	A	G	b38	rs2106809	2.4e-05	0.45	Brain - Amygdala
ENSG00000130234.10	ACE2	chrX	15589527	T	C	b38	rs971249	2.4e-05	0.31	Brain - Hypothalamus
ENSG00000130234.10	ACE2	chrX	15590263	C	T	b38	rs2158083	2.4e-05	0.31	Brain - Hypothalamus
ENSG00000130234.10	ACE2	chrX	15590376	T	G	b38	rs2048683	2.4e-05	0.31	Brain - Hypothalamus
ENSG00000130234.10	ACE2	chrX	15471883	T	C	b38	rs1533322	2.5e-05	0.3	Brain - Caudate (basal ganglia)
ENSG00000130234.10	ACE2	chrX	15631440	T	TA	b38	rs35736648	2.6e-05	0.45	Brain - Frontal Cortex (BA9)
ENSG00000130234.10	ACE2	chrX	15637334	A	G	b38	rs5935996	2.6e-05	0.45	Brain - Frontal Cortex (BA9)
ENSG00000130234.10	ACE2	chrX	15640647	T	C	b38	rs41492646	2.6e-05	0.45	Brain - Frontal Cortex (BA9)
ENSG00000130234.10	ACE2	chrX	15635868	C	T	b38	rs6632684	2.6e-05	0.45	Brain - Amygdala
ENSG00000130234.10	ACE2	chrX	15654183	C	T	b38	rs5934258	2.6e-05	0.45	Brain - Amygdala
ENSG00000130234.10	ACE2	chrX	15666122	C	A	b38	rs6629118	2.6e-05	0.44	Brain - Amygdala
ENSG00000130234.10	ACE2	chrX	15667060	AC	A	b38	rs56019589	2.6e-05	0.44	Brain - Amygdala
ENSG00000130234.10	ACE2	chrX	15667094	G	A	b38	rs5936008	2.6e-05	0.44	Brain - Amygdala
ENSG00000130234.10	ACE2	chrX	15667470	G	A	b38	rs111608093	2.6e-05	0.44	Brain - Amygdala
ENSG00000130234.10	ACE2	chrX	15667545	C	T	b38	rs73437956	2.6e-05	0.44	Brain - Amygdala
ENSG00000130234.10	ACE2	chrX	15671816	A	G	b38	rs5936009	2.6e-05	0.44	Brain - Amygdala
ENSG00000130234.10	ACE2	chrX	15681200	A	G	b38	rs2056086	2.6e-05	0.44	Brain - Amygdala
ENSG00000130234.10	ACE2	chrX	15685387	C	T	b38	rs5934265	2.6e-05	0.44	Brain - Amygdala
ENSG00000130234.10	ACE2	chrX	15689430	T	C	b38	rs6632711	2.6e-05	0.44	Brain - Amygdala
ENSG00000130234.10	ACE2	chrX	15692108	A	G	b38	rs5936012	2.6e-05	0.44	Brain - Amygdala
ENSG00000130234.10	ACE2	chrX	15693441	G	A	b38	rs6629120	2.6e-05	0.44	Brain - Amygdala
ENSG00000130234.10	ACE2	chrX	15696773	C	T	b38	rs5934266	2.6e-05	0.44	Brain - Amygdala
ENSG00000130234.10	ACE2	chrX	15715875	G	T	b38	rs5936025	2.6e-05	0.44	Brain - Amygdala
ENSG00000130234.10	ACE2	chrX	15718633	A	G	b38	rs6632722	2.6e-05	0.44	Brain - Amygdala
ENSG00000130234.10	ACE2	chrX	16013888	A	G	b38	rs969665	2.7e-05	0.17	Nerve - Tibial
ENSG00000130234.10	ACE2	chrX	14911253	G	A	b38	rs35164803	2.8e-05	-0.43	Nerve - Tibial
ENSG00000130234.10	ACE2	chrX	15515233	G	A	b38	rs1849701	2.8e-05	0.29	Brain - Caudate (basal ganglia)
ENSG00000130234.10	ACE2	chrX	15685402	A	G	b38	rs6632710	2.8e-05	0.22	Prostate
ENSG00000130234.10	ACE2	chrX	15630842	T	C	b38	rs12689012	2.9e-05	0.42	Brain - Amygdala
ENSG00000130234.10	ACE2	chrX	15631329	A	G	b38	rs1515009	2.9e-05	0.42	Brain - Amygdala
ENSG00000130234.10	ACE2	chrX	15632163	G	A	b38	rs6527618	2.9e-05	0.42	Brain - Amygdala
ENSG00000130234.10	ACE2	chrX	15633075	C	T	b38	rs6527619	2.9e-05	0.42	Brain - Amygdala
ENSG00000130234.10	ACE2	chrX	15633116	C	T	b38	rs6527620	2.9e-05	0.42	Brain - Amygdala
ENSG00000130234.10	ACE2	chrX	15633251	A	G	b38	rs6629111	2.9e-05	0.42	Brain - Amygdala
ENSG00000130234.10	ACE2	chrX	15638467	C	CA	b38	rs5901568	2.9e-05	0.42	Brain - Amygdala
ENSG00000130234.10	ACE2	chrX	15641760	C	T	b38	rs6632685	2.9e-05	0.42	Brain - Amygdala
ENSG00000130234.10	ACE2	chrX	15641844	T	C	b38	rs56137184	2.9e-05	0.42	Brain - Amygdala
ENSG00000130234.10	ACE2	chrX	15643094	C	T	b38	rs5935999	2.9e-05	0.42	Brain - Amygdala
ENSG00000130234.10	ACE2	chrX	15651136	T	C	b38	rs5936003	2.9e-05	0.42	Brain - Amygdala
ENSG00000130234.10	ACE2	chrX	15653227	T	G	b38	rs1877924	2.9e-05	0.42	Brain - Amygdala
ENSG00000130234.10	ACE2	chrX	15586742	G	A	b38	rs1514279	2.9e-05	0.3	Brain - Hypothalamus
ENSG00000130234.10	ACE2	chrX	15590829	C	T	b38	rs757066	2.9e-05	0.29	Pituitary
ENSG00000130234.10	ACE2	chrX	15578020	C	CATAAG	b38	rs113691336	3e-05	0.31	Brain - Hypothalamus
ENSG00000130234.10	ACE2	chrX	15581769	T	TTTAA	b38	rs138373349	3e-05	0.31	Brain - Hypothalamus
ENSG00000130234.10	ACE2	chrX	15596540	G	GT	b38	rs768560726	3e-05	0.31	Brain - Hypothalamus
ENSG00000130234.10	ACE2	chrX	15525037	A	G	b38	rs4830965	3e-05	0.15	Nerve - Tibial
ENSG00000130234.10	ACE2	chrX	15525038	A	G	b38	rs4830966	3e-05	0.15	Nerve - Tibial
ENSG00000130234.10	ACE2	chrX	15725522	C	G	b38	rs5934270	3e-05	0.44	Brain - Amygdala
ENSG00000130234.10	ACE2	chrX	15589527	T	C	b38	rs971249	3e-05	0.17	Artery - Tibial
ENSG00000130234.10	ACE2	chrX	15534056	T	G	b38	rs1399200	3.1e-05	0.15	Nerve - Tibial
ENSG00000130234.10	ACE2	chrX	15607860	T	G	b38	rs5934250	3.1e-05	0.4	Brain - Amygdala
ENSG00000130234.10	ACE2	chrX	15624602	ATGGATTGTGTT	A	b38	rs66462812	3.1e-05	0.4	Brain - Amygdala
ENSG00000130234.10	ACE2	chrX	15629578	A	G	b38	rs2106806	3.1e-05	0.4	Brain - Amygdala
ENSG00000130234.10	ACE2	chrX	15612712	A	C	b38	rs6632680	3.1e-05	0.34	Brain - Cerebellar Hemisphere
ENSG00000130234.10	ACE2	chrX	15597330	A	G	b38	rs4646127	3.1e-05	0.11	Adipose - Subcutaneous
ENSG00000130234.10	ACE2	chrX	15597980	C	CA	b38	rs34481900	3.1e-05	0.11	Adipose - Subcutaneous
ENSG00000130234.10	ACE2	chrX	15590376	T	G	b38	rs2048683	3.1e-05	0.16	Artery - Tibial
ENSG00000130234.10	ACE2	chrX	15612712	A	C	b38	rs6632680	3.2e-05	0.35	Brain - Substantia nigra
ENSG00000130234.10	ACE2	chrX	15612712	A	C	b38	rs6632680	3.2e-05	0.38	Brain - Amygdala
ENSG00000130234.10	ACE2	chrX	15557256	A	C	b38	rs1132186	3.2e-05	0.28	Brain - Caudate (basal ganglia)
ENSG00000130234.10	ACE2	chrX	15592225	C	T	b38	rs2285666	3.2e-05	0.41	Brain - Frontal Cortex (BA9)
ENSG00000130234.10	ACE2	chrX	14742270	C	T	b38	rs75979613	3.3e-05	-0.44	Breast - Mammary Tissue
ENSG00000130234.10	ACE2	chrX	15639988	T	C	b38	rs990432	3.3e-05	0.39	Brain - Cortex
ENSG00000130234.10	ACE2	chrX	15644812	T	C	b38	rs5936000	3.3e-05	0.39	Brain - Cortex
ENSG00000130234.10	ACE2	chrX	15650009	C	G	b38	rs6629114	3.3e-05	0.39	Brain - Cortex
ENSG00000130234.10	ACE2	chrX	15654681	T	C	b38	rs6632695	3.3e-05	0.39	Brain - Cortex
ENSG00000130234.10	ACE2	chrX	15448044	A	G	b38	rs432654	3.3e-05	0.22	Nerve - Tibial
ENSG00000130234.10	ACE2	chrX	15578020	C	CATAAG	b38	rs113691336	3.4e-05	0.29	Pituitary
ENSG00000130234.10	ACE2	chrX	15596540	G	GT	b38	rs768560726	3.4e-05	0.29	Pituitary
ENSG00000130234.10	ACE2	chrX	15471883	T	C	b38	rs1533322	3.4e-05	0.14	Nerve - Tibial
ENSG00000130234.10	ACE2	chrX	15578920	A	T	b38	rs4646156	3.4e-05	0.1	Adipose - Subcutaneous
ENSG00000130234.10	ACE2	chrX	15594320	GA	G	b38	rs4646131	3.4e-05	0.1	Adipose - Subcutaneous
ENSG00000130234.10	ACE2	chrX	15596022	G	A	b38	rs2023802	3.4e-05	0.1	Adipose - Subcutaneous
ENSG00000130234.10	ACE2	chrX	15598673	T	C	b38	rs4646124	3.4e-05	0.1	Adipose - Subcutaneous
ENSG00000130234.10	ACE2	chrX	15599613	G	A	b38	rs4646120	3.4e-05	0.23	Prostate
ENSG00000130234.10	ACE2	chrX	15718122	T	C	b38	rs1849863	3.5e-05	0.14	Nerve - Tibial
ENSG00000130234.10	ACE2	chrX	15510246	T	A	b38	rs979848	3.6e-05	0.15	Nerve - Tibial
ENSG00000130234.10	ACE2	chrX	15666122	C	A	b38	rs6629118	3.6e-05	0.36	Brain - Caudate (basal ganglia)
ENSG00000130234.10	ACE2	chrX	15667060	AC	A	b38	rs56019589	3.6e-05	0.36	Brain - Caudate (basal ganglia)
ENSG00000130234.10	ACE2	chrX	15667094	G	A	b38	rs5936008	3.6e-05	0.36	Brain - Caudate (basal ganglia)
ENSG00000130234.10	ACE2	chrX	15667470	G	A	b38	rs111608093	3.6e-05	0.36	Brain - Caudate (basal ganglia)
ENSG00000130234.10	ACE2	chrX	15667545	C	T	b38	rs73437956	3.6e-05	0.36	Brain - Caudate (basal ganglia)
ENSG00000130234.10	ACE2	chrX	15671816	A	G	b38	rs5936009	3.6e-05	0.36	Brain - Caudate (basal ganglia)
ENSG00000130234.10	ACE2	chrX	15681200	A	G	b38	rs2056086	3.6e-05	0.36	Brain - Caudate (basal ganglia)
ENSG00000130234.10	ACE2	chrX	15685387	C	T	b38	rs5934265	3.6e-05	0.36	Brain - Caudate (basal ganglia)
ENSG00000130234.10	ACE2	chrX	15689430	T	C	b38	rs6632711	3.6e-05	0.36	Brain - Caudate (basal ganglia)
ENSG00000130234.10	ACE2	chrX	15692108	A	G	b38	rs5936012	3.6e-05	0.36	Brain - Caudate (basal ganglia)
ENSG00000130234.10	ACE2	chrX	15693441	G	A	b38	rs6629120	3.6e-05	0.36	Brain - Caudate (basal ganglia)
ENSG00000130234.10	ACE2	chrX	15696773	C	T	b38	rs5934266	3.6e-05	0.36	Brain - Caudate (basal ganglia)
ENSG00000130234.10	ACE2	chrX	15715875	G	T	b38	rs5936025	3.6e-05	0.36	Brain - Caudate (basal ganglia)
ENSG00000130234.10	ACE2	chrX	15718633	A	G	b38	rs6632722	3.6e-05	0.36	Brain - Caudate (basal ganglia)
ENSG00000130234.10	ACE2	chrX	15477636	T	C	b38	rs62578874	3.6e-05	0.32	Brain - Nucleus accumbens (basal ganglia)
ENSG00000130234.10	ACE2	chrX	15584941	G	C	b38	rs4646142	3.7e-05	0.38	Brain - Cortex
ENSG00000130234.10	ACE2	chrX	15592225	C	T	b38	rs2285666	3.7e-05	0.38	Brain - Cortex
ENSG00000130234.10	ACE2	chrX	15618418	C	T	b38	rs12007623	3.7e-05	0.34	Brain - Frontal Cortex (BA9)
ENSG00000130234.10	ACE2	chrX	15621438	T	G	b38	rs1548474	3.7e-05	0.34	Brain - Frontal Cortex (BA9)
ENSG00000130234.10	ACE2	chrX	15624289	G	C	b38	rs1356037	3.7e-05	0.34	Brain - Frontal Cortex (BA9)
ENSG00000130234.10	ACE2	chrX	15656962	T	C	b38	rs4830973	3.8e-05	0.14	Nerve - Tibial
ENSG00000130234.10	ACE2	chrX	15656998	C	A	b38	rs4830543	3.8e-05	0.14	Nerve - Tibial
ENSG00000130234.10	ACE2	chrX	15656962	T	C	b38	rs4830973	3.8e-05	0.16	Artery - Tibial
ENSG00000130234.10	ACE2	chrX	15656998	C	A	b38	rs4830543	3.8e-05	0.16	Artery - Tibial
ENSG00000130234.10	ACE2	chrX	15586742	G	A	b38	rs1514279	3.9e-05	0.29	Pituitary
ENSG00000130234.10	ACE2	chrX	15708323	C	T	b38	rs5936022	4e-05	0.14	Nerve - Tibial
ENSG00000130234.10	ACE2	chrX	15688395	G	C	b38	rs4830986	4e-05	0.35	Brain - Cortex
ENSG00000130234.10	ACE2	chrX	15532706	T	G	b38	rs112171234	4.1e-05	-0.85	Adipose - Visceral (Omentum)
ENSG00000130234.10	ACE2	chrX	15578020	C	CATAAG	b38	rs113691336	4.1e-05	0.11	Adipose - Subcutaneous
ENSG00000130234.10	ACE2	chrX	15596540	G	GT	b38	rs768560726	4.1e-05	0.11	Adipose - Subcutaneous
ENSG00000130234.10	ACE2	chrX	15578920	A	T	b38	rs4646156	4.2e-05	0.16	Artery - Tibial
ENSG00000130234.10	ACE2	chrX	15596022	G	A	b38	rs2023802	4.2e-05	0.16	Artery - Tibial
ENSG00000130234.10	ACE2	chrX	15598673	T	C	b38	rs4646124	4.2e-05	0.16	Artery - Tibial
ENSG00000130234.10	ACE2	chrX	15480924	A	C	b38	rs6629103	4.2e-05	0.32	Brain - Nucleus accumbens (basal ganglia)
ENSG00000130234.10	ACE2	chrX	15722117	C	T	b38	rs12558179	4.2e-05	0.15	Artery - Tibial
ENSG00000130234.10	ACE2	chrX	15656962	T	C	b38	rs4830973	4.3e-05	0.38	Brain - Anterior cingulate cortex (BA24)
ENSG00000130234.10	ACE2	chrX	15656998	C	A	b38	rs4830543	4.3e-05	0.38	Brain - Anterior cingulate cortex (BA24)
ENSG00000130234.10	ACE2	chrX	15682995	C	T	b38	rs4830984	4.3e-05	0.38	Brain - Anterior cingulate cortex (BA24)
ENSG00000130234.10	ACE2	chrX	15688395	G	C	b38	rs4830986	4.3e-05	0.38	Brain - Anterior cingulate cortex (BA24)
ENSG00000130234.10	ACE2	chrX	15708323	C	T	b38	rs5936022	4.3e-05	0.38	Brain - Anterior cingulate cortex (BA24)
ENSG00000130234.10	ACE2	chrX	15718122	T	C	b38	rs1849863	4.3e-05	0.38	Brain - Anterior cingulate cortex (BA24)
ENSG00000130234.10	ACE2	chrX	15594320	GA	G	b38	rs4646131	4.3e-05	0.16	Artery - Tibial
ENSG00000130234.10	ACE2	chrX	15478149	C	T	b38	rs1983286	4.4e-05	0.35	Brain - Cortex
ENSG00000130234.10	ACE2	chrX	15486947	T	C	b38	rs4830961	4.4e-05	0.35	Brain - Cortex
ENSG00000130234.10	ACE2	chrX	15625554	GA	G	b38	rs56369428	4.6e-05	0.38	Brain - Amygdala
ENSG00000130234.10	ACE2	chrX	15568325	A	G	b38	rs1514280	4.6e-05	0.14	Nerve - Tibial
ENSG00000130234.10	ACE2	chrX	15722117	C	T	b38	rs12558179	4.6e-05	0.36	Brain - Frontal Cortex (BA9)
ENSG00000130234.10	ACE2	chrX	15849804	CCTT	C	b38	rs199871378	4.6e-05	-0.36	Brain - Cortex
ENSG00000130234.10	ACE2	chrX	15731193	A	AT	b38	rs35593267	4.7e-05	-0.35	Brain - Frontal Cortex (BA9)
ENSG00000130234.10	ACE2	chrX	15626097	G	A	b38	rs2158082	4.8e-05	0.35	Brain - Cerebellar Hemisphere
ENSG00000130234.10	ACE2	chrX	15643040	A	G	b38	rs5934254	4.8e-05	0.35	Brain - Cerebellar Hemisphere
ENSG00000130234.10	ACE2	chrX	15646921	C	G	b38	rs5934256	4.8e-05	0.35	Brain - Cerebellar Hemisphere
ENSG00000130234.10	ACE2	chrX	15655180	C	T	b38	rs5934259	4.8e-05	0.35	Brain - Cerebellar Hemisphere
ENSG00000130234.10	ACE2	chrX	15655444	T	C	b38	rs4830971	4.8e-05	0.35	Brain - Cerebellar Hemisphere
ENSG00000130234.10	ACE2	chrX	15655746	G	A	b38	rs4830972	4.8e-05	0.35	Brain - Cerebellar Hemisphere
ENSG00000130234.10	ACE2	chrX	15656962	T	C	b38	rs4830973	4.8e-05	0.35	Brain - Cortex
ENSG00000130234.10	ACE2	chrX	15656998	C	A	b38	rs4830543	4.8e-05	0.35	Brain - Cortex
ENSG00000130234.10	ACE2	chrX	15682995	C	T	b38	rs4830984	4.8e-05	0.35	Brain - Cortex
ENSG00000130234.10	ACE2	chrX	15708323	C	T	b38	rs5936022	4.8e-05	0.35	Brain - Cortex
ENSG00000130234.10	ACE2	chrX	15718122	T	C	b38	rs1849863	4.8e-05	0.35	Brain - Cortex
ENSG00000130234.10	ACE2	chrX	15725522	C	G	b38	rs5934270	4.8e-05	0.42	Brain - Frontal Cortex (BA9)
ENSG00000130234.10	ACE2	chrX	15625554	GA	G	b38	rs56369428	4.8e-05	0.33	Brain - Cerebellar Hemisphere
ENSG00000130234.10	ACE2	chrX	15584941	G	C	b38	rs4646142	4.9e-05	0.16	Nerve - Tibial
ENSG00000130234.10	ACE2	chrX	15510246	T	A	b38	rs979848	4.9e-05	0.34	Brain - Anterior cingulate cortex (BA24)
ENSG00000130234.10	ACE2	chrX	15730102	C	T	b38	rs17216737	5e-05	0.43	Brain - Cortex
ENSG00000130234.10	ACE2	chrX	15738704	T	C	b38	rs112897625	5e-05	0.43	Brain - Cortex
ENSG00000130234.10	ACE2	chrX	15555645	A	C	b38	rs2873356	5e-05	0.29	Brain - Caudate (basal ganglia)
ENSG00000130234.10	ACE2	chrX	15675734	C	T	b38	rs5934263	5.1e-05	0.21	Prostate
ENSG00000130234.10	ACE2	chrX	15607860	T	G	b38	rs5934250	5.1e-05	0.35	Brain - Cerebellar Hemisphere
ENSG00000130234.10	ACE2	chrX	15624602	ATGGATTGTGTT	A	b38	rs66462812	5.1e-05	0.35	Brain - Cerebellar Hemisphere
ENSG00000130234.10	ACE2	chrX	15629578	A	G	b38	rs2106806	5.1e-05	0.35	Brain - Cerebellar Hemisphere
ENSG00000130234.10	ACE2	chrX	15582568	C	T	b38	rs2316904	5.2e-05	0.16	Artery - Tibial
ENSG00000130234.10	ACE2	chrX	15582621	T	A	b38	rs4646147	5.2e-05	0.16	Artery - Tibial
ENSG00000130234.10	ACE2	chrX	15582756	C	CA	b38	rs773423496	5.2e-05	0.16	Artery - Tibial
ENSG00000130234.10	ACE2	chrX	15583151	G	T	b38	rs2316903	5.2e-05	0.16	Artery - Tibial
ENSG00000130234.10	ACE2	chrX	15581769	T	TTTAA	b38	rs138373349	5.2e-05	0.1	Adipose - Subcutaneous
ENSG00000130234.10	ACE2	chrX	15625156	T	C	b38	rs6629110	5.4e-05	0.33	Brain - Cerebellar Hemisphere
ENSG00000130234.10	ACE2	chrX	15625378	C	T	b38	rs151215720	5.5e-05	0.2	Nerve - Tibial
ENSG00000130234.10	ACE2	chrX	15631190	C	A	b38	rs144629119	5.5e-05	0.2	Nerve - Tibial
ENSG00000130234.10	ACE2	chrX	15632212	G	C	b38	rs147214574	5.5e-05	0.2	Nerve - Tibial
ENSG00000130234.10	ACE2	chrX	15764327	C	T	b38	rs12393081	5.6e-05	-0.31	Brain - Cortex
ENSG00000130234.10	ACE2	chrX	15525037	A	G	b38	rs4830965	5.6e-05	0.34	Brain - Anterior cingulate cortex (BA24)
ENSG00000130234.10	ACE2	chrX	15525038	A	G	b38	rs4830966	5.6e-05	0.34	Brain - Anterior cingulate cortex (BA24)
ENSG00000130234.10	ACE2	chrX	15589527	T	C	b38	rs971249	5.6e-05	0.28	Pituitary
ENSG00000130234.10	ACE2	chrX	15590263	C	T	b38	rs2158083	5.6e-05	0.28	Pituitary
ENSG00000130234.10	ACE2	chrX	15590376	T	G	b38	rs2048683	5.6e-05	0.28	Pituitary
ENSG00000130234.10	ACE2	chrX	15755357	A	G	b38	rs62578955	5.7e-05	-0.31	Brain - Cortex
ENSG00000130234.10	ACE2	chrX	15755820	G	A	b38	rs5980177	5.7e-05	-0.31	Brain - Cortex
ENSG00000130234.10	ACE2	chrX	15762129	G	A	b38	rs5980179	5.7e-05	-0.31	Brain - Cortex
ENSG00000130234.10	ACE2	chrX	15767810	G	A	b38	rs11796442	5.7e-05	-0.31	Brain - Cortex
ENSG00000130234.10	ACE2	chrX	15612712	A	C	b38	rs6632680	5.8e-05	0.21	Prostate
ENSG00000130234.10	ACE2	chrX	15592225	C	T	b38	rs2285666	5.9e-05	0.33	Brain - Caudate (basal ganglia)
ENSG00000130234.10	ACE2	chrX	15484239	T	C	b38	rs4830956	5.9e-05	0.34	Brain - Cortex
ENSG00000130234.10	ACE2	chrX	15737797	GTGTT	G	b38	rs35251171	6e-05	-0.34	Brain - Frontal Cortex (BA9)
ENSG00000130234.10	ACE2	chrX	15995529	A	G	b38	rs797893	6.3e-05	-0.16	Nerve - Tibial
ENSG00000130234.10	ACE2	chrX	15546343	C	T	b38	rs233568	6.3e-05	0.31	Brain - Nucleus accumbens (basal ganglia)
ENSG00000130234.10	ACE2	chrX	15546631	C	T	b38	rs233569	6.3e-05	0.31	Brain - Nucleus accumbens (basal ganglia)
ENSG00000130234.10	ACE2	chrX	15515233	G	A	b38	rs1849701	6.3e-05	0.33	Brain - Anterior cingulate cortex (BA24)
ENSG00000130234.10	ACE2	chrX	15522176	T	C	b38	rs1476524	6.3e-05	0.33	Brain - Anterior cingulate cortex (BA24)
ENSG00000130234.10	ACE2	chrX	15578920	A	T	b38	rs4646156	6.3e-05	0.28	Pituitary
ENSG00000130234.10	ACE2	chrX	15594320	GA	G	b38	rs4646131	6.3e-05	0.28	Pituitary
ENSG00000130234.10	ACE2	chrX	15596022	G	A	b38	rs2023802	6.3e-05	0.28	Pituitary
ENSG00000130234.10	ACE2	chrX	15597330	A	G	b38	rs4646127	6.3e-05	0.28	Pituitary
ENSG00000130234.10	ACE2	chrX	15597980	C	CA	b38	rs34481900	6.3e-05	0.28	Pituitary
ENSG00000130234.10	ACE2	chrX	15598673	T	C	b38	rs4646124	6.3e-05	0.28	Pituitary
ENSG00000130234.10	ACE2	chrX	15590829	C	T	b38	rs757066	6.4e-05	0.3	Brain - Hypothalamus
ENSG00000130234.10	ACE2	chrX	15657187	T	C	b38	rs6632698	6.5e-05	0.35	Brain - Hypothalamus
ENSG00000130234.10	ACE2	chrX	15857288	A	T	b38	rs1858558	6.5e-05	0.2	Nerve - Tibial
ENSG00000130234.10	ACE2	chrX	15535259	C	G	b38	rs2214266	6.6e-05	0.29	Brain - Nucleus accumbens (basal ganglia)
ENSG00000130234.10	ACE2	chrX	15535373	A	G	b38	rs963447	6.6e-05	0.29	Brain - Nucleus accumbens (basal ganglia)
ENSG00000130234.10	ACE2	chrX	15535765	TGATA	T	b38	rs35972066	6.6e-05	0.29	Brain - Nucleus accumbens (basal ganglia)
ENSG00000130234.10	ACE2	chrX	15486413	G	C	b38	rs4830957	6.6e-05	0.34	Brain - Cortex
ENSG00000130234.10	ACE2	chrX	15486649	C	G	b38	rs4830959	6.6e-05	0.34	Brain - Cortex
ENSG00000130234.10	ACE2	chrX	15486650	A	C	b38	rs4830960	6.6e-05	0.34	Brain - Cortex
ENSG00000130234.10	ACE2	chrX	15708323	C	T	b38	rs5936022	6.8e-05	0.15	Artery - Tibial
ENSG00000130234.10	ACE2	chrX	15491712	T	C	b38	rs6629104	6.9e-05	0.32	Brain - Nucleus accumbens (basal ganglia)
ENSG00000130234.10	ACE2	chrX	15611318	T	C	b38	rs2097723	6.9e-05	0.36	Brain - Frontal Cortex (BA9)
ENSG00000130234.10	ACE2	chrX	15629209	T	C	b38	rs17264937	6.9e-05	0.36	Brain - Frontal Cortex (BA9)
ENSG00000130234.10	ACE2	chrX	15572684	C	G	b38	rs879922	7e-05	0.13	Nerve - Tibial
ENSG00000130234.10	ACE2	chrX	15702622	G	A	b38	rs56002876	7e-05	0.41	Brain - Hypothalamus
ENSG00000130234.10	ACE2	chrX	15716172	T	C	b38	rs112504565	7e-05	0.41	Brain - Hypothalamus
ENSG00000130234.10	ACE2	chrX	15776404	G	A	b38	rs5980182	7e-05	-0.31	Brain - Cortex
ENSG00000130234.10	ACE2	chrX	15570148	C	G	b38	rs4646174	7e-05	0.29	Brain - Nucleus accumbens (basal ganglia)
ENSG00000130234.10	ACE2	chrX	15557256	A	C	b38	rs1132186	7.2e-05	0.29	Brain - Nucleus accumbens (basal ganglia)
ENSG00000130234.10	ACE2	chrX	15590263	C	T	b38	rs2158083	7.3e-05	0.16	Artery - Tibial
ENSG00000130234.10	ACE2	chrX	15544039	C	T	b38	rs233567	7.4e-05	0.14	Nerve - Tibial
ENSG00000130234.10	ACE2	chrX	15725522	C	G	b38	rs5934270	7.5e-05	0.38	Brain - Cortex
ENSG00000130234.10	ACE2	chrX	15658294	G	A	b38	rs4830974	7.6e-05	0.21	Prostate
ENSG00000130234.10	ACE2	chrX	15660010	C	T	b38	rs5934260	7.6e-05	0.21	Prostate
ENSG00000130234.10	ACE2	chrX	15660059	G	A	b38	rs4830975	7.6e-05	0.21	Prostate
ENSG00000130234.10	ACE2	chrX	15662833	C	A	b38	rs5936006	7.6e-05	0.21	Prostate
ENSG00000130234.10	ACE2	chrX	15663053	A	T	b38	rs6632702	7.6e-05	0.21	Prostate
ENSG00000130234.10	ACE2	chrX	15663897	G	T	b38	rs5978732	7.6e-05	0.21	Prostate
ENSG00000130234.10	ACE2	chrX	15666611	A	G	b38	rs5936007	7.6e-05	0.21	Prostate
ENSG00000130234.10	ACE2	chrX	15667361	C	A	b38	rs4830976	7.6e-05	0.21	Prostate
ENSG00000130234.10	ACE2	chrX	15667422	C	G	b38	rs4830544	7.6e-05	0.21	Prostate
ENSG00000130234.10	ACE2	chrX	15667464	C	T	b38	rs4830545	7.6e-05	0.21	Prostate
ENSG00000130234.10	ACE2	chrX	15671586	G	C	b38	rs1533363	7.6e-05	0.21	Prostate
ENSG00000130234.10	ACE2	chrX	15673559	C	A	b38	rs1554087	7.6e-05	0.21	Prostate
ENSG00000130234.10	ACE2	chrX	15673898	T	A	b38	rs5934262	7.6e-05	0.21	Prostate
ENSG00000130234.10	ACE2	chrX	15674316	A	C	b38	rs4830977	7.6e-05	0.21	Prostate
ENSG00000130234.10	ACE2	chrX	15674699	T	C	b38	rs4830978	7.6e-05	0.21	Prostate
ENSG00000130234.10	ACE2	chrX	15675244	A	G	b38	rs4830979	7.6e-05	0.21	Prostate
ENSG00000130234.10	ACE2	chrX	15675338	T	A	b38	rs4830980	7.6e-05	0.21	Prostate
ENSG00000130234.10	ACE2	chrX	15676066	A	C	b38	rs997294	7.6e-05	0.21	Prostate
ENSG00000130234.10	ACE2	chrX	15676490	T	C	b38	rs7065227	7.6e-05	0.21	Prostate
ENSG00000130234.10	ACE2	chrX	15676654	A	G	b38	rs10521649	7.6e-05	0.21	Prostate
ENSG00000130234.10	ACE2	chrX	15682840	G	A	b38	rs4830982	7.6e-05	0.21	Prostate
ENSG00000130234.10	ACE2	chrX	15688707	C	A	b38	rs4060	7.6e-05	0.21	Prostate
ENSG00000130234.10	ACE2	chrX	15690021	G	A	b38	rs6527627	7.6e-05	0.21	Prostate
ENSG00000130234.10	ACE2	chrX	15693086	C	T	b38	rs1996225	7.6e-05	0.21	Prostate
ENSG00000130234.10	ACE2	chrX	15694830	G	A	b38	rs4830987	7.6e-05	0.21	Prostate
ENSG00000130234.10	ACE2	chrX	15695950	G	A	b38	rs5936013	7.6e-05	0.21	Prostate
ENSG00000130234.10	ACE2	chrX	15698680	A	T	b38	rs5936016	7.6e-05	0.21	Prostate
ENSG00000130234.10	ACE2	chrX	15698764	T	C	b38	rs5936017	7.6e-05	0.21	Prostate
ENSG00000130234.10	ACE2	chrX	15702202	A	G	b38	rs1877923	7.6e-05	0.21	Prostate
ENSG00000130234.10	ACE2	chrX	15702557	CTG	C	b38	rs35373086	7.6e-05	0.21	Prostate
ENSG00000130234.10	ACE2	chrX	15702600	C	T	b38	rs5934267	7.6e-05	0.21	Prostate
ENSG00000130234.10	ACE2	chrX	15707807	G	T	b38	rs2873135	7.6e-05	0.21	Prostate
ENSG00000130234.10	ACE2	chrX	15708300	C	T	b38	rs5936021	7.6e-05	0.21	Prostate
ENSG00000130234.10	ACE2	chrX	15709365	G	C	b38	rs4830546	7.6e-05	0.21	Prostate
ENSG00000130234.10	ACE2	chrX	15713217	T	C	b38	rs6527633	7.6e-05	0.21	Prostate
ENSG00000130234.10	ACE2	chrX	15713432	G	A	b38	rs1811781	7.6e-05	0.21	Prostate
ENSG00000130234.10	ACE2	chrX	15713496	G	T	b38	rs2012660	7.6e-05	0.21	Prostate
ENSG00000130234.10	ACE2	chrX	15715881	C	T	b38	rs5936026	7.6e-05	0.21	Prostate
ENSG00000130234.10	ACE2	chrX	15718136	C	G	b38	rs1849864	7.6e-05	0.21	Prostate
ENSG00000130234.10	ACE2	chrX	15537764	C	T	b38	rs5935991	7.6e-05	0.13	Nerve - Tibial
ENSG00000130234.10	ACE2	chrX	15535373	A	G	b38	rs963447	7.8e-05	0.13	Nerve - Tibial
ENSG00000130234.10	ACE2	chrX	15745845	AT	A	b38	rs66671051	8.2e-05	-0.3	Brain - Nucleus accumbens (basal ganglia)
ENSG00000130234.10	ACE2	chrX	15746324	C	T	b38	rs56127019	8.2e-05	-0.3	Brain - Nucleus accumbens (basal ganglia)
ENSG00000130234.10	ACE2	chrX	15543378	C	T	b38	rs233576	8.3e-05	0.14	Nerve - Tibial
ENSG00000130234.10	ACE2	chrX	15484882	T	C	b38	rs2316994	8.3e-05	0.32	Brain - Nucleus accumbens (basal ganglia)
ENSG00000130234.10	ACE2	chrX	15583220	A	G	b38	rs4646188	8.5e-05	0.18	Nerve - Tibial
ENSG00000130234.10	ACE2	chrX	15477687	G	A	b38	rs62578875	8.7e-05	0.31	Brain - Nucleus accumbens (basal ganglia)
ENSG00000130234.10	ACE2	chrX	15731193	A	AT	b38	rs35593267	8.8e-05	-0.28	Pituitary
ENSG00000130234.10	ACE2	chrX	15558292	GT	G	b38	rs35482260	8.8e-05	0.29	Brain - Nucleus accumbens (basal ganglia)
ENSG00000130234.10	ACE2	chrX	15645250	C	T	b38	rs3810721	8.8e-05	0.33	Brain - Caudate (basal ganglia)
ENSG00000130234.10	ACE2	chrX	15646260	G	A	b38	rs6632688	8.8e-05	0.33	Brain - Caudate (basal ganglia)
ENSG00000130234.10	ACE2	chrX	15648432	A	T	b38	rs6632690	8.8e-05	0.33	Brain - Caudate (basal ganglia)
ENSG00000130234.10	ACE2	chrX	15648501	T	C	b38	rs6632691	8.8e-05	0.33	Brain - Caudate (basal ganglia)
ENSG00000130234.10	ACE2	chrX	15651488	T	G	b38	rs6629115	8.8e-05	0.33	Brain - Caudate (basal ganglia)
ENSG00000130234.10	ACE2	chrX	15651747	C	T	b38	rs6632693	8.8e-05	0.33	Brain - Caudate (basal ganglia)
ENSG00000130234.10	ACE2	chrX	15484882	T	C	b38	rs2316994	8.8e-05	0.33	Brain - Cortex
ENSG00000130234.10	ACE2	chrX	15618418	C	T	b38	rs12007623	8.9e-05	0.34	Brain - Cortex
ENSG00000130234.10	ACE2	chrX	15621438	T	G	b38	rs1548474	8.9e-05	0.34	Brain - Cortex
ENSG00000130234.10	ACE2	chrX	15624289	G	C	b38	rs1356037	8.9e-05	0.34	Brain - Cortex
ENSG00000130234.10	ACE2	chrX	15642742	C	T	b38	rs5935998	8.9e-05	0.34	Brain - Cortex
ENSG00000130234.10	ACE2	chrX	15646263	G	A	b38	rs5934255	8.9e-05	0.34	Brain - Cortex
ENSG00000130234.10	ACE2	chrX	15597330	A	G	b38	rs4646127	8.9e-05	0.16	Artery - Tibial
ENSG00000130234.10	ACE2	chrX	15597980	C	CA	b38	rs34481900	8.9e-05	0.16	Artery - Tibial
ENSG00000130234.10	ACE2	chrX	15543378	C	T	b38	rs233576	8.9e-05	0.34	Brain - Frontal Cortex (BA9)
ENSG00000130234.10	ACE2	chrX	15544039	C	T	b38	rs233567	8.9e-05	0.34	Brain - Frontal Cortex (BA9)
ENSG00000130234.10	ACE2	chrX	15477683	G	GT	b38	rs34781767	8.9e-05	0.33	Brain - Cortex
ENSG00000130234.10	ACE2	chrX	15477945	T	C	b38	rs1983287	8.9e-05	0.33	Brain - Cortex
ENSG00000130234.10	ACE2	chrX	15482480	T	TTC	b38	rs72537521	8.9e-05	0.33	Brain - Cortex
ENSG00000130234.10	ACE2	chrX	15486076	A	G	b38	rs6527613	8.9e-05	0.33	Brain - Cortex
ENSG00000130234.10	ACE2	chrX	15645250	C	T	b38	rs3810721	8.9e-05	0.36	Brain - Putamen (basal ganglia)
ENSG00000130234.10	ACE2	chrX	15646260	G	A	b38	rs6632688	8.9e-05	0.36	Brain - Putamen (basal ganglia)
ENSG00000130234.10	ACE2	chrX	15648432	A	T	b38	rs6632690	8.9e-05	0.36	Brain - Putamen (basal ganglia)
ENSG00000130234.10	ACE2	chrX	15648501	T	C	b38	rs6632691	8.9e-05	0.36	Brain - Putamen (basal ganglia)
ENSG00000130234.10	ACE2	chrX	15651488	T	G	b38	rs6629115	8.9e-05	0.36	Brain - Putamen (basal ganglia)
ENSG00000130234.10	ACE2	chrX	15651747	C	T	b38	rs6632693	8.9e-05	0.36	Brain - Putamen (basal ganglia)
ENSG00000130234.10	ACE2	chrX	15682995	C	T	b38	rs4830984	8.9e-05	0.13	Nerve - Tibial
ENSG00000130234.10	ACE2	chrX	15565781	C	G	b38	rs714205	9e-05	0.34	Brain - Caudate (basal ganglia)
ENSG00000130234.10	ACE2	chrX	15599940	T	C	b38	rs1978124	9.1e-05	0.34	Brain - Cerebellar Hemisphere
ENSG00000130234.10	ACE2	chrX	15478610	T	C	b38	rs6632666	9.2e-05	0.31	Brain - Nucleus accumbens (basal ganglia)
ENSG00000130234.10	ACE2	chrX	15481623	A	G	b38	rs5934245	9.2e-05	0.31	Brain - Nucleus accumbens (basal ganglia)
ENSG00000130234.10	ACE2	chrX	15487141	T	C	b38	rs5934246	9.2e-05	0.31	Brain - Nucleus accumbens (basal ganglia)
ENSG00000130234.10	ACE2	chrX	15182657	T	C	b38	rs12010448	9.8e-05	0.43	Muscle - Skeletal
ENSG00000130234.10	ACE2	chrX	15284068	C	T	b38	rs12006793	9.8e-05	-0.1	Adipose - Visceral (Omentum)
ENSG00000130234.10	ACE2	chrX	15780104	A	G	b38	rs5980186	0.0001	-0.3	Brain - Cortex
ENSG00000130234.10	ACE2	chrX	15783207	A	C	b38	rs12841514	0.0001	-0.3	Brain - Cortex
ENSG00000130234.10	ACE2	chrX	15786861	G	A	b38	rs10521650	0.0001	-0.3	Brain - Cortex
ENSG00000130234.10	ACE2	chrX	15787668	A	G	b38	rs5021752	0.0001	-0.3	Brain - Cortex
ENSG00000130234.10	ACE2	chrX	15792103	A	G	b38	rs12556714	0.0001	0.3	Brain - Cortex
ENSG00000130234.10	ACE2	chrX	15635613	C	T	b38	rs5934253	0.0001	0.37	Brain - Putamen (basal ganglia)
ENSG00000130234.10	ACE2	chrX	15645642	C	G	b38	rs5936001	0.0001	0.37	Brain - Putamen (basal ganglia)
ENSG00000130234.10	ACE2	chrX	15645735	A	C	b38	rs5936002	0.0001	0.37	Brain - Putamen (basal ganglia)
ENSG00000130234.10	ACE2	chrX	15611318	T	C	b38	rs2097723	0.0001	0.14	Nerve - Tibial
ENSG00000130234.10	ACE2	chrX	15557256	A	C	b38	rs1132186	0.0001	0.13	Nerve - Tibial
ENSG00000130234.10	ACE2	chrX	15688395	G	C	b38	rs4830986	0.00011	0.15	Artery - Tibial
ENSG00000130234.10	ACE2	chrX	16526278	T	A	b38	rs143695310	0.00011	0.17	Testis
ENSG00000130234.10	ACE2	chrX	16532753	AAGGCT	A	b38	rs3053013	0.00011	0.17	Testis
ENSG00000130234.10	ACE2	chrX	15688395	G	C	b38	rs4830986	0.00011	0.31	Brain - Cerebellum
ENSG00000130234.10	ACE2	chrX	16002736	C	T	b38	rs11798628	0.00011	0.19	Nerve - Tibial
ENSG00000130234.10	ACE2	chrX	16003130	GT	G	b38	rs138393261	0.00011	0.19	Nerve - Tibial
ENSG00000130234.10	ACE2	chrX	16007635	C	A	b38	rs56312794	0.00011	0.19	Nerve - Tibial
ENSG00000130234.10	ACE2	chrX	15688395	G	C	b38	rs4830986	0.00011	0.13	Nerve - Tibial
ENSG00000130234.10	ACE2	chrX	15579712	C	T	b38	rs4646153	0.00011	0.16	Artery - Tibial
ENSG00000130234.10	ACE2	chrX	15579901	A	G	b38	rs4646152	0.00011	0.16	Artery - Tibial
ENSG00000130234.10	ACE2	chrX	15582092	A	C	b38	rs2048684	0.00011	0.16	Artery - Tibial
ENSG00000130234.10	ACE2	chrX	15534441	T	C	b38	rs1877752	0.00011	0.13	Nerve - Tibial
ENSG00000130234.10	ACE2	chrX	14813159	T	C	b38	rs757168376	0.00011	0.26	Adipose - Visceral (Omentum)
ENSG00000130234.10	ACE2	chrX	15635868	C	T	b38	rs6632684	0.00011	0.35	Brain - Caudate (basal ganglia)
ENSG00000130234.10	ACE2	chrX	15654183	C	T	b38	rs5934258	0.00011	0.35	Brain - Caudate (basal ganglia)
ENSG00000130234.10	ACE2	chrX	15646263	G	A	b38	rs5934255	0.00011	0.15	Artery - Tibial
ENSG00000130234.10	ACE2	chrX	15642742	C	T	b38	rs5935998	0.00012	0.31	Brain - Cerebellum
ENSG00000130234.10	ACE2	chrX	15646263	G	A	b38	rs5934255	0.00012	0.31	Brain - Cerebellum
ENSG00000130234.10	ACE2	chrX	15629209	T	C	b38	rs17264937	0.00012	0.14	Nerve - Tibial
ENSG00000130234.10	ACE2	chrX	15725522	C	G	b38	rs5934270	0.00012	0.38	Brain - Cerebellar Hemisphere
ENSG00000130234.10	ACE2	chrX	15498851	A	G	b38	rs6527616	0.00012	0.29	Brain - Caudate (basal ganglia)
ENSG00000130234.10	ACE2	chrX	15702622	G	A	b38	rs56002876	0.00012	0.42	Brain - Cortex
ENSG00000130234.10	ACE2	chrX	15716172	T	C	b38	rs112504565	0.00012	0.42	Brain - Cortex
ENSG00000130234.10	ACE2	chrX	15578020	C	CATAAG	b38	rs113691336	0.00012	0.31	Brain - Cerebellum
ENSG00000130234.10	ACE2	chrX	15596540	G	GT	b38	rs768560726	0.00012	0.31	Brain - Cerebellum
ENSG00000130234.10	ACE2	chrX	15581769	T	TTTAA	b38	rs138373349	0.00012	0.15	Artery - Tibial
ENSG00000130234.10	ACE2	chrX	15537764	C	T	b38	rs5935991	0.00013	0.28	Brain - Cerebellum
ENSG00000130234.10	ACE2	chrX	14654334	TG	T	b38	rs771254609	0.00013	-0.35	Adipose - Visceral (Omentum)
ENSG00000130234.10	ACE2	chrX	15590829	C	T	b38	rs757066	0.00013	0.16	Artery - Tibial
ENSG00000130234.10	ACE2	chrX	15963321	A	C	b38	rs705858	0.00013	-0.33	Brain - Caudate (basal ganglia)
ENSG00000130234.10	ACE2	chrX	15531829	T	TA	b38	rs35139170	0.00013	0.13	Nerve - Tibial
ENSG00000130234.10	ACE2	chrX	15745845	AT	A	b38	rs66671051	0.00014	-0.3	Brain - Cortex
ENSG00000130234.10	ACE2	chrX	15746324	C	T	b38	rs56127019	0.00014	-0.3	Brain - Cortex
ENSG00000130234.10	ACE2	chrX	15722117	C	T	b38	rs12558179	0.00014	0.13	Nerve - Tibial
ENSG00000130234.10	ACE2	chrX	15590263	C	T	b38	rs2158083	0.00014	0.096	Adipose - Subcutaneous
ENSG00000130234.10	ACE2	chrX	15586742	G	A	b38	rs1514279	0.00015	0.096	Adipose - Subcutaneous
ENSG00000130234.10	ACE2	chrX	15555645	A	C	b38	rs2873356	0.00015	0.13	Nerve - Tibial
ENSG00000130234.10	ACE2	chrX	15533163	G	A	b38	rs5935990	0.00015	0.13	Nerve - Tibial
ENSG00000130234.10	ACE2	chrX	15533442	G	A	b38	rs4830541	0.00015	0.13	Nerve - Tibial
ENSG00000130234.10	ACE2	chrX	15534450	G	GA	b38	rs34879154	0.00015	0.13	Nerve - Tibial
ENSG00000130234.10	ACE2	chrX	15534579	C	T	b38	rs1877753	0.00015	0.13	Nerve - Tibial
ENSG00000130234.10	ACE2	chrX	15534633	A	G	b38	rs1399201	0.00015	0.13	Nerve - Tibial
ENSG00000130234.10	ACE2	chrX	15777541	C	G	b38	rs5980185	0.00015	-0.29	Brain - Cortex
ENSG00000130234.10	ACE2	chrX	15642742	C	T	b38	rs5935998	0.00016	0.14	Artery - Tibial
ENSG00000130234.10	ACE2	chrX	15589527	T	C	b38	rs971249	0.00016	0.096	Adipose - Subcutaneous
ENSG00000130234.10	ACE2	chrX	15590376	T	G	b38	rs2048683	0.00016	0.096	Adipose - Subcutaneous
ENSG00000130234.10	ACE2	chrX	15642742	C	T	b38	rs5935998	0.00016	0.13	Nerve - Tibial
ENSG00000130234.10	ACE2	chrX	15718122	T	C	b38	rs1849863	0.00016	0.14	Artery - Tibial
ENSG00000130234.10	ACE2	chrX	15737797	GTGTT	G	b38	rs35251171	0.00016	-0.15	Artery - Tibial
ENSG00000130234.10	ACE2	chrX	15564843	G	A	b38	rs233575	0.00016	0.14	Nerve - Tibial
ENSG00000130234.10	ACE2	chrX	15618418	C	T	b38	rs12007623	0.00017	0.14	Artery - Tibial
ENSG00000130234.10	ACE2	chrX	15535765	TGATA	T	b38	rs35972066	0.00017	0.13	Nerve - Tibial
ENSG00000130234.10	ACE2	chrX	15731193	A	AT	b38	rs35593267	0.00017	-0.31	Brain - Cerebellum
ENSG00000130234.10	ACE2	chrX	15737797	GTGTT	G	b38	rs35251171	0.00017	-0.31	Brain - Cerebellum
ENSG00000130234.10	ACE2	chrX	15745845	AT	A	b38	rs66671051	0.00017	-0.15	Artery - Tibial
ENSG00000130234.10	ACE2	chrX	15746324	C	T	b38	rs56127019	0.00017	-0.15	Artery - Tibial
ENSG00000130234.10	ACE2	chrX	15656962	T	C	b38	rs4830973	0.00017	0.3	Brain - Cerebellum
ENSG00000130234.10	ACE2	chrX	15656998	C	A	b38	rs4830543	0.00017	0.3	Brain - Cerebellum
ENSG00000130234.10	ACE2	chrX	15682995	C	T	b38	rs4830984	0.00017	0.3	Brain - Cerebellum
ENSG00000130234.10	ACE2	chrX	15708323	C	T	b38	rs5936022	0.00017	0.3	Brain - Cerebellum
ENSG00000130234.10	ACE2	chrX	15718122	T	C	b38	rs1849863	0.00017	0.3	Brain - Cerebellum
ENSG00000130234.10	ACE2	chrX	15048607	A	G	b38	rs144734382	0.00018	-0.3	Nerve - Tibial
ENSG00000130234.10	ACE2	chrX	15682995	C	T	b38	rs4830984	0.00018	0.14	Artery - Tibial
ENSG00000130234.10	ACE2	chrX	15624289	G	C	b38	rs1356037	0.00018	0.14	Artery - Tibial
ENSG00000130234.10	ACE2	chrX	15731193	A	AT	b38	rs35593267	0.00018	-0.15	Artery - Tibial
[truncated: 54 more rows]

## Sheet: TMPRSS2_GTEx_eQTL
Transcript	Gene	Chr	Position	Ref	Alt	Genome	rsID	P-Value	NES	Tissue
ENSG00000184012.11	TMPRSS2	chr21	41549662	G	A	b38	rs11701542	5.3e-23	0.6	Testis
ENSG00000184012.11	TMPRSS2	chr21	41552219	C	T	b38	rs62219311	5.3e-23	0.6	Testis
ENSG00000184012.11	TMPRSS2	chr21	41552228	T	A	b38	rs62219312	5.3e-23	0.6	Testis
ENSG00000184012.11	TMPRSS2	chr21	41552967	G	GA	b38	rs368463440	5.3e-23	0.6	Testis
ENSG00000184012.11	TMPRSS2	chr21	41552968	T	TGTA	b38	rs764337939	5.3e-23	0.6	Testis
ENSG00000184012.11	TMPRSS2	chr21	41552970	C	CTCTT	b38	rs148391274	5.3e-23	0.6	Testis
ENSG00000184012.11	TMPRSS2	chr21	41553100	A	G	b38	rs2838059	4.2e-21	0.57	Testis
ENSG00000184012.11	TMPRSS2	chr21	41553757	T	A	b38	rs2838061	1.2e-17	0.52	Testis
ENSG00000184012.11	TMPRSS2	chr21	41549219	T	C	b38	rs13052864	3.5e-16	-0.51	Testis
ENSG00000184012.11	TMPRSS2	chr21	41549790	G	A	b38	rs2838056	3.5e-16	-0.51	Testis
ENSG00000184012.11	TMPRSS2	chr21	41550704	G	A	b38	rs61614992	3.5e-16	-0.51	Testis
ENSG00000184012.11	TMPRSS2	chr21	41553210	C	T	b38	rs13046709	1.1e-14	-0.48	Testis
ENSG00000184012.11	TMPRSS2	chr21	41550269	A	G	b38	rs34498700	4.4e-13	-0.46	Testis
ENSG00000184012.11	TMPRSS2	chr21	41520129	G	A	b38	rs6517673	1.8e-12	-0.3	Prostate
ENSG00000184012.11	TMPRSS2	chr21	41521831	G	A	b38	rs8134378	1.8e-12	-0.3	Prostate
ENSG00000184012.11	TMPRSS2	chr21	41521981	G	A	b38	rs8134657	1.8e-12	-0.3	Prostate
ENSG00000184012.11	TMPRSS2	chr21	41546457	A	G	b38	rs2838055	8e-12	-0.43	Testis
ENSG00000184012.11	TMPRSS2	chr21	41553901	T	C	b38	rs77381400	3.3e-11	0.58	Testis
ENSG00000184012.11	TMPRSS2	chr21	41551329	G	A	b38	rs79037293	3.4e-11	0.58	Testis
ENSG00000184012.11	TMPRSS2	chr21	41461592	AC	A	b38	rs35074065	3.9e-11	0.13	Lung
ENSG00000184012.11	TMPRSS2	chr21	41554226	G	A	b38	rs9305751	3.4e-10	-0.4	Testis
ENSG00000184012.11	TMPRSS2	chr21	41482711	A	T	b38	rs34783969	3.9e-10	0.12	Lung
ENSG00000184012.11	TMPRSS2	chr21	41464259	T	A	b38	rs463727	5e-10	0.12	Lung
ENSG00000184012.11	TMPRSS2	chr21	41481267	TCAGACA	T	b38	rs139374762	7.1e-10	0.12	Lung
ENSG00000184012.11	TMPRSS2	chr21	41481156	A	G	b38	rs4290734	8.3e-10	0.12	Lung
ENSG00000184012.11	TMPRSS2	chr21	41485641	C	T	b38	rs11702475	8.4e-10	0.12	Lung
ENSG00000184012.11	TMPRSS2	chr21	41480393	C	A	b38	rs734056	1.3e-09	0.12	Lung
ENSG00000184012.11	TMPRSS2	chr21	41555593	G	A	b38	rs9975883	1.8e-09	-0.38	Testis
ENSG00000184012.11	TMPRSS2	chr21	41473711	C	T	b38	rs55964536	1.9e-09	0.12	Lung
ENSG00000184012.11	TMPRSS2	chr21	41472130	G	A	b38	rs7364083	3.3e-09	-0.12	Lung
ENSG00000184012.11	TMPRSS2	chr21	41491442	C	T	b38	rs35041537	3.6e-09	0.12	Lung
ENSG00000184012.11	TMPRSS2	chr21	41470196	A	C	b38	rs9974589	7.4e-09	-0.12	Lung
ENSG00000184012.11	TMPRSS2	chr21	41491393	C	A	b38	rs35899679	7.8e-09	0.11	Lung
ENSG00000184012.11	TMPRSS2	chr21	41470061	G	A	b38	rs2070788	8.9e-09	-0.11	Lung
ENSG00000184012.11	TMPRSS2	chr21	41471514	A	AC	b38	rs34624090	9.2e-09	0.12	Lung
ENSG00000184012.11	TMPRSS2	chr21	41491399	A	G	b38	rs417888	1e-08	-0.11	Lung
ENSG00000184012.11	TMPRSS2	chr21	41486440	T	C	b38	rs383510	1.2e-08	-0.11	Lung
ENSG00000184012.11	TMPRSS2	chr21	41471638	G	A	b38	rs467375	1.4e-08	0.11	Lung
ENSG00000184012.11	TMPRSS2	chr21	41554694	A	G	b38	rs13046918	1.4e-08	-0.36	Testis
ENSG00000184012.11	TMPRSS2	chr21	41472035	T	A	b38	rs458213	1.7e-08	0.11	Lung
ENSG00000184012.11	TMPRSS2	chr21	41478148	T	C	b38	rs4818239	1.7e-08	0.11	Lung
ENSG00000184012.11	TMPRSS2	chr21	41485974	C	T	b38	rs62217531	2.3e-08	0.11	Lung
ENSG00000184012.11	TMPRSS2	chr21	41450217	A	G	b38	rs6517668	2.7e-08	-0.11	Lung
ENSG00000184012.11	TMPRSS2	chr21	41450505	G	A	b38	rs13050773	2.7e-08	-0.11	Lung
ENSG00000184012.11	TMPRSS2	chr21	41451056	G	A	b38	rs1050080	2.7e-08	-0.11	Lung
ENSG00000184012.11	TMPRSS2	chr21	41451445	C	T	b38	rs3737399	2.7e-08	-0.11	Lung
ENSG00000184012.11	TMPRSS2	chr21	41451462	A	G	b38	rs3737400	2.7e-08	-0.11	Lung
ENSG00000184012.11	TMPRSS2	chr21	41451468	C	T	b38	rs3737401	2.7e-08	-0.11	Lung
ENSG00000184012.11	TMPRSS2	chr21	41451605	C	T	b38	rs13047535	2.7e-08	-0.11	Lung
ENSG00000184012.11	TMPRSS2	chr21	41451696	G	A	b38	rs13050726	2.7e-08	-0.11	Lung
ENSG00000184012.11	TMPRSS2	chr21	41452806	G	A	b38	rs469304	2.8e-08	0.11	Lung
ENSG00000184012.11	TMPRSS2	chr21	41449719	A	G	b38	rs363976	3.5e-08	0.11	Lung
ENSG00000184012.11	TMPRSS2	chr21	41552469	C	T	b38	rs62219313	3.5e-08	0.43	Testis
ENSG00000184012.11	TMPRSS2	chr21	41450109	C	A	b38	rs6517666	3.9e-08	-0.11	Lung
ENSG00000184012.11	TMPRSS2	chr21	41552501	T	C	b38	rs28609001	4.5e-08	0.43	Testis
ENSG00000184012.11	TMPRSS2	chr21	41453809	G	A	b38	rs467519	4.6e-08	0.11	Lung
ENSG00000184012.11	TMPRSS2	chr21	41454836	A	G	b38	rs467512	4.6e-08	0.11	Lung
ENSG00000184012.11	TMPRSS2	chr21	41455551	G	C	b38	rs468397	4.6e-08	0.11	Lung
ENSG00000184012.11	TMPRSS2	chr21	41456429	A	C	b38	rs401498	5.4e-08	0.11	Lung
ENSG00000184012.11	TMPRSS2	chr21	41549338	C	T	b38	rs4818247	5.7e-08	0.42	Testis
ENSG00000184012.11	TMPRSS2	chr21	41550707	G	A	b38	rs62219306	5.7e-08	0.42	Testis
ENSG00000184012.11	TMPRSS2	chr21	41492816	A	G	b38	rs430915	6.7e-08	-0.11	Lung
ENSG00000184012.11	TMPRSS2	chr21	41548095	G	A	b38	rs1041834	6.7e-08	0.35	Testis
ENSG00000184012.11	TMPRSS2	chr21	41450499	A	T	b38	rs469126	6.9e-08	0.11	Lung
ENSG00000184012.11	TMPRSS2	chr21	41449820	G	A	b38	rs468444	7e-08	0.11	Lung
ENSG00000184012.11	TMPRSS2	chr21	41452947	C	T	b38	rs467798	9.2e-08	0.11	Lung
ENSG00000184012.11	TMPRSS2	chr21	41514305	C	T	b38	rs9979885	1e-07	-0.26	Prostate
ENSG00000184012.11	TMPRSS2	chr21	41561955	G	A	b38	rs17001215	1.5e-07	0.48	Testis
ENSG00000184012.11	TMPRSS2	chr21	41510535	C	T	b38	rs9978557	1.6e-07	-0.25	Prostate
ENSG00000184012.11	TMPRSS2	chr21	41512104	C	T	b38	rs9984523	1.6e-07	-0.25	Prostate
ENSG00000184012.11	TMPRSS2	chr21	41453222	G	C	b38	rs468259	2.6e-07	0.1	Lung
ENSG00000184012.11	TMPRSS2	chr21	41535247	C	T	b38	rs76490606	2.8e-07	0.55	Testis
ENSG00000184012.11	TMPRSS2	chr21	41562480	G	GC	b38	rs35624811	2.9e-07	-0.48	Testis
ENSG00000184012.11	TMPRSS2	chr21	41557202	A	C	b38	rs2838063	3.1e-07	0.37	Testis
ENSG00000184012.11	TMPRSS2	chr21	41554659	G	A	b38	rs2838062	3.5e-07	0.4	Testis
ENSG00000184012.11	TMPRSS2	chr21	41520998	T	G	b38	rs11908828	5.4e-07	-0.34	Testis
ENSG00000184012.11	TMPRSS2	chr21	41505455	T	C	b38	rs75373173	5.6e-07	0.56	Testis
ENSG00000184012.11	TMPRSS2	chr21	41508700	G	A	b38	rs76833541	5.6e-07	0.56	Testis
ENSG00000184012.11	TMPRSS2	chr21	41527742	A	T	b38	rs78509661	5.9e-07	0.53	Testis
ENSG00000184012.11	TMPRSS2	chr21	41555162	G	C	b38	rs4818248	6.4e-07	0.39	Testis
ENSG00000184012.11	TMPRSS2	chr21	41556271	G	A	b38	rs4818249	6.4e-07	0.39	Testis
ENSG00000184012.11	TMPRSS2	chr21	41486054	G	A	b38	rs2298857	8e-07	-0.11	Lung
ENSG00000184012.11	TMPRSS2	chr21	41560787	G	A	b38	rs73359771	8.3e-07	0.46	Testis
ENSG00000184012.11	TMPRSS2	chr21	41560924	C	A	b38	rs73359772	8.3e-07	0.46	Testis
ENSG00000184012.11	TMPRSS2	chr21	41561007	A	G	b38	rs17001207	8.3e-07	0.46	Testis
ENSG00000184012.11	TMPRSS2	chr21	41515627	T	C	b38	rs2097004	8.6e-07	-0.32	Testis
ENSG00000184012.11	TMPRSS2	chr21	41524406	G	T	b38	rs62219277	8.9e-07	0.34	Testis
ENSG00000184012.11	TMPRSS2	chr21	41497070	A	C	b38	rs34983238	9.3e-07	-0.23	Prostate
ENSG00000184012.11	TMPRSS2	chr21	41499618	A	AT	b38	rs34205539	9.3e-07	-0.23	Prostate
ENSG00000184012.11	TMPRSS2	chr21	41506199	A	C	b38	rs28360562	9.3e-07	-0.23	Prostate
ENSG00000184012.11	TMPRSS2	chr21	41509565	T	C	b38	rs8128074	9.7e-07	-0.49	Testis
ENSG00000184012.11	TMPRSS2	chr21	41524462	G	C	b38	rs2838045	1e-06	0.33	Testis
ENSG00000184012.11	TMPRSS2	chr21	41484552	C	T	b38	rs56066678	1.3e-06	-0.11	Lung
ENSG00000184012.11	TMPRSS2	chr21	40724486	G	C	b38	rs79566442	1.4e-06	-1.2	Ovary
ENSG00000184012.11	TMPRSS2	chr21	41531083	C	T	b38	rs713400	1.5e-06	0.49	Testis
ENSG00000184012.11	TMPRSS2	chr21	41513947	T	C	b38	rs4635604	1.5e-06	-0.31	Testis
ENSG00000184012.11	TMPRSS2	chr21	41508701	T	G	b38	rs4283504	1.7e-06	-0.49	Testis
ENSG00000184012.11	TMPRSS2	chr21	41513726	A	T	b38	rs4818243	1.7e-06	-0.49	Testis
ENSG00000184012.11	TMPRSS2	chr21	41448047	C	T	b38	rs8133682	1.8e-06	-0.096	Lung
ENSG00000184012.11	TMPRSS2	chr21	41524593	G	A	b38	rs75579634	1.8e-06	0.48	Testis
ENSG00000184012.11	TMPRSS2	chr21	41519788	C	T	b38	rs7281987	1.8e-06	-0.32	Testis
ENSG00000184012.11	TMPRSS2	chr21	41447278	G	A	b38	rs467574	2.1e-06	0.095	Lung
ENSG00000184012.11	TMPRSS2	chr21	41481636	C	T	b38	rs2410428	2.2e-06	-0.11	Lung
ENSG00000184012.11	TMPRSS2	chr21	41447995	T	C	b38	rs468699	2.7e-06	0.092	Lung
ENSG00000184012.11	TMPRSS2	chr21	41560260	T	C	b38	rs2298686	2.7e-06	0.41	Testis
ENSG00000184012.11	TMPRSS2	chr21	41473456	A	G	b38	rs17854725	2.9e-06	0.087	Lung
ENSG00000184012.11	TMPRSS2	chr21	41516325	T	C	b38	rs6517672	3.1e-06	-0.31	Testis
ENSG00000184012.11	TMPRSS2	chr21	41522634	T	C	b38	rs4818244	3.2e-06	-0.47	Testis
ENSG00000184012.11	TMPRSS2	chr21	41444139	G	A	b38	rs462698	3.3e-06	0.094	Lung
ENSG00000184012.11	TMPRSS2	chr21	41437279	A	C	b38	rs468646	3.4e-06	0.091	Lung
ENSG00000184012.11	TMPRSS2	chr21	41437878	A	G	b38	rs468917	3.4e-06	0.091	Lung
ENSG00000184012.11	TMPRSS2	chr21	41438502	A	C	b38	rs469153	3.4e-06	0.091	Lung
ENSG00000184012.11	TMPRSS2	chr21	41478984	C	T	b38	rs9974995	3.5e-06	-0.1	Lung
ENSG00000184012.11	TMPRSS2	chr21	41479050	A	G	b38	rs9974933	3.5e-06	-0.1	Lung
ENSG00000184012.11	TMPRSS2	chr21	41479079	A	G	b38	rs9975014	3.5e-06	-0.1	Lung
ENSG00000184012.11	TMPRSS2	chr21	41478118	T	C	b38	rs9636988	4.3e-06	-0.1	Lung
ENSG00000184012.11	TMPRSS2	chr21	41434505	G	A	b38	rs363982	5.9e-06	0.09	Lung
ENSG00000184012.11	TMPRSS2	chr21	41434545	C	T	b38	rs364153	5.9e-06	0.09	Lung
ENSG00000184012.11	TMPRSS2	chr21	41436127	C	G	b38	rs468451	5.9e-06	0.09	Lung
ENSG00000184012.11	TMPRSS2	chr21	41436146	A	C	b38	rs468209	5.9e-06	0.09	Lung
ENSG00000184012.11	TMPRSS2	chr21	41446620	G	GA	b38	rs35477708	5.9e-06	0.091	Lung
ENSG00000184012.11	TMPRSS2	chr21	41485788	T	C	b38	rs2257202	6.1e-06	-0.1	Lung
ENSG00000184012.11	TMPRSS2	chr21	41446003	G	A	b38	rs469390	6.8e-06	0.091	Lung
ENSG00000184012.11	TMPRSS2	chr21	41446179	C	T	b38	rs467773	6.8e-06	0.091	Lung
ENSG00000184012.11	TMPRSS2	chr21	41446205	A	G	b38	rs364199	6.8e-06	0.091	Lung
ENSG00000184012.11	TMPRSS2	chr21	41446346	C	T	b38	rs363882	6.8e-06	0.091	Lung
ENSG00000184012.11	TMPRSS2	chr21	41446429	A	C	b38	rs364105	6.8e-06	0.091	Lung
ENSG00000184012.11	TMPRSS2	chr21	41446430	G	A	b38	rs364203	6.8e-06	0.091	Lung
ENSG00000184012.11	TMPRSS2	chr21	41446588	G	A	b38	rs469483	6.8e-06	0.091	Lung
ENSG00000184012.11	TMPRSS2	chr21	41447005	T	A	b38	rs364143	6.8e-06	0.091	Lung
ENSG00000184012.11	TMPRSS2	chr21	41447022	T	G	b38	rs364043	6.8e-06	0.091	Lung
ENSG00000184012.11	TMPRSS2	chr21	41447036	A	C	b38	rs369454	6.8e-06	0.091	Lung
ENSG00000184012.11	TMPRSS2	chr21	41435576	T	C	b38	rs469015	6.8e-06	0.089	Lung
ENSG00000184012.11	TMPRSS2	chr21	41430449	A	C	b38	rs465490	7.9e-06	-0.09	Lung
ENSG00000184012.11	TMPRSS2	chr21	41907341	G	A	b38	rs79391937	8.2e-06	-0.33	Thyroid
ENSG00000184012.11	TMPRSS2	chr21	41444274	A	G	b38	rs469073	8.4e-06	0.09	Lung
ENSG00000184012.11	TMPRSS2	chr21	41447082	G	A	b38	rs467537	8.5e-06	0.089	Lung
ENSG00000184012.11	TMPRSS2	chr21	41489405	C	T	b38	rs429442	8.6e-06	-0.1	Lung
ENSG00000184012.11	TMPRSS2	chr21	41445738	A	G	b38	rs469383	8.7e-06	0.09	Lung
ENSG00000184012.11	TMPRSS2	chr21	41445655	A	G	b38	rs469288	9e-06	0.09	Lung
ENSG00000184012.11	TMPRSS2	chr21	41444578	A	G	b38	rs469093	9.5e-06	0.089	Lung
ENSG00000184012.11	TMPRSS2	chr21	41445250	G	A	b38	rs469270	9.5e-06	0.089	Lung
ENSG00000184012.11	TMPRSS2	chr21	41449822	G	A	b38	rs2075810	9.8e-06	-0.096	Lung
ENSG00000184012.11	TMPRSS2	chr21	41431199	A	C	b38	rs466112	9.8e-06	-0.089	Lung
ENSG00000184012.11	TMPRSS2	chr21	41431317	T	C	b38	rs466135	9.8e-06	-0.089	Lung
ENSG00000184012.11	TMPRSS2	chr21	41431599	T	C	b38	rs466591	9.8e-06	-0.089	Lung
ENSG00000184012.11	TMPRSS2	chr21	41431688	G	A	b38	rs446742	9.8e-06	-0.089	Lung
ENSG00000184012.11	TMPRSS2	chr21	41431913	C	T	b38	rs456657	9.8e-06	-0.089	Lung
ENSG00000184012.11	TMPRSS2	chr21	41431931	A	G	b38	rs463856	9.8e-06	-0.089	Lung
ENSG00000184012.11	TMPRSS2	chr21	41428591	T	C	b38	rs464397	1e-05	-0.089	Lung
ENSG00000184012.11	TMPRSS2	chr21	41447039	G	A	b38	rs365628	1e-05	0.089	Lung
ENSG00000184012.11	TMPRSS2	chr21	41444193	G	T	b38	rs1638369	1e-05	0.088	Lung
ENSG00000184012.11	TMPRSS2	chr21	41445685	G	A	b38	rs469382	1e-05	0.09	Lung
ENSG00000184012.11	TMPRSS2	chr21	41536083	G	A	b38	rs2838048	1.1e-05	0.3	Testis
ENSG00000184012.11	TMPRSS2	chr21	41437620	A	G	b38	rs468867	1.1e-05	0.087	Lung
ENSG00000184012.11	TMPRSS2	chr21	41437795	T	C	b38	rs467692	1.1e-05	0.087	Lung
ENSG00000184012.11	TMPRSS2	chr21	41536286	G	A	b38	rs7278065	1.3e-05	0.3	Testis
ENSG00000184012.11	TMPRSS2	chr21	41492239	A	C	b38	rs392370	1.3e-05	-0.097	Lung
ENSG00000184012.11	TMPRSS2	chr21	41476008	C	T	b38	rs66575656	1.3e-05	-0.097	Lung
ENSG00000184012.11	TMPRSS2	chr21	41449186	T	C	b38	rs2070229	1.5e-05	-0.094	Lung
ENSG00000184012.11	TMPRSS2	chr21	41449687	G	T	b38	rs2075807	1.5e-05	-0.094	Lung
ENSG00000184012.11	TMPRSS2	chr21	41449721	G	A	b38	rs2075808	1.5e-05	-0.094	Lung
ENSG00000184012.11	TMPRSS2	chr21	41450110	C	T	b38	rs6517667	1.5e-05	-0.094	Lung
ENSG00000184012.11	TMPRSS2	chr21	41450714	C	A	b38	rs34223646	1.5e-05	-0.094	Lung
ENSG00000184012.11	TMPRSS2	chr21	41450777	T	A	b38	rs34955673	1.5e-05	-0.094	Lung
ENSG00000184012.11	TMPRSS2	chr21	41450804	C	A	b38	rs58609335	1.5e-05	-0.094	Lung
ENSG00000184012.11	TMPRSS2	chr21	41451625	G	A	b38	rs62217502	1.5e-05	-0.094	Lung
ENSG00000184012.11	TMPRSS2	chr21	41432579	G	T	b38	rs458582	1.5e-05	-0.087	Lung
ENSG00000184012.11	TMPRSS2	chr21	41432752	G	A	b38	rs455599	1.5e-05	-0.087	Lung
ENSG00000184012.11	TMPRSS2	chr21	41491852	T	C	b38	rs391099	1.5e-05	-0.096	Lung
ENSG00000184012.11	TMPRSS2	chr21	41442549	G	A	b38	rs468704	1.6e-05	0.087	Lung
ENSG00000184012.11	TMPRSS2	chr21	41442594	A	G	b38	rs468440	1.6e-05	0.087	Lung
ENSG00000184012.11	TMPRSS2	chr21	41442939	A	G	b38	rs468747	1.6e-05	0.087	Lung
ENSG00000184012.11	TMPRSS2	chr21	41443170	A	ACT	b38	rs10670165	1.6e-05	0.087	Lung
ENSG00000184012.11	TMPRSS2	chr21	41443293	A	G	b38	rs468786	1.6e-05	0.087	Lung
ENSG00000184012.11	TMPRSS2	chr21	41443367	T	C	b38	rs468414	1.6e-05	0.087	Lung
ENSG00000184012.11	TMPRSS2	chr21	41443442	C	T	b38	rs364197	1.6e-05	0.087	Lung
ENSG00000184012.11	TMPRSS2	chr21	41443535	G	A	b38	rs469012	1.6e-05	0.087	Lung
ENSG00000184012.11	TMPRSS2	chr21	41486938	G	A	b38	rs364289	1.6e-05	-0.096	Lung
ENSG00000184012.11	TMPRSS2	chr21	41429682	A	G	b38	rs466513	1.7e-05	-0.087	Lung
ENSG00000184012.11	TMPRSS2	chr21	41430135	A	G	b38	rs466866	1.7e-05	-0.087	Lung
ENSG00000184012.11	TMPRSS2	chr21	41433195	C	T	b38	rs458939	1.8e-05	-0.086	Lung
ENSG00000184012.11	TMPRSS2	chr21	41425679	G	A	b38	rs462903	1.9e-05	-0.086	Lung
ENSG00000184012.11	TMPRSS2	chr21	41437879	G	A	b38	rs469581	1.9e-05	0.085	Lung
ENSG00000184012.11	TMPRSS2	chr21	41434482	G	T	b38	rs363981	1.9e-05	0.086	Lung
ENSG00000184012.11	TMPRSS2	chr21	41434603	C	T	b38	rs364154	1.9e-05	0.086	Lung
ENSG00000184012.11	TMPRSS2	chr21	41436185	T	C	b38	rs469213	1.9e-05	0.086	Lung
ENSG00000184012.11	TMPRSS2	chr21	41436273	G	A	b38	rs468473	1.9e-05	0.086	Lung
ENSG00000184012.11	TMPRSS2	chr21	41483637	G	T	b38	rs9977234	2e-05	-0.099	Lung
ENSG00000184012.11	TMPRSS2	chr21	41432943	C	T	b38	rs457347	2e-05	-0.086	Lung
ENSG00000184012.11	TMPRSS2	chr21	41433106	G	A	b38	rs455816	2e-05	-0.086	Lung
ENSG00000184012.11	TMPRSS2	chr21	41442291	A	G	b38	rs148214	2.2e-05	0.085	Lung
ENSG00000184012.11	TMPRSS2	chr21	41442345	T	C	b38	rs467987	2.2e-05	0.085	Lung
ENSG00000184012.11	TMPRSS2	chr21	41385693	A	T	b38	rs373066	2.2e-05	0.093	Lung
ENSG00000184012.11	TMPRSS2	chr21	41428386	A	AT	b38	rs11407987	2.4e-05	-0.086	Lung
ENSG00000184012.11	TMPRSS2	chr21	41497136	A	G	b38	rs415731	2.4e-05	-0.29	Testis
ENSG00000184012.11	TMPRSS2	chr21	41487759	G	T	b38	rs375760	2.6e-05	-0.098	Lung
ENSG00000184012.11	TMPRSS2	chr21	41427713	A	AC	b38	rs34451317	2.8e-05	-0.084	Lung
ENSG00000184012.11	TMPRSS2	chr21	41460614	C	T	b38	rs1557372	2.9e-05	-0.085	Lung
ENSG00000184012.11	TMPRSS2	chr21	41449769	C	G	b38	rs2075809	3e-05	-0.091	Lung
ENSG00000184012.11	TMPRSS2	chr21	41573354	C	T	b38	rs62219337	3.5e-05	0.29	Testis
ENSG00000184012.11	TMPRSS2	chr21	41435577	G	A	b38	rs468395	4e-05	0.083	Lung
ENSG00000184012.11	TMPRSS2	chr21	41562887	G	A	b38	rs3737426	5.5e-05	-0.34	Testis

## Sheet: DPP4_GTEx_eQTL
Transcript	Gene	Chr	Position	Ref	Alt	Genome	rsID	P-Value	NES	Tissue
ENSG00000197635.9	DPP4	chr2	162115829	A	G	b38	rs10185053	3.9e-18	0.58	Adrenal Gland
ENSG00000197635.9	DPP4	chr2	162125628	T	C	b38	rs2193495	3.9e-18	0.58	Adrenal Gland
ENSG00000197635.9	DPP4	chr2	162111748	C	A	b38	rs2892826	8.4e-18	0.57	Adrenal Gland
ENSG00000197635.9	DPP4	chr2	162112363	C	T	b38	rs11885343	8.4e-18	0.57	Adrenal Gland
ENSG00000197635.9	DPP4	chr2	162113152	A	G	b38	rs11897585	8.4e-18	0.57	Adrenal Gland
ENSG00000197635.9	DPP4	chr2	162113436	G	C	b38	rs7571944	8.4e-18	0.57	Adrenal Gland
ENSG00000197635.9	DPP4	chr2	162115045	TA	T	b38	rs5835898	8.4e-18	0.57	Adrenal Gland
ENSG00000197635.9	DPP4	chr2	162115860	T	A	b38	rs10174056	8.4e-18	0.57	Adrenal Gland
ENSG00000197635.9	DPP4	chr2	162115875	A	G	b38	rs10185151	8.4e-18	0.57	Adrenal Gland
ENSG00000197635.9	DPP4	chr2	162117382	A	C	b38	rs6432709	8.4e-18	0.57	Adrenal Gland
ENSG00000197635.9	DPP4	chr2	162118368	C	T	b38	rs10171070	8.4e-18	0.57	Adrenal Gland
ENSG00000197635.9	DPP4	chr2	162118384	G	A	b38	rs2241242	8.4e-18	0.57	Adrenal Gland
ENSG00000197635.9	DPP4	chr2	162118466	T	C	b38	rs2075300	8.4e-18	0.57	Adrenal Gland
ENSG00000197635.9	DPP4	chr2	162118677	G	A	b38	rs2241243	8.4e-18	0.57	Adrenal Gland
ENSG00000197635.9	DPP4	chr2	162118887	C	T	b38	rs12052431	8.4e-18	0.57	Adrenal Gland
ENSG00000197635.9	DPP4	chr2	162118993	G	T	b38	rs10171915	8.4e-18	0.57	Adrenal Gland
ENSG00000197635.9	DPP4	chr2	162119481	A	T	b38	rs10198168	8.4e-18	0.57	Adrenal Gland
ENSG00000197635.9	DPP4	chr2	162119581	C	A	b38	rs10174693	8.4e-18	0.57	Adrenal Gland
ENSG00000197635.9	DPP4	chr2	162111973	TC	T	b38	rs34022416	8.7e-17	0.55	Adrenal Gland
ENSG00000197635.9	DPP4	chr2	162113193	C	G	b38	rs11886859	8.7e-17	0.55	Adrenal Gland
ENSG00000197635.9	DPP4	chr2	162118659	C	T	b38	rs2075301	8.7e-17	0.55	Adrenal Gland
ENSG00000197635.9	DPP4	chr2	162122301	C	T	b38	rs12692647	8.7e-17	0.55	Adrenal Gland
ENSG00000197635.9	DPP4	chr2	162123411	A	G	b38	rs10930043	8.7e-17	0.55	Adrenal Gland
ENSG00000197635.9	DPP4	chr2	162125936	C	T	b38	rs10490423	8.7e-17	0.55	Adrenal Gland
ENSG00000197635.9	DPP4	chr2	162128319	A	G	b38	rs13431489	4.4e-16	0.54	Adrenal Gland
ENSG00000197635.9	DPP4	chr2	162139713	TG	T	b38	rs34292513	5.2e-16	0.53	Adrenal Gland
ENSG00000197635.9	DPP4	chr2	162135165	T	G	b38	rs2111489	7.6e-16	0.53	Adrenal Gland
ENSG00000197635.9	DPP4	chr2	162135374	A	T	b38	rs1558862	1.3e-15	0.53	Adrenal Gland
ENSG00000197635.9	DPP4	chr2	162133458	G	A	b38	rs2216338	1.5e-15	0.54	Adrenal Gland
ENSG00000197635.9	DPP4	chr2	162138237	CATA	C	b38	rs75959247	2.5e-15	0.52	Adrenal Gland
ENSG00000197635.9	DPP4	chr2	162138649	A	G	b38	rs10209700	4.2e-15	0.51	Adrenal Gland
ENSG00000197635.9	DPP4	chr2	162138712	G	T	b38	rs10186588	4.2e-15	0.51	Adrenal Gland
ENSG00000197635.9	DPP4	chr2	162136962	G	A	b38	rs10180049	6.7e-15	0.51	Adrenal Gland
ENSG00000197635.9	DPP4	chr2	162131015	C	T	b38	rs10194114	8.2e-15	0.52	Adrenal Gland
ENSG00000197635.9	DPP4	chr2	162132318	C	T	b38	rs35596334	8.2e-15	0.52	Adrenal Gland
ENSG00000197635.9	DPP4	chr2	162133393	A	G	b38	rs2389680	8.2e-15	0.52	Adrenal Gland
ENSG00000197635.9	DPP4	chr2	162133780	G	A	b38	rs7607713	8.2e-15	0.52	Adrenal Gland
ENSG00000197635.9	DPP4	chr2	162133859	T	C	b38	rs7568666	8.2e-15	0.52	Adrenal Gland
ENSG00000197635.9	DPP4	chr2	162134066	G	A	b38	rs7608081	8.2e-15	0.52	Adrenal Gland
ENSG00000197635.9	DPP4	chr2	162134217	A	G	b38	rs7564122	8.2e-15	0.52	Adrenal Gland
ENSG00000197635.9	DPP4	chr2	162134737	G	T	b38	rs2389681	8.2e-15	0.52	Adrenal Gland
ENSG00000197635.9	DPP4	chr2	162136221	G	T	b38	rs7598422	1.3e-14	0.51	Adrenal Gland
ENSG00000197635.9	DPP4	chr2	162110331	C	A	b38	rs62189714	3.4e-14	0.5	Adrenal Gland
ENSG00000197635.9	DPP4	chr2	162122641	G	C	b38	rs2389679	1e-13	0.48	Adrenal Gland
ENSG00000197635.9	DPP4	chr2	162110510	C	T	b38	rs4233648	1.8e-13	0.49	Adrenal Gland
ENSG00000197635.9	DPP4	chr2	162140755	G	A	b38	rs7561020	3e-13	0.49	Adrenal Gland
ENSG00000197635.9	DPP4	chr2	162115353	T	C	b38	rs2193679	3.7e-13	0.48	Adrenal Gland
ENSG00000197635.9	DPP4	chr2	162121869	A	C	b38	rs6432710	3.7e-13	0.48	Adrenal Gland
ENSG00000197635.9	DPP4	chr2	162110643	A	ATATGATAT	b38	rs71408200	7.2e-13	0.47	Adrenal Gland
ENSG00000197635.9	DPP4	chr2	162127239	C	T	b38	rs2052352	1e-12	0.47	Adrenal Gland
ENSG00000197635.9	DPP4	chr2	162131135	G	T	b38	rs4395257	1e-12	0.47	Adrenal Gland
ENSG00000197635.9	DPP4	chr2	162138668	T	G	b38	rs10198838	1.2e-12	0.46	Adrenal Gland
ENSG00000197635.9	DPP4	chr2	162105535	T	C	b38	rs2052401	1.6e-12	0.5	Adrenal Gland
ENSG00000197635.9	DPP4	chr2	162136981	C	T	b38	rs7599142	1.8e-12	0.45	Adrenal Gland
ENSG00000197635.9	DPP4	chr2	162132250	A	C	b38	rs13011432	3.8e-12	0.45	Adrenal Gland
ENSG00000197635.9	DPP4	chr2	162133952	C	A	b38	rs7607756	3.8e-12	0.45	Adrenal Gland
ENSG00000197635.9	DPP4	chr2	162131737	C	T	b38	rs7599934	4.6e-12	0.45	Adrenal Gland
ENSG00000197635.9	DPP4	chr2	162137059	G	A	b38	rs7599446	7.9e-12	0.44	Adrenal Gland
ENSG00000197635.9	DPP4	chr2	162138174	A	C	b38	rs6729181	1.2e-11	0.43	Adrenal Gland
ENSG00000197635.9	DPP4	chr2	162132606	A	C	b38	rs10176758	1.6e-11	0.44	Adrenal Gland
ENSG00000197635.9	DPP4	chr2	162107791	G	A	b38	rs75166367	2.9e-10	0.43	Lung
ENSG00000197635.9	DPP4	chr2	162105419	A	G	b38	rs2080712	4.5e-10	0.42	Adrenal Gland
ENSG00000197635.9	DPP4	chr2	162112984	A	G	b38	rs28378735	9.3e-08	0.44	Adrenal Gland
ENSG00000197635.9	DPP4	chr2	162061561	G	A	b38	rs873826	1.5e-07	0.32	Colon - Transverse
ENSG00000197635.9	DPP4	chr2	162060068	G	C	b38	rs34536659	1.6e-07	0.32	Colon - Transverse
ENSG00000197635.9	DPP4	chr2	162067677	CAGTT	C	b38	rs10564811	1.6e-07	0.31	Colon - Transverse
ENSG00000197635.9	DPP4	chr2	162067820	A	G	b38	rs6727102	1.6e-07	0.31	Colon - Transverse
ENSG00000197635.9	DPP4	chr2	162067973	C	G	b38	rs5022713	1.6e-07	0.31	Colon - Transverse
ENSG00000197635.9	DPP4	chr2	162065218	T	C	b38	rs2193681	1.8e-07	0.31	Colon - Transverse
ENSG00000197635.9	DPP4	chr2	162062011	A	G	b38	rs2892816	2e-07	0.31	Colon - Transverse
ENSG00000197635.9	DPP4	chr2	162140755	G	A	b38	rs7561020	2e-07	0.17	Lung
ENSG00000197635.9	DPP4	chr2	162074215	T	G	b38	rs13015258	2.5e-07	-0.16	Lung
ENSG00000197635.9	DPP4	chr2	162065598	T	C	b38	rs2216447	2.8e-07	0.31	Colon - Transverse
ENSG00000197635.9	DPP4	chr2	162067407	G	A	b38	rs12469968	3.7e-07	-0.16	Lung
ENSG00000197635.9	DPP4	chr2	162063042	G	T	b38	rs34450218	4e-07	0.31	Colon - Transverse
ENSG00000197635.9	DPP4	chr2	162111035	T	C	b38	rs35148929	4.4e-07	0.51	Adrenal Gland
ENSG00000197635.9	DPP4	chr2	162068537	G	T	b38	rs2080714	4.6e-07	0.3	Colon - Transverse
ENSG00000197635.9	DPP4	chr2	162118384	G	A	b38	rs2241242	4.7e-07	0.16	Lung
ENSG00000197635.9	DPP4	chr2	162056988	G	C	b38	rs6733162	5e-07	-0.17	Lung
ENSG00000197635.9	DPP4	chr2	162073222	G	A	b38	rs35128070	5.6e-07	0.3	Colon - Transverse
ENSG00000197635.9	DPP4	chr2	162055495	G	A	b38	rs113082932	7.1e-07	-0.35	Colon - Transverse
ENSG00000197635.9	DPP4	chr2	162069108	G	C	b38	rs62189692	7.3e-07	0.29	Colon - Transverse
ENSG00000197635.9	DPP4	chr2	162111748	C	A	b38	rs2892826	8.1e-07	0.16	Lung
ENSG00000197635.9	DPP4	chr2	162112363	C	T	b38	rs11885343	8.1e-07	0.16	Lung
ENSG00000197635.9	DPP4	chr2	162113152	A	G	b38	rs11897585	8.1e-07	0.16	Lung
ENSG00000197635.9	DPP4	chr2	162113436	G	C	b38	rs7571944	8.1e-07	0.16	Lung
ENSG00000197635.9	DPP4	chr2	162115045	TA	T	b38	rs5835898	8.1e-07	0.16	Lung
ENSG00000197635.9	DPP4	chr2	162115860	T	A	b38	rs10174056	8.1e-07	0.16	Lung
ENSG00000197635.9	DPP4	chr2	162115875	A	G	b38	rs10185151	8.1e-07	0.16	Lung
ENSG00000197635.9	DPP4	chr2	162117382	A	C	b38	rs6432709	8.1e-07	0.16	Lung
ENSG00000197635.9	DPP4	chr2	162118368	C	T	b38	rs10171070	8.1e-07	0.16	Lung
ENSG00000197635.9	DPP4	chr2	162073199	T	G	b38	rs1861978	9.3e-07	0.29	Colon - Transverse
ENSG00000197635.9	DPP4	chr2	162118466	T	C	b38	rs2075300	9.3e-07	0.16	Lung
ENSG00000197635.9	DPP4	chr2	162118677	G	A	b38	rs2241243	9.3e-07	0.16	Lung
ENSG00000197635.9	DPP4	chr2	162118887	C	T	b38	rs12052431	1e-06	0.15	Lung
ENSG00000197635.9	DPP4	chr2	162118993	G	T	b38	rs10171915	1e-06	0.15	Lung
ENSG00000197635.9	DPP4	chr2	162119481	A	T	b38	rs10198168	1e-06	0.15	Lung
ENSG00000197635.9	DPP4	chr2	162119581	C	A	b38	rs10174693	1e-06	0.15	Lung
ENSG00000197635.9	DPP4	chr2	162115829	A	G	b38	rs10185053	1.6e-06	0.15	Lung
ENSG00000197635.9	DPP4	chr2	162113193	C	G	b38	rs11886859	1.9e-06	0.15	Lung
ENSG00000197635.9	DPP4	chr2	162133098	C	T	b38	rs34262531	2e-06	0.48	Adrenal Gland
ENSG00000197635.9	DPP4	chr2	162108243	G	A	b38	rs10515929	2.1e-06	0.49	Adrenal Gland
ENSG00000197635.9	DPP4	chr2	162118659	C	T	b38	rs2075301	2.2e-06	0.15	Lung
ENSG00000197635.9	DPP4	chr2	162125628	T	C	b38	rs2193495	2.3e-06	0.15	Lung
ENSG00000197635.9	DPP4	chr2	162056656	T	C	b38	rs67399148	2.4e-06	0.28	Colon - Transverse
ENSG00000197635.9	DPP4	chr2	162111973	TC	T	b38	rs34022416	2.9e-06	0.15	Lung
ENSG00000197635.9	DPP4	chr2	162101850	T	C	b38	rs11695224	3.2e-06	0.27	Lung
ENSG00000197635.9	DPP4	chr2	162066218	A	G	b38	rs62189690	3.5e-06	0.28	Colon - Transverse
ENSG00000197635.9	DPP4	chr2	162066224	T	C	b38	rs62189691	3.5e-06	0.28	Colon - Transverse
ENSG00000197635.9	DPP4	chr2	162110510	C	T	b38	rs4233648	3.7e-06	0.17	Thyroid
ENSG00000197635.9	DPP4	chr2	162141193	G	A	b38	rs1990761	3.7e-06	0.15	Lung
ENSG00000197635.9	DPP4	chr2	162120286	A	C	b38	rs114779135	3.8e-06	0.4	Lung
ENSG00000197635.9	DPP4	chr2	162122301	C	T	b38	rs12692647	4.5e-06	0.15	Lung
ENSG00000197635.9	DPP4	chr2	162123411	A	G	b38	rs10930043	4.5e-06	0.15	Lung
ENSG00000197635.9	DPP4	chr2	162070034	C	T	b38	rs35280626	4.6e-06	0.28	Colon - Transverse
ENSG00000197635.9	DPP4	chr2	162065096	A	G	b38	rs7566261	4.7e-06	-0.28	Colon - Transverse
ENSG00000197635.9	DPP4	chr2	162110331	C	A	b38	rs62189714	4.7e-06	0.17	Thyroid
ENSG00000197635.9	DPP4	chr2	162063721	G	GA	b38	rs59443188	4.8e-06	-0.28	Colon - Transverse
ENSG00000197635.9	DPP4	chr2	162064625	G	A	b38	rs3788976	5.3e-06	-0.28	Colon - Transverse
ENSG00000197635.9	DPP4	chr2	162128319	A	G	b38	rs13431489	5.7e-06	0.14	Lung
ENSG00000197635.9	DPP4	chr2	162154788	TA	T	b38	rs150183165	5.7e-06	0.33	Lung
ENSG00000197635.9	DPP4	chr2	162072790	A	C	b38	rs1861975	5.9e-06	0.27	Colon - Transverse
ENSG00000197635.9	DPP4	chr2	162073044	T	G	b38	rs1861976	5.9e-06	0.27	Colon - Transverse
ENSG00000197635.9	DPP4	chr2	162073045	T	C	b38	rs1861977	5.9e-06	0.27	Colon - Transverse
ENSG00000197635.9	DPP4	chr2	162073469	A	G	b38	rs17574	5.9e-06	0.27	Colon - Transverse
ENSG00000197635.9	DPP4	chr2	162125936	C	T	b38	rs10490423	6.1e-06	0.15	Lung
ENSG00000197635.9	DPP4	chr2	162060827	A	T	b38	rs73009181	7.5e-06	-0.27	Colon - Transverse
ENSG00000197635.9	DPP4	chr2	162057069	T	C	b38	rs75062246	8.6e-06	0.2	Lung
ENSG00000197635.9	DPP4	chr2	162133458	G	A	b38	rs2216338	9.3e-06	0.14	Lung
ENSG00000197635.9	DPP4	chr2	162135165	T	G	b38	rs2111489	1.1e-05	0.14	Lung
ENSG00000197635.9	DPP4	chr2	162101843	G	A	b38	rs11689257	1.1e-05	0.25	Lung
ENSG00000197635.9	DPP4	chr2	162404017	T	G	b38	rs77446212	1.1e-05	0.3	Lung
ENSG00000197635.9	DPP4	chr2	162056656	T	C	b38	rs67399148	1.1e-05	-0.15	Lung
ENSG00000197635.9	DPP4	chr2	162138237	CATA	C	b38	rs75959247	1.4e-05	0.14	Lung
ENSG00000197635.9	DPP4	chr2	162139713	TG	T	b38	rs34292513	1.4e-05	0.14	Lung
ENSG00000197635.9	DPP4	chr2	162131015	C	T	b38	rs10194114	1.6e-05	0.14	Lung
ENSG00000197635.9	DPP4	chr2	162132318	C	T	b38	rs35596334	1.6e-05	0.14	Lung
ENSG00000197635.9	DPP4	chr2	162133393	A	G	b38	rs2389680	1.6e-05	0.14	Lung
ENSG00000197635.9	DPP4	chr2	162133780	G	A	b38	rs7607713	1.6e-05	0.14	Lung
ENSG00000197635.9	DPP4	chr2	162133859	T	C	b38	rs7568666	1.6e-05	0.14	Lung
ENSG00000197635.9	DPP4	chr2	162134066	G	A	b38	rs7608081	1.6e-05	0.14	Lung
ENSG00000197635.9	DPP4	chr2	162134217	A	G	b38	rs7564122	1.6e-05	0.14	Lung
ENSG00000197635.9	DPP4	chr2	162221345	T	A	b38	rs977907	1.6e-05	0.34	Lung
ENSG00000197635.9	DPP4	chr2	162134737	G	T	b38	rs2389681	1.7e-05	0.14	Lung
ENSG00000197635.9	DPP4	chr2	162111973	TC	T	b38	rs34022416	1.8e-05	0.16	Thyroid
ENSG00000197635.9	DPP4	chr2	162135374	A	T	b38	rs1558862	1.8e-05	0.14	Lung
ENSG00000197635.9	DPP4	chr2	162057301	C	A	b38	rs77999304	1.8e-05	-0.32	Colon - Transverse
ENSG00000197635.9	DPP4	chr2	162068537	G	T	b38	rs2080714	2.1e-05	0.23	Brain - Cortex
ENSG00000197635.9	DPP4	chr2	162069108	G	C	b38	rs62189692	2.1e-05	0.23	Brain - Cortex
ENSG00000197635.9	DPP4	chr2	162073222	G	A	b38	rs35128070	2.1e-05	0.23	Brain - Cortex
ENSG00000197635.9	DPP4	chr2	162136962	G	A	b38	rs10180049	2.4e-05	0.14	Lung
ENSG00000197635.9	DPP4	chr2	162138649	A	G	b38	rs10209700	2.5e-05	0.14	Lung
ENSG00000197635.9	DPP4	chr2	162138712	G	T	b38	rs10186588	2.5e-05	0.14	Lung
ENSG00000197635.9	DPP4	chr2	162122301	C	T	b38	rs12692647	2.5e-05	0.16	Thyroid
ENSG00000197635.9	DPP4	chr2	162123411	A	G	b38	rs10930043	2.5e-05	0.16	Thyroid
ENSG00000197635.9	DPP4	chr2	162118659	C	T	b38	rs2075301	2.5e-05	0.16	Thyroid
ENSG00000197635.9	DPP4	chr2	162070034	C	T	b38	rs35280626	2.7e-05	0.24	Brain - Cortex
ENSG00000197635.9	DPP4	chr2	162113193	C	G	b38	rs11886859	2.7e-05	0.16	Thyroid
ENSG00000197635.9	DPP4	chr2	162082957	G	A	b38	rs10930042	2.8e-05	-0.28	Adrenal Gland
ENSG00000197635.9	DPP4	chr2	162136221	G	T	b38	rs7598422	3.1e-05	0.13	Lung
ENSG00000197635.9	DPP4	chr2	162079774	A	G	b38	rs6754128	3.2e-05	-0.28	Adrenal Gland
ENSG00000197635.9	DPP4	chr2	162066218	A	G	b38	rs62189690	3.3e-05	-0.15	Lung
ENSG00000197635.9	DPP4	chr2	162073199	T	G	b38	rs1861978	3.3e-05	0.22	Brain - Cortex
ENSG00000197635.9	DPP4	chr2	162111748	C	A	b38	rs2892826	3.5e-05	0.16	Thyroid
ENSG00000197635.9	DPP4	chr2	162112363	C	T	b38	rs11885343	3.5e-05	0.16	Thyroid
ENSG00000197635.9	DPP4	chr2	162113152	A	G	b38	rs11897585	3.5e-05	0.16	Thyroid
ENSG00000197635.9	DPP4	chr2	162113436	G	C	b38	rs7571944	3.5e-05	0.16	Thyroid
ENSG00000197635.9	DPP4	chr2	162115045	TA	T	b38	rs5835898	3.5e-05	0.16	Thyroid
ENSG00000197635.9	DPP4	chr2	162115860	T	A	b38	rs10174056	3.5e-05	0.16	Thyroid
ENSG00000197635.9	DPP4	chr2	162115875	A	G	b38	rs10185151	3.5e-05	0.16	Thyroid
ENSG00000197635.9	DPP4	chr2	162117382	A	C	b38	rs6432709	3.5e-05	0.16	Thyroid
ENSG00000197635.9	DPP4	chr2	162118368	C	T	b38	rs10171070	3.5e-05	0.16	Thyroid
ENSG00000197635.9	DPP4	chr2	161420578	T	C	b38	rs73971191	3.5e-05	0.73	Artery - Aorta
ENSG00000197635.9	DPP4	chr2	162118384	G	A	b38	rs2241242	3.6e-05	0.16	Thyroid
ENSG00000197635.9	DPP4	chr2	162066224	T	C	b38	rs62189691	4e-05	-0.14	Lung
ENSG00000197635.9	DPP4	chr2	162072790	A	C	b38	rs1861975	4.1e-05	0.22	Brain - Cortex
ENSG00000197635.9	DPP4	chr2	162073044	T	G	b38	rs1861976	4.1e-05	0.22	Brain - Cortex
ENSG00000197635.9	DPP4	chr2	162073045	T	C	b38	rs1861977	4.1e-05	0.22	Brain - Cortex
ENSG00000197635.9	DPP4	chr2	162073469	A	G	b38	rs17574	4.1e-05	0.22	Brain - Cortex
ENSG00000197635.9	DPP4	chr2	162118466	T	C	b38	rs2075300	4.2e-05	0.15	Thyroid
ENSG00000197635.9	DPP4	chr2	162115829	A	G	b38	rs10185053	4.2e-05	0.15	Thyroid
ENSG00000197635.9	DPP4	chr2	162125936	C	T	b38	rs10490423	4.7e-05	0.15	Thyroid
ENSG00000197635.9	DPP4	chr2	162139713	TG	T	b38	rs34292513	4.8e-05	0.15	Thyroid
ENSG00000197635.9	DPP4	chr2	162218378	T	C	b38	rs71424731	5.1e-05	0.28	Lung
ENSG00000197635.9	DPP4	chr2	162232496	G	T	b38	rs35701596	5.1e-05	0.28	Lung
ENSG00000197635.9	DPP4	chr2	162237663	C	A	b38	rs34693174	5.1e-05	0.28	Lung
ENSG00000197635.9	DPP4	chr2	162118677	G	A	b38	rs2241243	5.1e-05	0.15	Thyroid
ENSG00000197635.9	DPP4	chr2	162118887	C	T	b38	rs12052431	5.1e-05	0.15	Thyroid
ENSG00000197635.9	DPP4	chr2	162118993	G	T	b38	rs10171915	5.1e-05	0.15	Thyroid
ENSG00000197635.9	DPP4	chr2	162119481	A	T	b38	rs10198168	5.1e-05	0.15	Thyroid
ENSG00000197635.9	DPP4	chr2	162119581	C	A	b38	rs10174693	5.1e-05	0.15	Thyroid
ENSG00000197635.9	DPP4	chr2	162067677	CAGTT	C	b38	rs10564811	5.3e-05	-0.14	Lung
ENSG00000197635.9	DPP4	chr2	162067820	A	G	b38	rs6727102	5.3e-05	-0.14	Lung
ENSG00000197635.9	DPP4	chr2	162067973	C	G	b38	rs5022713	5.3e-05	-0.14	Lung
ENSG00000197635.9	DPP4	chr2	162138649	A	G	b38	rs10209700	6.2e-05	0.15	Thyroid
ENSG00000197635.9	DPP4	chr2	162138712	G	T	b38	rs10186588	6.2e-05	0.15	Thyroid
ENSG00000197635.9	DPP4	chr2	161701844	CACA	C	b38	rs148183493	6.3e-05	0.59	Colon - Transverse
ENSG00000197635.9	DPP4	chr2	162478378	A	G	b38	rs75920367	6.7e-05	0.28	Lung
ENSG00000197635.9	DPP4	chr2	162135374	A	T	b38	rs1558862	7.6e-05	0.15	Thyroid
ENSG00000197635.9	DPP4	chr2	162395068	A	C	b38	rs140595660	7.9e-05	0.79	Artery - Aorta
ENSG00000197635.9	DPP4	chr2	161843037	A	G	b38	rs73971390	7.9e-05	0.73	Artery - Aorta
ENSG00000197635.9	DPP4	chr2	161857359	T	C	b38	rs73971392	7.9e-05	0.73	Artery - Aorta
ENSG00000197635.9	DPP4	chr2	162110643	A	ATATGATAT	b38	rs71408200	8e-05	0.15	Thyroid
ENSG00000197635.9	DPP4	chr2	161937668	T	C	b38	rs73971503	8.1e-05	0.72	Artery - Aorta
ENSG00000197635.9	DPP4	chr2	162135165	T	G	b38	rs2111489	8.1e-05	0.15	Thyroid
ENSG00000197635.9	DPP4	chr2	162136221	G	T	b38	rs7598422	8.6e-05	0.15	Thyroid
ENSG00000197635.9	DPP4	chr2	162154725	T	G	b38	rs3761656	8.6e-05	0.21	Lung
ENSG00000197635.9	DPP4	chr2	162133458	G	A	b38	rs2216338	8.8e-05	0.15	Thyroid
ENSG00000197635.9	DPP4	chr2	162136962	G	A	b38	rs10180049	9e-05	0.15	Thyroid
ENSG00000197635.9	DPP4	chr2	162134737	G	T	b38	rs2389681	9.2e-05	0.15	Thyroid
ENSG00000197635.9	DPP4	chr2	162131015	C	T	b38	rs10194114	9.7e-05	0.15	Thyroid
ENSG00000197635.9	DPP4	chr2	162132318	C	T	b38	rs35596334	9.7e-05	0.15	Thyroid
ENSG00000197635.9	DPP4	chr2	162133393	A	G	b38	rs2389680	9.7e-05	0.15	Thyroid
ENSG00000197635.9	DPP4	chr2	162133780	G	A	b38	rs7607713	9.7e-05	0.15	Thyroid
ENSG00000197635.9	DPP4	chr2	162133859	T	C	b38	rs7568666	9.7e-05	0.15	Thyroid
ENSG00000197635.9	DPP4	chr2	162134066	G	A	b38	rs7608081	9.7e-05	0.15	Thyroid
ENSG00000197635.9	DPP4	chr2	162134217	A	G	b38	rs7564122	9.7e-05	0.15	Thyroid
ENSG00000197635.9	DPP4	chr2	162060068	G	C	b38	rs34536659	0.0001	-0.14	Lung
ENSG00000197635.9	DPP4	chr2	162260675	G	T	b38	rs17713557	0.0001	0.26	Lung
ENSG00000197635.9	DPP4	chr2	162269807	A	G	b38	rs34298676	0.0001	0.26	Lung
ENSG00000197635.9	DPP4	chr2	162270288	G	C	b38	rs12993854	0.0001	0.26	Lung
ENSG00000197635.9	DPP4	chr2	162073044	T	G	b38	rs1861976	0.0001	-0.13	Lung
ENSG00000197635.9	DPP4	chr2	162073045	T	C	b38	rs1861977	0.0001	-0.13	Lung
ENSG00000197635.9	DPP4	chr2	162073469	A	G	b38	rs17574	0.0001	-0.13	Lung
ENSG00000197635.9	DPP4	chr2	162062011	A	G	b38	rs2892816	0.00011	-0.14	Lung
ENSG00000197635.9	DPP4	chr2	162065598	T	C	b38	rs2216447	0.00012	-0.14	Lung
ENSG00000197635.9	DPP4	chr2	162128319	A	G	b38	rs13431489	0.00012	0.14	Thyroid
ENSG00000197635.9	DPP4	chr2	162074215	T	G	b38	rs13015258	0.00012	-0.14	Thyroid
ENSG00000197635.9	DPP4	chr2	162139742	T	C	b38	rs77840913	0.00012	-0.56	Colon - Transverse
ENSG00000197635.9	DPP4	chr2	162082957	G	A	b38	rs10930042	0.00012	-0.12	Lung
ENSG00000197635.9	DPP4	chr2	162072790	A	C	b38	rs1861975	0.00012	-0.13	Lung
ENSG00000197635.9	DPP4	chr2	162141173	A	G	b38	rs79950401	0.00013	0.22	Cells - Cultured fibroblasts
ENSG00000197635.9	DPP4	chr2	162110331	C	A	b38	rs62189714	0.00013	0.13	Lung
ENSG00000197635.9	DPP4	chr2	162056988	G	C	b38	rs6733162	0.00014	-0.14	Thyroid
ENSG00000197635.9	DPP4	chr2	162138237	CATA	C	b38	rs75959247	0.00014	0.14	Thyroid
ENSG00000197635.9	DPP4	chr2	162140755	G	A	b38	rs7561020	0.00014	0.14	Thyroid
ENSG00000197635.9	DPP4	chr2	162184894	A	G	b38	rs71424730	0.00014	0.25	Lung
ENSG00000197635.9	DPP4	chr2	162065218	T	C	b38	rs2193681	0.00016	-0.13	Lung
ENSG00000197635.9	DPP4	chr2	162125628	T	C	b38	rs2193495	0.00017	0.14	Thyroid
ENSG00000197635.9	DPP4	chr2	162061561	G	A	b38	rs873826	0.00017	-0.13	Lung
ENSG00000197635.9	DPP4	chr2	162164613	C	G	b38	rs80063898	0.00018	0.34	Lung
ENSG00000197635.9	DPP4	chr2	162136981	C	T	b38	rs7599142	0.00018	0.14	Thyroid
ENSG00000197635.9	DPP4	chr2	161497065	CTGAG	C	b38	rs140070355	0.00019	0.63	Artery - Aorta
ENSG00000197635.9	DPP4	chr2	161723886	C	T	b38	rs73971357	0.00019	0.58	Artery - Aorta
ENSG00000197635.9	DPP4	chr2	162138668	T	G	b38	rs10198838	0.00021	0.14	Thyroid
ENSG00000197635.9	DPP4	chr2	162141072	TTC	T	b38	rs140295113	0.00022	0.28	Lung
ENSG00000197635.9	DPP4	chr2	162115353	T	C	b38	rs2193679	0.00023	0.12	Lung
ENSG00000197635.9	DPP4	chr2	162100900	C	T	b38	rs72870425	0.00023	-0.16	Cells - Cultured fibroblasts
ENSG00000197635.9	DPP4	chr2	162141100	T	A	b38	rs73973006	0.00024	0.16	Cells - Cultured fibroblasts
ENSG00000197635.9	DPP4	chr2	162122641	G	C	b38	rs2389679	0.00024	0.11	Lung
ENSG00000197635.9	DPP4	chr2	162099546	T	G	b38	rs72870422	0.00025	-0.16	Cells - Cultured fibroblasts
ENSG00000197635.9	DPP4	chr2	162132250	A	C	b38	rs13011432	0.00029	0.14	Thyroid
ENSG00000197635.9	DPP4	chr2	162133952	C	A	b38	rs7607756	0.00029	0.14	Thyroid

## Sheet: GTEx_LY6E_eQTL
Transcript	Gene	Chr	Position	Ref	Alt	Genome	rsID	P-Value	NES	Tissue
ENSG00000160932.10	LY6E	chr8	143015916	C	T	b38	rs62525085	1.9e-42	-0.4	Cells - Cultured fibroblasts
ENSG00000160932.10	LY6E	chr8	143015960	C	G	b38	rs62525087	1.9e-42	-0.4	Cells - Cultured fibroblasts
ENSG00000160932.10	LY6E	chr8	143013832	G	A	b38	rs7812819	3.6e-42	-0.4	Cells - Cultured fibroblasts
ENSG00000160932.10	LY6E	chr8	143013213	C	G	b38	rs4272356	3.7e-36	-0.37	Cells - Cultured fibroblasts
ENSG00000160932.10	LY6E	chr8	143014251	G	A	b38	rs12681773	2.2e-34	-0.37	Cells - Cultured fibroblasts
ENSG00000160932.10	LY6E	chr8	143012898	G	A	b38	rs4385452	3e-34	-0.37	Cells - Cultured fibroblasts
ENSG00000160932.10	LY6E	chr8	143012511	C	T	b38	rs4270939	2.1e-32	-0.35	Cells - Cultured fibroblasts
ENSG00000160932.10	LY6E	chr8	143012733	C	T	b38	rs4270940	3.7e-32	-0.35	Cells - Cultured fibroblasts
ENSG00000160932.10	LY6E	chr8	143012599	A	G	b38	rs4401834	3.5e-31	-0.35	Cells - Cultured fibroblasts
ENSG00000160932.10	LY6E	chr8	143012447	C	T	b38	rs4270938	1e-30	-0.35	Cells - Cultured fibroblasts
ENSG00000160932.10	LY6E	chr8	143009940	C	G	b38	rs62525082	1.5e-30	-0.36	Cells - Cultured fibroblasts
ENSG00000160932.10	LY6E	chr8	143016036	A	G	b38	rs13279735	1.7e-29	0.36	Cells - Cultured fibroblasts
ENSG00000160932.10	LY6E	chr8	143024892	G	A	b38	rs13439114	1.8e-26	-0.33	Cells - Cultured fibroblasts
ENSG00000160932.10	LY6E	chr8	143023156	A	C	b38	rs11787222	1.9e-25	-0.32	Cells - Cultured fibroblasts
ENSG00000160932.10	LY6E	chr8	143002864	T	C	b38	rs13273708	5.2e-23	0.34	Cells - Cultured fibroblasts
ENSG00000160932.10	LY6E	chr8	143004322	T	C	b38	rs11777509	5.2e-23	0.34	Cells - Cultured fibroblasts
ENSG00000160932.10	LY6E	chr8	143006044	G	C	b38	rs11136265	5.2e-23	0.34	Cells - Cultured fibroblasts
ENSG00000160932.10	LY6E	chr8	143009541	A	G	b38	rs34102715	5.2e-23	0.34	Cells - Cultured fibroblasts
ENSG00000160932.10	LY6E	chr8	143009714	GT	G	b38	rs113368759	5.2e-23	0.34	Cells - Cultured fibroblasts
ENSG00000160932.10	LY6E	chr8	143009944	G	C	b38	rs11782082	5.2e-23	0.34	Cells - Cultured fibroblasts
ENSG00000160932.10	LY6E	chr8	143009986	A	G	b38	rs11779710	5.2e-23	0.34	Cells - Cultured fibroblasts
ENSG00000160932.10	LY6E	chr8	143010029	G	A	b38	rs11782111	5.2e-23	0.34	Cells - Cultured fibroblasts
ENSG00000160932.10	LY6E	chr8	143010109	C	T	b38	rs11775990	5.2e-23	0.34	Cells - Cultured fibroblasts
ENSG00000160932.10	LY6E	chr8	142991622	C	T	b38	rs28398942	1.4e-22	0.31	Cells - Cultured fibroblasts
ENSG00000160932.10	LY6E	chr8	142991686	G	A	b38	rs28693770	1.4e-22	0.31	Cells - Cultured fibroblasts
ENSG00000160932.10	LY6E	chr8	143003041	T	C	b38	rs9792229	1.7e-22	0.33	Cells - Cultured fibroblasts
ENSG00000160932.10	LY6E	chr8	142999364	C	G	b38	rs62524583	6.3e-22	-0.31	Cells - Cultured fibroblasts
ENSG00000160932.10	LY6E	chr8	142999684	T	C	b38	rs12682372	6.3e-22	-0.31	Cells - Cultured fibroblasts
ENSG00000160932.10	LY6E	chr8	142999736	T	C	b38	rs12682386	6.3e-22	-0.31	Cells - Cultured fibroblasts
ENSG00000160932.10	LY6E	chr8	142999832	C	T	b38	rs12681184	6.3e-22	-0.31	Cells - Cultured fibroblasts
ENSG00000160932.10	LY6E	chr8	143000778	G	A	b38	rs58785005	8.1e-22	-0.31	Cells - Cultured fibroblasts
ENSG00000160932.10	LY6E	chr8	142993653	C	CAGA	b38	rs148956502	8.7e-22	0.31	Cells - Cultured fibroblasts
ENSG00000160932.10	LY6E	chr8	142994397	CA	C	b38	rs5895738	9e-22	-0.31	Cells - Cultured fibroblasts
ENSG00000160932.10	LY6E	chr8	143001611	T	A	b38	rs4977141	3.2e-21	-0.31	Cells - Cultured fibroblasts
ENSG00000160932.10	LY6E	chr8	143008821	C	A	b38	rs7462015	4.2e-21	-0.32	Cells - Cultured fibroblasts
ENSG00000160932.10	LY6E	chr8	143009271	C	T	b38	rs62525080	4.2e-21	-0.32	Cells - Cultured fibroblasts
ENSG00000160932.10	LY6E	chr8	143010799	G	A	b38	rs7832588	8.6e-21	0.31	Cells - Cultured fibroblasts
ENSG00000160932.10	LY6E	chr8	142999959	T	C	b38	rs12682437	2.2e-20	-0.3	Cells - Cultured fibroblasts
ENSG00000160932.10	LY6E	chr8	143003115	T	C	b38	rs7004686	2.3e-20	0.31	Cells - Cultured fibroblasts
ENSG00000160932.10	LY6E	chr8	143004254	A	AC	b38	rs71313259	2.3e-20	0.31	Cells - Cultured fibroblasts
ENSG00000160932.10	LY6E	chr8	143005588	C	T	b38	rs13263165	2.3e-20	0.31	Cells - Cultured fibroblasts
ENSG00000160932.10	LY6E	chr8	143008172	C	A	b38	rs4596631	2.3e-20	0.31	Cells - Cultured fibroblasts
ENSG00000160932.10	LY6E	chr8	143008423	T	G	b38	rs4645544	2.3e-20	0.31	Cells - Cultured fibroblasts
ENSG00000160932.10	LY6E	chr8	143000489	T	C	b38	rs62525863	2.8e-20	-0.3	Cells - Cultured fibroblasts
ENSG00000160932.10	LY6E	chr8	143000767	C	T	b38	rs60000126	2.8e-20	-0.3	Cells - Cultured fibroblasts
ENSG00000160932.10	LY6E	chr8	143000868	T	C	b38	rs60299647	2.8e-20	-0.3	Cells - Cultured fibroblasts
ENSG00000160932.10	LY6E	chr8	142985356	T	C	b38	rs13272489	4.8e-20	0.3	Cells - Cultured fibroblasts
ENSG00000160932.10	LY6E	chr8	142993864	C	T	b38	rs4424237	5.8e-20	-0.3	Cells - Cultured fibroblasts
ENSG00000160932.10	LY6E	chr8	142995826	A	T	b38	rs12548954	5.8e-20	-0.3	Cells - Cultured fibroblasts
ENSG00000160932.10	LY6E	chr8	142995836	T	C	b38	rs12547761	5.8e-20	-0.3	Cells - Cultured fibroblasts
ENSG00000160932.10	LY6E	chr8	142996523	G	A	b38	rs6993581	5.8e-20	-0.3	Cells - Cultured fibroblasts
ENSG00000160932.10	LY6E	chr8	142996969	T	TA	b38	rs556668690	5.8e-20	-0.3	Cells - Cultured fibroblasts
ENSG00000160932.10	LY6E	chr8	142997887	A	G	b38	rs55871229	5.8e-20	-0.3	Cells - Cultured fibroblasts
ENSG00000160932.10	LY6E	chr8	142998171	G	A	b38	rs12675512	5.8e-20	-0.3	Cells - Cultured fibroblasts
ENSG00000160932.10	LY6E	chr8	143019697	T	C	b38	rs58558679	5.8e-19	-0.3	Cells - Cultured fibroblasts
ENSG00000160932.10	LY6E	chr8	143021076	C	T	b38	rs11136286	2.4e-18	0.31	Cells - Cultured fibroblasts
ENSG00000160932.10	LY6E	chr8	143026084	G	A	b38	rs4433125	2.4e-18	0.31	Cells - Cultured fibroblasts
ENSG00000160932.10	LY6E	chr8	143023609	TCCCGGTGTTCGGGC	T	b38	rs147881012	2.6e-18	0.31	Cells - Cultured fibroblasts
ENSG00000160932.10	LY6E	chr8	143023925	A	G	b38	rs7823963	3.4e-18	0.31	Cells - Cultured fibroblasts
ENSG00000160932.10	LY6E	chr8	143022525	G	A	b38	rs71513676	5.5e-18	0.31	Cells - Cultured fibroblasts
ENSG00000160932.10	LY6E	chr8	143013741	G	A	b38	rs371698004	4.7e-17	-1	Esophagus - Mucosa
ENSG00000160932.10	LY6E	chr8	143022896	T	C	b38	rs4483136	1.4e-16	0.29	Cells - Cultured fibroblasts
ENSG00000160932.10	LY6E	chr8	143013213	C	G	b38	rs4272356	3.1e-16	-0.25	Nerve - Tibial
ENSG00000160932.10	LY6E	chr8	143010749	A	G	b38	rs7820624	3.2e-16	0.27	Cells - Cultured fibroblasts
ENSG00000160932.10	LY6E	chr8	143015916	C	T	b38	rs62525085	3.6e-16	-0.25	Nerve - Tibial
ENSG00000160932.10	LY6E	chr8	143015960	C	G	b38	rs62525087	3.6e-16	-0.25	Nerve - Tibial
ENSG00000160932.10	LY6E	chr8	142985663	G	A	b38	rs13248022	6.9e-16	0.26	Cells - Cultured fibroblasts
ENSG00000160932.10	LY6E	chr8	143013832	G	A	b38	rs7812819	7.3e-16	-0.25	Nerve - Tibial
ENSG00000160932.10	LY6E	chr8	142999768	C	T	b38	rs6558328	7.8e-16	0.26	Cells - Cultured fibroblasts
ENSG00000160932.10	LY6E	chr8	143011767	T	C	b38	rs28884511	1.3e-15	-1.2	Esophagus - Mucosa
ENSG00000160932.10	LY6E	chr8	143013213	C	G	b38	rs4272356	1.4e-15	-0.22	Testis
ENSG00000160932.10	LY6E	chr8	143027275	C	T	b38	rs11993173	1.9e-15	0.29	Cells - Cultured fibroblasts
ENSG00000160932.10	LY6E	chr8	143011215	C	T	b38	rs28571180	2.8e-15	-1.2	Esophagus - Mucosa
ENSG00000160932.10	LY6E	chr8	143009072	C	T	b38	rs28876441	3.1e-15	-1.2	Esophagus - Mucosa
ENSG00000160932.10	LY6E	chr8	143010208	G	C	b38	rs57621073	3.1e-15	-1.2	Esophagus - Mucosa
ENSG00000160932.10	LY6E	chr8	143009174	C	T	b38	rs28802398	3.1e-15	-1.2	Esophagus - Mucosa
ENSG00000160932.10	LY6E	chr8	143015916	C	T	b38	rs62525085	3.2e-15	-0.22	Testis
ENSG00000160932.10	LY6E	chr8	143015960	C	G	b38	rs62525087	3.2e-15	-0.22	Testis
ENSG00000160932.10	LY6E	chr8	143013832	G	A	b38	rs7812819	3.4e-15	-0.22	Testis
ENSG00000160932.10	LY6E	chr8	143013378	G	GA	b38	rs140891896	3.6e-15	-0.97	Esophagus - Mucosa
ENSG00000160932.10	LY6E	chr8	143018292	C	A	b38	rs114909654	3.6e-15	-0.97	Esophagus - Mucosa
ENSG00000160932.10	LY6E	chr8	143009940	C	G	b38	rs62525082	9.5e-15	-0.23	Testis
ENSG00000160932.10	LY6E	chr8	143012447	C	T	b38	rs4270938	1.3e-14	-0.22	Testis
ENSG00000160932.10	LY6E	chr8	143029421	G	C	b38	rs12543021	1.3e-14	0.28	Cells - Cultured fibroblasts
ENSG00000160932.10	LY6E	chr8	143012898	G	A	b38	rs4385452	1.4e-14	-0.22	Testis
ENSG00000160932.10	LY6E	chr8	143029037	A	G	b38	rs4977145	1.4e-14	0.28	Cells - Cultured fibroblasts
ENSG00000160932.10	LY6E	chr8	143010573	A	G	b38	rs59952573	2.1e-14	-1.3	Esophagus - Mucosa
ENSG00000160932.10	LY6E	chr8	143012898	G	A	b38	rs4385452	2.6e-14	-0.24	Nerve - Tibial
ENSG00000160932.10	LY6E	chr8	143029506	T	C	b38	rs12549971	3e-14	0.28	Cells - Cultured fibroblasts
ENSG00000160932.10	LY6E	chr8	143030196	G	A	b38	rs13250459	3.3e-14	0.28	Cells - Cultured fibroblasts
ENSG00000160932.10	LY6E	chr8	143006677	T	C	b38	rs60252207	3.9e-14	-1.2	Esophagus - Mucosa
ENSG00000160932.10	LY6E	chr8	143024360	C	T	b38	rs61408559	6.4e-14	-0.96	Esophagus - Mucosa
ENSG00000160932.10	LY6E	chr8	143024892	G	A	b38	rs13439114	6.8e-14	-0.23	Nerve - Tibial
ENSG00000160932.10	LY6E	chr8	143027843	C	T	b38	rs11136290	8.2e-14	-0.27	Cells - Cultured fibroblasts
ENSG00000160932.10	LY6E	chr8	143014251	G	A	b38	rs12681773	9.5e-14	-0.22	Testis
ENSG00000160932.10	LY6E	chr8	143012733	C	T	b38	rs4270940	1e-13	-0.2	Testis
ENSG00000160932.10	LY6E	chr8	143033666	G	C	b38	rs55937049	1.3e-13	0.26	Cells - Cultured fibroblasts
ENSG00000160932.10	LY6E	chr8	143032605	C	T	b38	rs11984715	1.4e-13	0.27	Cells - Cultured fibroblasts
ENSG00000160932.10	LY6E	chr8	143012599	A	G	b38	rs4401834	1.4e-13	-0.2	Testis
ENSG00000160932.10	LY6E	chr8	143011013	C	T	b38	rs4130872	1.7e-13	-1.2	Esophagus - Mucosa
ENSG00000160932.10	LY6E	chr8	143000987	T	A	b38	rs10441626	1.8e-13	-0.24	Cells - Cultured fibroblasts
ENSG00000160932.10	LY6E	chr8	143012733	C	T	b38	rs4270940	2.3e-13	-0.23	Nerve - Tibial
ENSG00000160932.10	LY6E	chr8	143012511	C	T	b38	rs4270939	2.4e-13	-0.2	Testis
ENSG00000160932.10	LY6E	chr8	143029276	G	T	b38	rs7005405	3.6e-13	-0.26	Cells - Cultured fibroblasts
ENSG00000160932.10	LY6E	chr8	142991622	C	T	b38	rs28398942	3.9e-13	0.23	Nerve - Tibial
ENSG00000160932.10	LY6E	chr8	142991686	G	A	b38	rs28693770	3.9e-13	0.23	Nerve - Tibial
ENSG00000160932.10	LY6E	chr8	143033208	G	A	b38	rs141771359	4.1e-13	-0.92	Esophagus - Mucosa
ENSG00000160932.10	LY6E	chr8	143014251	G	A	b38	rs12681773	4.6e-13	-0.23	Nerve - Tibial
ENSG00000160932.10	LY6E	chr8	143012599	A	G	b38	rs4401834	4.8e-13	-0.22	Nerve - Tibial
ENSG00000160932.10	LY6E	chr8	142999364	C	G	b38	rs62524583	5.2e-13	-0.24	Nerve - Tibial
ENSG00000160932.10	LY6E	chr8	142994397	CA	C	b38	rs5895738	7.6e-13	-0.24	Nerve - Tibial
ENSG00000160932.10	LY6E	chr8	143001611	T	A	b38	rs4977141	8.1e-13	-0.21	Testis
ENSG00000160932.10	LY6E	chr8	143022771	T	C	b38	rs4483135	8.3e-13	1.2	Esophagus - Mucosa
ENSG00000160932.10	LY6E	chr8	143012447	C	T	b38	rs4270938	8.4e-13	-0.22	Nerve - Tibial
ENSG00000160932.10	LY6E	chr8	143023156	A	C	b38	rs11787222	9.9e-13	-0.22	Nerve - Tibial
ENSG00000160932.10	LY6E	chr8	143013722	GCCCAGCCTGCCCCGTCCCGC	G	b38	rs144124007	1.1e-12	-0.51	Esophagus - Mucosa
ENSG00000160932.10	LY6E	chr8	142984100	T	C	b38	rs10085965	1.5e-12	0.24	Cells - Cultured fibroblasts
ENSG00000160932.10	LY6E	chr8	142999684	T	C	b38	rs12682372	1.5e-12	-0.23	Nerve - Tibial
ENSG00000160932.10	LY6E	chr8	142999736	T	C	b38	rs12682386	1.5e-12	-0.23	Nerve - Tibial
ENSG00000160932.10	LY6E	chr8	142999832	C	T	b38	rs12681184	1.5e-12	-0.23	Nerve - Tibial
ENSG00000160932.10	LY6E	chr8	143000778	G	A	b38	rs58785005	1.5e-12	-0.23	Nerve - Tibial
ENSG00000160932.10	LY6E	chr8	142993653	C	CAGA	b38	rs148956502	1.7e-12	0.23	Nerve - Tibial
ENSG00000160932.10	LY6E	chr8	143012511	C	T	b38	rs4270939	2.9e-12	-0.21	Nerve - Tibial
ENSG00000160932.10	LY6E	chr8	143026403	GGAGAGGAGGGGCTGCGGTGAA	G	b38	rs146834091	3.6e-12	-0.3	Nerve - Tibial
ENSG00000160932.10	LY6E	chr8	143024892	G	A	b38	rs13439114	6.5e-12	-0.19	Testis
ENSG00000160932.10	LY6E	chr8	143019620	C	T	b38	rs61695204	6.8e-12	-0.25	Cells - Cultured fibroblasts
ENSG00000160932.10	LY6E	chr8	143026560	A	G	b38	rs10283236	8e-12	-0.18	Whole Blood
ENSG00000160932.10	LY6E	chr8	142993864	C	T	b38	rs4424237	1.2e-11	-0.22	Nerve - Tibial
ENSG00000160932.10	LY6E	chr8	142995826	A	T	b38	rs12548954	1.2e-11	-0.22	Nerve - Tibial
ENSG00000160932.10	LY6E	chr8	142995836	T	C	b38	rs12547761	1.2e-11	-0.22	Nerve - Tibial
ENSG00000160932.10	LY6E	chr8	142996523	G	A	b38	rs6993581	1.2e-11	-0.22	Nerve - Tibial
ENSG00000160932.10	LY6E	chr8	142996969	T	TA	b38	rs556668690	1.2e-11	-0.22	Nerve - Tibial
ENSG00000160932.10	LY6E	chr8	142997887	A	G	b38	rs55871229	1.2e-11	-0.22	Nerve - Tibial
ENSG00000160932.10	LY6E	chr8	142998171	G	A	b38	rs12675512	1.2e-11	-0.22	Nerve - Tibial
ENSG00000160932.10	LY6E	chr8	142985356	T	C	b38	rs13272489	1.2e-11	0.22	Nerve - Tibial
ENSG00000160932.10	LY6E	chr8	143012998	C	T	b38	rs58273647	1.4e-11	-0.74	Esophagus - Mucosa
ENSG00000160932.10	LY6E	chr8	143013459	C	G	b38	rs60094831	1.4e-11	-0.74	Esophagus - Mucosa
ENSG00000160932.10	LY6E	chr8	142999959	T	C	b38	rs12682437	1.9e-11	-0.22	Nerve - Tibial
ENSG00000160932.10	LY6E	chr8	143000489	T	C	b38	rs62525863	1.9e-11	-0.22	Nerve - Tibial
ENSG00000160932.10	LY6E	chr8	143000767	C	T	b38	rs60000126	1.9e-11	-0.22	Nerve - Tibial
ENSG00000160932.10	LY6E	chr8	143000868	T	C	b38	rs60299647	1.9e-11	-0.22	Nerve - Tibial
ENSG00000160932.10	LY6E	chr8	143016036	A	G	b38	rs13279735	2.5e-11	0.2	Testis
ENSG00000160932.10	LY6E	chr8	143023156	A	C	b38	rs11787222	3.5e-11	-0.19	Testis
ENSG00000160932.10	LY6E	chr8	143026560	A	G	b38	rs10283236	4.6e-11	-0.28	Nerve - Tibial
ENSG00000160932.10	LY6E	chr8	143002864	T	C	b38	rs13273708	5.5e-11	0.21	Testis
ENSG00000160932.10	LY6E	chr8	143003041	T	C	b38	rs9792229	5.5e-11	0.21	Testis
ENSG00000160932.10	LY6E	chr8	143004322	T	C	b38	rs11777509	5.5e-11	0.21	Testis
ENSG00000160932.10	LY6E	chr8	143006044	G	C	b38	rs11136265	5.5e-11	0.21	Testis
ENSG00000160932.10	LY6E	chr8	143009541	A	G	b38	rs34102715	5.5e-11	0.21	Testis
ENSG00000160932.10	LY6E	chr8	143009714	GT	G	b38	rs113368759	5.5e-11	0.21	Testis
ENSG00000160932.10	LY6E	chr8	143009944	G	C	b38	rs11782082	5.5e-11	0.21	Testis
ENSG00000160932.10	LY6E	chr8	143009986	A	G	b38	rs11779710	5.5e-11	0.21	Testis
ENSG00000160932.10	LY6E	chr8	143010029	G	A	b38	rs11782111	5.5e-11	0.21	Testis
ENSG00000160932.10	LY6E	chr8	143010109	C	T	b38	rs11775990	5.5e-11	0.21	Testis
ENSG00000160932.10	LY6E	chr8	143018261	G	A	b38	rs17061979	9.9e-11	-0.48	Esophagus - Mucosa
ENSG00000160932.10	LY6E	chr8	143021330	C	T	b38	rs11547127	9.9e-11	-0.48	Esophagus - Mucosa
ENSG00000160932.10	LY6E	chr8	143030952	T	C	b38	rs4977146	2.4e-10	0.23	Cells - Cultured fibroblasts
ENSG00000160932.10	LY6E	chr8	143008821	C	A	b38	rs7462015	2.7e-10	-0.19	Testis
ENSG00000160932.10	LY6E	chr8	143003115	T	C	b38	rs7004686	3.2e-10	0.19	Testis
ENSG00000160932.10	LY6E	chr8	143004254	A	AC	b38	rs71313259	3.2e-10	0.19	Testis
ENSG00000160932.10	LY6E	chr8	143005588	C	T	b38	rs13263165	3.2e-10	0.2	Testis
ENSG00000160932.10	LY6E	chr8	143008172	C	A	b38	rs4596631	3.2e-10	0.2	Testis
ENSG00000160932.10	LY6E	chr8	143008423	T	G	b38	rs4645544	3.2e-10	0.2	Testis
ENSG00000160932.10	LY6E	chr8	143023925	A	G	b38	rs7823963	4.2e-10	0.2	Testis
ENSG00000160932.10	LY6E	chr8	143009940	C	G	b38	rs62525082	4.3e-10	-0.2	Nerve - Tibial
ENSG00000160932.10	LY6E	chr8	142988304	G	A	b38	rs35899216	4.4e-10	0.23	Cells - Cultured fibroblasts
ENSG00000160932.10	LY6E	chr8	143021076	C	T	b38	rs11136286	4.5e-10	0.2	Testis
ENSG00000160932.10	LY6E	chr8	143023609	TCCCGGTGTTCGGGC	T	b38	rs147881012	4.5e-10	0.2	Testis
ENSG00000160932.10	LY6E	chr8	143026084	G	A	b38	rs4433125	4.5e-10	0.2	Testis
ENSG00000160932.10	LY6E	chr8	142985820	C	T	b38	rs13263729	6e-10	0.22	Cells - Cultured fibroblasts
ENSG00000160932.10	LY6E	chr8	143009271	C	T	b38	rs62525080	6.2e-10	-0.19	Testis
ENSG00000160932.10	LY6E	chr8	142995306	AG	A	b38	rs35679135	6.5e-10	0.22	Cells - Cultured fibroblasts
ENSG00000160932.10	LY6E	chr8	143028319	G	A	b38	rs115291173	7.4e-10	-0.71	Esophagus - Mucosa
ENSG00000160932.10	LY6E	chr8	143029995	G	A	b38	rs115253640	7.4e-10	-0.71	Esophagus - Mucosa
ENSG00000160932.10	LY6E	chr8	142978276	T	C	b38	rs28481421	9.7e-10	-0.2	Cells - Cultured fibroblasts
ENSG00000160932.10	LY6E	chr8	142984973	G	T	b38	rs78904892	1e-09	0.22	Cells - Cultured fibroblasts
ENSG00000160932.10	LY6E	chr8	143022525	G	A	b38	rs71513676	1.5e-09	0.19	Testis
ENSG00000160932.10	LY6E	chr8	142991622	C	T	b38	rs28398942	1.6e-09	0.18	Testis
ENSG00000160932.10	LY6E	chr8	142991686	G	A	b38	rs28693770	1.6e-09	0.18	Testis
ENSG00000160932.10	LY6E	chr8	143033228	G	A	b38	rs146262366	2.4e-09	-0.7	Esophagus - Mucosa
ENSG00000160932.10	LY6E	chr8	142979538	G	A	b38	rs62524579	2.9e-09	-0.19	Cells - Cultured fibroblasts
ENSG00000160932.10	LY6E	chr8	142985356	T	C	b38	rs13272489	3.2e-09	0.18	Testis
ENSG00000160932.10	LY6E	chr8	142991622	C	T	b38	rs28398942	3.4e-09	-0.35	Liver
ENSG00000160932.10	LY6E	chr8	142991686	G	A	b38	rs28693770	3.4e-09	-0.35	Liver
ENSG00000160932.10	LY6E	chr8	142993864	C	T	b38	rs4424237	3.9e-09	-0.17	Testis
ENSG00000160932.10	LY6E	chr8	142995826	A	T	b38	rs12548954	3.9e-09	-0.17	Testis
ENSG00000160932.10	LY6E	chr8	142995836	T	C	b38	rs12547761	3.9e-09	-0.17	Testis
ENSG00000160932.10	LY6E	chr8	142996523	G	A	b38	rs6993581	3.9e-09	-0.17	Testis
ENSG00000160932.10	LY6E	chr8	142996969	T	TA	b38	rs556668690	3.9e-09	-0.17	Testis
ENSG00000160932.10	LY6E	chr8	142997887	A	G	b38	rs55871229	3.9e-09	-0.17	Testis
ENSG00000160932.10	LY6E	chr8	142998171	G	A	b38	rs12675512	3.9e-09	-0.17	Testis
ENSG00000160932.10	LY6E	chr8	143010799	G	A	b38	rs7832588	4e-09	0.18	Testis
ENSG00000160932.10	LY6E	chr8	142993864	C	T	b38	rs4424237	4.1e-09	0.34	Liver
ENSG00000160932.10	LY6E	chr8	142995826	A	T	b38	rs12548954	4.1e-09	0.34	Liver
ENSG00000160932.10	LY6E	chr8	142995836	T	C	b38	rs12547761	4.1e-09	0.34	Liver
ENSG00000160932.10	LY6E	chr8	142996523	G	A	b38	rs6993581	4.1e-09	0.34	Liver
ENSG00000160932.10	LY6E	chr8	142996969	T	TA	b38	rs556668690	4.1e-09	0.34	Liver
ENSG00000160932.10	LY6E	chr8	142997887	A	G	b38	rs55871229	4.1e-09	0.34	Liver
ENSG00000160932.10	LY6E	chr8	142998171	G	A	b38	rs12675512	4.1e-09	0.34	Liver
ENSG00000160932.10	LY6E	chr8	142999959	T	C	b38	rs12682437	4.1e-09	0.34	Liver
ENSG00000160932.10	LY6E	chr8	143000489	T	C	b38	rs62525863	4.1e-09	0.34	Liver
ENSG00000160932.10	LY6E	chr8	143000767	C	T	b38	rs60000126	4.1e-09	0.34	Liver
ENSG00000160932.10	LY6E	chr8	143000868	T	C	b38	rs60299647	4.1e-09	0.34	Liver
ENSG00000160932.10	LY6E	chr8	142994397	CA	C	b38	rs5895738	4.2e-09	-0.18	Testis
ENSG00000160932.10	LY6E	chr8	142999959	T	C	b38	rs12682437	4.5e-09	-0.17	Testis
ENSG00000160932.10	LY6E	chr8	143000489	T	C	b38	rs62525863	4.5e-09	-0.17	Testis
ENSG00000160932.10	LY6E	chr8	143000767	C	T	b38	rs60000126	4.5e-09	-0.17	Testis
ENSG00000160932.10	LY6E	chr8	143000868	T	C	b38	rs60299647	4.5e-09	-0.17	Testis
ENSG00000160932.10	LY6E	chr8	142993653	C	CAGA	b38	rs148956502	5.7e-09	0.17	Testis
ENSG00000160932.10	LY6E	chr8	143027275	C	T	b38	rs11993173	6.1e-09	0.19	Testis
ENSG00000160932.10	LY6E	chr8	142999364	C	G	b38	rs62524583	8e-09	-0.17	Testis
ENSG00000160932.10	LY6E	chr8	143022896	T	C	b38	rs4483136	8e-09	0.18	Testis
ENSG00000160932.10	LY6E	chr8	142999684	T	C	b38	rs12682372	9.1e-09	-0.17	Testis
ENSG00000160932.10	LY6E	chr8	142999736	T	C	b38	rs12682386	9.1e-09	-0.17	Testis
ENSG00000160932.10	LY6E	chr8	142999832	C	T	b38	rs12681184	9.1e-09	-0.17	Testis
ENSG00000160932.10	LY6E	chr8	143000778	G	A	b38	rs58785005	9.1e-09	-0.17	Testis
ENSG00000160932.10	LY6E	chr8	142972874	C	T	b38	rs10108559	9.4e-09	-0.19	Cells - Cultured fibroblasts
ENSG00000160932.10	LY6E	chr8	142969776	G	A	b38	rs28431910	1e-08	-0.19	Cells - Cultured fibroblasts
ENSG00000160932.10	LY6E	chr8	143026403	GGAGAGGAGGGGCTGCGGTGAA	G	b38	rs146834091	1.1e-08	-0.15	Whole Blood
ENSG00000160932.10	LY6E	chr8	143019697	T	C	b38	rs58558679	1.2e-08	-0.19	Nerve - Tibial
ENSG00000160932.10	LY6E	chr8	143030196	G	A	b38	rs13250459	1.2e-08	0.18	Testis
ENSG00000160932.10	LY6E	chr8	142985663	G	A	b38	rs13248022	1.2e-08	0.17	Testis
ENSG00000160932.10	LY6E	chr8	142985356	T	C	b38	rs13272489	1.2e-08	-0.33	Liver
ENSG00000160932.10	LY6E	chr8	143027109	G	C	b38	rs7825028	1.3e-08	0.2	Whole Blood
ENSG00000160932.10	LY6E	chr8	143029506	T	C	b38	rs12549971	1.5e-08	0.18	Testis
ENSG00000160932.10	LY6E	chr8	142970419	C	A	b38	rs112871255	1.5e-08	-0.19	Cells - Cultured fibroblasts
ENSG00000160932.10	LY6E	chr8	142971374	G	A	b38	rs10090696	1.5e-08	-0.19	Cells - Cultured fibroblasts
ENSG00000160932.10	LY6E	chr8	142973100	A	G	b38	rs57026081	1.5e-08	-0.19	Cells - Cultured fibroblasts
ENSG00000160932.10	LY6E	chr8	142976503	CTGAG	C	b38	rs146554497	1.5e-08	-0.19	Cells - Cultured fibroblasts
ENSG00000160932.10	LY6E	chr8	142978495	G	A	b38	rs28505089	1.5e-08	-0.19	Cells - Cultured fibroblasts
ENSG00000160932.10	LY6E	chr8	142994397	CA	C	b38	rs5895738	1.6e-08	0.33	Liver
ENSG00000160932.10	LY6E	chr8	142999364	C	G	b38	rs62524583	1.6e-08	0.33	Liver
ENSG00000160932.10	LY6E	chr8	142999684	T	C	b38	rs12682372	1.6e-08	0.33	Liver
ENSG00000160932.10	LY6E	chr8	142999736	T	C	b38	rs12682386	1.6e-08	0.33	Liver
ENSG00000160932.10	LY6E	chr8	142999832	C	T	b38	rs12681184	1.6e-08	0.33	Liver
ENSG00000160932.10	LY6E	chr8	143000778	G	A	b38	rs58785005	1.6e-08	0.33	Liver
ENSG00000160932.10	LY6E	chr8	142968451	C	A	b38	rs28477982	1.7e-08	-0.19	Cells - Cultured fibroblasts
ENSG00000160932.10	LY6E	chr8	143033666	G	C	b38	rs55937049	1.8e-08	0.18	Testis
ENSG00000160932.10	LY6E	chr8	143029037	A	G	b38	rs4977145	1.8e-08	0.18	Testis
ENSG00000160932.10	LY6E	chr8	143029421	G	C	b38	rs12543021	1.8e-08	0.18	Testis
ENSG00000160932.10	LY6E	chr8	143032605	C	T	b38	rs11984715	1.9e-08	0.18	Testis
ENSG00000160932.10	LY6E	chr8	142985663	G	A	b38	rs13248022	3e-08	0.18	Nerve - Tibial
ENSG00000160932.10	LY6E	chr8	143012599	A	G	b38	rs4401834	3.5e-08	-0.38	Adrenal Gland
ENSG00000160932.10	LY6E	chr8	143012733	C	T	b38	rs4270940	3.5e-08	-0.38	Adrenal Gland
ENSG00000160932.10	LY6E	chr8	143024390	ACTTCCCCG	A	b38	rs145406495	3.9e-08	0.19	Whole Blood
ENSG00000160932.10	LY6E	chr8	143018261	G	A	b38	rs17061979	4.2e-08	0.36	Nerve - Tibial
ENSG00000160932.10	LY6E	chr8	143021330	C	T	b38	rs11547127	4.2e-08	0.36	Nerve - Tibial
ENSG00000160932.10	LY6E	chr8	143024390	ACTTCCCCG	A	b38	rs145406495	4.8e-08	0.3	Nerve - Tibial
ENSG00000160932.10	LY6E	chr8	142954999	G	C	b38	rs62524569	5.1e-08	-0.18	Cells - Cultured fibroblasts
ENSG00000160932.10	LY6E	chr8	142956398	G	A	b38	rs3935387	5.1e-08	-0.18	Cells - Cultured fibroblasts
ENSG00000160932.10	LY6E	chr8	142961207	A	T	b38	rs9692989	5.1e-08	-0.18	Cells - Cultured fibroblasts
ENSG00000160932.10	LY6E	chr8	143000987	T	A	b38	rs10441626	5.1e-08	-0.18	Nerve - Tibial
ENSG00000160932.10	LY6E	chr8	143027038	G	T	b38	rs7824896	5.2e-08	0.2	Whole Blood
ENSG00000160932.10	LY6E	chr8	143027581	C	T	b38	rs13271122	5.3e-08	0.25	Testis
ENSG00000160932.10	LY6E	chr8	143010749	A	G	b38	rs7820624	5.3e-08	0.16	Testis
ENSG00000160932.10	LY6E	chr8	143013832	G	A	b38	rs7812819	6.2e-08	0.21	Brain - Nucleus accumbens (basal ganglia)
ENSG00000160932.10	LY6E	chr8	143015916	C	T	b38	rs62525085	6.2e-08	0.21	Brain - Nucleus accumbens (basal ganglia)
ENSG00000160932.10	LY6E	chr8	143015960	C	G	b38	rs62525087	6.2e-08	0.21	Brain - Nucleus accumbens (basal ganglia)
ENSG00000160932.10	LY6E	chr8	142993653	C	CAGA	b38	rs148956502	6.3e-08	-0.32	Liver
ENSG00000160932.10	LY6E	chr8	143026785	C	T	b38	rs59912214	7.4e-08	0.3	Nerve - Tibial
ENSG00000160932.10	LY6E	chr8	143027260	A	AC	b38	rs11378733	7.6e-08	0.29	Nerve - Tibial
ENSG00000160932.10	LY6E	chr8	143027260	A	AC	b38	rs11378733	7.8e-08	0.19	Whole Blood
ENSG00000160932.10	LY6E	chr8	143027109	G	C	b38	rs7825028	8e-08	0.3	Nerve - Tibial
ENSG00000160932.10	LY6E	chr8	142999768	C	T	b38	rs6558328	8.2e-08	0.18	Nerve - Tibial
ENSG00000160932.10	LY6E	chr8	142976969	G	C	b38	rs9720260	8.5e-08	-0.18	Cells - Cultured fibroblasts
ENSG00000160932.10	LY6E	chr8	143022771	T	C	b38	rs4483135	9.3e-08	0.62	Skin - Sun Exposed (Lower leg)
ENSG00000160932.10	LY6E	chr8	142954082	G	A	b38	rs28469769	9.7e-08	-0.18	Cells - Cultured fibroblasts
ENSG00000160932.10	LY6E	chr8	142978296	T	C	b38	rs9773022	1.1e-07	0.18	Cells - Cultured fibroblasts
ENSG00000160932.10	LY6E	chr8	143026785	C	T	b38	rs59912214	1.3e-07	0.19	Whole Blood
ENSG00000160932.10	LY6E	chr8	142982858	C	T	b38	rs28641077	1.5e-07	-0.17	Cells - Cultured fibroblasts
ENSG00000160932.10	LY6E	chr8	143729715	G	C	b38	rs11994280	1.6e-07	-0.52	Esophagus - Mucosa
ENSG00000160932.10	LY6E	chr8	143011760	G	A	b38	rs113739887	1.9e-07	-0.3	Nerve - Tibial
ENSG00000160932.10	LY6E	chr8	143011767	T	C	b38	rs28884511	2e-07	-0.56	Skin - Sun Exposed (Lower leg)
ENSG00000160932.10	LY6E	chr8	142840396	A	G	b38	rs3750247	2e-07	-0.17	Cells - Cultured fibroblasts
ENSG00000160932.10	LY6E	chr8	143014251	G	A	b38	rs12681773	2e-07	0.34	Liver
ENSG00000160932.10	LY6E	chr8	143012898	G	A	b38	rs4385452	2.3e-07	-0.24	Pancreas
ENSG00000160932.10	LY6E	chr8	143012511	C	T	b38	rs4270939	2.3e-07	-0.35	Adrenal Gland
ENSG00000160932.10	LY6E	chr8	143016036	A	G	b38	rs13279735	2.4e-07	-0.22	Brain - Nucleus accumbens (basal ganglia)
ENSG00000160932.10	LY6E	chr8	143013722	GCCCAGCCTGCCCCGTCCCGC	G	b38	rs144124007	2.4e-07	0.32	Nerve - Tibial
ENSG00000160932.10	LY6E	chr8	142923844	A	C	b38	rs7011889	2.6e-07	-0.17	Cells - Cultured fibroblasts
ENSG00000160932.10	LY6E	chr8	143027038	G	T	b38	rs7824896	2.6e-07	-0.32	Esophagus - Mucosa
ENSG00000160932.10	LY6E	chr8	143012898	G	A	b38	rs4385452	2.6e-07	-0.15	Adipose - Subcutaneous
ENSG00000160932.10	LY6E	chr8	143012733	C	T	b38	rs4270940	2.9e-07	0.2	Brain - Nucleus accumbens (basal ganglia)
ENSG00000160932.10	LY6E	chr8	143027260	A	AC	b38	rs11378733	3.2e-07	-0.31	Esophagus - Mucosa
ENSG00000160932.10	LY6E	chr8	142984133	G	A	b38	rs76098244	3.2e-07	0.16	Cells - Cultured fibroblasts
ENSG00000160932.10	LY6E	chr8	143013832	G	A	b38	rs7812819	3.3e-07	-0.35	Adrenal Gland
ENSG00000160932.10	LY6E	chr8	143024892	G	A	b38	rs13439114	3.3e-07	0.22	Brain - Nucleus accumbens (basal ganglia)
ENSG00000160932.10	LY6E	chr8	143015916	C	T	b38	rs62525085	3.5e-07	-0.15	Adipose - Subcutaneous
ENSG00000160932.10	LY6E	chr8	143015960	C	G	b38	rs62525087	3.5e-07	-0.15	Adipose - Subcutaneous
ENSG00000160932.10	LY6E	chr8	142938855	C	T	b38	rs138088171	3.5e-07	-0.17	Cells - Cultured fibroblasts
ENSG00000160932.10	LY6E	chr8	143011215	C	T	b38	rs28571180	3.6e-07	-0.55	Skin - Sun Exposed (Lower leg)
ENSG00000160932.10	LY6E	chr8	143028251	C	G	b38	rs76588306	3.9e-07	-0.57	Esophagus - Mucosa
ENSG00000160932.10	LY6E	chr8	143030325	CA	C	b38	rs60059771	3.9e-07	-0.57	Esophagus - Mucosa
ENSG00000160932.10	LY6E	chr8	143012733	C	T	b38	rs4270940	4e-07	-0.15	Adipose - Subcutaneous
ENSG00000160932.10	LY6E	chr8	143012599	A	G	b38	rs4401834	4e-07	0.2	Brain - Nucleus accumbens (basal ganglia)
ENSG00000160932.10	LY6E	chr8	143023156	A	C	b38	rs11787222	4e-07	0.22	Brain - Nucleus accumbens (basal ganglia)
ENSG00000160932.10	LY6E	chr8	143026403	GGAGAGGAGGGGCTGCGGTGAA	G	b38	rs146834091	4.2e-07	-0.21	Adipose - Subcutaneous
ENSG00000160932.10	LY6E	chr8	143019697	T	C	b38	rs58558679	4.3e-07	-0.16	Testis
ENSG00000160932.10	LY6E	chr8	143460839	T	C	b38	rs113383821	4.4e-07	-3.4	Brain - Cortex
ENSG00000160932.10	LY6E	chr8	142984100	T	C	b38	rs10085965	4.7e-07	0.16	Nerve - Tibial
ENSG00000160932.10	LY6E	chr8	142978128	C	T	b38	rs9774224	4.7e-07	0.16	Cells - Cultured fibroblasts
ENSG00000160932.10	LY6E	chr8	143001802	C	G	b38	rs28863262	4.8e-07	-0.76	Esophagus - Mucosa
ENSG00000160932.10	LY6E	chr8	143009786	A	G	b38	rs11779643	4.9e-07	-1.1	Vagina
ENSG00000160932.10	LY6E	chr8	143012599	A	G	b38	rs4401834	5.1e-07	-0.15	Adipose - Subcutaneous
ENSG00000160932.10	LY6E	chr8	143022018	C	T	b38	rs4464948	5.1e-07	-0.35	Nerve - Tibial
ENSG00000160932.10	LY6E	chr8	143027821	C	A	b38	rs12335001	5.2e-07	0.29	Whole Blood
ENSG00000160932.10	LY6E	chr8	143013213	C	G	b38	rs4272356	5.4e-07	-0.35	Adrenal Gland
ENSG00000160932.10	LY6E	chr8	143012447	C	T	b38	rs4270938	5.7e-07	0.2	Brain - Nucleus accumbens (basal ganglia)
ENSG00000160932.10	LY6E	chr8	143012447	C	T	b38	rs4270938	5.8e-07	-0.34	Adrenal Gland
ENSG00000160932.10	LY6E	chr8	143012511	C	T	b38	rs4270939	5.9e-07	0.19	Brain - Nucleus accumbens (basal ganglia)
ENSG00000160932.10	LY6E	chr8	142976448	C	T	b38	rs67610765	6e-07	0.16	Cells - Cultured fibroblasts
ENSG00000160932.10	LY6E	chr8	142976482	T	C	b38	rs67989690	6e-07	0.16	Cells - Cultured fibroblasts
ENSG00000160932.10	LY6E	chr8	142976709	A	C	b38	rs67092448	6e-07	0.16	Cells - Cultured fibroblasts
ENSG00000160932.10	LY6E	chr8	142977114	A	G	b38	rs9720644	6e-07	0.16	Cells - Cultured fibroblasts
ENSG00000160932.10	LY6E	chr8	142977125	C	T	b38	rs9694909	6e-07	0.16	Cells - Cultured fibroblasts
ENSG00000160932.10	LY6E	chr8	142977208	G	A	b38	rs9692804	6e-07	0.16	Cells - Cultured fibroblasts
ENSG00000160932.10	LY6E	chr8	142977239	G	T	b38	rs9692803	6e-07	0.16	Cells - Cultured fibroblasts
ENSG00000160932.10	LY6E	chr8	143027109	G	C	b38	rs7825028	6e-07	-0.31	Esophagus - Mucosa
ENSG00000160932.10	LY6E	chr8	143000987	T	A	b38	rs10441626	6.1e-07	-0.15	Testis
ENSG00000160932.10	LY6E	chr8	142974812	C	A	b38	rs9693263	6.3e-07	0.16	Cells - Cultured fibroblasts
ENSG00000160932.10	LY6E	chr8	142975870	C	T	b38	rs66670423	6.3e-07	0.16	Cells - Cultured fibroblasts
ENSG00000160932.10	LY6E	chr8	142975959	T	C	b38	rs66825108	6.3e-07	0.16	Cells - Cultured fibroblasts
ENSG00000160932.10	LY6E	chr8	142977232	G	C	b38	rs9330405	6.3e-07	0.16	Cells - Cultured fibroblasts
ENSG00000160932.10	LY6E	chr8	142978109	T	C	b38	rs9773043	6.3e-07	0.16	Cells - Cultured fibroblasts
ENSG00000160932.10	LY6E	chr8	142978392	A	ACT	b38	rs111941540	6.3e-07	0.16	Cells - Cultured fibroblasts
ENSG00000160932.10	LY6E	chr8	142976026	C	G	b38	rs71513672	6.4e-07	0.16	Cells - Cultured fibroblasts
ENSG00000160932.10	LY6E	chr8	143030952	T	C	b38	rs4977146	6.5e-07	0.16	Testis
ENSG00000160932.10	LY6E	chr8	143012447	C	T	b38	rs4270938	6.6e-07	-0.15	Adipose - Subcutaneous
ENSG00000160932.10	LY6E	chr8	143015916	C	T	b38	rs62525085	6.6e-07	-0.35	Adrenal Gland
ENSG00000160932.10	LY6E	chr8	143015960	C	G	b38	rs62525087	6.6e-07	-0.35	Adrenal Gland
ENSG00000160932.10	LY6E	chr8	142936763	TAAAC	T	b38	rs201402732	6.7e-07	-0.95	Esophagus - Mucosa
ENSG00000160932.10	LY6E	chr8	142983465	C	T	b38	rs61276460	7.6e-07	-0.16	Cells - Cultured fibroblasts
ENSG00000160932.10	LY6E	chr8	143025099	C	T	b38	rs117702207	8.1e-07	-0.53	Esophagus - Mucosa
ENSG00000160932.10	LY6E	chr8	143029210	T	G	b38	rs6558360	8.1e-07	-0.26	Whole Blood
ENSG00000160932.10	LY6E	chr8	143013213	C	G	b38	rs4272356	8.2e-07	0.19	Brain - Nucleus accumbens (basal ganglia)
ENSG00000160932.10	LY6E	chr8	143027038	G	T	b38	rs7824896	8.5e-07	0.28	Nerve - Tibial
ENSG00000160932.10	LY6E	chr8	143018261	G	A	b38	rs17061979	8.5e-07	0.31	Adipose - Subcutaneous
ENSG00000160932.10	LY6E	chr8	143021330	C	T	b38	rs11547127	8.5e-07	0.31	Adipose - Subcutaneous
ENSG00000160932.10	LY6E	chr8	143033391	G	A	b38	rs139204769	8.6e-07	-0.54	Esophagus - Mucosa
ENSG00000160932.10	LY6E	chr8	143013213	C	G	b38	rs4272356	8.9e-07	-0.14	Adipose - Subcutaneous
ENSG00000160932.10	LY6E	chr8	142974706	A	G	b38	rs9694474	9.2e-07	0.16	Cells - Cultured fibroblasts
ENSG00000160932.10	LY6E	chr8	143001190	A	G	b38	rs62525867	9.3e-07	-0.18	Cells - Cultured fibroblasts
ENSG00000160932.10	LY6E	chr8	143001191	A	C	b38	rs62525079	9.3e-07	-0.18	Cells - Cultured fibroblasts
ENSG00000160932.10	LY6E	chr8	143013459	C	G	b38	rs60094831	9.8e-07	-0.45	Skin - Sun Exposed (Lower leg)
ENSG00000160932.10	LY6E	chr8	142907570	C	G	b38	rs62525983	9.8e-07	-0.16	Cells - Cultured fibroblasts
ENSG00000160932.10	LY6E	chr8	143000987	T	A	b38	rs10441626	9.8e-07	0.3	Liver
ENSG00000160932.10	LY6E	chr8	143012898	G	A	b38	rs4385452	1e-06	0.2	Brain - Nucleus accumbens (basal ganglia)
ENSG00000160932.10	LY6E	chr8	142927933	A	T	b38	rs36187312	1e-06	-0.16	Cells - Cultured fibroblasts
ENSG00000160932.10	LY6E	chr8	142911245	C	T	b38	rs28491316	1.1e-06	-0.16	Cells - Cultured fibroblasts
ENSG00000160932.10	LY6E	chr8	142980219	C	T	b38	rs13251346	1.2e-06	0.16	Cells - Cultured fibroblasts
ENSG00000160932.10	LY6E	chr8	143001802	C	G	b38	rs28863262	1.2e-06	-0.49	Skin - Sun Exposed (Lower leg)
ENSG00000160932.10	LY6E	chr8	142980048	T	C	b38	rs13262741	1.2e-06	0.16	Cells - Cultured fibroblasts
ENSG00000160932.10	LY6E	chr8	143012898	G	A	b38	rs4385452	1.2e-06	-0.33	Adrenal Gland
ENSG00000160932.10	LY6E	chr8	142971151	G	A	b38	rs13260554	1.2e-06	0.16	Cells - Cultured fibroblasts
ENSG00000160932.10	LY6E	chr8	142972878	C	T	b38	rs13269431	1.2e-06	0.16	Cells - Cultured fibroblasts
ENSG00000160932.10	LY6E	chr8	142974452	C	T	b38	rs13275206	1.2e-06	0.16	Cells - Cultured fibroblasts
ENSG00000160932.10	LY6E	chr8	142976179	C	T	b38	rs71513673	1.2e-06	0.16	Cells - Cultured fibroblasts
ENSG00000160932.10	LY6E	chr8	142977839	G	A	b38	rs13279516	1.2e-06	0.16	Cells - Cultured fibroblasts
ENSG00000160932.10	LY6E	chr8	142978084	A	G	b38	rs9772300	1.2e-06	0.16	Cells - Cultured fibroblasts
ENSG00000160932.10	LY6E	chr8	142978085	C	A	b38	rs9774239	1.2e-06	0.16	Cells - Cultured fibroblasts
ENSG00000160932.10	LY6E	chr8	142978201	A	G	b38	rs9772279	1.2e-06	0.16	Cells - Cultured fibroblasts
ENSG00000160932.10	LY6E	chr8	142978396	AT	A	b38	rs35605287	1.2e-06	0.16	Cells - Cultured fibroblasts
ENSG00000160932.10	LY6E	chr8	143105451	G	A	b38	rs10092342	1.3e-06	0.66	Cells - Cultured fibroblasts
ENSG00000160932.10	LY6E	chr8	142978133	G	A	b38	rs9774548	1.3e-06	0.16	Cells - Cultured fibroblasts
ENSG00000160932.10	LY6E	chr8	142837828	C	T	b38	rs4081945	1.4e-06	-0.16	Cells - Cultured fibroblasts
ENSG00000160932.10	LY6E	chr8	143012447	C	T	b38	rs4270938	1.5e-06	-0.22	Pancreas
ENSG00000160932.10	LY6E	chr8	143026785	C	T	b38	rs59912214	1.5e-06	0.26	Adipose - Subcutaneous
ENSG00000160932.10	LY6E	chr8	143089940	C	G	b38	rs7837509	1.5e-06	0.68	Cells - Cultured fibroblasts
ENSG00000160932.10	LY6E	chr8	143021076	C	T	b38	rs11136286	1.5e-06	-0.22	Brain - Nucleus accumbens (basal ganglia)
ENSG00000160932.10	LY6E	chr8	143022525	G	A	b38	rs71513676	1.5e-06	-0.22	Brain - Nucleus accumbens (basal ganglia)
ENSG00000160932.10	LY6E	chr8	143023609	TCCCGGTGTTCGGGC	T	b38	rs147881012	1.5e-06	-0.22	Brain - Nucleus accumbens (basal ganglia)
ENSG00000160932.10	LY6E	chr8	143023925	A	G	b38	rs7823963	1.5e-06	-0.22	Brain - Nucleus accumbens (basal ganglia)
ENSG00000160932.10	LY6E	chr8	143026084	G	A	b38	rs4433125	1.5e-06	-0.22	Brain - Nucleus accumbens (basal ganglia)
ENSG00000160932.10	LY6E	chr8	143027275	C	T	b38	rs11993173	1.5e-06	-0.22	Brain - Nucleus accumbens (basal ganglia)
ENSG00000160932.10	LY6E	chr8	142928349	C	T	b38	rs36176772	1.6e-06	-0.16	Cells - Cultured fibroblasts
ENSG00000160932.10	LY6E	chr8	143026403	GGAGAGGAGGGGCTGCGGTGAA	G	b38	rs146834091	1.6e-06	-0.23	Cells - Cultured fibroblasts
ENSG00000160932.10	LY6E	chr8	143026560	A	G	b38	rs10283236	1.6e-06	-0.2	Breast - Mammary Tissue
ENSG00000160932.10	LY6E	chr8	142968760	G	C	b38	rs13253359	1.7e-06	0.16	Cells - Cultured fibroblasts
ENSG00000160932.10	LY6E	chr8	142969212	C	T	b38	rs9772602	1.7e-06	0.16	Cells - Cultured fibroblasts
ENSG00000160932.10	LY6E	chr8	143013832	G	A	b38	rs7812819	1.7e-06	-0.14	Adipose - Subcutaneous
ENSG00000160932.10	LY6E	chr8	143012447	C	T	b38	rs4270938	1.8e-06	0.31	Liver
ENSG00000160932.10	LY6E	chr8	142939130	G	A	b38	rs148519290	1.8e-06	0.16	Cells - Cultured fibroblasts
ENSG00000160932.10	LY6E	chr8	142941210	C	T	b38	rs141739156	1.8e-06	0.16	Cells - Cultured fibroblasts
ENSG00000160932.10	LY6E	chr8	142937842	A	G	b38	rs150071088	1.9e-06	0.16	Cells - Cultured fibroblasts
ENSG00000160932.10	LY6E	chr8	143022896	T	C	b38	rs4483136	1.9e-06	-0.22	Brain - Nucleus accumbens (basal ganglia)
ENSG00000160932.10	LY6E	chr8	143027275	C	T	b38	rs11993173	1.9e-06	-0.29	Brain - Putamen (basal ganglia)
ENSG00000160932.10	LY6E	chr8	142924657	A	G	b38	rs7016924	1.9e-06	0.16	Cells - Cultured fibroblasts
ENSG00000160932.10	LY6E	chr8	143029037	A	G	b38	rs4977145	1.9e-06	-0.29	Brain - Putamen (basal ganglia)
ENSG00000160932.10	LY6E	chr8	143029421	G	C	b38	rs12543021	1.9e-06	-0.29	Brain - Putamen (basal ganglia)
ENSG00000160932.10	LY6E	chr8	143003115	T	C	b38	rs7004686	2e-06	-0.21	Brain - Nucleus accumbens (basal ganglia)
ENSG00000160932.10	LY6E	chr8	143004254	A	AC	b38	rs71313259	2e-06	-0.21	Brain - Nucleus accumbens (basal ganglia)
ENSG00000160932.10	LY6E	chr8	143005588	C	T	b38	rs13263165	2e-06	-0.21	Brain - Nucleus accumbens (basal ganglia)
ENSG00000160932.10	LY6E	chr8	143008172	C	A	b38	rs4596631	2e-06	-0.21	Brain - Nucleus accumbens (basal ganglia)
ENSG00000160932.10	LY6E	chr8	143008423	T	G	b38	rs4645544	2e-06	-0.21	Brain - Nucleus accumbens (basal ganglia)
ENSG00000160932.10	LY6E	chr8	142914643	A	G	b38	rs6434	2e-06	-0.15	Cells - Cultured fibroblasts
ENSG00000160932.10	LY6E	chr8	143018261	G	A	b38	rs17061979	2.1e-06	0.34	Cells - Cultured fibroblasts
ENSG00000160932.10	LY6E	chr8	143021330	C	T	b38	rs11547127	2.1e-06	0.34	Cells - Cultured fibroblasts
ENSG00000160932.10	LY6E	chr8	143024390	ACTTCCCCG	A	b38	rs145406495	2.1e-06	0.25	Adipose - Subcutaneous
ENSG00000160932.10	LY6E	chr8	143320154	G	C	b38	rs190828250	2.2e-06	1.5	Brain - Anterior cingulate cortex (BA24)
ENSG00000160932.10	LY6E	chr8	142096710	A	T	b38	rs143241675	2.3e-06	1	Brain - Cortex
ENSG00000160932.10	LY6E	chr8	142974454	G	A	b38	rs13282287	2.4e-06	0.15	Cells - Cultured fibroblasts
ENSG00000160932.10	LY6E	chr8	143012511	C	T	b38	rs4270939	2.4e-06	-0.14	Adipose - Subcutaneous
ENSG00000160932.10	LY6E	chr8	143026403	GGAGAGGAGGGGCTGCGGTGAA	G	b38	rs146834091	2.4e-06	-0.23	Esophagus - Muscularis
ENSG00000160932.10	LY6E	chr8	142842475	A	G	b38	rs3819496	2.5e-06	-0.16	Cells - Cultured fibroblasts
ENSG00000160932.10	LY6E	chr8	143024390	ACTTCCCCG	A	b38	rs145406495	2.6e-06	-0.29	Esophagus - Mucosa
ENSG00000160932.10	LY6E	chr8	143002864	T	C	b38	rs13273708	2.6e-06	-0.21	Brain - Nucleus accumbens (basal ganglia)
ENSG00000160932.10	LY6E	chr8	143003041	T	C	b38	rs9792229	2.6e-06	-0.21	Brain - Nucleus accumbens (basal ganglia)
ENSG00000160932.10	LY6E	chr8	143004322	T	C	b38	rs11777509	2.6e-06	-0.21	Brain - Nucleus accumbens (basal ganglia)
ENSG00000160932.10	LY6E	chr8	143006044	G	C	b38	rs11136265	2.6e-06	-0.21	Brain - Nucleus accumbens (basal ganglia)
ENSG00000160932.10	LY6E	chr8	143009541	A	G	b38	rs34102715	2.6e-06	-0.21	Brain - Nucleus accumbens (basal ganglia)
ENSG00000160932.10	LY6E	chr8	143009714	GT	G	b38	rs113368759	2.6e-06	-0.21	Brain - Nucleus accumbens (basal ganglia)
ENSG00000160932.10	LY6E	chr8	143009944	G	C	b38	rs11782082	2.6e-06	-0.21	Brain - Nucleus accumbens (basal ganglia)
ENSG00000160932.10	LY6E	chr8	143009986	A	G	b38	rs11779710	2.6e-06	-0.21	Brain - Nucleus accumbens (basal ganglia)
ENSG00000160932.10	LY6E	chr8	143010029	G	A	b38	rs11782111	2.6e-06	-0.21	Brain - Nucleus accumbens (basal ganglia)
ENSG00000160932.10	LY6E	chr8	143010109	C	T	b38	rs11775990	2.6e-06	-0.21	Brain - Nucleus accumbens (basal ganglia)
ENSG00000160932.10	LY6E	chr8	143010523	C	T	b38	rs73367663	2.6e-06	0.23	Nerve - Tibial
ENSG00000160932.10	LY6E	chr8	143030196	G	A	b38	rs13250459	2.6e-06	-0.3	Brain - Putamen (basal ganglia)
ENSG00000160932.10	LY6E	chr8	143014251	G	A	b38	rs12681773	2.7e-06	-0.14	Adipose - Subcutaneous
ENSG00000160932.10	LY6E	chr8	142916647	T	C	b38	rs7836572	2.7e-06	0.15	Cells - Cultured fibroblasts
ENSG00000160932.10	LY6E	chr8	142904167	C	T	b38	rs6995989	2.8e-06	-0.15	Cells - Cultured fibroblasts
ENSG00000160932.10	LY6E	chr8	143027843	C	T	b38	rs11136290	2.8e-06	0.22	Brain - Nucleus accumbens (basal ganglia)
ENSG00000160932.10	LY6E	chr8	143029276	G	T	b38	rs7005405	2.8e-06	-0.15	Testis
ENSG00000160932.10	LY6E	chr8	142916743	C	G	b38	rs28361356	2.9e-06	-0.15	Cells - Cultured fibroblasts
ENSG00000160932.10	LY6E	chr8	143001190	A	G	b38	rs62525867	2.9e-06	0.32	Liver
ENSG00000160932.10	LY6E	chr8	142999768	C	T	b38	rs6558328	2.9e-06	-0.28	Liver
ENSG00000160932.10	LY6E	chr8	143001191	A	C	b38	rs62525079	3e-06	0.32	Liver
ENSG00000160932.10	LY6E	chr8	142839764	G	A	b38	rs756552	3.1e-06	-0.16	Cells - Cultured fibroblasts
ENSG00000160932.10	LY6E	chr8	143001611	T	A	b38	rs4977141	3.1e-06	-0.15	Nerve - Tibial
ENSG00000160932.10	LY6E	chr8	142170256	G	A	b38	rs11989450	3.1e-06	2.8	Vagina
ENSG00000160932.10	LY6E	chr8	143037471	C	T	b38	rs7817502	3.1e-06	1.4	Vagina
ENSG00000160932.10	LY6E	chr8	143108362	C	T	b38	rs150471461	3.1e-06	2.8	Vagina
ENSG00000160932.10	LY6E	chr8	143486822	G	C	b38	rs867066437	3.1e-06	2.8	Vagina
ENSG00000160932.10	LY6E	chr8	143023156	A	C	b38	rs11787222	3.3e-06	-0.21	Pancreas
ENSG00000160932.10	LY6E	chr8	143009174	C	T	b38	rs28802398	3.4e-06	-0.53	Skin - Sun Exposed (Lower leg)
ENSG00000160932.10	LY6E	chr8	143001193	T	C	b38	rs34568399	3.4e-06	0.32	Liver
ENSG00000160932.10	LY6E	chr8	143009072	C	T	b38	rs28876441	3.4e-06	-0.53	Skin - Sun Exposed (Lower leg)
ENSG00000160932.10	LY6E	chr8	143010208	G	C	b38	rs57621073	3.4e-06	-0.53	Skin - Sun Exposed (Lower leg)
ENSG00000160932.10	LY6E	chr8	142939106	C	T	b38	rs144726095	3.4e-06	0.15	Cells - Cultured fibroblasts
ENSG00000160932.10	LY6E	chr8	143014251	G	A	b38	rs12681773	3.5e-06	0.19	Brain - Nucleus accumbens (basal ganglia)
ENSG00000160932.10	LY6E	chr8	142910442	T	A	b38	rs7463212	3.6e-06	-0.15	Cells - Cultured fibroblasts
ENSG00000160932.10	LY6E	chr8	142910802	A	G	b38	rs3802228	3.6e-06	-0.15	Cells - Cultured fibroblasts
ENSG00000160932.10	LY6E	chr8	142905139	T	C	b38	rs28558934	3.7e-06	-0.15	Cells - Cultured fibroblasts
ENSG00000160932.10	LY6E	chr8	142840388	C	T	b38	rs3750246	3.7e-06	-0.16	Cells - Cultured fibroblasts
ENSG00000160932.10	LY6E	chr8	142916461	C	G	b38	rs7461740	3.8e-06	-0.15	Cells - Cultured fibroblasts
ENSG00000160932.10	LY6E	chr8	142918310	G	A	b38	rs10087214	3.8e-06	-0.15	Cells - Cultured fibroblasts
ENSG00000160932.10	LY6E	chr8	142937658	C	T	b38	rs140435719	3.8e-06	0.15	Cells - Cultured fibroblasts
ENSG00000160932.10	LY6E	chr8	142938251	G	T	b38	rs145847900	3.8e-06	0.15	Cells - Cultured fibroblasts
ENSG00000160932.10	LY6E	chr8	142938274	C	A	b38	rs148202472	3.8e-06	0.15	Cells - Cultured fibroblasts
ENSG00000160932.10	LY6E	chr8	143029506	T	C	b38	rs12549971	3.8e-06	-0.29	Brain - Putamen (basal ganglia)
ENSG00000160932.10	LY6E	chr8	143027109	G	C	b38	rs7825028	3.9e-06	0.25	Adipose - Subcutaneous
ENSG00000160932.10	LY6E	chr8	142909347	A	G	b38	rs6992689	4.1e-06	-0.15	Cells - Cultured fibroblasts
ENSG00000160932.10	LY6E	chr8	142911448	C	A	b38	rs3802230	4.1e-06	-0.15	Cells - Cultured fibroblasts
ENSG00000160932.10	LY6E	chr8	143684741	T	C	b38	rs73371141	4.2e-06	-0.55	Skin - Sun Exposed (Lower leg)
ENSG00000160932.10	LY6E	chr8	143019697	T	C	b38	rs58558679	4.2e-06	0.2	Brain - Nucleus accumbens (basal ganglia)
ENSG00000160932.10	LY6E	chr8	143019620	C	T	b38	rs61695204	4.3e-06	0.21	Brain - Nucleus accumbens (basal ganglia)
ENSG00000160932.10	LY6E	chr8	142915460	T	C	b38	rs28615142	4.3e-06	-0.15	Cells - Cultured fibroblasts
ENSG00000160932.10	LY6E	chr8	142838841	C	T	b38	rs62524968	4.5e-06	-0.16	Cells - Cultured fibroblasts
ENSG00000160932.10	LY6E	chr8	143026551	T	C	b38	rs78918596	4.5e-06	0.26	Whole Blood
ENSG00000160932.10	LY6E	chr8	142999768	C	T	b38	rs6558328	4.5e-06	0.14	Testis
ENSG00000160932.10	LY6E	chr8	142964217	A	G	b38	rs13281368	4.5e-06	0.16	Cells - Cultured fibroblasts
ENSG00000160932.10	LY6E	chr8	143009940	C	G	b38	rs62525082	4.6e-06	0.31	Liver
ENSG00000160932.10	LY6E	chr8	143320154	G	C	b38	rs190828250	4.7e-06	1.6	Brain - Putamen (basal ganglia)
ENSG00000160932.10	LY6E	chr8	143029037	A	G	b38	rs4977145	4.7e-06	-0.22	Brain - Nucleus accumbens (basal ganglia)
ENSG00000160932.10	LY6E	chr8	143029421	G	C	b38	rs12543021	4.7e-06	-0.22	Brain - Nucleus accumbens (basal ganglia)
ENSG00000160932.10	LY6E	chr8	143015916	C	T	b38	rs62525085	4.7e-06	-0.21	Pancreas
ENSG00000160932.10	LY6E	chr8	143015960	C	G	b38	rs62525087	4.7e-06	-0.21	Pancreas
ENSG00000160932.10	LY6E	chr8	143013213	C	G	b38	rs4272356	4.9e-06	-0.13	Adipose - Visceral (Omentum)
ENSG00000160932.10	LY6E	chr8	143374930	A	G	b38	rs57303642	4.9e-06	0.49	Esophagus - Mucosa
ENSG00000160932.10	LY6E	chr8	143013722	GCCCAGCCTGCCCCGTCCCGC	G	b38	rs144124007	4.9e-06	0.28	Adipose - Subcutaneous
ENSG00000160932.10	LY6E	chr8	143029276	G	T	b38	rs7005405	4.9e-06	0.21	Brain - Nucleus accumbens (basal ganglia)
ENSG00000160932.10	LY6E	chr8	142915436	A	G	b38	rs28366703	5e-06	-0.15	Cells - Cultured fibroblasts
ENSG00000160932.10	LY6E	chr8	143027260	A	AC	b38	rs11378733	5e-06	0.24	Adipose - Subcutaneous
ENSG00000160932.10	LY6E	chr8	142834863	G	C	b38	rs60783500	5e-06	-0.15	Cells - Cultured fibroblasts
ENSG00000160932.10	LY6E	chr8	142988304	G	A	b38	rs35899216	5.1e-06	-0.32	Liver
ENSG00000160932.10	LY6E	chr8	143012998	C	T	b38	rs58273647	5.1e-06	-0.42	Skin - Sun Exposed (Lower leg)
ENSG00000160932.10	LY6E	chr8	143010799	G	A	b38	rs7832588	5.3e-06	-0.2	Brain - Nucleus accumbens (basal ganglia)
ENSG00000160932.10	LY6E	chr8	143001193	T	C	b38	rs34568399	5.4e-06	-0.17	Cells - Cultured fibroblasts
ENSG00000160932.10	LY6E	chr8	143012898	G	A	b38	rs4385452	5.7e-06	0.3	Liver
ENSG00000160932.10	LY6E	chr8	142836523	A	C	b38	rs2299610	6.1e-06	-0.15	Cells - Cultured fibroblasts
ENSG00000160932.10	LY6E	chr8	142836543	G	A	b38	rs2299611	6.1e-06	-0.15	Cells - Cultured fibroblasts
ENSG00000160932.10	LY6E	chr8	143003992	C	G	b38	rs28827930	6.1e-06	0.13	Whole Blood
ENSG00000160932.10	LY6E	chr8	143003992	C	G	b38	rs28827930	6.2e-06	0.22	Nerve - Tibial
ENSG00000160932.10	LY6E	chr8	143001611	T	A	b38	rs4977141	6.2e-06	0.29	Liver
ENSG00000160932.10	LY6E	chr8	142991622	C	T	b38	rs28398942	6.2e-06	0.2	Esophagus - Gastroesophageal Junction
ENSG00000160932.10	LY6E	chr8	142991686	G	A	b38	rs28693770	6.2e-06	0.2	Esophagus - Gastroesophageal Junction
ENSG00000160932.10	LY6E	chr8	142916672	C	T	b38	rs12679242	6.2e-06	-0.15	Cells - Cultured fibroblasts
ENSG00000160932.10	LY6E	chr8	142918184	A	G	b38	rs1799998	6.2e-06	-0.15	Cells - Cultured fibroblasts
ENSG00000160932.10	LY6E	chr8	142918503	T	A	b38	rs28659182	6.2e-06	-0.15	Cells - Cultured fibroblasts
ENSG00000160932.10	LY6E	chr8	142919311	C	T	b38	rs62524560	6.2e-06	-0.15	Cells - Cultured fibroblasts
ENSG00000160932.10	LY6E	chr8	142920867	G	T	b38	rs7831617	6.2e-06	-0.15	Cells - Cultured fibroblasts
ENSG00000160932.10	LY6E	chr8	142826231	A	G	b38	rs2717596	6.3e-06	-0.15	Cells - Cultured fibroblasts
ENSG00000160932.10	LY6E	chr8	143294973	C	T	b38	rs79170851	6.3e-06	1.2	Vagina
ENSG00000160932.10	LY6E	chr8	143376354	G	A	b38	rs114969004	6.3e-06	1.2	Vagina
ENSG00000160932.10	LY6E	chr8	143018261	G	A	b38	rs17061979	6.4e-06	0.19	Whole Blood
ENSG00000160932.10	LY6E	chr8	143021330	C	T	b38	rs11547127	6.4e-06	0.19	Whole Blood
ENSG00000160932.10	LY6E	chr8	142963481	T	C	b38	rs9771788	6.4e-06	0.15	Cells - Cultured fibroblasts
ENSG00000160932.10	LY6E	chr8	143013741	G	A	b38	rs371698004	6.5e-06	-0.44	Skin - Sun Exposed (Lower leg)
ENSG00000160932.10	LY6E	chr8	143027581	C	T	b38	rs13271122	6.5e-06	0.25	Cells - Cultured fibroblasts
ENSG00000160932.10	LY6E	chr8	142937934	C	T	b38	rs145402774	6.6e-06	0.15	Cells - Cultured fibroblasts
ENSG00000160932.10	LY6E	chr8	143026785	C	T	b38	rs59912214	6.6e-06	-0.28	Esophagus - Mucosa
ENSG00000160932.10	LY6E	chr8	143013832	G	A	b38	rs7812819	6.9e-06	-0.21	Pancreas
ENSG00000160932.10	LY6E	chr8	143013213	C	G	b38	rs4272356	6.9e-06	-0.21	Pancreas
ENSG00000160932.10	LY6E	chr8	143000987	T	A	b38	rs10441626	7.2e-06	0.19	Brain - Nucleus accumbens (basal ganglia)
ENSG00000160932.10	LY6E	chr8	143008821	C	A	b38	rs7462015	7.7e-06	0.2	Brain - Nucleus accumbens (basal ganglia)
ENSG00000160932.10	LY6E	chr8	143009271	C	T	b38	rs62525080	7.7e-06	0.2	Brain - Nucleus accumbens (basal ganglia)
ENSG00000160932.10	LY6E	chr8	143027843	C	T	b38	rs11136290	7.8e-06	-0.14	Testis
ENSG00000160932.10	LY6E	chr8	142921722	G	C	b38	rs9643358	8.1e-06	-0.15	Cells - Cultured fibroblasts
ENSG00000160932.10	LY6E	chr8	143010523	C	T	b38	rs73367663	8.2e-06	0.13	Whole Blood
ENSG00000160932.10	LY6E	chr8	143032605	C	T	b38	rs11984715	8.2e-06	-0.29	Brain - Putamen (basal ganglia)
ENSG00000160932.10	LY6E	chr8	142837506	G	A	b38	rs1808768	8.4e-06	-0.15	Cells - Cultured fibroblasts
ENSG00000160932.10	LY6E	chr8	142463779	T	C	b38	rs73372298	8.7e-06	1.9	Vagina
ENSG00000160932.10	LY6E	chr8	143021076	C	T	b38	rs11136286	8.7e-06	-0.27	Brain - Putamen (basal ganglia)
ENSG00000160932.10	LY6E	chr8	143022525	G	A	b38	rs71513676	8.7e-06	-0.27	Brain - Putamen (basal ganglia)
ENSG00000160932.10	LY6E	chr8	143023609	TCCCGGTGTTCGGGC	T	b38	rs147881012	8.7e-06	-0.27	Brain - Putamen (basal ganglia)
ENSG00000160932.10	LY6E	chr8	143023925	A	G	b38	rs7823963	8.7e-06	-0.27	Brain - Putamen (basal ganglia)
ENSG00000160932.10	LY6E	chr8	143026084	G	A	b38	rs4433125	8.7e-06	-0.27	Brain - Putamen (basal ganglia)
ENSG00000160932.10	LY6E	chr8	143017718	G	C	b38	rs13252864	8.8e-06	-0.35	Esophagus - Mucosa
ENSG00000160932.10	LY6E	chr8	142824070	C	T	b38	rs2717593	9.3e-06	-0.14	Cells - Cultured fibroblasts
ENSG00000160932.10	LY6E	chr8	142914578	C	T	b38	rs10110732	9.3e-06	0.15	Cells - Cultured fibroblasts
ENSG00000160932.10	LY6E	chr8	142911899	C	T	b38	rs3097	9.4e-06	0.17	Cells - Cultured fibroblasts
ENSG00000160932.10	LY6E	chr8	143879850	G	A	b38	rs145642866	9.6e-06	0.92	Brain - Hypothalamus
ENSG00000160932.10	LY6E	chr8	143027843	C	T	b38	rs11136290	9.8e-06	0.26	Brain - Putamen (basal ganglia)
ENSG00000160932.10	LY6E	chr8	143013213	C	G	b38	rs4272356	9.9e-06	-0.16	Esophagus - Muscularis
ENSG00000160932.10	LY6E	chr8	143237540	G	A	b38	rs117625231	9.9e-06	0.45	Brain - Anterior cingulate cortex (BA24)
ENSG00000160932.10	LY6E	chr8	143009940	C	G	b38	rs62525082	9.9e-06	0.18	Brain - Nucleus accumbens (basal ganglia)
ENSG00000160932.10	LY6E	chr8	142999768	C	T	b38	rs6558328	1e-05	-0.18	Brain - Nucleus accumbens (basal ganglia)
ENSG00000160932.10	LY6E	chr8	142921791	G	A	b38	rs28571827	1.1e-05	-0.14	Cells - Cultured fibroblasts
ENSG00000160932.10	LY6E	chr8	142949605	A	G	b38	rs4132142	1.1e-05	0.15	Cells - Cultured fibroblasts
ENSG00000160932.10	LY6E	chr8	142951080	C	T	b38	rs36164276	1.1e-05	0.15	Cells - Cultured fibroblasts
ENSG00000160932.10	LY6E	chr8	142952979	G	C	b38	rs137943159	1.1e-05	0.15	Cells - Cultured fibroblasts
ENSG00000160932.10	LY6E	chr8	143024892	G	A	b38	rs13439114	1.1e-05	-0.2	Pancreas
ENSG00000160932.10	LY6E	chr8	143666423	C	CTGCGTGCCCCTCCCTCCTCTGTGTGCACACACATCCCATGCTGTGTCCA	b38		1.1e-05	1.1	Brain - Anterior cingulate cortex (BA24)
ENSG00000160932.10	LY6E	chr8	143013378	G	GA	b38	rs140891896	1.1e-05	-0.43	Skin - Sun Exposed (Lower leg)
ENSG00000160932.10	LY6E	chr8	143018292	C	A	b38	rs114909654	1.1e-05	-0.43	Skin - Sun Exposed (Lower leg)
ENSG00000160932.10	LY6E	chr8	142991622	C	T	b38	rs28398942	1.1e-05	0.13	Adipose - Subcutaneous
ENSG00000160932.10	LY6E	chr8	142991686	G	A	b38	rs28693770	1.1e-05	0.13	Adipose - Subcutaneous
ENSG00000160932.10	LY6E	chr8	142877264	G	A	b38	rs61751146	1.2e-05	-0.47	Esophagus - Mucosa
ENSG00000160932.10	LY6E	chr8	143008821	C	A	b38	rs7462015	1.2e-05	-0.3	Adrenal Gland
ENSG00000160932.10	LY6E	chr8	143029276	G	T	b38	rs7005405	1.2e-05	0.26	Brain - Putamen (basal ganglia)
ENSG00000160932.10	LY6E	chr8	142545451	C	G	b38	rs111319156	1.2e-05	-0.63	Esophagus - Mucosa
ENSG00000160932.10	LY6E	chr8	143360944	G	T	b38	rs34506611	1.2e-05	-0.6	Esophagus - Mucosa
ENSG00000160932.10	LY6E	chr8	142545289	C	T	b38	rs28545743	1.3e-05	-0.61	Esophagus - Mucosa
ENSG00000160932.10	LY6E	chr8	142545428	G	A	b38	rs73374168	1.3e-05	-0.61	Esophagus - Mucosa
ENSG00000160932.10	LY6E	chr8	142545474	C	T	b38	rs73374169	1.3e-05	-0.61	Esophagus - Mucosa
ENSG00000160932.10	LY6E	chr8	142953076	T	G	b38	rs150601577	1.3e-05	0.15	Cells - Cultured fibroblasts
ENSG00000160932.10	LY6E	chr8	142953077	T	C	b38	rs138648382	1.3e-05	0.15	Cells - Cultured fibroblasts
ENSG00000160932.10	LY6E	chr8	143131543	G	A	b38	rs28719911	1.3e-05	0.59	Cells - Cultured fibroblasts
ENSG00000160932.10	LY6E	chr8	142905020	T	A	b38	rs28459852	1.3e-05	-0.14	Cells - Cultured fibroblasts
ENSG00000160932.10	LY6E	chr8	142835362	G	A	b38	rs7829926	1.3e-05	-0.15	Cells - Cultured fibroblasts
ENSG00000160932.10	LY6E	chr8	143027260	A	AC	b38	rs11378733	1.3e-05	0.24	Breast - Mammary Tissue
ENSG00000160932.10	LY6E	chr8	143013832	G	A	b38	rs7812819	1.4e-05	-0.12	Adipose - Visceral (Omentum)
ENSG00000160932.10	LY6E	chr8	143388554	A	T	b38	rs116587054	1.4e-05	-0.67	Esophagus - Mucosa
ENSG00000160932.10	LY6E	chr8	143015916	C	T	b38	rs62525085	1.4e-05	-0.15	Esophagus - Muscularis
ENSG00000160932.10	LY6E	chr8	143015960	C	G	b38	rs62525087	1.4e-05	-0.15	Esophagus - Muscularis
ENSG00000160932.10	LY6E	chr8	143026560	A	G	b38	rs10283236	1.5e-05	-0.21	Cells - Cultured fibroblasts
ENSG00000160932.10	LY6E	chr8	143015916	C	T	b38	rs62525085	1.5e-05	-0.12	Adipose - Visceral (Omentum)
ENSG00000160932.10	LY6E	chr8	143015960	C	G	b38	rs62525087	1.5e-05	-0.12	Adipose - Visceral (Omentum)
ENSG00000160932.10	LY6E	chr8	142984100	T	C	b38	rs10085965	1.5e-05	-0.27	Liver
ENSG00000160932.10	LY6E	chr8	142912975	G	C	b38	rs79410128	1.5e-05	-0.14	Cells - Cultured fibroblasts
ENSG00000160932.10	LY6E	chr8	142912980	A	T	b38	rs79201878	1.5e-05	-0.14	Cells - Cultured fibroblasts
ENSG00000160932.10	LY6E	chr8	142912982	A	G	b38	rs80062072	1.5e-05	-0.14	Cells - Cultured fibroblasts
ENSG00000160932.10	LY6E	chr8	142912983	T	C	b38	rs74838461	1.5e-05	-0.14	Cells - Cultured fibroblasts
ENSG00000160932.10	LY6E	chr8	143685759	C	G	b38	rs112799292	1.5e-05	-0.47	Skin - Sun Exposed (Lower leg)
ENSG00000160932.10	LY6E	chr8	143013722	GCCCAGCCTGCCCCGTCCCGC	G	b38	rs144124007	1.5e-05	0.29	Cells - Cultured fibroblasts
ENSG00000160932.10	LY6E	chr8	142841372	C	T	b38	rs3802226	1.5e-05	-0.15	Cells - Cultured fibroblasts
ENSG00000160932.10	LY6E	chr8	142242023	T	C	b38	rs4599929	1.5e-05	0.61	Muscle - Skeletal
ENSG00000160932.10	LY6E	chr8	143010573	A	G	b38	rs59952573	1.5e-05	-0.54	Skin - Sun Exposed (Lower leg)
ENSG00000160932.10	LY6E	chr8	142942002	A	G	b38	rs140691060	1.5e-05	0.15	Cells - Cultured fibroblasts
ENSG00000160932.10	LY6E	chr8	142985820	C	T	b38	rs13263729	1.6e-05	-0.29	Liver
ENSG00000160932.10	LY6E	chr8	143029506	T	C	b38	rs12549971	1.6e-05	-0.2	Brain - Nucleus accumbens (basal ganglia)
ENSG00000160932.10	LY6E	chr8	143030196	G	A	b38	rs13250459	1.6e-05	-0.2	Brain - Nucleus accumbens (basal ganglia)
ENSG00000160932.10	LY6E	chr8	142932629	A	AGAAAAGTTT	b38	rs200655985	1.6e-05	0.14	Cells - Cultured fibroblasts
ENSG00000160932.10	LY6E	chr8	142083541	G	A	b38	rs73714077	1.6e-05	-0.48	Esophagus - Mucosa
ENSG00000160932.10	LY6E	chr8	142842636	G	A	b38	rs3819497	1.6e-05	-0.14	Cells - Cultured fibroblasts
ENSG00000160932.10	LY6E	chr8	142830428	C	CT	b38	rs57041928	1.6e-05	-0.14	Cells - Cultured fibroblasts
ENSG00000160932.10	LY6E	chr8	143006677	T	C	b38	rs60252207	1.7e-05	-0.52	Skin - Sun Exposed (Lower leg)
ENSG00000160932.10	LY6E	chr8	143011013	C	T	b38	rs4130872	1.7e-05	-0.48	Skin - Sun Exposed (Lower leg)
ENSG00000160932.10	LY6E	chr8	143017718	G	C	b38	rs13252864	1.7e-05	-0.32	Nerve - Tibial
ENSG00000160932.10	LY6E	chr8	143022018	C	T	b38	rs4464948	1.7e-05	-0.32	Esophagus - Mucosa
ENSG00000160932.10	LY6E	chr8	142939084	T	C	b38	rs143728108	1.7e-05	0.18	Brain - Nucleus accumbens (basal ganglia)
ENSG00000160932.10	LY6E	chr8	142176920	C	G	b38	rs79033803	1.8e-05	0.61	Esophagus - Muscularis
ENSG00000160932.10	LY6E	chr8	142957314	G	A	b38	rs9772770	1.8e-05	0.14	Cells - Cultured fibroblasts
ENSG00000160932.10	LY6E	chr8	142829176	T	G	b38	rs2572895	1.8e-05	-0.14	Cells - Cultured fibroblasts
ENSG00000160932.10	LY6E	chr8	142915123	T	C	b38	rs4539	1.8e-05	-0.14	Cells - Cultured fibroblasts
ENSG00000160932.10	LY6E	chr8	142915137	G	A	b38	rs4546	1.8e-05	-0.14	Cells - Cultured fibroblasts
ENSG00000160932.10	LY6E	chr8	142995306	AG	A	b38	rs35679135	1.8e-05	-0.29	Liver
ENSG00000160932.10	LY6E	chr8	143022896	T	C	b38	rs4483136	1.8e-05	-0.26	Brain - Putamen (basal ganglia)
ENSG00000160932.10	LY6E	chr8	143678418	G	A	b38	rs112090167	1.8e-05	-0.41	Esophagus - Mucosa
ENSG00000160932.10	LY6E	chr8	142985559	A	G	b38	rs28662431	1.9e-05	0.24	Cells - Cultured fibroblasts
ENSG00000160932.10	LY6E	chr8	142957206	A	G	b38	rs9773816	1.9e-05	0.14	Cells - Cultured fibroblasts
ENSG00000160932.10	LY6E	chr8	143024892	G	A	b38	rs13439114	1.9e-05	-0.12	Adipose - Subcutaneous
ENSG00000160932.10	LY6E	chr8	143016036	A	G	b38	rs13279735	1.9e-05	0.14	Nerve - Tibial
ENSG00000160932.10	LY6E	chr8	142915999	T	C	b38	rs4072020	2e-05	-0.14	Cells - Cultured fibroblasts
ENSG00000160932.10	LY6E	chr8	143012733	C	T	b38	rs4270940	2e-05	-0.15	Thyroid
ENSG00000160932.10	LY6E	chr8	142912972	G	C	b38	rs6429	2e-05	-0.14	Cells - Cultured fibroblasts
ENSG00000160932.10	LY6E	chr8	142829083	A	G	b38	rs10099325	2e-05	-0.14	Cells - Cultured fibroblasts
ENSG00000160932.10	LY6E	chr8	142824280	C	G	b38	rs2717594	2e-05	-0.14	Cells - Cultured fibroblasts
ENSG00000160932.10	LY6E	chr8	142824565	C	T	b38	rs35577476	2e-05	-0.14	Cells - Cultured fibroblasts
ENSG00000160932.10	LY6E	chr8	142824738	C	T	b38	rs2585171	2e-05	-0.14	Cells - Cultured fibroblasts
ENSG00000160932.10	LY6E	chr8	142824805	A	T	b38	rs2585170	2e-05	-0.14	Cells - Cultured fibroblasts
ENSG00000160932.10	LY6E	chr8	142824980	C	T	b38	rs2003045	2e-05	-0.14	Cells - Cultured fibroblasts
ENSG00000160932.10	LY6E	chr8	142825266	A	G	b38	rs1108668	2e-05	-0.14	Cells - Cultured fibroblasts
ENSG00000160932.10	LY6E	chr8	142825472	T	C	b38	rs2572891	2e-05	-0.14	Cells - Cultured fibroblasts
ENSG00000160932.10	LY6E	chr8	142826995	C	T	b38	rs75087788	2e-05	-0.14	Cells - Cultured fibroblasts
ENSG00000160932.10	LY6E	chr8	142828002	AT	A	b38	rs35633191	2e-05	-0.14	Cells - Cultured fibroblasts
ENSG00000160932.10	LY6E	chr8	143110071	A	G	b38	rs10107410	2e-05	0.52	Cells - Cultured fibroblasts
ENSG00000160932.10	LY6E	chr8	143010523	C	T	b38	rs73367663	2.1e-05	0.21	Adipose - Subcutaneous
ENSG00000160932.10	LY6E	chr8	143026560	A	G	b38	rs10283236	2.1e-05	-0.18	Adipose - Subcutaneous
ENSG00000160932.10	LY6E	chr8	142997856	G	A	b38	rs67922122	2.1e-05	0.24	Cells - Cultured fibroblasts
ENSG00000160932.10	LY6E	chr8	143019620	C	T	b38	rs61695204	2.1e-05	-0.14	Testis
ENSG00000160932.10	LY6E	chr8	143634863	C	T	b38	rs56994129	2.2e-05	-0.53	Esophagus - Mucosa
ENSG00000160932.10	LY6E	chr8	143000987	T	A	b38	rs10441626	2.2e-05	-0.3	Adrenal Gland
ENSG00000160932.10	LY6E	chr8	143032605	C	T	b38	rs11984715	2.2e-05	-0.2	Brain - Nucleus accumbens (basal ganglia)
ENSG00000160932.10	LY6E	chr8	142926765	T	C	b38	rs11775009	2.2e-05	0.14	Cells - Cultured fibroblasts
ENSG00000160932.10	LY6E	chr8	142942340	A	G	b38	rs140211487	2.2e-05	-0.18	Brain - Nucleus accumbens (basal ganglia)
ENSG00000160932.10	LY6E	chr8	142956083	A	G	b38	rs9694672	2.3e-05	0.14	Cells - Cultured fibroblasts
ENSG00000160932.10	LY6E	chr8	143009940	C	G	b38	rs62525082	2.3e-05	-0.31	Adrenal Gland
ENSG00000160932.10	LY6E	chr8	143027038	G	T	b38	rs7824896	2.4e-05	0.23	Adipose - Subcutaneous
ENSG00000160932.10	LY6E	chr8	142914565	G	A	b38	rs28531895	2.5e-05	0.14	Cells - Cultured fibroblasts
ENSG00000160932.10	LY6E	chr8	143388554	A	T	b38	rs116587054	2.5e-05	-0.49	Skin - Sun Exposed (Lower leg)
ENSG00000160932.10	LY6E	chr8	143024892	G	A	b38	rs13439114	2.5e-05	-0.17	Esophagus - Gastroesophageal Junction
ENSG00000160932.10	LY6E	chr8	142832532	A	G	b38	rs34192968	2.6e-05	-0.14	Cells - Cultured fibroblasts
ENSG00000160932.10	LY6E	chr8	142832535	C	G	b38	rs62524960	2.6e-05	-0.14	Cells - Cultured fibroblasts
ENSG00000160932.10	LY6E	chr8	142832536	A	G	b38	rs62524961	2.6e-05	-0.14	Cells - Cultured fibroblasts
ENSG00000160932.10	LY6E	chr8	142833781	A	G	b38	rs4636185	2.6e-05	-0.14	Cells - Cultured fibroblasts
ENSG00000160932.10	LY6E	chr8	142922501	TC	T	b38	rs10717492	2.6e-05	-0.14	Cells - Cultured fibroblasts
ENSG00000160932.10	LY6E	chr8	143032183	G	A	b38	rs7814982	2.6e-05	-0.21	Whole Blood
ENSG00000160932.10	LY6E	chr8	143027109	G	C	b38	rs7825028	2.6e-05	0.24	Breast - Mammary Tissue
ENSG00000160932.10	LY6E	chr8	142942339	A	G	b38	rs151078229	2.6e-05	0.14	Cells - Cultured fibroblasts
ENSG00000160932.10	LY6E	chr8	143015916	C	T	b38	rs62525085	2.6e-05	-0.15	Thyroid
ENSG00000160932.10	LY6E	chr8	143015960	C	G	b38	rs62525087	2.6e-05	-0.15	Thyroid
ENSG00000160932.10	LY6E	chr8	142913528	T	G	b38	rs13252628	2.6e-05	0.14	Cells - Cultured fibroblasts
ENSG00000160932.10	LY6E	chr8	143009940	C	G	b38	rs62525082	2.6e-05	-0.13	Adipose - Subcutaneous
ENSG00000160932.10	LY6E	chr8	142954082	G	A	b38	rs28469769	2.7e-05	0.18	Brain - Nucleus accumbens (basal ganglia)
ENSG00000160932.10	LY6E	chr8	143010799	G	A	b38	rs7832588	2.7e-05	0.3	Adrenal Gland
ENSG00000160932.10	LY6E	chr8	142925688	T	C	b38	rs6988985	2.7e-05	-0.14	Cells - Cultured fibroblasts
ENSG00000160932.10	LY6E	chr8	143003992	C	G	b38	rs28827930	2.7e-05	0.21	Adipose - Subcutaneous
ENSG00000160932.10	LY6E	chr8	143012898	G	A	b38	rs4385452	2.7e-05	-0.15	Esophagus - Muscularis
ENSG00000160932.10	LY6E	chr8	142991622	C	T	b38	rs28398942	2.7e-05	0.16	Esophagus - Muscularis
ENSG00000160932.10	LY6E	chr8	142991686	G	A	b38	rs28693770	2.7e-05	0.16	Esophagus - Muscularis
ENSG00000160932.10	LY6E	chr8	143014251	G	A	b38	rs12681773	2.8e-05	-0.2	Pancreas
ENSG00000160932.10	LY6E	chr8	142939084	T	C	b38	rs143728108	2.8e-05	-0.14	Cells - Cultured fibroblasts
ENSG00000160932.10	LY6E	chr8	142932629	A	AGAAAAGTTT	b38	rs200655985	2.8e-05	-0.18	Brain - Nucleus accumbens (basal ganglia)
ENSG00000160932.10	LY6E	chr8	142084189	A	G	b38	rs58722664	2.8e-05	-0.46	Esophagus - Mucosa
ENSG00000160932.10	LY6E	chr8	142876563	A	C	b38	rs10956991	2.8e-05	-0.14	Cells - Cultured fibroblasts
ENSG00000160932.10	LY6E	chr8	142934070	C	T	b38	rs138478606	2.8e-05	0.14	Cells - Cultured fibroblasts
ENSG00000160932.10	LY6E	chr8	142934246	T	C	b38	rs140114612	2.8e-05	0.14	Cells - Cultured fibroblasts
ENSG00000160932.10	LY6E	chr8	142985663	G	A	b38	rs13248022	2.8e-05	-0.25	Liver
ENSG00000160932.10	LY6E	chr8	142833810	C	T	b38	rs4314631	2.9e-05	-0.14	Cells - Cultured fibroblasts
ENSG00000160932.10	LY6E	chr8	143389317	G	A	b38	rs114090442	2.9e-05	-0.67	Esophagus - Mucosa
ENSG00000160932.10	LY6E	chr8	143010749	A	G	b38	rs7820624	2.9e-05	-0.18	Brain - Nucleus accumbens (basal ganglia)
ENSG00000160932.10	LY6E	chr8	143009271	C	T	b38	rs62525080	2.9e-05	-0.29	Adrenal Gland
ENSG00000160932.10	LY6E	chr8	142919490	A	G	b38	rs13268025	2.9e-05	0.14	Cells - Cultured fibroblasts
ENSG00000160932.10	LY6E	chr8	142919506	C	G	b38	rs13254375	2.9e-05	0.14	Cells - Cultured fibroblasts
ENSG00000160932.10	LY6E	chr8	143112482	A	G	b38	rs3923823	2.9e-05	0.53	Cells - Cultured fibroblasts
ENSG00000160932.10	LY6E	chr8	143120208	T	G	b38	rs13439646	2.9e-05	0.53	Cells - Cultured fibroblasts
ENSG00000160932.10	LY6E	chr8	142919352	G	A	b38	rs62524561	2.9e-05	-0.13	Cells - Cultured fibroblasts
ENSG00000160932.10	LY6E	chr8	142953398	G	A	b38	rs149314731	3e-05	0.14	Cells - Cultured fibroblasts
ENSG00000160932.10	LY6E	chr8	142382873	C	T	b38	rs76941099	3e-05	-1	Liver
ENSG00000160932.10	LY6E	chr8	143023156	A	C	b38	rs11787222	3.1e-05	-0.15	Esophagus - Muscularis
ENSG00000160932.10	LY6E	chr8	143024360	C	T	b38	rs61408559	3.1e-05	-0.4	Skin - Sun Exposed (Lower leg)
ENSG00000160932.10	LY6E	chr8	143002864	T	C	b38	rs13273708	3.2e-05	0.3	Adrenal Gland
ENSG00000160932.10	LY6E	chr8	143003041	T	C	b38	rs9792229	3.2e-05	0.3	Adrenal Gland
ENSG00000160932.10	LY6E	chr8	143004322	T	C	b38	rs11777509	3.2e-05	0.3	Adrenal Gland
ENSG00000160932.10	LY6E	chr8	143006044	G	C	b38	rs11136265	3.2e-05	0.3	Adrenal Gland
ENSG00000160932.10	LY6E	chr8	143009541	A	G	b38	rs34102715	3.2e-05	0.3	Adrenal Gland
ENSG00000160932.10	LY6E	chr8	143009714	GT	G	b38	rs113368759	3.2e-05	0.3	Adrenal Gland
ENSG00000160932.10	LY6E	chr8	143009944	G	C	b38	rs11782082	3.2e-05	0.3	Adrenal Gland
ENSG00000160932.10	LY6E	chr8	143009986	A	G	b38	rs11779710	3.2e-05	0.3	Adrenal Gland
ENSG00000160932.10	LY6E	chr8	143010029	G	A	b38	rs11782111	3.2e-05	0.3	Adrenal Gland
ENSG00000160932.10	LY6E	chr8	143010109	C	T	b38	rs11775990	3.2e-05	0.3	Adrenal Gland
ENSG00000160932.10	LY6E	chr8	142938855	C	T	b38	rs138088171	3.2e-05	-0.29	Adrenal Gland
ENSG00000160932.10	LY6E	chr8	142936053	C	T	b38	rs145183312	3.2e-05	0.14	Cells - Cultured fibroblasts
ENSG00000160932.10	LY6E	chr8	143752043	G	A	b38	rs147797560	3.3e-05	-0.53	Esophagus - Mucosa
ENSG00000160932.10	LY6E	chr8	142924657	A	G	b38	rs7016924	3.3e-05	-0.17	Brain - Nucleus accumbens (basal ganglia)
ENSG00000160932.10	LY6E	chr8	143003115	T	C	b38	rs7004686	3.3e-05	0.2	Pancreas
ENSG00000160932.10	LY6E	chr8	143011760	G	A	b38	rs113739887	3.3e-05	-0.24	Cells - Cultured fibroblasts
ENSG00000160932.10	LY6E	chr8	143024892	G	A	b38	rs13439114	3.4e-05	-0.14	Esophagus - Muscularis
ENSG00000160932.10	LY6E	chr8	143012599	A	G	b38	rs4401834	3.4e-05	-0.15	Thyroid
ENSG00000160932.10	LY6E	chr8	142827402	C	T	b38	rs4276672	3.4e-05	-0.14	Cells - Cultured fibroblasts
ENSG00000160932.10	LY6E	chr8	142934633	G	A	b38	rs145437862	3.5e-05	0.14	Cells - Cultured fibroblasts
ENSG00000160932.10	LY6E	chr8	142934746	G	A	b38	rs36173618	3.5e-05	0.14	Cells - Cultured fibroblasts
ENSG00000160932.10	LY6E	chr8	143042485	G	A	b38	rs148640960	3.6e-05	-0.65	Esophagus - Mucosa
ENSG00000160932.10	LY6E	chr8	142934070	C	T	b38	rs138478606	3.6e-05	-0.17	Brain - Nucleus accumbens (basal ganglia)
ENSG00000160932.10	LY6E	chr8	142934246	T	C	b38	rs140114612	3.6e-05	-0.17	Brain - Nucleus accumbens (basal ganglia)
ENSG00000160932.10	LY6E	chr8	142978276	T	C	b38	rs28481421	3.6e-05	0.17	Brain - Nucleus accumbens (basal ganglia)
ENSG00000160932.10	LY6E	chr8	142085271	C	A	b38	rs56213925	3.6e-05	-0.44	Esophagus - Mucosa
ENSG00000160932.10	LY6E	chr8	142929352	G	A	b38	rs36142026	3.6e-05	0.14	Cells - Cultured fibroblasts
ENSG00000160932.10	LY6E	chr8	142931529	C	T	b38	rs146672302	3.6e-05	0.14	Cells - Cultured fibroblasts
ENSG00000160932.10	LY6E	chr8	142973592	G	T	b38	rs56895348	3.6e-05	-0.45	Skin - Sun Exposed (Lower leg)
ENSG00000160932.10	LY6E	chr8	143016036	A	G	b38	rs13279735	3.7e-05	0.29	Adrenal Gland
ENSG00000160932.10	LY6E	chr8	142844193	C	T	b38	rs7826809	3.7e-05	-0.13	Cells - Cultured fibroblasts
ENSG00000160932.10	LY6E	chr8	142845511	G	T	b38	rs3753122	3.7e-05	-0.13	Cells - Cultured fibroblasts
ENSG00000160932.10	LY6E	chr8	142850309	G	A	b38	rs7013780	3.7e-05	-0.13	Cells - Cultured fibroblasts
ENSG00000160932.10	LY6E	chr8	142861186	A	G	b38	rs57268571	3.7e-05	-0.13	Cells - Cultured fibroblasts
ENSG00000160932.10	LY6E	chr8	142862722	G	A	b38	rs4418320	3.7e-05	-0.13	Cells - Cultured fibroblasts
ENSG00000160932.10	LY6E	chr8	142873857	T	C	b38	rs5301	3.7e-05	-0.13	Cells - Cultured fibroblasts
ENSG00000160932.10	LY6E	chr8	142827605	G	A	b38	rs4400358	3.7e-05	-0.14	Cells - Cultured fibroblasts
ENSG00000160932.10	LY6E	chr8	142827852	C	T	b38	rs4344051	3.7e-05	-0.14	Cells - Cultured fibroblasts
ENSG00000160932.10	LY6E	chr8	142870433	C	A	b38	rs4736346	3.7e-05	-0.13	Cells - Cultured fibroblasts
ENSG00000160932.10	LY6E	chr8	143377377	C	T	b38	rs75051545	3.8e-05	-0.68	Esophagus - Mucosa
ENSG00000160932.10	LY6E	chr8	143377646	G	GC	b38	rs146818765	3.8e-05	-0.68	Esophagus - Mucosa
ENSG00000160932.10	LY6E	chr8	142999768	C	T	b38	rs6558328	3.8e-05	0.2	Pancreas
ENSG00000160932.10	LY6E	chr8	142913003	T	TG	b38	rs5895735	3.9e-05	-0.13	Cells - Cultured fibroblasts
ENSG00000160932.10	LY6E	chr8	142956083	A	G	b38	rs9694672	4e-05	0.29	Adrenal Gland
ENSG00000160932.10	LY6E	chr8	142957314	G	A	b38	rs9772770	4e-05	0.29	Adrenal Gland
ENSG00000160932.10	LY6E	chr8	143012511	C	T	b38	rs4270939	4e-05	-0.11	Adipose - Visceral (Omentum)
ENSG00000160932.10	LY6E	chr8	142846817	G	T	b38	rs2078674	4e-05	-0.13	Cells - Cultured fibroblasts
ENSG00000160932.10	LY6E	chr8	142853663	G	A	b38	rs4736345	4e-05	-0.13	Cells - Cultured fibroblasts
ENSG00000160932.10	LY6E	chr8	142856691	T	G	b38	rs28449411	4e-05	-0.13	Cells - Cultured fibroblasts
ENSG00000160932.10	LY6E	chr8	142856847	C	T	b38	rs57970308	4e-05	-0.13	Cells - Cultured fibroblasts
ENSG00000160932.10	LY6E	chr8	142984973	G	T	b38	rs78904892	4e-05	0.15	Nerve - Tibial
ENSG00000160932.10	LY6E	chr8	142988304	G	A	b38	rs35899216	4.1e-05	0.15	Nerve - Tibial
ENSG00000160932.10	LY6E	chr8	143005588	C	T	b38	rs13263165	4.2e-05	0.2	Pancreas
ENSG00000160932.10	LY6E	chr8	143008172	C	A	b38	rs4596631	4.2e-05	0.2	Pancreas
ENSG00000160932.10	LY6E	chr8	143008423	T	G	b38	rs4645544	4.2e-05	0.2	Pancreas
ENSG00000160932.10	LY6E	chr8	142860181	T	TTTAA	b38	rs35458952	4.2e-05	-0.13	Cells - Cultured fibroblasts
ENSG00000160932.10	LY6E	chr8	143013213	C	G	b38	rs4272356	4.3e-05	-0.16	Esophagus - Gastroesophageal Junction
ENSG00000160932.10	LY6E	chr8	143115268	G	A	b38	rs113725141	4.3e-05	0.46	Cells - Cultured fibroblasts
ENSG00000160932.10	LY6E	chr8	143064576	G	T	b38	rs78407874	4.4e-05	-0.68	Cells - Cultured fibroblasts
ENSG00000160932.10	LY6E	chr8	143065695	G	A	b38	rs114489078	4.4e-05	-0.68	Cells - Cultured fibroblasts
ENSG00000160932.10	LY6E	chr8	143067390	C	A	b38	rs116326099	4.4e-05	-0.68	Cells - Cultured fibroblasts
ENSG00000160932.10	LY6E	chr8	142985663	G	A	b38	rs13248022	4.4e-05	-0.17	Brain - Nucleus accumbens (basal ganglia)
ENSG00000160932.10	LY6E	chr8	143127625	GGGAGGGACATA	G	b38	rs143787053	4.4e-05	0.36	Skin - Not Sun Exposed (Suprapubic)
ENSG00000160932.10	LY6E	chr8	143053970	G	T	b38	rs4977119	4.6e-05	0.22	Pancreas
ENSG00000160932.10	LY6E	chr8	142917246	G	A	b38	rs13276226	4.6e-05	0.14	Cells - Cultured fibroblasts
ENSG00000160932.10	LY6E	chr8	143012447	C	T	b38	rs4270938	4.7e-05	-0.15	Esophagus - Muscularis
ENSG00000160932.10	LY6E	chr8	142851603	C	T	b38	rs4248903	4.8e-05	-0.13	Cells - Cultured fibroblasts
ENSG00000160932.10	LY6E	chr8	142851604	A	G	b38	rs4248904	4.8e-05	-0.13	Cells - Cultured fibroblasts
ENSG00000160932.10	LY6E	chr8	142852748	G	T	b38	rs62524973	4.8e-05	-0.13	Cells - Cultured fibroblasts
ENSG00000160932.10	LY6E	chr8	142853809	C	T	b38	rs11990613	4.8e-05	-0.13	Cells - Cultured fibroblasts
ENSG00000160932.10	LY6E	chr8	142862996	T	TTCTG	b38	rs10692262	4.8e-05	-0.13	Cells - Cultured fibroblasts
ENSG00000160932.10	LY6E	chr8	142864307	T	G	b38	rs4288358	4.8e-05	-0.13	Cells - Cultured fibroblasts
ENSG00000160932.10	LY6E	chr8	142864371	G	T	b38	rs4478551	4.8e-05	-0.13	Cells - Cultured fibroblasts
ENSG00000160932.10	LY6E	chr8	142869370	C	T	b38	rs4537287	4.8e-05	-0.13	Cells - Cultured fibroblasts
ENSG00000160932.10	LY6E	chr8	142870798	G	A	b38	rs10093618	4.8e-05	-0.13	Cells - Cultured fibroblasts
ENSG00000160932.10	LY6E	chr8	142872521	A	C	b38	rs4736312	4.8e-05	-0.13	Cells - Cultured fibroblasts
ENSG00000160932.10	LY6E	chr8	142872807	C	A	b38	rs1134096	4.8e-05	-0.13	Cells - Cultured fibroblasts
ENSG00000160932.10	LY6E	chr8	142872874	G	A	b38	rs1134095	4.8e-05	-0.13	Cells - Cultured fibroblasts
ENSG00000160932.10	LY6E	chr8	142873331	T	C	b38	rs7003319	4.8e-05	-0.13	Cells - Cultured fibroblasts
ENSG00000160932.10	LY6E	chr8	142873353	G	A	b38	rs5017238	4.8e-05	-0.13	Cells - Cultured fibroblasts
ENSG00000160932.10	LY6E	chr8	142873635	C	T	b38	rs5304	4.8e-05	-0.13	Cells - Cultured fibroblasts
ENSG00000160932.10	LY6E	chr8	142874055	T	C	b38	rs5299	4.8e-05	-0.13	Cells - Cultured fibroblasts
ENSG00000160932.10	LY6E	chr8	142874831	G	C	b38	rs4310186	4.8e-05	-0.13	Cells - Cultured fibroblasts
ENSG00000160932.10	LY6E	chr8	142953704	T	G	b38	rs4074074	4.8e-05	0.14	Cells - Cultured fibroblasts
ENSG00000160932.10	LY6E	chr8	143023156	A	C	b38	rs11787222	4.8e-05	-0.12	Adipose - Subcutaneous
ENSG00000160932.10	LY6E	chr8	142083439	G	A	b38	rs73714074	4.8e-05	-0.44	Esophagus - Mucosa
ENSG00000160932.10	LY6E	chr8	142083478	G	A	b38	rs73714075	4.8e-05	-0.44	Esophagus - Mucosa
ENSG00000160932.10	LY6E	chr8	142083485	C	A	b38	rs73714076	4.8e-05	-0.44	Esophagus - Mucosa
ENSG00000160932.10	LY6E	chr8	142084213	T	C	b38	rs55692349	4.8e-05	-0.44	Esophagus - Mucosa
ENSG00000160932.10	LY6E	chr8	142084432	C	T	b38	rs56343414	4.8e-05	-0.44	Esophagus - Mucosa
ENSG00000160932.10	LY6E	chr8	142085172	G	C	b38	rs59832695	4.8e-05	-0.44	Esophagus - Mucosa
ENSG00000160932.10	LY6E	chr8	142921874	A	G	b38	rs28710914	5.2e-05	-0.13	Cells - Cultured fibroblasts
ENSG00000160932.10	LY6E	chr8	143014251	G	A	b38	rs12681773	5.3e-05	-0.15	Esophagus - Muscularis
ENSG00000160932.10	LY6E	chr8	142868188	T	C	b38	rs10098023	5.3e-05	-0.13	Cells - Cultured fibroblasts
ENSG00000160932.10	LY6E	chr8	143001611	T	A	b38	rs4977141	5.6e-05	-0.19	Pancreas
ENSG00000160932.10	LY6E	chr8	142916379	C	T	b38	rs11781816	5.7e-05	0.13	Cells - Cultured fibroblasts
ENSG00000160932.10	LY6E	chr8	143010799	G	A	b38	rs7832588	5.7e-05	0.14	Nerve - Tibial
ENSG00000160932.10	LY6E	chr8	142824326	A	G	b38	rs4013169	5.7e-05	-0.13	Cells - Cultured fibroblasts
ENSG00000160932.10	LY6E	chr8	142588766	G	A	b38	rs73375855	5.8e-05	-0.35	Whole Blood
ENSG00000160932.10	LY6E	chr8	142590247	G	A	b38	rs113170108	5.8e-05	-0.35	Whole Blood
ENSG00000160932.10	LY6E	chr8	142590404	C	T	b38	rs73375861	5.8e-05	-0.35	Whole Blood
ENSG00000160932.10	LY6E	chr8	142592131	G	T	b38	rs6583651	5.8e-05	-0.35	Whole Blood
ENSG00000160932.10	LY6E	chr8	142914947	A	G	b38	rs6418	5.9e-05	-0.13	Cells - Cultured fibroblasts
ENSG00000160932.10	LY6E	chr8	143042461	C	A	b38	rs73370212	5.9e-05	0.51	Cells - Cultured fibroblasts
ENSG00000160932.10	LY6E	chr8	142914949	G	A	b38	rs6399	6e-05	-0.13	Cells - Cultured fibroblasts
ENSG00000160932.10	LY6E	chr8	143013213	C	G	b38	rs4272356	6e-05	-0.14	Thyroid
ENSG00000160932.10	LY6E	chr8	143012733	C	T	b38	rs4270940	6.2e-05	-0.11	Adipose - Visceral (Omentum)
ENSG00000160932.10	LY6E	chr8	142865013	G	C	b38	rs6995180	6.3e-05	-0.13	Cells - Cultured fibroblasts
ENSG00000160932.10	LY6E	chr8	142866580	C	CTG	b38	rs10690160	6.3e-05	-0.13	Cells - Cultured fibroblasts
ENSG00000160932.10	LY6E	chr8	142931158	A	G	b38	rs36151582	6.4e-05	0.13	Cells - Cultured fibroblasts
ENSG00000160932.10	LY6E	chr8	142934570	T	C	b38	rs149665153	6.4e-05	0.13	Cells - Cultured fibroblasts
ENSG00000160932.10	LY6E	chr8	142935011	T	C	b38	rs36169959	6.4e-05	0.13	Cells - Cultured fibroblasts
ENSG00000160932.10	LY6E	chr8	143379220	C	T	b38	rs116056094	6.5e-05	-0.68	Esophagus - Mucosa
ENSG00000160932.10	LY6E	chr8	143381793	A	G	b38	rs114683790	6.5e-05	-0.68	Esophagus - Mucosa
ENSG00000160932.10	LY6E	chr8	143383803	C	T	b38	rs77739394	6.5e-05	-0.68	Esophagus - Mucosa
ENSG00000160932.10	LY6E	chr8	143385336	C	T	b38	rs114815525	6.5e-05	-0.68	Esophagus - Mucosa
ENSG00000160932.10	LY6E	chr8	143386508	G	C	b38	rs76410655	6.5e-05	-0.68	Esophagus - Mucosa
ENSG00000160932.10	LY6E	chr8	143386842	A	G	b38	rs115878401	6.5e-05	-0.68	Esophagus - Mucosa
ENSG00000160932.10	LY6E	chr8	142922390	AG	A	b38	rs36066774	6.6e-05	0.13	Cells - Cultured fibroblasts
ENSG00000160932.10	LY6E	chr8	142866164	A	G	b38	rs4736309	6.6e-05	-0.13	Cells - Cultured fibroblasts
ENSG00000160932.10	LY6E	chr8	143034236	G	A	b38	rs28893234	6.7e-05	-0.082	Whole Blood
ENSG00000160932.10	LY6E	chr8	142986837	C	T	b38	rs28630967	6.8e-05	0.23	Cells - Cultured fibroblasts
ENSG00000160932.10	LY6E	chr8	142956052	T	C	b38	rs73715286	6.8e-05	-0.38	Skin - Sun Exposed (Lower leg)
ENSG00000160932.10	LY6E	chr8	142915893	C	T	b38	rs13257680	6.9e-05	0.13	Cells - Cultured fibroblasts
ENSG00000160932.10	LY6E	chr8	142839667	G	A	b38	rs1016935	7e-05	0.15	Cells - Cultured fibroblasts
ENSG00000160932.10	LY6E	chr8	143678497	T	C	b38	rs372695566	7e-05	-0.44	Esophagus - Mucosa
ENSG00000160932.10	LY6E	chr8	143684741	T	C	b38	rs73371141	7e-05	-0.74	Esophagus - Mucosa
ENSG00000160932.10	LY6E	chr8	142876440	G	A	b38	rs7822986	7.2e-05	-0.13	Cells - Cultured fibroblasts
ENSG00000160932.10	LY6E	chr8	142843958	A	G	b38	rs56400819	7.2e-05	-0.13	Cells - Cultured fibroblasts
ENSG00000160932.10	LY6E	chr8	142844078	A	AATTATT	b38	rs58066462	7.2e-05	-0.13	Cells - Cultured fibroblasts
ENSG00000160932.10	LY6E	chr8	142844079	C	CATAT	b38	rs72036463	7.2e-05	-0.13	Cells - Cultured fibroblasts
ENSG00000160932.10	LY6E	chr8	142844080	C	A	b38	rs59123995	7.2e-05	-0.13	Cells - Cultured fibroblasts
ENSG00000160932.10	LY6E	chr8	142850482	T	G	b38	rs7003379	7.2e-05	-0.13	Cells - Cultured fibroblasts
ENSG00000160932.10	LY6E	chr8	142852998	A	C	b38	rs4736304	7.2e-05	-0.13	Cells - Cultured fibroblasts
ENSG00000160932.10	LY6E	chr8	142856428	T	G	b38	rs28813538	7.2e-05	-0.13	Cells - Cultured fibroblasts
ENSG00000160932.10	LY6E	chr8	142857116	G	A	b38	rs28674937	7.2e-05	-0.13	Cells - Cultured fibroblasts
ENSG00000160932.10	LY6E	chr8	142859648	G	A	b38	rs6996242	7.2e-05	-0.13	Cells - Cultured fibroblasts
ENSG00000160932.10	LY6E	chr8	142859861	A	AT	b38	rs35629244	7.2e-05	-0.13	Cells - Cultured fibroblasts
ENSG00000160932.10	LY6E	chr8	142859973	T	C	b38	rs4523233	7.2e-05	-0.13	Cells - Cultured fibroblasts
ENSG00000160932.10	LY6E	chr8	142859975	C	T	b38	rs4513950	7.2e-05	-0.13	Cells - Cultured fibroblasts
ENSG00000160932.10	LY6E	chr8	142861741	A	G	b38	rs4370512	7.2e-05	-0.13	Cells - Cultured fibroblasts
ENSG00000160932.10	LY6E	chr8	142868099	T	A	b38	rs10097914	7.2e-05	-0.13	Cells - Cultured fibroblasts
ENSG00000160932.10	LY6E	chr8	142869282	A	C	b38	rs4581033	7.2e-05	-0.13	Cells - Cultured fibroblasts
ENSG00000160932.10	LY6E	chr8	142916791	G	A	b38	rs11779229	7.2e-05	0.13	Cells - Cultured fibroblasts
ENSG00000160932.10	LY6E	chr8	142917010	C	T	b38	rs13268153	7.2e-05	0.13	Cells - Cultured fibroblasts
ENSG00000160932.10	LY6E	chr8	143389316	T	C	b38	rs115678378	7.3e-05	-0.63	Esophagus - Mucosa
ENSG00000160932.10	LY6E	chr8	143012511	C	T	b38	rs4270939	7.5e-05	-0.14	Thyroid
ENSG00000160932.10	LY6E	chr8	142929274	A	G	b38	rs36145723	7.6e-05	0.13	Cells - Cultured fibroblasts
ENSG00000160932.10	LY6E	chr8	142932082	A	G	b38	rs148237168	7.6e-05	0.13	Cells - Cultured fibroblasts
ENSG00000160932.10	LY6E	chr8	142932083	T	C	b38	rs141479263	7.6e-05	0.13	Cells - Cultured fibroblasts
ENSG00000160932.10	LY6E	chr8	142875392	A	C	b38	rs6395	7.7e-05	-0.13	Cells - Cultured fibroblasts
ENSG00000160932.10	LY6E	chr8	142853433	C	T	b38	rs4736344	7.9e-05	-0.13	Cells - Cultured fibroblasts
ENSG00000160932.10	LY6E	chr8	142998357	C	T	b38	rs66978047	7.9e-05	0.23	Cells - Cultured fibroblasts
ENSG00000160932.10	LY6E	chr8	142999609	T	G	b38	rs60326626	7.9e-05	0.23	Cells - Cultured fibroblasts
ENSG00000160932.10	LY6E	chr8	142961903	C	A	b38	rs76595729	7.9e-05	-0.3	Nerve - Tibial
ENSG00000160932.10	LY6E	chr8	142871284	A	G	b38	rs4736311	7.9e-05	-0.13	Cells - Cultured fibroblasts
ENSG00000160932.10	LY6E	chr8	142985820	C	T	b38	rs13263729	8.5e-05	0.14	Nerve - Tibial
ENSG00000160932.10	LY6E	chr8	143064576	G	T	b38	rs78407874	8.6e-05	-0.77	Esophagus - Mucosa
ENSG00000160932.10	LY6E	chr8	143065695	G	A	b38	rs114489078	8.6e-05	-0.77	Esophagus - Mucosa
ENSG00000160932.10	LY6E	chr8	143067390	C	A	b38	rs116326099	8.6e-05	-0.77	Esophagus - Mucosa
ENSG00000160932.10	LY6E	chr8	142857161	G	A	b38	rs28719775	8.7e-05	-0.12	Cells - Cultured fibroblasts
ENSG00000160932.10	LY6E	chr8	142993864	C	T	b38	rs4424237	8.7e-05	-0.12	Adipose - Subcutaneous
ENSG00000160932.10	LY6E	chr8	142995826	A	T	b38	rs12548954	8.7e-05	-0.12	Adipose - Subcutaneous
ENSG00000160932.10	LY6E	chr8	142995836	T	C	b38	rs12547761	8.7e-05	-0.12	Adipose - Subcutaneous
ENSG00000160932.10	LY6E	chr8	142996523	G	A	b38	rs6993581	8.7e-05	-0.12	Adipose - Subcutaneous
ENSG00000160932.10	LY6E	chr8	142996969	T	TA	b38	rs556668690	8.7e-05	-0.12	Adipose - Subcutaneous
ENSG00000160932.10	LY6E	chr8	142997887	A	G	b38	rs55871229	8.7e-05	-0.12	Adipose - Subcutaneous
ENSG00000160932.10	LY6E	chr8	142998171	G	A	b38	rs12675512	8.7e-05	-0.12	Adipose - Subcutaneous
ENSG00000160932.10	LY6E	chr8	143120811	C	T	b38	rs58280422	8.9e-05	0.49	Cells - Cultured fibroblasts
ENSG00000160932.10	LY6E	chr8	143012898	G	A	b38	rs4385452	8.9e-05	-0.14	Thyroid
ENSG00000160932.10	LY6E	chr8	142868610	G	A	b38	rs7016088	9.3e-05	-0.12	Cells - Cultured fibroblasts
ENSG00000160932.10	LY6E	chr8	142868798	T	C	b38	rs7005638	9.3e-05	-0.12	Cells - Cultured fibroblasts
ENSG00000160932.10	LY6E	chr8	142869085	G	A	b38	rs4548164	9.3e-05	-0.12	Cells - Cultured fibroblasts
ENSG00000160932.10	LY6E	chr8	143685759	C	G	b38	rs112799292	9.3e-05	-0.63	Esophagus - Mucosa
ENSG00000160932.10	LY6E	chr8	142913286	G	T	b38	rs4538	9.8e-05	-0.13	Cells - Cultured fibroblasts
ENSG00000160932.10	LY6E	chr8	142906203	G	T	b38	rs57219141	9.8e-05	-0.13	Cells - Cultured fibroblasts
ENSG00000160932.10	LY6E	chr8	142125918	G	C	b38	rs73371586	9.8e-05	-0.35	Skin - Sun Exposed (Lower leg)
ENSG00000160932.10	LY6E	chr8	142883848	G	C	b38	rs6471572	0.0001	-0.13	Cells - Cultured fibroblasts
ENSG00000160932.10	LY6E	chr8	143013832	G	A	b38	rs7812819	0.0001	-0.14	Esophagus - Muscularis
ENSG00000160932.10	LY6E	chr8	143019697	T	C	b38	rs58558679	0.0001	-0.12	Adipose - Subcutaneous
ENSG00000160932.10	LY6E	chr8	142987678	T	C	b38	rs73717919	0.0001	-0.54	Esophagus - Mucosa
ENSG00000160932.10	LY6E	chr8	142995306	AG	A	b38	rs35679135	0.0001	0.14	Nerve - Tibial
ENSG00000160932.10	LY6E	chr8	142081344	G	A	b38	rs73714070	0.0001	-0.42	Esophagus - Mucosa
ENSG00000160932.10	LY6E	chr8	142952631	G	A	b38	rs141200487	0.00011	-0.3	Skin - Sun Exposed (Lower leg)
ENSG00000160932.10	LY6E	chr8	143159860	A	T	b38	rs562046783	0.00011	0.41	Muscle - Skeletal
ENSG00000160932.10	LY6E	chr8	143002055	G	C	b38	rs6651420	0.00011	0.7	Esophagus - Mucosa
ENSG00000160932.10	LY6E	chr8	143678496	G	C	b38	rs535392778	0.00011	-0.54	Esophagus - Mucosa
ENSG00000160932.10	LY6E	chr8	142995794	G	A	b38	rs7819799	0.00011	0.22	Cells - Cultured fibroblasts
ENSG00000160932.10	LY6E	chr8	142960423	T	TG	b38	rs201278789	0.00011	-0.38	Skin - Sun Exposed (Lower leg)
ENSG00000160932.10	LY6E	chr8	142847540	T	C	b38	rs1114761	0.00011	-0.12	Cells - Cultured fibroblasts
ENSG00000160932.10	LY6E	chr8	142873679	A	G	b38	rs5303	0.00011	-0.12	Cells - Cultured fibroblasts
ENSG00000160932.10	LY6E	chr8	142887792	T	C	b38	rs7388251	0.00011	-0.12	Cells - Cultured fibroblasts
ENSG00000160932.10	LY6E	chr8	142900976	A	C	b38	rs7011830	0.00011	-0.12	Cells - Cultured fibroblasts
ENSG00000160932.10	LY6E	chr8	143013832	G	A	b38	rs7812819	0.00012	-0.13	Thyroid
ENSG00000160932.10	LY6E	chr8	142994397	CA	C	b38	rs5895738	0.00012	-0.12	Adipose - Subcutaneous
ENSG00000160932.10	LY6E	chr8	142942340	A	G	b38	rs140211487	0.00012	0.13	Cells - Cultured fibroblasts
ENSG00000160932.10	LY6E	chr8	143601796	T	C	b38	rs35636519	0.00012	-0.72	Esophagus - Mucosa
ENSG00000160932.10	LY6E	chr8	142826664	A	G	b38	rs9692814	0.00012	-0.12	Cells - Cultured fibroblasts
ENSG00000160932.10	LY6E	chr8	142106946	G	A	b38	rs80073630	0.00013	-0.65	Esophagus - Mucosa
ENSG00000160932.10	LY6E	chr8	142906632	T	A	b38	rs4379428	0.00013	-0.13	Cells - Cultured fibroblasts
ENSG00000160932.10	LY6E	chr8	142999959	T	C	b38	rs12682437	0.00013	-0.12	Adipose - Subcutaneous
ENSG00000160932.10	LY6E	chr8	143000489	T	C	b38	rs62525863	0.00013	-0.12	Adipose - Subcutaneous
ENSG00000160932.10	LY6E	chr8	143000767	C	T	b38	rs60000126	0.00013	-0.12	Adipose - Subcutaneous
ENSG00000160932.10	LY6E	chr8	143000868	T	C	b38	rs60299647	0.00013	-0.12	Adipose - Subcutaneous
ENSG00000160932.10	LY6E	chr8	142882493	T	C	b38	rs62525051	0.00013	-0.13	Cells - Cultured fibroblasts
ENSG00000160932.10	LY6E	chr8	142884284	C	T	b38	rs12678054	0.00013	-0.13	Cells - Cultured fibroblasts
ENSG00000160932.10	LY6E	chr8	142893371	A	G	b38	rs10808681	0.00013	-0.13	Cells - Cultured fibroblasts
ENSG00000160932.10	LY6E	chr8	142893709	C	T	b38	rs57646597	0.00013	-0.13	Cells - Cultured fibroblasts
ENSG00000160932.10	LY6E	chr8	142894217	T	C	b38	rs10110115	0.00013	-0.13	Cells - Cultured fibroblasts
ENSG00000160932.10	LY6E	chr8	143024390	ACTTCCCCG	A	b38	rs145406495	0.00013	0.23	Cells - Cultured fibroblasts
ENSG00000160932.10	LY6E	chr8	142932620	A	G	b38	rs369641995	0.00014	0.13	Cells - Cultured fibroblasts
ENSG00000160932.10	LY6E	chr8	142875549	A	G	b38	rs6391	0.00014	-0.12	Cells - Cultured fibroblasts
ENSG00000160932.10	LY6E	chr8	142873902	T	G	b38	rs12543598	0.00014	-0.12	Cells - Cultured fibroblasts
ENSG00000160932.10	LY6E	chr8	142883449	A	G	b38	rs6471571	0.00014	-0.13	Cells - Cultured fibroblasts
ENSG00000160932.10	LY6E	chr8	143022018	C	T	b38	rs4464948	0.00014	-0.22	Skin - Not Sun Exposed (Suprapubic)
ENSG00000160932.10	LY6E	chr8	143013580	G	A	b38	rs6558340	0.00014	-0.23	Skin - Not Sun Exposed (Suprapubic)
ENSG00000160932.10	LY6E	chr8	142875989	A	C	b38	rs6471570	0.00015	-0.12	Cells - Cultured fibroblasts
ENSG00000160932.10	LY6E	chr8	142875509	T	C	b38	rs6392	0.00015	-0.12	Cells - Cultured fibroblasts
ENSG00000160932.10	LY6E	chr8	142868936	G	A	b38	rs7016594	0.00015	-0.12	Cells - Cultured fibroblasts
ENSG00000160932.10	LY6E	chr8	143027260	A	AC	b38	rs11378733	0.00015	0.23	Cells - Cultured fibroblasts
ENSG00000160932.10	LY6E	chr8	143104639	G	A	b38	rs10091409	0.00017	0.4	Cells - Cultured fibroblasts
ENSG00000160932.10	LY6E	chr8	143105334	C	T	b38	rs9694098	0.00017	0.4	Cells - Cultured fibroblasts
ENSG00000160932.10	LY6E	chr8	142834799	A	C	b38	rs45445491	0.00017	-0.12	Cells - Cultured fibroblasts
ENSG00000160932.10	LY6E	chr8	143342922	C	T	b38	rs143360705	0.00017	-0.6	Cells - Cultured fibroblasts
ENSG00000160932.10	LY6E	chr8	143127669	G	A	b38	rs114897443	0.00018	0.48	Cells - Cultured fibroblasts
ENSG00000160932.10	LY6E	chr8	142905285	A	G	b38	rs6471580	0.00018	-0.12	Cells - Cultured fibroblasts
ENSG00000160932.10	LY6E	chr8	142905775	G	A	b38	rs6987382	0.00018	-0.12	Cells - Cultured fibroblasts
