# Supplementary material for: Impact of natural selection on global patterns of genetic variation, and association with clinical phenotypes, at genes involved in SARS-CoV-2 infection
Source: Res Sq. 2021 Jul 27:rs.3.rs-673011. Preprint. [Version 1] doi: 10.21203/rs.3.rs-673011/v1 (PMC8328070; doi:10.21203/rs.3.rs-673011/v1)
Supplement: Supplement 5 [file 97412dec820e2f609407002f.xlsx]

## Sheet: Sheet1
#Dn/Ds test for the four genes in the pooled dataset
gene	n	N	pn	dn	s	S	ps	ds	dnds
ACE2	41	1912.67	0.021436	0.0217483	14	505.333	0.0277045	0.0282291	0.770422
TMPRSS2	48	1230	0.0390244	0.0400763	45	360	0.125	0.136741	0.293082
CD26	45	1818	0.0247525	0.0251701	33	483	0.068323	0.0716379	0.351352
LY6E	9	294.333	0.0305776	0.0312184	9	101.667	0.188119	0.216587	0.144138
#Dn/Ds test for ACE2 in each ethnic grou
Population	n	N	pn	dn	s	S	ps	ds	dnds
EAS	7	1912.67	0.00365981	0.00366877	1	505.333	0.00197889	0.00198151	1.85151
EUR	2	1912.67	0.00104566	0.00104639	1	505.333	0.00197889	0.00198151	0.528078
AFR	8	1912.67	0.00418264	0.00419435	3	505.333	0.00593668	0.0059603	0.703715
AMR	3	1912.67	0.00156849	0.00157013	5	505.333	0.00989446	0.00996031	0.157639
SAS	8	1912.67	0.00418264	0.00419435	3	505.333	0.00593668	0.0059603	0.703715
Kenya.Nilo-Saharan	3	1912.67	0.00156849	0.00157013	3	505.333	0.00593668	0.0059603	0.263432
Cameroon.NigerKordofanian	5	1912.67	0.00261415	0.00261872	3	505.333	0.00593668	0.0059603	0.43936
Tanzania.Afroasiatic	2	1912.67	0.00104566	0.00104639	2	505.333	0.00395778	0.00396826	0.26369
Kenya.Afroasiatic	1	1912.67	0.00052283	0.000523013	1	505.333	0.00197889	0.00198151	0.263947
Botswana.Khoesan	1	1912.67	0.00052283	0.000523013	4	505.333	0.00791557	0.00795763	0.0657246
Botswana.Niger-Kordofanian	2	1912.67	0.00104566	0.00104639	1	505.333	0.00197889	0.00198151	0.528078
Ethiopia.Afroasiatic	9	1912.67	0.00470547	0.0047203	3	505.333	0.00593668	0.0059603	0.791956
Cameroon.Pygmy	3	1912.67	0.00156849	0.00157013	2	505.333	0.00395778	0.00396826	0.395673
Ethiopia.Niolo-Saharan	0	1912.67	0	0	1	505.333	0.00197889	0.00198151	0
Tanzania.Hadzabe	3	1912.67	0.00156849	0.00157013	1	505.333	0.00197889	0.00198151	0.792393
Cameroon.Fulani	1	1912.67	0.00052283	0.000523013	2	505.333	0.00395778	0.00396826	0.131799
Tanzania.Sandawe	3	1912.67	0.00156849	0.00157013	1	505.333	0.00197889	0.00198151	0.792393
Ethiopia.Sabue	0	1912.67	0	0	0	505.333	0	0	N
#Dn/Ds test for TMPRSS2 in each population
Population	n	N	pn	dn	s	S	ps	ds	dnds
EAS	9	1230	0.00731707	0.007353	12	360	0.0333333	0.0340968	0.215651
EUR	7	1230	0.00569106	0.00571276	13	360	0.0361111	0.0370094	0.15436
AFR	12	1230	0.0097561	0.00982011	11	360	0.0305556	0.0311954	0.314793
AMR	13	1230	0.0105691	0.0106443	10	360	0.0277778	0.0283052	0.376053
SAS	12	1230	0.0097561	0.00982011	12	360	0.0333333	0.0340968	0.288007
Kenya.Nilo-Saharan	3	1230	0.00243902	0.002443	7	360	0.0194444	0.0197009	0.124004
Cameroon.NigerKordofanian	8	1230	0.00650407	0.00653243	8	360	0.0222222	0.0225581	0.289583
Tanzania.Afroasiatic	4	1230	0.00325203	0.0032591	6	360	0.0166667	0.0168546	0.193365
Kenya.Afroasiatic	3	1230	0.00243902	0.002443	5	360	0.0138889	0.0140191	0.174262
Botswana.Khoesan	5	1230	0.00406504	0.0040761	8	360	0.0222222	0.0225581	0.180693
Botswana.Niger-Kordofanian	5	1230	0.00406504	0.0040761	4	360	0.0111111	0.0111942	0.364125
Ethiopia.Afroasiatic	11	1230	0.00894309	0.00899684	12	360	0.0333333	0.0340968	0.263862
Cameroon.Pygmy	8	1230	0.00650407	0.00653243	7	360	0.0194444	0.0197009	0.33158
Ethiopia.Niolo-Saharan	4	1230	0.00325203	0.0032591	4	360	0.0111111	0.0111942	0.291141
Tanzania.Hadzabe	4	1230	0.00325203	0.0032591	6	360	0.0166667	0.0168546	0.193365
Cameroon.Fulani	3	1230	0.00243902	0.002443	4	360	0.0111111	0.0111942	0.218237
Tanzania.Sandawe	3	1230	0.00243902	0.002443	8	360	0.0222222	0.0225581	0.108298
Ethiopia.Sabue	2	1230	0.00162602	0.00162778	4	360	0.0111111	0.0111942	0.145412
#Dn/Ds test for DDP4 in each population
Population	n	N	pn	dn	s	S	ps	ds	dnds
EAS	7	1818	0.00385039	0.0038603	7	483	0.0144928	0.0146346	0.263779
EUR	7	1818	0.00385039	0.0038603	7	483	0.0144928	0.0146346	0.263779
AFR	9	1818	0.0049505	0.00496691	11	483	0.0227743	0.0231273	0.214764
AMR	3	1818	0.00165017	0.00165198	8	483	0.0165631	0.0167488	0.0986331
SAS	4	1818	0.00220022	0.00220345	8	483	0.0165631	0.0167488	0.131559
Kenya.Nilo-Saharan	7	1818	0.00385039	0.0038603	5	483	0.010352	0.0104241	0.370326
Cameroon.NigerKordofanian	2	1818	0.00110011	0.00110092	7	483	0.0144928	0.0146346	0.075227
Tanzania.Afroasiatic	1	1818	0.000550055	0.000550257	2	483	0.00414079	0.00415226	0.13252
Kenya.Afroasiatic	3	1818	0.00165017	0.00165198	2	483	0.00414079	0.00415226	0.397852
Botswana.Khoesan	2	1818	0.00110011	0.00110092	6	483	0.0124224	0.0125264	0.0878879
Botswana.Niger-Kordofanian	2	1818	0.00110011	0.00110092	3	483	0.00621118	0.00623704	0.176513
Ethiopia.Afroasiatic	10	1818	0.00550055	0.00552082	5	483	0.010352	0.0104241	0.529622
Cameroon.Pygmy	1	1818	0.000550055	0.000550257	4	483	0.00828157	0.00832764	0.066076
Ethiopia.Niolo-Saharan	1	1818	0.000550055	0.000550257	2	483	0.00414079	0.00415226	0.13252
Tanzania.Hadzabe	1	1818	0.000550055	0.000550257	5	483	0.010352	0.0104241	0.0527871
Cameroon.Fulani	2	1818	0.00110011	0.00110092	3	483	0.00621118	0.00623704	0.176513
Tanzania.Sandawe	2	1818	0.00110011	0.00110092	4	483	0.00828157	0.00832764	0.132201
Ethiopia.Sabue	0	1818	0	0	1	483	0.00207039	0.00207326	0
#Dn/Ds test for LY6E in each population
Population	n	N	pn	dn	s	S	ps	ds	dnds
EAS	1	294.333	0.00339751	0.00340523	4	101.667	0.0393443	0.0404138	0.084259
EUR	1	294.333	0.00339751	0.00340523	4	101.667	0.0393443	0.0404138	0.084259
AFR	4	294.333	0.01359	0.0137147	4	101.667	0.0393443	0.0404138	0.339356
AMR	2	294.333	0.00679502	0.00682599	3	101.667	0.0295082	0.0301044	0.226744
SAS	0	294.333	0	0	2	101.667	0.0196721	0.0199347	0
Kenya.Nilo-Saharan	2	294.333	0.00679502	0.00682599	3	101.667	0.0295082	0.0301044	0.226744
Cameroon.NigerKordofanian	2	294.333	0.00679502	0.00682599	1	101.667	0.00983607	0.00990113	0.689415
Tanzania.Afroasiatic	2	294.333	0.00679502	0.00682599	3	101.667	0.0295082	0.0301044	0.226744
Kenya.Afroasiatic	1	294.333	0.00339751	0.00340523	1	101.667	0.00983607	0.00990113	0.343923
Botswana.Khoesan	1	294.333	0.00339751	0.00340523	1	101.667	0.00983607	0.00990113	0.343923
Botswana.Niger-Kordofanian	1	294.333	0.00339751	0.00340523	1	101.667	0.00983607	0.00990113	0.343923
Ethiopia.Afroasiatic	2	294.333	0.00679502	0.00682599	2	101.667	0.0196721	0.0199347	0.342417
Cameroon.Pygmy	2	294.333	0.00679502	0.00682599	1	101.667	0.00983607	0.00990113	0.689415
Ethiopia.Niolo-Saharan	2	294.333	0.00679502	0.00682599	2	101.667	0.0196721	0.0199347	0.342417
Tanzania.Hadzabe	2	294.333	0.00679502	0.00682599	1	101.667	0.00983607	0.00990113	0.689415
Cameroon.Fulani	0	294.333	0	0	1	101.667	0.00983607	0.00990113	0
Tanzania.Sandawe	2	294.333	0.00679502	0.00682599	3	101.667	0.0295082	0.0301044	0.226744
Ethiopia.Sabue	1	294.333	0.00339751	0.00340523	1	101.667	0.00983607	0.00990113	0.343923
