# Supplementary material for: Impact of natural selection on global patterns of genetic variation, and association with clinical phenotypes, at genes involved in SARS-CoV-2 infection
Source: Res Sq. 2021 Jul 27:rs.3.rs-673011. Preprint. [Version 1] doi: 10.21203/rs.3.rs-673011/v1 (PMC8328070; doi:10.21203/rs.3.rs-673011/v1)
Supplement: Supplement 6 [file 77bae749ec861f2414d71b3a.xlsx]

## Sheet: Sheet1
#MK-test in the pooled dataset
gene	nonsyn-poly	syn-poly	non-fix	syn-fix	oddsratio	fisher_p
ACE2	41	14	8	6	0.45528455284552843,	0.943189
TMPRSS2	48	45	13	2	6.1	0.009
CD26	45	33	3	5	0.44	0.928973
LY6E	9	9	0	4	0	0.0977444
#MK-test for ACE2 in each ethnic group
Population	nonsyn_poly	syn_poly	nonsyn_fix	sny_fix	oddsratio	fisher_p
EAS	7	1	8	6	0.190476	0.979876
EUR	2	1	8	6	0.666667	0.823529
AFR	8	3	8	6	0.5	0.890456
AMR	3	5	8	6	2.22222	0.329721
SAS	8	3	8	6	0.5	0.890456
Kenya.Nilo-Saharan	3	3	8	6	1.33333	0.574303
Cameroon.NigerKordofanian	5	3	8	6	0.8	0.754489
Tanzania.Afroasiatic	2	2	8	6	1.33333	0.617647
Kenya.Afroasiatic	1	1	8	6	1.33333	0.7
Botswana.Khoesan	1	4	8	6	5.33333	0.184211
Botswana.Niger-Kordofanian	2	1	8	6	0.666667	0.823529
Ethiopia.Afroasiatic	9	3	8	6	0.444444	0.915332
Cameroon.Pygmy	3	2	8	6	0.888889	0.73323
Ethiopia.Niolo-Saharan	0	1	8	6	inf	0.466667
Tanzania.Hadzabe	3	1	8	6	0.444444	0.892157
Cameroon.Fulani	1	2	8	6	2.66667	0.452941
Tanzania.Sandawe	3	1	8	6	0.444444	0.892157
Ethiopia.Sabue	0	0	8	6	nan	1
#MK-test for TMPRSS2 in each ethnic group
Population	nonsyn_poly	syn_poly	nonsyn_fix	sny_fix	oddsratio	fisher_p
EAS	9	12	12	2	8	0.0128075
EUR	7	13	13	2	12.0714	0.00268986
AFR	12	11	13	2	5.95833	0.0301745
AMR	13	10	13	2	5	0.0523588
SAS	12	12	13	2	6.5	0.0214352
Kenya.Nilo-Saharan	3	7	13	2	15.1667	0.00650277
Cameroon.NigerKordofanian	7	8	11	2	6.28571	0.0434347
Tanzania.Afroasiatic	4	6	13	2	9.75	0.0220928
Kenya.Afroasiatic	3	5	13	2	10.8333	0.0257305
Botswana.Khoesan	5	8	13	2	10.4	0.0111365
Botswana.Niger-Kordofanian	5	4	13	2	5.2	0.11296
Ethiopia.Afroasiatic	11	12	13	2	7.09091	0.0165412
Cameroon.Pygmy	8	7	13	2	5.6875	0.0543228
Ethiopia.Niolo-Saharan	4	4	13	2	6.5	0.0814091
Tanzania.Hadzabe	4	6	13	2	9.75	0.0220928
Cameroon.Fulani	3	4	13	2	8.66667	0.0535698
Tanzania.Sandawe	3	8	13	2	17.3333	0.00341903
Ethiopia.Sabue	2	4	13	2	13	0.0307018
#MK-test for DDP4 in each ethnic group
Population	nonsyn_poly	syn_poly	nonsyn_fix	sny_fix	oddsratio	fisher_p
EAS	7	7	3	5	0.6	0.843653
EUR	7	7	3	5	0.6	0.843653
AFR	9	11	3	5	0.733333	0.781643
AMR	3	8	3	5	1.6	0.506192
SAS	4	8	3	5	1.2	0.608359
Kenya.Nilo-Saharan	7	5	3	5	0.428571	0.915099
Cameroon.NigerKordofanian	2	7	3	5	2.1	0.436652
Tanzania.Afroasiatic	1	2	3	5	1.2	0.721212
Kenya.Afroasiatic	3	2	3	5	0.4	0.913753
Botswana.Khoesan	2	6	3	5	1.8	0.5
Botswana.Niger-Kordofanian	2	3	3	5	0.9	0.750583
Ethiopia.Afroasiatic	10	5	3	5	0.3	0.963319
Cameroon.Pygmy	1	4	3	5	2.4	0.48951
Ethiopia.Niolo-Saharan	1	2	3	5	1.2	0.721212
Tanzania.Hadzabe	1	5	3	5	3	0.405594
Cameroon.Fulani	2	3	3	5	0.9	0.750583
Tanzania.Sandawe	2	4	3	5	1.2	0.657343
Ethiopia.Sabue	0	1	3	5	inf	0.666667
#MK-test for LY6E in each ethnic group
Population	nonsyn_poly	syn_poly	nonsyn_fix	sny_fix	oddsratio	fisher_p
EAS	1	4	0	4	0	1
EUR	1	4	0	4	0	1
AFR	4	4	0	4	0	1
AMR	2	3	0	4	0	1
SAS	0	2	0	4	nan	1
Kenya.Nilo-Saharan	2	3	0	4	0	1
Cameroon.NigerKordofanian	2	1	0	4	0	1
Tanzania.Afroasiatic	2	3	0	4	0	1
Kenya.Afroasiatic	1	1	0	4	0	1
Botswana.Khoesan	1	1	0	4	0	1
Botswana.Niger-Kordofanian	1	1	0	4	0	1
Ethiopia.Afroasiatic	2	2	0	4	0	1
Cameroon.Pygmy	2	1	0	4	0	1
Ethiopia.Niolo-Saharan	2	2	0	4	0	1
Tanzania.Hadzabe	2	1	0	4	0	1
Cameroon.Fulani	0	1	0	4	nan	1
Tanzania.Sandawe	2	3	0	4	0	1
Ethiopia.Sabue	1	1	0	4	0	1
