# Supplementary material for: Impact of natural selection on global patterns of genetic variation, and association with clinical phenotypes, at genes involved in SARS-CoV-2 infection
Source: Res Sq. 2021 Jul 27:rs.3.rs-673011. Preprint. [Version 1] doi: 10.21203/rs.3.rs-673011/v1 (PMC8328070; doi:10.21203/rs.3.rs-673011/v1)
Supplement: Supplement 7 [file c97885da0c2f0915a731109b.xlsx]

## Sheet: selection.anno.combination
gene	method	population	selection_score	chrom	position	rsid
TMPRSS2	ihs	EAS	-2.15406	21	41470061	rs2070788
TMPRSS2	ihs	EAS	-2.17526	21	41472130	rs7364083
TMPRSS2	ihs	AFR	2.06431	21	41478183	rs116170128
TMPRSS2	ihs	AFR	-2.29282	21	41513888	rs4437046
TMPRSS2	ihs	AFR	-2.3668	21	41514361	rs8133685
TMPRSS2	ihs	AFR	-2.3668	21	41514368	rs8134861
TMPRSS2	ihs	AFR	-2.04764	21	41515495	rs2097002
TMPRSS2	ihs	AFR	-3.70848	21	41517170	rs66953820
TMPRSS2	ihs	AFR	-3.42455	21	41517279	rs73230101
TMPRSS2	ihs	AFR	2.80396	21	41517530	rs10211909
TMPRSS2	ihs	AFR	2.66845	21	41517922	rs10211876
TMPRSS2	ihs	AFR	2.65197	21	41518235	rs7281696
TMPRSS2	ihs	AFR	2.65197	21	41518617	rs2210283
TMPRSS2	ihs	AFR	2.49398	21	41519531	rs12482673
TMPRSS2	ihs	AFR	2.55868	21	41521881	rs56095453
TMPRSS2	ihs	AFR	2.07661	21	41524378	rs11911661
TMPRSS2	ihs	AFR	-2.83076	21	41526290	rs7280868
TMPRSS2	ihs	AFR	2.14754	21	41526439	rs2838046
TMPRSS2	ihs	AFR	2.14754	21	41527303	rs9982091
TMPRSS2	ihs	AFR	-2.83406	21	41527316	rs9982095
TMPRSS2	ihs	AFR	-2.82561	21	41527325	rs9981925
TMPRSS2	ihs	AFR	2.14277	21	41527391	rs9982014
TMPRSS2	ihs	AFR	2.14277	21	41527442	rs9982037
TMPRSS2	ihs	AMR	2.22554	21	41463567	rs460976
TMPRSS2	ihs	AMR	2.21305	21	41467372	rs461194
TMPRSS2	ihs	AMR	2.31828	21	41468945	rs462448
TMPRSS2	ihs	AMR	2.1164	21	41470907	rs455922
TMPRSS2	ihs	AMR	2.11679	21	41471022	rs456016
TMPRSS2	ihs	AMR	2.13172	21	41472033	rs464431
TMPRSS2	ihs	AMR	2.52057	21	41472125	rs458280
TMPRSS2	ihs	AMR	2.28267	21	41476188	rs2298662
TMPRSS2	ihs	AMR	-2.40451	21	41485517	rs4816720
TMPRSS2	ihs	AMR	-2.05973	21	41541046	rs2838053
TMPRSS2	ihs	SAS	-2.27496	21	41473456	rs17854725
TMPRSS2	ihs	SAS	2.00757	21	41485974	rs62217531
TMPRSS2	ihs	SAS	2.42442	21	41538760	rs116847186
TMPRSS2	ihs	Kenya.Nilo-Saharan	3.09677	21	41517483	rs112714648
TMPRSS2	ihs	Kenya.Nilo-Saharan	2.90871	21	41517922	rs10211876
TMPRSS2	ihs	Kenya.Nilo-Saharan	2.90871	21	41518235	rs7281696
TMPRSS2	ihs	Kenya.Nilo-Saharan	2.67449	21	41519531	rs12482673
TMPRSS2	ihs	Kenya.Nilo-Saharan	2.38255	21	41520421	rs73231906
TMPRSS2	ihs	Kenya.Nilo-Saharan	2.82894	21	41521881	rs56095453
TMPRSS2	ihs	Kenya.Nilo-Saharan	2.09814	21	41523227	rs11910588
TMPRSS2	ihs	Kenya.Nilo-Saharan	2.23473	21	41524378	rs11911661
TMPRSS2	ihs	Kenya.Nilo-Saharan	-2.57713	21	41524852	rs73231913
TMPRSS2	ihs	Cameroon.NigerKordofanian	2.06965	21	41478183	rs116170128
TMPRSS2	ihs	Cameroon.NigerKordofanian	-2.06411	21	41517459	rs139037537
TMPRSS2	ihs	Cameroon.NigerKordofanian	2.7522	21	41517922	rs10211876
TMPRSS2	ihs	Cameroon.NigerKordofanian	2.7522	21	41518235	rs7281696
TMPRSS2	ihs	Cameroon.NigerKordofanian	2.84314	21	41518617	rs2210283
TMPRSS2	ihs	Cameroon.NigerKordofanian	2.62576	21	41519531	rs12482673
TMPRSS2	ihs	Cameroon.NigerKordofanian	-2.10045	21	41521135	.
TMPRSS2	ihs	Tanzania.Afroasiatic	2.06391	21	41460614	rs1557372
TMPRSS2	ihs	Tanzania.Afroasiatic	-2.33886	21	41463812	rs8133614
TMPRSS2	ihs	Tanzania.Afroasiatic	-2.2362	21	41465040	rs17001042
TMPRSS2	ihs	Tanzania.Afroasiatic	-2.15529	21	41469760	rs2070790
TMPRSS2	ihs	Tanzania.Afroasiatic	-2.2548	21	41470202	rs2070787
TMPRSS2	ihs	Tanzania.Afroasiatic	2.14406	21	41472311	rs28548447
TMPRSS2	ihs	Tanzania.Afroasiatic	-2.22142	21	41497136	rs415731
TMPRSS2	ihs	Tanzania.Afroasiatic	-2.25593	21	41500970	rs435877
TMPRSS2	ihs	Tanzania.Afroasiatic	-2.46845	21	41514790	rs9982595
TMPRSS2	ihs	Kenya.Afroasiatic	2.6614	21	41472311	rs28548447
TMPRSS2	ihs	Kenya.Afroasiatic	-2.11078	21	41517279	rs73230101
TMPRSS2	ihs	Kenya.Afroasiatic	2.19018	21	41517483	rs112714648
TMPRSS2	ihs	Botswana.Khoesan	2.09315	21	41455353	rs115386206
TMPRSS2	ihs	Botswana.Khoesan	-2.04769	21	41464550	rs76000363
TMPRSS2	ihs	Botswana.Khoesan	2.03262	21	41466211	rs73905370
TMPRSS2	ihs	Botswana.Khoesan	2.03262	21	41466271	rs55896064
TMPRSS2	ihs	Botswana.Khoesan	2.12986	21	41466703	.
TMPRSS2	ihs	Botswana.Khoesan	2.43372	21	41469423	.
TMPRSS2	ihs	Botswana.Khoesan	-2.28701	21	41470202	rs2070787
TMPRSS2	ihs	Botswana.Khoesan	-2.00088	21	41472130	rs7364083
TMPRSS2	ihs	Botswana.Khoesan	2.28962	21	41472159	rs111671182
TMPRSS2	ihs	Botswana.Khoesan	2.1063	21	41472311	rs28548447
TMPRSS2	ihs	Botswana.Khoesan	-2.77321	21	41473289	rs113288437
TMPRSS2	ihs	Botswana.Khoesan	2.04687	21	41473447	rs2298659
TMPRSS2	ihs	Botswana.Khoesan	2.2185	21	41473562	rs377496737
TMPRSS2	ihs	Botswana.Khoesan	2.2358	21	41473832	rs186100658
TMPRSS2	ihs	Botswana.Khoesan	2.03385	21	41476260	rs2298663
TMPRSS2	ihs	Botswana.Khoesan	-2.21186	21	41476908	rs2094881
TMPRSS2	ihs	Botswana.Khoesan	-2.21186	21	41477170	rs2104810
TMPRSS2	ihs	Botswana.Khoesan	-2.18559	21	41477207	rs8131648
TMPRSS2	ihs	Botswana.Khoesan	-2.18559	21	41477210	rs8131649
TMPRSS2	ihs	Botswana.Khoesan	-2.25168	21	41477315	rs8134203
TMPRSS2	ihs	Botswana.Khoesan	2.87772	21	41477950	rs111870470
TMPRSS2	ihs	Botswana.Khoesan	2.87772	21	41478048	rs112306677
TMPRSS2	ihs	Botswana.Khoesan	2.69071	21	41478118	rs9636988
TMPRSS2	ihs	Botswana.Khoesan	2.02087	21	41478984	rs9974995
TMPRSS2	ihs	Botswana.Khoesan	-2.25574	21	41494180	rs2838042
TMPRSS2	ihs	Botswana.Khoesan	-2.30062	21	41494369	rs3787950
TMPRSS2	ihs	Botswana.Khoesan	-2.11292	21	41511301	rs7277527
TMPRSS2	ihs	Botswana.Khoesan	-2.25982	21	41512659	rs13046567
TMPRSS2	ihs	Botswana.Khoesan	-2.65796	21	41516865	rs7276907
TMPRSS2	ihs	Botswana.Khoesan	-2.17211	21	41519797	rs7282236
TMPRSS2	ihs	Botswana.Khoesan	-2.55166	21	41520548	rs73903409
TMPRSS2	ihs	Botswana.Khoesan	-2.84913	21	41521722	rs371744816
TMPRSS2	ihs	Botswana.Khoesan	2.23925	21	41523938	.
TMPRSS2	ihs	Botswana.Khoesan	2.2335	21	41524171	rs149489375
TMPRSS2	ihs	Botswana.Khoesan	2.69485	21	41524406	rs62219277
TMPRSS2	ihs	Botswana.Khoesan	2.69485	21	41524462	rs2838045
TMPRSS2	ihs	Botswana.Khoesan	2.50108	21	41524593	rs75579634
TMPRSS2	ihs	Botswana.Khoesan	-2.20117	21	41527718	.
TMPRSS2	ihs	Botswana.Khoesan	2.06737	21	41528521	rs181040610
TMPRSS2	ihs	Botswana.Khoesan	2.19478	21	41533130	rs371820674
TMPRSS2	ihs	Botswana.Niger-Kordofanian	2.14419	21	41457774	rs61122608
TMPRSS2	ihs	Botswana.Niger-Kordofanian	2.20625	21	41458295	rs113541580
TMPRSS2	ihs	Botswana.Niger-Kordofanian	-2.71411	21	41459151	rs73372143
TMPRSS2	ihs	Botswana.Niger-Kordofanian	2.01282	21	41463046	rs111370032
TMPRSS2	ihs	Botswana.Niger-Kordofanian	2.38524	21	41465040	rs17001042
TMPRSS2	ihs	Botswana.Niger-Kordofanian	2.04524	21	41466342	rs79971314
TMPRSS2	ihs	Botswana.Niger-Kordofanian	2.10887	21	41466352	rs73372161
TMPRSS2	ihs	Botswana.Niger-Kordofanian	2.11386	21	41467117	rs113562865
TMPRSS2	ihs	Botswana.Niger-Kordofanian	2.14157	21	41468641	rs73372170
TMPRSS2	ihs	Botswana.Niger-Kordofanian	2.22028	21	41469406	rs7278627
TMPRSS2	ihs	Botswana.Niger-Kordofanian	2.17492	21	41470927	rs465576
TMPRSS2	ihs	Botswana.Niger-Kordofanian	2.24879	21	41472990	rs73372182
TMPRSS2	ihs	Botswana.Niger-Kordofanian	-2.03895	21	41473456	rs17854725
TMPRSS2	ihs	Botswana.Niger-Kordofanian	2.37702	21	41474289	rs114995011
TMPRSS2	ihs	Botswana.Niger-Kordofanian	-2.08874	21	41475808	rs3787946
TMPRSS2	ihs	Botswana.Niger-Kordofanian	2.72282	21	41477301	rs58978895
TMPRSS2	ihs	Botswana.Niger-Kordofanian	2.95141	21	41478955	rs73372191
TMPRSS2	ihs	Botswana.Niger-Kordofanian	2.94473	21	41479039	rs73372193
TMPRSS2	ihs	Botswana.Niger-Kordofanian	2.00054	21	41485375	rs4818240
TMPRSS2	ihs	Botswana.Niger-Kordofanian	-2.71118	21	41485517	rs4816720
TMPRSS2	ihs	Botswana.Niger-Kordofanian	2.8909	21	41526275	rs148034673
TMPRSS2	ihs	Botswana.Niger-Kordofanian	2.33895	21	41532657	rs73359718
TMPRSS2	ihs	Ethiopia.Afroasiatic	2.46359	21	41472311	rs28548447
TMPRSS2	ihs	Ethiopia.Afroasiatic	-2.6844	21	41517170	rs66953820
TMPRSS2	ihs	Ethiopia.Afroasiatic	-2.43281	21	41517279	rs73230101
TMPRSS2	ihs	Ethiopia.Afroasiatic	2.60647	21	41517483	rs112714648
TMPRSS2	ihs	Ethiopia.Afroasiatic	2.24813	21	41517922	rs10211876
TMPRSS2	ihs	Ethiopia.Afroasiatic	2.24813	21	41518235	rs7281696
TMPRSS2	ihs	Ethiopia.Afroasiatic	2.24813	21	41518617	rs2210283
TMPRSS2	ihs	Ethiopia.Afroasiatic	2.13233	21	41519495	rs56134964
TMPRSS2	ihs	Ethiopia.Afroasiatic	2.15419	21	41519531	rs12482673
TMPRSS2	ihs	Ethiopia.Afroasiatic	2.22209	21	41521881	rs56095453
TMPRSS2	ihs	Cameroon.Pygmy	-2.28758	21	41454624	rs467593
TMPRSS2	ihs	Cameroon.Pygmy	2.74287	21	41518062	.
TMPRSS2	ihs	Cameroon.Pygmy	2.48141	21	41518131	.
TMPRSS2	ihs	Cameroon.Pygmy	2.41026	21	41519371	.
TMPRSS2	ihs	Cameroon.Pygmy	2.28964	21	41520716	.
TMPRSS2	ihs	Cameroon.Pygmy	2.45446	21	41524421	.
TMPRSS2	ihs	Cameroon.Pygmy	2.30799	21	41524593	rs75579634
TMPRSS2	ihs	Cameroon.Pygmy	2.22482	21	41528054	.
TMPRSS2	ihs	Cameroon.Pygmy	2.19355	21	41532309	.
TMPRSS2	ihs	Ethiopia.Niolo-Saharan	-2.02763	21	41458974	rs60687893
TMPRSS2	ihs	Ethiopia.Niolo-Saharan	-2.02763	21	41458975	rs55992492
TMPRSS2	ihs	Ethiopia.Niolo-Saharan	-2.47798	21	41459151	rs73372143
TMPRSS2	ihs	Ethiopia.Niolo-Saharan	2.22497	21	41465106	rs189546747
TMPRSS2	ihs	Ethiopia.Niolo-Saharan	2.14225	21	41466342	rs79971314
TMPRSS2	ihs	Ethiopia.Niolo-Saharan	-2.28526	21	41466496	rs61459778
TMPRSS2	ihs	Ethiopia.Niolo-Saharan	-2.35869	21	41470061	rs2070788
TMPRSS2	ihs	Ethiopia.Niolo-Saharan	2.78247	21	41472130	rs7364083
TMPRSS2	ihs	Ethiopia.Niolo-Saharan	2.1602	21	41472990	rs73372182
TMPRSS2	ihs	Ethiopia.Niolo-Saharan	-2.54078	21	41473456	rs17854725
TMPRSS2	ihs	Ethiopia.Niolo-Saharan	2.24849	21	41473706	rs2298660
TMPRSS2	ihs	Ethiopia.Niolo-Saharan	2.06419	21	41476757	rs9985159
TMPRSS2	ihs	Ethiopia.Niolo-Saharan	2.81034	21	41477301	rs58978895
TMPRSS2	ihs	Ethiopia.Niolo-Saharan	2.77266	21	41478955	rs73372191
TMPRSS2	ihs	Ethiopia.Niolo-Saharan	2.77266	21	41479039	rs73372193
TMPRSS2	ihs	Ethiopia.Niolo-Saharan	-2.3286	21	41485517	rs4816720
TMPRSS2	ihs	Ethiopia.Niolo-Saharan	-2.07777	21	41489405	rs429442
TMPRSS2	ihs	Tanzania.Hadzabe	-2.31834	21	41459666	rs28526490
TMPRSS2	ihs	Tanzania.Hadzabe	-2.34644	21	41459983	rs13433394
TMPRSS2	ihs	Tanzania.Hadzabe	-2.36555	21	41460237	rs8127290
TMPRSS2	ihs	Tanzania.Hadzabe	-2.36555	21	41460542	rs1548707
TMPRSS2	ihs	Tanzania.Hadzabe	2.05816	21	41460869	rs8128997
TMPRSS2	ihs	Cameroon.Fulani	2.24372	21	41472311	rs28548447
TMPRSS2	ihs	Cameroon.Fulani	2.89704	21	41474289	rs114995011
TMPRSS2	ihs	Cameroon.Fulani	-2.25799	21	41495740	rs58146697
TMPRSS2	ihs	Cameroon.Fulani	2.0018	21	41530589	.
TMPRSS2	ihs	Tanzania.Sandawe	-2.56815	21	41517279	rs73230101
TMPRSS2	ihs	Tanzania.Sandawe	2.16204	21	41517922	rs10211876
TMPRSS2	ihs	Tanzania.Sandawe	2.16204	21	41518235	rs7281696
TMPRSS2	ihs	Tanzania.Sandawe	2.16204	21	41518617	rs2210283
TMPRSS2	ihs	Tanzania.Sandawe	2.361	21	41519531	rs12482673
TMPRSS2	ihs	Ethiopia.Sabue	2.04785	21	41455182	rs149338121
TMPRSS2	ihs	Ethiopia.Sabue	2.01339	21	41458733	rs150969307
TMPRSS2	ihs	Ethiopia.Sabue	2.02298	21	41460483	rs115211666
TMPRSS2	ihs	Ethiopia.Sabue	2.19174	21	41460508	rs118164890
TMPRSS2	ihs	Ethiopia.Sabue	2.11932	21	41467665	.
TMPRSS2	ihs	Ethiopia.Sabue	2.54279	21	41468245	rs743542
TMPRSS2	ihs	Ethiopia.Sabue	2.03812	21	41469146	rs115774576
TMPRSS2	ihs	Ethiopia.Sabue	2.03812	21	41469201	rs114549926
TMPRSS2	ihs	Ethiopia.Sabue	2.03683	21	41469407	rs149109132
TMPRSS2	ihs	Ethiopia.Sabue	2.29694	21	41469748	rs2070791
TMPRSS2	ihs	Ethiopia.Sabue	2.16676	21	41470024	.
TMPRSS2	ihs	Ethiopia.Sabue	2.94788	21	41473447	rs2298659
TMPRSS2	ihs	Ethiopia.Sabue	-2.5816	21	41474289	rs114995011
TMPRSS2	ihs	Ethiopia.Sabue	2.36018	21	41475982	rs368735421
TMPRSS2	ihs	Ethiopia.Sabue	2.34295	21	41476444	rs113034290
TMPRSS2	ihs	Ethiopia.Sabue	2.34295	21	41476471	rs111383922
TMPRSS2	ihs	Ethiopia.Sabue	2.16046	21	41479207	rs141788162
TMPRSS2	ihs	Ethiopia.Sabue	2.03532	21	41479527	rs915823
TMPRSS2	ihs	Ethiopia.Sabue	-2.57975	21	41524852	rs73231913
TMPRSS2	ihs	Ethiopia.Sabue	-2.46226	21	41527650	rs114668878
TMPRSS2	ihs	Ethiopia.Sabue	-2.46226	21	41527658	rs79244027
TMPRSS2	ihs	Ethiopia.Sabue	2.12724	21	41529058	rs188011118
TMPRSS2	ihs	Ethiopia.Sabue	2.20307	21	41529575	rs149110927
TMPRSS2	ihs	Ethiopia.Sabue	2.0928	21	41529948	rs143146719
TMPRSS2	ihs	Ethiopia.Sabue	2.03184	21	41538855	rs73903418
TMPRSS2	ihs	Ethiopia.Sabue	2.18708	21	41540845	.
LY6E	ihs	EAS	-2.58722	8	143016954	rs74763626
LY6E	ihs	EUR	-2.41184	8	143026424	rs4338085
LY6E	ihs	EUR	2.058	8	143026560	rs10283236
LY6E	ihs	AFR	-2.05751	8	143015201	rs180931309
LY6E	ihs	AFR	-2.05178	8	143015960	rs62525087
LY6E	ihs	AMR	-2.41062	8	143014573	rs111226398
LY6E	ihs	Tanzania.Afroasiatic	2.08836	8	143029610	rs11136293
LY6E	ihs	Botswana.Khoesan	-2.09491	8	143007982	rs4538851
LY6E	ihs	Botswana.Khoesan	-2.10829	8	143029610	rs11136293
LY6E	ihs	Tanzania.Hadzabe	-2.0712	8	143022896	rs4483136
LY6E	ihs	Tanzania.Hadzabe	-2.94568	8	143024313	.
LY6E	ihs	Tanzania.Hadzabe	2.41823	8	143030309	rs141786573
LY6E	ihs	Tanzania.Hadzabe	2.43272	8	143030902	rs369409154
LY6E	ihs	Ethiopia.Sabue	-2.29002	8	143017718	rs13252864
LY6E	ihs	Ethiopia.Sabue	-2.19317	8	143019697	rs58558679
LY6E	ihs	Ethiopia.Sabue	-2.24099	8	143022018	rs4464948
LY6E	ihs	Ethiopia.Sabue	-2.17178	8	143023156	rs11787222
LY6E	ihs	Ethiopia.Sabue	-2.17504	8	143024892	rs13439114
LY6E	ihs	Ethiopia.Sabue	-2.07603	8	143029210	rs6558360
LY6E	ihs	Ethiopia.Sabue	-2.65962	8	143033391	rs139204769
DDP4	ihs	AMR	2.09109	2	162010482	rs2389643
DDP4	ihs	SAS	-2.24937	2	162028940	rs2268888
DDP4	ihs	Kenya.Afroasiatic	-2.28101	2	162028940	rs2268888
DDP4	ihs	Botswana.Khoesan	2.35878	2	162011112	rs10166124
DDP4	ihs	Botswana.Khoesan	2.41899	2	162031459	rs2284872
DDP4	ihs	Botswana.Khoesan	-2.05422	2	162032217	rs2284870
DDP4	ihs	Botswana.Khoesan	-2.26439	2	162033707	rs7608798
DDP4	ihs	Botswana.Khoesan	2.82975	2	162034565	rs2160927
DDP4	ihs	Botswana.Khoesan	2.46769	2	162038256	rs10930040
DDP4	ihs	Botswana.Khoesan	-2.68173	2	162053713	rs6741949
DDP4	ihs	Botswana.Khoesan	2.13084	2	162053893	rs4664446
DDP4	ihs	Cameroon.Pygmy	-2.25346	2	162054002	rs73009113
ACE2	ihs	AFR	2.1477	X	15641536	rs142076088
ACE2	ihs	AFR	2.14214	X	15642742	rs5935998
ACE2	ihs	AFR	2.70665	X	15648189	rs142828634
ACE2	ihs	AFR	2.27022	X	15648541	rs139386730
ACE2	ihs	AFR	2.21839	X	15650383	rs147797542
ACE2	ihs	AFR	3.0704	X	15651193	rs144897130
ACE2	ihs	AFR	2.3613	X	15651754	rs148144707
ACE2	ihs	AFR	3.02167	X	15651758	rs144030887
ACE2	ihs	AFR	2.27173	X	15652892	rs187076032
ACE2	ihs	AFR	2.52749	X	15653815	rs112442923
ACE2	ihs	AFR	2.34068	X	15658190	rs139890252
ACE2	ihs	AFR	2.80904	X	15663429	rs113049740
ACE2	ihs	AFR	2.04407	X	15667094	rs5936008
ACE2	ihs	AFR	2.04429	X	15667470	rs111608093
ACE2	ihs	AFR	2.04429	X	15667545	rs73437956
ACE2	ihs	AFR	2.08738	X	15668281	rs12009633
ACE2	ihs	AFR	2.11449	X	15668702	rs114187860
ACE2	ihs	AFR	2.28568	X	15670706	rs145351727
ACE2	ihs	AFR	2.04	X	15670774	rs113650825
ACE2	ihs	AFR	2.08044	X	15673621	rs112815776
ACE2	ihs	AFR	2.07479	X	15674077	rs147459468
ACE2	ihs	AFR	2.86027	X	15675216	rs143069705
ACE2	ihs	AFR	-2.37166	X	15679923	rs5936011
ACE2	ihs	AFR	2.57881	X	15682995	rs4830984
ACE2	ihs	AFR	2.75322	X	15686253	rs148904296
ACE2	ihs	AFR	2.01806	X	15687514	rs16980088
ACE2	ihs	AFR	2.75426	X	15687731	rs7889144
ACE2	ihs	AFR	3.14941	X	15688395	rs4830986
ACE2	ihs	AFR	3.05898	X	15694133	rs113407381
ACE2	ihs	AFR	2.71517	X	15695698	rs111608497
ACE2	ihs	AFR	3.12502	X	15695809	rs138511492
ACE2	ihs	AFR	2.7723	X	15696505	rs112176889
ACE2	ihs	AFR	2.88721	X	15699142	rs140499330
ACE2	ihs	AFR	2.27304	X	15699516	rs115034067
ACE2	ihs	AFR	-2.80805	X	15700755	rs5936018
ACE2	ihs	AFR	2.27261	X	15701429	rs144448314
ACE2	ihs	AFR	3.18279	X	15702717	rs139204673
ACE2	ihs	AFR	-2.75906	X	15703697	rs202238757
ACE2	ihs	AFR	-2.78492	X	15705022	rs5936019
ACE2	ihs	AFR	3.35375	X	15705433	rs114533415
ACE2	ihs	AFR	3.27074	X	15705586	rs2090196
ACE2	ihs	AFR	2.87149	X	15708323	rs5936022
ACE2	ihs	AFR	2.77813	X	15712135	rs7886191
ACE2	ihs	AFR	2.24482	X	15712496	rs1515008
ACE2	ihs	AFR	2.24192	X	15713643	rs2012671
ACE2	ihs	AFR	2.16614	X	15715871	rs5934269
ACE2	ihs	AFR	2.77028	X	15718122	rs1849863
ACE2	ihs	AMR	2.38549	X	15629209	rs17264937
ACE2	ihs	AMR	2.13051	X	15642742	rs5935998
ACE2	ihs	AMR	2.10856	X	15646263	rs5934255
ACE2	ihs	AMR	2.71328	X	15680935	rs138133625
ACE2	ihs	Kenya.Nilo-Saharan	2.67987	X	15626550	rs148374453
ACE2	ihs	Kenya.Nilo-Saharan	-2.3883	X	15629578	rs2106806
ACE2	ihs	Kenya.Nilo-Saharan	2.77005	X	15630920	rs149000434
ACE2	ihs	Kenya.Nilo-Saharan	2.3515	X	15635868	rs6632684
ACE2	ihs	Kenya.Nilo-Saharan	2.3515	X	15637334	rs5935996
ACE2	ihs	Kenya.Nilo-Saharan	2.41962	X	15640647	rs41492646
ACE2	ihs	Kenya.Nilo-Saharan	2.10499	X	15642742	rs5935998
ACE2	ihs	Kenya.Nilo-Saharan	2.00087	X	15646446	rs192611572
ACE2	ihs	Kenya.Nilo-Saharan	-2.11575	X	15646921	rs5934256
ACE2	ihs	Kenya.Nilo-Saharan	2.94801	X	15648189	rs142828634
ACE2	ihs	Kenya.Nilo-Saharan	2.13088	X	15648541	rs139386730
ACE2	ihs	Kenya.Nilo-Saharan	3.15013	X	15650207	rs111792076
ACE2	ihs	Kenya.Nilo-Saharan	2.13961	X	15650383	rs147797542
ACE2	ihs	Kenya.Nilo-Saharan	3.1088	X	15654183	rs5934258
ACE2	ihs	Kenya.Nilo-Saharan	-2.21241	X	15655444	rs4830971
ACE2	ihs	Kenya.Nilo-Saharan	-2.21241	X	15655746	rs4830972
ACE2	ihs	Kenya.Nilo-Saharan	2.08678	X	15657187	rs6632698
ACE2	ihs	Kenya.Nilo-Saharan	2.11213	X	15662415	rs113940780
ACE2	ihs	Kenya.Nilo-Saharan	2.31477	X	15665127	rs16980061
ACE2	ihs	Kenya.Nilo-Saharan	2.26127	X	15666122	rs6629118
ACE2	ihs	Kenya.Nilo-Saharan	2.40318	X	15667094	rs5936008
ACE2	ihs	Kenya.Nilo-Saharan	2.35686	X	15667470	rs111608093
ACE2	ihs	Kenya.Nilo-Saharan	2.40948	X	15667545	rs73437956
ACE2	ihs	Kenya.Nilo-Saharan	2.09255	X	15668094	rs111718431
ACE2	ihs	Kenya.Nilo-Saharan	2.6665	X	15670706	rs145351727
ACE2	ihs	Kenya.Nilo-Saharan	2.46713	X	15671816	rs5936009
ACE2	ihs	Kenya.Nilo-Saharan	2.01166	X	15673621	rs112815776
ACE2	ihs	Kenya.Nilo-Saharan	2.01186	X	15674077	rs147459468
ACE2	ihs	Kenya.Nilo-Saharan	2.291	X	15674842	rs145194974
ACE2	ihs	Kenya.Nilo-Saharan	-2.30416	X	15679923	rs5936011
ACE2	ihs	Kenya.Nilo-Saharan	2.40604	X	15681200	rs2056086
ACE2	ihs	Kenya.Nilo-Saharan	-2.84861	X	15682937	rs4830983
ACE2	ihs	Kenya.Nilo-Saharan	2.11627	X	15682995	rs4830984
ACE2	ihs	Kenya.Nilo-Saharan	2.47699	X	15685387	rs5934265
ACE2	ihs	Kenya.Nilo-Saharan	2.33821	X	15688395	rs4830986
ACE2	ihs	Kenya.Nilo-Saharan	2.42544	X	15689430	rs6632711
ACE2	ihs	Kenya.Nilo-Saharan	2.02328	X	15691261	rs112162956
ACE2	ihs	Kenya.Nilo-Saharan	2.39123	X	15692108	rs5936012
ACE2	ihs	Kenya.Nilo-Saharan	2.44738	X	15693441	rs6629120
ACE2	ihs	Kenya.Nilo-Saharan	2.84622	X	15694338	rs113285112
ACE2	ihs	Kenya.Nilo-Saharan	2.84622	X	15694508	rs73437982
ACE2	ihs	Kenya.Nilo-Saharan	2.84622	X	15694665	rs59765556
ACE2	ihs	Kenya.Nilo-Saharan	2.55153	X	15695947	rs144118118
ACE2	ihs	Kenya.Nilo-Saharan	2.31169	X	15696773	rs5934266
ACE2	ihs	Kenya.Nilo-Saharan	2.15217	X	15699142	rs140499330
ACE2	ihs	Kenya.Nilo-Saharan	2.38861	X	15700641	rs146897505
ACE2	ihs	Kenya.Nilo-Saharan	2.36166	X	15705586	rs2090196
ACE2	ihs	Kenya.Nilo-Saharan	2.62382	X	15712135	rs7886191
ACE2	ihs	Kenya.Nilo-Saharan	2.10768	X	15715875	rs5936025
ACE2	ihs	Kenya.Nilo-Saharan	2.69695	X	15717808	rs73439920
ACE2	ihs	Kenya.Nilo-Saharan	2.20598	X	15718633	rs6632722
ACE2	ihs	Kenya.Nilo-Saharan	2.02657	X	15749596	rs12845078
ACE2	ihs	Cameroon.NigerKordofanian	2.0698	X	15639380	rs113504265
ACE2	ihs	Cameroon.NigerKordofanian	2.06977	X	15640253	rs113974458
ACE2	ihs	Cameroon.NigerKordofanian	2.09336	X	15646927	rs111859119
ACE2	ihs	Cameroon.NigerKordofanian	2.70361	X	15648189	rs142828634
ACE2	ihs	Cameroon.NigerKordofanian	2.87301	X	15650207	rs111792076
ACE2	ihs	Cameroon.NigerKordofanian	3.26918	X	15650998	rs142593721
ACE2	ihs	Cameroon.NigerKordofanian	3.05661	X	15651754	rs148144707
ACE2	ihs	Cameroon.NigerKordofanian	2.81102	X	15651758	rs144030887
ACE2	ihs	Cameroon.NigerKordofanian	-2.07217	X	15654035	rs5934257
ACE2	ihs	Cameroon.NigerKordofanian	2.80613	X	15662415	rs113940780
ACE2	ihs	Cameroon.NigerKordofanian	3.07387	X	15665127	rs16980061
ACE2	ihs	Cameroon.NigerKordofanian	2.6062	X	15668094	rs111718431
ACE2	ihs	Cameroon.NigerKordofanian	2.61618	X	15668281	rs12009633
ACE2	ihs	Cameroon.NigerKordofanian	3.1832	X	15670649	rs150025182
ACE2	ihs	Cameroon.NigerKordofanian	2.97638	X	15670706	rs145351727
ACE2	ihs	Cameroon.NigerKordofanian	2.97638	X	15670774	rs113650825
ACE2	ihs	Cameroon.NigerKordofanian	2.79166	X	15673621	rs112815776
ACE2	ihs	Cameroon.NigerKordofanian	2.79187	X	15674077	rs147459468
ACE2	ihs	Cameroon.NigerKordofanian	2.79187	X	15674332	rs112858206
ACE2	ihs	Cameroon.NigerKordofanian	2.39222	X	15675216	rs143069705
ACE2	ihs	Cameroon.NigerKordofanian	2.75198	X	15678551	rs144528114
ACE2	ihs	Cameroon.NigerKordofanian	2.75182	X	15680772	rs112813093
ACE2	ihs	Cameroon.NigerKordofanian	2.02456	X	15682995	rs4830984
ACE2	ihs	Cameroon.NigerKordofanian	2.70386	X	15686253	rs148904296
ACE2	ihs	Cameroon.NigerKordofanian	2.07497	X	15687018	rs12011097
ACE2	ihs	Cameroon.NigerKordofanian	2.70463	X	15687731	rs7889144
ACE2	ihs	Cameroon.NigerKordofanian	2.08303	X	15688395	rs4830986
ACE2	ihs	Cameroon.NigerKordofanian	2.8442	X	15691224	rs112497164
ACE2	ihs	Cameroon.NigerKordofanian	2.8442	X	15691261	rs112162956
ACE2	ihs	Cameroon.NigerKordofanian	2.07646	X	15691274	rs12012003
ACE2	ihs	Cameroon.NigerKordofanian	2.07585	X	15691762	rs148354727
ACE2	ihs	Cameroon.NigerKordofanian	2.70161	X	15694133	rs113407381
ACE2	ihs	Cameroon.NigerKordofanian	2.41789	X	15694338	rs113285112
ACE2	ihs	Cameroon.NigerKordofanian	2.41789	X	15694508	rs73437982
ACE2	ihs	Cameroon.NigerKordofanian	2.41789	X	15694665	rs59765556
ACE2	ihs	Cameroon.NigerKordofanian	2.73349	X	15695947	rs144118118
ACE2	ihs	Cameroon.NigerKordofanian	2.73105	X	15700641	rs146897505
ACE2	ihs	Cameroon.NigerKordofanian	-2.28744	X	15700755	rs5936018
ACE2	ihs	Cameroon.NigerKordofanian	-2.27491	X	15705022	rs5936019
ACE2	ihs	Cameroon.NigerKordofanian	2.51958	X	15707316	rs145963238
ACE2	ihs	Cameroon.NigerKordofanian	2.0939	X	15712135	rs7886191
ACE2	ihs	Cameroon.NigerKordofanian	2.01342	X	15717808	rs73439920
ACE2	ihs	Tanzania.Afroasiatic	-2.07147	X	15559782	rs58967744
ACE2	ihs	Tanzania.Afroasiatic	-2.05867	X	15564624	rs1514283
ACE2	ihs	Tanzania.Afroasiatic	-2.05867	X	15564640	rs1514282
ACE2	ihs	Tanzania.Afroasiatic	-2.05867	X	15564663	rs1514281
ACE2	ihs	Tanzania.Afroasiatic	-2.34086	X	15570905	rs4646171
ACE2	ihs	Tanzania.Afroasiatic	-2.03117	X	15571498	rs4646170
ACE2	ihs	Tanzania.Afroasiatic	-2.03117	X	15571602	rs4646168
ACE2	ihs	Tanzania.Afroasiatic	-2.3234	X	15571997	rs2301692
ACE2	ihs	Tanzania.Afroasiatic	-2.3234	X	15572069	rs2301693
ACE2	ihs	Tanzania.Afroasiatic	2.34348	X	15662004	.
ACE2	ihs	Tanzania.Afroasiatic	-2.30096	X	15679923	rs5936011
ACE2	ihs	Tanzania.Afroasiatic	-2.64987	X	15682937	rs4830983
ACE2	ihs	Tanzania.Afroasiatic	-2.42301	X	15700755	rs5936018
ACE2	ihs	Tanzania.Afroasiatic	-2.39931	X	15705022	rs5936019
ACE2	ihs	Tanzania.Afroasiatic	2.15805	X	15705586	rs2090196
ACE2	ihs	Tanzania.Afroasiatic	2.36009	X	15708323	rs5936022
ACE2	ihs	Tanzania.Afroasiatic	2.46803	X	15718122	rs1849863
ACE2	ihs	Kenya.Afroasiatic	2.26265	X	15626550	rs148374453
ACE2	ihs	Kenya.Afroasiatic	2.31423	X	15630920	rs149000434
ACE2	ihs	Kenya.Afroasiatic	2.09609	X	15635868	rs6632684
ACE2	ihs	Kenya.Afroasiatic	2.09619	X	15637334	rs5935996
ACE2	ihs	Kenya.Afroasiatic	2.09911	X	15640647	rs41492646
ACE2	ihs	Kenya.Afroasiatic	2.00137	X	15647529	rs191689158
ACE2	ihs	Kenya.Afroasiatic	2.13635	X	15648432	rs6632690
ACE2	ihs	Kenya.Afroasiatic	2.13635	X	15648501	rs6632691
ACE2	ihs	Kenya.Afroasiatic	2.72221	X	15648541	rs139386730
ACE2	ihs	Kenya.Afroasiatic	2.65594	X	15649892	rs147131294
ACE2	ihs	Kenya.Afroasiatic	3.29142	X	15650009	rs6629114
ACE2	ihs	Kenya.Afroasiatic	2.72536	X	15650383	rs147797542
ACE2	ihs	Kenya.Afroasiatic	2.13568	X	15651136	rs5936003
ACE2	ihs	Kenya.Afroasiatic	2.65948	X	15651326	rs138777083
ACE2	ihs	Kenya.Afroasiatic	2.13569	X	15651488	rs6629115
ACE2	ihs	Kenya.Afroasiatic	2.13569	X	15651747	rs6632693
ACE2	ihs	Kenya.Afroasiatic	2.6591	X	15652375	rs144194786
ACE2	ihs	Kenya.Afroasiatic	2.7607	X	15653035	rs149910143
ACE2	ihs	Kenya.Afroasiatic	2.3113	X	15653227	rs1877924
ACE2	ihs	Kenya.Afroasiatic	3.05518	X	15654183	rs5934258
ACE2	ihs	Kenya.Afroasiatic	3.07302	X	15654681	rs6632695
ACE2	ihs	Kenya.Afroasiatic	2.23569	X	15654938	rs148304753
ACE2	ihs	Kenya.Afroasiatic	2.89789	X	15657187	rs6632698
ACE2	ihs	Kenya.Afroasiatic	2.55405	X	15658741	rs5936005
ACE2	ihs	Kenya.Afroasiatic	2.63357	X	15660047	rs142446231
ACE2	ihs	Kenya.Afroasiatic	2.21101	X	15660409	rs59305994
ACE2	ihs	Kenya.Afroasiatic	2.21101	X	15661012	rs143279759
ACE2	ihs	Kenya.Afroasiatic	2.3448	X	15661440	rs5934261
ACE2	ihs	Kenya.Afroasiatic	2.50413	X	15664416	rs113351343
ACE2	ihs	Kenya.Afroasiatic	2.5686	X	15665613	rs56821287
ACE2	ihs	Kenya.Afroasiatic	3.2018	X	15666122	rs6629118
ACE2	ihs	Kenya.Afroasiatic	2.3305	X	15666354	rs141726386
ACE2	ihs	Kenya.Afroasiatic	3.27973	X	15667094	rs5936008
ACE2	ihs	Kenya.Afroasiatic	3.27991	X	15667470	rs111608093
ACE2	ihs	Kenya.Afroasiatic	3.27991	X	15667545	rs73437956
ACE2	ihs	Kenya.Afroasiatic	2.90749	X	15668176	rs6632704
ACE2	ihs	Kenya.Afroasiatic	2.51707	X	15668281	rs12009633
ACE2	ihs	Kenya.Afroasiatic	2.41634	X	15670096	rs12011919
ACE2	ihs	Kenya.Afroasiatic	3.41032	X	15671816	rs5936009
ACE2	ihs	Kenya.Afroasiatic	3.21403	X	15674766	rs5936010
ACE2	ihs	Kenya.Afroasiatic	2.45897	X	15675171	rs149050888
ACE2	ihs	Kenya.Afroasiatic	3.21403	X	15675734	rs5934263
ACE2	ihs	Kenya.Afroasiatic	2.45895	X	15675988	rs12012790
ACE2	ihs	Kenya.Afroasiatic	3.21361	X	15676365	rs997300
ACE2	ihs	Kenya.Afroasiatic	2.0027	X	15676654	rs10521649
ACE2	ihs	Kenya.Afroasiatic	2.45874	X	15678255	rs60791663
ACE2	ihs	Kenya.Afroasiatic	2.45874	X	15679708	rs151124930
ACE2	ihs	Kenya.Afroasiatic	3.45052	X	15681200	rs2056086
ACE2	ihs	Kenya.Afroasiatic	2.45787	X	15681645	rs146110919
ACE2	ihs	Kenya.Afroasiatic	3.21274	X	15682709	rs4830981
ACE2	ihs	Kenya.Afroasiatic	-2.59502	X	15682937	rs4830983
ACE2	ihs	Kenya.Afroasiatic	2.45885	X	15683346	rs146353460
ACE2	ihs	Kenya.Afroasiatic	3.21305	X	15683622	rs4830985
ACE2	ihs	Kenya.Afroasiatic	3.45249	X	15685387	rs5934265
ACE2	ihs	Kenya.Afroasiatic	2.45746	X	15685928	rs150151534
ACE2	ihs	Kenya.Afroasiatic	3.12108	X	15686359	rs143224233
ACE2	ihs	Kenya.Afroasiatic	2.83571	X	15687018	rs12011097
ACE2	ihs	Kenya.Afroasiatic	2.43752	X	15687412	rs60376180
ACE2	ihs	Kenya.Afroasiatic	2.61724	X	15688707	rs4060
ACE2	ihs	Kenya.Afroasiatic	3.4595	X	15689430	rs6632711
ACE2	ihs	Kenya.Afroasiatic	3.22389	X	15691078	rs6632713
ACE2	ihs	Kenya.Afroasiatic	2.82996	X	15691274	rs12012003
ACE2	ihs	Kenya.Afroasiatic	3.22494	X	15691331	rs6629119
ACE2	ihs	Kenya.Afroasiatic	2.83013	X	15691762	rs148354727
ACE2	ihs	Kenya.Afroasiatic	3.42	X	15692108	rs5936012
ACE2	ihs	Kenya.Afroasiatic	3.41964	X	15693441	rs6629120
ACE2	ihs	Kenya.Afroasiatic	3.16031	X	15693789	rs7062378
ACE2	ihs	Kenya.Afroasiatic	2.96801	X	15695950	rs5936013
ACE2	ihs	Kenya.Afroasiatic	3.32334	X	15696773	rs5934266
ACE2	ihs	Kenya.Afroasiatic	3.00908	X	15698322	rs5936015
ACE2	ihs	Kenya.Afroasiatic	3.05843	X	15702624	.
ACE2	ihs	Kenya.Afroasiatic	2.39805	X	15704989	rs148945721
ACE2	ihs	Kenya.Afroasiatic	2.94297	X	15705881	rs5934268
ACE2	ihs	Kenya.Afroasiatic	2.39694	X	15706769	rs137922833
ACE2	ihs	Kenya.Afroasiatic	2.48322	X	15707316	rs145963238
ACE2	ihs	Kenya.Afroasiatic	2.51275	X	15709854	rs5936023
ACE2	ihs	Kenya.Afroasiatic	2.55143	X	15711845	rs5936024
ACE2	ihs	Kenya.Afroasiatic	2.55143	X	15712496	rs1515008
ACE2	ihs	Kenya.Afroasiatic	2.25715	X	15712835	rs12012559
ACE2	ihs	Kenya.Afroasiatic	2.549	X	15713643	rs2012671
ACE2	ihs	Kenya.Afroasiatic	2.549	X	15715871	rs5934269
ACE2	ihs	Kenya.Afroasiatic	2.61343	X	15715875	rs5936025
ACE2	ihs	Kenya.Afroasiatic	2.02555	X	15716127	rs151283793
ACE2	ihs	Kenya.Afroasiatic	2.25939	X	15718102	rs113770253
ACE2	ihs	Kenya.Afroasiatic	2.52612	X	15718633	rs6632722
ACE2	ihs	Kenya.Afroasiatic	2.01695	X	15718891	rs150142172
ACE2	ihs	Kenya.Afroasiatic	2.07784	X	15719928	rs142918994
ACE2	ihs	Kenya.Afroasiatic	2.07784	X	15719989	rs147236895
ACE2	ihs	Kenya.Afroasiatic	2.98592	X	15749596	rs12845078
ACE2	ihs	Botswana.Khoesan	2.15657	X	15558483	rs4830542
ACE2	ihs	Botswana.Khoesan	-2.13229	X	15564624	rs1514283
ACE2	ihs	Botswana.Khoesan	-2.13229	X	15564640	rs1514282
ACE2	ihs	Botswana.Khoesan	-2.13229	X	15564663	rs1514281
ACE2	ihs	Botswana.Khoesan	-2.0786	X	15601694	rs111572878
ACE2	ihs	Botswana.Khoesan	-2.11891	X	15603630	rs9698134
ACE2	ihs	Botswana.Khoesan	-2.11891	X	15603654	rs9698150
ACE2	ihs	Botswana.Khoesan	-2.34743	X	15603756	rs112593415
ACE2	ihs	Botswana.Khoesan	-2.34743	X	15604119	rs16997083
ACE2	ihs	Botswana.Khoesan	-2.34743	X	15604254	rs111515287
ACE2	ihs	Botswana.Khoesan	-2.34743	X	15604894	rs16997089
ACE2	ihs	Botswana.Khoesan	-2.34743	X	15605251	rs112312217
ACE2	ihs	Botswana.Khoesan	-2.34743	X	15605819	rs111719883
ACE2	ihs	Botswana.Khoesan	-2.34743	X	15607234	rs150147953
ACE2	ihs	Botswana.Khoesan	-2.33486	X	15607916	rs113653961
ACE2	ihs	Botswana.Khoesan	-2.33486	X	15608044	rs113539251
ACE2	ihs	Botswana.Khoesan	-2.33486	X	15609231	rs112062094
ACE2	ihs	Botswana.Khoesan	-2.33486	X	15609460	rs111471604
ACE2	ihs	Botswana.Khoesan	2.42352	X	15611318	rs2097723
ACE2	ihs	Botswana.Khoesan	-2.28458	X	15611625	rs16997094
ACE2	ihs	Botswana.Khoesan	-2.38645	X	15614776	rs16980023
ACE2	ihs	Botswana.Khoesan	-2.38645	X	15616671	rs6632681
ACE2	ihs	Botswana.Khoesan	2.35209	X	15618418	rs12007623
ACE2	ihs	Botswana.Khoesan	2.34252	X	15621438	rs1548474
ACE2	ihs	Botswana.Khoesan	2.3406	X	15624289	rs1356037
ACE2	ihs	Botswana.Khoesan	2.25526	X	15625156	rs6629110
ACE2	ihs	Botswana.Khoesan	-2.00345	X	15625544	rs111421969
ACE2	ihs	Botswana.Khoesan	-2.11252	X	15630842	rs12689012
ACE2	ihs	Botswana.Khoesan	-2.05006	X	15631329	rs1515009
ACE2	ihs	Botswana.Khoesan	-2.29527	X	15632163	rs6527618
ACE2	ihs	Botswana.Khoesan	-2.29527	X	15633075	rs6527619
ACE2	ihs	Botswana.Khoesan	-2.29527	X	15633116	rs6527620
ACE2	ihs	Botswana.Khoesan	-2.29527	X	15633251	rs6629111
ACE2	ihs	Botswana.Khoesan	-2.34523	X	15641760	rs6632685
ACE2	ihs	Botswana.Khoesan	-2.34523	X	15641844	rs56137184
ACE2	ihs	Botswana.Khoesan	2.33072	X	15642742	rs5935998
ACE2	ihs	Botswana.Khoesan	-2.33433	X	15643094	rs5935999
ACE2	ihs	Botswana.Khoesan	-2.16338	X	15645250	rs3810721
ACE2	ihs	Botswana.Khoesan	-2.3346	X	15646260	rs6632688
ACE2	ihs	Botswana.Khoesan	2.33526	X	15646263	rs5934255
ACE2	ihs	Botswana.Khoesan	-2.51461	X	15647529	rs191689158
ACE2	ihs	Botswana.Khoesan	-2.98335	X	15647533	rs184785385
ACE2	ihs	Botswana.Khoesan	-2.38006	X	15648432	rs6632690
ACE2	ihs	Botswana.Khoesan	-2.38006	X	15648501	rs6632691
ACE2	ihs	Botswana.Khoesan	-2.41192	X	15651136	rs5936003
ACE2	ihs	Botswana.Khoesan	-2.41175	X	15651488	rs6629115
ACE2	ihs	Botswana.Khoesan	-2.41175	X	15651747	rs6632693
ACE2	ihs	Botswana.Khoesan	-2.8142	X	15653227	rs1877924
ACE2	ihs	Botswana.Khoesan	2.7964	X	15656962	rs4830973
ACE2	ihs	Botswana.Khoesan	2.7964	X	15656998	rs4830543
ACE2	ihs	Botswana.Khoesan	-2.40773	X	15664416	rs113351343
ACE2	ihs	Botswana.Khoesan	-2.45826	X	15665613	rs56821287
ACE2	ihs	Botswana.Khoesan	2.25488	X	15668176	rs6632704
ACE2	ihs	Botswana.Khoesan	-2.63145	X	15674332	rs112858206
ACE2	ihs	Botswana.Khoesan	2.25607	X	15674766	rs5936010
ACE2	ihs	Botswana.Khoesan	2.25607	X	15675734	rs5934263
ACE2	ihs	Botswana.Khoesan	2.25602	X	15676365	rs997300
ACE2	ihs	Botswana.Khoesan	3.83292	X	15676611	.
ACE2	ihs	Botswana.Khoesan	2.27954	X	15682709	rs4830981
ACE2	ihs	Botswana.Khoesan	3.25317	X	15682995	rs4830984
ACE2	ihs	Botswana.Khoesan	2.27696	X	15683622	rs4830985
ACE2	ihs	Botswana.Khoesan	3.58791	X	15688395	rs4830986
ACE2	ihs	Botswana.Khoesan	2.57586	X	15691078	rs6632713
ACE2	ihs	Botswana.Khoesan	-2.48521	X	15691224	rs112497164
ACE2	ihs	Botswana.Khoesan	2.57605	X	15691331	rs6629119
ACE2	ihs	Botswana.Khoesan	2.576	X	15693789	rs7062378
ACE2	ihs	Botswana.Khoesan	2.5625	X	15698322	rs5936015
ACE2	ihs	Botswana.Khoesan	3.21043	X	15705586	rs2090196
ACE2	ihs	Botswana.Khoesan	2.1835	X	15705881	rs5934268
ACE2	ihs	Botswana.Khoesan	2.4426	X	15707807	rs2873135
ACE2	ihs	Botswana.Khoesan	2.4426	X	15708300	rs5936021
ACE2	ihs	Botswana.Khoesan	3.12829	X	15708323	rs5936022
ACE2	ihs	Botswana.Khoesan	2.44088	X	15709365	rs4830546
ACE2	ihs	Botswana.Khoesan	2.24947	X	15709854	rs5936023
ACE2	ihs	Botswana.Khoesan	2.6773	X	15711845	rs5936024
ACE2	ihs	Botswana.Khoesan	3.48037	X	15712198	.
ACE2	ihs	Botswana.Khoesan	2.24725	X	15712496	rs1515008
ACE2	ihs	Botswana.Khoesan	2.47498	X	15713217	rs6527633
ACE2	ihs	Botswana.Khoesan	2.51014	X	15713432	rs1811781
ACE2	ihs	Botswana.Khoesan	2.51014	X	15713496	rs2012660
ACE2	ihs	Botswana.Khoesan	2.50964	X	15715881	rs5936026
ACE2	ihs	Botswana.Khoesan	-2.0897	X	15718102	rs113770253
ACE2	ihs	Botswana.Khoesan	2.75049	X	15718122	rs1849863
ACE2	ihs	Botswana.Khoesan	2.51242	X	15718136	rs1849864
ACE2	ihs	Botswana.Khoesan	-2.46855	X	15741510	rs4830989
ACE2	ihs	Botswana.Niger-Kordofanian	2.01208	X	15624289	rs1356037
ACE2	ihs	Botswana.Niger-Kordofanian	2.3248	X	15650207	rs111792076
ACE2	ihs	Botswana.Niger-Kordofanian	2.23262	X	15653275	rs143407243
ACE2	ihs	Botswana.Niger-Kordofanian	2.53452	X	15682995	rs4830984
ACE2	ihs	Botswana.Niger-Kordofanian	2.55807	X	15688395	rs4830986
ACE2	ihs	Botswana.Niger-Kordofanian	2.56108	X	15692086	rs111786806
ACE2	ihs	Botswana.Niger-Kordofanian	3.01582	X	15694133	rs113407381
ACE2	ihs	Botswana.Niger-Kordofanian	2.50726	X	15694338	rs113285112
ACE2	ihs	Botswana.Niger-Kordofanian	2.50726	X	15694508	rs73437982
ACE2	ihs	Botswana.Niger-Kordofanian	2.50726	X	15694665	rs59765556
ACE2	ihs	Botswana.Niger-Kordofanian	2.38404	X	15705586	rs2090196
ACE2	ihs	Botswana.Niger-Kordofanian	2.76273	X	15712135	rs7886191
ACE2	ihs	Botswana.Niger-Kordofanian	2.17754	X	15717808	rs73439920
ACE2	ihs	Ethiopia.Afroasiatic	-2.10399	X	15626097	rs2158082
ACE2	ihs	Ethiopia.Afroasiatic	-2.38642	X	15629578	rs2106806
ACE2	ihs	Ethiopia.Afroasiatic	-2.15306	X	15646921	rs5934256
ACE2	ihs	Ethiopia.Afroasiatic	-2.21978	X	15655444	rs4830971
ACE2	ihs	Ethiopia.Afroasiatic	-2.21978	X	15655746	rs4830972
ACE2	ihs	Ethiopia.Afroasiatic	2.1231	X	15672259	rs137915929
ACE2	ihs	Ethiopia.Afroasiatic	-2.42226	X	15679923	rs5936011
ACE2	ihs	Ethiopia.Afroasiatic	-2.84139	X	15682937	rs4830983
ACE2	ihs	Ethiopia.Afroasiatic	2.2799	X	15712135	rs7886191
ACE2	ihs	Cameroon.Pygmy	2.19974	X	15624665	rs190048195
ACE2	ihs	Cameroon.Pygmy	2.15311	X	15627422	rs6653979
ACE2	ihs	Ethiopia.Niolo-Saharan	-2.10333	X	15643040	rs5934254
ACE2	ihs	Ethiopia.Niolo-Saharan	-2.63521	X	15654035	rs5934257
ACE2	ihs	Ethiopia.Niolo-Saharan	-2.13198	X	15655180	rs5934259
ACE2	ihs	Ethiopia.Niolo-Saharan	2.36011	X	15665576	.
ACE2	ihs	Ethiopia.Niolo-Saharan	2.47603	X	15668284	rs181733726
ACE2	ihs	Ethiopia.Niolo-Saharan	2.11033	X	15675525	rs185584103
ACE2	ihs	Ethiopia.Niolo-Saharan	2.06739	X	15677230	rs182230783
ACE2	ihs	Ethiopia.Niolo-Saharan	-2.64199	X	15700755	rs5936018
ACE2	ihs	Ethiopia.Niolo-Saharan	-2.49484	X	15705022	rs5936019
ACE2	ihs	Cameroon.Fulani	-2.46537	X	15559782	rs58967744
ACE2	ihs	Cameroon.Fulani	-2.51272	X	15564624	rs1514283
ACE2	ihs	Cameroon.Fulani	-2.57161	X	15564640	rs1514282
ACE2	ihs	Cameroon.Fulani	-2.51253	X	15564663	rs1514281
ACE2	ihs	Cameroon.Fulani	-2.09936	X	15599443	rs4646122
ACE2	ihs	Cameroon.Fulani	-2.47991	X	15664416	rs113351343
ACE2	ihs	Cameroon.Fulani	-2.47991	X	15665613	rs56821287
ACE2	ihs	Cameroon.Fulani	-2.52711	X	15718102	rs113770253
ACE2	ihs	Cameroon.Fulani	-2.51417	X	15719928	rs142918994
ACE2	ihs	Cameroon.Fulani	-2.51417	X	15719989	rs147236895
ACE2	ihs	Tanzania.Sandawe	2.36142	X	15621438	rs1548474
ACE2	ihs	Tanzania.Sandawe	2.80364	X	15642742	rs5935998
ACE2	ihs	Tanzania.Sandawe	2.55459	X	15646263	rs5934255
ACE2	ihs	Tanzania.Sandawe	2.08928	X	15650529	.
ACE2	ihs	Tanzania.Sandawe	2.17279	X	15656771	.
ACE2	ihs	Tanzania.Sandawe	2.02519	X	15668284	rs181733726
ACE2	ihs	Tanzania.Sandawe	2.13031	X	15674264	rs374581740
ACE2	ihs	Tanzania.Sandawe	2.92113	X	15682995	rs4830984
ACE2	ihs	Tanzania.Sandawe	2.42013	X	15684692	.
ACE2	ihs	Tanzania.Sandawe	3.23224	X	15688395	rs4830986
ACE2	ihs	Tanzania.Sandawe	3.12166	X	15705586	rs2090196
ACE2	ihs	Tanzania.Sandawe	2.31875	X	15708323	rs5936022
ACE2	ihs	Tanzania.Sandawe	2.40002	X	15718122	rs1849863
ACE2	ihs	Tanzania.Sandawe	2.0017	X	15725485	rs4830988
ACE2	ihs	Ethiopia.Sabue	2.03528	X	15695950	rs5936013
ACE2	ihs	Ethiopia.Sabue	2.38217	X	15700755	rs5936018
ACE2	ihs	Ethiopia.Sabue	2.38219	X	15705022	rs5936019
