# Supplementary material for: Impact of natural selection on global patterns of genetic variation, and association with clinical phenotypes, at genes involved in SARS-CoV-2 infection
Source: Res Sq. 2021 Jul 27:rs.3.rs-673011. Preprint. [Version 1] doi: 10.21203/rs.3.rs-673011/v1 (PMC8328070; doi:10.21203/rs.3.rs-673011/v1)
Supplement: Supplement 9 [file 1b9f2e96576dda9004263493.xlsx]

## Sheet: MONDO Disease Class
MONDO CODE	Phenotype Name	Gene	Num_Cases	Num_Controls	Num_Loci	SKAT P-Value	Burden P-Value	Burden_OR	Burden_SE	L_CI	U_CI	Ancestry
MONDO:0001548_hepatic_coma	Hepatic Coma	ACE2	16	6817	42	4.28021e-31	0.00189616	10.4548	0.755392	2.37855	45.9535	EA
MONDO:0001711_hepatic_encephalopathy	Hepatic Encephalopathy	ACE2	97	8045	41	1.09078e-12	0.00425685	5.73403	0.610798	1.73196	18.9837	AA
MONDO:0001577_respiratory_syncytial_virus_infectious_disease	Respiratory Syncytial Virus Infectious Disease	ACE2	40	5859	41	2.29426e-07	0.165034	3.60966	0.924428	0.589627	22.0981	EA
MONDO:0001577_respiratory_syncytial_virus_infectious_disease	Respiratory Syncytial Virus Infectious Disease	CD26	56	6392	41	6.77295e-07	0.122148	6.05948	1.16537	0.617238	59.4865	AA
MONDO:0021113_respiratory_failure	Respiratory Failure	TMPRSS2	199	6392	15	2.25373e-06	0.0124362	7.30891	0.795407	1.53741	34.747	AA
MONDO:0021113_respiratory_failure	Respiratory Failure	ACE2	199	6392	42	8.9755e-05	0.0508566	3.0968	0.578823	0.995885	9.6298	AA
MONDO:0005155_cirrhosis_of_liver	Cirrhosis Of Liver	ACE2	10	6817	42	0.000181514	0.0837043	9.40148	1.29537	0.742258	119.08	EA
MONDO:0004867_upper_respiratory_tract_disease	Upper Respiratory Tract Disease	CD26	144	6392	41	0.000254217	0.0977596	4.15546	0.860115	0.769971	22.4266	AA
MONDO:0001577_respiratory_syncytial_virus_infectious_disease	Respiratory Syncytial Virus Infectious Disease	TMPRSS2	56	6392	15	0.000392054	0.0216637	11.6342	1.06844	1.43305	94.452	AA
MONDO:0005249_pneumonia	Pneumonia	LY6E	1120	6392	8	0.00996621	0.0107959	6.08616	0.708223	1.51877	24.3891	AA
MONDO:0001577_respiratory_syncytial_virus_infectious_disease	Respiratory Syncytial Virus Infectious Disease	ACE2	56	6392	41	0.0134809	0.185688	3.84533	1.01747	0.523414	28.2502	AA
MONDO:0004781_acute_myocardial_infarction	Acute Myocardial Infarction	LY6E	396	6494	8	0.0177164	0.293638	3.64549	1.23164	0.326109	40.752	EA
MONDO:0005249_pneumonia	Pneumonia	TMPRSS2	741	5859	15	0.0207162	0.151735	7.61112	1.41575	0.474611	122.056	EA
MONDO:0021113_respiratory_failure	Respiratory Failure	ACE2	173	5859	42	0.0252261	0.356428	1.85853	0.671433	0.498465	6.92955	EA
MONDO:0000270_lower_respiratory_tract_disease	Lower Respiratory Tract Disease	TMPRSS2	693	6392	15	0.0342696	0.154125	2.59182	0.668244	0.699494	9.60341	AA
MONDO:0000270_lower_respiratory_tract_disease	Lower Respiratory Tract Disease	CD26	175	5859	41	0.0362072	0.672279	1.62305	1.14515	0.172013	15.3145	EA
MONDO:0005249_pneumonia	Pneumonia	TMPRSS2	1120	6392	15	0.0477611	0.202946	2.2345	0.631297	0.64835	7.70107	AA
MONDO:0002492_acute_kidney_failure	Acute Kidney Failure	CD26	1255	5513	41	0.0620418	0.0312828	2.56265	0.43698	1.08824	6.03468	EA
MONDO:0004867_upper_respiratory_tract_disease	Upper Respiratory Tract Disease	ACE2	109	5859	41	0.105947	0.482754	1.79205	0.831043	0.351522	9.13583	EA
MONDO:0005249_pneumonia	Pneumonia	CD26	741	5859	41	0.172549	0.571722	1.40728	0.603167	0.431474	4.58994	EA
MONDO:0001106_kidney_failure	Kidney Failure	TMPRSS2	585	6080	15	0.293946	0.719063	1.371	0.877165	0.245686	7.6506	AA
MONDO:0001106_kidney_failure	Kidney Failure	CD26	322	5513	41	0.321095	0.73892	1.40444	1.01902	0.190588	10.3493	EA
MONDO:0004781_acute_myocardial_infarction	Acute Myocardial Infarction	ACE2	396	6494	41	0.365308	0.734301	1.23147	0.613629	0.369907	4.09973	EA
MONDO:0002492_acute_kidney_failure	Acute Kidney Failure	ACE2	1255	5513	41	0.373334	0.918928	0.958364	0.41918	0.421422	2.17943	EA
MONDO:0005249_pneumonia	Pneumonia	CD26	1120	6392	41	0.374799	0.744714	0.815687	0.626687	0.238823	2.78593	AA
MONDO:0002492_acute_kidney_failure	Acute Kidney Failure	CD26	1905	6080	41	0.388103	0.433909	0.643313	0.56341	0.213225	1.94092	AA
MONDO:0002492_acute_kidney_failure	Acute Kidney Failure	LY6E	1255	5513	8	0.451916	0.669148	1.56047	1.04131	0.20271	12.0126	EA
MONDO:0005155_cirrhosis_of_liver	Cirrhosis Of Liver	ACE2	20	8045	42	0.515964	0.774816	2.11872	2.62558	0.0123349	363.925	AA
MONDO:0000270_lower_respiratory_tract_disease	Lower Respiratory Tract Disease	LY6E	693	6392	8	0.518452	0.841651	1.30068	1.31583	0.0986537	17.1486	AA
MONDO:0002492_acute_kidney_failure	Acute Kidney Failure	ACE2	1905	6080	41	0.519576	0.139797	0.512325	0.452961	0.210852	1.24484	AA
MONDO:0005249_pneumonia	Pneumonia	ACE2	1120	6392	41	0.536529	0.925896	0.958275	0.459324	0.389498	2.35762	AA
MONDO:0001106_kidney_failure	Kidney Failure	CD26	585	6080	41	0.589726	0.561925	0.540994	1.05922	0.0678526	4.31339	AA
MONDO:0001106_kidney_failure	Kidney Failure	ACE2	585	6080	41	0.602165	0.854899	1.10323	0.536987	0.3851	3.16052	AA
MONDO:0002492_acute_kidney_failure	Acute Kidney Failure	TMPRSS2	1905	6080	15	0.721538	0.26865	0.373612	0.889853	0.0653074	2.13737	AA
MONDO:0001106_kidney_failure	Kidney Failure	LY6E	585	6080	8	0.759523	0.951177	0.918364	1.39138	0.0600687	14.0405	AA
MONDO:0002492_acute_kidney_failure	Acute Kidney Failure	TMPRSS2	1255	5513	15	0.774624	0.999984	1.49228e-15	1751140	0	#NUM!	EA
MONDO:0005249_pneumonia	Pneumonia	LY6E	741	5859	8	0.828017	0.999964	6.27639e-23	1141210	0	#NUM!	EA
MONDO:0000270_lower_respiratory_tract_disease	Lower Respiratory Tract Disease	CD26	693	6392	41	0.832043	0.613602	0.65248	0.84557	0.124395	3.4224	AA
MONDO:0021113_respiratory_failure	Respiratory Failure	TMPRSS2	173	5859	15	0.861189	0.99999	2.49836e-12	2194470	0	#NUM!	EA
MONDO:0004781_acute_myocardial_infarction	Acute Myocardial Infarction	CD26	342	7824	41	0.871849	0.725146	0.642073	1.26023	0.0543069	7.59126	AA
MONDO:0000270_lower_respiratory_tract_disease	Lower Respiratory Tract Disease	TMPRSS2	175	5859	15	0.874304	0.99999	3.0525e-12	2194460	0	#NUM!	EA
MONDO:0004867_upper_respiratory_tract_disease	Upper Respiratory Tract Disease	TMPRSS2	109	5859	15	0.890352	0.99999	4.01948e-12	2194460	0	#NUM!	EA
MONDO:0001106_kidney_failure	Kidney Failure	LY6E	322	5513	8	0.900562	0.99997	7.05991e-21	1227590	0	#NUM!	EA
MONDO:0001106_kidney_failure	Kidney Failure	TMPRSS2	322	5513	15	0.926837	0.999985	7.66419e-15	1750150	0	#NUM!	EA
MONDO:0002815_acute_myocarditis	Acute Myocarditis	CD26	18	7824	41	0.936336	0.654381	3.39939	2.7324	0.0160522	719.891	AA
MONDO:0004781_acute_myocardial_infarction	Acute Myocardial Infarction	TMPRSS2	396	6494	15	0.937776	0.999985	7.26319e-15	1751690	0	#NUM!	EA
MONDO:0001577_respiratory_syncytial_virus_infectious_disease	Respiratory Syncytial Virus Infectious Disease	TMPRSS2	40	5859	15	0.940328	0.999991	1.36326e-11	2194460	0	#NUM!	EA
MONDO:0002492_acute_kidney_failure	Acute Kidney Failure	LY6E	1905	6080	8	0.96224	0.556595	0.542906	1.03897	0.0708493	4.1602	AA
MONDO:0000270_lower_respiratory_tract_disease	Lower Respiratory Tract Disease	LY6E	175	5859	8	0.972851	0.999966	6.52242e-22	1137850	0	#NUM!	EA
MONDO:0005155_cirrhosis_of_liver	Cirrhosis Of Liver	CD26	20	8045	41	0.974808	0.697704	3.09579	2.9104	0.0103131	929.296	AA
MONDO:0000270_lower_respiratory_tract_disease	Lower Respiratory Tract Disease	ACE2	175	5859	42	0.978039	0.845439	0.799739	1.1463	0.0845664	7.56308	EA
MONDO:0021113_respiratory_failure	Respiratory Failure	LY6E	173	5859	8	0.985391	0.999966	9.04545e-22	1145010	0	#NUM!	EA
MONDO:0005249_pneumonia	Pneumonia	ACE2	741	5859	41	0.989944	0.370718	0.536393	0.695911	0.137123	2.09824	EA
MONDO:0001711_hepatic_encephalopathy	Hepatic Encephalopathy	TMPRSS2	55	6817	15	0.990288	0.999986	6.5911e-14	1751130	0	#NUM!	EA
MONDO:0004781_acute_myocardial_infarction	Acute Myocardial Infarction	LY6E	342	7824	8	0.990673	0.999963	1.06556e-18	881976	0	#NUM!	AA
MONDO:0021113_respiratory_failure	Respiratory Failure	LY6E	199	6392	8	0.993648	0.999974	6.18921e-15	1003510	0	#NUM!	AA
MONDO:0001106_kidney_failure	Kidney Failure	ACE2	322	5513	41	0.994684	0.354088	0.209767	1.68516	0.00771436	5.70393	EA
MONDO:0004867_upper_respiratory_tract_disease	Upper Respiratory Tract Disease	LY6E	109	5859	8	0.996146	0.999967	3.25128e-21	1139680	0	#NUM!	EA
MONDO:0004867_upper_respiratory_tract_disease	Upper Respiratory Tract Disease	LY6E	144	6392	8	0.99624	0.999974	8.07105e-15	1001270	0	#NUM!	AA
MONDO:0001548_hepatic_coma	Hepatic Coma	TMPRSS2	16	6817	15	0.996964	0.999987	3.98624e-13	1749280	0	#NUM!	EA
MONDO:0001711_hepatic_encephalopathy	Hepatic Encephalopathy	LY6E	55	6817	8	0.999047	0.999968	1.23619e-20	1138100	0	#NUM!	EA
MONDO:0002815_acute_myocarditis	Acute Myocarditis	TMPRSS2	8	6494	15	0.999259	0.999988	1.55543e-12	1752330	0	#NUM!	EA
MONDO:0000270_lower_respiratory_tract_disease	Lower Respiratory Tract Disease	ACE2	693	6392	42	0.999388	0.653955	0.744867	0.657102	0.205467	2.70032	AA
MONDO:0001577_respiratory_syncytial_virus_infectious_disease	Respiratory Syncytial Virus Infectious Disease	LY6E	56	6392	8	0.999393	0.999975	2.46653e-14	1008540	0	#NUM!	AA
MONDO:0001711_hepatic_encephalopathy	Hepatic Encephalopathy	LY6E	97	8045	8	0.999409	0.999965	5.28847e-18	911624	0	#NUM!	AA
MONDO:0001577_respiratory_syncytial_virus_infectious_disease	Respiratory Syncytial Virus Infectious Disease	LY6E	40	5859	8	0.999537	0.999968	3.39361e-20	1123190	0	#NUM!	EA
MONDO:0002815_acute_myocarditis	Acute Myocarditis	LY6E	8	6494	8	0.999604	0.999972	4.41545e-19	1222610	0	#NUM!	EA
MONDO:0004867_upper_respiratory_tract_disease	Upper Respiratory Tract Disease	ACE2	144	6392	41	0.99962	0.573041	0.424161	1.52173	0.0214886	8.37247	AA
MONDO:0005155_cirrhosis_of_liver	Cirrhosis Of Liver	TMPRSS2	10	6817	15	0.999694	0.999988	3.75699e-12	1744570	0	#NUM!	EA
MONDO:0005155_cirrhosis_of_liver	Cirrhosis Of Liver	LY6E	10	6817	8	0.999945	0.99997	2.63732e-18	1059300	0	#NUM!	EA
MONDO:0005155_cirrhosis_of_liver	Cirrhosis Of Liver	LY6E	20	8045	8	0.999976	0.999967	5.81551e-17	906290	0	#NUM!	AA
MONDO:0004781_acute_myocardial_infarction	Acute Myocardial Infarction	TMPRSS2	342	7824	15	0.999981	0.99995	8.92592e-18	624239	0	#NUM!	AA
MONDO:0001548_hepatic_coma	Hepatic Coma	LY6E	16	6817	8	0.999981	0.999969	3.18168e-18	1049270	0	#NUM!	EA
MONDO:0004781_acute_myocardial_infarction	Acute Myocardial Infarction	ACE2	342	7824	41	0.999985	0.276941	0.256516	1.25138	0.0220759	2.98065	AA
MONDO:0001548_hepatic_coma	Hepatic Coma	LY6E	22	8045	8	0.99999	0.999967	8.12331e-17	902873	0	#NUM!	AA
MONDO:0002815_acute_myocarditis	Acute Myocarditis	LY6E	18	7824	8	0.999991	0.999967	1.02215e-16	885578	0	#NUM!	AA
MONDO:0004781_acute_myocardial_infarction	Acute Myocardial Infarction	CD26	396	6494	41	0.999991	0.999863	0	697543	#NUM!	#NUM!	EA
MONDO:0001548_hepatic_coma	Hepatic Coma	ACE2	22	8045	42	0.999996	0.999654	0	605965	#NUM!	#NUM!	AA
MONDO:0004867_upper_respiratory_tract_disease	Upper Respiratory Tract Disease	TMPRSS2	144	6392	15	0.999999	0.999966	1.18775e-13	702508	0	#NUM!	AA
MONDO:0002815_acute_myocarditis	Acute Myocarditis	ACE2	18	7824	42	1	0.999653	0	597788	#NUM!	#NUM!	AA
MONDO:0001548_hepatic_coma	Hepatic Coma	CD26	22	8045	41	1	0.999846	0	680493	#NUM!	#NUM!	AA
MONDO:0001711_hepatic_encephalopathy	Hepatic Encephalopathy	CD26	97	8045	41	1	0.999837	0	692582	#NUM!	#NUM!	AA
MONDO:0021113_respiratory_failure	Respiratory Failure	CD26	199	6392	41	1	0.466245	0.142244	2.67648	0.000749494	26.996	AA
MONDO:0001548_hepatic_coma	Hepatic Coma	TMPRSS2	22	8045	15	1	0.999954	4.24421e-16	614885	0	#NUM!	AA
MONDO:0001711_hepatic_encephalopathy	Hepatic Encephalopathy	TMPRSS2	97	8045	15	1	0.999953	5.25135e-17	635690	0	#NUM!	AA
MONDO:0002815_acute_myocarditis	Acute Myocarditis	TMPRSS2	18	7824	15	1	0.999955	3.57954e-16	627612	0	#NUM!	AA
MONDO:0005155_cirrhosis_of_liver	Cirrhosis Of Liver	TMPRSS2	20	8045	15	1	0.999955	3.1221e-16	636194	0	#NUM!	AA
MONDO:0001711_hepatic_encephalopathy	Hepatic Encephalopathy	ACE2	55	6817	41	1	0.999783	0	664348	#NUM!	#NUM!	EA
MONDO:0002815_acute_myocarditis	Acute Myocarditis	ACE2	8	6494	42	1	0.999668	0	677527	#NUM!	#NUM!	EA
MONDO:0001548_hepatic_coma	Hepatic Coma	CD26	16	6817	41	1	0.999867	0	660596	#NUM!	#NUM!	EA
MONDO:0001577_respiratory_syncytial_virus_infectious_disease	Respiratory Syncytial Virus Infectious Disease	CD26	40	5859	41	1	0.999916	9.33267e-35	744574	0	#NUM!	EA
MONDO:0001711_hepatic_encephalopathy	Hepatic Encephalopathy	CD26	55	6817	41	1	0.999879	0	697016	#NUM!	#NUM!	EA
MONDO:0002815_acute_myocarditis	Acute Myocarditis	CD26	8	6494	41	1	0.999883	1.26117e-44	688506	0	#NUM!	EA
MONDO:0004867_upper_respiratory_tract_disease	Upper Respiratory Tract Disease	CD26	109	5859	41	1	0.999885	0	754362	#NUM!	#NUM!	EA
MONDO:0005155_cirrhosis_of_liver	Cirrhosis Of Liver	CD26	10	6817	41	1	0.999896	3.07744e-38	661696	0	#NUM!	EA
MONDO:0021113_respiratory_failure	Respiratory Failure	CD26	173	5859	41	1	0.999872	0	754805	#NUM!	#NUM!	EA

## Sheet: Phecode PheWAS
Phecode	Gene	Phenotype Description	Sample Size	Cases	Beta	SE	P	Ancestry
317.1	LY6E	Alcoholism	5303	102	4.20996	0.981425	1.78964e-05	EA
317	LY6E	Alcohol-related disorders	5317	116	4.14976	0.979266	2.25892e-05	EA
705.8	TMPRSS2	Hyperhidrosis	6744	136	2.73706	0.666471	4.01172e-05	AA
304	TMPRSS2	Adjustment reaction	3514	199	3.20956	0.799188	5.91876e-05	AA
420.1	ACE2	Myocarditis Both circulatory system	6805	11	3.29039	0.823712	6.48077e-05	AA
441.1	ACE2	Acute vascular insufficiency of intestine Both circulatory system	6661	10	3.41901	0.882293	0.000106561	AA
599.3	LY6E	Dysuria	5578	83	3.4384	0.897371	0.000127293	EA
980	LY6E	Encounter for long-term (current) use of antibiotics	6838	28	4.40204	1.17467	0.000178625	EA
288	ACE2	Diseases of white blood cells Both hematopoietic	6462	113	1.93581	0.522316	0.00021038	AA
381.2	TMPRSS2	Eustachian tube disorders	7254	59	2.85107	0.773592	0.000228255	AA
706	TMPRSS2	Diseases of sebaceous glands	6895	287	2.10811	0.591979	0.000369274	AA
395.4	LY6E	Nonrheumatic pulmonary valve disorders	3992	22	4.47794	1.27042	0.000423855	EA
441	ACE2	Vascular insufficiency of intestine circulatory system	6677	26	2.71303	0.772768	0.000446765	AA
870.3	LY6E	Other open wound of head and face	6517	20	4.14452	1.1831	0.000459865	EA
476	TMPRSS2	Allergic rhinitis	6124	1285	1.8356	0.532383	0.000564983	AA
470	TMPRSS2	Septal Deviations/Turbinate Hypertrophy	4945	106	2.81358	0.827814	0.000676805	AA
218	TMPRSS2	Benign neoplasm of uterus	7319	339	1.91105	0.564311	0.000707869	AA
597	LY6E	Other disorders of urethra and urinary tract	6495	29	3.89325	1.15708	0.000766227	EA
597.1	LY6E	Urethral stricture (not specified as infectious)	6489	23	4.13106	1.23067	0.000788626	EA
980	ACE2	Encounter for long-term (current) use of antibiotics Both infectious diseases	8100	46	2.16829	0.647354	0.000809681	AA
378	TMPRSS2	Strabismus and other disorders of binocular eye movements	6419	24	3.75825	1.12671	0.000851195	EA
626.14	ACE2	Irregular menstrual bleeding Female genitourinary	6401	3	10.2908	3.19545	0.00127987	EA
250.25	LY6E	Diabetes type 2 with peripheral circulatory disorders	4331	33	3.83034	1.19539	0.00135415	EA
378.1	TMPRSS2	Strabismus (not specified as paralytic)	6420	25	3.67299	1.14907	0.00139113	EA
625	ACE2	Pain and other symptoms associated with female genital organs Female genitourinary	6721	57	5.56849	1.74336	0.00140262	EA
592.11	ACE2	Acute cystitis Both genitourinary	5600	10	7.12684	2.24057	0.00146862	EA
618	TMPRSS2	Genital prolapse	8084	94	2.48387	0.793758	0.00175253	AA
722.1	ACE2	Displacement of intervertebral disc Both musculoskeletal	5982	111	3.0539	0.976324	0.00176026	EA
440.1	ACE2	Atherosclerosis of renal artery Both circulatory system	6667	16	2.92562	0.943121	0.0019218	AA
327.71	ACE2	Restless legs syndrome Both nEAological	4920	82	2.92381	0.948123	0.0020438	EA
743	TMPRSS2	Osteoporosis, osteopenia and pathological fracture	6502	446	2.21601	0.720589	0.00210311	EA
473.4	TMPRSS2	Voice disturbance	5025	186	2.55631	0.840215	0.00234662	AA
430	LY6E	Intracranial hemorrhage	5359	45	3.4224	1.12856	0.00242514	EA
70.4	ACE2	Chronic hepatitis Both infectious diseases	5911	11	4.91473	1.62155	0.00243833	EA
618.2	TMPRSS2	Uterine/Uterovaginal prolapse	6823	28	4.7596	1.57446	0.00250283	EA
465.2	TMPRSS2	Acute pharyngitis	5654	249	2.12567	0.70793	0.00267642	AA
279.11	TMPRSS2	Deficiency of humoral immunity	6417	23	3.35715	1.12452	0.00283207	EA
275.3	TMPRSS2	Disorders of magnesium metabolism	6100	150	2.43636	0.818569	0.00291694	EA
369	TMPRSS2	Infection of the eye	6847	104	2.29187	0.771374	0.00296683	AA
772.6	ACE2	Facial weakness Both symptoms	6965	25	2.57746	0.871064	0.00308663	AA
800.1	TMPRSS2	Fracture of neck of femur	7257	23	3.15373	1.07324	0.00329791	AA
613	TMPRSS2	Other nonmalignant breast conditions	7600	167	1.94821	0.665464	0.00341587	AA
443.8	ACE2	Other specified peripheral vascular diseases Both circulatory system	6660	9	2.9898	1.02242	0.00345283	AA
772.1	ACE2	Muscular wasting and disuse atrophy Both symptoms	6986	46	2.20632	0.760026	0.00369662	AA
613.5	TMPRSS2	Mastodynia	7618	185	1.90212	0.658006	0.00384351	AA
429.9	LY6E	Cardiac complications, not elsewhere classified	3282	40	3.48491	1.2267	0.00449903	EA
41.2	LY6E	Streptococcus infection	5858	42	3.19312	1.12692	0.0046042	EA
250.4	LY6E	Abnormal glucose	4623	325	2.34204	0.828536	0.00470267	EA
785	TMPRSS2	Abdominal pain	6999	2775	1.4988	0.535933	0.00516398	AA
705.8	LY6E	Hyperhidrosis	6399	55	3.13744	1.12554	0.00531173	EA
596.1	TMPRSS2	Bladder neck obstruction	7436	25	3.27958	1.17982	0.00544038	AA
357	ACE2	Inflammatory and toxic nEAopathy nEAological	6557	83	2.68002	0.96724	0.00559204	EA
599.1	TMPRSS2	Urinary obstruction	5090	22	3.10529	1.12423	0.0057424	AA
220	TMPRSS2	Benign neoplasm of ovary	6092	25	3.13686	1.14183	0.00601011	AA
279.7	LY6E	Other immunological findings	6463	69	3.0828	1.12291	0.00604412	EA
740.1	TMPRSS2	Osteoarthritis; localized	6067	551	1.60161	0.583584	0.00606137	AA
743.9	TMPRSS2	Osteopenia or other disorder of bone and cartilage	6300	244	2.35254	0.85933	0.00618804	EA
741.4	LY6E	Joint effusions	6524	42	3.08765	1.13012	0.00629227	EA
333.1	TMPRSS2	Essential tremor	6687	26	2.96245	1.09324	0.0067324	AA
257	LY6E	Testicular dysfunction	6355	45	3.19096	1.17914	0.00680623	EA
201	ACE2	Hodgkin's disease neoplasms	7891	31	2.3182	0.857028	0.00683187	AA
218.1	TMPRSS2	Uterine leiomyoma	7488	508	1.52214	0.562972	0.00685615	AA
726.3	LY6E	Bursitis	5869	42	3.07087	1.14431	0.0072836	EA
797	ACE2	Shock symptoms	7909	64	1.79449	0.668987	0.00730968	AA
580.14	ACE2	Chronic glomerulonephritis, NOS Both genitourinary	4919	27	2.28413	0.852768	0.00739556	AA
574.2	TMPRSS2	Calculus of bile duct	7565	31	2.83053	1.05949	0.00754911	AA
38.3	TMPRSS2	Bacteremia	6594	127	2.04688	0.767279	0.00763708	AA
726.4	TMPRSS2	Calcaneal spur; Exostosis NOS	5408	28	2.87435	1.08187	0.00788743	AA
627.1	LY6E	Postmenopausal bleeding	6440	42	3.33355	1.2549	0.00789735	EA
286.9	LY6E	Abnormal coagulation profile	3829	58	3.13838	1.18212	0.00793353	EA
728.7	TMPRSS2	Fasciitis	5513	133	2.09102	0.790637	0.00817566	AA
618.1	TMPRSS2	Prolapse of vaginal walls	6834	39	3.96073	1.50385	0.00844516	EA
193	TMPRSS2	Thyroid cancer	7965	108	2.00067	0.762847	0.00872537	AA
602	ACE2	Other disorders of prostate Male genitourinary	7063	51	1.91434	0.732529	0.00896638	AA
962.1	ACE2	Adrenal cortical steroids causing adverse effects in therapeutic use Both injuries & poisonings	6087	77	1.61805	0.623146	0.00941558	AA
327.1	TMPRSS2	Hypersomnia	5171	148	2.04719	0.792269	0.00976719	AA
257.1	LY6E	Testicular hypofunction	6369	59	3.02668	1.17693	0.0101206	EA
275.6	TMPRSS2	Hypercalcemia	6002	52	2.81433	1.10356	0.010765	EA
496.21	TMPRSS2	Obstructive chronic bronchitis	5197	65	2.80556	1.10032	0.0107793	EA
380.4	TMPRSS2	Impacted cerumen	7630	264	1.62264	0.639427	0.0111601	AA
379.2	TMPRSS2	Disorders of vitreous body	6900	313	1.699	0.670945	0.0113331	AA
381	TMPRSS2	Otitis media and Eustachian tube disorders	7339	144	1.92946	0.765357	0.0117025	AA
571.6	ACE2	Primary biliary cirrhosis Both digestive	6492	8	2.93725	1.18674	0.0133214	AA
649	ACE2	Other conditions or status of the mother complicating pregnancy, childbirth, or the puerperium Female pregnancy complications	7905	729	-2.68316	1.08563	0.0134538	AA
696.4	ACE2	Psoriasis Both dermatologic	6190	51	2.089	0.845778	0.0135145	AA
451.2	TMPRSS2	Phlebitis and thrombophlebitis of lower extremities	4431	34	2.77133	1.12467	0.013735	EA
706.2	TMPRSS2	Sebaceous cyst	6786	178	1.92183	0.780048	0.0137501	AA
447.7	LY6E	Aortic ectasia	4939	118	3.00038	1.22033	0.0139454	EA
189.2	LY6E	Cancer of bladder	6743	67	2.80095	1.1473	0.0146329	EA
348.9	TMPRSS2	Other conditions of brain, NOS	6696	35	2.59126	1.06162	0.0146523	AA
722.6	TMPRSS2	Degeneration of intervertebral disc	6854	476	1.40729	0.577118	0.0147495	AA
452.2	ACE2	Deep vein thrombosis [DVT] Both circulatory system	4630	233	2.37216	0.97554	0.0150307	EA
830	TMPRSS2	Dislocation	7792	140	1.82572	0.752562	0.0152659	AA
270	TMPRSS2	Disorders of protein plasma/amino-acid transport and metabolism	6570	60	2.63411	1.08823	0.0154973	EA
327.41	LY6E	Organic or persistent insomnia	4881	43	2.73943	1.13447	0.0157476	EA
747.1	LY6E	Cardiac congenital anomalies	6551	451	2.07309	0.858892	0.0157924	EA
842	TMPRSS2	Other sprains and strains	6233	29	2.57588	1.06778	0.0158496	AA
306	TMPRSS2	Other mental disorder	4719	1404	1.67608	0.700126	0.0166674	AA
275	TMPRSS2	Disorders of mineral metabolism	6237	287	1.92903	0.805798	0.0166685	EA
292.4	LY6E	Altered mental status	6021	80	2.68021	1.11986	0.0166953	EA
288.2	ACE2	Elevated white blood cell count Both hematopoietic	6542	193	1.3079	0.546683	0.0167372	AA
280.2	LY6E	Iron deficiency anemia secondary to blood loss (chronic)	4366	73	2.81096	1.17789	0.0170123	EA
994.21	TMPRSS2	Septic shock	7362	39	2.5143	1.05415	0.0170726	AA
574.2	ACE2	Calculus of bile duct Both digestive	7565	31	2.1518	0.902583	0.0171232	AA
80	TMPRSS2	Postoperative infection	6564	71	2.56973	1.08161	0.0175093	EA
531	LY6E	Peptic ulcer (excl. esophageal)	6717	92	2.61463	1.10064	0.0175232	EA
479	TMPRSS2	Other upper respiratory disease	5290	451	1.69818	0.715634	0.0176458	AA
962	ACE2	Poisoning by hormones and synthetic substitutes injuries & poisonings	6110	100	1.43997	0.608708	0.0180001	AA
696	ACE2	Psoriasis and related disorders Both dermatologic	6198	59	1.97652	0.836862	0.0181854	AA
594.3	TMPRSS2	Calculus of ureter	7713	44	2.51115	1.06717	0.0186182	AA
706.1	TMPRSS2	Acne	6813	205	1.8543	0.790567	0.0189998	AA
740	TMPRSS2	Osteoarthrosis	6665	1149	1.23857	0.530711	0.019606	AA
271.3	TMPRSS2	Intestinal disaccharidase deficiencies and disaccharide malabsorption	7757	727	1.22628	0.525568	0.019635	AA
618	TMPRSS2	Genital prolapse	6848	53	3.44842	1.47819	0.0196554	EA
962.3	ACE2	Hormones and synthetic substitutes causing adverse effects in therapeutic use Both injuries & poisonings	6079	69	1.48356	0.637529	0.0199628	AA
689	ACE2	Disorder of skin and subcutaneous tissue NOS Both dermatologic	7716	131	1.5379	0.666647	0.0210593	AA
579	TMPRSS2	Other symptoms involving abdomen and pelvis	6691	149	1.75658	0.762863	0.0213001	AA
747	LY6E	Cardiac and circulatory congenital anomalies	6589	489	1.97481	0.858314	0.0214027	EA
296.22	LY6E	Major depressive disorder	4615	334	2.15701	0.940001	0.0217507	EA
261	ACE2	Vitamin deficiency Both endocrine/metabolic	6249	777	-1.99397	0.872778	0.0223349	AA
858	TMPRSS2	Complication of internal orthopedic device	5326	53	2.47599	1.08558	0.0225608	EA
500	TMPRSS2	Lung disease due to external agents	5140	45	2.47659	1.08639	0.0226292	EA
261.4	ACE2	Vitamin D deficiency Both endocrine/metabolic	6714	1242	-1.43082	0.631271	0.0234166	AA
477	TMPRSS2	Epistaxis or throat hemorrhage	5577	79	2.48443	1.09763	0.0236084	EA
626.12	ACE2	Excessive or frequent menstruation Female genitourinary	6419	21	4.93246	2.17957	0.0236329	EA
433.11	ACE2	Occlusion of cerebral arteries, with cerebral infarction Both circulatory system	6867	51	1.7613	0.782519	0.0243977	AA
451	TMPRSS2	Phlebitis and thrombophlebitis	4449	52	2.48394	1.10519	0.0246066	EA
427.41	TMPRSS2	Ventricular fibrillation and flutter	4204	42	2.45985	1.09798	0.0250689	AA
696.41	ACE2	Psoriasis vulgaris Both dermatologic	6203	64	1.83597	0.823081	0.0257073	AA
78	TMPRSS2	Viral warts & HPV	5966	66	2.45244	1.09982	0.0257577	EA
590	ACE2	Pyelonephritis genitourinary	5616	26	3.74333	1.68432	0.0262526	EA
371	TMPRSS2	Inflammation of the eye	6937	194	1.72098	0.774573	0.0262942	AA
447.1	ACE2	Stricture of artery Both circulatory system	6669	18	2.52109	1.13724	0.0266333	AA
378.5	ACE2	Paralytic strabismus Both sense organs	6601	14	2.71708	1.2296	0.0271246	AA
426.91	ACE2	Cardiac pacemaker in situ Both circulatory system	4361	199	1.23649	0.559706	0.0271621	AA
530.1	TMPRSS2	Esophagitis, GERD and related diseases	6154	1644	1.22438	0.555913	0.0276327	AA
288.3	ACE2	Eosinophilia Both hematopoietic	5826	11	4.03472	1.83298	0.0277235	EA
136	TMPRSS2	Other infectious and parasitic diseases	7465	173	1.66723	0.757532	0.0277448	AA
578.2	LY6E	Blood in stool	6246	87	2.44221	1.11138	0.0279877	EA
250.2	TMPRSS2	Type 2 diabetes	6731	2498	-2.30207	1.04771	0.0280042	AA
395.3	ACE2	Nonrheumatic tricuspid valve disorders Both circulatory system	6666	47	1.98663	0.905298	0.0282028	AA
628	ACE2	Ovarian cyst Female genitourinary	6445	47	4.2115	1.9219	0.0284281	EA
272.12	ACE2	Hyperglyceridemia Both endocrine/metabolic	4156	101	1.41283	0.645979	0.0287339	AA
705.8	TMPRSS2	Hyperhidrosis	6399	55	2.36555	1.08378	0.0290599	EA
530.14	TMPRSS2	Reflux esophagitis	4718	208	1.83564	0.841277	0.0291116	AA
250.42	LY6E	Other abnormal glucose	4619	321	2.00557	0.919819	0.029228	EA
371.3	TMPRSS2	Inflammation of eyelids	6938	195	1.6877	0.774119	0.0292463	AA
427.42	LY6E	Cardiac arrest	2017	89	2.72634	1.2506	0.0292559	EA
444.1	ACE2	Arterial embolism and thrombosis of lower extremity artery Both circulatory system	6726	75	1.64595	0.756448	0.0295631	AA
535.2	TMPRSS2	Atrophic gastritis	6715	61	2.32531	1.06954	0.0296968	AA
286.8	ACE2	Hypercoagulable state Both hematopoietic	6363	50	1.99381	0.918246	0.029907	AA
530	TMPRSS2	Diseases of esophagus	6189	1679	1.20722	0.556023	0.0299181	AA
586.12	ACE2	Vesicoureteral reflux Both genitourinary	4522	2	19.19	8.84967	0.0301253	EA
696.4	LY6E	Psoriasis	5962	90	2.40998	1.11314	0.0303856	EA
560.1	TMPRSS2	Paralytic ileus	5626	37	2.38153	1.101	0.0305365	AA
285.1	LY6E	Acute posthemorrhagic anemia	4398	105	2.52503	1.1707	0.0310163	EA
292.3	LY6E	Memory loss	6057	116	2.39966	1.11594	0.0315269	EA
695.4	ACE2	Lupus (localized and systemic) dermatologic	6455	162	1.52349	0.708495	0.0315306	AA
705	TMPRSS2	Disorders of sweat glands	6665	57	2.2902	1.06888	0.032144	AA
153.2	TMPRSS2	Colon cancer	5961	66	2.35314	1.0995	0.0323396	EA
797.1	ACE2	Cardiogenic shock Both symptoms	7918	73	1.49766	0.699939	0.0323783	AA
695.42	ACE2	Systemic lupus erythematosus Both dermatologic	6474	181	1.46892	0.687379	0.0325986	AA
696	LY6E	Psoriasis and related disorders	5964	92	2.37623	1.11267	0.0327114	EA
596	LY6E	Other disorders of bladder	6558	92	2.40502	1.12616	0.0327117	EA
705.3	TMPRSS2	Hidradenitis	6676	68	2.29007	1.07252	0.0327429	AA
841	ACE2	Sprains and strains of back and neck Both injuries & poisonings	6386	182	1.21593	0.570637	0.0331037	AA
756.1	ACE2	Congenital anomalies of abdominal wall; diaphram Both congenital anomalies	6790	4	5.24095	2.46394	0.0334147	EA
857	TMPRSS2	Mechanical complication of unspecified genitourinary device, implant, and graft	6707	53	2.22152	1.05043	0.0344422	AA
979	LY6E	Adverse drug events and drug allergies	5274	107	2.3961	1.14129	0.0357749	EA
465	TMPRSS2	Acute upper respiratory infections of multiple or unspecified sites	6605	1200	1.15588	0.552368	0.0363862	AA
550.6	LY6E	Incisional hernia	6161	96	2.29113	1.09659	0.0366796	EA
871	TMPRSS2	Open wounds of extremities	6550	53	2.2429	1.07362	0.036698	EA
586.2	ACE2	Cyst of kidney, acquired Both genitourinary	4561	41	2.7112	1.29837	0.036784	EA
696.41	LY6E	Psoriasis vulgaris	5962	90	2.31074	1.11364	0.037991	EA
618.1	TMPRSS2	Prolapse of vaginal walls	8041	51	2.23902	1.08293	0.0386817	AA
379	TMPRSS2	Other disorders of eye	6470	75	2.21549	1.07733	0.0397381	EA
447.7	ACE2	Aortic ectasia Both circulatory system	4939	118	1.94563	0.946186	0.0397552	EA
426.31	LY6E	Right bundle branch block	2107	179	2.54751	1.2448	0.0407048	EA
681.7	ACE2	Cellulitis and abscess of trunk Both dermatologic	6553	177	-10.0663	4.95006	0.0419945	AA
579.8	ACE2	Nonspecific abnormal findings in stool contents Both digestive	6595	53	1.73514	0.853565	0.0420711	AA
372	TMPRSS2	Disorders of conjunctiva	6813	70	2.138	1.06116	0.0439277	AA
729	TMPRSS2	Other disorders of soft tissues	5898	71	2.17373	1.07996	0.0441375	EA
278.11	ACE2	Morbid obesity Both endocrine/metabolic	5604	1783	0.654406	0.326027	0.0447268	AA
706.8	TMPRSS2	Other specified diseases of sebaceous glands	6697	89	2.13273	1.06789	0.0458093	AA
979	TMPRSS2	Adverse drug events and drug allergies	6203	193	1.52465	0.766667	0.0467372	AA
562	ACE2	Diverticulosis and diverticulitis digestive	5808	219	-5.41091	2.731	0.0475585	AA
714	TMPRSS2	Rheumatoid arthritis and other inflammatory polyarthropathies	7112	188	1.53432	0.776094	0.0480444	AA
250	TMPRSS2	Diabetes mellitus	6212	1979	-2.07161	1.05001	0.0485016	AA
427.42	ACE2	Cardiac arrest Both circulatory system	4241	79	1.29156	0.656183	0.049034	AA
427.22	ACE2	Atrial flutter Both circulatory system	3003	1075	-1.64048	0.835747	0.0496592	EA
288.2	TMPRSS2	Elevated white blood cell count	5913	98	2.10445	1.07911	0.0511562	EA
714.1	TMPRSS2	Rheumatoid arthritis	7125	201	1.5075	0.774761	0.0516835	AA
340	LY6E	Migraine	6587	168	2.21406	1.1383	0.0517676	EA
593.1	ACE2	Gross hematuria Both genitourinary	5497	133	1.24662	0.642585	0.0523789	AA
594.1	LY6E	Calculus of kidney	6613	179	2.18364	1.12593	0.0524514	EA
562.1	ACE2	Diverticulosis Both digestive	5947	358	-2.69714	1.39099	0.0525001	AA
585.4	LY6E	Chronic kidney disease, Stage I or II	4611	91	2.21727	1.14392	0.0525854	EA
395.3	TMPRSS2	Nonrheumatic tricuspid valve disorders	6666	47	2.0276	1.04716	0.0528329	AA
451.2	TMPRSS2	Phlebitis and thrombophlebitis of lower extremities	5217	51	2.09428	1.08423	0.0534118	AA
286.12	ACE2	Congenital deficiency of other clotting factors (including factor VII) Both hematopoietic	6318	5	3.19859	1.65616	0.0534424	AA
277.51	TMPRSS2	Lipoprotein disorders	7577	59	2.02088	1.04676	0.0535312	AA
949	LY6E	Allergies, other	5910	111	2.1489	1.11655	0.0542807	EA
366.2	ACE2	Senile cataract Both sense organs	7467	1057	-1.39264	0.724637	0.0546258	AA
707.3	ACE2	Chronic ulcer of unspecified site Both dermatologic	7755	44	1.80008	0.937987	0.0549731	AA
512	ACE2	Other symptoms of respiratory system respiratory	5209	1794	1.12925	0.593122	0.056921	EA
496.2	TMPRSS2	Chronic bronchitis	5236	104	2.05539	1.08017	0.0570611	EA
741	TMPRSS2	Symptoms and disorders of the joints	6970	263	1.46681	0.771207	0.0571759	AA
626.12	TMPRSS2	Excessive or frequent menstruation	6255	355	1.36785	0.719978	0.0574521	AA
593	ACE2	Hematuria Both genitourinary	5815	225	-8.45622	4.45341	0.0575885	EA
530.11	TMPRSS2	GERD	6764	2254	1.01469	0.53752	0.0590634	AA
457	ACE2	Encounter for long-term (current) use of anticoagulants, antithrombotics, aspirin circulatory system	5403	237	1.13948	0.603982	0.0592136	AA
269	LY6E	Proteinuria	6640	130	2.0664	1.09545	0.0592485	EA
208	ACE2	Benign neoplasm of colon neoplasms	7477	1066	-1.26749	0.672717	0.0595465	AA
222	ACE2	Benign neoplasm of male genital organs Male neoplasms	7684	4	3.57917	1.90482	0.0602426	AA
797	TMPRSS2	Shock	7909	64	1.9625	1.04456	0.0602741	AA
457.2	LY6E	Encounter for long-term (current) use of antiplatelets/antithrombotics	4501	104	2.12517	1.13238	0.060556	EA
189.2	TMPRSS2	Cancer of bladder	6743	67	2.05267	1.09379	0.0605641	EA
594	LY6E	Urinary calculus	6626	192	2.11114	1.12631	0.0608773	EA
427.2	ACE2	Atrial fibrillation and flutter circulatory system	4438	2510	-1.1214	0.598665	0.0610452	EA
420.3	LY6E	Endocarditis	4922	91	2.09308	1.1175	0.0610673	EA
962.3	TMPRSS2	Hormones and synthetic substitutes causing adverse effects in therapeutic use	6079	69	1.97263	1.05419	0.0613132	AA
722	TMPRSS2	Intervertebral disc disorders	6816	438	1.20738	0.64835	0.0625695	AA
315.3	ACE2	Mental retardation Both mental disorders	7923	8	2.11682	1.13673	0.0625735	AA
415.21	LY6E	Primary pulmonary hypertension	5495	154	2.10638	1.13451	0.0633609	EA
277.5	TMPRSS2	Other disorders of lipoid metabolism	7579	61	1.94481	1.04783	0.0634471	AA
743.4	ACE2	Stress fracture Both musculoskeletal	7362	26	2.19537	1.1851	0.0639568	AA
789	ACE2	Nausea and vomiting symptoms	6895	1423	-1.03627	0.562494	0.0654346	AA
276.12	LY6E	Hyposmolality and/or hyponatremia	4766	217	2.09312	1.13857	0.0660059	EA
292.1	ACE2	Aphasia/speech disturbance Both mental disorders	6763	129	1.27377	0.692973	0.0660445	AA
721	TMPRSS2	Spondylosis and allied disorders	6633	255	1.41664	0.770705	0.0660471	AA
612	ACE2	Breast conditions, congenital or relating to hormones Both genitourinary	6721	47	1.70105	0.927948	0.0667828	AA
516	TMPRSS2	Abnormal sputum	7855	67	1.91456	1.04681	0.0674084	AA
401.2	ACE2	Hypertensive heart and/or renal disease Both circulatory system	3670	1016	0.785353	0.429476	0.0674552	AA
277.6	ACE2	Other deficiencies of circulating enzymes endocrine/metabolic	7527	9	2.46394	1.35022	0.068024	AA
427.21	ACE2	Atrial fibrillation Both circulatory system	4523	2595	-1.07854	0.59245	0.0686873	EA
286.81	ACE2	Primary hypercoagulable state Both hematopoietic	6378	65	1.61456	0.887508	0.0688796	AA
41.1	TMPRSS2	Staphylococcus infections	6536	69	1.90412	1.04959	0.0696541	AA
473	LY6E	Diseases of the larynx and vocal cords	5624	126	1.97898	1.0922	0.0699991	EA
174.1	ACE2	Breast cancer [female] Female neoplasms	6771	256	-3.97675	2.19615	0.0701744	AA
427.4	TMPRSS2	Cardiac arrest and ventricular fibrillation	4224	62	1.96759	1.08699	0.0702749	AA
726.2	ACE2	Synoviopathy Both musculoskeletal	5442	62	1.35322	0.748107	0.0704719	AA
426.2	ACE2	Atrioventricular [AV] block Both circulatory system	2279	351	-2.84605	1.57356	0.0705024	EA
286.2	ACE2	Encounter for long-term (current) use of anticoagulants Both hematopoietic	7121	808	0.726084	0.403318	0.0718165	AA
174.11	ACE2	Malignant neoplasm of female breast Female neoplasms	6843	328	-3.06652	1.70835	0.0726511	AA
275.53	TMPRSS2	Disorders of phosphorus metabolism	6871	215	1.3573	0.759535	0.0739355	AA
476	ACE2	Allergic rhinitis respiratory	6124	1285	-0.965945	0.540658	0.0740006	AA
740.11	TMPRSS2	Osteoarthrosis, localized, primary	6805	1289	0.969919	0.545516	0.0754068	AA
747.11	LY6E	Cardiac shunt/ heart septal defect	6334	234	2.02643	1.14041	0.0755795	EA
592.13	ACE2	Chronic interstitial cystitis Both genitourinary	5381	17	2.09588	1.17992	0.0756851	AA
726.3	ACE2	Bursitis Both musculoskeletal	5470	90	1.33767	0.754493	0.0762382	AA
473.4	LY6E	Voice disturbance	5615	117	1.93255	1.09139	0.076608	EA
199	LY6E	Neoplasm of uncertain behavior	6307	139	1.93248	1.09197	0.0767747	EA
561	TMPRSS2	Symptoms involving digestive system	5856	267	1.40218	0.792355	0.0767887	AA
172.2	TMPRSS2	Other non-epithelial cancer of skin	6256	406	1.41507	0.800956	0.0772735	EA
599.4	TMPRSS2	Urinary incontinence	5570	502	1.18086	0.668958	0.0775256	AA
367.9	ACE2	Blindness and low vision Both sense organs	6484	40	2.66414	1.50948	0.0775731	EA
53	ACE2	Herpes zoster infectious diseases	5894	145	-8.79642	4.98975	0.0779174	AA
327.41	TMPRSS2	Organic or persistent insomnia	5111	88	1.90484	1.08157	0.0782063	AA
599	ACE2	Other symptoms/disorders or the urinary system genitourinary	6306	1238	-0.954085	0.541775	0.0782324	AA
599	LY6E	Other symptoms/disorders or the urinary system	5916	421	1.54224	0.878	0.0789963	EA
512.7	ACE2	Shortness of breath Both respiratory	4905	1490	1.05284	0.600814	0.0797137	EA
282.5	ACE2	Sickle cell anemia hematopoietic	4240	173	-4.0908	2.33883	0.0802772	AA
624.9	ACE2	stress incontinence, female Female genitourinary	6932	125	1.29878	0.745924	0.0816537	AA
380.4	TMPRSS2	Impacted cerumen	6680	96	1.87998	1.08082	0.0819659	EA
1010	ACE2	Other tests Both NULL	7376	5373	-0.546725	0.31514	0.0827651	AA
427.5	LY6E	Arrhythmia (cardiac) NOS	2046	118	2.15693	1.24401	0.0829427	EA
578	LY6E	Gastrointestinal hemorrhage	6352	193	1.91297	1.10471	0.083336	EA
960.2	TMPRSS2	Allergy/adverse effect of penicillin	5279	112	1.8557	1.07192	0.0834161	EA
747.12	LY6E	Valvular heart disease/ heart chambers	6319	219	1.91397	1.10785	0.0840518	EA
401.21	ACE2	Hypertensive heart disease Both circulatory system	3051	397	1.00562	0.58325	0.0846791	AA
401	ACE2	Hypertension circulatory system	6618	3964	0.711302	0.413022	0.0850351	AA
512.8	ACE2	Cough Both respiratory	4993	1537	-0.720976	0.419903	0.0859781	AA
575	ACE2	Other biliary tract disease digestive	7584	50	1.47039	0.858127	0.0866236	AA
202.24	ACE2	Large cell lymphoma Both neoplasms	7861	1	4.77446	2.7985	0.0879941	AA
531.2	TMPRSS2	Gastric ulcer	7851	66	1.7785	1.04709	0.0894105	AA
455	TMPRSS2	Hemorrhoids	5563	397	1.11461	0.656642	0.0896131	AA
530.9	TMPRSS2	Heartburn	4603	93	1.86485	1.09975	0.0899427	AA
473	TMPRSS2	Diseases of the larynx and vocal cords	5036	197	1.85397	1.09363	0.0900283	AA
367.1	TMPRSS2	Myopia	7006	474	1.09212	0.646089	0.0909609	AA
702.2	TMPRSS2	Seborrheic keratosis	7946	99	1.77947	1.05528	0.0917481	AA
440	ACE2	Atherosclerosis circulatory system	6809	158	-5.54666	3.29139	0.0919491	AA
375.2	ACE2	Epiphora Both sense organs	6618	31	1.85255	1.10383	0.0932902	AA
530.1	ACE2	Esophagitis, GERD and related diseases digestive	5540	1199	-2.44208	1.45577	0.0934425	EA
701.2	TMPRSS2	Scar conditions and fibrosis of skin	6602	110	1.7855	1.06509	0.0936634	EA
709.7	TMPRSS2	Unspecified diffuse connective tissue disease	6343	60	1.77246	1.05828	0.0939642	AA
537	ACE2	Other disorders of stomach and duodenum digestive	6837	183	1.03582	0.618562	0.0940193	AA
189.21	TMPRSS2	Malignant neoplasm of bladder	6754	78	1.81838	1.08883	0.0949134	EA
451	TMPRSS2	Phlebitis and thrombophlebitis	5234	68	1.80688	1.08293	0.0952152	AA
531.5	ACE2	Gastrojejunal ulcer Both digestive	7803	18	2.26635	1.36215	0.0961521	AA
599.2	TMPRSS2	Retention of urine	5326	258	1.39134	0.837338	0.0965884	AA
274	ACE2	Gout and other crystal arthropathies endocrine/metabolic	7793	406	-2.26077	1.36107	0.0967089	AA
595	TMPRSS2	Hydronephrosis	7753	84	1.72992	1.04426	0.0976008	AA
292.5	ACE2	Transient alteration of awareness Both mental disorders	5947	6	3.57276	2.1578	0.0977747	EA
278	ACE2	Overweight, obesity and other hyperalimentation Both endocrine/metabolic	6223	2402	0.528511	0.319284	0.0978642	AA
208	TMPRSS2	Benign neoplasm of colon	7477	1066	0.909998	0.550022	0.0980309	AA
870.3	ACE2	Other open wound of head and face Both injuries & poisonings	7196	50	1.39149	0.841275	0.0981232	AA
371	TMPRSS2	Inflammation of the eye	6490	82	1.81241	1.09657	0.0983708	EA
367.4	ACE2	Presbyopia Both sense organs	7860	134	-7.69987	4.6632	0.0986983	AA
200.1	ACE2	Polycythemia vera Both neoplasms	6274	14	3.82096	2.31728	0.0991689	EA
425	ACE2	Cardiomyopathy circulatory system	7452	658	0.697612	0.423084	0.0991735	AA
476	TMPRSS2	Allergic rhinitis	5814	316	1.37539	0.834317	0.0992462	EA
293.1	TMPRSS2	Swelling, mass, or lump in head and neck [Space-occupying lesion, intracranial NOS]	7612	281	1.24878	0.757785	0.0993668	AA
960	TMPRSS2	Poisoning by antibiotics	5291	124	1.76293	1.07032	0.0995353	EA
819	TMPRSS2	Skull and face fracture and other intercranial injury	7946	89	1.71051	1.03867	0.0995941	AA
386.1	ACE2	Meniere's disease sense organs	5968	3	4.13315	2.51849	0.100772	AA
510.2	TMPRSS2	Lung transplant	6436	133	1.75485	1.06964	0.10088	EA
79.9	TMPRSS2	Viremia, NOS	5822	73	1.71919	1.04888	0.101199	AA
362	ACE2	Other retinal disorders sense organs	6282	128	-18.3335	11.2105	0.101966	EA
368	TMPRSS2	Visual disturbances	6581	128	1.7333	1.06529	0.103724	EA
704.1	ACE2	Alopecia Both dermatologic	6608	50	2.90574	1.79887	0.106243	EA
701.4	TMPRSS2	Keloid scar	7379	80	1.68844	1.04618	0.106547	AA
292	LY6E	NEAological disorders	6128	187	1.79069	1.11088	0.106973	EA
694.2	TMPRSS2	Other dyschromia	6103	111	1.71878	1.06669	0.107111	EA
622	ACE2	Polyp of female genital organs Female genitourinary	7788	51	1.96108	1.21818	0.107432	AA
722.1	ACE2	Displacement of intervertebral disc Both musculoskeletal	6639	261	-3.02633	1.88292	0.107998	AA
274.1	ACE2	Gout Both endocrine/metabolic	7927	540	-1.70872	1.06356	0.108142	AA
198.1	TMPRSS2	Secondary malignancy of lymph nodes	7151	66	1.67568	1.04802	0.109842	AA
278.1	ACE2	Obesity Both endocrine/metabolic	6868	3047	0.496125	0.310425	0.109995	AA
350.2	TMPRSS2	Abnormality of gait	7124	272	1.23721	0.775267	0.110521	AA
296.2	LY6E	Depression	4859	578	1.485	0.931536	0.110904	EA
608	ACE2	Other disorders of male genital organs Male genitourinary	6798	132	-5.62259	3.5284	0.111043	AA
527.7	TMPRSS2	Disturbance of salivary secretion	7563	69	1.67053	1.04908	0.111301	AA
457.2	ACE2	Encounter for long-term (current) use of antiplatelets/antithrombotics Both circulatory system	5272	106	1.22077	0.769402	0.112592	AA
724.9	ACE2	Other unspecified back disorders Both musculoskeletal	5877	6	6.11425	3.86757	0.113901	EA
655	ACE2	Known or suspected fetal abnormality affecting management of mother Female pregnancy complications	7823	430	-1.91264	1.21352	0.115	AA
374	TMPRSS2	Other disorders of eyelids	6507	99	1.69383	1.07623	0.11552	EA
695	ACE2	Erythematous conditions dermatologic	6695	342	0.988805	0.628468	0.115636	AA
587	ACE2	Kidney replaced by transpant genitourinary	5225	333	-1.84775	1.17559	0.116004	AA
452	ACE2	Other venous embolism and thrombosis circulatory system	4794	397	1.51487	0.96618	0.116905	EA
425.2	ACE2	Secondary/extrinsic cardiomyopathies Both circulatory system	5213	382	1.25891	0.803691	0.117252	EA
599.4	LY6E	Urinary incontinence	5651	156	1.78658	1.14138	0.117517	EA
624.1	ACE2	Dystrophy of female genital tract Female genitourinary	6667	3	6.67976	4.28497	0.119025	EA
771.1	TMPRSS2	Swelling of limb	6318	133	1.65521	1.0628	0.119372	EA
757	ACE2	Congenital anomalies of the integument congenital anomalies	7933	5	2.72083	1.74815	0.119612	AA
565	ACE2	Anal and rectal conditions digestive	7058	201	-3.77647	2.42786	0.119833	AA
327.71	TMPRSS2	Restless legs syndrome	4920	82	1.66655	1.0715	0.119864	EA
687.1	ACE2	Rash and other nonspecific skin eruption Both dermatologic	6084	143	-9.59314	6.17747	0.120441	EA
1002	ACE2	Symptoms concerning nutrition, metabolism, and development Both NULL	6797	72	2.21485	1.43307	0.122218	EA
960	ACE2	Poisoning by antibiotics injuries & poisonings	6157	147	-4.82314	3.12135	0.122295	AA
401.1	ACE2	Essential hypertension Both circulatory system	7459	4805	0.61166	0.39726	0.123634	AA
626.1	ACE2	Irregular menstrual cycle/bleeding Female genitourinary	6455	57	3.20034	2.08153	0.124172	EA
550	ACE2	Abdominal hernia digestive	7329	396	-2.08432	1.35871	0.125019	AA
81	TMPRSS2	Infection/inflammation of internal prosthetic device; implant; and graft	7729	84	1.59274	1.03895	0.125271	AA
946	TMPRSS2	Anaphylactic shock NOS	5940	68	1.62597	1.06128	0.1255	AA
112.3	TMPRSS2	Candidiasis of skin and nails	6066	62	1.61058	1.05241	0.125926	AA
870	ACE2	Open wounds of head; neck; and trunk injuries & poisonings	7288	142	1.04254	0.681712	0.12619	AA
110.1	ACE2	Dermatophytosis Both infectious diseases	6299	295	-2.35218	1.54011	0.126691	AA
575.1	ACE2	Cholangitis Both digestive	7553	19	1.67027	1.09507	0.127191	AA
286.1	ACE2	Congenital coagulation defects Both hematopoietic	6322	9	2.27605	1.49364	0.127551	AA
8.52	TMPRSS2	Intestinal infection due to C. difficile	7590	86	1.57817	1.03662	0.127904	AA
285.1	TMPRSS2	Acute posthemorrhagic anemia	4398	105	1.64548	1.08086	0.127914	EA
296.2	TMPRSS2	Depression	4367	1052	1.27744	0.839533	0.128106	AA
279.7	TMPRSS2	Other immunological findings	7619	264	1.14794	0.754482	0.128136	AA
41.4	ACE2	E. coli Both infectious diseases	5837	21	2.80707	1.84627	0.12841	EA
285	LY6E	Other anemias	5405	1112	1.24819	0.821678	0.128744	EA
600	TMPRSS2	Hyperplasia of prostate	7511	499	1.32727	0.875345	0.129448	AA
411.1	LY6E	Unstable angina (intermediate coronary syndrome)	3205	215	1.8383	1.21282	0.12959	EA
110	ACE2	Dermatophytosis / Dermatomycosis infectious diseases	6327	323	-2.13566	1.41006	0.129876	AA
366	ACE2	Cataract Both sense organs	7296	886	-1.09601	0.723772	0.12995	AA
516.1	TMPRSS2	Hemoptysis	7880	92	1.57176	1.03836	0.130101	AA
695.8	TMPRSS2	Other specified erythematous conditions	6432	79	1.58714	1.0489	0.130242	AA
381.11	TMPRSS2	Suppurative and unspecified otitis media	7297	102	1.58238	1.04642	0.130489	AA
289.5	ACE2	Diseases of spleen Both hematopoietic	5822	7	3.64593	2.41298	0.130797	EA
530	ACE2	Diseases of esophagus digestive	5626	1285	-1.89811	1.25637	0.130843	EA
681	ACE2	Superficial cellulitis and abscess Both dermatologic	7014	638	-1.30375	0.865729	0.13208	AA
262	ACE2	Mineral deficiency NEC Both endocrine/metabolic	5497	25	1.85617	1.23275	0.13214	AA
426.92	ACE2	Cardiac defibrillator in situ Both circulatory system	4606	444	0.700834	0.465647	0.132305	AA
727.4	TMPRSS2	Ganglion and cyst of synovium, tendon, and bursa	5483	103	1.59576	1.063	0.133307	AA
785	ACE2	Abdominal pain symptoms	6999	2775	-0.523563	0.348907	0.133464	AA
707.1	TMPRSS2	Decubitus ulcer	7806	95	1.56184	1.0412	0.133604	AA
716	TMPRSS2	Other arthropathies	7060	334	1.15641	0.773279	0.134792	AA
41.8	TMPRSS2	H. pylori	6563	96	1.56339	1.04566	0.134883	AA
374	TMPRSS2	Other disorders of eyelids	6851	108	1.59288	1.06582	0.135042	AA
789	TMPRSS2	Nausea and vomiting	6895	1423	0.769695	0.517039	0.136577	AA
368	ACE2	Visual disturbances sense organs	6581	128	-9.9339	6.67511	0.136698	EA
509.1	TMPRSS2	Respiratory failure	6759	270	1.13303	0.761443	0.13675	AA
426.31	ACE2	Right bundle branch block Both circulatory system	4262	100	-6.37753	4.28838	0.136971	AA
394	ACE2	Rheumatic disease of the heart valves circulatory system	6814	195	1.0254	0.6899	0.137198	AA
317	ACE2	Alcohol-related disorders mental disorders	5129	282	-2.00251	1.34906	0.137709	AA
174	ACE2	Breast cancer Both neoplasms	6734	219	-3.08528	2.07878	0.137761	AA
527	TMPRSS2	Diseases of the salivary glands	7579	85	1.54361	1.04152	0.13832	AA
296	LY6E	Mood disorders	4929	648	1.37907	0.931223	0.138627	EA
795.8	ACE2	Abnormal tumor markers symptoms	6876	2	7.03372	4.75333	0.138941	EA
795.82	ACE2	Elevated cancer antigen 125	6876	2	7.03372	4.75333	0.138941	EA
367.1	TMPRSS2	Myopia	6573	129	1.59024	1.07495	0.139043	EA
411.2	ACE2	Myocardial infarction Both circulatory system	6601	561	-1.37602	0.930474	0.139184	AA
411.3	ACE2	Angina pectoris Both circulatory system	6307	267	0.845597	0.573373	0.140273	AA
464	TMPRSS2	Acute sinusitis	5742	337	1.18049	0.800677	0.140382	AA
428.4	ACE2	Heart failure with preserved EF [Diastolic heart failure] Both circulatory system	6436	530	0.724087	0.492056	0.141141	AA
173	TMPRSS2	Neoplasm of uncertain behavior of skin	7835	108	1.52891	1.03992	0.141504	AA
420	LY6E	Carditis	5031	200	1.62326	1.10553	0.14202	EA
110.11	ACE2	Dermatophytosis of nail Both infectious diseases	6224	220	-2.81331	1.92362	0.143603	AA
249	ACE2	Secondary diabetes mellitus endocrine/metabolic	4618	385	0.721504	0.494098	0.144222	AA
444.1	ACE2	Arterial embolism and thrombosis of lower extremity artery Both circulatory system	4858	37	2.60167	1.78306	0.144537	EA
371.1	TMPRSS2	Uveitis, noninfectious or NOS	6857	114	1.52607	1.04895	0.14571	AA
585.4	TMPRSS2	Chronic kidney disease, Stage I or II	4611	91	1.58059	1.08873	0.146565	EA
720	LY6E	Spinal stenosis	6055	184	1.58836	1.09483	0.146839	EA
259	ACE2	Other endocrine disorders endocrine/metabolic	6323	13	2.99796	2.07061	0.147655	EA
691.1	ACE2	Ichthyosis congenita Both dermatologic	6360	7	2.35545	1.62891	0.148168	AA
250.41	LY6E	Impaired fasting glucose	4510	212	1.70114	1.1775	0.14854	EA
759.1	ACE2	Anomalies of endocrine glands, congenital Both congenital anomalies	7939	11	2.26014	1.56537	0.148784	AA
327.32	ACE2	Obstructive sleep apnea Both neurological	6561	1538	0.47884	0.331676	0.148824	AA
500	ACE2	Lung disease due to external agents respiratory	5140	45	2.22594	1.5419	0.148841	EA
793.2	ACE2	Nonspecific abnormal findings on radiological and other examination of other intrathoracic organs (echocardiogram, etc) Both symptoms	7978	123	-6.62991	4.59255	0.148845	AA
382	ACE2	Otalgia Both sense organs	7376	181	1.03604	0.717911	0.148984	AA
695.9	ACE2	Unspecified erythematous condition Both dermatologic	6002	10	2.99256	2.07416	0.149082	EA
433.1	ACE2	Occlusion and stenosis of precerebral arteries Both circulatory system	6953	137	-5.35126	3.71455	0.149692	AA
71	ACE2	Human immunodeficiency virus [HIV] disease infectious diseases	6002	253	-2.33481	1.62469	0.150695	AA
420.2	ACE2	Pericarditis Both circulatory system	4976	145	1.44943	1.00989	0.151218	EA
743.9	ACE2	Osteopenia or other disorder of bone and cartilage Both musculoskeletal	7584	248	-2.81153	1.95919	0.151274	AA
752.1	ACE2	NEAal tube defects Both congenital anomalies	6844	2	5.77126	4.02294	0.151405	EA
697	ACE2	Sarcoidosis Both dermatologic	6582	229	0.979239	0.682725	0.151484	AA
626	ACE2	Disorders of menstruation and other abnormal bleeding from female genital tract Female genitourinary	6763	863	-1.07607	0.751507	0.152177	AA
599.5	ACE2	Frequency of urination and polyuria Both genitourinary	5855	787	-0.935802	0.654634	0.152859	AA
345.1	TMPRSS2	Epilepsy	6772	111	1.48743	1.04371	0.154119	AA
110.12	ACE2	Althete's foot Both infectious diseases	6216	28	2.45523	1.72302	0.154169	EA
496.1	TMPRSS2	Emphysema	5317	185	1.53254	1.07737	0.154888	EA
740.9	ACE2	Osteoarthrosis NOS Both musculoskeletal	5954	352	-3.19758	2.24956	0.155194	EA
562.1	TMPRSS2	Diverticulosis	5947	358	1.1658	0.821415	0.155823	AA
472	TMPRSS2	Chronic pharyngitis and nasopharyngitis	5637	139	1.55167	1.09419	0.156162	EA
365.2	ACE2	Primary angle-closure glaucoma Both sense organs	6837	95	-6.96741	4.92056	0.156782	AA
425.1	ACE2	Primary/intrinsic cardiomyopathies Both circulatory system	5830	999	0.962765	0.680627	0.157208	EA
733	ACE2	Other disorders of bone and cartilage Both musculoskeletal	6808	260	-2.52316	1.78564	0.157648	AA
454.1	TMPRSS2	Varicose veins of lower extremity	5235	69	1.51384	1.07215	0.157961	AA
720.1	LY6E	Spinal stenosis of lumbar region	6040	169	1.54096	1.09231	0.158321	EA
514	LY6E	Abnormal findings examination of lungs	6349	220	1.53355	1.08713	0.158351	EA
704	ACE2	Diseases of hair and hair follicles Both dermatologic	6613	55	2.36435	1.67627	0.158396	EA
41.4	ACE2	E. coli Both infectious diseases	6543	76	-12.1207	8.59487	0.158472	AA
185	LY6E	Cancer of prostate	5929	284	2.06282	1.46327	0.158619	EA
41	ACE2	Bacterial infection NOS infectious diseases	6895	428	-1.63177	1.15878	0.15908	AA
854	ACE2	Complications of cardiac/vascular device, implant, and graft injuries & poisonings	6991	337	0.783621	0.557422	0.159785	AA
728.7	ACE2	Fasciitis Both musculoskeletal	5513	133	1.06952	0.76225	0.160586	AA
561	ACE2	Symptoms involving digestive system Both digestive	5856	267	-2.08045	1.48357	0.16082	AA
427.6	TMPRSS2	Premature beats	4407	245	1.12164	0.799981	0.16089	AA
365	ACE2	Glaucoma sense organs	7376	634	-1.26316	0.901259	0.161048	AA
277	TMPRSS2	Other disorders of metabolism	7623	105	1.45867	1.04076	0.161051	AA
481	ACE2	Influenza respiratory	5763	38	2.511	1.79366	0.161533	EA
555.2	ACE2	Ulcerative colitis Both digestive	5405	43	2.10487	1.50442	0.161776	EA
415.2	ACE2	Chronic pulmonary heart disease Both circulatory system	6038	697	-3.23801	2.32448	0.163618	EA
415.21	TMPRSS2	Primary pulmonary hypertension	5495	154	1.5028	1.07964	0.163938	EA
850	TMPRSS2	Hemorrhage or hematoma complicating a procedure	5389	116	1.48878	1.07157	0.164728	EA
276.5	ACE2	Hypovolemia Both endocrine/metabolic	5561	437	-1.26377	0.909681	0.164759	AA
853	ACE2	Complication of colostomy or enterostomy Both injuries & poisonings	6662	8	2.29858	1.65512	0.164903	AA
626	ACE2	Disorders of menstruation and other abnormal bleeding from female genital tract Female genitourinary	6492	94	2.70777	1.95044	0.16505	EA
452.2	LY6E	Deep vein thrombosis [DVT]	4630	233	1.53542	1.10686	0.165383	EA
379.2	ACE2	Disorders of vitreous body Both sense organs	6900	313	-1.99828	1.44315	0.166154	AA
455	ACE2	Hemorrhoids circulatory system	5563	397	-1.49159	1.07894	0.166832	AA
585.2	ACE2	Renal failure NOS Both genitourinary	4572	52	1.94344	1.40616	0.166943	EA
726	TMPRSS2	Peripheral enthesopathies and allied syndromes	6074	694	0.91988	0.665991	0.167211	AA
189	TMPRSS2	Cancer of urinary organs (incl. kidney and bladder)	6810	134	1.48244	1.0738	0.167415	EA
512.8	ACE2	Cough Both respiratory	3993	578	1.0109	0.732993	0.167849	EA
371.3	TMPRSS2	Inflammation of eyelids	6518	110	1.49352	1.08397	0.168256	EA
465.2	ACE2	Acute pharyngitis Both respiratory	6028	55	2.33853	1.69924	0.168752	EA
586.2	TMPRSS2	Cyst of kidney, acquired	4983	91	1.46825	1.06691	0.168768	AA
465	ACE2	Acute upper respiratory infections of multiple or unspecified sites respiratory	6605	1200	-0.746107	0.542634	0.16914	AA
972.6	ACE2	Antihypertensive agents causing adverse effects Both injuries & poisonings	6012	2	3.63083	2.6485	0.170406	AA
296	TMPRSS2	Mood disorders	4524	1209	1.14338	0.835272	0.171041	AA
800	TMPRSS2	Fracture of lower limb	7325	91	1.41506	1.03466	0.171421	AA
214	TMPRSS2	Lipoma	7815	102	1.42134	1.04055	0.171955	AA
512.9	LY6E	Other dyspnea	4190	775	1.37236	1.00477	0.171989	EA
368.4	ACE2	Visual field defects Both sense organs	6482	29	2.59589	1.90072	0.172021	EA
365	ACE2	Glaucoma sense organs	6447	190	-5.34232	3.9212	0.173065	EA
727.6	ACE2	Rupture of tendon, nontraumatic Both musculoskeletal	5515	135	-3.79337	2.78865	0.173738	AA
241	ACE2	Nontoxic nodular goiter Both endocrine/metabolic	6874	377	-1.91386	1.40741	0.173878	AA
379.9	TMPRSS2	Pain, swelling or discharge of eye	6717	130	1.43241	1.05378	0.174049	AA
345	ACE2	Epilepsy, recurrent seizures, convulsions nEAological	6132	106	2.23888	1.64732	0.174112	EA
687.1	TMPRSS2	Rash and other nonspecific skin eruption	6084	143	1.4493	1.06703	0.174383	EA
634.3	ACE2	Ectopic pregnancy Female pregnancy complications	7453	39	1.79902	1.32521	0.17461	AA
365.11	ACE2	Primary open angle glaucoma Both sense organs	6966	224	-2.3192	1.70922	0.174822	AA
251.1	ACE2	Hypoglycemia Both endocrine/metabolic	3900	100	-4.96877	3.66221	0.174855	AA
851	LY6E	Complications of transplants and reattached limbs	5603	330	1.51171	1.11757	0.176158	EA
506	ACE2	Empyema and pneumothorax respiratory	5146	51	1.9854	1.46812	0.176266	EA
416	ACE2	Cardiomegaly Both circulatory system	6811	155	-3.70431	2.73974	0.176354	AA
340.1	TMPRSS2	Migrain with aura	6575	82	1.41916	1.04966	0.176371	AA
300.1	LY6E	Anxiety disorder	4950	669	1.28054	0.947286	0.17644	EA
379.2	TMPRSS2	Disorders of vitreous body	6542	147	1.43913	1.06643	0.177182	EA
285	ACE2	Other anemias hematopoietic	5405	1112	-1.75145	1.2986	0.177426	EA
362	ACE2	Other retinal disorders sense organs	6690	207	-2.59448	1.92394	0.177489	AA
701.3	ACE2	Circumscribed scleroderma Both dermatologic	6499	7	5.831	4.32942	0.178035	EA
512.7	LY6E	Shortness of breath	4905	1490	1.23201	0.915021	0.178164	EA
401	TMPRSS2	Hypertension	5624	3669	-0.992123	0.736956	0.178223	EA
366.2	TMPRSS2	Senile cataract	7467	1057	0.832591	0.619027	0.178626	AA
414.2	ACE2	ASCVD Both circulatory system	3285	295	-2.54695	1.89571	0.179098	EA
276.14	ACE2	Hypopotassemia Both endocrine/metabolic	5765	641	-0.946463	0.704664	0.179226	AA
819	ACE2	Skull and face fracture and other intercranial injury Both injuries & poisonings	6778	31	2.31146	1.72288	0.179718	EA
454	TMPRSS2	Varicose veins	5241	75	1.43438	1.06974	0.179963	AA
800.2	ACE2	Fracture of unspecified part of femur Both injuries & poisonings	6409	19	3.11439	2.32312	0.180047	EA
564.8	ACE2	Abnormal findings on exam of gastrointestinal tract/ abdominal area Both digestive	8028	70	-12.6699	9.4546	0.180222	AA
275.3	ACE2	Disorders of magnesium metabolism endocrine/metabolic	6939	283	-1.9937	1.49179	0.181402	AA
585	ACE2	Renal failure genitourinary	5774	1254	-1.60898	1.2045	0.181611	EA
286.9	ACE2	Abnormal coagulation profile Both hematopoietic	3829	58	1.75961	1.3175	0.181691	EA
275	ACE2	Disorders of mineral metabolism endocrine/metabolic	7062	406	-1.55355	1.16394	0.181963	AA
327	ACE2	Sleep disorders Both neurological	5788	765	-0.91753	0.687446	0.181976	AA
580.3	TMPRSS2	Nephritis and nephropathy without mention of glomerulonephritis	4973	81	1.39025	1.04404	0.18299	AA
415.1	ACE2	Acute pulmonary heart disease Both circulatory system	6836	180	0.936519	0.704192	0.183545	AA
255.1	ACE2	Adrenal hyperfunction Both endocrine/metabolic	6876	29	1.53741	1.157	0.183917	AA
949	ACE2	Allergies, other Both injuries & poisonings	5910	111	1.83324	1.38425	0.185385	EA
274.11	ACE2	Gouty arthropathy Both endocrine/metabolic	7608	221	-2.45493	1.85594	0.185922	AA
426	TMPRSS2	Cardiac conduction disorders	3517	1589	-1.50628	1.1412	0.186865	EA
578.9	ACE2	Hemorrhage of gastrointestinal tract Both digestive	6719	177	-3.05958	2.32057	0.187349	AA
381.1	TMPRSS2	Otitis media	7322	127	1.3715	1.04206	0.188129	AA
426.9	ACE2	Cardiac pacemaker/device in situ Both circulatory system	4641	479	0.614665	0.467262	0.188355	AA
792.1	ACE2	Papanicolaou smear of cervix or vagina with atypical squamous cells Female genitourinary	6100	332	0.907236	0.69032	0.188771	AA
250.6	ACE2	Polyneuropathy in diabetes Both endocrine/metabolic	4388	155	-2.51755	1.91652	0.188979	AA
740.9	TMPRSS2	Osteoarthrosis NOS	6466	950	0.820441	0.625091	0.189347	AA
365.1	ACE2	Open-angle glaucoma Both sense organs	7107	365	-1.62469	1.24055	0.190312	AA
740.9	LY6E	Osteoarthrosis NOS	5954	352	1.48127	1.13125	0.190397	EA
740.2	TMPRSS2	Osteoarthrosis, generalized	5877	361	1.10246	0.843471	0.191194	AA
442.11	ACE2	Abdominal aortic anEAysm Both circulatory system	4978	157	-5.24643	4.0143	0.191236	EA
287.3	ACE2	Thrombocytopenia Both hematopoietic	4112	341	-4.88373	3.73881	0.191475	EA
425	ACE2	Cardiomyopathy circulatory system	5864	1033	0.886416	0.679197	0.191861	EA
420.3	TMPRSS2	Endocarditis	4922	91	1.40937	1.08012	0.191954	EA
740.9	ACE2	Osteoarthrosis NOS Both musculoskeletal	6466	950	0.657421	0.503978	0.192076	AA
440	ACE2	Atherosclerosis circulatory system	5062	241	-3.62269	2.7783	0.19226	EA
585.1	ACE2	Acute renal failure Both genitourinary	5192	672	-1.56776	1.21003	0.1951	EA
625	TMPRSS2	Pain and other symptoms associated with female genital organs	7165	358	1.03655	0.800948	0.195614	AA
599.9	TMPRSS2	Other abnormality of urination	5423	355	1.02988	0.795849	0.195642	AA
71.1	ACE2	HIV infection, symptomatic Both infectious diseases	5994	245	-1.9569	1.5131	0.195907	AA
79	TMPRSS2	Viral infection	6085	185	1.38375	1.07031	0.196064	EA
624.9	TMPRSS2	stress incontinence, female	6932	125	1.35384	1.04816	0.196483	AA
454.11	ACE2	Varicose veins of lower extremity, symptomtic Both circulatory system	4434	37	2.2222	1.72064	0.196531	EA
447	LY6E	Other disorders of arteries and arterioles	5177	356	1.51409	1.17266	0.196648	EA
740.1	ACE2	Osteoarthritis; localized Both musculoskeletal	5803	201	-4.28492	3.32827	0.197944	EA
372	ACE2	Disorders of conjunctiva sense organs	6813	70	1.1918	0.926129	0.198142	AA
350.2	ACE2	Abnormality of gait Both neurological	7124	272	-1.93798	1.50722	0.198513	AA
433.2	LY6E	Occlusion of cerebral arteries	5515	201	1.40015	1.09024	0.19905	EA
345.12	TMPRSS2	Partial epilepsy	6785	124	1.33766	1.04168	0.199097	AA
521.1	TMPRSS2	Dental caries	7153	122	1.33908	1.04306	0.199212	AA
389.4	ACE2	Tinnitus Both sense organs	6336	86	-14.0941	10.9784	0.199212	EA
605	TMPRSS2	Erectile dysfunction [ED]	7366	700	1.57823	1.22943	0.199242	AA
472	ACE2	Chronic pharyngitis and nasopharyngitis respiratory	5147	308	0.764909	0.596284	0.199565	AA
250.3	ACE2	Insulin pump user Both endocrine/metabolic	4656	358	1.11012	0.865467	0.199602	EA
509	ACE2	Respiratory failure, insufficiency, arrest Both respiratory	5406	311	-7.77957	6.09253	0.201637	EA
189.11	ACE2	Malignant neoplasm of kidney, except pelvis Both neoplasms	8049	146	0.928808	0.727604	0.201768	AA
747.11	ACE2	Cardiac shunt/ heart septal defect Both congenital anomalies	7922	75	-11.3924	8.92551	0.20182	AA
638	ACE2	Other high-risk pregnancy Female pregnancy complications	8096	411	-1.50078	1.17761	0.202514	AA
509	LY6E	Respiratory failure, insufficiency, arrest	5406	311	1.40979	1.10695	0.202812	EA
506	ACE2	Empyema and pneumothorax respiratory	6528	39	1.40178	1.10079	0.202865	AA
427.61	ACE2	Supraventricular premature beats Both circulatory system	2034	106	-4.49752	3.5337	0.203107	EA
742.9	TMPRSS2	Other derangement of joint	6841	134	1.3307	1.04562	0.203145	AA
41	LY6E	Bacterial infection NOS	6108	292	1.38119	1.08727	0.203966	EA
585.3	ACE2	Chronic renal failure [CKD] Both genitourinary	5584	1064	-1.65847	1.30596	0.20411	EA
300.11	TMPRSS2	Generalized anxiety disorder	3580	265	1.55438	1.22464	0.20435	AA
580.31	TMPRSS2	Nephritis and nephropathy in diseases classified elsewhere	4976	84	1.32633	1.04506	0.20439	AA
429.1	ACE2	Heart transplant/surgery Both circulatory system	6077	171	0.822275	0.64804	0.204489	AA
564.9	ACE2	Personal history of diseases of digestive system Both digestive	5633	44	1.31775	1.03886	0.204637	AA
323.2	ACE2	Acute (transverse) myelitis Both neurological	7973	2	3.72683	2.93829	0.204668	AA
8.5	ACE2	Bacterial enteritis Both infectious diseases	7625	121	-4.38751	3.46344	0.205224	AA
740.11	ACE2	Osteoarthrosis, localized, primary Both musculoskeletal	6805	1289	-0.786117	0.621883	0.206197	AA
994	ACE2	Sepsis and SIRS injuries & poisonings	7501	178	-2.96222	2.34552	0.206616	AA
722.6	LY6E	Degeneration of intervertebral disc	6051	180	1.38795	1.09905	0.206639	EA
275.6	ACE2	Hypercalcemia Both endocrine/metabolic	6861	205	-2.45225	1.9419	0.206659	AA
362.3	ACE2	Other nondiabetic retinopathy Both sense organs	6549	66	-9.77246	7.75158	0.207415	AA
610.1	ACE2	Cystic mastopathy Female genitourinary	6735	61	1.54082	1.22284	0.207659	AA
454.11	TMPRSS2	Varicose veins of lower extremity, symptomtic	5259	93	1.34386	1.06661	0.207692	AA
575.2	ACE2	Obstruction of bile duct Both digestive	7562	28	1.46522	1.16374	0.208006	AA
586.3	ACE2	Vascular disorders of kidney/hypertrophy Both genitourinary	4902	10	2.27207	1.80766	0.208785	AA
536	ACE2	Disorders of function of stomach digestive	6340	78	-14.057	11.1853	0.208846	EA
394.2	ACE2	Mitral valve disease Both circulatory system	4196	226	1.95171	1.55383	0.209095	EA
284.1	ACE2	Pancytopenia Both hematopoietic	4139	72	-7.52011	5.98707	0.209095	AA
1005	ACE2	Other symptoms Both NULL	7956	92	-5.8577	4.66998	0.209722	AA
528	ACE2	Diseases of the oral soft tissues, excluding lesions specific for gingiva and tongue digestive	7570	76	-10.6271	8.47696	0.209973	AA
593	LY6E	Hematuria	5815	225	1.39075	1.10963	0.210078	EA
567	ACE2	Peritonitis and retroperitoneal infections digestive	6940	83	-7.25888	5.79218	0.210125	AA
427.5	ACE2	Arrhythmia (cardiac) NOS Both circulatory system	4250	88	-4.31442	3.44273	0.210135	AA
498	ACE2	Acute bronchospasm Both respiratory	5562	16	1.76663	1.411	0.210553	AA
250.4	ACE2	Abnormal glucose Both endocrine/metabolic	5084	851	0.524891	0.419669	0.211034	AA
369.5	TMPRSS2	Conjunctivitis, infectious	6879	136	1.31163	1.05023	0.211701	AA
457.3	ACE2	Encounter for long-term (current) use of aspirin Both circulatory system	4811	414	1.04313	0.835503	0.211847	EA
740	ACE2	Osteoarthrosis musculoskeletal	6094	492	-2.09066	1.67652	0.21239	EA
415	ACE2	Pulmonary heart disease circulatory system	6047	706	-2.59165	2.08226	0.213266	EA
994.2	ACE2	Sepsis Both injuries & poisonings	7698	375	-1.51891	1.22147	0.213681	AA
459.7	TMPRSS2	Blood vessel replaced	5926	87	1.2943	1.04113	0.213805	AA
790.6	LY6E	Other abnormal blood chemistry	6503	239	1.35131	1.08749	0.214016	EA
252	TMPRSS2	Disorders of parathyroid gland	6961	114	1.29812	1.04489	0.214109	AA
278	ACE2	Overweight, obesity and other hyperalimentation Both endocrine/metabolic	6130	1115	-1.18234	0.951878	0.214195	EA
442.1	LY6E	Aortic anEAysm	5348	527	1.45413	1.17418	0.215557	EA
256	TMPRSS2	Ovarian dysfunction	6980	133	1.31603	1.06514	0.216626	AA
990	ACE2	Effects radiation NOS injuries & poisonings	7247	170	-2.80459	2.27036	0.216717	AA
627	TMPRSS2	Menopausal and postmenopausal disorders	6282	382	1.02771	0.832091	0.216795	AA
327.4	TMPRSS2	Insomnia	5666	643	0.837686	0.678889	0.217238	AA
250.3	LY6E	Insulin pump user	4656	358	1.43417	1.16304	0.217532	EA
389.1	ACE2	Sensorineural hearing loss Both sense organs	7447	247	-1.97677	1.60642	0.218492	AA
716.9	TMPRSS2	Arthropathy NOS	7129	403	0.948971	0.771558	0.218719	AA
260.2	TMPRSS2	severe protein-calorie malnutrition	5587	115	1.29873	1.05612	0.218802	AA
277.6	ACE2	Other deficiencies of circulating enzymes endocrine/metabolic	6461	3	3.63959	2.96258	0.219253	EA
514	ACE2	Abnormal findings examination of lungs respiratory	6349	220	1.53194	1.24709	0.219292	EA
380.1	ACE2	Otitis externa Both sense organs	7464	98	-5.87367	4.78233	0.21937	AA
562.2	ACE2	Diverticulitis Both digestive	5703	114	-3.79702	3.09464	0.219834	AA
427	ACE2	Cardiac dysrhythmias circulatory system	5500	3572	-0.661304	0.539006	0.219862	EA
705	ACE2	Disorders of sweat glands Both dermatologic	6350	6	5.46713	4.45776	0.220037	EA
286	ACE2	Coagulation defects Both hematopoietic	6471	158	0.936571	0.764575	0.220592	AA
411.4	TMPRSS2	Coronary atherosclerosis	7268	1228	-1.31003	1.07034	0.220976	AA
272.11	TMPRSS2	Hypercholesterolemia	3320	1221	-1.51049	1.23414	0.220983	EA
594	ACE2	Urinary calculus Both genitourinary	7843	174	0.902381	0.738866	0.221971	AA
276	TMPRSS2	Disorders of fluid, electrolyte, and acid-base balance	6257	1133	-1.2699	1.04052	0.222295	AA
550.4	ACE2	Umbilical hernia Both digestive	7077	144	-3.23672	2.65568	0.222924	AA
612.3	ACE2	Congenital anomalies of breast Both genitourinary	6677	3	3.20464	2.62998	0.223033	AA
612.2	ACE2	Hypertrophy of breast (Gynecomastia) Both genitourinary	6742	68	1.15455	0.948153	0.223345	AA
751.21	ACE2	Cystic kidney disease Both congenital anomalies	7940	74	-8.80388	7.24947	0.224589	AA
599.3	ACE2	Dysuria Both genitourinary	5495	427	-1.14382	0.942498	0.2249	AA
429.3	LY6E	Symptoms involving cardiovascular system	3389	147	1.422	1.1724	0.22517	EA
452.2	TMPRSS2	Deep vein thrombosis [DVT]	4630	233	1.31278	1.0824	0.225189	EA
477	ACE2	Epistaxis or throat hemorrhage Both respiratory	5577	79	-11.7089	9.65901	0.225427	EA
427.3	ACE2	Other specified cardiac dysrhythmias Both circulatory system	4563	401	0.662305	0.546898	0.225887	AA
375.1	ACE2	Dry eyes Both sense organs	6777	190	-2.47334	2.04319	0.226076	AA
282	ACE2	Hereditary hemolytic anemias hematopoietic	4255	188	-1.74703	1.44558	0.226841	AA
78	ACE2	Viral warts & HPV infectious diseases	5900	151	-2.66572	2.2085	0.227422	AA
428.3	ACE2	Heart failure with reduced EF [Systolic or combined heart failure] Both circulatory system	6675	769	0.502402	0.416538	0.227765	AA
526	ACE2	Diseases of the jaws digestive	7096	65	-10.0329	8.32408	0.228093	AA
535.9	TMPRSS2	Gastritis and duodenitis, NOS	6791	137	1.26838	1.05317	0.228455	AA
916	TMPRSS2	Contusion	7512	374	0.911066	0.756837	0.228674	AA
447.1	ACE2	Stricture of artery Both circulatory system	4832	11	2.65142	2.2041	0.228996	EA
741.4	ACE2	Joint effusions Both musculoskeletal	6954	247	-1.8585	1.54691	0.229586	AA
285.1	ACE2	Acute posthemorrhagic anemia Both hematopoietic	4243	176	-1.86447	1.55197	0.229612	AA
706.1	ACE2	Acne Both dermatologic	6813	205	-2.40928	2.00836	0.230284	AA
705.3	ACE2	Hidradenitis Both dermatologic	6350	6	5.23948	4.36856	0.230387	EA
276.4	ACE2	Acid-base balance disorder Both endocrine/metabolic	5268	144	-2.47208	2.06172	0.230512	AA
452	TMPRSS2	Other venous embolism and thrombosis	5741	575	0.786649	0.657432	0.231483	AA
425.1	ACE2	Primary/intrinsic cardiomyopathies Both circulatory system	7590	796	0.501711	0.419631	0.231852	AA
447	ACE2	Other disorders of arteries and arterioles circulatory system	6901	250	0.760022	0.635746	0.2319	AA
655.1	ACE2	Abnormality in fetal heart rate or rhythm Female pregnancy complications	7533	140	-3.02383	2.52956	0.23193	AA
751	ACE2	Genitourinary congenital anomalies Both congenital anomalies	7939	73	-8.75219	7.33144	0.232561	AA
454.1	ACE2	Varicose veins of lower extremity Both circulatory system	5235	69	1.32493	1.10991	0.232585	AA
840.2	ACE2	Rotator cuff (capsule) sprain Both injuries & poisonings	6270	66	-8.39665	7.04205	0.23312	AA
426.3	ACE2	Bundle branch block Both circulatory system	2321	393	0.816203	0.684841	0.233334	EA
241.2	ACE2	Nontoxic multinodular goiter Both endocrine/metabolic	6737	240	0.923059	0.774854	0.233548	AA
687.1	TMPRSS2	Rash and other nonspecific skin eruption	5941	692	0.79547	0.668064	0.233767	AA
442	LY6E	Other anEAysm	5379	558	1.39293	1.17003	0.233849	EA
245.2	ACE2	Chronic thyroiditis Both endocrine/metabolic	6510	13	2.28584	1.92097	0.234071	AA
426.32	ACE2	Left bundle branch block Both circulatory system	4283	121	0.87887	0.738668	0.234124	AA
745	ACE2	Pain in joint musculoskeletal	7165	3192	-0.388855	0.327232	0.234709	AA
459.9	LY6E	Circulatory disease NEC	5487	245	1.31416	1.10642	0.234931	EA
752	ACE2	Nervous system congenital anomalies Both congenital anomalies	6844	2	4.22421	3.5569	0.234986	EA
300	TMPRSS2	Anxiety, phobic and dissociative disorders	4038	723	1.11425	0.939143	0.235443	AA
189	ACE2	Cancer of urinary organs (incl. kidney and bladder) neoplasms	6810	134	-5.48901	4.6335	0.236162	EA
395.3	ACE2	Nonrheumatic tricuspid valve disorders Both circulatory system	4038	68	-10.9528	9.26221	0.236997	EA
306.9	ACE2	Tension headache Both mental disorders	3371	56	-7.35382	6.22366	0.237368	AA
286.5	ACE2	Hemorrhagic disorder due to intrinsic circulating anticoagulants Both hematopoietic	6317	4	2.33548	1.98107	0.238439	AA
727	TMPRSS2	Other disorders of synovium, tendon, and bursa	5832	452	0.921815	0.781933	0.238441	AA
260.1	ACE2	Cachexia Both endocrine/metabolic	5498	26	1.36758	1.16046	0.238603	AA
244.4	ACE2	Hypothyroidism NOS Both endocrine/metabolic	6138	905	-1.98626	1.68633	0.238855	EA
835	TMPRSS2	Internal derangement of knee	7775	123	1.21616	1.0342	0.23962	AA
495.2	ACE2	Asthma with exacerbation Both respiratory	5181	49	2.25782	1.92719	0.241373	EA
585.1	ACE2	Acute renal failure Both genitourinary	6042	1150	-0.585666	0.499951	0.241419	AA
800	ACE2	Fracture of lower limb injuries & poisonings	6439	49	2.43826	2.08336	0.241862	EA
706.2	ACE2	Sebaceous cyst Both dermatologic	6415	71	-12.6852	10.8392	0.24188	EA
411	TMPRSS2	Ischemic Heart Disease	5897	2907	-0.860088	0.735267	0.242096	EA
338.1	TMPRSS2	Acute pain	6458	172	1.22662	1.04975	0.242612	AA
280.2	ACE2	Iron deficiency anemia secondary to blood loss (chronic) Both hematopoietic	4272	205	-1.58936	1.36084	0.242836	AA
798	ACE2	Malaise and fatigue symptoms	5874	1434	0.76549	0.656047	0.243282	EA
286	ACE2	Coagulation defects Both hematopoietic	3886	115	1.3553	1.16218	0.243546	EA
611.3	ACE2	Lump or mass in breast Both genitourinary	6581	58	-14.2526	12.2329	0.243976	EA
411.4	TMPRSS2	Coronary atherosclerosis	5871	2881	-0.858464	0.737166	0.244203	EA
963	ACE2	Poisoning by primarily systemic agents injuries & poisonings	5285	118	1.53658	1.32	0.244393	EA
819	ACE2	Skull and face fracture and other intercranial injury Both injuries & poisonings	7946	89	-5.68705	4.88804	0.244642	AA
1015	ACE2	Effects of other external causes Both NULL	7570	379	-1.3308	1.14566	0.245395	AA
291.8	ACE2	Alteration of consciousness Both mental disorders	6702	68	-8.0375	6.92631	0.245873	AA
512	ACE2	Other symptoms of respiratory system respiratory	5944	2488	-0.388336	0.335177	0.246619	AA
250.6	ACE2	PolynEAopathy in diabetes Both endocrine/metabolic	4392	94	-6.3473	5.47855	0.24663	EA
626.2	ACE2	Dysmenorrhea Female genitourinary	6402	4	5.49861	4.74735	0.246763	EA
573.6	ACE2	Nonspecific elevation of levels of transaminase or lactic acid dehydrogenase [LDH] Both digestive	6601	117	-3.5932	3.10858	0.247723	AA
367	TMPRSS2	Disorders of refraction and accommodation; blindness and low vision	6644	200	1.2245	1.05979	0.24792	EA
433.21	LY6E	Cerebral artery occlusion, with cerebral infarction	5572	258	1.25889	1.08974	0.247999	EA
475.9	ACE2	Postnasal drip Both respiratory	4964	125	-2.75796	2.3877	0.248062	AA
428	TMPRSS2	Congestive heart failure; nonhypertensive	5331	2089	-0.986041	0.857278	0.250062	EA
994.2	TMPRSS2	Sepsis	7698	375	0.866872	0.755314	0.251093	AA
427.21	TMPRSS2	Atrial fibrillation	4523	2595	-1.06404	0.927597	0.251343	EA
495	ACE2	Asthma respiratory	6979	1433	-0.582345	0.507911	0.251569	AA
280.1	LY6E	Iron deficiency anemias, unspecified or not due to blood loss	4591	298	1.33315	1.16307	0.251699	EA
110.13	ACE2	Dermatophytosis of the body Both infectious diseases	6069	65	-8.61616	7.51834	0.251787	AA
316	ACE2	Substance addiction and disorders mental disorders	5415	568	-0.885435	0.773149	0.252113	AA
531.2	ACE2	Gastric ulcer Both digestive	7851	66	-7.30098	6.38315	0.252711	AA
367.8	ACE2	Hypermetropia Both sense organs	6788	256	-1.68611	1.4752	0.253051	AA
296.1	ACE2	Bipolar mental disorders	4349	68	-10.1202	8.85533	0.253108	EA
689	TMPRSS2	Disorder of skin and subcutaneous tissue NOS	7716	131	1.18018	1.03433	0.253865	AA
347	ACE2	Cataplexy and narcolepsy neurological	6681	20	1.53197	1.34485	0.254646	AA
338.2	TMPRSS2	Chronic pain	7018	732	0.74135	0.650926	0.254739	AA
536.3	ACE2	Gastroparesis Both digestive	6764	110	-3.69563	3.24582	0.254879	AA
334.1	ACE2	Spinocerebellar disease Both neurological	6662	1	4.40363	3.88723	0.25728	AA
366	TMPRSS2	Cataract	7296	886	0.813498	0.718297	0.257409	AA
401.1	TMPRSS2	Essential hypertension	5720	3765	-0.767918	0.679749	0.258599	EA
600	LY6E	Hyperplasia of prostate	6214	569	1.59177	1.40981	0.25887	EA
772.2	ACE2	Spasm of muscle Both symptoms	7103	163	-2.53278	2.25528	0.261417	AA
289.8	ACE2	Polycythemia, secondary Both hematopoietic	5780	17	2.46926	2.2026	0.262261	EA
418	LY6E	Nonspecific chest pain	5938	1038	1.02819	0.917462	0.26242	EA
427.61	TMPRSS2	Supraventricular premature beats	2034	106	1.27471	1.13851	0.262874	EA
394.7	LY6E	Disease of tricuspid valve	4208	238	1.27015	1.13485	0.263044	EA
611.3	TMPRSS2	Lump or mass in breast	7003	329	0.871175	0.779524	0.26375	AA
256.4	TMPRSS2	Polycystic ovaries	7007	160	1.1962	1.07083	0.263962	AA
364.1	ACE2	Corneal opacity Both sense organs	6757	15	1.66713	1.494	0.264471	AA
496	TMPRSS2	Chronic airway obstruction	5858	726	0.899183	0.805918	0.26454	EA
270.32	ACE2	Paraproteinemia Both endocrine/metabolic	6537	27	2.21362	1.98562	0.264924	EA
585.3	ACE2	Chronic renal failure [CKD] Both genitourinary	6275	1383	-0.486183	0.436489	0.265343	AA
709	TMPRSS2	Diffuse diseases of connective tissue	6396	113	1.16894	1.04959	0.265404	AA
428.1	TMPRSS2	Congestive heart failure (CHF) NOS	7020	1114	-1.16183	1.04808	0.267631	AA
960.2	ACE2	Allergy/adverse effect of penicillin Both injuries & poisonings	6205	195	-1.95256	1.76321	0.268126	AA
355	ACE2	Complex regional/central pain syndrome Both neurological	6642	46	-10.9302	9.87078	0.268151	AA
242.2	ACE2	Toxic multinodular goiter Both endocrine/metabolic	6507	10	2.18586	1.97415	0.268189	AA
531.4	ACE2	Peptic ulcer, site unspecified Both digestive	7857	72	-6.96835	6.29753	0.268501	AA
345	ACE2	Epilepsy, recurrent seizures, convulsions neurological	6960	299	-1.45828	1.31809	0.26857	AA
371.3	ACE2	Inflammation of eyelids Both sense organs	6938	195	-2.09283	1.89469	0.269343	AA
457	LY6E	Encounter for long-term (current) use of anticoagulants, antithrombotics, aspirin	4703	306	1.22495	1.10922	0.269448	EA
442	ACE2	Other anEAysm circulatory system	5379	558	-2.31398	2.09613	0.269624	EA
429.2	ACE2	Abnormal function study of cardiovascular system Both circulatory system	3471	229	-4.85163	4.3999	0.270172	EA
110.12	ACE2	Althete's foot Both infectious diseases	6134	130	-2.64078	2.3958	0.270351	AA
550.6	TMPRSS2	Incisional hernia	7068	135	1.14139	1.03569	0.270435	AA
557.1	ACE2	Celiac disease Both digestive	5601	12	2.10925	1.91764	0.271367	AA
706	ACE2	Diseases of sebaceous glands dermatologic	6895	287	-1.51367	1.37702	0.271666	AA
327.7	ACE2	Sleep related movement disorders Both neurological	5102	79	-4.13611	3.76325	0.271734	AA
386.9	LY6E	Dizziness and giddiness (Light-headedness and vertigo)	6033	734	0.92417	0.841441	0.272066	EA
735.3	TMPRSS2	Hallux valgus (Bunion)	7289	132	1.14188	1.03985	0.272154	AA
180.3	ACE2	Cervical intraepithelial neoplasia [CIN] [Cervical dysplasia] Female neoplasms	5924	156	0.985301	0.897927	0.272508	AA
292.1	TMPRSS2	Aphasia/speech disturbance	6763	129	1.14171	1.04095	0.272729	AA
202.22	ACE2	Reticulosarcoma Both neoplasms	7873	13	1.98018	1.80797	0.273408	AA
440.22	ACE2	Atherosclerosis of native arteries of the extremities with intermittent claudication Both circulatory system	6749	98	-3.57259	3.26212	0.273441	AA
245.21	ACE2	Chronic lymphocytic thyroiditis Both endocrine/metabolic	6520	23	1.80013	1.64395	0.273516	AA
136	ACE2	Other infectious and parasitic diseases infectious diseases	6651	78	-8.04811	7.35306	0.273725	EA
159.3	ACE2	Malignant neoplasm of gallbladder and extrahepatic bile ducts Both neoplasms	7480	7	2.01436	1.84195	0.274131	AA
601.11	ACE2	Acute prostatitis Male genitourinary	7016	4	1.94308	1.77861	0.274625	AA
963.1	ACE2	Antineoplastic and immunosuppressive drugs causing adverse effects Both injuries & poisonings	6209	199	-1.74823	1.6008	0.274791	AA
427.41	ACE2	Ventricular fibrillation and flutter Both circulatory system	4204	42	1.0908	0.999451	0.275097	AA
592	ACE2	Cystitis and urethritis genitourinary	5406	42	1.2427	1.1389	0.275211	AA
292.4	ACE2	Altered mental status Both mental disorders	6819	185	0.822231	0.753873	0.275416	AA
743.9	ACE2	Osteopenia or other disorder of bone and cartilage Both musculoskeletal	6300	244	-7.93211	7.27282	0.275426	EA
599.2	ACE2	Retention of urine genitourinary	5326	258	-1.23805	1.13832	0.276765	AA
963	TMPRSS2	Poisoning by primarily systemic agents	6153	143	1.13736	1.04739	0.27752	AA
426.9	TMPRSS2	Cardiac pacemaker/device in situ	3150	1222	-1.2356	1.13974	0.278319	EA
585.33	ACE2	Chronic Kidney Disease, Stage III Both genitourinary	5002	482	-1.58836	1.46735	0.279047	EA
275.3	ACE2	Disorders of magnesium metabolism endocrine/metabolic	6100	150	-4.13924	3.83317	0.28021	EA
193	ACE2	Thyroid cancer neoplasms	6801	71	1.88722	1.7522	0.281455	EA
444	ACE2	Arterial embolism and thrombosis circulatory system	4876	55	1.98216	1.84163	0.281787	EA
276.41	TMPRSS2	Acidosis	5430	306	0.820453	0.76274	0.282077	AA
270.3	ACE2	Disorders of plasma protein metabolism Both endocrine/metabolic	7233	62	-6.7115	6.2408	0.282185	AA
539	ACE2	Bariatric surgery Both digestive	6610	512	-2.78723	2.59198	0.282228	EA
415.2	TMPRSS2	Chronic pulmonary heart disease	6038	697	0.861897	0.802311	0.282703	EA
288.2	ACE2	Elevated white blood cell count Both hematopoietic	5913	98	-5.69988	5.30593	0.282712	EA
428.1	TMPRSS2	Congestive heart failure (CHF) NOS	4661	1419	-1.1911	1.10882	0.282731	EA
530.11	ACE2	GERD Both digestive	5693	1352	-1.08318	1.00842	0.28276	EA
426.8	ACE2	Other cardiac conduction disorders Both circulatory system	4221	59	-4.50207	4.19274	0.282923	AA
512.2	ACE2	Painful respiration Both respiratory	3447	32	1.97812	1.84354	0.283271	EA
751.2	ACE2	Congenital anomalies of urinary system Both congenital anomalies	7929	63	-7.63575	7.1225	0.283693	AA
70.4	ACE2	Chronic hepatitis Both infectious diseases	5796	47	1.21429	1.13277	0.283734	AA
134.1	ACE2	Intestinal helminthiases Both infectious diseases	7295	3	3.13512	2.92887	0.28443	AA
733	ACE2	Other disorders of bone and cartilage Both musculoskeletal	6301	214	-7.76925	7.26513	0.284895	EA
710	ACE2	Osteomyelitis, periostitis, and other infections involving bone musculoskeletal	6792	66	-5.80676	5.43467	0.28531	AA
710.1	ACE2	Osteomyelitis Both musculoskeletal	6792	66	-5.80676	5.43467	0.28531	AA
287	ACE2	Purpura and other hemorrhagic conditions hematopoietic	4035	264	-3.93178	3.67993	0.285322	EA
411	TMPRSS2	Ischemic Heart Disease	7097	1057	-1.14612	1.07415	0.285968	AA
276.41	ACE2	Acidosis Both endocrine/metabolic	5430	306	-1.04576	0.980806	0.286323	AA
427.9	ACE2	Palpitations Both circulatory system	3236	1308	-0.735078	0.689584	0.286436	EA
475	TMPRSS2	Chronic sinusitis	5766	268	1.15444	1.08428	0.287009	EA
456	TMPRSS2	Chronic venous insufficiency [CVI]	5295	129	1.13219	1.06409	0.287332	AA
433.21	ACE2	Cerebral artery occlusion, with cerebral infarction Both circulatory system	5572	258	-2.49707	2.34917	0.287802	EA
216	TMPRSS2	Benign neoplasm of skin	3913	140	1.17011	1.1024	0.288499	AA
977	TMPRSS2	Personal history of allergy to medicinal agents	6157	147	1.1082	1.0441	0.28851	AA
426	ACE2	Cardiac conduction disorders circulatory system	4866	704	0.439023	0.41434	0.28934	AA
415	TMPRSS2	Pulmonary heart disease	6047	706	0.849014	0.801395	0.289409	EA
38	ACE2	Septicemia infectious diseases	6807	340	-1.19362	1.12732	0.289685	AA
798	TMPRSS2	Malaise and fatigue	6857	1523	0.591575	0.558826	0.289781	AA
296	ACE2	Mood disorders mental disorders	4524	1209	0.362229	0.342216	0.289837	AA
701.2	ACE2	Scar conditions and fibrosis of skin Both dermatologic	6602	110	1.58062	1.49368	0.289962	EA
427.11	TMPRSS2	Paroxysmal supraventricular tachycardia	2324	396	0.924134	0.874915	0.290851	EA
420.2	ACE2	Pericarditis Both circulatory system	6919	125	-2.66995	2.53015	0.29131	AA
296.2	ACE2	Depression mental disorders	4367	1052	0.377435	0.358278	0.292125	AA
428.4	ACE2	Heart failure with preserved EF [Diastolic heart failure] Both circulatory system	3722	480	-2.35814	2.24451	0.293431	EA
285	TMPRSS2	Other anemias	6247	2180	-0.693863	0.660594	0.293552	AA
426.2	ACE2	Atrioventricular [AV] block Both circulatory system	4290	128	-1.98641	1.8921	0.293789	AA
429	ACE2	Ill-defined descriptions and complications of heart disease circulatory system	3567	325	-2.94115	2.80185	0.293847	EA
619.3	ACE2	Noninflammatory disorders of cervix Female genitourinary	6755	42	-9.34755	8.91785	0.294554	AA
425.2	LY6E	Secondary/extrinsic cardiomyopathies	5213	382	1.1557	1.10537	0.295776	EA
427.61	ACE2	Supraventricular premature beats Both circulatory system	4228	66	-4.22562	4.04323	0.295971	AA
426.3	LY6E	Bundle branch block	2321	393	1.28763	1.23652	0.297722	EA
761	TMPRSS2	Cervicalgia	7345	698	0.675265	0.649615	0.298579	AA
395.6	ACE2	Heart valve replaced Both circulatory system	6798	179	-2.05953	1.98212	0.298779	AA
572	ACE2	Ascites (non malignant) digestive	6589	105	-3.23569	3.12033	0.29975	AA
530.3	ACE2	Stricture and stenosis of esophagus Both digestive	4381	40	1.6794	1.62071	0.300104	EA
255.11	ACE2	Cushing's syndrome Both endocrine/metabolic	6857	10	2.07429	2.00254	0.300281	AA
586	ACE2	Other disorders of the kidney and ureters genitourinary	5398	506	-0.761419	0.735263	0.300401	AA
216	LY6E	Benign neoplasm of skin	5655	387	1.1607	1.12114	0.300533	EA
361.1	ACE2	Retinal detachment with retinal defect Both sense organs	6268	11	2.26374	2.18677	0.300576	EA
530.11	ACE2	GERD Both digestive	6764	2254	-0.396322	0.382966	0.300727	AA
426.32	ACE2	Left bundle branch block Both circulatory system	2236	308	0.762252	0.736787	0.300873	EA
433.8	ACE2	Late effects of cerebrovascular disease Both circulatory system	5386	72	-6.64879	6.42776	0.300956	EA
735.1	ACE2	Flat foot Both musculoskeletal	7224	67	-5.33191	5.1571	0.301185	AA
613.9	ACE2	Breast disorder NOS Both genitourinary	6762	7	5.05327	4.89167	0.301588	EA
433.1	ACE2	Occlusion and stenosis of precerebral arteries Both circulatory system	5761	447	-2.35441	2.2833	0.302474	EA
426.3	ACE2	Bundle branch block Both circulatory system	4314	152	0.729236	0.707821	0.30289	AA
300.1	TMPRSS2	Anxiety disorder	4142	827	0.971994	0.94615	0.304272	AA
594	TMPRSS2	Urinary calculus	7843	174	1.06881	1.04062	0.30438	AA
512	TMPRSS2	Other symptoms of respiratory system	5209	1794	-0.8069	0.785814	0.304499	EA
38.3	ACE2	Bacteremia Both infectious diseases	6594	127	-2.49351	2.43085	0.304997	AA
279	TMPRSS2	Disorders involving the immune mechanism	6691	297	1.10534	1.07776	0.305085	EA
721.1	ACE2	Spondylosis without myelopathy Both musculoskeletal	6898	520	-0.853141	0.833042	0.305775	AA
789	LY6E	Nausea and vomiting	6358	318	1.12016	1.09568	0.306621	EA
577	ACE2	Diseases of pancreas digestive	8007	153	-2.47272	2.42105	0.307092	AA
300.4	ACE2	Dysthymic disorder Both mental disorders	4383	102	-4.36761	4.27721	0.30719	EA
81	ACE2	Infection/inflammation of internal prosthetic device; implant; and graft infectious diseases	6561	68	-8.14233	7.97511	0.30727	EA
242.1	ACE2	Graves' disease endocrine/metabolic	6609	112	-3.11441	3.05069	0.307309	AA
702.1	ACE2	Actinic keratosis Both dermatologic	6504	339	-3.45734	3.38998	0.30779	EA
474	ACE2	Acute and chronic tonsillitis respiratory	4903	64	1.03517	1.01674	0.30862	AA
358	ACE2	MyonEAal disorders nEAological	6480	6	3.77026	3.70728	0.309159	EA
358.1	ACE2	Myasthenia gravis nEAological	6480	6	3.77026	3.70728	0.309159	EA
871	TMPRSS2	Open wounds of extremities	7316	170	1.05692	1.03951	0.309272	AA
440.1	ACE2	Atherosclerosis of renal artery Both circulatory system	4869	48	-10.09	9.93264	0.309706	EA
645	ACE2	Late pregnancy and failed induction Female pregnancy complications	8150	8	2.44206	2.40654	0.310221	AA
193	ACE2	Thyroid cancer neoplasms	7965	108	-3.57177	3.52522	0.310963	AA
276.6	ACE2	Fluid overload Both endocrine/metabolic	5372	248	0.566855	0.560435	0.311799	AA
442.1	ACE2	Aortic anEAysm Both circulatory system	5348	527	-2.08291	2.0609	0.312171	EA
455	TMPRSS2	Hemorrhoids	4547	150	1.09688	1.08559	0.312304	EA
345.3	ACE2	Convulsions Both neurological	6900	239	-1.46995	1.45568	0.312591	AA
275	ACE2	Disorders of mineral metabolism endocrine/metabolic	6237	287	-4.28828	4.25957	0.31406	EA
327.32	TMPRSS2	Obstructive sleep apnea	6561	1538	0.565694	0.562054	0.314186	AA
740.2	ACE2	Osteoarthrosis, generalized Both musculoskeletal	5723	121	-4.40494	4.3857	0.315192	EA
250.42	ACE2	Other abnormal glucose Both endocrine/metabolic	5305	1072	0.3908	0.389797	0.316066	AA
369.5	ACE2	Conjunctivitis, infectious Both sense organs	6879	136	-2.47254	2.46683	0.316191	AA
508	ACE2	Pulmonary collapse; interstitial and compensatory emphysema respiratory	6575	86	0.994564	0.992694	0.3164	AA
740	LY6E	Osteoarthrosis	6094	492	1.12945	1.12791	0.31665	EA
496	ACE2	Chronic airway obstruction respiratory	5858	726	0.867236	0.866263	0.316767	EA
426.3	TMPRSS2	Bundle branch block	4314	152	1.15561	1.15447	0.316829	AA
401.22	ACE2	Hypertensive chronic kidney disease Both circulatory system	3747	1093	0.423407	0.423284	0.31717	AA
41	TMPRSS2	Bacterial infection NOS	6895	428	0.759343	0.759989	0.317722	AA
591	LY6E	Urinary tract infection	5944	354	1.12225	1.12343	0.31782	EA
599.5	TMPRSS2	Frequency of urination and polyuria	5855	787	0.662061	0.663274	0.318196	AA
380.4	ACE2	Impacted cerumen Both sense organs	7630	264	0.719357	0.721017	0.318426	AA
242	ACE2	Thyrotoxicosis with or without goiter endocrine/metabolic	5322	89	1.58368	1.58781	0.318572	EA
627.1	ACE2	Postmenopausal bleeding Female genitourinary	6099	199	-1.61385	1.62113	0.31949	AA
401.1	TMPRSS2	Essential hypertension	7459	4805	-0.517975	0.520799	0.319942	AA
165	ACE2	Cancer within the respiratory system neoplasms	6808	106	1.7051	1.71696	0.320663	EA
241.1	ACE2	Nontoxic uninodular goiter Both endocrine/metabolic	6837	340	-1.29044	1.30349	0.322181	AA
442.11	TMPRSS2	Abdominal aortic anEAysm	4978	157	1.08508	1.09624	0.322262	EA
938.1	ACE2	Acute dermatitis due to solar radiation Both dermatologic	5803	4	4.53409	4.58376	0.322583	EA
433.31	ACE2	Transient cerebral ischemia Both circulatory system	7350	534	0.518948	0.525138	0.323049	AA
621	ACE2	Endometrial hyperplasia Female genitourinary	7776	39	-9.33611	9.45058	0.323208	AA
627.5	ACE2	Premature menopause and other ovarian failure Female genitourinary	6404	6	4.75321	4.81262	0.323321	EA
134	ACE2	Helminthiases infectious diseases	7295	3	2.52147	2.55433	0.323575	AA
427.9	ACE2	Palpitations Both circulatory system	4899	737	-0.580722	0.589056	0.324205	AA
798.1	ACE2	Chronic fatigue syndrome symptoms	5379	45	1.25036	1.27083	0.325169	AA
428.2	TMPRSS2	Heart failure NOS	6030	124	1.02873	1.04567	0.325216	AA
790.6	ACE2	Other abnormal blood chemistry Both symptoms	7252	482	0.524646	0.533373	0.325294	AA
452	ACE2	Other venous embolism and thrombosis circulatory system	5741	575	0.504186	0.512625	0.325342	AA
530	TMPRSS2	Diseases of esophagus	5626	1285	-1.03943	1.05744	0.325624	EA
378	ACE2	Strabismus and other disorders of binocular eye movements sense organs	6635	48	-6.35575	6.46807	0.325787	AA
599.4	ACE2	Urinary incontinence Both genitourinary	5570	502	-0.75341	0.767209	0.326093	AA
588.2	ACE2	Secondary hyperparathyroidism (of renal origin) Both genitourinary	5214	322	-0.906157	0.923279	0.326368	AA
1010	ACE2	Other tests Both NULL	6405	1775	0.583066	0.594346	0.326583	EA
306.1	ACE2	Mental disorders durring/after pregnancy Female mental disorders	3440	125	-1.81923	1.85479	0.326676	AA
472	TMPRSS2	Chronic pharyngitis and nasopharyngitis	5147	308	1.08269	1.10458	0.326994	AA
619.4	ACE2	Noninflammatory disorders of vagina Female genitourinary	6747	23	3.4246	3.50386	0.328382	EA
595	ACE2	Hydronephrosis genitourinary	6473	39	1.92401	1.96969	0.328663	EA
401.21	ACE2	Hypertensive heart disease Both circulatory system	2134	179	0.874528	0.895663	0.328864	EA
338.1	ACE2		6458	172	-1.81425	1.86234	0.329968	AA
414	TMPRSS2	Other forms of chronic heart disease	6374	334	0.764226	0.78462	0.330053	AA
1011	ACE2	Complications of surgical and medical procedures Both NULL	6799	52	-10.6626	10.9623	0.330725	EA
401.3	ACE2	Other hypertensive complications Both circulatory system	2067	112	-2.66755	2.74364	0.330917	EA
585.2	ACE2	Renal failure NOS Both genitourinary	5047	155	-1.48654	1.52903	0.330943	AA
333.4	ACE2	Torsion dystonia Both neurological	6683	22	1.39548	1.43616	0.331211	AA
420	ACE2	Carditis circulatory system	5031	200	1.00918	1.04013	0.331924	EA
429.2	ACE2	Abnormal function study of cardiovascular system Both circulatory system	6061	155	-1.73214	1.78595	0.332112	AA
281.11	ACE2	Pernicious anemia Both hematopoietic	4090	23	1.40062	1.44452	0.332241	AA
512.7	ACE2	Shortness of breath Both respiratory	5383	1927	-0.340481	0.351635	0.332904	AA
250.3	ACE2	Insulin pump user Both endocrine/metabolic	4928	695	0.438495	0.453166	0.333232	AA
112	ACE2	Candidiasis Both infectious diseases	6561	557	-0.837455	0.865642	0.333325	AA
772	ACE2	Symptoms of the muscles symptoms	6465	14	2.40067	2.48222	0.333472	EA
285	ACE2	Other anemias hematopoietic	6247	2180	-0.336072	0.347531	0.333531	AA
590	ACE2	Pyelonephritis genitourinary	5516	152	-1.81643	1.88039	0.334051	AA
38	ACE2	Septicemia infectious diseases	6054	238	-2.39563	2.48007	0.334068	EA
450	ACE2	Noninfectious disorders of lymphatic channels Both circulatory system	8085	111	-2.87775	2.98366	0.334794	AA
8.5	ACE2	Bacterial enteritis Both infectious diseases	6646	47	1.88047	1.95157	0.335261	EA
227.3	ACE2	Benign neoplasm of pituitary gland and craniopharyngeal duct (pouch) Both neoplasms	7911	54	1.13522	1.18031	0.336149	AA
550	LY6E	Abdominal hernia	6393	328	1.04986	1.09256	0.336595	EA
427.5	ACE2	Arrhythmia (cardiac) NOS Both circulatory system	2046	118	-2.44885	2.55017	0.336918	EA
198.2	ACE2	Secondary malignancy of respiratory organs Both neoplasms	7148	63	-5.09279	5.31318	0.3378	AA
571	ACE2	Chronic liver disease and cirrhosis Both digestive	5984	225	-5.36253	5.60161	0.338406	EA
250.3	TMPRSS2	Insulin pump user	4928	695	-1.00092	1.0468	0.338986	AA
496.3	ACE2	Bronchiectasis Both respiratory	5595	49	-6.58356	6.89931	0.339965	AA
394.7	ACE2	Disease of tricuspid valve Both circulatory system	6759	140	0.797243	0.836989	0.340837	AA
686.1	ACE2	Carbuncle and furuncle Both dermatologic	6491	115	-2.4249	2.54642	0.340956	AA
433.3	ACE2	Cerebral ischemia Both circulatory system	5711	397	-1.61108	1.69325	0.341363	EA
395.1	ACE2	Nonrheumatic mitral valve disorders Both circulatory system	5007	1037	0.832513	0.875126	0.341449	EA
500.2	ACE2	Pneumoconiosis Both respiratory	5114	19	2.03871	2.14398	0.341655	EA
198.2	ACE2	Secondary malignancy of respiratory organs Both neoplasms	6210	42	1.94022	2.04056	0.341691	EA
443.9	ACE2	Peripheral vascular disease, unspecified Both circulatory system	5333	512	-2.00102	2.10451	0.341692	EA
571.81	ACE2	Portal hypertension Both digestive	6527	43	1.04197	1.09616	0.341824	AA
375.1	TMPRSS2	Dry eyes	6777	190	0.9968	1.04884	0.341917	AA
382	TMPRSS2	Otalgia	7376	181	0.988925	1.04216	0.342661	AA
288.11	ACE2	Neutropenia Both hematopoietic	6438	89	-3.05398	3.22229	0.343249	AA
386.9	ACE2	Dizziness and giddiness (Light-headedness and vertigo) Both sense organs	6033	734	-1.652	1.75388	0.346237	EA
429	ACE2	Ill-defined descriptions and complications of heart disease circulatory system	6061	155	-1.58912	1.68823	0.346556	AA
550	ACE2	Abdominal hernia digestive	6393	328	-3.06314	3.25586	0.346803	EA
420	ACE2	Carditis circulatory system	6903	109	0.808329	0.859199	0.346811	AA
690.1	ACE2	Seborrheic dermatitis Both dermatologic	6469	116	-2.66455	2.83261	0.346874	AA
452	LY6E	Other venous embolism and thrombosis	4794	397	1.03921	1.10477	0.346881	EA
335	ACE2	Multiple sclerosis neurological	6734	73	-3.941	4.1908	0.347016	AA
530.1	TMPRSS2	Esophagitis, GERD and related diseases	5540	1199	-0.994357	1.05784	0.347222	EA
428.3	LY6E	Heart failure with reduced EF [Systolic or combined heart failure]	4132	890	0.869996	0.927165	0.34807	EA
720	ACE2	Spinal stenosis musculoskeletal	6654	276	-1.09519	1.16726	0.348109	AA
225.1	ACE2	Benign neoplasm of brain, cranial nerves, meninges Both neoplasms	8090	47	1.23841	1.32006	0.34817	AA
623	ACE2	Hypertrophy of female genital organs Female genitourinary	7774	37	-8.46052	9.0288	0.348729	AA
480.3	ACE2	Pneumonia due to fungus (mycoses) Both respiratory	5736	11	2.14587	2.29087	0.34891	EA
411.1	ACE2	Unstable angina (intermediate coronary syndrome) Both circulatory system	3205	215	0.971367	1.03788	0.349315	EA
197	ACE2	Chemotherapy neoplasms	7325	240	-1.47801	1.57978	0.34949	AA
729	ACE2	Other disorders of soft tissues musculoskeletal	5898	71	-6.10017	6.5206	0.349519	EA
327.3	ACE2	Sleep apnea Both neurological	6286	1263	0.35189	0.376603	0.350108	AA
250.2	ACE2	Type 2	5777	1479	0.58944	0.630865	0.350131	EA
300.3	ACE2	Obsessive-compulsive disorders Both mental disorders	4294	13	2.88802	3.09154	0.350216	EA
715.1	ACE2	Sacroiliitis NEC Both musculoskeletal	6172	13	2.83975	3.04379	0.350838	EA
195	TMPRSS2	Cancer, suspected or other	7225	140	0.966141	1.03675	0.351392	AA
389	ACE2	Hearing loss sense organs	7615	415	-0.928952	0.999315	0.352584	AA
374	ACE2	Other disorders of eyelids sense organs	6851	108	-2.55694	2.75079	0.352615	AA
704.1	ACE2	Alopecia Both dermatologic	7310	175	-1.78333	1.91896	0.352722	AA
735.3	ACE2	Hallux valgus (Bunion) Both musculoskeletal	7289	132	0.851655	0.916664	0.352847	AA
443	ACE2	Peripheral vascular disease circulatory system	5264	443	-2.16998	2.33563	0.35285	EA
288.1	TMPRSS2	Decreased white blood cell count	6492	143	0.960438	1.03398	0.352955	AA
365.1	ACE2	Open-angle glaucoma Both sense organs	6322	65	-7.09988	7.65186	0.353478	EA
565	ACE2	Anal and rectal conditions digestive	6411	64	-7.3127	7.88137	0.353487	EA
580	ACE2	Nephritis; nephrosis; renal sclerosis genitourinary	4578	58	-7.92208	8.54836	0.354064	EA
617	ACE2	Disorders secondary to childbirth, surgery, trauma Female genitourinary	6869	14	3.80336	4.10474	0.354147	EA
527	ACE2	Diseases of the salivary glands digestive	7579	85	-3.53736	3.81866	0.354272	AA
601	ACE2	Inflammatory diseases of prostate Male genitourinary	7079	67	-3.3116	3.57997	0.354947	AA
743.1	TMPRSS2	Osteoporosis	7503	167	0.978349	1.05769	0.354973	AA
214	ACE2	Lipoma neoplasms	7815	102	-2.76279	2.99178	0.355767	AA
599.7	ACE2	Urethral discharge Both genitourinary	5081	13	1.13802	1.23311	0.356067	AA
427.22	LY6E	Atrial flutter	3003	1075	0.94958	1.02921	0.3562	EA
292	ACE2	Neurological disorders Both mental disorders	6968	334	0.581719	0.63069	0.356344	AA
565	TMPRSS2	Anal and rectal conditions	7058	201	0.958051	1.04025	0.357059	AA
465.2	ACE2	Acute pharyngitis Both respiratory	5654	249	-1.20068	1.3045	0.357358	AA
216.1	ACE2	Screening for malignant neoplasms of the skin Both neoplasms	7080	3307	-0.282653	0.307789	0.358445	AA
303.3	ACE2	Psychogenic disorder Both mental disorders	3355	40	-5.62964	6.13154	0.358543	AA
457.2	ACE2	Encounter for long-term (current) use of antiplatelets/antithrombotics Both circulatory system	4501	104	-3.79162	4.13035	0.358624	EA
850	ACE2	Hemorrhage or hematoma complicating a procedure Both injuries & poisonings	6746	92	-2.76854	3.01594	0.358636	AA
244	ACE2	Hypothyroidism Both endocrine/metabolic	6889	392	0.642211	0.700415	0.359195	AA
624	ACE2	Symptoms involving female genital tract Female genitourinary	6977	170	-1.66834	1.82567	0.360811	AA
646	ACE2	Other complications of pregnancy NEC Female pregnancy complications	6886	19	-14.1184	15.4501	0.360819	EA
427.4	ACE2	Cardiac arrest and ventricular fibrillation Both circulatory system	2044	116	-2.09287	2.29036	0.360836	EA
563	ACE2	Constipation Both digestive	7508	527	0.506393	0.554479	0.361096	AA
280.1	TMPRSS2	Iron deficiency anemias, unspecified or not due to blood loss	4956	889	-0.958836	1.05063	0.361438	AA
270.32	ACE2	Paraproteinemia Both endocrine/metabolic	7264	93	-2.68648	2.94424	0.361531	AA
722.9	ACE2	Other and unspecified disc disorder Both musculoskeletal	6447	69	-3.52167	3.86034	0.361627	AA
510.2	ACE2	Lung transplant Both respiratory	7692	33	1.16925	1.28176	0.361651	AA
830	ACE2	Dislocation injuries & poisonings	7792	140	-2.08337	2.28424	0.361736	AA
726	ACE2	Peripheral enthesopathies and allied syndromes musculoskeletal	6071	244	-2.23686	2.45539	0.362296	EA
385.3	ACE2	Cholesteatoma Both sense organs	7198	3	2.83407	3.11292	0.362601	AA
389.1	ACE2	SensorinEAal hearing loss Both sense organs	6463	213	-2.57256	2.82682	0.362794	EA
496.21	ACE2	Obstructive chronic bronchitis Both respiratory	5746	200	0.667526	0.73432	0.363329	AA
946	ACE2	Anaphylactic shock NOS Both injuries & poisonings	5940	68	0.987828	1.08747	0.36368	AA
706.2	ACE2	Sebaceous cyst Both dermatologic	6786	178	-1.51417	1.67785	0.366819	AA
385	ACE2	Other disorders of middle ear and mastoid sense organs	7197	2	2.82482	3.14006	0.368329	AA
532	LY6E	Dysphagia	4608	267	0.991964	1.10297	0.368461	EA
318	TMPRSS2	Tobacco use disorder	6974	2127	-0.511972	0.570591	0.369577	AA
285.1	ACE2	Acute posthemorrhagic anemia Both hematopoietic	4398	105	-3.55024	3.95887	0.369836	EA
276.14	TMPRSS2	Hypopotassemia	4780	231	0.954029	1.06386	0.369847	EA
367.4	ACE2	Presbyopia Both sense organs	6820	45	-10.422	11.6285	0.370123	EA
599.2	ACE2	Retention of urine genitourinary	5658	163	-2.68607	2.9988	0.370404	EA
792	ACE2	Abnormal Papanicolaou smear of cervix and cervical HPV Female genitourinary	6232	464	0.588089	0.656668	0.370485	AA
795	ACE2	Other and nonspecific abnormal cytological, histological and immunological findings symptoms	8081	48	-6.09843	6.81669	0.370984	AA
457.3	ACE2	Encounter for long-term (current) use of aspirin Both circulatory system	5721	555	0.470147	0.525861	0.371294	AA
411.3	ACE2	Angina pectoris Both circulatory system	3359	369	-1.71801	1.92288	0.371611	EA
578.9	TMPRSS2	Hemorrhage of gastrointestinal tract	6719	177	0.944587	1.05729	0.371642	AA
480	TMPRSS2	Pneumonia	6825	516	0.684247	0.766471	0.372005	AA
790	ACE2	Nonspecific findings on examination of blood Both symptoms	6929	159	-1.65049	1.85012	0.372341	AA
427.9	TMPRSS2	Palpitations	4899	737	-0.932061	1.04594	0.372861	AA
755.1	ACE2	Congenital deformities of feet Both congenital anomalies	7961	21	1.55767	1.75185	0.37392	AA
275.5	TMPRSS2	Disorders of calcium/phosphorus metabolism	6822	166	0.923204	1.0384	0.373967	AA
263	ACE2	Other nutritional deficiency endocrine/metabolic	5536	64	-3.08297	3.4691	0.374166	AA
286.9	TMPRSS2	Abnormal coagulation profile	6451	138	0.920165	1.03554	0.374226	AA
415	TMPRSS2	Pulmonary heart disease	7327	671	0.563564	0.634742	0.374614	AA
195	ACE2	Cancer, suspected or other neoplasms	6265	97	-4.03334	4.54293	0.374633	EA
625.1	ACE2	Dyspareunia Female genitourinary	6671	7	3.78839	4.27168	0.375154	EA
626.12	ACE2	Excessive or frequent menstruation Female genitourinary	6255	355	-0.960164	1.08289	0.375256	AA
613.5	ACE2	Mastodynia Both genitourinary	7618	185	-1.61988	1.82781	0.375489	AA
426.21	ACE2	First degree AV block Both circulatory system	4241	79	0.763338	0.861798	0.375752	AA
327.32	LY6E	Obstructive sleep apnea	5830	992	0.74808	0.848207	0.377801	EA
260.6	ACE2	Anorexia Both endocrine/metabolic	5580	108	-1.82729	2.07386	0.378259	AA
244.1	ACE2	Secondary hypothyroidism endocrine/metabolic	6656	159	-1.81658	2.06199	0.378325	AA
153	ACE2	Colorectal cancer Both neoplasms	6355	92	-2.32915	2.64433	0.37842	AA
158	ACE2	Neoplasm of unspecified nature of digestive system Both neoplasms	7520	47	-5.38907	6.1296	0.379299	AA
250.22	TMPRSS2	Type 2 diabetes with renal manifestations	4917	684	-0.929267	1.05716	0.379388	AA
377.3	ACE2	Optic neuritis/neuropathy sense organs	6632	45	-4.92743	5.61091	0.379842	AA
577.2	ACE2	Chronic pancreatitis Both digestive	7896	42	-7.11234	8.09903	0.379851	AA
426.21	ACE2	First degree AV block Both circulatory system	2032	104	-2.1986	2.50653	0.380406	EA
509	ACE2	Respiratory failure, insufficiency, arrest Both respiratory	6678	189	0.684461	0.781287	0.380992	AA
348.7	TMPRSS2	Coma	6855	194	0.91248	1.04269	0.381508	AA
579	ACE2	Other symptoms involving abdomen and pelvis digestive	6691	149	0.767923	0.878677	0.382144	AA
189.1	ACE2	Cancer of kidney and renal pelvis Both neoplasms	8022	119	0.782309	0.895466	0.382318	AA
327.4	LY6E	Insomnia	5121	283	0.961774	1.10168	0.382661	EA
198	TMPRSS2	Secondary malignant neoplasm	7247	162	0.905728	1.03835	0.383058	AA
585	ACE2	Renal failure genitourinary	6345	1453	-0.370079	0.424356	0.383156	AA
182	ACE2	Malignant neoplasm of uterus Female neoplasms	6207	77	-2.80254	3.21413	0.383239	AA
942	ACE2	Infusion and transfusion reaction Both injuries & poisonings	5875	3	1.83828	2.10855	0.383307	AA
426.24	ACE2	Atrioventricular block, complete Both circulatory system	2196	268	-1.2234	1.4044	0.383688	EA
874	ACE2	Complication of amputation stump Both injuries & poisonings	6502	5	3.01383	3.46493	0.384404	EA
615	TMPRSS2	Endometriosis	6869	124	0.91775	1.05689	0.385204	AA
415.21	TMPRSS2	Primary pulmonary hypertension	6810	154	0.901593	1.03945	0.385736	AA
989	TMPRSS2	Toxic effect of other substances, chiefly nonmedicinal as to source	8023	172	0.893621	1.03243	0.386737	AA
277.51	ACE2	Lipoprotein disorders Both endocrine/metabolic	7577	59	-4.23856	4.89778	0.386817	AA
275.5	ACE2	Disorders of calcium/phosphorus metabolism endocrine/metabolic	6822	166	-1.49783	1.73349	0.387558	AA
939	ACE2	Atopic/contact dermatitis due to other or unspecified dermatologic	6048	249	-3.57412	4.14138	0.388123	EA
698	ACE2	Pruritus and related conditions dermatologic	6735	73	1.79025	2.07562	0.388406	EA
741.4	TMPRSS2	Joint effusions	6954	247	0.904153	1.0483	0.388418	AA
284.1	ACE2	Pancytopenia Both hematopoietic	4343	50	-6.9231	8.03086	0.388653	EA
415.11	ACE2	Pulmonary embolism and infarction, acute Both circulatory system	5477	136	-3.02616	3.51127	0.388774	EA
333	ACE2	Extrapyramidal disease and abnormal movement disorders Both neurological	6704	43	1.06665	1.24006	0.389701	AA
853	ACE2	Complication of colostomy or enterostomy Both injuries & poisonings	5278	5	2.4239	2.82208	0.390391	EA
401	TMPRSS2	Hypertension	6618	3964	-0.463285	0.539531	0.390517	AA
681.5	ACE2	Cellulitis and abscess of leg, except foot Both dermatologic	6546	170	-1.47034	1.71289	0.390675	AA
510	ACE2	Other diseases of lung respiratory	7919	260	0.626989	0.730874	0.390969	AA
276.14	ACE2	Hypopotassemia Both endocrine/metabolic	4780	231	-3.36406	3.92588	0.391503	EA
626.4	ACE2	Premenstrual tension syndromes Female genitourinary	5904	4	2.66502	3.11428	0.392142	AA
707.2	TMPRSS2	Chronic ulcer of leg or foot	7892	181	0.887183	1.03726	0.392379	AA
743	ACE2	Osteoporosis, osteopenia and pathological fracture musculoskeletal	6502	446	-2.39592	2.80248	0.392591	EA
411.1	TMPRSS2	Unstable angina (intermediate coronary syndrome)	6175	135	0.914977	1.07033	0.392631	AA
282.9	ACE2	Other hereditary hemolytic anemias Both hematopoietic	4106	39	-4.97797	5.83019	0.393201	AA
292.4	TMPRSS2	Altered mental status	6819	185	0.888032	1.04081	0.393544	AA
458.9	ACE2	Hypotension NOS Both circulatory system	6086	247	-1.04606	1.22623	0.393621	AA
550.4	ACE2	Umbilical hernia Both digestive	6113	48	-7.8109	9.18149	0.394924	EA
913	ACE2	Toxic effect of venom Both injuries & poisonings	6839	4	2.77973	3.26994	0.395277	EA
278.11	LY6E	Morbid obesity	5429	414	0.926446	1.08993	0.395324	EA
772	ACE2	Symptoms of the muscles symptoms	6970	30	1.38307	1.62724	0.395352	AA
302.1	ACE2	Decreased libido mental disorders	3344	29	0.959474	1.1291	0.395455	AA
180.1	ACE2	Cervical cancer Female neoplasms	5805	37	-6.47581	7.62425	0.395675	AA
395	ACE2	Heart valve disorders Both circulatory system	7176	557	0.478272	0.563566	0.396074	AA
741	ACE2	Symptoms and disorders of the joints musculoskeletal	6970	263	-1.06397	1.25374	0.396085	AA
611.3	ACE2	Lump or mass in breast Both genitourinary	7003	329	0.638814	0.754308	0.397058	AA
395.2	ACE2	Nonrheumatic aortic valve disorders Both circulatory system	5296	1326	-1.29183	1.52621	0.397314	EA
790.6	ACE2	Other abnormal blood chemistry Both symptoms	6503	239	1.03689	1.22555	0.39752	EA
379	ACE2	Other disorders of eye Both sense organs	6760	173	-1.42748	1.69076	0.398513	AA
994.1	ACE2	Systemic inflammatory response syndrome (SIRS) Both injuries & poisonings	7355	32	1.31659	1.56078	0.398921	AA
694	ACE2	Dyschromia and Vitiligo dermatologic	6057	65	-5.57461	6.61086	0.399089	EA
208	LY6E	Benign neoplasm of colon	6467	440	0.927961	1.10052	0.399114	EA
253.7	ACE2	Other disorders of nEAohypophysis Both endocrine/metabolic	6315	5	2.9217	3.46893	0.399649	EA
327.3	LY6E	Sleep apnea	5852	1014	0.714537	0.849714	0.400396	EA
537.1	ACE2	Lesions of stomach and duodenum Both digestive	6271	9	2.69082	3.20071	0.40052	EA
930	ACE2	Allergic reaction to food injuries & poisonings	6063	191	0.623904	0.743789	0.401572	AA
654.1	ACE2	Abnormality of organs and soft tissues of pelvis complicating pregnancy, childbirth, or the puerperi Female pregnancy complications	7748	165	-1.46559	1.74889	0.402025	AA
153.2	ACE2	Colon cancer Both neoplasms	6374	111	-1.83614	2.19118	0.402048	AA
249	ACE2	Secondary diabetes mellitus endocrine/metabolic	4530	232	-2.8359	3.3894	0.402763	EA
117.4	ACE2	Aspergillosis Both infectious diseases	6217	29	1.83808	2.19757	0.402922	EA
458.1	ACE2	Orthostatic hypotension Both circulatory system	5911	72	-2.67306	3.19595	0.402935	AA
278.1	TMPRSS2	Obesity	6161	1146	-0.880996	1.05334	0.402941	EA
430.3	ACE2	Subdural hemorrhage Both circulatory system	5339	25	2.03936	2.43893	0.403059	EA
359.2	ACE2	Myopathy Both neurological	7419	46	1.11369	1.33274	0.403358	AA
351	ACE2	Other peripheral nerve disorders neurological	7323	727	-0.574179	0.68844	0.404265	AA
297	ACE2	Suicidal ideation or attempt mental disorders	3361	46	0.832229	0.997978	0.404329	AA
626.14	ACE2	Irregular menstrual bleeding Female genitourinary	5958	58	-3.6962	4.43598	0.404714	AA
458.1	ACE2	Orthostatic hypotension Both circulatory system	5308	66	-4.89487	5.87627	0.404851	EA
771	ACE2	Musculoskeletal symptoms referable to limbs Both symptoms	6270	85	-4.52879	5.4411	0.405223	EA
327.3	TMPRSS2	Sleep apnea	6286	1263	0.504351	0.60649	0.40564	AA
395.1	ACE2	Nonrheumatic mitral valve disorders Both circulatory system	7040	421	0.520705	0.626182	0.405661	AA
483	ACE2	Acute bronchitis and bronchiolitis respiratory	5882	157	1.32499	1.59439	0.405955	EA
71.1	ACE2	HIV infection, symptomatic Both infectious diseases	5920	20	1.77156	2.13704	0.407116	EA
255.3	ACE2	Adrenogenital disorders Both endocrine/metabolic	6849	2	3.19802	3.86158	0.407577	AA
216.1	TMPRSS2	Screening for malignant neoplasms of the skin	7080	3307	0.418224	0.505177	0.407741	AA
513.3	ACE2	Hypoventilation Both respiratory	7741	69	-3.35837	4.06468	0.408672	AA
619.2	ACE2	Disorders of uterus, NEC Female genitourinary	6743	30	-7.26904	8.80024	0.408801	AA
457.3	LY6E	Encounter for long-term (current) use of aspirin	4811	414	0.910663	1.10456	0.409678	EA
80	ACE2	Postoperative infection infectious diseases	7765	120	-2.0401	2.47536	0.409847	AA
411.4	ACE2	Coronary atherosclerosis Both circulatory system	5871	2881	-0.634263	0.771819	0.411204	EA
709	ACE2	Diffuse diseases of connective tissue dermatologic	6396	113	-2.15434	2.62434	0.411699	AA
772.1	ACE2	Muscular wasting and disuse atrophy Both symptoms	6493	42	-8.70873	10.6373	0.412959	EA
241	ACE2	Nontoxic nodular goiter Both endocrine/metabolic	5360	127	-2.95319	3.60862	0.413145	EA
605	ACE2	Erectile dysfunction [ED] Male genitourinary	7366	700	-0.489111	0.598094	0.413482	AA
276	ACE2	Disorders of fluid, electrolyte, and acid-base balance Both endocrine/metabolic	6257	1133	-0.37215	0.455633	0.414056	AA
362.27	ACE2	Drusen (degenerative) of retina Both sense organs	6531	48	-3.93967	4.82469	0.414178	AA
495.2	ACE2	Asthma with exacerbation Both respiratory	5896	350	-0.861546	1.0555	0.414361	AA
300.1	ACE2	Anxiety disorder Both mental disorders	4950	669	0.700158	0.858189	0.414583	EA
260.1	ACE2	Cachexia Both endocrine/metabolic	5591	18	2.03992	2.50112	0.414727	EA
840.3	TMPRSS2	Joint/ligament sprain	6365	161	0.848978	1.04199	0.415207	AA
10	ACE2	Tuberculosis infectious diseases	6510	43	-4.32101	5.30579	0.415418	AA
705.8	ACE2	Hyperhidrosis Both dermatologic	6744	136	-1.56095	1.91683	0.415449	AA
574	TMPRSS2	Cholelithiasis and cholecystitis	7727	193	0.845234	1.03848	0.415692	AA
270.3	ACE2	Disorders of plasma protein metabolism Both endocrine/metabolic	6558	48	1.6079	1.979	0.416515	EA
596	ACE2	Other disorders of bladder genitourinary	6558	92	-4.13169	5.10062	0.417919	EA
426.24	ACE2	Atrioventricular block, complete Both circulatory system	4250	88	-1.69268	2.09045	0.4181	AA
228	ACE2	Hemangioma and lymphangioma, any site Both neoplasms	6807	41	-8.95368	11.0579	0.418107	EA
512.1	ACE2	Wheezing Both respiratory	3664	208	-0.804823	0.996081	0.419096	AA
198.4	ACE2	Secondary malignant neoplasm of liver Both neoplasms	7134	49	-4.71623	5.84122	0.419434	AA
512.8	LY6E	Cough	3993	578	0.995111	1.23311	0.419669	EA
251	ACE2	Other disorders of pancreatic internal secretion Both endocrine/metabolic	6868	21	1.14425	1.41929	0.420119	AA
702	ACE2	Degenerative skin conditions and other dermatoses dermatologic	6338	338	-2.24182	2.78267	0.420453	EA
426.91	ACE2	Cardiac pacemaker in situ Both circulatory system	2525	597	-0.751429	0.933654	0.42092	EA
736.5	ACE2	Acquired deformities of knee Both musculoskeletal	7168	11	1.40924	1.75198	0.421185	AA
721.1	TMPRSS2	Spondylosis without myelopathy	6898	520	0.614773	0.767634	0.423209	AA
704.2	ACE2	Hirsutism Both dermatologic	7186	51	1.19553	1.49375	0.423507	AA
514.2	ACE2	Solitary pulmonary nodule Both respiratory	6360	231	-3.33779	4.17095	0.423568	EA
580.32	ACE2	Nephritis and nephropathy with pathological lesion Both genitourinary	4946	54	-2.9579	3.69675	0.423633	AA
687.4	ACE2	Disturbance of skin sensation Both dermatologic	6159	218	-1.99953	2.49971	0.423767	EA
841	TMPRSS2	Sprains and strains of back and neck	6386	182	0.83225	1.04051	0.423797	AA
550.1	ACE2	Inguinal hernia Both digestive	7092	159	-1.41412	1.76848	0.423928	AA
362.23	ACE2	Cystoid macular degeneration of retina Both sense organs	6531	48	-3.8476	4.81214	0.423965	AA
536.3	ACE2	Gastroparesis Both digestive	6319	57	-5.97268	7.47047	0.423997	EA
647.1	ACE2	Infections of genitourinary tract during pregnancy Female pregnancy complications	7865	117	-2.03329	2.54334	0.424026	AA
296.22	TMPRSS2	Major depressive disorder	4401	1086	0.749222	0.937569	0.424226	AA
351	TMPRSS2	Other peripheral nerve disorders	7323	727	0.510891	0.640036	0.424741	AA
411.8	LY6E	Other chronic ischemic heart disease, unspecified	3696	706	0.993113	1.24421	0.424761	EA
871	ACE2	Open wounds of extremities Both injuries & poisonings	7316	170	-1.41047	1.76711	0.424768	AA
722.7	ACE2	Intervertebral disc disorder with myelopathy Both musculoskeletal	6413	35	-5.40113	6.79114	0.426427	AA
729.3	ACE2	Panniculitis Both musculoskeletal	5397	17	1.46729	1.84522	0.426504	AA
227.1	ACE2	Benign neoplasm of adrenal gland Both neoplasms	6750	20	2.29816	2.89038	0.42655	EA
41.1	ACE2	Staphylococcus infections Both infectious diseases	5876	60	-5.26279	6.62605	0.427046	EA
136	ACE2	Other infectious and parasitic diseases infectious diseases	7465	173	-1.3428	1.69111	0.427174	AA
368.2	ACE2	Diplopia and disorders of binocular vision Both sense organs	6492	39	-8.61144	10.8761	0.428491	EA
705	ACE2	Disorders of sweat glands Both dermatologic	6665	57	-3.6075	4.56112	0.428989	AA
707	ACE2	Chronic ulcer of skin dermatologic	7847	136	-1.72826	2.18631	0.42924	AA
270	ACE2	Disorders of protein plasma/amino-acid transport and metabolism endocrine/metabolic	7242	71	-2.74265	3.47094	0.429426	AA
316	ACE2	Substance addiction and disorders mental disorders	5301	100	1.46087	1.84956	0.429618	EA
71	ACE2	Human immunodeficiency virus [HIV] disease infectious diseases	5921	21	1.70114	2.15417	0.429705	EA
427.7	ACE2	Tachycardia NOS Both circulatory system	2053	125	-1.78156	2.25646	0.429797	EA
720.1	ACE2	Spinal stenosis of lumbar region Both musculoskeletal	6670	292	-0.823978	1.0437	0.429833	AA
381.1	ACE2	Otitis media Both sense organs	7322	127	-1.85091	2.34641	0.430212	AA
415.11	ACE2	Pulmonary embolism and infarction, acute Both circulatory system	6932	276	0.542112	0.687782	0.430578	AA
586.2	ACE2	Cyst of kidney, acquired Both genitourinary	4983	91	-1.73225	2.20021	0.4311	AA
740.1	ACE2	Osteoarthritis; localized Both musculoskeletal	6067	551	-0.692784	0.880607	0.43145	AA
727.6	ACE2	Rupture of tendon, nontraumatic Both musculoskeletal	5884	57	-5.55911	7.07519	0.432033	EA
381.11	ACE2	Suppurative and unspecified otitis media Both sense organs	6575	36	1.85236	2.35849	0.432219	EA
303	ACE2	Psychogenic and somatoform disorders Both mental disorders	3347	32	-4.50079	5.73965	0.432947	AA
800.3	ACE2	Fracture of tibia and fibula Both injuries & poisonings	7286	52	-3.99621	5.0975	0.433067	AA
857	ACE2	Mechanical complication of unspecified genitourinary device, implant, and graft Both injuries & poisonings	6707	53	-3.30442	4.21966	0.433568	AA
495	TMPRSS2	Asthma	6979	1433	-0.598149	0.763826	0.433571	AA
272.13	LY6E	Mixed hyperlipidemia	3410	1311	0.734118	0.937556	0.43362	EA
840.3	ACE2	Joint/ligament sprain Both injuries & poisonings	6440	40	-8.24578	10.5446	0.434221	EA
594.1	ACE2	Calculus of kidney Both genitourinary	7871	202	-1.27876	1.63535	0.434245	AA
447.7	ACE2	Aortic ectasia Both circulatory system	6702	51	-3.47891	4.45234	0.434587	AA
292.4	ACE2	Altered mental status Both mental disorders	6021	80	-4.0153	5.13969	0.434666	EA
514	ACE2	Abnormal findings examination of lungs respiratory	7364	295	0.542236	0.694665	0.435054	AA
949	ACE2	Allergies, other Both injuries & poisonings	6208	336	-0.766557	0.982125	0.435092	AA
442.1	ACE2	Aortic aneurysm Both circulatory system	6831	180	-1.22002	1.56328	0.435143	AA
858	ACE2	Complication of internal orthopedic device Both injuries & poisonings	5326	53	-5.69431	7.30674	0.435789	EA
512.7	TMPRSS2	Shortness of breath	4905	1490	-0.612474	0.786234	0.435981	EA
346.1	ACE2	Nonspecific abnormal findings on radiological and other examination of skull and head Both neurological	6696	35	-5.80991	7.46737	0.436546	AA
870.1	ACE2	Open wound or laceration of eye or eyelid Both injuries & poisonings	7156	10	1.32392	1.70178	0.436592	AA
447	ACE2	Other disorders of arteries and arterioles circulatory system	5177	356	0.746095	0.959673	0.436895	EA
250.1	ACE2	Type 1 Diabetes	4449	216	-0.884243	1.13822	0.43724	AA
477	ACE2	Epistaxis or throat hemorrhage Both respiratory	4992	153	0.606704	0.782788	0.438307	AA
261.1	ACE2	Vitamin A deficiency Both endocrine/metabolic	5475	3	1.95864	2.5275	0.438381	AA
250	ACE2	Diabetes mellitus Both endocrine/metabolic	5719	1421	0.50004	0.646292	0.439105	EA
260.3	ACE2	Adult failure to thrive Both endocrine/metabolic	5509	37	-3.71346	4.80028	0.439172	AA
459.9	TMPRSS2	Circulatory disease NEC	6560	721	-0.804739	1.0405	0.439275	AA
132	ACE2	Infestation (lice, mites) infectious diseases	6580	7	2.23017	2.88441	0.439415	EA
789	ACE2	Nausea and vomiting symptoms	6358	318	0.861627	1.11557	0.4399	EA
1002	ACE2	Symptoms concerning nutrition, metabolism, and development Both NULL	7885	310	-0.872289	1.12952	0.439955	AA
610	ACE2	Benign mammary dysplasias Female genitourinary	6540	17	3.29951	4.27311	0.440022	EA
180	ACE2	Cervical cancer and dysplasia Female neoplasms	5891	123	-1.62162	2.10597	0.441293	AA
709.2	ACE2	Sicca syndrome Both dermatologic	5953	43	2.08642	2.71482	0.442172	EA
427.8	ACE2	Sinoatrial node dysfunction (Bradycardia) Both circulatory system	2406	478	-0.777717	1.01245	0.442398	EA
638	ACE2	Other high-risk pregnancy Female pregnancy complications	6896	29	-10.9388	14.2414	0.442428	EA
427.3	TMPRSS2	Other specified cardiac dysrhythmias	2411	483	0.67291	0.8772	0.443015	EA
635.2	ACE2	Antepartum hemorrhage, abruptio placentae, and placenta previa Female pregnancy complications	7513	99	-1.76791	2.30702	0.443488	AA
509.2	ACE2	Respiratory insufficiency Both respiratory	6498	9	1.43609	1.87414	0.443516	AA
131	ACE2	Protozoan infection Both infectious diseases	7419	127	-1.69374	2.21233	0.44392	AA
286.9	ACE2	Abnormal coagulation profile Both hematopoietic	6451	138	0.689423	0.900712	0.444021	AA
530.13	ACE2	Barrett's esophagus Both digestive	4541	31	1.00469	1.31444	0.44466	AA
530.9	ACE2	Heartburn Both digestive	4603	93	-1.74408	2.28202	0.444706	AA
306	ACE2	Other mental disorder Both mental disorders	4719	1404	-0.298172	0.390714	0.445375	AA
279.7	ACE2	Other immunological findings Both endocrine/metabolic	7619	264	-1.01749	1.33392	0.445596	AA
255.21	ACE2	Glucocorticoid deficiency Both endocrine/metabolic	6892	45	0.961486	1.26088	0.44573	AA
253.1	ACE2	Pituitary hyperfunction Both endocrine/metabolic	6878	31	1.03714	1.36133	0.446145	AA
701	TMPRSS2	Other hypertrophic and atrophic conditions of skin	7504	205	0.78622	1.03323	0.446695	AA
724	ACE2	Other and unspecified disorders of back musculoskeletal	6470	92	-1.905	2.50421	0.446824	AA
41.12	ACE2	Methicillin resistant Staphylococcus aureus Both infectious diseases	6513	46	-4.1165	5.41753	0.447345	AA
614.3	ACE2	Pelvic inflammatory disease (PID) Female genitourinary	6782	37	-4.9749	6.54857	0.447439	AA
580	ACE2	Nephritis; nephrosis; renal sclerosis genitourinary	5068	176	0.545683	0.719152	0.44798	AA
627.2	ACE2	Symptomatic menopause Female genitourinary	6509	111	1.82106	2.40141	0.448254	EA
352.1	ACE2	Trigeminal nerve disorders [CN5] Both neurological	6628	32	-5.78665	7.63375	0.44843	AA
740	ACE2	Osteoarthrosis musculoskeletal	6665	1149	0.386377	0.510212	0.448878	AA
674	ACE2	Other complications of the puerperium NEC Female pregnancy complications	6874	9	3.26472	4.31275	0.449055	EA
327.6	ACE2	Circadian rhythm sleep disorder Both neurological	5084	61	0.914537	1.20857	0.449223	AA
41.2	ACE2	Streptococcus infection Both infectious diseases	6533	66	-2.73419	3.61497	0.449438	AA
573.9	ACE2	Abnormal serum enzyme levels Both digestive	6725	241	-0.966381	1.27874	0.449811	AA
362.6	ACE2	Peripheral retinal degenerations Both sense organs	6520	37	-4.88451	6.47113	0.45036	AA
585	TMPRSS2	Renal failure	5774	1254	-0.815552	1.0811	0.450624	EA
610.2	ACE2	Fibroadenosis of breast Female genitourinary	6677	3	2.68102	3.55735	0.451055	AA
614.54	ACE2	Abscess or ulceration of vulva Female genitourinary	6765	20	1.55378	2.06219	0.451173	AA
452	TMPRSS2	Other venous embolism and thrombosis	4794	397	0.81242	1.07844	0.45125	EA
257	ACE2	Testicular dysfunction Male endocrine/metabolic	6928	81	-2.15712	2.86727	0.451856	AA
599.4	ACE2	Urinary incontinence Both genitourinary	5651	156	1.10188	1.46525	0.452047	EA
286.2	LY6E	Encounter for long-term (current) use of anticoagulants	5323	1552	0.693993	0.923875	0.452547	EA
626.1	TMPRSS2	Irregular menstrual cycle/bleeding	6476	576	0.622531	0.828949	0.45266	AA
1009	ACE2	Injury, NOS NULL	6700	132	-2.84218	3.78517	0.45273	EA
202	ACE2	Cancer of other lymphoid, histiocytic tissue neoplasms	6671	85	1.4042	1.87015	0.452744	EA
562	TMPRSS2	Diverticulosis and diverticulitis	5808	219	0.813139	1.08359	0.453006	AA
217.1	ACE2	Nevus, non-neoplastic Both neoplasms	5342	74	1.26162	1.68449	0.45388	EA
70	ACE2	Viral hepatitis Both infectious diseases	6100	351	-0.659849	0.881294	0.454022	AA
578.2	ACE2	Blood in stool Both digestive	6815	273	0.516921	0.690492	0.454082	AA
426	ACE2	Cardiac conduction disorders circulatory system	3517	1589	-0.425296	0.569065	0.454846	EA
286	TMPRSS2	Coagulation defects	6471	158	0.771194	1.03249	0.45511	AA
760	ACE2	Back pain symptoms	6288	633	0.726455	0.973095	0.455341	EA
525	ACE2	Other diseases of the teeth and supporting structures digestive	7166	135	-1.49876	2.01102	0.456107	AA
963.1	TMPRSS2	Antineoplastic and immunosuppressive drugs causing adverse effects	6209	199	0.776304	1.04328	0.456816	AA
277.4	ACE2	Disorders of bilirubin excretion endocrine/metabolic	7552	34	0.994997	1.33784	0.457038	AA
279	ACE2	Disorders involving the immune mechanism endocrine/metabolic	7713	358	-0.758025	1.02002	0.457392	AA
646	ACE2	Other complications of pregnancy NEC Female pregnancy complications	7979	404	-0.750929	1.01069	0.457489	AA
269	ACE2	Proteinuria Both endocrine/metabolic	7691	520	0.397252	0.534887	0.457673	AA
401.22	LY6E	Hypertensive chronic kidney disease	2642	687	1.05819	1.4252	0.457792	EA
327.41	ACE2	Organic or persistent insomnia Both neurological	5111	88	-1.74103	2.34501	0.45782	AA
433.2	ACE2	Occlusion of cerebral arteries Both circulatory system	5515	201	-2.89764	3.90656	0.458246	EA
414.2	ACE2	ASCVD Both circulatory system	6173	133	-1.24718	1.6816	0.458292	AA
250.21	ACE2	Type 2 Diabetes	4279	46	-3.03699	4.09498	0.458306	AA
519	ACE2	Other diseases of respiratory system, not elsewhere classified respiratory	7581	145	0.697308	0.943281	0.459763	AA
394	LY6E	Rheumatic disease of the heart valves	4464	494	0.837527	1.13321	0.459862	EA
783	ACE2	Fever of unknown origin symptoms	6480	191	1.03738	1.40379	0.459918	EA
8	ACE2	Intestinal infection infectious diseases	7600	96	-2.01659	2.7324	0.460498	AA
226	ACE2	Benign neoplasm of thyroid glands neoplasms	7874	17	1.48538	2.01347	0.460683	AA
359	ACE2	Muscular dystrophies and other myopathies neurological	7404	31	1.068	1.44903	0.461097	AA
428.3	TMPRSS2	Heart failure with reduced EF [Systolic or combined heart failure]	6675	769	-0.772314	1.04819	0.461238	AA
255.2	ACE2	Adrenal hypofunction Both endocrine/metabolic	6868	21	1.22371	1.66345	0.461946	AA
782.3	ACE2	Edema Both symptoms	7243	1175	-0.363578	0.494863	0.462519	AA
916	ACE2		7512	374	-0.744231	1.01341	0.462714	AA
214.1	ACE2	Lipoma of skin and subcutaneous tissue Both neoplasms	7800	87	-2.15457	2.93806	0.463357	AA
327	ACE2	Sleep disorders Both nEAological	5216	378	-1.17999	1.60915	0.463376	EA
703	ACE2	Diseases of nail, NOS dermatologic	7205	70	-2.46132	3.35803	0.463581	AA
729	TMPRSS2	Other disorders of soft tissues	5649	269	0.772719	1.05438	0.463639	AA
296.2	ACE2	Depression mental disorders	4859	578	0.719299	0.981508	0.46365	EA
626.8	ACE2	Infertility, female Female genitourinary	6017	117	-1.55619	2.12401	0.463762	AA
198.5	ACE2	Secondary malignancy of brain/spine Both neoplasms	7133	48	1.04629	1.42966	0.464263	AA
250.25	ACE2	Type 2 Diabetes	4346	113	-1.17395	1.60805	0.465364	AA
626.13	ACE2	Irregular menstrual cycle Female genitourinary	6063	163	0.714048	0.978594	0.465593	AA
318	LY6E	Tobacco use disorder	6017	816	0.84461	1.15794	0.465752	EA
110.1	ACE2	Dermatophytosis Both infectious diseases	6284	96	1.2318	1.691	0.466342	EA
530.14	ACE2	Reflux esophagitis Both digestive	4718	208	-0.885751	1.21695	0.466707	AA
694	ACE2	Dyschromia and Vitiligo dermatologic	6445	92	-2.00134	2.75248	0.467161	AA
270.11	ACE2	Disturbances of sulphur-bearing amino-acid metabolism Both endocrine/metabolic	7175	4	1.65292	2.27492	0.467481	AA
965	ACE2	Poisoning by analgesics, antipyretics, and antirheumatics injuries & poisonings	6082	72	-2.09917	2.89156	0.46786	AA
785	TMPRSS2	Abdominal pain	6369	663	0.578439	0.796911	0.46793	EA
53.1	ACE2	Herpes zoster with nervous system complications Both infectious diseases	5782	33	-4.99857	6.89188	0.468278	AA
440.2	ACE2	Atherosclerosis of the extremities Both circulatory system	4940	119	-2.37017	3.27281	0.468944	EA
681.5	TMPRSS2	Cellulitis and abscess of leg, except foot	6546	170	0.749054	1.03433	0.468948	AA
276.6	ACE2	Fluid overload Both endocrine/metabolic	4676	127	0.961984	1.32974	0.469412	EA
782.6	ACE2	Pallor and flushing Both symptoms	6100	32	1.18132	1.6345	0.469841	AA
707.1	ACE2	Decubitus ulcer Both dermatologic	7806	95	-2.00928	2.78071	0.469939	AA
574.1	ACE2	Cholelithiasis Both digestive	7768	234	0.60517	0.837731	0.470053	AA
443	ACE2	Peripheral vascular disease circulatory system	6953	302	-0.77335	1.07223	0.470754	AA
502	ACE2	Postinflammatory pulmonary fibrosis Both respiratory	6582	93	-1.92421	2.67042	0.471178	AA
327.41	ACE2	Organic or persistent insomnia Both nEAological	4881	43	1.75818	2.44047	0.471262	EA
800	ACE2	Fracture of lower limb injuries & poisonings	7325	91	-1.98116	2.75019	0.471297	AA
433.3	LY6E	Cerebral ischemia	5711	397	0.787012	1.09272	0.471381	EA
352	ACE2	Disorders of other cranial nerves nEAological	6316	39	-7.37348	10.2377	0.471384	EA
710.1	ACE2	Osteomyelitis Both musculoskeletal	6182	39	1.81022	2.51485	0.47164	EA
681.2	ACE2	Cellulitis and abscess of face/neck Both dermatologic	6437	61	-2.36016	3.28174	0.472031	AA
721.2	ACE2	Spondylosis with myelopathy Both musculoskeletal	6467	89	-1.67871	2.33769	0.472692	AA
285.1	TMPRSS2	Acute posthemorrhagic anemia	4243	176	0.763525	1.06339	0.472749	AA
507	ACE2	Pleurisy; pleural effusion respiratory	6667	178	-1.10527	1.53998	0.472933	AA
735	ACE2	Acquired foot deformities musculoskeletal	7310	153	0.647024	0.902936	0.473635	AA
316.1	ACE2	Polyneuropathy due to drugs Both mental disorders	4877	30	-4.4478	6.2304	0.475298	AA
327	LY6E	Sleep disorders	5216	378	0.785993	1.10116	0.475358	EA
519.9	ACE2	Symptoms involving respiratory system and other chest symptoms Both respiratory	7537	101	0.780049	1.09309	0.475462	AA
643	ACE2	Excessive vomiting in pregnancy Female pregnancy complications	8066	144	-1.35966	1.90544	0.475493	AA
338.2	ACE2		7018	732	-0.456807	0.640375	0.475634	AA
110.11	ACE2	Dermatophytosis of nail Both infectious diseases	6254	66	1.42634	2.00059	0.47587	EA
758	ACE2	Chromosomal anomalies and genetic disorders congenital anomalies	7936	8	1.2128	1.70203	0.476118	AA
288.3	ACE2	Eosinophilia Both hematopoietic	6366	17	1.22922	1.72661	0.476511	AA
721	ACE2	Spondylosis and allied disorders musculoskeletal	6633	255	-0.803997	1.13008	0.476803	AA
560.4	ACE2	Other intestinal obstruction Both digestive	5692	103	-1.41389	1.99106	0.477629	AA
727.4	ACE2	Ganglion and cyst of synovium, tendon, and bursa Both musculoskeletal	5483	103	-1.53404	2.16028	0.477634	AA
165.1	ACE2	Cancer of bronchus; lung Both neoplasms	8135	163	0.650918	0.918675	0.47861	AA
747.12	ACE2	Valvular heart disease/ heart chambers Both congenital anomalies	6319	219	-2.85317	4.03069	0.479031	EA
282.8	ACE2	Other hemoglobinopathies Both hematopoietic	4140	73	0.758161	1.07185	0.479357	AA
429.1	TMPRSS2	Heart transplant/surgery	6077	171	0.739844	1.04659	0.479623	AA
585	TMPRSS2	Renal failure	6345	1453	-0.550285	0.77981	0.480396	AA
743.21	ACE2	Pathologic fracture of vertebrae Both musculoskeletal	7350	14	1.07236	1.51979	0.48044	AA
743.1	ACE2	Osteoporosis Both musculoskeletal	7503	167	0.709206	1.00673	0.481144	AA
415.1	ACE2	Acute pulmonary heart disease Both circulatory system	5451	110	-2.60551	3.70101	0.481433	EA
709.3	ACE2	Systemic sclerosis Both dermatologic	5932	22	3.01937	4.2926	0.481813	EA
509.1	ACE2	Respiratory failure Both respiratory	5303	208	-2.58242	3.6738	0.4821	EA
429	LY6E	Ill-defined descriptions and complications of heart disease	3567	325	0.825364	1.17575	0.482686	EA
560	ACE2	Intestinal obstruction without mention of hernia digestive	5703	114	-1.30275	1.86095	0.483897	AA
600	ACE2	Hyperplasia of prostate Male genitourinary	6214	569	-0.933068	1.33401	0.484274	EA
842	ACE2	Other sprains and strains Both injuries & poisonings	6233	29	-5.39002	7.71078	0.484537	AA
535.9	ACE2	Gastritis and duodenitis, NOS Both digestive	6791	137	-1.35068	1.93574	0.485327	AA
250.14	ACE2	Type 1 Diabetes	4271	38	-3.51873	5.04402	0.485424	AA
782.3	ACE2	Edema Both symptoms	6368	549	-0.951204	1.36517	0.485948	EA
381.2	ACE2	Eustachian tube disorders Both sense organs	7254	59	-2.74355	3.94152	0.486389	AA
597.8	ACE2	Urethral hypermobility/ISD Both genitourinary	7419	8	1.90789	2.74323	0.486747	AA
250.2	ACE2	Type 2 Diabetes	6731	2498	0.227678	0.32741	0.486809	AA
79	ACE2	Viral infection infectious diseases	6045	296	0.458985	0.660779	0.487298	AA
714.1	ACE2	Rheumatoid arthritis Both musculoskeletal	7125	201	-1.00264	1.44735	0.48847	AA
303.4	ACE2	Somatoform disorder Both mental disorders	3343	28	-3.89987	5.63063	0.48855	AA
966	ACE2	Poisoning by anticonvulsants and anti-Parkinsonism drugs injuries & poisonings	6017	7	1.5743	2.27465	0.48887	AA
939	ACE2	Atopic/contact dermatitis due to other or unspecified dermatologic	6534	662	-0.451423	0.652703	0.489176	AA
610	ACE2	Benign mammary dysplasias Female genitourinary	6718	44	1.13697	1.6446	0.489356	AA
573.6	ACE2	Nonspecific elevation of levels of transaminase or lactic acid dehydrogenase [LDH] Both digestive	5831	72	-3.60941	5.22712	0.48987	EA
571.5	ACE2	Other chronic nonalcoholic liver disease Both digestive	6833	349	-0.654979	0.948819	0.489999	AA
781	TMPRSS2	Symptoms involving nervous and musculoskeletal systems	7754	189	0.715364	1.03738	0.490454	AA
796	TMPRSS2	Elevated prostate specific antigen [PSA]	5811	166	0.761854	1.10604	0.49094	EA
388	ACE2	Other disorders of ear sense organs	7247	47	-3.3166	4.81821	0.491235	AA
184.2	ACE2	Cancer of other female genital organs Female neoplasms	6645	24	-5.56565	8.09081	0.491517	AA
212	ACE2	Benign neoplasm of respiratory and intrathoracic organs neoplasms	8160	30	-5.624	8.19086	0.492323	AA
361	ACE2	Retinal detachments and defects sense organs	6288	31	1.43706	2.09366	0.492469	EA
459.7	ACE2	Blood vessel replaced Both circulatory system	5926	87	-1.72077	2.50825	0.492684	AA
153.3	ACE2	Malignant neoplasm of rectum, rectosigmoid junction, and anus Both neoplasms	6330	67	-1.97107	2.87476	0.492936	AA
561.2	ACE2	Flatulence Both digestive	8003	134	0.727748	1.06215	0.493241	AA
911	ACE2	Blister Both injuries & poisonings	8125	9	1.67326	2.44454	0.493665	AA
459	TMPRSS2	Other disorders of circulatory system	6497	658	-0.711977	1.04039	0.493762	AA
427.42	ACE2	Cardiac arrest Both circulatory system	2017	89	-1.7165	2.50855	0.493813	EA
242	ACE2	Thyrotoxicosis with or without goiter endocrine/metabolic	6724	227	-0.949417	1.38879	0.494209	AA
317	ACE2	Alcohol-related disorders mental disorders	5317	116	-2.11739	3.09935	0.494499	EA
721.1	ACE2	Spondylosis without myelopathy Both musculoskeletal	6080	209	-1.75563	2.57537	0.495428	EA
722	ACE2	Intervertebral disc disorders musculoskeletal	6816	438	-0.558078	0.819197	0.495714	AA
370	ACE2	Keratitis Both sense organs	6770	27	-5.61572	8.24563	0.495837	AA
586.4	ACE2	Stricture/obstruction of ureter Both genitourinary	4941	49	-2.16806	3.18658	0.496269	AA
305.2	ACE2	Eating disorder Both mental disorders	4291	10	2.65921	3.91002	0.49644	EA
751.11	ACE2	Congenital anomalies of female genital organs Female congenital anomalies	7875	9	2.04743	3.01156	0.496596	AA
389.2	ACE2	Conductive hearing loss Both sense organs	7249	49	0.853307	1.25616	0.496951	AA
366.2	TMPRSS2	Senile cataract	6558	290	0.720158	1.06053	0.497105	EA
580	TMPRSS2	Nephritis; nephrosis; renal sclerosis	5068	176	0.706707	1.04115	0.49728	AA
442.11	ACE2	Abdominal aortic aneurysm Both circulatory system	6718	67	-1.88988	2.78459	0.497333	AA
276.14	TMPRSS2	Hypopotassemia	5765	641	-0.704989	1.03999	0.497847	AA
275.6	TMPRSS2	Hypercalcemia	6861	205	0.706705	1.04274	0.497937	AA
740.12	ACE2	Osteoarthrosis, localized, secondary Both musculoskeletal	5564	48	-2.80562	4.14801	0.498801	AA
367	ACE2	Disorders of refraction and accommodation; blindness and low vision sense organs	6644	200	-2.81521	4.16946	0.49955	EA
276.1	LY6E	Electrolyte imbalance	5239	690	0.75887	1.12443	0.499743	EA
627.21	ACE2	Symptomatic artificial menopause Female genitourinary	5902	2	2.60945	3.86716	0.49982	AA
771.2	ACE2	Cramp of limb Both symptoms	6071	91	-1.47336	2.18528	0.500172	AA
535	ACE2	Gastritis and duodenitis digestive	6841	187	-1.00896	1.49839	0.500717	AA
480	ACE2	Pneumonia respiratory	6825	516	-0.496678	0.737673	0.500754	AA
427.2	TMPRSS2	Atrial fibrillation and flutter	4438	2510	-0.549457	0.816278	0.500868	EA
414	LY6E	Other forms of chronic heart disease	3508	518	0.802971	1.19472	0.50152	EA
345.3	TMPRSS2	Convulsions	6900	239	0.697838	1.03851	0.501607	AA
801	ACE2	Fracture of ankle and foot Both injuries & poisonings	6435	45	1.80948	2.69394	0.501784	EA
747.11	ACE2	Cardiac shunt/ heart septal defect Both congenital anomalies	6334	234	0.939277	1.3996	0.502156	EA
368.2	ACE2	Diplopia and disorders of binocular vision Both sense organs	6930	63	0.890458	1.32745	0.502345	AA
514.1	ACE2	Abnormal results of function study of pulmonary system Both respiratory	7148	79	-2.00402	2.9883	0.502461	AA
710	ACE2	Osteomyelitis, periostitis, and other infections involving bone musculoskeletal	6185	42	1.70572	2.54432	0.502601	EA
443.9	ACE2	Peripheral vascular disease, unspecified Both circulatory system	7135	484	0.387271	0.577682	0.502611	AA
384	ACE2	Other disorders of tympanic membrane sense organs	6546	7	2.53539	3.79234	0.503779	EA
465	ACE2	Acute upper respiratory infections of multiple or unspecified sites respiratory	6260	287	0.81193	1.2155	0.504146	EA
704.8	ACE2	Other specified diseases of hair and hair follicles Both dermatologic	6590	32	1.58817	2.37761	0.504153	EA
530.3	ACE2	Stricture and stenosis of esophagus Both digestive	4550	40	-2.7816	4.16557	0.504287	AA
366	TMPRSS2	Cataract	6595	327	0.711825	1.06723	0.504782	EA
513.31	ACE2	Apnea Both respiratory	6654	13	2.21072	3.31612	0.50499	EA
366.1	ACE2	Nonsenile Cataract Both sense organs	6416	6	1.6406	2.46482	0.505664	AA
280.1	ACE2	Iron deficiency anemias, unspecified or not due to blood loss Both hematopoietic	4591	298	-1.58303	2.3787	0.505727	EA
202.21	ACE2	Nodular lymphoma Both neoplasms	7865	5	1.44996	2.17963	0.5059	AA
427.4	ACE2	Cardiac arrest and ventricular fibrillation Both circulatory system	4224	62	0.695214	1.04615	0.506342	AA
772.3	ACE2	Muscle weakness Both symptoms	7052	112	0.696333	1.04814	0.506467	AA
245.21	ACE2	Chronic lymphocytic thyroiditis Both endocrine/metabolic	5264	31	-7.24988	10.9244	0.50692	EA
379.9	ACE2	Pain, swelling or discharge of eye Both sense organs	6717	130	0.616189	0.930542	0.507854	AA
300.4	ACE2	Dysthymic disorder Both mental disorders	3438	123	0.552614	0.834695	0.507936	AA
257.1	ACE2	Testicular hypofunction Male endocrine/metabolic	6982	135	-1.1208	1.69316	0.507997	AA
473.4	ACE2	Voice disturbance Both respiratory	5025	186	-0.82009	1.24211	0.509099	AA
550.6	ACE2	Incisional hernia Both digestive	7068	135	0.61649	0.934813	0.509588	AA
474.2	ACE2	Chronic tonsillitis and adenoiditis Both respiratory	4915	76	0.72261	1.09592	0.509661	AA
202	ACE2	Cancer of other lymphoid, histiocytic tissue neoplasms	7924	64	0.852485	1.29779	0.511262	AA
727	ACE2	Other disorders of synovium, tendon, and bursa musculoskeletal	5832	452	-0.521721	0.794731	0.511519	AA
401.2	ACE2	Hypertensive heart and/or renal disease Both circulatory system	2657	702	0.437249	0.666267	0.511653	EA
110.2	ACE2	Dermatomycoses Both infectious diseases	6049	45	-2.77536	4.23342	0.512092	AA
395	LY6E	Heart valve disorders	5959	1989	-0.7423	1.13606	0.513498	EA
433.31	ACE2	Transient cerebral ischemia Both circulatory system	5829	515	-1.1151	1.70997	0.514324	EA
261	TMPRSS2	Vitamin deficiency	6249	777	-0.685798	1.05195	0.514445	AA
733.4	ACE2	Aseptic necrosis of bone Both musculoskeletal	6648	100	-1.45934	2.24463	0.515595	AA
702.1	TMPRSS2	Actinic keratosis	6504	339	0.68889	1.06034	0.515894	EA
415.1	TMPRSS2	Acute pulmonary heart disease	6836	180	0.673533	1.03781	0.516342	AA
561	ACE2	Symptoms involving digestive system Both digestive	5504	142	-3.8227	5.89559	0.516726	EA
622.1	ACE2	Polyp of corpus uteri Female genitourinary	7808	71	0.966713	1.4916	0.516918	AA
989	ACE2	Toxic effect of other substances, chiefly nonmedicinal as to source injuries & poisonings	6869	35	-6.7516	10.4208	0.517053	EA
977	ACE2	Personal history of allergy to medicinal agents injuries & poisonings	6157	147	0.555085	0.856986	0.517168	AA
313.1	ACE2	Attention deficit hyperactivity disorder Both mental disorders	7947	32	-5.2121	8.05082	0.517374	AA
306	LY6E	Other mental disorder	4718	437	0.762654	1.17887	0.517674	EA
726	ACE2	Peripheral enthesopathies and allied syndromes musculoskeletal	6074	694	0.322315	0.498452	0.517869	AA
170.2	ACE2	Cancer of connective tissue Both neoplasms	8145	34	-4.0483	6.26109	0.517904	AA
626.2	ACE2	Dysmenorrhea Female genitourinary	6007	107	-1.34308	2.07724	0.51791	AA
172.21	ACE2	Basal cell carcinoma Both neoplasms	5995	145	1.02095	1.57921	0.51796	EA
671	ACE2	Venous/cerebrovascular complications embolism in pregnancy and the puerperium Female pregnancy complications	8038	42	-3.42099	5.30048	0.51866	AA
596	ACE2	Other disorders of bladder genitourinary	7613	202	-0.858605	1.33104	0.518885	AA
280	ACE2	Iron deficiency anemias hematopoietic	4479	186	-2.29068	3.55275	0.519081	EA
512	LY6E	Other symptoms of respiratory system	5209	1794	0.645886	1.00191	0.519149	EA
720	TMPRSS2	Spinal stenosis	6654	276	0.679015	1.05386	0.519374	AA
585.4	ACE2	Chronic kidney disease, Stage I or II Both genitourinary	5165	273	-0.57843	0.898718	0.519824	AA
250.24	ACE2	Type 2	4443	145	-1.64766	2.5631	0.520328	EA
367	TMPRSS2	Disorders of refraction and accommodation; blindness and low vision	7113	581	0.494388	0.769305	0.520456	AA
611	ACE2	Abnormal findings on mammogram or breast exam Both genitourinary	6589	66	-4.16214	6.47925	0.520626	EA
706.8	ACE2	Other specified diseases of sebaceous glands Both dermatologic	6697	89	-1.5169	2.36985	0.522119	AA
250.4	TMPRSS2	Abnormal glucose	5084	851	-0.48769	0.762254	0.522303	AA
742.9	ACE2	Other derangement of joint Both musculoskeletal	6841	134	-1.17969	1.84503	0.52257	AA
296.22	TMPRSS2	Major depressive disorder	4615	334	0.690665	1.08081	0.522806	EA
536	ACE2	Disorders of function of stomach digestive	6809	155	-1.06074	1.66058	0.52297	AA
244.2	ACE2	Acquired hypothyroidism Both endocrine/metabolic	5420	187	-2.49205	3.90132	0.522971	EA
733.8	ACE2	Malunion and nonunion of fracture Both musculoskeletal	6102	15	2.21879	3.47533	0.523187	EA
871.2	ACE2	Open wound of finger(s) Both injuries & poisonings	7205	59	-2.34361	3.67296	0.523428	AA
277	ACE2	Other disorders of metabolism endocrine/metabolic	7623	105	-1.48946	2.33565	0.523665	AA
459.1	ACE2	Hemorrhage NOS Both circulatory system	5855	16	1.18385	1.85918	0.524281	AA
702.2	TMPRSS2	Seborrheic keratosis	6501	336	0.671515	1.0548	0.524367	EA
252.1	TMPRSS2	Hyperparathyroidism	7046	199	0.659874	1.03747	0.524749	AA
654.2	ACE2	Rhesus isoimmunization in pregnancy Female pregnancy complications	7636	53	-2.33691	3.67453	0.524792	AA
585.3	TMPRSS2	Chronic renal failure [CKD]	6275	1383	-0.494583	0.780464	0.526274	AA
368.4	ACE2	Visual field defects Both sense organs	6925	58	-2.30413	3.63694	0.526385	AA
54	ACE2	Herpes simplex infectious diseases	6040	291	-0.641128	1.01223	0.526483	AA
743.11	TMPRSS2	Osteoporosis NOS	7557	221	0.669406	1.06016	0.527766	AA
274.11	TMPRSS2	Gouty arthropathy	7608	221	0.661726	1.04868	0.528033	AA
189.12	ACE2	Malignant neoplasm of renal pelvis Both neoplasms	7909	6	1.61437	2.5584	0.528036	AA
414	TMPRSS2	Other forms of chronic heart disease	3508	518	-0.720217	1.14226	0.528353	EA
585.3	TMPRSS2	Chronic renal failure [CKD]	5584	1064	-0.681153	1.08176	0.528908	EA
411.1	ACE2	Unstable angina (intermediate coronary syndrome) Both circulatory system	6175	135	-1.03093	1.63736	0.528939	AA
300	LY6E	Anxiety, phobic and dissociative disorders	4924	643	0.742502	1.18014	0.529242	EA
720.1	TMPRSS2	Spinal stenosis of lumbar region	6670	292	0.663679	1.05501	0.529299	AA
594	ACE2	Urinary calculus Both genitourinary	6626	192	-2.47515	3.93498	0.52934	EA
242.31	ACE2	Thyrotoxic exophthalmos Both endocrine/metabolic	6500	3	2.6226	4.17118	0.529517	AA
695.8	ACE2	Other specified erythematous conditions Both dermatologic	6432	79	0.854945	1.35979	0.529524	AA
244.4	ACE2	Hypothyroidism NOS Both endocrine/metabolic	6993	496	0.419277	0.666928	0.529566	AA
580.1	ACE2	Glomerulonephritis Both genitourinary	4972	80	0.642419	1.02214	0.529674	AA
272.13	ACE2	Mixed hyperlipidemia Both endocrine/metabolic	3410	1311	-0.513797	0.818036	0.529947	EA
195	ACE2	Cancer, suspected or other neoplasms	7225	140	-1.17185	1.86753	0.530341	AA
288.11	ACE2	Neutropenia Both hematopoietic	5870	55	-3.92295	6.25437	0.530506	EA
358.1	ACE2	Myasthenia gravis neurological	7390	17	1.15749	1.84594	0.530627	AA
286.2	TMPRSS2	Encounter for long-term (current) use of anticoagulants	5323	1552	-0.50113	0.800012	0.531051	EA
452.2	ACE2	Deep vein thrombosis [DVT] Both circulatory system	5574	408	0.375036	0.598885	0.531168	AA
450	ACE2	Noninfectious disorders of lymphatic channels Both circulatory system	6858	50	-4.56578	7.30107	0.531736	EA
681.1	ACE2	Cellulitis and abscess of fingers/toes Both dermatologic	6458	82	-1.53147	2.4493	0.531796	AA
291	ACE2	Other specified nonpsychotic and/or transient mental disorders mental disorders	6691	57	-2.4045	3.84596	0.531839	AA
356	ACE2	Hereditary and idiopathic peripheral neuropathy neurological	7515	142	-1.12404	1.7986	0.532	AA
396	ACE2	Abnormal heart sounds Both circulatory system	6816	197	-0.8931	1.42984	0.532223	AA
394.2	ACE2	Mitral valve disease Both circulatory system	6721	102	0.720832	1.15467	0.532445	AA
690	ACE2	Erythematosquamous dermatosis Both dermatologic	6030	38	1.49794	2.40137	0.532769	EA
627.1	ACE2	Postmenopausal bleeding Female genitourinary	6440	42	1.92059	3.08401	0.533444	EA
427.6	ACE2	Premature beats Both circulatory system	2543	615	-0.488934	0.786642	0.53424	EA
512.8	TMPRSS2	Cough	4993	1537	0.338021	0.543942	0.534318	AA
270	ACE2	Disorders of protein plasma/amino-acid transport and metabolism endocrine/metabolic	6570	60	1.28589	2.07318	0.535092	EA
425.1	TMPRSS2	Primary/intrinsic cardiomyopathies	7590	796	-0.643177	1.03933	0.536024	AA
38.1	ACE2	Gram negative septicemia Both infectious diseases	6519	52	-2.18317	3.52954	0.536217	AA
592.1	ACE2	Cystitis Both genitourinary	5412	48	0.888917	1.43894	0.536733	AA
610.1	ACE2	Cystic mastopathy Female genitourinary	6542	19	2.67455	4.33032	0.536817	EA
296	ACE2	Mood disorders mental disorders	4929	648	0.598602	0.969662	0.537017	EA
512.9	ACE2	Other dypnea Both respiratory	4775	1319	-0.23919	0.388089	0.537679	AA
721.2	ACE2	Spondylosis with myelopathy Both musculoskeletal	5904	33	-6.14082	9.98104	0.538391	EA
512.9	TMPRSS2	Other dyspnea	4775	1319	-0.489282	0.796212	0.538876	AA
250.22	ACE2	Type 2	4487	189	-1.3351	2.1729	0.53893	EA
289.3	ACE2	Personal history of diseases of blood and blood-forming organs Both hematopoietic	6382	33	-3.88423	6.3278	0.539324	AA
714.1	ACE2	Rheumatoid arthritis Both musculoskeletal	6254	95	-2.55396	4.16209	0.539463	EA
781	ACE2	Symptoms involving nervous and musculoskeletal systems symptoms	7754	189	-0.958087	1.56323	0.539951	AA
110	ACE2	Dermatophytosis / Dermatomycosis infectious diseases	6290	102	1.06558	1.73867	0.539962	EA
216	ACE2	Benign neoplasm of skin neoplasms	3913	140	-0.800392	1.30635	0.54008	AA
378.1	ACE2	Strabismus (not specified as paralytic) Both sense organs	6620	33	-3.36413	5.49201	0.540173	AA
428	TMPRSS2	Congestive heart failure; nonhypertensive	7024	1118	-0.472798	0.773688	0.541135	AA
174	ACE2	Breast cancer Both neoplasms	6388	118	1.65644	2.71777	0.542203	EA
473.1	ACE2	Chronic laryngitis Both respiratory	4853	14	1.1396	1.87021	0.542295	AA
509.8	TMPRSS2	Dependence on respirator [Ventilator] or supplemental oxygen	6695	206	0.635675	1.04392	0.542572	AA
355	ACE2	Complex regional/central pain syndrome Both nEAological	6286	9	2.37306	3.90532	0.543422	EA
401	LY6E	Hypertension	5624	3669	0.681558	1.12278	0.543832	EA
323	ACE2	Encephalitis neurological	7978	7	1.36198	2.24719	0.54446	AA
367.1	ACE2	Myopia Both sense organs	6573	129	-3.71361	6.12914	0.544585	EA
297.1	ACE2	Suicidal ideation Both mental disorders	3365	50	-1.48828	2.46126	0.545389	AA
574.1	TMPRSS2	Cholelithiasis	7768	234	0.627634	1.03845	0.545582	AA
578.8	ACE2	Hemorrhage of rectum and anus Both digestive	6734	192	-0.829648	1.37713	0.546877	AA
562.1	ACE2	Diverticulosis Both digestive	5571	209	0.757085	1.2583	0.547391	EA
558	ACE2	Noninfectious gastroenteritis Both digestive	5441	79	1.06321	1.77342	0.548822	EA
586	TMPRSS2	Other disorders of the kidney and ureters	5398	506	0.466087	0.777436	0.548827	AA
601.1	ACE2	Prostatitis Male genitourinary	7057	45	-2.0929	3.49211	0.548957	AA
720	ACE2	Spinal stenosis musculoskeletal	6055	184	-1.63068	2.72224	0.54916	EA
591	ACE2	Urinary tract infection genitourinary	5944	354	0.671771	1.12173	0.549259	EA
495.11	ACE2	Chronic obstructive asthma with exacerbation Both respiratory	5585	39	0.901788	1.50697	0.549565	AA
495	TMPRSS2	Asthma	5560	428	0.641	1.0713	0.549616	EA
519.8	ACE2	Other diseases of respiratory system, NEC Both respiratory	7513	77	0.760722	1.27407	0.550454	AA
850	ACE2	Hemorrhage or hematoma complicating a procedure Both injuries & poisonings	5389	116	-3.31241	5.54807	0.550482	EA
475	ACE2	Chronic sinusitis respiratory	5282	443	-0.446935	0.749001	0.550702	AA
245	ACE2	Thyroiditis Both endocrine/metabolic	6530	33	1.0239	1.71968	0.551573	AA
571.51	ACE2	Cirrhosis of liver without mention of alcohol Both digestive	6745	261	0.419689	0.705082	0.551687	AA
747	ACE2	Cardiac and circulatory congenital anomalies congenital anomalies	7994	147	-1.07247	1.80487	0.552371	AA
963.1	ACE2	Antineoplastic and immunosuppressive drugs causing adverse effects Both injuries & poisonings	5306	139	0.861464	1.45145	0.552833	EA
628	TMPRSS2	Ovarian cyst	6144	244	0.647586	1.09116	0.552858	AA
316	TMPRSS2	Substance addiction and disorders	5415	568	-0.61362	1.03657	0.55387	AA
275.5	ACE2	Disorders of calcium/phosphorus metabolism endocrine/metabolic	6038	88	-2.44124	4.12592	0.554061	EA
514.2	ACE2	Solitary pulmonary nodule Both respiratory	7432	363	-0.589485	0.999394	0.555296	AA
427.12	ACE2	Paroxysmal ventricular tachycardia Both circulatory system	4582	420	0.322771	0.547532	0.555525	AA
211	ACE2	Benign neoplasm of other parts of digestive system neoplasms	6523	44	-4.64354	7.88908	0.556128	EA
327.4	ACE2	Insomnia Both neurological	5666	643	-0.377237	0.64096	0.556164	AA
634	ACE2	Miscarriage; stillbirth Female pregnancy complications	7574	160	0.602268	1.0234	0.556199	AA
367	ACE2	Disorders of refraction and accommodation; blindness and low vision sense organs	7113	581	-0.438708	0.746411	0.556695	AA
555	ACE2	Inflammatory bowel disease and other gastroenteritis and colitis digestive	5429	67	1.13196	1.92617	0.556752	EA
428	LY6E	Congestive heart failure; nonhypertensive	5331	2089	-0.680441	1.16137	0.557945	EA
362.4	ACE2	Retinal vascular changes and abnomalities Both sense organs	6203	49	-3.86675	6.60236	0.558103	EA
271.3	ACE2	Intestinal disaccharidase deficiencies and disaccharide malabsorption Both endocrine/metabolic	6772	140	0.967445	1.65319	0.558413	EA
367.8	ACE2	Hypermetropia Both sense organs	6509	65	-3.22272	5.50795	0.558478	EA
433.8	TMPRSS2	Late effects of cerebrovascular disease	7029	213	0.607653	1.04262	0.56002	AA
228	ACE2	Hemangioma and lymphangioma, any site Both neoplasms	8126	24	-4.82398	8.29017	0.560639	AA
743	ACE2	Osteoporosis, osteopenia and pathological fracture musculoskeletal	7708	372	-0.617519	1.06131	0.560671	AA
539	LY6E	Bariatric surgery	6610	512	0.631486	1.08536	0.560687	EA
185	ACE2	Cancer of prostate Male neoplasms	5929	284	-1.38417	2.38166	0.56112	EA
198.1	ACE2	Secondary malignancy of lymph nodes Both neoplasms	7151	66	-1.85899	3.20535	0.561938	AA
276.13	ACE2	Hyperpotassemia Both endocrine/metabolic	4816	267	-0.980642	1.69227	0.562263	EA
401.1	LY6E	Essential hypertension	5720	3765	0.650477	1.12284	0.562378	EA
960	ACE2	Poisoning by antibiotics injuries & poisonings	5291	124	-1.76277	3.04325	0.562428	EA
805	ACE2	Fracture of vertebral column without mention of spinal cord injury injuries & poisonings	7291	57	0.743431	1.28368	0.562495	AA
172.2	ACE2	Other non-epithelial cancer of skin Both neoplasms	6256	406	-1.11115	1.92079	0.562936	EA
339	ACE2	Other headache syndromes nEAological	6502	83	-2.81259	4.86786	0.563407	EA
318	ACE2	Tobacco use disorder Both mental disorders	6017	816	0.501675	0.868483	0.563504	EA
345.1	ACE2	Epilepsy Both neurological	6772	111	-1.08682	1.88265	0.563748	AA
516.1	ACE2	Hemoptysis Both respiratory	6771	41	1.49953	2.59811	0.563829	EA
357	ACE2	Inflammatory and toxic neuropathy neurological	7613	240	-0.708292	1.22724	0.563844	AA
636	ACE2	Early or threatened labor; hemorrhage in early pregnancy Female pregnancy complications	7660	246	-0.662691	1.14823	0.563844	AA
642	ACE2	Hypertension complicating pregnancy, childbirth, and the puerperium Female pregnancy complications	7999	272	0.531712	0.921385	0.563886	AA
710.19	ACE2	Unspecified osteomyelitis Both musculoskeletal	6183	40	1.48317	2.5742	0.564501	EA
415.2	LY6E	Chronic pulmonary heart disease	6038	697	0.646253	1.12219	0.564692	EA
364	ACE2	Corneal opacity and other disorders of cornea Both sense organs	6778	36	-2.96647	5.15783	0.565197	AA
470	ACE2	Septal Deviations/Turbinate Hypertrophy respiratory	4945	106	0.550046	0.961353	0.567214	AA
366.2	ACE2	Senile cataract Both sense organs	6558	290	-1.13699	1.98729	0.567233	EA
733.6	ACE2	Costochondritis Both musculoskeletal	6571	23	-4.13904	7.24519	0.567809	AA
276	ACE2	Disorders of fluid, electrolyte, and acid-base balance Both endocrine/metabolic	5528	979	0.43437	0.761767	0.568533	EA
272.13	TMPRSS2	Mixed hyperlipidemia	5384	1329	-0.456122	0.800853	0.568986	AA
803.2	ACE2	Fracture of radius and ulna Both injuries & poisonings	7306	72	-1.63009	2.86319	0.569136	AA
585.31	ACE2	Renal dialysis Both genitourinary	4658	138	-1.46557	2.57536	0.569305	EA
441	ACE2	Vascular insufficiency of intestine circulatory system	4851	30	-5.1176	9.04757	0.571644	EA
381.11	ACE2	Suppurative and unspecified otitis media Both sense organs	7297	102	-1.30501	2.30754	0.571703	AA
851	ACE2	Complications of transplants and reattached limbs Both injuries & poisonings	6966	312	0.381441	0.674631	0.571797	AA
497	ACE2	Bronchitis Both respiratory	5609	63	-1.66792	2.95534	0.572499	AA
261.4	TMPRSS2	Vitamin D deficiency	6714	1242	0.330224	0.586304	0.573278	AA
348.9	ACE2	Other conditions of brain, NOS Both neurological	6696	35	0.923416	1.63967	0.573317	AA
345.12	ACE2	Partial epilepsy Both neurological	6785	124	-0.989171	1.76096	0.574306	AA
38.3	ACE2	Bacteremia Both infectious diseases	5901	85	-2.29708	4.08969	0.574337	EA
362.4	ACE2	Retinal vascular changes and abnomalities Both sense organs	6567	84	-1.27709	2.27423	0.574426	AA
287	ACE2	Purpura and other hemorrhagic conditions hematopoietic	6514	201	0.450406	0.804723	0.575682	AA
396	TMPRSS2	Abnormal heart sounds	6816	197	0.580464	1.03734	0.575773	AA
317.1	ACE2	Alcoholism Both mental disorders	5126	279	-0.535964	0.960087	0.576677	AA
653	ACE2	Problems associated with amniotic cavity and membranes Female pregnancy complications	7705	122	-0.998178	1.79302	0.57773	AA
381	ACE2	Otitis media and Eustachian tube disorders sense organs	6593	54	1.33838	2.4064	0.578092	EA
275.51	ACE2	Hypocalcemia Both endocrine/metabolic	6737	81	-1.33698	2.40429	0.578155	AA
707	ACE2	Chronic ulcer of skin dermatologic	6718	158	1.0414	1.87611	0.578839	EA
300.13	ACE2	Phobia Both mental disorders	3333	18	0.918704	1.66149	0.580304	AA
530.11	LY6E	GERD	5693	1352	-0.607525	1.09929	0.580502	EA
429.3	ACE2	Symptoms involving cardiovascular system Both circulatory system	3389	147	-1.85547	3.36332	0.581169	EA
276.1	ACE2	Electrolyte imbalance Both endocrine/metabolic	5239	690	-0.686937	1.24725	0.581797	EA
54	ACE2	Herpes simplex infectious diseases	5966	66	-2.81035	5.11235	0.582514	EA
358	ACE2	Myoneural disorders neurological	7385	12	1.13163	2.05874	0.582544	AA
389	TMPRSS2	Hearing loss	6569	319	0.583619	1.06182	0.582566	EA
250.12	ACE2	Type 1 Diabetes	4284	51	-1.39917	2.54635	0.582677	AA
430	ACE2	Intracranial hemorrhage circulatory system	6876	60	-1.61588	2.94569	0.583309	AA
384.4	ACE2	Perforation of tympanic membrane Both sense organs	6548	9	2.25819	4.12486	0.584063	EA
724	ACE2	Other and unspecified disorders of back musculoskeletal	5898	27	1.92226	3.51468	0.58443	EA
573.2	ACE2	Liver replaced by transplant Both digestive	6547	63	0.612481	1.12106	0.58483	AA
8.6	ACE2	Viral Enteritis Both infectious diseases	7551	47	-2.13743	3.91707	0.585292	AA
110.11	TMPRSS2	Dermatophytosis of nail	6224	220	0.564533	1.03553	0.585641	AA
527.7	ACE2	Disturbance of salivary secretion Both digestive	7563	69	-1.66141	3.04762	0.585651	AA
596.5	ACE2	Functional disorders of bladder Both genitourinary	7593	182	-0.739895	1.35732	0.585676	AA
117	ACE2	Mycoses infectious diseases	6048	44	-2.11535	3.8817	0.585784	AA
1004	ACE2	Other signs and symptoms involving emotional state Both NULL	8130	23	-4.35123	7.98557	0.585832	AA
427	TMPRSS2	Cardiac dysrhythmias	5657	1495	-0.365284	0.670875	0.586105	AA
741.4	ACE2	Joint effusions Both musculoskeletal	6524	42	-4.24698	7.82794	0.587446	EA
427.3	ACE2	Other specified cardiac dysrhythmias Both circulatory system	2411	483	-0.527267	0.972611	0.587739	EA
454	ACE2	Varicose veins circulatory system	5241	75	0.692338	1.27721	0.58777	AA
681	TMPRSS2	Superficial cellulitis and abscess	7014	638	-0.558317	1.03077	0.588059	AA
250	ACE2	Diabetes mellitus Both endocrine/metabolic	6212	1979	0.191676	0.354038	0.588232	AA
590	TMPRSS2	Pyelonephritis	5516	152	0.561703	1.03877	0.588687	AA
1005	ACE2	Other symptoms Both NULL	6827	18	1.82403	3.3783	0.589249	EA
323.8	ACE2	Encephalitis, non-infectious Both neurological	7978	7	1.27883	2.37164	0.589736	AA
803	ACE2	Fracture of upper limb Both injuries & poisonings	7294	60	-1.72822	3.21335	0.590697	AA
428.2	ACE2	Heart failure NOS Both circulatory system	6030	124	-0.843131	1.56872	0.590947	AA
427.22	ACE2	Atrial flutter Both circulatory system	4487	325	0.317766	0.593068	0.592097	AA
427.21	LY6E	Atrial fibrillation	4523	2595	-0.6798	1.26882	0.592114	EA
426	TMPRSS2	Cardiac conduction disorders	4866	704	-0.575662	1.07548	0.592469	AA
277	ACE2	Other disorders of metabolism endocrine/metabolic	6500	42	1.35992	2.54209	0.592675	EA
574.3	ACE2	Cholecystitis without cholelithiasis Both digestive	7569	35	0.785304	1.46988	0.593158	AA
722.1	TMPRSS2	Displacement of intervertebral disc	6639	261	0.555533	1.04017	0.593288	AA
274.11	ACE2	Gouty arthropathy Both endocrine/metabolic	6309	88	-2.12679	3.99063	0.594071	EA
979	ACE2	Adverse drug events and drug allergies Both injuries & poisonings	5274	107	-1.74708	3.27941	0.594212	EA
733	TMPRSS2	Other disorders of bone and cartilage	6808	260	0.560902	1.05457	0.594813	AA
199	ACE2	Neoplasm of uncertain behavior Both neoplasms	7306	221	0.462761	0.870528	0.595012	AA
743.2	ACE2	Pathologic fracture Both musculoskeletal	7359	23	-3.88354	7.30611	0.595039	AA
711	ACE2	Arthropathy associated with infections musculoskeletal	6743	17	1.06877	2.01469	0.595776	AA
240	TMPRSS2	Simple and unspecified goiter	6714	217	0.55257	1.04166	0.595786	AA
504	ACE2	Other alveolar and parietoalveolar pneumonopathy Both respiratory	6592	103	0.619696	1.16912	0.596073	AA
691	ACE2	Congenital anomalies of skin Both dermatologic	6376	23	1.0545	1.99004	0.596189	AA
642.1	ACE2	Preeclampsia and eclampsia Female pregnancy complications	7829	102	-1.17992	2.22674	0.596191	AA
112	ACE2	Candidiasis Both infectious diseases	6301	113	-1.8284	3.45075	0.596211	EA
501	ACE2	Pneumonitis due to inhalation of food or vomitus Both respiratory	6523	34	-2.49985	4.71944	0.596326	AA
250.24	TMPRSS2	Type 2 diabetes with neurological manifestations	4668	435	-0.554168	1.04667	0.596489	AA
427	TMPRSS2	Cardiac dysrhythmias	5500	3572	-0.367424	0.694507	0.596776	EA
743.1	ACE2	Osteoporosis Both musculoskeletal	6290	234	-1.84098	3.48473	0.597291	EA
571	ACE2	Chronic liver disease and cirrhosis Both digestive	6722	238	-0.590911	1.11856	0.597308	AA
395.2	ACE2	Nonrheumatic aortic valve disorders Both circulatory system	6912	293	0.411517	0.779509	0.597556	AA
765	ACE2	Cervical radiculitis symptoms	6546	301	0.390079	0.739443	0.597825	AA
272.12	ACE2	Hyperglyceridemia Both endocrine/metabolic	2171	72	-1.48222	2.81046	0.59792	EA
695.81	ACE2	Erythema nodosum Both dermatologic	6363	10	1.50265	2.85555	0.598736	AA
835	ACE2	Internal derangement of knee Both injuries & poisonings	7775	123	-0.995696	1.89263	0.598824	AA
722.6	ACE2	Degeneration of intervertebral disc Both musculoskeletal	6051	180	-1.40303	2.67283	0.599637	EA
571.51	TMPRSS2	Cirrhosis of liver without mention of alcohol	6745	261	0.548323	1.04732	0.600593	AA
377	ACE2	Disorders of optic nerve and visual pathways sense organs	6652	65	-1.39932	2.67632	0.601077	AA
764	TMPRSS2	Sciatica	6890	645	-0.541017	1.03576	0.601433	AA
433.31	LY6E	Transient cerebral ischemia	5829	515	0.567902	1.08726	0.601445	EA
454	ACE2	Varicose veins circulatory system	4451	54	1.25053	2.39495	0.601563	EA
1007	ACE2	Injury to blood vessels Both NULL	8175	3	1.47048	2.81768	0.601757	AA
286.11	ACE2	Von willebrand's disease Both hematopoietic	6316	3	2.1988	4.21705	0.602083	AA
280.2	TMPRSS2	Iron deficiency anemia secondary to blood loss (chronic)	4272	205	0.549747	1.05487	0.602262	AA
697	TMPRSS2	Sarcoidosis	6582	229	0.539483	1.03576	0.602467	AA
628	ACE2	Ovarian cyst Female genitourinary	6144	244	-0.622686	1.19778	0.603156	AA
252.2	ACE2	Hypoparathyroidism Both endocrine/metabolic	6321	11	2.18462	4.20275	0.603198	EA
700	ACE2	Corns and callosities dermatologic	7344	45	-1.99067	3.83151	0.603376	AA
279.7	ACE2	Other immunological findings Both endocrine/metabolic	6463	69	-2.61161	5.03413	0.603914	EA
625	ACE2	Pain and other symptoms associated with female genital organs Female genitourinary	7165	358	-0.526553	1.01499	0.603917	AA
798	LY6E	Malaise and fatigue	5874	1434	-0.568536	1.09721	0.604343	EA
530.11	TMPRSS2	GERD	5693	1352	-0.406025	0.78575	0.605341	EA
302	ACE2	Sexual and gender identity disorders mental disorders	3348	33	0.584911	1.13392	0.605972	AA
795.8	ACE2	Abnormal tumor markers symptoms	8042	9	1.23258	2.39298	0.606495	AA
652	ACE2	Malposition and malpresentation of fetus or obstruction Female pregnancy complications	8139	23	-4.10152	8.01843	0.608993	AA
426.4	ACE2	Anomalous atrioventricular excitation Both circulatory system	1954	26	-2.94782	5.76678	0.609231	EA
272.11	ACE2	Hypercholesterolemia Both endocrine/metabolic	5156	1101	-0.264891	0.519869	0.610377	AA
288.2	TMPRSS2	Elevated white blood cell count	6542	193	0.52527	1.03178	0.610687	AA
627	ACE2	Menopausal and postmenopausal disorders Female genitourinary	6576	178	1.15855	2.27633	0.610785	EA
585.32	ACE2	End stage renal disease Both genitourinary	4745	225	-0.93403	1.83543	0.610831	EA
214	ACE2	Lipoma neoplasms	6784	28	-5.06412	9.95141	0.610833	EA
705.3	ACE2	Hidradenitis Both dermatologic	6676	68	-1.37491	2.70725	0.61155	AA
496.2	ACE2	Chronic bronchitis Both respiratory	5236	104	-2.71145	5.35217	0.61243	EA
496.21	ACE2	Obstructive chronic bronchitis Both respiratory	5197	65	-2.21332	4.37188	0.612673	EA
320	ACE2	Meningitis neurological	7996	25	0.916308	1.81758	0.614166	AA
425.2	TMPRSS2	Secondary/extrinsic cardiomyopathies	7037	243	0.523568	1.03858	0.614177	AA
519.8	ACE2	Other diseases of respiratory system, NEC Both respiratory	6501	39	1.29169	2.56341	0.614336	EA
619.1	ACE2	Noninflammatory disorders of ovary, fallopian tube, and broad ligament Female genitourinary	6744	31	-2.66052	5.28355	0.614579	AA
250.6	TMPRSS2	Polyneuropathy in diabetes	4388	155	0.527552	1.04913	0.615072	AA
199	ACE2	Neoplasm of uncertain behavior Both neoplasms	6307	139	0.858737	1.70955	0.615444	EA
555.21	ACE2	Ulcerative colitis (chronic) Both digestive	5609	20	-3.4495	6.88121	0.616165	AA
250.25	ACE2	Diabetes type 2	4331	33	-3.71722	7.42942	0.616838	EA
304	ACE2	Adjustment reaction Both mental disorders	4345	64	-2.16288	4.32604	0.617099	EA
939	TMPRSS2	Atopic/contact dermatitis due to other or unspecified	6534	662	-0.519549	1.04022	0.617455	AA
724.8	ACE2	Other symptoms referable to back Both musculoskeletal	6447	69	-1.17015	2.344	0.617632	AA
433.6	ACE2	Acute, but ill-defined cerebrovascular disease Both circulatory system	5386	72	-1.89043	3.7903	0.617952	EA
280	ACE2	Iron deficiency anemias hematopoietic	4509	442	-0.34618	0.694651	0.618237	AA
415.21	ACE2	Primary pulmonary hypertension Both circulatory system	5495	154	-1.81489	3.64392	0.618442	EA
1019	ACE2	Other ill-defined and unknown causes of morbidity and mortality Both NULL	8109	7	1.41639	2.84487	0.618571	AA
386.9	ACE2	Dizziness and giddiness (Light-headedness and vertigo) Both sense organs	7020	1055	0.217808	0.437663	0.618723	AA
580.2	ACE2	Nephrotic syndrome without mention of glomerulonephritis Both genitourinary	4943	51	-1.3701	2.75552	0.619033	AA
433.5	ACE2	Cerebral aneurysm Both circulatory system	6899	83	0.653306	1.31445	0.619175	AA
278.1	ACE2	Obesity Both endocrine/metabolic	6161	1146	-0.412182	0.829752	0.619363	EA
300	ACE2	Anxiety disorders Both mental disorders	4038	723	0.2228	0.448528	0.619375	AA
531.1	ACE2	Hemorrhage from gastrointestinal ulcer Both digestive	7815	30	0.852353	1.71777	0.619756	AA
459.9	ACE2	Circulatory disease NEC Both circulatory system	5487	245	-0.920943	1.8567	0.619887	EA
556	ACE2	Ulceration of the lower GI tract Both digestive	5613	24	-2.6239	5.29394	0.620147	AA
270.1	ACE2	Disturbances of amino-acid transport Both endocrine/metabolic	7178	7	1.16721	2.36171	0.62115	AA
507	ACE2	PlEAisy; plEAal effusion respiratory	5311	216	-1.35722	2.74765	0.621337	EA
349	ACE2	Other and unspecified disorders of the nervous system nEAological	6040	14	1.78847	3.63346	0.622563	EA
626.13	ACE2	Irregular menstrual cycle Female genitourinary	6419	21	-6.19854	12.6026	0.622829	EA
800.3	ACE2	Fracture of tibia and fibula Both injuries & poisonings	6410	20	1.76011	3.57994	0.622961	EA
313	ACE2	Pervasive developmental disorders mental disorders	6809	44	1.16554	2.37432	0.6235	EA
496.2	ACE2	Chronic bronchitis Both respiratory	5723	177	0.437614	0.89309	0.624134	AA
411.2	TMPRSS2	Myocardial infarction	6601	561	-0.518358	1.06272	0.625716	AA
389	ACE2	Hearing loss sense organs	6569	319	-0.866942	1.77764	0.625768	EA
747.1	ACE2	Cardiac congenital anomalies Both congenital anomalies	7959	112	-0.998081	2.04866	0.626125	AA
573.7	ACE2	Abnormal results of function study of liver Both digestive	5806	47	1.12337	2.30829	0.626494	EA
41.1	ACE2	Staphylococcus infections Both infectious diseases	6536	69	-1.24571	2.56062	0.626621	AA
427.9	LY6E	Palpitations	3236	1308	0.487111	1.00234	0.626985	EA
81	ACE2	Infection/inflammation of internal prosthetic device; implant; and graft infectious diseases	7729	84	-1.11316	2.29128	0.627092	AA
425.11	ACE2	Hypertrophic obstructive cardiomyopathy Both circulatory system	6835	41	0.719608	1.48315	0.627543	AA
585.1	TMPRSS2	Acute renal failure	6042	1150	-0.375086	0.773278	0.627634	AA
112	TMPRSS2	Candidiasis	6561	557	-0.504454	1.04059	0.627834	AA
512.1	TMPRSS2	Wheezing	3664	208	0.517792	1.06894	0.628104	AA
458	TMPRSS2	Hypotension	6034	195	0.505318	1.04389	0.628334	AA
198.3	ACE2	Secondary malignant neoplasm of digestive systems Both neoplasms	7127	42	0.860887	1.7787	0.628387	AA
313.1	ACE2	Attention deficit hyperactivity disorder Both mental disorders	6811	46	1.15291	2.38315	0.628545	EA
290.3	ACE2	Other persistent mental disorders due to conditions classified elsewhere Both mental disorders	6654	20	-3.27883	6.78297	0.628818	AA
930	ACE2	Allergic reaction to food injuries & poisonings	5830	31	-4.56026	9.43626	0.628904	EA
345.12	ACE2	Partial epilepsy Both nEAological	6052	26	-4.48592	9.29178	0.62925	EA
535.6	ACE2	Duodenitis Both digestive	6689	35	-2.1829	4.54653	0.631139	AA
611	ACE2	Abnormal findings on mammogram or breast exam Both genitourinary	6959	285	0.415495	0.865754	0.631282	AA
1013	ACE2	Asphyxia and hypoxemia Both NULL	6780	99	0.952212	1.98541	0.631509	EA
427.6	LY6E	Premature beats	2543	615	0.594257	1.24314	0.632631	EA
614	ACE2	Inflammatory diseases of female pelvic organs Female genitourinary	7253	508	-0.397074	0.83271	0.633472	AA
250.13	ACE2	Type 1 Diabetes	4283	50	-1.23528	2.59135	0.633579	AA
722.8	ACE2	Postlaminectomy syndrome Both musculoskeletal	6400	22	-3.19406	6.7046	0.633791	AA
588	ACE2	Disorders resulting from impaired renal function genitourinary	4582	62	-2.06825	4.34206	0.63384	EA
442.8	ACE2	Aneurysm of other specified artery Both circulatory system	6673	22	0.994227	2.08776	0.63392	AA
480.5	ACE2	Bronchopneumonia and lung abscess Both respiratory	6320	11	1.35837	2.85364	0.634065	AA
530	LY6E	Diseases of esophagus	5626	1285	-0.52195	1.09854	0.634693	EA
426.31	ACE2	Right bundle branch block Both circulatory system	2107	179	-0.705974	1.48599	0.634726	EA
427.21	TMPRSS2	Atrial fibrillation	4890	728	-0.529776	1.11678	0.63523	AA
276	TMPRSS2	Disorders of fluid, electrolyte, and acid-base balance	5528	979	-0.501934	1.05853	0.63537	EA
457	TMPRSS2	Encounter for long-term (current) use of anticoagulants, antithrombotics, aspirin	5403	237	0.510962	1.07837	0.635623	AA
736.2	ACE2	Acquired deformities of finger Both musculoskeletal	7177	20	-3.46178	7.30833	0.635731	AA
696	ACE2	Psoriasis and related disorders Both dermatologic	5964	92	-1.72556	3.64723	0.636132	EA
411	ACE2	Ischemic Heart Disease circulatory system	5897	2907	-0.352045	0.744567	0.636343	EA
200	ACE2	Myeloproliferative disease neoplasms	6643	57	1.35758	2.87263	0.636504	EA
350	ACE2	Abnormal movement Both neurological	7073	221	-0.549553	1.16443	0.636961	AA
256.4	ACE2	Polycystic ovaries Female endocrine/metabolic	7007	160	0.55544	1.17736	0.637094	AA
687.4	ACE2	Disturbance of skin sensation Both dermatologic	6150	901	0.214298	0.454321	0.637149	AA
426.91	TMPRSS2	Cardiac pacemaker in situ	2525	597	-0.546443	1.15865	0.637197	EA
157	ACE2	Pancreatic cancer neoplasms	7499	26	-2.56169	5.44273	0.637881	AA
614.53	ACE2	Cyst or abscess of Bartholin's gland Female genitourinary	6764	19	-3.52665	7.51562	0.638896	AA
965.1	ACE2	Opiates and related narcotics causing adverse effects in therapeutic use Both injuries & poisonings	6105	95	0.525116	1.11952	0.639032	AA
380.4	ACE2	Impacted cerumen Both sense organs	6680	96	-1.84172	3.93278	0.63957	EA
430.1	ACE2	Subarachnoid hemorrhage Both circulatory system	6847	31	-2.15032	4.61468	0.641235	AA
636.2	ACE2	Early onset of delivery Female pregnancy complications	7443	29	-2.1	4.50695	0.641254	AA
401.22	TMPRSS2	Hypertensive chronic kidney disease	3747	1093	-0.39916	0.858368	0.641916	AA
782.3	LY6E	Edema	6368	549	0.504191	1.08439	0.641965	EA
686.5	ACE2	Pyoderma Both dermatologic	6382	6	1.5945	3.43358	0.642372	AA
355.1	ACE2	Chronic pain syndrome Both neurological	6761	165	0.43415	0.935809	0.642698	AA
433.5	ACE2	Cerebral anEAysm Both circulatory system	5350	36	-3.01135	6.49287	0.642796	EA
635.3	ACE2	Placenta previa and abruptio placenta Female pregnancy complications	7433	19	0.968833	2.09394	0.643591	AA
454.1	ACE2	Varicose veins of lower extremity Both circulatory system	4449	52	1.09004	2.35832	0.64393	EA
759	ACE2	Other and unspecified congenital anomalies congenital anomalies	7956	28	0.853744	1.85036	0.644516	AA
255	ACE2	Disorders of adrenal glands endocrine/metabolic	6940	93	0.560422	1.21558	0.644775	AA
426.22	ACE2	Mobitz II AV block Both circulatory system	1957	29	1.17857	2.55743	0.644913	EA
250.4	ACE2	Abnormal glucose Both endocrine/metabolic	4623	325	-0.920331	2.0009	0.645546	EA
427.2	ACE2	Atrial fibrillation and flutter circulatory system	4698	536	0.240005	0.522189	0.645793	AA
561.1	ACE2	Diarrhea Both digestive	6712	124	-1.51096	3.29089	0.646137	EA
250.2	TMPRSS2	Type 2 diabetes	5777	1479	-0.365469	0.797101	0.646595	EA
916	ACE2		6672	113	0.937947	2.04948	0.647203	EA
250.41	ACE2	Impaired fasting glucose Both endocrine/metabolic	4510	212	-1.178	2.57417	0.647222	EA
573.2	ACE2	Liver replaced by transplant Both digestive	5826	67	0.884462	1.93602	0.647782	EA
573.5	ACE2	Jaundice (not of newborn) Both digestive	6507	23	-2.8854	6.33322	0.64868	AA
496	TMPRSS2	Chronic airway obstruction	6213	667	-0.478599	1.05123	0.648912	AA
568.1	ACE2	Peritoneal adhesions (postoperative) (postinfection) Both digestive	6879	22	-2.86266	6.29601	0.64934	AA
220	ACE2	Benign neoplasm of ovary Female neoplasms	6092	25	1.09762	2.41511	0.649484	AA
1000	ACE2	Burns Both NULL	8149	19	-3.48302	7.66725	0.649633	AA
788	ACE2	Syncope and collapse symptoms	7544	470	-0.345238	0.76092	0.650036	AA
427.11	ACE2	Paroxysmal supraventricular tachycardia Both circulatory system	4402	240	-0.403294	0.891518	0.651004	AA
241.2	TMPRSS2	Nontoxic multinodular goiter	6737	240	0.475268	1.051	0.651122	AA
705.1	ACE2	Dyshidrosis Both dermatologic	6625	17	1.0735	2.37474	0.651233	AA
509.1	ACE2	Respiratory failure Both respiratory	6759	270	0.340636	0.754281	0.651555	AA
277.5	ACE2	Other disorders of lipoid metabolism endocrine/metabolic	7579	61	0.640449	1.41881	0.651702	AA
350.2	ACE2	Abnormality of gait Both nEAological	6416	127	0.971381	2.15213	0.651731	EA
8.52	ACE2	Intestinal infection due to C. difficile Both infectious diseases	6664	65	1.01017	2.23841	0.651782	EA
803.1	ACE2	Fracture of humerus Both injuries & poisonings	7265	31	0.79936	1.77318	0.65213	AA
611.1	TMPRSS2	Abnormal mammogram	6934	260	0.480012	1.06719	0.65286	AA
79	ACE2	Viral infection infectious diseases	6085	185	0.630002	1.40347	0.653513	EA
915	ACE2	Superficial injury without mention of infection Both injuries & poisonings	8037	61	-1.30853	2.91705	0.653733	AA
332	ACE2	Parkinson's disease nEAological	6080	54	1.30133	2.90385	0.654052	EA
571.5	ACE2	Other chronic nonalcoholic liver disease Both digestive	5997	238	-0.867318	1.93767	0.654435	EA
741.2	ACE2	Stiffness of joint Both musculoskeletal	6749	42	-1.54535	3.4544	0.654618	AA
620	ACE2	Dysplasia of female genital organs Female genitourinary	7755	18	-3.58075	8.00479	0.65464	AA
513.8	ACE2	Disorders of diaphragm Both respiratory	7707	35	-2.01702	4.51289	0.654913	AA
395.1	TMPRSS2	Nonrheumatic mitral valve disorders	5007	1037	0.369129	0.825919	0.654925	EA
710.11	ACE2	Acute osteomyelitis Both musculoskeletal	6774	48	-1.29086	2.89149	0.655283	AA
191.11	ACE2	Cancer of brain Both neoplasms	8056	13	1.02902	2.30659	0.655511	AA
70.9	ACE2	Hepatitis NOS Both infectious diseases	5783	34	-1.79844	4.03321	0.655663	AA
696.4	ACE2	Psoriasis Both dermatologic	5962	90	-1.61109	3.61426	0.655772	EA
257	ACE2	Testicular dysfunction Male endocrine/metabolic	6355	45	1.09323	2.45357	0.65591	EA
1011	ACE2	Complications of surgical and medical procedures Both NULL	7848	171	0.406936	0.913933	0.656134	AA
573.9	TMPRSS2	Abnormal serum enzyme levels	6725	241	0.461237	1.03597	0.65616	AA
715	ACE2	Other inflammatory spondylopathies musculoskeletal	6966	42	0.606233	1.3647	0.656879	AA
394.4	ACE2	Acute rheumatic heart disease Both circulatory system	3997	27	1.95867	4.40981	0.656925	EA
585.31	ACE2	Renal dialysis Both genitourinary	5451	559	0.204912	0.461417	0.656975	AA
578.2	TMPRSS2	Blood in stool	6815	273	0.459879	1.03943	0.658175	AA
564	ACE2	Functional digestive disorders digestive	5462	100	-2.52962	5.71981	0.658304	EA
277.7	ACE2	Dysmetabolic syndrome X endocrine/metabolic	7576	58	-1.37549	3.112	0.658494	AA
649.1	ACE2	Diabetes or abnormal glucose tolerance complicating pregnancy Female pregnancy complications	7324	148	-0.580764	1.31578	0.658935	AA
530	ACE2	Diseases of esophagus digestive	6189	1679	-0.17873	0.405345	0.65926	AA
733.8	ACE2	Malunion and nonunion of fracture Both musculoskeletal	6566	18	0.854094	1.93919	0.65962	AA
510	TMPRSS2	Other diseases of lung	7919	260	0.454978	1.03339	0.659736	AA
31	ACE2	Diseases due to other mycobacteria infectious diseases	6488	21	-2.91496	6.63653	0.660495	AA
429.3	ACE2	Symptoms involving cardiovascular system Both circulatory system	6046	140	-0.604141	1.37751	0.66097	AA
840	TMPRSS2	Sprains and strains	6849	645	-0.453767	1.03595	0.661372	AA
569.2	ACE2	Gastrointestinal complications Both digestive	6887	30	-2.10565	4.80964	0.661533	AA
745	ACE2	Pain in joint musculoskeletal	6364	916	0.344381	0.786771	0.661593	EA
766	ACE2	Neuralgia, neuritis, and radiculitis NOS symptoms	6456	211	-0.529721	1.21116	0.661844	AA
260	ACE2	Protein-calorie malnutrition endocrine/metabolic	5769	196	-1.22552	2.80592	0.662283	EA
964.1	ACE2	Anticoagulants causing adverse effects Both injuries & poisonings	6040	30	-1.93944	4.44542	0.662635	AA
738	ACE2	Other acquired musculoskeletal deformity musculoskeletal	7211	54	0.652873	1.49678	0.662703	AA
289.4	ACE2	Lymphadenitis Both hematopoietic	6660	311	-0.420504	0.964253	0.662769	AA
158	ACE2	Neoplasm of unspecified nature of digestive system Both neoplasms	6428	28	1.41089	3.23851	0.663082	EA
260.2	ACE2	severe protein-calorie malnutrition Both endocrine/metabolic	5587	115	-0.634321	1.45651	0.663193	AA
634.1	ACE2	Missed abortion/Hydatidiform mole Female pregnancy complications	7459	45	-1.44528	3.32711	0.664002	AA
411.2	TMPRSS2	Myocardial infarction	3891	901	-0.385184	0.887981	0.664452	EA
530.1	LY6E	Esophagitis, GERD and related diseases	5540	1199	-0.47578	1.09899	0.665069	EA
215	ACE2	Other benign neoplasm of connective and other soft tissue neoplasms	7785	72	0.628063	1.451	0.665124	AA
250.23	TMPRSS2	Type 2 diabetes with ophthalmic manifestations	4641	408	-0.454435	1.0502	0.665222	AA
333.3	ACE2	Tics and choreas Both neurological	6664	3	1.6285	3.77326	0.66604	AA
504	ACE2	Other alveolar and parietoalveolar pneumonopathy Both respiratory	5249	154	-1.46476	3.3946	0.666107	EA
535.1	ACE2	Acute gastritis Both digestive	6663	9	1.21389	2.81549	0.666362	AA
599.8	ACE2	Other symptoms involving urinary system Both genitourinary	5127	59	-1.00032	2.33431	0.668266	AA
425	TMPRSS2	Cardiomyopathy	7452	658	-0.445519	1.04031	0.668464	AA
352	ACE2	Disorders of other cranial nerves neurological	6651	55	-1.13739	2.65844	0.668767	AA
174.1	ACE2	Breast cancer [female] Female neoplasms	6398	128	1.21386	2.83968	0.669041	EA
8.52	ACE2	Intestinal infection due to C. difficile Both infectious diseases	7590	86	-0.943887	2.20989	0.669293	AA
338	ACE2	Pain NEC neurological	6649	363	-0.359748	0.843625	0.669794	AA
747.1	TMPRSS2	Cardiac congenital anomalies	6551	451	0.455963	1.07094	0.670284	EA
696.41	ACE2	Psoriasis vulgaris Both dermatologic	5962	90	-1.54397	3.62814	0.670433	EA
379.2	ACE2	Disorders of vitreous body Both sense organs	6542	147	-1.6745	3.93544	0.670478	EA
626.1	ACE2	Irregular menstrual cycle/bleeding Female genitourinary	6476	576	-0.316537	0.744084	0.670542	AA
433.2	TMPRSS2	Occlusion of cerebral arteries	7064	248	0.442478	1.04269	0.671301	AA
79.9	ACE2	Viremia, NOS Both infectious diseases	5822	73	-0.902457	2.1303	0.671836	AA
345	TMPRSS2	Epilepsy, recurrent seizures, convulsions	6960	299	0.439281	1.03786	0.672107	AA
817	ACE2	Concussion injuries & poisonings	7897	40	0.685019	1.62068	0.672533	AA
208	ACE2	Benign neoplasm of colon neoplasms	6467	440	-0.735279	1.74024	0.672649	EA
593.2	TMPRSS2	Microscopic hematuria	5595	231	0.439576	1.04039	0.672653	AA
644	ACE2	Anemia during pregnancy Female pregnancy complications	7976	291	-0.449015	1.06427	0.673099	AA
695.1	ACE2	Toxic erythema Both dermatologic	6361	8	1.33387	3.16678	0.673605	AA
714	ACE2	Rheumatoid arthritis and other inflammatory polyarthropathies musculoskeletal	7112	188	-0.561868	1.336	0.674078	AA
710.12	ACE2	Chronic osteomyelitis Both musculoskeletal	6775	49	-1.18818	2.82969	0.67456	AA
285.21	ACE2	Anemia in chronic kidney disease Both hematopoietic	4419	126	0.636712	1.51866	0.675027	EA
411.2	LY6E	Myocardial infarction	3891	901	0.50417	1.20351	0.675277	EA
575.6	ACE2	Cholesterolosis of gallbladder Both digestive	7543	9	1.07434	2.56556	0.675395	AA
433	TMPRSS2	Cerebrovascular disease	7404	588	-0.436495	1.04328	0.675664	AA
512.8	TMPRSS2	Cough	3993	578	-0.442906	1.05956	0.67594	EA
613.7	ACE2	Other signs and symptoms in breast Both genitourinary	6766	11	2.18568	5.25404	0.67741	EA
259	ACE2	Other endocrine disorders endocrine/metabolic	6880	33	0.801685	1.93007	0.677873	AA
770	ACE2	Myalgia and myositis unspecified symptoms	6692	201	-1.011	2.43525	0.678029	EA
619.5	ACE2	Noninflammatory disorders of vulva and perineum Female genitourinary	6761	48	-1.46632	3.5336	0.678168	AA
609.1	ACE2	Infertility, male Male genitourinary	6693	27	-1.68454	4.0643	0.678528	AA
963	ACE2	Poisoning by primarily systemic agents injuries & poisonings	6153	143	-0.554022	1.3437	0.680113	AA
574.1	ACE2	Cholelithiasis Both digestive	6632	91	-1.61132	3.90919	0.680201	EA
609	ACE2	Male infertility and abnormal spermatozoa Male genitourinary	6693	27	-1.65254	4.02712	0.681548	AA
479	ACE2	Other upper respiratory disease Both respiratory	5636	138	0.668022	1.63044	0.682012	EA
263	ACE2	Other nutritional deficiency endocrine/metabolic	5598	25	1.14741	2.80231	0.682207	EA
8	ACE2	Intestinal infection infectious diseases	6666	67	0.966353	2.36265	0.682531	EA
637	ACE2	Short gestation; low birth weight; and fetal growth retardation Both pregnancy complications	7419	15	-2.67752	6.55094	0.682743	AA
227	ACE2	Benign neoplasm of other endocrine glands and related structures neoplasms	7918	61	0.611799	1.50009	0.68339	AA
745	TMPRSS2	Pain in joint	7165	3192	0.196186	0.481226	0.68351	AA
593.2	ACE2	Microscopic hematuria Both genitourinary	5595	231	0.326329	0.802902	0.684421	AA
770	TMPRSS2	Myalgia and myositis unspecified	7526	568	0.307574	0.758699	0.685186	AA
416	ACE2	Cardiomegaly Both circulatory system	5428	87	-2.09669	5.17196	0.685187	EA
796	ACE2	Elevated prostate specific antigen [PSA] Male genitourinary	5811	166	-0.882487	2.178	0.685344	EA
189.11	ACE2	Malignant neoplasm of kidney, except pelvis Both neoplasms	6744	68	-1.73207	4.27541	0.685386	EA
425.12	ACE2	Other hypertrophic cardiomyopathy Both circulatory system	6832	38	-1.48609	3.67068	0.685585	AA
250	TMPRSS2	Diabetes mellitus	5719	1421	-0.322591	0.797654	0.6859	EA
804	ACE2	Fracture of hand or wrist Both injuries & poisonings	7331	97	0.443496	1.09875	0.68648	AA
783	ACE2	Fever of unknown origin symptoms	7289	436	-0.313212	0.776005	0.686491	AA
378.1	ACE2	Strabismus (not specified as paralytic) Both sense organs	6420	25	-4.09881	10.1579	0.686572	EA
724.8	ACE2	Other symptoms referable to back Both musculoskeletal	5881	10	1.86005	4.61769	0.687089	EA
475	ACE2	Chronic sinusitis respiratory	5766	268	-0.920829	2.28608	0.687096	EA
614	ACE2	Inflammatory diseases of female pelvic organs Female genitourinary	6818	29	-4.81865	11.9833	0.687599	EA
555.1	ACE2	Regional enteritis Both digestive	5643	54	0.512546	1.27512	0.687713	AA
281	ACE2	Other deficiency anemia hematopoietic	4115	48	-0.958481	2.39033	0.688433	AA
381.1	ACE2	Otitis media Both sense organs	6594	55	1.13539	2.83254	0.68854	EA
278.4	TMPRSS2	Abnormal weight gain	4043	222	0.42446	1.06577	0.690435	AA
339	TMPRSS2	Other headache syndromes	7037	544	-0.412038	1.03542	0.690673	AA
513	ACE2	Respiratory abnormalities respiratory	7739	67	-1.00273	2.52029	0.690733	AA
216	ACE2	Benign neoplasm of skin neoplasms	5655	387	-0.646876	1.6276	0.691042	EA
386.2	ACE2	Peripheral or central vertigo sense organs	6044	79	-0.842621	2.12207	0.691312	AA
197	ACE2	Chemotherapy neoplasms	6288	120	0.788469	1.99119	0.69212	EA
562.2	ACE2	Diverticulitis Both digestive	5454	92	0.808586	2.0425	0.692194	EA
272	TMPRSS2	Disorders of lipoid metabolism	5643	3544	0.281142	0.710332	0.69226	EA
10	ACE2	Tuberculosis infectious diseases	5822	6	1.85007	4.6774	0.692449	EA
702	ACE2	Degenerative skin conditions and other dermatoses dermatologic	7123	48	-1.24514	3.14921	0.692562	AA
340	ACE2	Migraine nEAological	6587	168	-1.57208	3.98155	0.692959	EA
275.6	ACE2	Hypercalcemia Both endocrine/metabolic	6002	52	1.07767	2.73103	0.693136	EA
600	TMPRSS2	Hyperplasia of prostate	6214	569	-0.449944	1.14238	0.693681	EA
300.12	ACE2	Agorophobia, social phobia, and panic disorder Both mental disorders	3430	115	0.385902	0.982312	0.69443	AA
617	ACE2	Disorders secondary to childbirth, surgery, trauma Female genitourinary	7847	211	-0.536402	1.36592	0.694538	AA
365.2	ACE2	Primary angle-closure glaucoma Both sense organs	6283	26	-3.87854	9.90593	0.6954	EA
428	ACE2	Congestive heart failure; nonhypertensive circulatory system	7024	1118	-0.186902	0.478303	0.695974	AA
386	ACE2	Vertiginous syndromes and other disorders of vestibular system sense organs	6008	43	-1.22486	3.14743	0.697155	AA
414	ACE2	Other forms of chronic heart disease Both circulatory system	3508	518	-0.509979	1.31084	0.697242	EA
368	ACE2	Visual disturbances sense organs	7280	413	0.276642	0.713237	0.698113	AA
636.3	ACE2	Hemorrhage in early pregnancy Female pregnancy complications	7583	169	-0.504642	1.30381	0.698718	AA
756	ACE2	Other congenital musculoskeletal anomalies congenital anomalies	7950	10	1.16886	3.02595	0.699291	AA
580.3	ACE2	Nephritis and nephropathy without mention of glomerulonephritis Both genitourinary	4973	81	0.461293	1.19459	0.699385	AA
745	TMPRSS2	Pain in joint	6364	916	0.309115	0.802937	0.700252	EA
586	ACE2	Other disorders of the kidney and ureters genitourinary	4813	293	-0.572759	1.48929	0.700544	EA
525	ACE2	Other diseases of the teeth and supporting structures digestive	6594	23	-3.91983	10.1989	0.700727	EA
288.1	ACE2	Decreased white blood cell count Both hematopoietic	6492	143	-0.524853	1.36795	0.701217	AA
530.14	ACE2	Reflux esophagitis Both digestive	4433	92	-1.65816	4.34402	0.702676	EA
260.2	ACE2	severe protein-calorie malnutrition Both endocrine/metabolic	5620	47	0.904504	2.37339	0.703128	EA
613	ACE2	Other nonmalignant breast conditions Both genitourinary	6783	28	1.6741	4.39365	0.703182	EA
656	ACE2	Other perinatal conditions of fetus or newborn Both pregnancy complications	8054	144	-0.602576	1.58761	0.704281	AA
348.7	ACE2	Coma Both neurological	6855	194	-0.435667	1.14859	0.704461	AA
989	ACE2	Toxic effect of other substances, chiefly nonmedicinal as to source injuries & poisonings	8023	172	0.373118	0.984791	0.704777	AA
510	ACE2	Other diseases of lung respiratory	6505	202	-1.13281	2.99569	0.705322	EA
764	ACE2	Sciatica symptoms	6890	645	0.219659	0.581425	0.705584	AA
472	ACE2	Chronic pharyngitis and nasopharyngitis respiratory	5637	139	-1.26219	3.34518	0.705939	EA
599.5	TMPRSS2	Frequency of urination and polyuria	5756	261	0.399786	1.06135	0.706415	EA
433	ACE2	Cerebrovascular disease circulatory system	7404	588	0.213033	0.567023	0.707136	AA
198.6	ACE2	Secondary malignancy of bone Both neoplasms	7156	71	0.559432	1.49046	0.707406	AA
342	ACE2	Hemiplegia neurological	6698	37	-1.36988	3.65199	0.707582	AA
300	ACE2	Anxiety disorders Both mental disorders	4924	643	0.385978	1.02932	0.707672	EA
216.1	TMPRSS2	Screening for malignant neoplasms of the skin	6269	1001	-0.413349	1.10274	0.707781	EA
427.8	ACE2	Sinoatrial node dysfunction (Bradycardia) Both circulatory system	4270	108	-0.497755	1.33115	0.708458	AA
426.92	LY6E	Cardiac defibrillator in situ	2797	869	0.469782	1.25642	0.708475	EA
611.1	ACE2	Abnormal mammogram Both genitourinary	6934	260	-0.418693	1.1209	0.708753	AA
1015	ACE2	Effects of other external causes Both NULL	6671	124	-1.20843	3.23559	0.708791	EA
426.9	ACE2	Cardiac pacemaker/device in situ Both circulatory system	3150	1222	0.200968	0.538564	0.709034	EA
296.22	ACE2	Major depressive disorder Both mental disorders	4401	1086	-0.154058	0.413192	0.709261	AA
537	ACE2	Other disorders of stomach and duodenum digestive	6342	80	-2.02441	5.43532	0.709555	EA
159.2	ACE2	Malignant neoplasm of small intestine, including duodenum Both neoplasms	7482	9	1.26681	3.40193	0.709611	AA
739	ACE2	Contracture of joint musculoskeletal	7209	52	-1.08351	2.91389	0.71001	AA
272.11	LY6E	Hypercholesterolemia	3320	1221	0.387066	1.04094	0.710011	EA
369	ACE2	Infection of the eye sense organs	6847	104	-0.701153	1.88586	0.710046	AA
454.11	ACE2	Varicose veins of lower extremity, symptomtic Both circulatory system	5259	93	0.45274	1.2197	0.710496	AA
429.1	TMPRSS2	Heart transplant/surgery	3594	352	0.403359	1.08683	0.710538	EA
428.4	TMPRSS2	Heart failure with preserved EF [Diastolic heart failure]	6436	530	-0.390726	1.05348	0.710718	AA
938	ACE2	Dermatitis due to solar radiation Both dermatologic	5874	75	-1.95095	5.26049	0.710735	EA
626.11	ACE2	Absent or infrequent menstruation Female genitourinary	6415	17	-4.51821	12.2087	0.711323	EA
627	ACE2	Menopausal and postmenopausal disorders Female genitourinary	6282	382	-0.337374	0.912264	0.711516	AA
571.51	ACE2	Cirrhosis of liver without mention of alcohol Both digestive	5914	155	-1.17547	3.1902	0.712527	EA
613.9	ACE2	Breast disorder NOS Both genitourinary	7449	16	-2.76182	7.50031	0.712703	AA
556.11	ACE2	Angiodysplasia of intestine (without mention of hemorrhage) Both digestive	5608	19	-1.79391	4.87773	0.71304	AA
613.5	ACE2	Mastodynia Both genitourinary	6789	34	1.4186	3.8624	0.713406	EA
355.1	ACE2	Chronic pain syndrome Both nEAological	6301	24	1.24327	3.39327	0.714073	EA
457	ACE2	Encounter for long-term (current) use of anticoagulants, antithrombotics, aspirin circulatory system	4703	306	-0.696476	1.90295	0.714367	EA
327.5	ACE2	Parasomnia Both neurological	5049	26	-1.44156	3.94462	0.714775	AA
979	ACE2	Adverse drug events and drug allergies Both injuries & poisonings	6203	193	0.322266	0.882562	0.715001	AA
681	ACE2	Superficial cellulitis and abscess Both dermatologic	6358	221	-0.874934	2.3988	0.715307	EA
558	ACE2	Noninfectious gastroenteritis Both digestive	5771	182	-0.403123	1.10682	0.715696	AA
701	ACE2	Other hypertrophic and atrophic conditions of skin Both dermatologic	7504	205	-0.436258	1.1997	0.716126	AA
371.2	ACE2	Conjunctivitis, noninfectious Both sense organs	6417	9	1.99644	5.49551	0.716392	EA
851	TMPRSS2	Complications of transplants and reattached limbs	6966	312	0.37823	1.04148	0.716482	AA
370.1	ACE2	Corneal ulcer Both sense organs	6762	19	0.837625	2.30783	0.716643	AA
276.12	ACE2	Hyposmolality and/or hyponatremia Both endocrine/metabolic	5416	292	-0.287175	0.792091	0.716939	AA
690	ACE2	Erythematosquamous dermatosis Both dermatologic	6416	63	-0.980389	2.70541	0.717067	AA
717	ACE2	Polymyalgia Rheumatica musculoskeletal	8177	29	-1.56741	4.32672	0.717155	AA
735	ACE2	Acquired foot deformities musculoskeletal	6542	57	1.03082	2.84657	0.717258	EA
371	ACE2	Inflammation of the eye sense organs	6490	82	-2.1105	5.83464	0.717562	EA
184	ACE2	Cancer of other female genital organs Female neoplasms	6667	46	0.690922	1.9107	0.717645	AA
743.13	ACE2	Other specified osteoporosis Both musculoskeletal	7358	22	0.794381	2.19777	0.717764	AA
701	ACE2	Other hypertrophic and atrophic conditions of skin Both dermatologic	6626	134	-1.36039	3.77031	0.718236	EA
327.4	TMPRSS2	Insomnia	5121	283	0.381142	1.05744	0.718519	EA
550.2	ACE2	Diaphragmatic hernia Both digestive	6209	144	-1.34505	3.75359	0.720091	EA
291	ACE2	Other specified nonpsychotic and/or transient mental disorders mental disorders	5966	25	1.31432	3.66964	0.720224	EA
796	ACE2	Elevated prostate specific antigen [PSA] Male genitourinary	7339	327	0.280231	0.783709	0.720665	AA
300.8	ACE2	Acute reaction to stress Both mental disorders	3352	37	0.516372	1.44651	0.721109	AA
735.3	ACE2	Hallux valgus (Bunion) Both musculoskeletal	6509	24	-3.56576	9.98901	0.721116	EA
532	ACE2	Dysphagia Both digestive	4608	267	-0.544822	1.52722	0.721285	EA
785	LY6E	Abdominal pain	6369	663	0.393887	1.10568	0.721661	EA
716.9	ACE2	Arthropathy NOS Both musculoskeletal	6312	169	-0.879446	2.471	0.72191	EA
430.3	ACE2	Subdural hemorrhage Both circulatory system	6851	35	0.520892	1.46419	0.722025	AA
585.33	ACE2	Chronic Kidney Disease, Stage III Both genitourinary	5709	817	-0.181799	0.511351	0.722196	AA
216.1	ACE2	Screening for malignant neoplasms of the skin Both neoplasms	6269	1001	-0.365881	1.03011	0.72245	EA
289	ACE2	Other diseases of blood and blood-forming organs hematopoietic	6397	48	0.577925	1.62829	0.722645	AA
611.11	ACE2	Mammographic microcalcification Both genitourinary	6695	21	-1.83491	5.17497	0.722908	AA
614.32	ACE2	Chronic inflammatory pelvic disease Female genitourinary	6762	17	0.944401	2.66575	0.723135	AA
580.1	ACE2	Glomerulonephritis Both genitourinary	4545	25	-2.86316	8.08365	0.723195	EA
261.4	ACE2	Vitamin D deficiency Both endocrine/metabolic	5910	337	-0.566374	1.59949	0.723267	EA
371.3	ACE2	Inflammation of eyelids Both sense organs	6518	110	-1.17247	3.31352	0.723457	EA
574.11	ACE2	Cholelithiasis with acute cholecystitis Both digestive	7545	11	0.937671	2.65023	0.723483	AA
362.2	ACE2	Degeneration of macula and posterior pole of retina sense organs	6549	66	-0.794309	2.24949	0.724009	AA
368.9	ACE2	Subjective visual disturbances Both sense organs	6922	55	0.615933	1.7498	0.724836	AA
191.1	ACE2	Cancer of brain and nervous system Both neoplasms	8052	9	0.952147	2.70884	0.725216	AA
427.7	ACE2	Tachycardia NOS Both circulatory system	4570	408	-0.261867	0.745162	0.725271	AA
451	ACE2	Phlebitis and thrombophlebitis circulatory system	5234	68	-0.745551	2.12283	0.725434	AA
994.2	ACE2	Sepsis Both injuries & poisonings	6598	292	-0.781965	2.22787	0.725594	EA
244.4	TMPRSS2	Hypothyroidism NOS	6993	496	-0.365609	1.04183	0.725642	AA
522	ACE2	Diseases of pulp and periapical tissues digestive	7067	36	0.652801	1.86295	0.726029	AA
618	ACE2	Genital prolapse Female genitourinary	8084	94	0.525479	1.49976	0.726057	AA
276.1	TMPRSS2	Electrolyte imbalance	5988	864	-0.266986	0.762385	0.726189	AA
726.1	ACE2	Enthesopathy Both musculoskeletal	5969	142	-0.910632	2.60091	0.726248	EA
374.1	ACE2	Ectropion or entropion Both sense organs	6760	17	-2.11432	6.05938	0.72714	AA
280.1	ACE2	Iron deficiency anemias, unspecified or not due to blood loss Both hematopoietic	4956	889	-0.168224	0.482408	0.727302	AA
456	ACE2	Chronic venous insufficiency [CVI] Both circulatory system	5295	129	0.377118	1.08242	0.727539	AA
242.3	ACE2	Exophthalmos Both endocrine/metabolic	6529	32	0.672662	1.93114	0.727597	AA
429.1	ACE2	Heart transplant/surgery Both circulatory system	3594	352	-0.598628	1.72413	0.728437	EA
340	TMPRSS2	Migraine	6989	496	-0.361319	1.04128	0.728596	AA
681.5	ACE2	Cellulitis and abscess of leg, except foot Both dermatologic	6222	85	0.745405	2.14842	0.728626	EA
585.31	TMPRSS2	Renal dialysis	5451	559	-0.362565	1.04682	0.729081	AA
801.1	ACE2	Fracture of foot Both injuries & poisonings	7276	42	-1.17669	3.39979	0.729262	AA
540.11	ACE2	Acute appendicitis Both digestive	8141	18	-2.56292	7.41058	0.729458	AA
394.7	ACE2	Disease of tricuspid valve Both circulatory system	4208	238	0.66723	1.93027	0.729594	EA
250.23	ACE2	Type 2 Diabetes	4641	408	-0.239221	0.692232	0.729659	AA
427.12	LY6E	Paroxysmal ventricular tachycardia	2811	883	0.42993	1.25103	0.731102	EA
364	ACE2	Corneal opacity and other disorders of cornea Both sense organs	6279	22	-3.40319	9.92412	0.731658	EA
427.41	ACE2	Ventricular fibrillation and flutter Both circulatory system	1988	60	-0.867892	2.5347	0.732047	EA
756.5	ACE2	Congenital osteodystrophies Both congenital anomalies	7967	27	0.724284	2.11637	0.732179	AA
402	ACE2	Elevated blood pressure reading without diagnosis of hypertension Both circulatory system	7928	125	0.395979	1.15943	0.732705	AA
271.9	ACE2	Other disorders of carbohydrate transport and metabolism Both endocrine/metabolic	7042	12	0.929857	2.73563	0.733927	AA
695	ACE2	Erythematous conditions dermatologic	6119	127	0.68762	2.02867	0.734647	EA
577.3	ACE2	Cyst and pseudocyst of pancreas Both digestive	7910	56	0.501657	1.48338	0.735224	AA
361	ACE2	Retinal detachments and defects sense organs	6797	55	-0.850037	2.51356	0.735227	AA
627.5	ACE2	Premature menopause and other ovarian failure Female genitourinary	5915	15	-2.27592	6.74684	0.735868	AA
596.5	ACE2	Functional disorders of bladder Both genitourinary	6528	62	-1.69445	5.02386	0.735905	EA
117.4	ACE2	Aspergillosis Both infectious diseases	6023	19	0.678991	2.01361	0.735965	AA
90	ACE2	Sexually transmitted infections (not HIV or hepatitis) infectious diseases	7989	108	-0.558707	1.65733	0.736032	AA
611	TMPRSS2	Abnormal findings on mammogram or breast exam	6959	285	0.35729	1.05993	0.73605	AA
701.4	ACE2	Keloid scar Both dermatologic	7379	80	-0.674701	2.01254	0.737437	AA
350.1	ACE2	Abnormal involuntary movements Both nEAological	6399	110	0.714694	2.13187	0.737442	EA
947	ACE2	Urticaria Both dermatologic	6024	152	-0.431962	1.28864	0.737469	AA
240	ACE2	Simple and unspecified goiter endocrine/metabolic	6714	217	-0.426895	1.27655	0.738068	AA
361.1	ACE2	Retinal detachment with retinal defect Both sense organs	6757	15	0.871846	2.61012	0.738361	AA
709	ACE2	Diffuse diseases of connective tissue dermatologic	5983	73	1.01058	3.02839	0.738604	EA
418.1	ACE2	Precordial pain Both circulatory system	4736	172	-0.388932	1.16679	0.738881	AA
401.2	TMPRSS2	Hypertensive heart and/or renal disease	3670	1016	-0.285068	0.855651	0.739014	AA
280.2	ACE2	Iron deficiency anemia secondary to blood loss (chronic) Both hematopoietic	4366	73	-1.56549	4.70061	0.739104	EA
704.8	ACE2	Other specified diseases of hair and hair follicles Both dermatologic	7193	58	-0.805541	2.42863	0.740127	AA
244.4	TMPRSS2	Hypothyroidism NOS	6138	905	-0.351801	1.06134	0.74029	EA
395	TMPRSS2	Heart valve disorders	7176	557	-0.347099	1.04752	0.740377	AA
773	ACE2	Pain in limb symptoms	6645	263	-0.621408	1.87962	0.740944	EA
244.2	ACE2	Acquired hypothyroidism Both endocrine/metabolic	6686	189	0.362371	1.0971	0.741175	AA
250.24	ACE2	Type 2 Diabetes	4668	435	-0.22125	0.670114	0.741274	AA
276.6	TMPRSS2	Fluid overload	5372	248	0.343024	1.04116	0.741805	AA
427.21	ACE2	Atrial fibrillation Both circulatory system	4890	728	-0.171641	0.521687	0.742147	AA
681.3	ACE2	Cellulitis and abscess of arm/hand Both dermatologic	6471	95	0.371075	1.13051	0.742733	AA
433.31	TMPRSS2	Transient cerebral ischemia	7350	534	-0.340817	1.03851	0.742777	AA
252	ACE2	Disorders of parathyroid gland endocrine/metabolic	6961	114	0.406218	1.24262	0.743741	AA
550.2	ACE2	Diaphragmatic hernia Both digestive	7109	176	-0.43887	1.34252	0.743743	AA
743.12	ACE2	Senile osteoporosis Both musculoskeletal	7340	4	1.39511	4.26988	0.74387	AA
381.9	ACE2	Otorrhea Both sense organs	7201	6	1.34435	4.11869	0.744121	AA
293.1	ACE2	Swelling, mass, or lump in head and neck [Space-occupying lesion, intracranial NOS] Both mental disorders	7612	281	-0.323843	0.993883	0.744548	AA
704.11	ACE2	Alopecia Areata Both dermatologic	7151	16	-2.24666	6.91494	0.745257	AA
530.1	ACE2	Esophagitis, GERD and related diseases digestive	6154	1644	-0.131197	0.404598	0.745738	AA
411.2	ACE2	Myocardial infarction Both circulatory system	3891	901	0.273301	0.844961	0.746356	EA
218.1	ACE2	Uterine leiomyoma Female neoplasms	6570	33	1.22108	3.77654	0.746443	EA
512	TMPRSS2	Other symptoms of respiratory system	5944	2488	-0.17508	0.542118	0.746729	AA
202.2	ACE2	Non-Hodgkins lymphoma Both neoplasms	7927	67	0.490539	1.52273	0.747344	AA
520.2	ACE2	Disturbances in tooth eruption Both digestive	7060	29	-1.30219	4.04866	0.747729	AA
696.42	ACE2	Psoriatic arthropathy Both dermatologic	5900	28	1.02122	3.17735	0.747902	EA
389.4	ACE2	Tinnitus Both sense organs	7390	190	-0.384727	1.20031	0.748572	AA
284	ACE2	Aplastic anemia hematopoietic	4331	38	0.823213	2.56866	0.748602	EA
440.21	ACE2	Atherosclerosis of native arteries of the extremities with ulceration or gangrene Both circulatory system	6699	48	-0.889827	2.78258	0.749131	AA
599	TMPRSS2	Other symptoms/disorders or the urinary system	6306	1238	0.209673	0.658552	0.750193	AA
70.2	ACE2	Viral hepatitis B Both infectious diseases	5916	16	1.0321	3.24893	0.750732	EA
345.3	ACE2	Convulsions Both nEAological	6088	62	0.967544	3.04648	0.750793	EA
585.32	TMPRSS2	End stage renal disease	5518	626	0.246127	0.775563	0.750976	AA
386.9	TMPRSS2	Dizziness and giddiness (Light-headedness and vertigo)	7020	1055	-0.241641	0.76338	0.751592	AA
621	ACE2	Endometrial hyperplasia Female genitourinary	6838	8	1.59663	5.06313	0.752501	EA
502	ACE2	Postinflammatory pulmonary fibrosis Both respiratory	5262	167	0.549331	1.74314	0.752656	EA
694.1	ACE2	Vitiligo Both dermatologic	6370	17	-2.04808	6.50314	0.752809	AA
327.4	ACE2	Insomnia Both nEAological	5121	283	0.435783	1.38586	0.753179	EA
276.5	TMPRSS2	Hypovolemia	5561	437	-0.325594	1.03875	0.753942	AA
189	ACE2	Cancer of urinary organs (incl. kidney and bladder) neoplasms	8048	145	0.329626	1.05423	0.754531	AA
510.2	ACE2	Lung transplant Both respiratory	6436	133	-1.10003	3.52581	0.755045	EA
800.4	ACE2	Fracture of patella Both injuries & poisonings	7244	10	0.813612	2.61459	0.755663	AA
306	TMPRSS2	Other mental disorder	4718	437	0.337723	1.0859	0.755796	EA
364.41	ACE2	Keratoconus Both sense organs	6758	16	-2.0264	6.52218	0.756034	AA
184	ACE2	Cancer of other female genital organs Female neoplasms	6337	19	-3.50691	11.2952	0.756197	EA
614.5	ACE2	Inflammatory disease of cervix, vagina, and vulva Female genitourinary	7190	445	-0.263347	0.8487	0.756337	AA
260	ACE2	Protein-calorie malnutrition endocrine/metabolic	5712	240	0.234074	0.755314	0.756635	AA
[truncated: 4,396 more rows]
