# Supplementary material for: Impact of natural selection on global patterns of genetic variation, and association with clinical phenotypes, at genes involved in SARS-CoV-2 infection
Source: Res Sq. 2021 Jul 27:rs.3.rs-673011. Preprint. [Version 1] doi: 10.21203/rs.3.rs-673011/v1 (PMC8328070; doi:10.21203/rs.3.rs-673011/v1)
Supplement: Supplement 10 [file 88cceecbf291c00c8cfe8c90.xlsx]

## Sheet: AFR
Phecode	phenotype	Gene	CHROM	POS	ID	REF	ALT	A1	CASE_ALLELE_CT	CTRL_ALLELE_CT	TEST	OBS_CT	OR	SE	L95	U95	Z_STAT	P	category
260.2	severe protein-calorie malnutrition	LY6E	8	143018292	chr8:143018292:C:A	C	A	A	252	11776	ADD	6014	1.99459	0.163261	1.44839	2.74677	4.22905	2.34678e-05	endocrine/metabolic
610.8	Other specified benign mammary dysplasias	TMPRSS2	21	41508700	chr21:41508700:G:A	G	A	A	46	14402	ADD	7224	6.17535	0.445414	2.57944	14.7842	4.08736	4.36318e-05	genitourinary
250.2	Type 2 diabetes	ACE2	X	15674766	chrX:15674766:C:G	C	G	G	5468	9124	ADD	7296	1.12619	0.0309462	1.05992	1.19661	3.84031	0.000122879	endocrine/metabolic
255.2	Adrenal hypofunction	TMPRSS2	21	41508701	chr21:41508701:T:G	G	T	T	42	14812	ADD	7427	4.20864	0.38847	1.96551	9.01173	3.69949	0.000216035	endocrine/metabolic
1008	Crushing or internal injury to organs	TMPRSS2	21	41508701	chr21:41508701:T:G	G	T	T	36	17628	ADD	8832	4.47931	0.408172	2.01268	9.96891	3.67362	0.00023914	NULL
394.4	Acute rheumatic heart disease	LY6E	8	143018261	chr8:143018261:G:A	G	A	A	18	14322	ADD	7170	9.31862	0.614797	2.79277	31.0933	3.63049	0.00028288	circulatory system
153.3	Malignant neoplasm of rectum, rectosigmoid junction, and anus	DPP4	2	162073469	chr2:162073469:A:G	A	G	G	144	13516	ADD	6830	1.8176	0.170254	1.3019	2.53757	3.50954	0.000448877	neoplasms
505	Other pulmonary inflamation or edema	DPP4	2	162073469	chr2:162073469:A:G	A	G	G	42	14020	ADD	7031	2.41823	0.252577	1.47402	3.96727	3.49611	0.0004721	respiratory
596.1	Bladder neck obstruction	DPP4	2	162074215	chr2:162074215:T:G	G	T	T	56	16060	ADD	8058	2.33386	0.242709	1.45037	3.75551	3.49192	0.000479556	genitourinary
803.2	Fracture of radius and ulna	TMPRSS2	21	41508700	chr21:41508700:G:A	G	A	A	156	15624	ADD	7890	3.22623	0.340604	1.6549	6.28952	3.43893	0.000584019	injuries & poisonings
800.1	Fracture of neck of femur	TMPRSS2	21	41508700	chr21:41508700:G:A	G	A	A	48	15624	ADD	7836	5.32359	0.488558	2.04335	13.8697	3.42262	0.000620202	injuries & poisonings
758	Chromosomal anomalies and genetic disorders	TMPRSS2	21	41508700	chr21:41508700:G:A	G	A	A	16	17180	ADD	8598	6.68568	0.555867	2.24901	19.8747	3.41803	0.000630761	congenital anomalies
285.1	Acute posthemorrhagic anemia	LY6E	8	143018292	chr8:143018292:C:A	C	A	A	374	8724	ADD	4549	1.61935	0.141248	1.22775	2.13585	3.41259	0.000643479	hematopoietic
345.11	Generalized convulsive epilepsy	LY6E	8	143018261	chr8:143018261:G:A	G	A	A	82	14406	ADD	7244	4.33567	0.430781	1.86369	10.0864	3.40515	0.00066127	neurological
252.2	Hypoparathyroidism	DPP4	2	162073199	chr2:162073199:T:G	T	G	G	40	14812	ADD	7426	2.63957	0.286079	1.50668	4.62428	3.39281	0.000691784	endocrine/metabolic
930	Allergic reaction to food	DPP4	2	162074215	chr2:162074215:T:G	G	T	T	418	12656	ADD	6537	0.680232	0.113836	0.544202	0.850265	-3.38488	0.000712096	injuries & poisonings
500.1	Extrinsic allergic alveolitis	TMPRSS2	21	41508700	chr21:41508700:G:A	G	A	A	8	14020	ADD	7014	8.12582	0.621352	2.4042	27.464	3.37175	0.000746911	respiratory
401	Hypertension	ACE2	X	15675734	chrX:15675734:C:T	C	T	T	8712	5666	ADD	7189	1.13188	0.0372575	1.05218	1.21763	3.32505	0.000884027	circulatory system
610.2	Fibroadenosis of breast	TMPRSS2	21	41508700	chr21:41508700:G:A	G	A	A	6	14402	ADD	7204	7.30395	0.599089	2.25742	23.6322	3.31906	0.000903202	genitourinary
070.9	Hepatitis NOS	LY6E	8	143018292	chr8:143018292:C:A	C	A	A	74	12338	ADD	6206	2.41091	0.265429	1.433	4.05615	3.3154	0.000915105	infectious diseases
255.21	Glucocorticoid deficiency	TMPRSS2	21	41508701	chr21:41508701:T:G	G	T	T	102	14812	ADD	7457	2.75745	0.309416	1.5036	5.05688	3.27813	0.00104499	endocrine/metabolic
556.1	Ulceration of intestine	ACE2	X	15674316	chrX:15674316:A:C	C	A	A	24	12050	ADD	6037	2.73216	0.307232	1.4962	4.98911	3.27145	0.00106999	digestive
556.1	Ulceration of intestine	ACE2	X	15674699	chrX:15674699:T:C	C	T	T	24	12050	ADD	6037	2.73216	0.307232	1.4962	4.98911	3.27145	0.00106999	digestive
556.1	Ulceration of intestine	ACE2	X	15675338	chrX:15675338:T:A	A	T	T	24	12050	ADD	6037	2.73216	0.307232	1.4962	4.98911	3.27145	0.00106999	digestive
556.1	Ulceration of intestine	ACE2	X	15675244	chrX:15675244:A:G	G	A	A	24	12050	ADD	6037	2.72563	0.306644	1.49434	4.97144	3.26991	0.00107582	digestive
242.2	Toxic multinodular goiter	TMPRSS2	21	41508701	chr21:41508701:T:G	G	T	T	26	14014	ADD	7020	4.22242	0.44227	1.7746	10.0467	3.25685	0.00112656	endocrine/metabolic
345.11	Generalized convulsive epilepsy	ACE2	X	15675244	chrX:15675244:A:G	G	A	A	82	14406	ADD	7244	1.79043	0.179243	1.26005	2.54407	3.24954	0.0011559	neurological
374	Other disorders of eyelids	LY6E	8	143017718	chr8:143017718:G:C	C	G	G	240	14556	ADD	7398	1.61389	0.147367	1.20902	2.15433	3.248	0.00116219	sense organs
345.11	Generalized convulsive epilepsy	ACE2	X	15674316	chrX:15674316:A:C	C	A	A	82	14406	ADD	7244	1.78971	0.179238	1.25954	2.54302	3.24735	0.00116483	neurological
345.11	Generalized convulsive epilepsy	ACE2	X	15674699	chrX:15674699:T:C	C	T	T	82	14406	ADD	7244	1.78971	0.179238	1.25954	2.54302	3.24735	0.00116483	neurological
345.11	Generalized convulsive epilepsy	ACE2	X	15675338	chrX:15675338:T:A	A	T	T	82	14406	ADD	7244	1.78971	0.179238	1.25954	2.54302	3.24735	0.00116483	neurological
601.8	Other inflammatory disorders of male genital organs	TMPRSS2	21	41508700	chr21:41508700:G:A	G	A	A	22	15234	ADD	7628	7.56812	0.624973	2.22336	25.7612	3.23845	0.00120181	genitourinary
415	Pulmonary heart disease	LY6E	8	143018261	chr8:143018261:G:A	G	A	A	1448	14402	ADD	7925	0.228039	0.457324	0.0930538	0.558836	-3.23236	0.00122771	circulatory system
401	Hypertension	ACE2	X	15674766	chrX:15674766:C:G	C	G	G	8712	5666	ADD	7189	1.12642	0.0372012	1.04721	1.21162	3.20005	0.00137404	circulatory system
333.2	Myoclonus	LY6E	8	143018261	chr8:143018261:G:A	G	A	A	18	14406	ADD	7212	7.01704	0.614662	2.10355	23.4075	3.16978	0.00152556	neurological
252.2	Hypoparathyroidism	DPP4	2	162073222	chr2:162073222:G:A	G	A	A	40	14812	ADD	7426	2.51727	0.291403	1.42196	4.45628	3.16803	0.00153476	endocrine/metabolic
364.4	Corneal degenerations	LY6E	8	143018292	chr8:143018292:C:A	C	A	A	52	14542	ADD	7297	2.60875	0.304665	1.43582	4.73983	3.1473	0.00164787	sense organs
041.12	Methicillin resistant Staphylococcus aureus	TMPRSS2	21	41508700	chr21:41508700:G:A	G	A	A	108	13970	ADD	7039	3.50367	0.400279	1.59884	7.67788	3.13234	0.00173417	infectious diseases
841	Sprains and strains of back and neck	LY6E	8	143017718	chr8:143017718:G:C	C	G	G	416	13340	ADD	6878	1.44246	0.117108	1.14663	1.81463	3.12832	0.0017581	injuries & poisonings
599.3	Dysuria	TMPRSS2	21	41508700	chr21:41508700:G:A	G	A	A	920	10860	ADD	5890	1.88716	0.203132	1.26737	2.81006	3.1264	0.00176958	genitourinary
522	Diseases of pulp and periapical tissues	LY6E	8	143018292	chr8:143018292:C:A	C	A	A	76	15118	ADD	7597	2.27996	0.264299	1.35817	3.82735	3.11828	0.0018191	digestive
743.1	Osteoporosis	TMPRSS2	21	41508700	chr21:41508700:G:A	G	A	A	366	15886	ADD	8126	2.36467	0.276251	1.37602	4.06365	3.11542	0.00183681	musculoskeletal
857	Mechanical complication of unspecified genitourinary device, implant, and graft	LY6E	8	143017718	chr8:143017718:G:C	C	G	G	108	14420	ADD	7264	1.88634	0.204249	1.26404	2.81499	3.10717	0.00188885	injuries & poisonings
279.11	Deficiency of humoral immunity	ACE2	X	15675244	chrX:15675244:A:G	G	A	A	28	15946	ADD	7987	2.62458	0.312716	1.42192	4.84446	3.08561	0.00203132	endocrine/metabolic
401	Hypertension	ACE2	X	15675244	chrX:15675244:A:G	G	A	A	8712	5666	ADD	7189	0.882285	0.0406582	0.814706	0.955471	-3.08031	0.00206788	circulatory system
401.1	Essential hypertension	ACE2	X	15675734	chrX:15675734:C:T	C	T	T	10554	5666	ADD	8110	1.11286	0.0348194	1.03945	1.19146	3.07109	0.0021328	circulatory system
279.11	Deficiency of humoral immunity	ACE2	X	15674316	chrX:15674316:A:C	C	A	A	28	15946	ADD	7987	2.60524	0.311885	1.41375	4.80092	3.07013	0.00213968	endocrine/metabolic
279.11	Deficiency of humoral immunity	ACE2	X	15674699	chrX:15674699:T:C	C	T	T	28	15946	ADD	7987	2.60524	0.311885	1.41375	4.80092	3.07013	0.00213968	endocrine/metabolic
279.11	Deficiency of humoral immunity	ACE2	X	15675338	chrX:15675338:T:A	A	T	T	28	15946	ADD	7987	2.60524	0.311885	1.41375	4.80092	3.07013	0.00213968	endocrine/metabolic
401	Hypertension	ACE2	X	15674316	chrX:15674316:A:C	C	A	A	8712	5666	ADD	7189	0.882677	0.0406538	0.815075	0.955887	-3.06971	0.00214269	circulatory system
401	Hypertension	ACE2	X	15674699	chrX:15674699:T:C	C	T	T	8712	5666	ADD	7189	0.882677	0.0406538	0.815075	0.955887	-3.06971	0.00214269	circulatory system
401	Hypertension	ACE2	X	15675338	chrX:15675338:T:A	A	T	T	8712	5666	ADD	7189	0.882677	0.0406538	0.815075	0.955887	-3.06971	0.00214269	circulatory system
433.12	Cerebral atherosclerosis	LY6E	8	143018292	chr8:143018292:C:A	C	A	A	26	14764	ADD	7395	2.8389	0.342977	1.44946	5.56023	3.04223	0.00234831	circulatory system
711.2	Reiter's disease	LY6E	8	143018261	chr8:143018261:G:A	G	A	A	4	14484	ADD	7244	10.6245	0.777083	2.31661	48.7262	3.04107	0.00235743	musculoskeletal
364	Corneal opacity and other disorders of cornea	LY6E	8	143018292	chr8:143018292:C:A	C	A	A	78	14542	ADD	7310	2.24688	0.266211	1.33346	3.78598	3.04098	0.00235807	sense organs
117	Mycoses	LY6E	8	143018292	chr8:143018292:C:A	C	A	A	102	12868	ADD	6485	2.15007	0.251778	1.31262	3.52181	3.04038	0.00236279	infectious diseases
728.1	Muscular calcification and ossification	TMPRSS2	21	41508701	chr21:41508701:T:G	G	T	T	6	11508	ADD	5757	6.93842	0.637204	1.99008	24.1908	3.03996	0.00236611	musculoskeletal
153.3	Malignant neoplasm of rectum, rectosigmoid junction, and anus	DPP4	2	162074215	chr2:162074215:T:G	G	T	T	144	13516	ADD	6830	0.549296	0.198587	0.372194	0.810669	-3.01691	0.00255366	neoplasms
255.2	Adrenal hypofunction	TMPRSS2	21	41508700	chr21:41508700:G:A	G	A	A	42	14812	ADD	7427	4.9269	0.528627	1.74826	13.8849	3.0167	0.00255542	endocrine/metabolic
514.1	Abnormal results of function study of pulmonary system	DPP4	2	162073222	chr2:162073222:G:A	G	A	A	166	15268	ADD	7717	1.65714	0.167825	1.19263	2.30256	3.00965	0.00261552	respiratory
724.8	Other symptoms referable to back	TMPRSS2	21	41508700	chr21:41508700:G:A	G	A	A	152	13702	ADD	6927	3.07502	0.374542	1.47584	6.40706	2.99916	0.00270721	musculoskeletal
575.1	Cholangitis	TMPRSS2	21	41508700	chr21:41508700:G:A	G	A	A	42	16340	ADD	8191	5.24109	0.552592	1.77441	15.4806	2.99775	0.00271983	digestive
252.2	Hypoparathyroidism	DPP4	2	162073469	chr2:162073469:A:G	A	G	G	40	14812	ADD	7426	2.37513	0.28877	1.34861	4.18301	2.99565	0.00273857	endocrine/metabolic
602	Other disorders of prostate	LY6E	8	143018292	chr8:143018292:C:A	C	A	A	106	15234	ADD	7670	1.88643	0.212167	1.24464	2.85915	2.99144	0.00277667	genitourinary
269	Proteinuria	LY6E	8	143018292	chr8:143018292:C:A	C	A	A	1150	15522	ADD	8336	1.30523	0.089447	1.09534	1.55534	2.97809	0.00290054	endocrine/metabolic
278.3	Localized adiposity	LY6E	8	143018261	chr8:143018261:G:A	G	A	A	134	8180	ADD	4157	3.38202	0.409212	1.51654	7.5422	2.97761	0.00290506	endocrine/metabolic
872	Traumatic amputation	TMPRSS2	21	41508700	chr21:41508700:G:A	G	A	A	24	15452	ADD	7738	6.48791	0.629725	1.88835	22.2909	2.96946	0.00298328	injuries & poisonings
556	Ulceration of the lower GI tract	LY6E	8	143018261	chr8:143018261:G:A	G	A	A	50	12050	ADD	6050	4.86052	0.533408	1.70862	13.8268	2.96423	0.00303439	digestive
464	Acute sinusitis	ACE2	X	15674316	chrX:15674316:A:C	C	A	A	752	11522	ADD	6137	0.785439	0.0816042	0.669347	0.921668	-2.95955	0.00308086	respiratory
464	Acute sinusitis	ACE2	X	15674699	chrX:15674699:T:C	C	T	T	752	11522	ADD	6137	0.785439	0.0816042	0.669347	0.921668	-2.95955	0.00308086	respiratory
464	Acute sinusitis	ACE2	X	15675338	chrX:15675338:T:A	A	T	T	752	11522	ADD	6137	0.785439	0.0816042	0.669347	0.921668	-2.95955	0.00308086	respiratory
627.1	Postmenopausal bleeding	ACE2	X	15674766	chrX:15674766:C:G	C	G	G	440	12686	ADD	6563	0.742384	0.100684	0.609434	0.904338	-2.95866	0.00308979	genitourinary
562.2	Diverticulitis	LY6E	8	143018292	chr8:143018292:C:A	C	A	A	252	12050	ADD	6151	0.428598	0.286478	0.244456	0.751452	-2.95742	0.00310228	digestive
949	Allergies, other	LY6E	8	143018292	chr8:143018292:C:A	C	A	A	724	12656	ADD	6690	1.38249	0.109581	1.11529	1.71371	2.95567	0.00311988	injuries & poisonings
464	Acute sinusitis	ACE2	X	15675244	chrX:15675244:A:G	G	A	A	752	11522	ADD	6137	0.785672	0.0816114	0.669535	0.921953	-2.95566	0.00311996	respiratory
334.1	Spinocerebellar disease	LY6E	8	143018261	chr8:143018261:G:A	G	A	A	2	14406	ADD	7204	10.2948	0.789722	2.18979	48.3982	2.95247	0.00315239	neurological
259.2	Carcinoid syndrome	TMPRSS2	21	41508701	chr21:41508701:T:G	G	T	T	18	14812	ADD	7415	4.10436	0.478593	1.60645	10.4864	2.95042	0.00317344	endocrine/metabolic
358	Myoneural disorders	LY6E	8	143018261	chr8:143018261:G:A	G	A	A	26	15942	ADD	7984	5.96115	0.60573	1.81858	19.5402	2.94729	0.00320572	neurological
327.5	Parasomnia	LY6E	8	143018261	chr8:143018261:G:A	G	A	A	58	10772	ADD	5415	4.91952	0.540869	1.70425	14.2007	2.94565	0.00322274	neurological
367	Disorders of refraction and accommodation; blindness and low vision	DPP4	2	162074215	chr2:162074215:T:G	G	T	T	1292	14070	ADD	7681	0.827482	0.064436	0.729308	0.938873	-2.93884	0.00329441	sense organs
599.8	Other symptoms involving urinary system	LY6E	8	143017718	chr8:143017718:G:C	C	G	G	128	10860	ADD	5494	0.393474	0.318033	0.210963	0.733883	-2.93283	0.00335882	genitourinary
292	Neurological disorders	DPP4	2	162073469	chr2:162073469:A:G	A	G	G	738	14340	ADD	7539	0.756874	0.0950108	0.628276	0.911795	-2.93186	0.00336939	mental disorders
550.5	Ventral hernia	LY6E	8	143018261	chr8:143018261:G:A	G	A	A	404	14972	ADD	7688	2.33864	0.291301	1.32132	4.13923	2.91646	0.00354032	digestive
505	Other pulmonary inflamation or edema	DPP4	2	162073222	chr2:162073222:G:A	G	A	A	42	14020	ADD	7031	2.17105	0.266101	1.28874	3.65742	2.91321	0.00357729	respiratory
149.9	Cancer of of nasal cavities	TMPRSS2	21	41508700	chr21:41508700:G:A	G	A	A	18	17514	ADD	8766	6.17344	0.626567	1.80798	21.0796	2.90513	0.00367103	neoplasms
447	Other disorders of arteries and arterioles	ACE2	X	15675734	chrX:15675734:C:T	C	T	T	544	14400	ADD	7472	0.807397	0.0736446	0.698877	0.932767	-2.90503	0.00367212	circulatory system
246	Other disorders of thyroid	TMPRSS2	21	41508700	chr21:41508700:G:A	G	A	A	210	14014	ADD	7112	2.48218	0.313058	1.34387	4.58467	2.90405	0.00368371	endocrine/metabolic
250.2	Type 2 diabetes	ACE2	X	15675244	chrX:15675244:A:G	G	A	A	5468	9124	ADD	7296	0.906073	0.0340202	0.847628	0.968548	-2.89931	0.00373982	endocrine/metabolic
420.21	Acute pericarditis	ACE2	X	15674316	chrX:15674316:A:C	C	A	A	38	14744	ADD	7391	2.18264	0.269395	1.28728	3.70076	2.89736	0.00376317	circulatory system
420.21	Acute pericarditis	ACE2	X	15674699	chrX:15674699:T:C	C	T	T	38	14744	ADD	7391	2.18264	0.269395	1.28728	3.70076	2.89736	0.00376317	circulatory system
420.21	Acute pericarditis	ACE2	X	15675244	chrX:15675244:A:G	G	A	A	38	14744	ADD	7391	2.18264	0.269395	1.28728	3.70076	2.89736	0.00376317	circulatory system
420.21	Acute pericarditis	ACE2	X	15675338	chrX:15675338:T:A	A	T	T	38	14744	ADD	7391	2.18264	0.269395	1.28728	3.70076	2.89736	0.00376317	circulatory system
736.2	Acquired deformities of finger	LY6E	8	143017718	chr8:143017718:G:C	C	G	G	42	15480	ADD	7761	2.42953	0.306641	1.33202	4.43134	2.89491	0.00379265	musculoskeletal
562.1	Diverticulosis	DPP4	2	162074215	chr2:162074215:T:G	G	T	T	794	12050	ADD	6422	0.783747	0.0842275	0.664479	0.924422	-2.89299	0.0038159	digestive
721.8	Other allied disorders of spine	TMPRSS2	21	41508701	chr21:41508701:T:G	G	T	T	16	13702	ADD	6859	3.98032	0.47788	1.56007	10.1552	2.8906	0.00384507	musculoskeletal
132	Infestation (lice, mites)	LY6E	8	143017718	chr8:143017718:G:C	C	G	G	44	15752	ADD	7898	2.41797	0.306056	1.3272	4.40521	2.88486	0.00391588	infectious diseases
619.3	Noninflammatory disorders of cervix	DPP4	2	162074215	chr2:162074215:T:G	G	T	T	90	14484	ADD	7287	1.80424	0.205035	1.20717	2.69663	2.87824	0.00399902	genitourinary
818.1	Subdural hemorrhage (injury)	LY6E	8	143018292	chr8:143018292:C:A	C	A	A	12	17028	ADD	8520	3.2051	0.406018	1.44624	7.10306	2.8687	0.0041216	injuries & poisonings
284	Aplastic anemia	DPP4	2	162074215	chr2:162074215:T:G	G	T	T	62	8724	ADD	4393	2.01163	0.243766	1.24754	3.24371	2.86728	0.00414013	hematopoietic
250.2	Type 2 diabetes	ACE2	X	15674316	chrX:15674316:A:C	C	A	A	5468	9124	ADD	7296	0.907144	0.0340085	0.848649	0.969671	-2.86558	0.00416249	endocrine/metabolic
250.2	Type 2 diabetes	ACE2	X	15674699	chrX:15674699:T:C	C	T	T	5468	9124	ADD	7296	0.907144	0.0340085	0.848649	0.969671	-2.86558	0.00416249	endocrine/metabolic
250.2	Type 2 diabetes	ACE2	X	15675338	chrX:15675338:T:A	A	T	T	5468	9124	ADD	7296	0.907144	0.0340085	0.848649	0.969671	-2.86558	0.00416249	endocrine/metabolic
277.5	Other disorders of lipoid metabolism	TMPRSS2	21	41508700	chr21:41508700:G:A	G	A	A	124	16250	ADD	8187	3.15539	0.401664	1.43601	6.93346	2.86088	0.00422469	endocrine/metabolic
250	Diabetes mellitus	ACE2	X	15674766	chrX:15674766:C:G	C	G	G	4350	9124	ADD	6737	1.10053	0.0335394	1.03051	1.17531	2.85609	0.0042889	endocrine/metabolic
370.1	Corneal ulcer	DPP4	2	162073199	chr2:162073199:T:G	T	G	G	40	14556	ADD	7298	2.34328	0.298847	1.3045	4.20923	2.84946	0.00437939	sense organs
180.1	Cervical cancer	TMPRSS2	21	41508700	chr21:41508700:G:A	G	A	A	84	12432	ADD	6258	3.56037	0.447588	1.48084	8.56016	2.83713	0.00455212	neoplasms
625.1	Dyspareunia	LY6E	8	143017718	chr8:143017718:G:C	C	G	G	50	14668	ADD	7359	2.2974	0.293183	1.29324	4.08126	2.83706	0.00455315	genitourinary
401.1	Essential hypertension	ACE2	X	15674766	chrX:15674766:C:G	C	G	G	10554	5666	ADD	8110	1.10338	0.0347626	1.0307	1.18117	2.82993	0.00465575	circulatory system
320	Meningitis	TMPRSS2	21	41508700	chr21:41508700:G:A	G	A	A	64	17284	ADD	8674	3.8114	0.473169	1.50773	9.6349	2.82773	0.00468787	neurological
618.1	Prolapse of vaginal walls	TMPRSS2	21	41508701	chr21:41508701:T:G	G	T	T	114	17318	ADD	8716	2.29405	0.294261	1.28863	4.08393	2.82171	0.0047769	genitourinary
696.41	Psoriasis vulgaris	DPP4	2	162074215	chr2:162074215:T:G	G	T	T	144	13140	ADD	6642	0.566033	0.201725	0.381183	0.840526	-2.82117	0.00478487	dermatologic
250.2	Type 2 diabetes	ACE2	X	15675734	chrX:15675734:C:T	C	T	T	5468	9124	ADD	7296	1.09094	0.030928	1.02678	1.15912	2.8144	0.00488683	endocrine/metabolic
352.1	Trigeminal nerve disorders [CN5]	TMPRSS2	21	41508701	chr21:41508701:T:G	G	T	T	70	14182	ADD	7126	2.72509	0.356454	1.35508	5.48018	2.81242	0.00491699	neurological
277.7	Dysmetabolic syndrome X	ACE2	X	15675734	chrX:15675734:C:T	C	T	T	126	16250	ADD	8188	1.56088	0.158379	1.14435	2.12903	2.8113	0.0049342	endocrine/metabolic
830	Dislocation	DPP4	2	162074215	chr2:162074215:T:G	G	T	T	324	16552	ADD	8438	1.37695	0.113791	1.10169	1.72098	2.811	0.00493871	injuries & poisonings
447	Other disorders of arteries and arterioles	ACE2	X	15674766	chrX:15674766:C:G	C	G	G	544	14400	ADD	7472	0.813916	0.0733597	0.704914	0.939775	-2.80669	0.00500541	circulatory system
333	Extrapyramidal disease and abnormal movement disorders	ACE2	X	15674766	chrX:15674766:C:G	C	G	G	94	14406	ADD	7250	0.595461	0.184732	0.414581	0.85526	-2.80633	0.00501101	neurological
714.2	Juvenile rheumatoid arthritis	LY6E	8	143018292	chr8:143018292:C:A	C	A	A	18	14934	ADD	7476	3.26917	0.422116	1.42933	7.47728	2.80619	0.00501309	musculoskeletal
521	Diseases of hard tissues of teeth	LY6E	8	143018261	chr8:143018261:G:A	G	A	A	176	15118	ADD	7647	3.07135	0.40006	1.40216	6.72761	2.80487	0.00503365	digestive
585.31	Renal dialysis	LY6E	8	143018292	chr8:143018292:C:A	C	A	A	1212	10540	ADD	5876	1.28977	0.0907517	1.07961	1.54085	2.80398	0.00504753	genitourinary
512.9	Other dypnea	ACE2	X	15674316	chrX:15674316:A:C	C	A	A	2946	7326	ADD	5136	0.884359	0.0438579	0.811515	0.963742	-2.80205	0.00507789	respiratory
512.9	Other dypnea	ACE2	X	15674699	chrX:15674699:T:C	C	T	T	2946	7326	ADD	5136	0.884359	0.0438579	0.811515	0.963742	-2.80205	0.00507789	respiratory
512.9	Other dypnea	ACE2	X	15675244	chrX:15675244:A:G	G	A	A	2946	7326	ADD	5136	0.884359	0.0438579	0.811515	0.963742	-2.80205	0.00507789	respiratory
512.9	Other dypnea	ACE2	X	15675338	chrX:15675338:T:A	A	T	T	2946	7326	ADD	5136	0.884359	0.0438579	0.811515	0.963742	-2.80205	0.00507789	respiratory
1002	Symptoms concerning nutrition, metabolism, and development	LY6E	8	143018292	chr8:143018292:C:A	C	A	A	710	16368	ADD	8539	1.36077	0.110024	1.09681	1.68825	2.79987	0.00511234	NULL
327.72	Sleep related leg cramps	TMPRSS2	21	41508700	chr21:41508700:G:A	G	A	A	38	10772	ADD	5405	4.42094	0.531016	1.5614	12.5175	2.79907	0.00512497	neurological
362.22	Macular degeneration, wet	LY6E	8	143018292	chr8:143018292:C:A	C	A	A	14	13982	ADD	6998	3.03549	0.397093	1.39387	6.61051	2.79625	0.00516994	sense organs
530.3	Stricture and stenosis of esophagus	LY6E	8	143017718	chr8:143017718:G:C	C	G	G	88	9678	ADD	4883	1.89919	0.229461	1.2113	2.97774	2.79537	0.00518402	digestive
696.4	Psoriasis	LY6E	8	143018261	chr8:143018261:G:A	G	A	A	116	13140	ADD	6628	3.41632	0.440311	1.44134	8.0975	2.79022	0.00526724	dermatologic
521.1	Dental caries	DPP4	2	162074215	chr2:162074215:T:G	G	T	T	270	15118	ADD	7694	1.4163	0.124939	1.10868	1.80927	2.78577	0.00534014	digestive
242	Thyrotoxicosis with or without goiter	LY6E	8	143017718	chr8:143017718:G:C	C	G	G	520	14014	ADD	7267	1.35213	0.108532	1.09304	1.67264	2.77968	0.00544118	endocrine/metabolic
191	Manlignant and unknown neoplasms of brain and nervous system	LY6E	8	143018261	chr8:143018261:G:A	G	A	A	54	17442	ADD	8748	4.36692	0.530494	1.54389	12.3519	2.77865	0.00545855	neoplasms
440.9	Atherosclerosis of aorta	TMPRSS2	21	41508700	chr21:41508700:G:A	G	A	A	52	14400	ADD	7226	3.74959	0.475681	1.47599	9.52544	2.77843	0.00546225	circulatory system
458.9	Hypotension NOS	LY6E	8	143018292	chr8:143018292:C:A	C	A	A	540	12600	ADD	6570	1.40897	0.123554	1.10594	1.79503	2.77496	0.0055209	circulatory system
575.1	Cholangitis	ACE2	X	15675244	chrX:15675244:A:G	G	A	A	42	16340	ADD	8191	1.87716	0.227288	1.20235	2.93068	2.77075	0.00559278	digestive
575.1	Cholangitis	ACE2	X	15674316	chrX:15674316:A:C	C	A	A	42	16340	ADD	8191	1.87607	0.227296	1.20164	2.92904	2.76812	0.00563816	digestive
575.1	Cholangitis	ACE2	X	15674699	chrX:15674699:T:C	C	T	T	42	16340	ADD	8191	1.87607	0.227296	1.20164	2.92904	2.76812	0.00563816	digestive
575.1	Cholangitis	ACE2	X	15675338	chrX:15675338:T:A	A	T	T	42	16340	ADD	8191	1.87607	0.227296	1.20164	2.92904	2.76812	0.00563816	digestive
556.1	Ulceration of intestine	LY6E	8	143018261	chr8:143018261:G:A	G	A	A	24	12050	ADD	6037	5.50703	0.617491	1.64176	18.4726	2.76284	0.00573016	digestive
170.1	Bone cancer	ACE2	X	15675734	chrX:15675734:C:T	C	T	T	32	17588	ADD	8810	2.49075	0.331085	1.3017	4.76596	2.75635	0.00584512	neoplasms
433.12	Cerebral atherosclerosis	TMPRSS2	21	41508701	chr21:41508701:T:G	G	T	T	26	14764	ADD	7395	3.29333	0.432569	1.41069	7.68845	2.75539	0.00586214	circulatory system
333.4	Torsion dystonia	TMPRSS2	21	41508701	chr21:41508701:T:G	G	T	T	54	14406	ADD	7230	2.80719	0.374928	1.34627	5.85345	2.75302	0.00590484	neurological
379.2	Disorders of vitreous body	LY6E	8	143017718	chr8:143017718:G:C	C	G	G	692	14222	ADD	7457	1.30581	0.0970707	1.07957	1.57945	2.74872	0.00598276	sense organs
270.31	Polyclonal hypergammaglobulinemia	LY6E	8	143018292	chr8:143018292:C:A	C	A	A	12	15522	ADD	7767	2.92379	0.391399	1.35765	6.2966	2.74114	0.00612263	endocrine/metabolic
748	Anomalies of respiratory system, congenital	LY6E	8	143017718	chr8:143017718:G:C	C	G	G	22	17568	ADD	8795	2.81766	0.37794	1.34334	5.91006	2.74093	0.00612661	congenital anomalies
525	Other diseases of the teeth and supporting structures	ACE2	X	15675734	chrX:15675734:C:T	C	T	T	320	15118	ADD	7719	1.31001	0.098556	1.0799	1.58915	2.73991	0.0061456	digestive
443.7	Peripheral angiopathy in diseases classified elsewhere	LY6E	8	143017718	chr8:143017718:G:C	C	G	G	12	14400	ADD	7206	3.02907	0.406202	1.36631	6.71536	2.72834	0.00636545	circulatory system
1010.1	NA	LY6E	8	143018292	chr8:143018292:C:A	C	A	A	58	17648	ADD	8853	2.33137	0.310523	1.26851	4.28478	2.7259	0.00641257	NA
612.3	Congenital anomalies of breast	LY6E	8	143018261	chr8:143018261:G:A	G	A	A	6	14402	ADD	7204	8.16709	0.773557	1.79314	37.1981	2.71488	0.00663002	genitourinary
170.1	Bone cancer	ACE2	X	15674766	chrX:15674766:C:G	C	G	G	32	17588	ADD	8810	2.46211	0.331887	1.28471	4.71856	2.71483	0.00663099	neoplasms
275.53	Disorders of phosphorus metabolism	LY6E	8	143018292	chr8:143018292:C:A	C	A	A	466	14386	ADD	7426	1.42821	0.131703	1.10328	1.84883	2.70624	0.00680489	endocrine/metabolic
295.3	Psychosis	LY6E	8	143018261	chr8:143018261:G:A	G	A	A	82	7042	ADD	3562	3.54759	0.468147	1.41725	8.88018	2.70485	0.00683345	mental disorders
696.4	Psoriasis	DPP4	2	162073469	chr2:162073469:A:G	A	G	G	116	13140	ADD	6628	1.6642	0.188445	1.15028	2.40775	2.7029	0.00687379	dermatologic
458	Hypotension	LY6E	8	143018292	chr8:143018292:C:A	C	A	A	418	12600	ADD	6509	1.45196	0.138326	1.10716	1.90413	2.6959	0.00701993	circulatory system
564	Functional digestive disorders	TMPRSS2	21	41508701	chr21:41508701:T:G	G	T	T	216	12050	ADD	6133	1.9025	0.238583	1.19191	3.03674	2.6958	0.00702201	digestive
333	Extrapyramidal disease and abnormal movement disorders	ACE2	X	15675734	chrX:15675734:C:T	C	T	T	94	14406	ADD	7250	0.608165	0.184604	0.423532	0.873286	-2.69392	0.00706162	neurological
277.7	Dysmetabolic syndrome X	ACE2	X	15674766	chrX:15674766:C:G	C	G	G	126	16250	ADD	8188	1.53043	0.158281	1.12224	2.0871	2.68858	0.00717568	endocrine/metabolic
292	Neurological disorders	DPP4	2	162073199	chr2:162073199:T:G	T	G	G	738	14340	ADD	7539	0.768395	0.0981041	0.633984	0.931303	-2.68542	0.00724383	mental disorders
573.2	Liver replaced by transplant	ACE2	X	15675244	chrX:15675244:A:G	G	A	A	140	14022	ADD	7081	1.41592	0.129622	1.09826	1.82546	2.68304	0.00729565	digestive
720.1	Spinal stenosis of lumbar region	ACE2	X	15675734	chrX:15675734:C:T	C	T	T	644	13702	ADD	7173	0.824517	0.0719903	0.716013	0.949462	-2.68033	0.00735491	musculoskeletal
967	Adverse effects of sedatives or other central nervous system depressants and anesthetics	TMPRSS2	21	41508700	chr21:41508700:G:A	G	A	A	34	12966	ADD	6500	4.12245	0.528848	1.46217	11.6228	2.67836	0.0073983	injuries & poisonings
170.2	Cancer of connective tissue	LY6E	8	143017718	chr8:143017718:G:C	C	G	G	76	17588	ADD	8832	1.92302	0.244267	1.19141	3.10387	2.67697	0.00742917	neoplasms
573.2	Liver replaced by transplant	ACE2	X	15674316	chrX:15674316:A:C	C	A	A	140	14022	ADD	7081	1.41477	0.129622	1.09737	1.82398	2.67678	0.00743343	digestive
573.2	Liver replaced by transplant	ACE2	X	15674699	chrX:15674699:T:C	C	T	T	140	14022	ADD	7081	1.41477	0.129622	1.09737	1.82398	2.67678	0.00743343	digestive
573.2	Liver replaced by transplant	ACE2	X	15675338	chrX:15675338:T:A	A	T	T	140	14022	ADD	7081	1.41477	0.129622	1.09737	1.82398	2.67678	0.00743343	digestive
979	Adverse drug events and drug allergies	DPP4	2	162074215	chr2:162074215:T:G	G	T	T	418	12966	ADD	6692	0.740008	0.112497	0.593579	0.922559	-2.67646	0.00744043	injuries & poisonings
529	Diseases and other conditions of the tongue	DPP4	2	162073469	chr2:162073469:A:G	A	G	G	52	16206	ADD	8129	2.03934	0.266666	1.20921	3.43934	2.67235	0.0075322	digestive
175	Acquired absence of breast	LY6E	8	143018292	chr8:143018292:C:A	C	A	A	1192	12942	ADD	7067	1.27212	0.0901201	1.06615	1.51789	2.67073	0.00756865	neoplasms
512.9	Other dypnea	ACE2	X	15675734	chrX:15675734:C:T	C	T	T	2946	7326	ADD	5136	1.11049	0.039288	1.02819	1.19938	2.66749	0.00764191	respiratory
530.1	Esophagitis, GERD and related diseases	DPP4	2	162073222	chr2:162073222:G:A	G	A	A	3682	9678	ADD	6680	0.872491	0.0511671	0.789237	0.964527	-2.66583	0.00767987	digestive
250.42	Other abnormal glucose	ACE2	X	15674316	chrX:15674316:A:C	C	A	A	2348	9124	ADD	5736	0.884842	0.0459475	0.80864	0.968225	-2.66273	0.00775088	endocrine/metabolic
250.42	Other abnormal glucose	ACE2	X	15674699	chrX:15674699:T:C	C	T	T	2348	9124	ADD	5736	0.884842	0.0459475	0.80864	0.968225	-2.66273	0.00775088	endocrine/metabolic
250.42	Other abnormal glucose	ACE2	X	15675244	chrX:15675244:A:G	G	A	A	2348	9124	ADD	5736	0.884842	0.0459475	0.80864	0.968225	-2.66273	0.00775088	endocrine/metabolic
250.42	Other abnormal glucose	ACE2	X	15675338	chrX:15675338:T:A	A	T	T	2348	9124	ADD	5736	0.884842	0.0459475	0.80864	0.968225	-2.66273	0.00775088	endocrine/metabolic
531.2	Gastric ulcer	DPP4	2	162073469	chr2:162073469:A:G	A	G	G	136	16886	ADD	8511	0.534584	0.235487	0.336953	0.848132	-2.65945	0.00782688	digestive
447	Other disorders of arteries and arterioles	ACE2	X	15674316	chrX:15674316:A:C	C	A	A	544	14400	ADD	7472	1.22205	0.0754523	1.05406	1.41682	2.65773	0.00786679	circulatory system
447	Other disorders of arteries and arterioles	ACE2	X	15674699	chrX:15674699:T:C	C	T	T	544	14400	ADD	7472	1.22205	0.0754523	1.05406	1.41682	2.65773	0.00786679	circulatory system
447	Other disorders of arteries and arterioles	ACE2	X	15675244	chrX:15675244:A:G	G	A	A	544	14400	ADD	7472	1.22205	0.0754523	1.05406	1.41682	2.65773	0.00786679	circulatory system
447	Other disorders of arteries and arterioles	ACE2	X	15675338	chrX:15675338:T:A	A	T	T	544	14400	ADD	7472	1.22205	0.0754523	1.05406	1.41682	2.65773	0.00786679	circulatory system
596	Other disorders of bladder	ACE2	X	15674766	chrX:15674766:C:G	C	G	G	434	16060	ADD	8247	1.23506	0.0794468	1.05697	1.44316	2.65739	0.00787476	genitourinary
503	Pulmonary congestion and hypostasis	LY6E	8	143018292	chr8:143018292:C:A	C	A	A	52	14020	ADD	7036	2.28255	0.311185	1.24034	4.20051	2.6521	0.0079993	respiratory
182	Malignant neoplasm of uterus	TMPRSS2	21	41508700	chr21:41508700:G:A	G	A	A	168	13222	ADD	6695	2.66375	0.369784	1.29042	5.49861	2.64948	0.0080616	neoplasms
458.2	Iatrogenic hypotension	LY6E	8	143017718	chr8:143017718:G:C	C	G	G	70	12600	ADD	6335	1.93908	0.250197	1.18748	3.16638	2.64677	0.00812643	circulatory system
401.1	Essential hypertension	ACE2	X	15675244	chrX:15675244:A:G	G	A	A	10554	5666	ADD	8110	0.904674	0.0379197	0.839875	0.974472	-2.64191	0.00824404	circulatory system
912	Insect bite	TMPRSS2	21	41508701	chr21:41508701:T:G	G	T	T	46	17388	ADD	8717	2.89755	0.403113	1.31492	6.385	2.63912	0.00831214	injuries & poisonings
195	Cancer, suspected or other	LY6E	8	143018292	chr8:143018292:C:A	C	A	A	318	15350	ADD	7834	1.49991	0.153637	1.10991	2.02694	2.6387	0.00832255	neoplasms
370	Keratitis	LY6E	8	143018292	chr8:143018292:C:A	C	A	A	56	14556	ADD	7306	2.25672	0.308684	1.23233	4.13267	2.63672	0.00837119	sense organs
597.1	Urethral stricture (not specified as infectious)	TMPRSS2	21	41508700	chr21:41508700:G:A	G	A	A	102	16060	ADD	8081	3.34764	0.458508	1.36288	8.22283	2.63519	0.00840892	genitourinary
505	Other pulmonary inflamation or edema	DPP4	2	162074215	chr2:162074215:T:G	G	T	T	42	14020	ADD	7031	0.412574	0.33615	0.213487	0.79732	-2.63377	0.00844427	respiratory
401.1	Essential hypertension	ACE2	X	15674316	chrX:15674316:A:C	C	A	A	10554	5666	ADD	8110	0.904973	0.0379166	0.840158	0.974788	-2.63342	0.00845292	circulatory system
401.1	Essential hypertension	ACE2	X	15674699	chrX:15674699:T:C	C	T	T	10554	5666	ADD	8110	0.904973	0.0379166	0.840158	0.974788	-2.63342	0.00845292	circulatory system
401.1	Essential hypertension	ACE2	X	15675338	chrX:15675338:T:A	A	T	T	10554	5666	ADD	8110	0.904973	0.0379166	0.840158	0.974788	-2.63342	0.00845292	circulatory system
503	Pulmonary congestion and hypostasis	LY6E	8	143017718	chr8:143017718:G:C	C	G	G	52	14020	ADD	7036	0.201546	0.610444	0.0609205	0.666785	-2.62389	0.00869328	respiratory
788	Syncope and collapse	DPP4	2	162073222	chr2:162073222:G:A	G	A	A	1060	15266	ADD	8163	0.802	0.0841984	0.679993	0.945897	-2.62056	0.00877852	symptoms
601.3	Orchitis and epididymitis	DPP4	2	162073222	chr2:162073222:G:A	G	A	A	84	15234	ADD	7659	1.83483	0.231755	1.165	2.88979	2.61894	0.00882038	genitourinary
292.11	Aphasia	DPP4	2	162073469	chr2:162073469:A:G	A	G	G	72	14340	ADD	7206	1.84333	0.233554	1.16628	2.91344	2.61856	0.00883019	mental disorders
735.3	Hallux valgus (Bunion)	DPP4	2	162073222	chr2:162073222:G:A	G	A	A	308	15480	ADD	7894	0.650928	0.164307	0.47171	0.898239	-2.61313	0.00897175	musculoskeletal
759	Other and unspecified congenital anomalies	ACE2	X	15675244	chrX:15675244:A:G	G	A	A	60	17180	ADD	8620	1.75213	0.214629	1.15047	2.66845	2.61304	0.00897411	congenital anomalies
759	Other and unspecified congenital anomalies	ACE2	X	15674316	chrX:15674316:A:C	C	A	A	60	17180	ADD	8620	1.75186	0.214638	1.15027	2.66808	2.61219	0.00899636	congenital anomalies
759	Other and unspecified congenital anomalies	ACE2	X	15674699	chrX:15674699:T:C	C	T	T	60	17180	ADD	8620	1.75186	0.214638	1.15027	2.66808	2.61219	0.00899636	congenital anomalies
759	Other and unspecified congenital anomalies	ACE2	X	15675338	chrX:15675338:T:A	A	T	T	60	17180	ADD	8620	1.75186	0.214638	1.15027	2.66808	2.61219	0.00899636	congenital anomalies
480.3	Pneumonia due to fungus (mycoses)	LY6E	8	143018292	chr8:143018292:C:A	C	A	A	44	13578	ADD	6811	2.43037	0.33998	1.24819	4.7322	2.61204	0.00900044	respiratory
772	Symptoms of the muscles	ACE2	X	15675734	chrX:15675734:C:T	C	T	T	64	14980	ADD	7522	0.539623	0.236208	0.339649	0.857337	-2.61161	0.00901172	symptoms
458	Hypotension	TMPRSS2	21	41508701	chr21:41508701:T:G	G	T	T	418	12600	ADD	6509	0.389382	0.361223	0.191824	0.790406	-2.61111	0.00902489	circulatory system
514.1	Abnormal results of function study of pulmonary system	DPP4	2	162073199	chr2:162073199:T:G	T	G	G	166	15268	ADD	7717	1.54146	0.165781	1.11383	2.13327	2.61024	0.00904779	respiratory
276.6	Fluid overload	LY6E	8	143018292	chr8:143018292:C:A	C	A	A	538	11046	ADD	5792	1.38791	0.125707	1.08482	1.77567	2.60763	0.00911713	endocrine/metabolic
721.2	Spondylosis with myelopathy	TMPRSS2	21	41508700	chr21:41508700:G:A	G	A	A	198	13702	ADD	6950	2.52559	0.355333	1.25864	5.06784	2.60734	0.00912498	musculoskeletal
707.2	Chronic ulcer of leg or foot	LY6E	8	143018261	chr8:143018261:G:A	G	A	A	392	16708	ADD	8550	2.29713	0.319586	1.22787	4.29753	2.60231	0.00925986	dermatologic
696	Psoriasis and related disorders	DPP4	2	162074215	chr2:162074215:T:G	G	T	T	132	13140	ADD	6636	0.580665	0.209208	0.385343	0.874992	-2.59828	0.00936929	dermatologic
530	Diseases of esophagus	DPP4	2	162073222	chr2:162073222:G:A	G	A	A	3752	9678	ADD	6715	0.876339	0.0508113	0.793271	0.968106	-2.5979	0.00937968	digestive
170	Cancer of bone and connective tissue	ACE2	X	15675734	chrX:15675734:C:T	C	T	T	52	17588	ADD	8820	1.92335	0.251983	1.17373	3.15171	2.59568	0.0094404	neoplasms
506	Empyema and pneumothorax	ACE2	X	15675734	chrX:15675734:C:T	C	T	T	82	14020	ADD	7051	1.59399	0.18016	1.11978	2.26902	2.58794	0.00965529	respiratory
289.9	Abnormality of red blood cells	LY6E	8	143018261	chr8:143018261:G:A	G	A	A	48	13698	ADD	6873	4.00559	0.536911	1.39845	11.4732	2.58459	0.0097496	hematopoietic
255.21	Glucocorticoid deficiency	TMPRSS2	21	41508700	chr21:41508700:G:A	G	A	A	102	14812	ADD	7457	3.27802	0.460506	1.32931	8.08342	2.57812	0.00993406	endocrine/metabolic
242.2	Toxic multinodular goiter	TMPRSS2	21	41508700	chr21:41508700:G:A	G	A	A	26	14014	ADD	7020	4.88742	0.615591	1.46247	16.3332	2.57747	0.00995278	endocrine/metabolic
522.5	Periapical abscess	LY6E	8	143018292	chr8:143018292:C:A	C	A	A	126	15118	ADD	7622	1.74533	0.216314	1.14222	2.66689	2.57471	0.0100325	digestive
728.1	Muscular calcification and ossification	TMPRSS2	21	41508700	chr21:41508700:G:A	G	A	A	6	11508	ADD	5757	7.42346	0.779219	1.61188	34.1884	2.57263	0.0100928	musculoskeletal
257.1	Testicular hypofunction	TMPRSS2	21	41508700	chr21:41508700:G:A	G	A	A	292	14812	ADD	7552	2.21847	0.309745	1.20892	4.07108	2.5725	0.0100968	endocrine/metabolic
340.1	Migrain with aura	LY6E	8	143018292	chr8:143018292:C:A	C	A	A	184	14020	ADD	7102	0.426763	0.331098	0.223026	0.816616	-2.57183	0.0101163	neurological
539	Bariatric surgery	TMPRSS2	21	41508701	chr21:41508701:T:G	G	T	T	2430	14108	ADD	8269	0.743059	0.115618	0.592391	0.932047	-2.56862	0.0102104	digestive
599	Other symptoms/disorders or the urinary system	TMPRSS2	21	41508700	chr21:41508700:G:A	G	A	A	2716	10860	ADD	6788	1.4623	0.148127	1.09383	1.95489	2.56544	0.0103044	genitourinary
1013	Asphyxia and hypoxemia	LY6E	8	143018292	chr8:143018292:C:A	C	A	A	388	16846	ADD	8617	1.44732	0.14419	1.09101	1.91999	2.56407	0.0103453	NULL
733	Other disorders of bone and cartilage	LY6E	8	143018292	chr8:143018292:C:A	C	A	A	592	14128	ADD	7360	0.669745	0.156596	0.492736	0.910342	-2.55982	0.0104727	musculoskeletal
271.9	Other disorders of carbohydrate transport and metabolism	LY6E	8	143017718	chr8:143017718:G:C	C	G	G	28	15174	ADD	7601	2.51426	0.360292	1.24088	5.09438	2.55898	0.0104979	endocrine/metabolic
300	Anxiety disorders	DPP4	2	162073222	chr2:162073222:G:A	G	A	A	1640	7042	ADD	4341	0.831004	0.072388	0.721085	0.957679	-2.55733	0.0105478	mental disorders
185	Cancer of prostate	TMPRSS2	21	41508700	chr21:41508700:G:A	G	A	A	876	15234	ADD	8055	2.14821	0.299945	1.19334	3.86715	2.54926	0.0107952	neoplasms
370.1	Corneal ulcer	DPP4	2	162073222	chr2:162073222:G:A	G	A	A	40	14556	ADD	7298	2.17987	0.305732	1.19727	3.96891	2.54886	0.0108076	sense organs
525	Other diseases of the teeth and supporting structures	ACE2	X	15674766	chrX:15674766:C:G	C	G	G	320	15118	ADD	7719	1.28491	0.098371	1.05959	1.55814	2.54838	0.0108225	digestive
433.11	Occlusion of cerebral arteries, with cerebral infarction	TMPRSS2	21	41508700	chr21:41508700:G:A	G	A	A	106	14764	ADD	7435	3.0543	0.438231	1.29386	7.21	2.54786	0.0108387	circulatory system
627.1	Postmenopausal bleeding	ACE2	X	15675734	chrX:15675734:C:T	C	T	T	440	12686	ADD	6563	0.774759	0.100257	0.636543	0.942987	-2.54549	0.0109124	genitourinary
732	Osteochondropathies	TMPRSS2	21	41508700	chr21:41508700:G:A	G	A	A	4	14128	ADD	7066	6.63174	0.743725	1.54372	28.4897	2.54377	0.0109663	musculoskeletal
172.11	Melanomas of skin	ACE2	X	15675734	chrX:15675734:C:T	C	T	T	20	16746	ADD	8383	2.45828	0.353979	1.22835	4.9197	2.541	0.0110537	neoplasms
512.7	Shortness of breath	ACE2	X	15675734	chrX:15675734:C:T	C	T	T	4280	7326	ADD	5803	1.09096	0.0343292	1.01997	1.16689	2.53591	0.0112155	respiratory
556	Ulceration of the lower GI tract	ACE2	X	15675244	chrX:15675244:A:G	G	A	A	50	12050	ADD	6050	1.71979	0.213819	1.13103	2.61505	2.53581	0.0112188	digestive
601.3	Orchitis and epididymitis	DPP4	2	162073199	chr2:162073199:T:G	T	G	G	84	15234	ADD	7659	1.78758	0.229107	1.1409	2.80079	2.53532	0.0112344	genitourinary
732.7	Osteochondritis dissecans	TMPRSS2	21	41508700	chr21:41508700:G:A	G	A	A	2	14128	ADD	7065	6.62947	0.746681	1.53427	28.6454	2.53324	0.0113013	musculoskeletal
556	Ulceration of the lower GI tract	ACE2	X	15674316	chrX:15674316:A:C	C	A	A	50	12050	ADD	6050	1.71948	0.213977	1.13047	2.61538	2.53307	0.0113068	digestive
556	Ulceration of the lower GI tract	ACE2	X	15674699	chrX:15674699:T:C	C	T	T	50	12050	ADD	6050	1.71948	0.213977	1.13047	2.61538	2.53307	0.0113068	digestive
556	Ulceration of the lower GI tract	ACE2	X	15675338	chrX:15675338:T:A	A	T	T	50	12050	ADD	6050	1.71948	0.213977	1.13047	2.61538	2.53307	0.0113068	digestive
740.1	Osteoarthritis; localized	DPP4	2	162073222	chr2:162073222:G:A	G	A	A	1222	11812	ADD	6517	0.811423	0.0825401	0.690222	0.953906	-2.53169	0.0113515	musculoskeletal
153.3	Malignant neoplasm of rectum, rectosigmoid junction, and anus	DPP4	2	162073199	chr2:162073199:T:G	T	G	G	144	13516	ADD	6830	1.5632	0.176613	1.10581	2.20978	2.52945	0.011424	neoplasms
949	Allergies, other	ACE2	X	15675734	chrX:15675734:C:T	C	T	T	724	12656	ADD	6690	1.19289	0.06979	1.04039	1.36775	2.52731	0.0114941	injuries & poisonings
172.2	Other non-epithelial cancer of skin	LY6E	8	143018261	chr8:143018261:G:A	G	A	A	38	16746	ADD	8392	4.70736	0.613798	1.41355	15.6763	2.52384	0.0116081	neoplasms
1010.1	NA	TMPRSS2	21	41508701	chr21:41508701:T:G	G	T	T	58	17648	ADD	8853	2.58361	0.376216	1.23592	5.40086	2.52299	0.0116363	NA
473	Diseases of the larynx and vocal cords	LY6E	8	143017718	chr8:143017718:G:C	C	G	G	450	10330	ADD	5390	1.35184	0.119499	1.06957	1.70861	2.52275	0.0116442	respiratory
696.4	Psoriasis	DPP4	2	162074215	chr2:162074215:T:G	G	T	T	116	13140	ADD	6628	0.579895	0.216034	0.379718	0.885601	-2.52233	0.0116582	dermatologic
244.2	Acquired hypothyroidism	LY6E	8	143018292	chr8:143018292:C:A	C	A	A	418	14014	ADD	7216	1.42312	0.139927	1.08177	1.87218	2.52169	0.0116792	endocrine/metabolic
300	Anxiety disorders	DPP4	2	162073199	chr2:162073199:T:G	T	G	G	1640	7042	ADD	4341	0.84008	0.0692051	0.733522	0.962117	-2.518	0.0118022	mental disorders
726.4	Calcaneal spur; Exostosis NOS	DPP4	2	162073469	chr2:162073469:A:G	A	G	G	70	11508	ADD	5789	0.411894	0.352391	0.206457	0.821752	-2.51706	0.0118338	musculoskeletal
701.5	Abnormal granulation tissue	LY6E	8	143018261	chr8:143018261:G:A	G	A	A	16	15778	ADD	7897	6.53628	0.745958	1.51485	28.2027	2.51672	0.0118453	dermatologic
528	Diseases of the oral soft tissues, excluding lesions specific for gingiva and tongue	ACE2	X	15674766	chrX:15674766:C:G	C	G	G	170	16206	ADD	8188	0.717351	0.132065	0.553755	0.929278	-2.51535	0.0118913	digestive
170	Cancer of bone and connective tissue	ACE2	X	15674766	chrX:15674766:C:G	C	G	G	52	17588	ADD	8820	1.88246	0.251658	1.14951	3.08274	2.51364	0.0119494	neoplasms
505	Other pulmonary inflamation or edema	DPP4	2	162073199	chr2:162073199:T:G	T	G	G	42	14020	ADD	7031	1.9515	0.266116	1.15838	3.28767	2.51243	0.0119901	respiratory
727.1	Synovitis and tenosynovitis	LY6E	8	143017718	chr8:143017718:G:C	C	G	G	890	11508	ADD	6199	1.24803	0.0882266	1.04985	1.48362	2.51133	0.0120279	musculoskeletal
371.1	Uveitis, noninfectious or NOS	DPP4	2	162073222	chr2:162073222:G:A	G	A	A	262	14556	ADD	7409	1.42943	0.142419	1.08127	1.88968	2.5086	0.0121211	sense organs
764	Sciatica	ACE2	X	15674766	chrX:15674766:C:G	C	G	G	1468	13410	ADD	7439	1.13201	0.0494425	1.02746	1.2472	2.50781	0.0121482	symptoms
253.1	Pituitary hyperfunction	LY6E	8	143018261	chr8:143018261:G:A	G	A	A	72	14812	ADD	7442	3.71753	0.524076	1.33095	10.3836	2.50548	0.0122286	endocrine/metabolic
514.1	Abnormal results of function study of pulmonary system	DPP4	2	162073469	chr2:162073469:A:G	A	G	G	166	15268	ADD	7717	1.50258	0.162746	1.09221	2.06713	2.50195	0.012351	respiratory
350	Abnormal movement	ACE2	X	15675734	chrX:15675734:C:T	C	T	T	498	14758	ADD	7628	0.815221	0.0816602	0.69465	0.956719	-2.50179	0.0123568	neurological
172.11	Melanomas of skin	ACE2	X	15674766	chrX:15674766:C:G	C	G	G	20	16746	ADD	8383	2.40955	0.352562	1.20735	4.8088	2.49443	0.0126161	neoplasms
562.2	Diverticulitis	ACE2	X	15675734	chrX:15675734:C:T	C	T	T	252	12050	ADD	6151	1.32871	0.113954	1.06276	1.66123	2.49409	0.0126279	digestive
747.2	Congenital anomalies of peripheral vascular system	LY6E	8	143018292	chr8:143018292:C:A	C	A	A	96	17022	ADD	8559	1.88836	0.255028	1.14553	3.11291	2.49271	0.0126772	congenital anomalies
636	Early or threatened labor; hemorrhage in early pregnancy	LY6E	8	143018292	chr8:143018292:C:A	C	A	A	528	16082	ADD	8305	0.651375	0.172001	0.464968	0.912512	-2.49225	0.0126936	pregnancy complications
402	Elevated blood pressure reading without diagnosis of hypertension	ACE2	X	15675244	chrX:15675244:A:G	G	A	A	286	16892	ADD	8589	1.31723	0.11067	1.06038	1.63631	2.4897	0.0127852	circulatory system
609	Male infertility and abnormal spermatozoa	TMPRSS2	21	41508701	chr21:41508701:T:G	G	T	T	56	14468	ADD	7262	2.79114	0.412489	1.24357	6.26459	2.48843	0.0128308	genitourinary
503	Pulmonary congestion and hypostasis	ACE2	X	15675244	chrX:15675244:A:G	G	A	A	52	14020	ADD	7036	1.71478	0.216789	1.12118	2.62264	2.48759	0.0128611	respiratory
402	Elevated blood pressure reading without diagnosis of hypertension	ACE2	X	15674316	chrX:15674316:A:C	C	A	A	286	16892	ADD	8589	1.31688	0.110669	1.06009	1.63587	2.48727	0.0128727	circulatory system
402	Elevated blood pressure reading without diagnosis of hypertension	ACE2	X	15674699	chrX:15674699:T:C	C	T	T	286	16892	ADD	8589	1.31688	0.110669	1.06009	1.63587	2.48727	0.0128727	circulatory system
402	Elevated blood pressure reading without diagnosis of hypertension	ACE2	X	15675338	chrX:15675338:T:A	A	T	T	286	16892	ADD	8589	1.31688	0.110669	1.06009	1.63587	2.48727	0.0128727	circulatory system
503	Pulmonary congestion and hypostasis	ACE2	X	15674316	chrX:15674316:A:C	C	A	A	52	14020	ADD	7036	1.71373	0.216778	1.12052	2.62099	2.48491	0.0129584	respiratory
503	Pulmonary congestion and hypostasis	ACE2	X	15674699	chrX:15674699:T:C	C	T	T	52	14020	ADD	7036	1.71373	0.216778	1.12052	2.62099	2.48491	0.0129584	respiratory
503	Pulmonary congestion and hypostasis	ACE2	X	15675338	chrX:15675338:T:A	A	T	T	52	14020	ADD	7036	1.71373	0.216778	1.12052	2.62099	2.48491	0.0129584	respiratory
592	Cystitis and urethritis	TMPRSS2	21	41508701	chr21:41508701:T:G	G	T	T	90	11610	ADD	5850	2.29093	0.333985	1.19048	4.4086	2.48202	0.0130639	genitourinary
464	Acute sinusitis	ACE2	X	15674766	chrX:15674766:C:G	C	G	G	752	11522	ADD	6137	1.1907	0.0703613	1.03731	1.36676	2.48061	0.0131156	respiratory
694.3	Vascular disorders of skin	LY6E	8	143018261	chr8:143018261:G:A	G	A	A	8	13610	ADD	6809	6.86097	0.77697	1.49633	31.4589	2.47867	0.0131875	dermatologic
575.7	Other disorders of gallbladder	TMPRSS2	21	41508700	chr21:41508700:G:A	G	A	A	18	16340	ADD	8179	4.75144	0.628905	1.38516	16.2986	2.47803	0.0132109	digestive
369.2	Eye infection, viral	LY6E	8	143018261	chr8:143018261:G:A	G	A	A	100	14556	ADD	7328	3.20626	0.470853	1.27411	8.06843	2.47446	0.0133439	sense organs
735.23	Hallux rigidus	LY6E	8	143018261	chr8:143018261:G:A	G	A	A	42	15480	ADD	7761	4.44865	0.603476	1.36317	14.518	2.47334	0.0133857	musculoskeletal
153.3	Malignant neoplasm of rectum, rectosigmoid junction, and anus	DPP4	2	162073222	chr2:162073222:G:A	G	A	A	144	13516	ADD	6830	1.56634	0.181481	1.09751	2.23544	2.47266	0.0134113	neoplasms
531.2	Gastric ulcer	DPP4	2	162073199	chr2:162073199:T:G	T	G	G	136	16886	ADD	8511	0.546345	0.244638	0.338245	0.882477	-2.47102	0.013473	digestive
260	Protein-calorie malnutrition	LY6E	8	143018292	chr8:143018292:C:A	C	A	A	532	11776	ADD	6154	1.37012	0.127618	1.06692	1.75949	2.46752	0.0136051	endocrine/metabolic
722.8	Postlaminectomy syndrome	TMPRSS2	21	41508700	chr21:41508700:G:A	G	A	A	48	13702	ADD	6875	3.68738	0.528983	1.30752	10.3989	2.46684	0.0136312	musculoskeletal
556.11	Angiodysplasia of intestine (without mention of hemorrhage)	LY6E	8	143018292	chr8:143018292:C:A	C	A	A	44	12050	ADD	6047	2.12832	0.306285	1.16769	3.87925	2.46611	0.0136588	digestive
575.9	Nonspecific abnormal findings on radiological and other examination of biliary tract	ACE2	X	15675734	chrX:15675734:C:T	C	T	T	36	16340	ADD	8188	2.08622	0.298455	1.16229	3.74461	2.46387	0.0137446	digestive
514.1	Abnormal results of function study of pulmonary system	ACE2	X	15675734	chrX:15675734:C:T	C	T	T	166	15268	ADD	7717	1.39654	0.135563	1.07068	1.82156	2.46377	0.0137485	respiratory
272.13	Mixed hyperlipidemia	ACE2	X	15674766	chrX:15674766:C:G	C	G	G	2942	8752	ADD	5847	1.10518	0.0406079	1.02062	1.19673	2.4627	0.0137895	endocrine/metabolic
302.1	Decreased libido	DPP4	2	162073222	chr2:162073222:G:A	G	A	A	62	7042	ADD	3552	1.91313	0.263871	1.14061	3.20887	2.45855	0.0139498	mental disorders
743.9	Osteopenia or other disorder of bone and cartilage	ACE2	X	15675734	chrX:15675734:C:T	C	T	T	560	15886	ADD	8223	1.2242	0.0823096	1.04181	1.43851	2.45763	0.0139856	musculoskeletal
720.1	Spinal stenosis of lumbar region	ACE2	X	15674766	chrX:15674766:C:G	C	G	G	644	13702	ADD	7173	0.838591	0.0718022	0.728504	0.965313	-2.45163	0.014221	musculoskeletal
272.12	Hyperglyceridemia	ACE2	X	15674766	chrX:15674766:C:G	C	G	G	234	8752	ADD	4493	1.30993	0.110171	1.05553	1.62565	2.4505	0.0142657	endocrine/metabolic
531.3	Duodenal ulcer	DPP4	2	162074215	chr2:162074215:T:G	G	T	T	50	16886	ADD	8468	0.445654	0.32985	0.233469	0.850681	-2.45024	0.014276	digestive
741.5	Hemarthrosis	LY6E	8	143018261	chr8:143018261:G:A	G	A	A	16	14448	ADD	7232	6.41457	0.75858	1.45032	28.3708	2.45007	0.0142829	musculoskeletal
374.2	Lagophthalmos	LY6E	8	143017718	chr8:143017718:G:C	C	G	G	14	14556	ADD	7285	2.13261	0.30921	1.16335	3.9094	2.44929	0.0143137	sense organs
384	Other disorders of tympanic membrane	LY6E	8	143018261	chr8:143018261:G:A	G	A	A	14	15516	ADD	7765	6.44508	0.760789	1.45092	28.6295	2.44919	0.0143179	sense organs
760	Back pain	ACE2	X	15674316	chrX:15674316:A:C	C	A	A	4894	10326	ADD	7610	0.91998	0.034068	0.860557	0.983506	-2.44814	0.0143594	symptoms
760	Back pain	ACE2	X	15674699	chrX:15674699:T:C	C	T	T	4894	10326	ADD	7610	0.91998	0.034068	0.860557	0.983506	-2.44814	0.0143594	symptoms
760	Back pain	ACE2	X	15675338	chrX:15675338:T:A	A	T	T	4894	10326	ADD	7610	0.91998	0.034068	0.860557	0.983506	-2.44814	0.0143594	symptoms
464	Acute sinusitis	ACE2	X	15675734	chrX:15675734:C:T	C	T	T	752	11522	ADD	6137	1.18763	0.0702674	1.03483	1.36299	2.44724	0.0143956	respiratory
707	Chronic ulcer of skin	ACE2	X	15674766	chrX:15674766:C:G	C	G	G	296	16708	ADD	8502	0.790227	0.0962143	0.654416	0.954222	-2.44699	0.0144055	dermatologic
315	Develomental delays and disorders	LY6E	8	143018261	chr8:143018261:G:A	G	A	A	50	17146	ADD	8598	4.41799	0.607601	1.34287	14.535	2.44517	0.0144785	mental disorders
695.2	Bullous dermatoses	TMPRSS2	21	41508700	chr21:41508700:G:A	G	A	A	18	13610	ADD	6814	4.29763	0.597423	1.33261	13.8598	2.44059	0.0146633	dermatologic
459.7	Blood vessel replaced	DPP4	2	162074215	chr2:162074215:T:G	G	T	T	186	12600	ADD	6393	1.44375	0.150736	1.07445	1.93999	2.43634	0.0148365	circulatory system
288.2	Elevated white blood cell count	LY6E	8	143017718	chr8:143017718:G:C	C	G	G	424	13698	ADD	7061	1.33557	0.118988	1.05776	1.68636	2.43186	0.0150214	hematopoietic
509.1	Respiratory failure	LY6E	8	143018292	chr8:143018292:C:A	C	A	A	602	14020	ADD	7311	1.33679	0.119371	1.05792	1.68917	2.43168	0.0150292	respiratory
275.3	Disorders of magnesium metabolism	LY6E	8	143018292	chr8:143018292:C:A	C	A	A	640	14386	ADD	7513	1.32587	0.116082	1.05606	1.6646	2.42987	0.0151042	endocrine/metabolic
282.9	Other hereditary hemolytic anemias	DPP4	2	162073222	chr2:162073222:G:A	G	A	A	86	8724	ADD	4405	1.75985	0.232623	1.11549	2.77641	2.4298	0.0151073	hematopoietic
760	Back pain	ACE2	X	15675244	chrX:15675244:A:G	G	A	A	4894	10326	ADD	7610	0.920554	0.0340713	0.861088	0.984126	-2.42961	0.0151151	symptoms
473.4	Voice disturbance	LY6E	8	143017718	chr8:143017718:G:C	C	G	G	416	10330	ADD	5373	1.35131	0.124302	1.05913	1.7241	2.42215	0.0154291	respiratory
585	Renal failure	DPP4	2	162074215	chr2:162074215:T:G	G	T	T	3146	10540	ADD	6843	1.11896	0.0464292	1.02163	1.22556	2.42091	0.0154816	genitourinary
452.2	Deep vein thrombosis [DVT]	ACE2	X	15675734	chrX:15675734:C:T	C	T	T	868	11138	ADD	6003	1.15661	0.0601365	1.02801	1.30129	2.4194	0.0155461	circulatory system
612	Breast conditions, congenital or relating to hormones	DPP4	2	162073222	chr2:162073222:G:A	G	A	A	108	14402	ADD	7255	0.464175	0.317712	0.249026	0.865205	-2.41569	0.0157056	genitourinary
331.1	Hydrocephalus	TMPRSS2	21	41508700	chr21:41508700:G:A	G	A	A	40	14406	ADD	7223	3.6729	0.538599	1.27807	10.5552	2.41549	0.0157139	neurological
282.9	Other hereditary hemolytic anemias	DPP4	2	162073199	chr2:162073199:T:G	T	G	G	86	8724	ADD	4405	1.73957	0.229286	1.10988	2.72654	2.41463	0.015751	hematopoietic
710.19	Unspecified osteomyelitis	DPP4	2	162073222	chr2:162073222:G:A	G	A	A	190	14484	ADD	7337	1.47092	0.159984	1.07501	2.01265	2.41206	0.0158627	musculoskeletal
418.1	Precordial pain	LY6E	8	143018261	chr8:143018261:G:A	G	A	A	386	9748	ADD	5067	2.18212	0.323545	1.15738	4.11415	2.41171	0.015878	circulatory system
763	Thoracic or lumbosacral neuritis or radiculitis, unspecified	LY6E	8	143017718	chr8:143017718:G:C	C	G	G	1076	13410	ADD	7243	1.21105	0.0794557	1.0364	1.41512	2.40997	0.0159536	symptoms
459.1	Hemorrhage NOS	TMPRSS2	21	41508700	chr21:41508700:G:A	G	A	A	36	12600	ADD	6318	4.3374	0.609877	1.31251	14.3337	2.40586	0.0161347	circulatory system
613.5	Mastodynia	LY6E	8	143017718	chr8:143017718:G:C	C	G	G	422	16084	ADD	8253	1.33123	0.118931	1.05443	1.68068	2.4056	0.0161459	genitourinary
797	Shock	DPP4	2	162073469	chr2:162073469:A:G	A	G	G	134	17032	ADD	8583	1.48448	0.164286	1.07581	2.0484	2.40475	0.0161837	symptoms
477	Epistaxis or throat hemorrhage	ACE2	X	15674316	chrX:15674316:A:C	C	A	A	340	10330	ADD	5335	0.758815	0.114844	0.605871	0.950367	-2.40324	0.0162506	respiratory
477	Epistaxis or throat hemorrhage	ACE2	X	15674699	chrX:15674699:T:C	C	T	T	340	10330	ADD	5335	0.758815	0.114844	0.605871	0.950367	-2.40324	0.0162506	respiratory
477	Epistaxis or throat hemorrhage	ACE2	X	15675244	chrX:15675244:A:G	G	A	A	340	10330	ADD	5335	0.758815	0.114844	0.605871	0.950367	-2.40324	0.0162506	respiratory
477	Epistaxis or throat hemorrhage	ACE2	X	15675338	chrX:15675338:T:A	A	T	T	340	10330	ADD	5335	0.758815	0.114844	0.605871	0.950367	-2.40324	0.0162506	respiratory
938.2	Chronic dermatitis due to solar radiation	LY6E	8	143018261	chr8:143018261:G:A	G	A	A	6	12656	ADD	6331	6.16877	0.757598	1.39743	27.2312	2.40167	0.0163205	dermatologic
229	Benign neoplasm of unspecified sites	TMPRSS2	21	41508700	chr21:41508700:G:A	G	A	A	56	17594	ADD	8825	3.5173	0.523737	1.2601	9.81782	2.40139	0.0163331	neoplasms
370.1	Corneal ulcer	DPP4	2	162073469	chr2:162073469:A:G	A	G	G	40	14556	ADD	7298	2.04924	0.298775	1.14097	3.68053	2.40137	0.0163339	sense organs
717	Polymyalgia Rheumatica	LY6E	8	143018261	chr8:143018261:G:A	G	A	A	60	17672	ADD	8866	3.46394	0.517485	1.25628	9.55113	2.40086	0.0163566	musculoskeletal
274	Gout and other crystal arthropathies	LY6E	8	143018261	chr8:143018261:G:A	G	A	A	870	16026	ADD	8448	0.179101	0.716624	0.043965	0.729608	-2.39987	0.0164008	endocrine/metabolic
743.11	Osteoporosis NOS	TMPRSS2	21	41508700	chr21:41508700:G:A	G	A	A	496	15886	ADD	8191	1.87762	0.262582	1.12227	3.14135	2.39926	0.016428	musculoskeletal
358.1	Myasthenia gravis	LY6E	8	143018261	chr8:143018261:G:A	G	A	A	38	15942	ADD	7990	4.33667	0.611806	1.30733	14.3856	2.39799	0.0164852	neurological
681.3	Cellulitis and abscess of arm/hand	DPP4	2	162073199	chr2:162073199:T:G	T	G	G	218	13750	ADD	6984	0.638068	0.187378	0.441947	0.92122	-2.39788	0.0164901	dermatologic
562.2	Diverticulitis	ACE2	X	15674766	chrX:15674766:C:G	C	G	G	252	12050	ADD	6151	1.31472	0.114259	1.05094	1.64472	2.39478	0.0166303	digestive
251	Other disorders of pancreatic internal secretion	DPP4	2	162074215	chr2:162074215:T:G	G	T	T	42	14812	ADD	7427	1.97583	0.284664	1.13095	3.45188	2.39225	0.0167453	endocrine/metabolic
292	Neurological disorders	DPP4	2	162073222	chr2:162073222:G:A	G	A	A	738	14340	ADD	7539	0.78387	0.101794	0.642091	0.956955	-2.3922	0.0167477	mental disorders
415.21	Primary pulmonary hypertension	ACE2	X	15675244	chrX:15675244:A:G	G	A	A	336	14402	ADD	7369	1.26383	0.0979869	1.04299	1.53142	2.38955	0.0168691	circulatory system
557	Intestinal malabsorption (non-celiac)	ACE2	X	15675734	chrX:15675734:C:T	C	T	T	42	12050	ADD	6046	1.92114	0.27388	1.12313	3.28613	2.38395	0.0171279	digestive
415.21	Primary pulmonary hypertension	ACE2	X	15674316	chrX:15674316:A:C	C	A	A	336	14402	ADD	7369	1.26299	0.0979842	1.04231	1.5304	2.38286	0.0171788	circulatory system
415.21	Primary pulmonary hypertension	ACE2	X	15674699	chrX:15674699:T:C	C	T	T	336	14402	ADD	7369	1.26299	0.0979842	1.04231	1.5304	2.38286	0.0171788	circulatory system
415.21	Primary pulmonary hypertension	ACE2	X	15675338	chrX:15675338:T:A	A	T	T	336	14402	ADD	7369	1.26299	0.0979842	1.04231	1.5304	2.38286	0.0171788	circulatory system
261.3	Vitamin C deficiencies	LY6E	8	143018261	chr8:143018261:G:A	G	A	A	4	11776	ADD	5890	6.20778	0.766363	1.38232	27.8782	2.38243	0.0171989	endocrine/metabolic
735.3	Hallux valgus (Bunion)	DPP4	2	162073199	chr2:162073199:T:G	T	G	G	308	15480	ADD	7894	0.694058	0.15345	0.513782	0.937588	-2.37993	0.0173157	musculoskeletal
965.1	Opiates and related narcotics causing adverse effects in therapeutic use	DPP4	2	162074215	chr2:162074215:T:G	G	T	T	212	12966	ADD	6589	0.684228	0.159534	0.500501	0.935399	-2.37857	0.0173798	injuries & poisonings
317	Alcohol-related disorders	DPP4	2	162074215	chr2:162074215:T:G	G	T	T	628	10372	ADD	5500	1.22702	0.0863281	1.03602	1.45323	2.36992	0.0177918	mental disorders
271.9	Other disorders of carbohydrate transport and metabolism	TMPRSS2	21	41508701	chr21:41508701:T:G	G	T	T	28	15174	ADD	7601	3.10125	0.47787	1.21555	7.91227	2.36844	0.0178633	endocrine/metabolic
695.22	Pemphigus and pemphigoid	TMPRSS2	21	41508700	chr21:41508700:G:A	G	A	A	22	13610	ADD	6816	4.1442	0.600466	1.27739	13.4449	2.36768	0.0179001	dermatologic
528	Diseases of the oral soft tissues, excluding lesions specific for gingiva and tongue	ACE2	X	15675734	chrX:15675734:C:T	C	T	T	170	16206	ADD	8188	0.731536	0.132036	0.564737	0.9476	-2.3676	0.0179039	digestive
701.4	Keloid scar	DPP4	2	162073199	chr2:162073199:T:G	T	G	G	180	15778	ADD	7979	1.45745	0.159274	1.06664	1.99145	2.36503	0.0180285	dermatologic
910	Superficial injury, infected	LY6E	8	143018261	chr8:143018261:G:A	G	A	A	2	17724	ADD	8863	5.99381	0.757398	1.35833	26.4485	2.36431	0.0180635	injuries & poisonings
272.1	Hyperlipidemia	ACE2	X	15674766	chrX:15674766:C:G	C	G	G	7020	8752	ADD	7886	1.07846	0.0319564	1.01299	1.14817	2.36369	0.0180937	endocrine/metabolic
420.3	Endocarditis	LY6E	8	143018292	chr8:143018292:C:A	C	A	A	138	14744	ADD	7441	1.6428	0.210034	1.08844	2.47952	2.36345	0.0181058	circulatory system
743.4	Stress fracture	ACE2	X	15675734	chrX:15675734:C:T	C	T	T	52	15886	ADD	7969	0.53447	0.2652	0.317823	0.898797	-2.36229	0.0181623	musculoskeletal
601.4	Balanoposthitis	TMPRSS2	21	41508700	chr21:41508700:G:A	G	A	A	10	15234	ADD	7622	6.34381	0.784968	1.36202	29.5472	2.35357	0.0185939	genitourinary
681.2	Cellulitis and abscess of face/neck	TMPRSS2	21	41508700	chr21:41508700:G:A	G	A	A	136	13750	ADD	6943	2.75106	0.430404	1.18342	6.39529	2.35125	0.0187107	dermatologic
735.3	Hallux valgus (Bunion)	DPP4	2	162073469	chr2:162073469:A:G	A	G	G	308	15480	ADD	7894	0.709292	0.14609	0.532688	0.944446	-2.3512	0.0187127	musculoskeletal
797	Shock	DPP4	2	162073199	chr2:162073199:T:G	T	G	G	134	17032	ADD	8583	1.48003	0.166978	1.06694	2.05307	2.34801	0.0188742	symptoms
250.42	Other abnormal glucose	ACE2	X	15674766	chrX:15674766:C:G	C	G	G	2348	9124	ADD	5736	1.10147	0.0411745	1.01607	1.19404	2.34714	0.0189182	endocrine/metabolic
187.8	Neoplasm of uncertain behavior of male genital organs	LY6E	8	143018261	chr8:143018261:G:A	G	A	A	14	16682	ADD	8348	6.27232	0.782521	1.35315	29.0744	2.34645	0.0189532	neoplasms
701.6	Acquired acanthosis nigricans	TMPRSS2	21	41508701	chr21:41508701:T:G	G	T	T	22	15778	ADD	7900	3.37268	0.518935	1.21971	9.32595	2.3427	0.0191449	dermatologic
350	Abnormal movement	ACE2	X	15674766	chrX:15674766:C:G	C	G	G	498	14758	ADD	7628	0.826499	0.0813671	0.704664	0.969397	-2.34194	0.0191836	neurological
596	Other disorders of bladder	ACE2	X	15675734	chrX:15675734:C:T	C	T	T	434	16060	ADD	8247	1.20308	0.0789607	1.03058	1.40445	2.34146	0.0192085	genitourinary
367	Disorders of refraction and accommodation; blindness and low vision	TMPRSS2	21	41508700	chr21:41508700:G:A	G	A	A	1292	14070	ADD	7681	1.55014	0.187251	1.07395	2.23749	2.34096	0.019234	sense organs
512.8	Cough	ACE2	X	15675734	chrX:15675734:C:T	C	T	T	3462	7326	ADD	5394	1.0919	0.037558	1.01441	1.17531	2.34087	0.0192391	respiratory
761	Cervicalgia	DPP4	2	162073222	chr2:162073222:G:A	G	A	A	1596	14290	ADD	7943	0.851908	0.068551	0.744804	0.974413	-2.33807	0.0193836	symptoms
619.3	Noninflammatory disorders of cervix	DPP4	2	162073222	chr2:162073222:G:A	G	A	A	90	14484	ADD	7287	0.461907	0.330815	0.241526	0.883375	-2.33481	0.0195532	genitourinary
527	Diseases of the salivary glands	LY6E	8	143018261	chr8:143018261:G:A	G	A	A	182	16206	ADD	8194	2.55364	0.40158	1.16234	5.6103	2.33458	0.0195656	digestive
540.1	Appendicitis	LY6E	8	143017718	chr8:143017718:G:C	C	G	G	48	17610	ADD	8829	2.00112	0.297167	1.11769	3.58279	2.33439	0.0195751	digestive
578.9	Hemorrhage of gastrointestinal tract	TMPRSS2	21	41508701	chr21:41508701:T:G	G	T	T	378	14128	ADD	7253	0.449926	0.342183	0.230078	0.879849	-2.33405	0.0195933	digestive
362.23	Cystoid macular degeneration of retina	LY6E	8	143018292	chr8:143018292:C:A	C	A	A	106	13982	ADD	7044	1.74808	0.239328	1.09356	2.79433	2.33368	0.0196125	sense organs
348.7	Coma	DPP4	2	162074215	chr2:162074215:T:G	G	T	T	430	14406	ADD	7418	0.775331	0.109087	0.626084	0.960156	-2.33269	0.0196644	neurological
916	NA	DPP4	2	162074215	chr2:162074215:T:G	G	T	T	840	15362	ADD	8101	1.18735	0.0736344	1.02778	1.37169	2.33211	0.0196947	NA
281.12	Other vitamin B12 deficiency anemia	LY6E	8	143018292	chr8:143018292:C:A	C	A	A	128	8724	ADD	4426	1.68982	0.225147	1.08691	2.62715	2.33012	0.0197999	hematopoietic
696.4	Psoriasis	DPP4	2	162073222	chr2:162073222:G:A	G	A	A	116	13140	ADD	6628	1.58865	0.198689	1.07623	2.34505	2.32969	0.0198227	dermatologic
761	Cervicalgia	DPP4	2	162073199	chr2:162073199:T:G	T	G	G	1596	14290	ADD	7943	0.858275	0.0656921	0.754587	0.976211	-2.32646	0.0199939	symptoms
791	Gangrene	DPP4	2	162073222	chr2:162073222:G:A	G	A	A	80	17544	ADD	8812	1.72588	0.234637	1.08965	2.73359	2.32588	0.0200249	symptoms
946	Anaphylactic shock NOS	DPP4	2	162074215	chr2:162074215:T:G	G	T	T	146	12656	ADD	6401	0.64579	0.188123	0.446643	0.933731	-2.32444	0.0201018	injuries & poisonings
592.11	Acute cystitis	LY6E	8	143018292	chr8:143018292:C:A	C	A	A	100	11610	ADD	5855	1.80186	0.253333	1.09669	2.96045	2.32428	0.0201102	genitourinary
452.2	Deep vein thrombosis [DVT]	ACE2	X	15674766	chrX:15674766:C:G	C	G	G	868	11138	ADD	6003	1.14965	0.0601143	1.02187	1.2934	2.3198	0.0203516	circulatory system
560	Intestinal obstruction without mention of hernia	ACE2	X	15674316	chrX:15674316:A:C	C	A	A	246	12050	ADD	6148	0.730993	0.135078	0.560964	0.952558	-2.31979	0.0203522	digestive
560	Intestinal obstruction without mention of hernia	ACE2	X	15674699	chrX:15674699:T:C	C	T	T	246	12050	ADD	6148	0.730993	0.135078	0.560964	0.952558	-2.31979	0.0203522	digestive
560	Intestinal obstruction without mention of hernia	ACE2	X	15675338	chrX:15675338:T:A	A	T	T	246	12050	ADD	6148	0.730993	0.135078	0.560964	0.952558	-2.31979	0.0203522	digestive
573	Other disorders of liver	TMPRSS2	21	41508701	chr21:41508701:T:G	G	T	T	304	14022	ADD	7163	0.371919	0.426793	0.161125	0.85849	-2.31747	0.0204782	digestive
374.6	Dermatochalasis	DPP4	2	162073222	chr2:162073222:G:A	G	A	A	50	14556	ADD	7303	1.81701	0.257893	1.09607	3.01215	2.31567	0.0205765	sense organs
560	Intestinal obstruction without mention of hernia	ACE2	X	15675244	chrX:15675244:A:G	G	A	A	246	12050	ADD	6148	0.731422	0.135095	0.561274	0.953149	-2.31515	0.0206048	digestive
818	Intracranial hemorrhage (injury)	LY6E	8	143018292	chr8:143018292:C:A	C	A	A	64	17028	ADD	8546	1.99624	0.298628	1.11178	3.5843	2.31479	0.0206242	injuries & poisonings
506	Empyema and pneumothorax	ACE2	X	15674766	chrX:15674766:C:G	C	G	G	82	14020	ADD	7051	1.51026	0.178111	1.06523	2.14121	2.31474	0.0206272	respiratory
297.1	Suicidal ideation	LY6E	8	143018261	chr8:143018261:G:A	G	A	A	110	7042	ADD	3576	2.92702	0.464284	1.17822	7.27151	2.3132	0.0207115	mental disorders
721.2	Spondylosis with myelopathy	TMPRSS2	21	41508701	chr21:41508701:T:G	G	T	T	198	13702	ADD	6950	1.81977	0.258922	1.09552	3.02281	2.31231	0.0207607	musculoskeletal
480.5	Bronchopneumonia and lung abscess	TMPRSS2	21	41508700	chr21:41508700:G:A	G	A	A	24	13578	ADD	6801	3.96823	0.596098	1.23367	12.7643	2.31224	0.0207645	respiratory
599.7	Urethral discharge	TMPRSS2	21	41508700	chr21:41508700:G:A	G	A	A	30	10860	ADD	5445	4.12043	0.612752	1.23984	13.6936	2.31082	0.020843	genitourinary
790.8	Elevated C-reactive protein (CRP)	LY6E	8	143017718	chr8:143017718:G:C	C	G	G	18	14602	ADD	7310	2.39902	0.37906	1.14124	5.04301	2.3085	0.0209712	symptoms
526	Diseases of the jaws	TMPRSS2	21	41508701	chr21:41508701:T:G	G	T	T	142	15118	ADD	7630	1.96669	0.293205	1.10703	3.49392	2.30676	0.0210681	digestive
364.41	Keratoconus	LY6E	8	143018292	chr8:143018292:C:A	C	A	A	36	14542	ADD	7289	2.36599	0.373556	1.13773	4.92021	2.3054	0.0211443	sense organs
743	Osteoporosis, osteopenia and pathological fracture	LY6E	8	143018292	chr8:143018292:C:A	C	A	A	824	15886	ADD	8355	0.743075	0.128823	0.577269	0.956505	-2.30516	0.0211578	musculoskeletal
771.2	Cramp of limb	DPP4	2	162073469	chr2:162073469:A:G	A	G	G	204	12886	ADD	6545	0.664276	0.17785	0.468773	0.941314	-2.30002	0.021447	symptoms
983	Toxic effect of corrosive aromatics, acids, and caustic alkalis	LY6E	8	143017718	chr8:143017718:G:C	C	G	G	8	16980	ADD	8494	2.82195	0.451367	1.16505	6.83523	2.29841	0.0215385	injuries & poisonings
733.4	Aseptic necrosis of bone	LY6E	8	143017718	chr8:143017718:G:C	C	G	G	216	14128	ADD	7172	1.45131	0.162187	1.0561	1.99441	2.29651	0.0216469	musculoskeletal
170	Cancer of bone and connective tissue	LY6E	8	143017718	chr8:143017718:G:C	C	G	G	52	17588	ADD	8820	1.94056	0.288756	1.10189	3.41756	2.29598	0.0216772	neoplasms
362	Other retinal disorders	LY6E	8	143018292	chr8:143018292:C:A	C	A	A	464	13982	ADD	7223	1.3656	0.135791	1.0465	1.782	2.29466	0.0217528	sense organs
788	Syncope and collapse	DPP4	2	162073199	chr2:162073199:T:G	T	G	G	1060	15266	ADD	8163	0.8326	0.0798761	0.711944	0.973704	-2.29358	0.0218146	symptoms
514.1	Abnormal results of function study of pulmonary system	ACE2	X	15674766	chrX:15674766:C:G	C	G	G	166	15268	ADD	7717	1.36399	0.135366	1.04614	1.77843	2.29315	0.0218392	respiratory
277.51	Lipoprotein disorders	TMPRSS2	21	41508700	chr21:41508700:G:A	G	A	A	122	16250	ADD	8186	2.6902	0.431803	1.15407	6.27098	2.29182	0.0219161	endocrine/metabolic
580.4	Renal sclerosis, NOS	LY6E	8	143018261	chr8:143018261:G:A	G	A	A	20	10540	ADD	5280	5.55661	0.749366	1.27923	24.1363	2.28859	0.0221034	genitourinary
558	Noninfectious gastroenteritis	TMPRSS2	21	41508701	chr21:41508701:T:G	G	T	T	400	12050	ADD	6225	1.57103	0.197499	1.06678	2.31365	2.28728	0.0221797	digestive
244	Hypothyroidism	LY6E	8	143017718	chr8:143017718:G:C	C	G	G	848	14014	ADD	7431	1.23082	0.090797	1.03016	1.47055	2.28726	0.0221804	endocrine/metabolic
963.1	Antineoplastic and immunosuppressive drugs causing adverse effects	ACE2	X	15674316	chrX:15674316:A:C	C	A	A	432	12966	ADD	6699	1.21031	0.0834728	1.02765	1.42544	2.28672	0.0222124	injuries & poisonings
963.1	Antineoplastic and immunosuppressive drugs causing adverse effects	ACE2	X	15674699	chrX:15674699:T:C	C	T	T	432	12966	ADD	6699	1.21031	0.0834728	1.02765	1.42544	2.28672	0.0222124	injuries & poisonings
963.1	Antineoplastic and immunosuppressive drugs causing adverse effects	ACE2	X	15675244	chrX:15675244:A:G	G	A	A	432	12966	ADD	6699	1.21031	0.0834728	1.02765	1.42544	2.28672	0.0222124	injuries & poisonings
963.1	Antineoplastic and immunosuppressive drugs causing adverse effects	ACE2	X	15675338	chrX:15675338:T:A	A	T	T	432	12966	ADD	6699	1.21031	0.0834728	1.02765	1.42544	2.28672	0.0222124	injuries & poisonings
753.2	Congenital anomalies of posterior segment of eye	LY6E	8	143017718	chr8:143017718:G:C	C	G	G	10	17474	ADD	8742	2.51132	0.402698	1.14058	5.5294	2.28659	0.0222196	congenital anomalies
272	Disorders of lipoid metabolism	ACE2	X	15674766	chrX:15674766:C:G	C	G	G	5790	8752	ADD	7271	1.08063	0.0339356	1.01109	1.15495	2.2851	0.022307	endocrine/metabolic
272	Disorders of lipoid metabolism	DPP4	2	162074215	chr2:162074215:T:G	G	T	T	5790	8752	ADD	7271	1.10002	0.0417434	1.01361	1.1938	2.2837	0.0223894	endocrine/metabolic
760	Back pain	DPP4	2	162073222	chr2:162073222:G:A	G	A	A	4894	10326	ADD	7610	0.903978	0.0442223	0.828926	0.985825	-2.28279	0.0224427	symptoms
474.2	Chronic tonsillitis and adenoiditis	TMPRSS2	21	41508701	chr21:41508701:T:G	G	T	T	162	10330	ADD	5246	1.88364	0.277444	1.09355	3.24458	2.28229	0.0224724	respiratory
525	Other diseases of the teeth and supporting structures	TMPRSS2	21	41508700	chr21:41508700:G:A	G	A	A	320	15118	ADD	7719	2.06963	0.318795	1.10798	3.86591	2.28162	0.0225117	digestive
189.1	Cancer of kidney and renal pelvis	ACE2	X	15674316	chrX:15674316:A:C	C	A	A	256	17146	ADD	8701	0.76226	0.118998	0.603687	0.962486	-2.28128	0.0225319	neoplasms
189.1	Cancer of kidney and renal pelvis	ACE2	X	15674699	chrX:15674699:T:C	C	T	T	256	17146	ADD	8701	0.76226	0.118998	0.603687	0.962486	-2.28128	0.0225319	neoplasms
189.1	Cancer of kidney and renal pelvis	ACE2	X	15675338	chrX:15675338:T:A	A	T	T	256	17146	ADD	8701	0.76226	0.118998	0.603687	0.962486	-2.28128	0.0225319	neoplasms
930	Allergic reaction to food	LY6E	8	143018292	chr8:143018292:C:A	C	A	A	418	12656	ADD	6537	1.38088	0.14156	1.04631	1.82244	2.27977	0.0226216	injuries & poisonings
703	Diseases of nail, NOS	LY6E	8	143018292	chr8:143018292:C:A	C	A	A	160	15434	ADD	7797	0.471704	0.329898	0.247093	0.900492	-2.27768	0.0227457	dermatologic
189.1	Cancer of kidney and renal pelvis	ACE2	X	15675244	chrX:15675244:A:G	G	A	A	256	17146	ADD	8701	0.762658	0.119015	0.603983	0.963021	-2.27656	0.0228123	neoplasms
270.32	Paraproteinemia	DPP4	2	162073469	chr2:162073469:A:G	A	G	G	206	15522	ADD	7864	1.40772	0.150381	1.04836	1.89026	2.27404	0.0229635	endocrine/metabolic
277.4	Disorders of bilirubin excretion	TMPRSS2	21	41508700	chr21:41508700:G:A	G	A	A	86	16250	ADD	8168	2.87685	0.464867	1.1567	7.15506	2.27312	0.023019	endocrine/metabolic
352	Disorders of other cranial nerves	TMPRSS2	21	41508701	chr21:41508701:T:G	G	T	T	126	14182	ADD	7154	2.01886	0.30909	1.10156	3.70003	2.27291	0.0230317	neurological
1004	Other signs and symptoms involving emotional state	TMPRSS2	21	41508701	chr21:41508701:T:G	G	T	T	46	17578	ADD	8812	2.63844	0.426924	1.14274	6.0918	2.27251	0.0230559	NULL
459.1	Hemorrhage NOS	ACE2	X	15674766	chrX:15674766:C:G	C	G	G	36	12600	ADD	6318	0.505158	0.300683	0.280211	0.910687	-2.27111	0.0231403	circulatory system
772	Symptoms of the muscles	ACE2	X	15674766	chrX:15674766:C:G	C	G	G	64	14980	ADD	7522	0.593672	0.229611	0.378531	0.93109	-2.27092	0.0231518	symptoms
244.4	Hypothyroidism NOS	LY6E	8	143017718	chr8:143017718:G:C	C	G	G	1066	14014	ADD	7540	1.20391	0.0817554	1.02566	1.41314	2.26989	0.0232145	endocrine/metabolic
079	Viral infection	LY6E	8	143017718	chr8:143017718:G:C	C	G	G	636	12338	ADD	6487	0.77236	0.113944	0.617775	0.965626	-2.26694	0.0233938	infectious diseases
288.11	Neutropenia	TMPRSS2	21	41508700	chr21:41508700:G:A	G	A	A	194	13698	ADD	6946	2.21075	0.350136	1.11302	4.39112	2.26578	0.0234651	hematopoietic
797.1	Cardiogenic shock	DPP4	2	162073199	chr2:162073199:T:G	T	G	G	154	17032	ADD	8593	1.48572	0.174768	1.05481	2.09266	2.26527	0.0234964	symptoms
450	Noninfectious disorders of lymphatic channels	LY6E	8	143018292	chr8:143018292:C:A	C	A	A	242	17296	ADD	8769	1.48431	0.17452	1.05432	2.08966	2.26306	0.0236322	circulatory system
853	Complication of colostomy or enterostomy	LY6E	8	143018261	chr8:143018261:G:A	G	A	A	18	14420	ADD	7219	5.36903	0.742697	1.25231	23.0187	2.2629	0.023642	injuries & poisonings
536	Disorders of function of stomach	TMPRSS2	21	41508700	chr21:41508700:G:A	G	A	A	360	14340	ADD	7350	1.92229	0.288817	1.09138	3.38578	2.26274	0.023652	digestive
281.11	Pernicious anemia	LY6E	8	143018292	chr8:143018292:C:A	C	A	A	52	8724	ADD	4388	2.12335	0.33289	1.10577	4.07735	2.262	0.0236976	hematopoietic
371.1	Uveitis, noninfectious or NOS	DPP4	2	162073199	chr2:162073199:T:G	T	G	G	262	14556	ADD	7409	1.36939	0.138992	1.04284	1.79819	2.26175	0.0237131	sense organs
281.1	Megaloblastic anemia	LY6E	8	143018292	chr8:143018292:C:A	C	A	A	88	8724	ADD	4406	1.82982	0.267325	1.08358	3.08998	2.26024	0.0238064	hematopoietic
452	Other venous embolism and thrombosis	LY6E	8	143018292	chr8:143018292:C:A	C	A	A	1244	11138	ADD	6191	1.22689	0.0904724	1.02754	1.46493	2.26021	0.0238085	circulatory system
348.8	Encephalopathy, not elsewhere classified	DPP4	2	162074215	chr2:162074215:T:G	G	T	T	92	14406	ADD	7249	0.580481	0.240662	0.36219	0.930337	-2.26	0.023821	neurological
302.1	Decreased libido	DPP4	2	162073199	chr2:162073199:T:G	T	G	G	62	7042	ADD	3552	1.80115	0.26043	1.08111	3.00074	2.25943	0.0238564	mental disorders
716.8	Palindromic rheumatism	TMPRSS2	21	41508701	chr21:41508701:T:G	G	T	T	4	14484	ADD	7244	3.66529	0.575055	1.18747	11.3135	2.25875	0.0238986	musculoskeletal
172	Skin cancer	LY6E	8	143018261	chr8:143018261:G:A	G	A	A	42	16746	ADD	8394	4.00863	0.614999	1.2009	13.3809	2.25765	0.0239678	neoplasms
446	Polyarteritis nodosa and allied conditions	LY6E	8	143018261	chr8:143018261:G:A	G	A	A	58	14400	ADD	7229	3.14672	0.507869	1.16294	8.51445	2.2572	0.0239958	circulatory system
401.3	Other hypertensive complications	ACE2	X	15674316	chrX:15674316:A:C	C	A	A	846	5666	ADD	3256	0.845799	0.0742034	0.731316	0.978203	-2.25696	0.0240108	circulatory system
401.3	Other hypertensive complications	ACE2	X	15674699	chrX:15674699:T:C	C	T	T	846	5666	ADD	3256	0.845799	0.0742034	0.731316	0.978203	-2.25696	0.0240108	circulatory system
401.3	Other hypertensive complications	ACE2	X	15675244	chrX:15675244:A:G	G	A	A	846	5666	ADD	3256	0.845799	0.0742034	0.731316	0.978203	-2.25696	0.0240108	circulatory system
401.3	Other hypertensive complications	ACE2	X	15675338	chrX:15675338:T:A	A	T	T	846	5666	ADD	3256	0.845799	0.0742034	0.731316	0.978203	-2.25696	0.0240108	circulatory system
797	Shock	DPP4	2	162073222	chr2:162073222:G:A	G	A	A	134	17032	ADD	8583	1.47554	0.172417	1.05242	2.06877	2.2563	0.0240521	symptoms
526	Diseases of the jaws	DPP4	2	162074215	chr2:162074215:T:G	G	T	T	142	15118	ADD	7630	1.45699	0.166953	1.05038	2.02101	2.25438	0.0241724	digestive
216	Benign neoplasm of skin	DPP4	2	162073469	chr2:162073469:A:G	A	G	G	314	8028	ADD	4171	1.32796	0.125889	1.03759	1.69958	2.25311	0.0242519	neoplasms
979	Adverse drug events and drug allergies	DPP4	2	162073469	chr2:162073469:A:G	A	G	G	418	12966	ADD	6692	1.27757	0.108743	1.03234	1.58106	2.25266	0.0242809	injuries & poisonings
277.5	Other disorders of lipoid metabolism	LY6E	8	143018292	chr8:143018292:C:A	C	A	A	124	16250	ADD	8187	1.68097	0.230595	1.06974	2.64146	2.25232	0.0243023	endocrine/metabolic
525	Other diseases of the teeth and supporting structures	LY6E	8	143018261	chr8:143018261:G:A	G	A	A	320	15118	ADD	7719	2.19566	0.349442	1.10693	4.35523	2.25068	0.0244057	digestive
457	Encounter for long-term (current) use of anticoagulants, antithrombotics, aspirin	TMPRSS2	21	41508701	chr21:41508701:T:G	G	T	T	514	11138	ADD	5826	1.51774	0.185402	1.05532	2.1828	2.25038	0.0244249	circulatory system
609.1	Infertility, male	TMPRSS2	21	41508701	chr21:41508701:T:G	G	T	T	56	14468	ADD	7262	2.16703	0.343825	1.10459	4.25137	2.24928	0.0244945	genitourinary
696	Psoriasis and related disorders	DPP4	2	162073469	chr2:162073469:A:G	A	G	G	132	13140	ADD	6636	1.51485	0.184688	1.05478	2.17559	2.24874	0.0245291	dermatologic
557	Intestinal malabsorption (non-celiac)	ACE2	X	15674316	chrX:15674316:A:C	C	A	A	42	12050	ADD	6046	0.426794	0.378798	0.203135	0.89671	-2.24778	0.0245905	digestive
557	Intestinal malabsorption (non-celiac)	ACE2	X	15674699	chrX:15674699:T:C	C	T	T	42	12050	ADD	6046	0.426794	0.378798	0.203135	0.89671	-2.24778	0.0245905	digestive
557	Intestinal malabsorption (non-celiac)	ACE2	X	15675338	chrX:15675338:T:A	A	T	T	42	12050	ADD	6046	0.426794	0.378798	0.203135	0.89671	-2.24778	0.0245905	digestive
710.19	Unspecified osteomyelitis	DPP4	2	162073469	chr2:162073469:A:G	A	G	G	190	14484	ADD	7337	1.4114	0.153368	1.04497	1.90632	2.24675	0.0246562	musculoskeletal
743	Osteoporosis, osteopenia and pathological fracture	TMPRSS2	21	41508700	chr21:41508700:G:A	G	A	A	824	15886	ADD	8355	1.65093	0.223145	1.06607	2.55664	2.2467	0.0246593	musculoskeletal
475	Chronic sinusitis	LY6E	8	143017718	chr8:143017718:G:C	C	G	G	994	10330	ADD	5662	1.20733	0.0838667	1.02433	1.42303	2.24661	0.0246652	respiratory
560	Intestinal obstruction without mention of hernia	TMPRSS2	21	41508701	chr21:41508701:T:G	G	T	T	246	12050	ADD	6148	1.70848	0.238449	1.07063	2.72633	2.2462	0.0246914	digestive
588.2	Secondary hyperparathyroidism (of renal origin)	LY6E	8	143018292	chr8:143018292:C:A	C	A	A	702	10540	ADD	5621	1.29549	0.115259	1.03354	1.62384	2.24617	0.0246934	genitourinary
613	Other nonmalignant breast conditions	LY6E	8	143017718	chr8:143017718:G:C	C	G	G	380	16084	ADD	8232	1.32341	0.124801	1.03625	1.69015	2.24525	0.0247523	genitourinary
526.9	Jaw disease NOS	DPP4	2	162073469	chr2:162073469:A:G	A	G	G	30	15118	ADD	7574	2.01767	0.312704	1.09314	3.72412	2.24475	0.0247843	digestive
557	Intestinal malabsorption (non-celiac)	ACE2	X	15675244	chrX:15675244:A:G	G	A	A	42	12050	ADD	6046	0.427849	0.378387	0.203801	0.898201	-2.2437	0.0248518	digestive
695.9	Unspecified erythematous condition	TMPRSS2	21	41508700	chr21:41508700:G:A	G	A	A	106	13610	ADD	6858	2.58761	0.424179	1.12677	5.94239	2.24135	0.0250032	dermatologic
509	Respiratory failure, insufficiency, arrest	DPP4	2	162073222	chr2:162073222:G:A	G	A	A	410	14020	ADD	7215	1.30096	0.117389	1.03358	1.63752	2.2413	0.0250064	respiratory
198.6	Secondary malignancy of bone	TMPRSS2	21	41508701	chr21:41508701:T:G	G	T	T	164	15350	ADD	7757	1.85014	0.275021	1.07921	3.17177	2.23714	0.0252775	neoplasms
253.1	Pituitary hyperfunction	LY6E	8	143017718	chr8:143017718:G:C	C	G	G	72	14812	ADD	7442	1.75128	0.250566	1.0717	2.86179	2.23633	0.0253303	endocrine/metabolic
041.11	Methicillin sensitive Staphylococcus aureus	DPP4	2	162073469	chr2:162073469:A:G	A	G	G	98	13970	ADD	7034	0.531729	0.282445	0.305684	0.924928	-2.23626	0.0253346	infectious diseases
726.4	Calcaneal spur; Exostosis NOS	TMPRSS2	21	41508701	chr21:41508701:T:G	G	T	T	70	11508	ADD	5789	2.31312	0.375031	1.1091	4.8242	2.23608	0.0253464	musculoskeletal
577	Diseases of pancreas	DPP4	2	162073469	chr2:162073469:A:G	A	G	G	330	17022	ADD	8676	1.30985	0.120756	1.0338	1.65963	2.2352	0.0254041	digestive
272	Disorders of lipoid metabolism	ACE2	X	15674316	chrX:15674316:A:C	C	A	A	5790	8752	ADD	7271	0.920198	0.0372372	0.855431	0.989869	-2.23341	0.0255219	endocrine/metabolic
272	Disorders of lipoid metabolism	ACE2	X	15674699	chrX:15674699:T:C	C	T	T	5790	8752	ADD	7271	0.920198	0.0372372	0.855431	0.989869	-2.23341	0.0255219	endocrine/metabolic
272	Disorders of lipoid metabolism	ACE2	X	15675244	chrX:15675244:A:G	G	A	A	5790	8752	ADD	7271	0.920198	0.0372372	0.855431	0.989869	-2.23341	0.0255219	endocrine/metabolic
272	Disorders of lipoid metabolism	ACE2	X	15675338	chrX:15675338:T:A	A	T	T	5790	8752	ADD	7271	0.920198	0.0372372	0.855431	0.989869	-2.23341	0.0255219	endocrine/metabolic
741.3	Difficulty in walking	LY6E	8	143018261	chr8:143018261:G:A	G	A	A	186	14448	ADD	7317	2.41921	0.396174	1.11288	5.25893	2.22993	0.0257522	musculoskeletal
345.11	Generalized convulsive epilepsy	TMPRSS2	21	41508701	chr21:41508701:T:G	G	T	T	82	14406	ADD	7244	2.19062	0.351818	1.09925	4.3655	2.22894	0.0258177	neurological
288.2	Elevated white blood cell count	LY6E	8	143018261	chr8:143018261:G:A	G	A	A	424	13698	ADD	7061	1.96795	0.303771	1.08504	3.56932	2.22864	0.025838	hematopoietic
300.8	Acute reaction to stress	DPP4	2	162074215	chr2:162074215:T:G	G	T	T	96	7042	ADD	3569	0.586211	0.23967	0.366477	0.937693	-2.22838	0.0258549	mental disorders
427.6	Premature beats	LY6E	8	143018292	chr8:143018292:C:A	C	A	A	544	8980	ADD	4762	1.3311	0.128362	1.03502	1.71188	2.22813	0.025872	circulatory system
726	Peripheral enthesopathies and allied syndromes	LY6E	8	143017718	chr8:143017718:G:C	C	G	G	1546	11508	ADD	6527	1.1674	0.0695178	1.0187	1.3378	2.22641	0.0259868	musculoskeletal
614.32	Chronic inflammatory pelvic disease	LY6E	8	143018261	chr8:143018261:G:A	G	A	A	38	14548	ADD	7293	4.23584	0.648791	1.18765	15.1075	2.22503	0.0260789	genitourinary
550.4	Umbilical hernia	LY6E	8	143018261	chr8:143018261:G:A	G	A	A	312	14972	ADD	7642	2.17183	0.348572	1.09678	4.30061	2.22499	0.0260821	digestive
614	Inflammatory diseases of female pelvic organs	DPP4	2	162073222	chr2:162073222:G:A	G	A	A	1146	14548	ADD	7847	0.830179	0.0836586	0.70463	0.978097	-2.22469	0.0261021	genitourinary
1009	Injury, NOS	ACE2	X	15674316	chrX:15674316:A:C	C	A	A	1346	14966	ADD	8156	0.879938	0.0575563	0.786068	0.985017	-2.22224	0.0262668	NULL
1009	Injury, NOS	ACE2	X	15674699	chrX:15674699:T:C	C	T	T	1346	14966	ADD	8156	0.879938	0.0575563	0.786068	0.985017	-2.22224	0.0262668	NULL
1009	Injury, NOS	ACE2	X	15675338	chrX:15675338:T:A	A	T	T	1346	14966	ADD	8156	0.879938	0.0575563	0.786068	0.985017	-2.22224	0.0262668	NULL
755.4	Congenital anomalies of upper limb, including shoulder girdle	DPP4	2	162073222	chr2:162073222:G:A	G	A	A	8	17192	ADD	8600	2.73264	0.452586	1.12548	6.63474	2.22116	0.0263401	congenital anomalies
791	Gangrene	DPP4	2	162073469	chr2:162073469:A:G	A	G	G	80	17544	ADD	8812	1.65179	0.226038	1.06059	2.57251	2.22023	0.0264033	symptoms
199	Neoplasm of uncertain behavior	DPP4	2	162074215	chr2:162074215:T:G	G	T	T	484	15350	ADD	7917	1.23688	0.0957652	1.0252	1.49225	2.21989	0.0264263	neoplasms
531.5	Gastrojejunal ulcer	TMPRSS2	21	41508700	chr21:41508700:G:A	G	A	A	38	16886	ADD	8462	3.831	0.605364	1.16957	12.5487	2.21871	0.0265066	digestive
386.9	Dizziness and giddiness (Light-headedness and vertigo)	ACE2	X	15675734	chrX:15675734:C:T	C	T	T	2344	12818	ADD	7581	1.09367	0.040375	1.01046	1.18373	2.21771	0.0265747	sense organs
327.32	Obstructive sleep apnea	LY6E	8	143018292	chr8:143018292:C:A	C	A	A	3414	10772	ADD	7093	1.14496	0.061046	1.01585	1.29048	2.2175	0.026589	neurological
250.4	Abnormal glucose	ACE2	X	15674316	chrX:15674316:A:C	C	A	A	1884	9124	ADD	5504	0.893822	0.0506222	0.809396	0.987053	-2.21739	0.0265966	endocrine/metabolic
250.4	Abnormal glucose	ACE2	X	15674699	chrX:15674699:T:C	C	T	T	1884	9124	ADD	5504	0.893822	0.0506222	0.809396	0.987053	-2.21739	0.0265966	endocrine/metabolic
250.4	Abnormal glucose	ACE2	X	15675244	chrX:15675244:A:G	G	A	A	1884	9124	ADD	5504	0.893822	0.0506222	0.809396	0.987053	-2.21739	0.0265966	endocrine/metabolic
250.4	Abnormal glucose	ACE2	X	15675338	chrX:15675338:T:A	A	T	T	1884	9124	ADD	5504	0.893822	0.0506222	0.809396	0.987053	-2.21739	0.0265966	endocrine/metabolic
562.1	Diverticulosis	DPP4	2	162073222	chr2:162073222:G:A	G	A	A	794	12050	ADD	6422	1.22001	0.0896915	1.02333	1.45448	2.21711	0.0266155	digestive
603	Other disorders of testis	DPP4	2	162073222	chr2:162073222:G:A	G	A	A	48	14468	ADD	7258	1.89469	0.288316	1.07677	3.3339	2.21651	0.0266565	genitourinary
740.2	Osteoarthrosis, generalized	ACE2	X	15674316	chrX:15674316:A:C	C	A	A	814	11812	ADD	6313	0.838459	0.0795012	0.717481	0.979836	-2.21619	0.0266785	musculoskeletal
740.2	Osteoarthrosis, generalized	ACE2	X	15674699	chrX:15674699:T:C	C	T	T	814	11812	ADD	6313	0.838459	0.0795012	0.717481	0.979836	-2.21619	0.0266785	musculoskeletal
740.2	Osteoarthrosis, generalized	ACE2	X	15675338	chrX:15675338:T:A	A	T	T	814	11812	ADD	6313	0.838459	0.0795012	0.717481	0.979836	-2.21619	0.0266785	musculoskeletal
740.9	Osteoarthrosis NOS	LY6E	8	143018292	chr8:143018292:C:A	C	A	A	2110	11812	ADD	6961	0.831216	0.0834187	0.705843	0.978859	-2.21611	0.0266836	musculoskeletal
376	Disorders of the orbit	ACE2	X	15675244	chrX:15675244:A:G	G	A	A	18	14222	ADD	7120	1.79684	0.264442	1.07008	3.01719	2.2161	0.0266844	sense organs
1009	Injury, NOS	ACE2	X	15675244	chrX:15675244:A:G	G	A	A	1346	14966	ADD	8156	0.880273	0.0575604	0.78636	0.9854	-2.21547	0.0267276	NULL
170.2	Cancer of connective tissue	DPP4	2	162074215	chr2:162074215:T:G	G	T	T	76	17588	ADD	8832	1.62601	0.219454	1.05761	2.49991	2.21519	0.0267474	neoplasms
270.32	Paraproteinemia	DPP4	2	162073199	chr2:162073199:T:G	T	G	G	206	15522	ADD	7864	1.40456	0.153387	1.03987	1.89716	2.21482	0.0267724	endocrine/metabolic
376	Disorders of the orbit	ACE2	X	15674316	chrX:15674316:A:C	C	A	A	18	14222	ADD	7120	1.79541	0.264281	1.06957	3.01385	2.21445	0.0267981	sense organs
376	Disorders of the orbit	ACE2	X	15674699	chrX:15674699:T:C	C	T	T	18	14222	ADD	7120	1.79541	0.264281	1.06957	3.01385	2.21445	0.0267981	sense organs
376	Disorders of the orbit	ACE2	X	15675338	chrX:15675338:T:A	A	T	T	18	14222	ADD	7120	1.79541	0.264281	1.06957	3.01385	2.21445	0.0267981	sense organs
575	Other biliary tract disease	ACE2	X	15675244	chrX:15675244:A:G	G	A	A	102	16340	ADD	8221	1.42644	0.160417	1.04161	1.95344	2.21411	0.0268214	digestive
353	Nerve root and plexus disorders	DPP4	2	162074215	chr2:162074215:T:G	G	T	T	70	14182	ADD	7126	1.65994	0.22893	1.0598	2.59991	2.21369	0.0268504	neurological
743.13	Other specified osteoporosis	DPP4	2	162073222	chr2:162073222:G:A	G	A	A	44	15886	ADD	7965	1.88698	0.286938	1.07529	3.31138	2.21294	0.0269019	musculoskeletal
217.1	Nevus, non-neoplastic	ACE2	X	15674316	chrX:15674316:A:C	C	A	A	22	8028	ADD	4025	1.98336	0.3096	1.08111	3.63859	2.21187	0.0269758	neoplasms
217.1	Nevus, non-neoplastic	ACE2	X	15674699	chrX:15674699:T:C	C	T	T	22	8028	ADD	4025	1.98336	0.3096	1.08111	3.63859	2.21187	0.0269758	neoplasms
217.1	Nevus, non-neoplastic	ACE2	X	15675244	chrX:15675244:A:G	G	A	A	22	8028	ADD	4025	1.98336	0.3096	1.08111	3.63859	2.21187	0.0269758	neoplasms
217.1	Nevus, non-neoplastic	ACE2	X	15675338	chrX:15675338:T:A	A	T	T	22	8028	ADD	4025	1.98336	0.3096	1.08111	3.63859	2.21187	0.0269758	neoplasms
575	Other biliary tract disease	ACE2	X	15674316	chrX:15674316:A:C	C	A	A	102	16340	ADD	8221	1.42554	0.160435	1.04092	1.95227	2.20993	0.0271102	digestive
575	Other biliary tract disease	ACE2	X	15674699	chrX:15674699:T:C	C	T	T	102	16340	ADD	8221	1.42554	0.160435	1.04092	1.95227	2.20993	0.0271102	digestive
575	Other biliary tract disease	ACE2	X	15675338	chrX:15675338:T:A	A	T	T	102	16340	ADD	8221	1.42554	0.160435	1.04092	1.95227	2.20993	0.0271102	digestive
740.2	Osteoarthrosis, generalized	ACE2	X	15675244	chrX:15675244:A:G	G	A	A	814	11812	ADD	6313	0.838883	0.0795101	0.717831	0.980348	-2.20959	0.027134	musculoskeletal
686.1	Carbuncle and furuncle	TMPRSS2	21	41508700	chr21:41508700:G:A	G	A	A	256	13750	ADD	7003	2.08603	0.332799	1.08653	4.00498	2.20933	0.0271518	dermatologic
713.5	Arthropathy associated with neurological disorders	DPP4	2	162073469	chr2:162073469:A:G	A	G	G	26	14484	ADD	7255	2.01238	0.316549	1.08209	3.74246	2.20919	0.0271614	musculoskeletal
500.1	Extrinsic allergic alveolitis	TMPRSS2	21	41508701	chr21:41508701:T:G	G	T	T	8	14020	ADD	7014	4.02661	0.630596	1.16997	13.8581	2.2089	0.0271814	respiratory
509.8	Dependence on respirator [Ventilator] or supplemental oxygen	DPP4	2	162073469	chr2:162073469:A:G	A	G	G	452	14020	ADD	7236	1.26483	0.106386	1.02678	1.55808	2.20839	0.0272173	respiratory
381	Otitis media and Eustachian tube disorders	DPP4	2	162073469	chr2:162073469:A:G	A	G	G	328	15516	ADD	7922	1.30426	0.12029	1.03032	1.65103	2.20827	0.0272252	sense organs
800.2	Fracture of unspecified part of femur	DPP4	2	162073199	chr2:162073199:T:G	T	G	G	46	15624	ADD	7835	1.78615	0.262683	1.06739	2.98891	2.20822	0.027229	injuries & poisonings
185	Cancer of prostate	LY6E	8	143017718	chr8:143017718:G:C	C	G	G	876	15234	ADD	8055	0.776676	0.114455	0.620606	0.971995	-2.20814	0.0272348	neoplasms
208	Benign neoplasm of colon	TMPRSS2	21	41508700	chr21:41508700:G:A	G	A	A	2352	13840	ADD	8096	1.42044	0.158998	1.04012	1.93983	2.20738	0.0272878	neoplasms
987	Toxic effect of other gases, fumes, or vapors	TMPRSS2	21	41508700	chr21:41508700:G:A	G	A	A	2	16980	ADD	8491	5.04237	0.732948	1.1988	21.2091	2.20735	0.0272894	injuries & poisonings
216	Benign neoplasm of skin	DPP4	2	162073199	chr2:162073199:T:G	T	G	G	314	8028	ADD	4171	1.32952	0.129102	1.03229	1.71233	2.20615	0.0273737	neoplasms
536.7	Complications of gastrostomy, colostomy and enterostomy	TMPRSS2	21	41508700	chr21:41508700:G:A	G	A	A	40	14340	ADD	7190	3.93086	0.620749	1.16441	13.27	2.20517	0.0274421	digestive
535	Gastritis and duodenitis	DPP4	2	162073469	chr2:162073469:A:G	A	G	G	426	14340	ADD	7383	1.26923	0.108133	1.02683	1.56885	2.20479	0.027469	digestive
758.1	Chromosomal anomalies	ACE2	X	15675244	chrX:15675244:A:G	G	A	A	16	17180	ADD	8598	1.99482	0.313337	1.07942	3.68653	2.20387	0.0275334	congenital anomalies
348.8	Encephalopathy, not elsewhere classified	LY6E	8	143017718	chr8:143017718:G:C	C	G	G	92	14406	ADD	7249	1.6455	0.226012	1.05661	2.56259	2.20361	0.0275517	neurological
758.1	Chromosomal anomalies	ACE2	X	15674316	chrX:15674316:A:C	C	A	A	16	17180	ADD	8598	1.98968	0.312696	1.078	3.67241	2.20014	0.0277967	congenital anomalies
758.1	Chromosomal anomalies	ACE2	X	15674699	chrX:15674699:T:C	C	T	T	16	17180	ADD	8598	1.98968	0.312696	1.078	3.67241	2.20014	0.0277967	congenital anomalies
758.1	Chromosomal anomalies	ACE2	X	15675338	chrX:15675338:T:A	A	T	T	16	17180	ADD	8598	1.98968	0.312696	1.078	3.67241	2.20014	0.0277967	congenital anomalies
759	Other and unspecified congenital anomalies	TMPRSS2	21	41508700	chr21:41508700:G:A	G	A	A	60	17180	ADD	8620	3.18297	0.526756	1.13359	8.93735	2.19801	0.0279484	congenital anomalies
1011	Complications of surgical and medical procedures	DPP4	2	162073199	chr2:162073199:T:G	T	G	G	364	16660	ADD	8512	0.73753	0.138519	0.562175	0.967581	-2.19788	0.0279578	NULL
272.13	Mixed hyperlipidemia	ACE2	X	15674316	chrX:15674316:A:C	C	A	A	2942	8752	ADD	5847	0.906318	0.0447753	0.830171	0.989449	-2.19686	0.0280301	endocrine/metabolic
272.13	Mixed hyperlipidemia	ACE2	X	15674699	chrX:15674699:T:C	C	T	T	2942	8752	ADD	5847	0.906318	0.0447753	0.830171	0.989449	-2.19686	0.0280301	endocrine/metabolic
272.13	Mixed hyperlipidemia	ACE2	X	15675244	chrX:15675244:A:G	G	A	A	2942	8752	ADD	5847	0.906318	0.0447753	0.830171	0.989449	-2.19686	0.0280301	endocrine/metabolic
272.13	Mixed hyperlipidemia	ACE2	X	15675338	chrX:15675338:T:A	A	T	T	2942	8752	ADD	5847	0.906318	0.0447753	0.830171	0.989449	-2.19686	0.0280301	endocrine/metabolic
381	Otitis media and Eustachian tube disorders	DPP4	2	162073199	chr2:162073199:T:G	T	G	G	328	15516	ADD	7922	1.31101	0.123296	1.02957	1.66938	2.1963	0.0280707	sense organs
539	Bariatric surgery	DPP4	2	162073222	chr2:162073222:G:A	G	A	A	2430	14108	ADD	8269	0.88288	0.0567171	0.789994	0.986687	-2.19627	0.0280729	digestive
738.4	Acquired spondylolisthesis	DPP4	2	162073199	chr2:162073199:T:G	T	G	G	168	15480	ADD	7824	1.44142	0.166512	1.04006	1.99768	2.19583	0.0281044	musculoskeletal
340.1	Migrain with aura	LY6E	8	143017718	chr8:143017718:G:C	C	G	G	184	14020	ADD	7102	1.46336	0.173498	1.04153	2.05605	2.19447	0.0282015	neurological
281	Other deficiency anemia	LY6E	8	143018292	chr8:143018292:C:A	C	A	A	116	8724	ADD	4420	1.69494	0.240642	1.05759	2.71637	2.19266	0.0283316	hematopoietic
364.1	Corneal opacity	LY6E	8	143018292	chr8:143018292:C:A	C	A	A	32	14542	ADD	7287	2.21708	0.363119	1.08816	4.51719	2.19264	0.0283333	sense organs
512.8	Cough	ACE2	X	15674316	chrX:15674316:A:C	C	A	A	3462	7326	ADD	5394	0.913151	0.0414459	0.841907	0.990425	-2.1921	0.0283722	respiratory
512.8	Cough	ACE2	X	15674699	chrX:15674699:T:C	C	T	T	3462	7326	ADD	5394	0.913151	0.0414459	0.841907	0.990425	-2.1921	0.0283722	respiratory
512.8	Cough	ACE2	X	15675244	chrX:15675244:A:G	G	A	A	3462	7326	ADD	5394	0.913151	0.0414459	0.841907	0.990425	-2.1921	0.0283722	respiratory
512.8	Cough	ACE2	X	15675338	chrX:15675338:T:A	A	T	T	3462	7326	ADD	5394	0.913151	0.0414459	0.841907	0.990425	-2.1921	0.0283722	respiratory
157	Pancreatic cancer	TMPRSS2	21	41508701	chr21:41508701:T:G	G	T	T	56	16170	ADD	8113	2.41009	0.401317	1.09757	5.29218	2.19194	0.0283839	neoplasms
622.1	Polyp of corpus uteri	TMPRSS2	21	41508700	chr21:41508700:G:A	G	A	A	152	16764	ADD	8458	2.37064	0.393798	1.09563	5.12941	2.19188	0.0283881	genitourinary
626.14	Irregular menstrual bleeding	TMPRSS2	21	41508700	chr21:41508700:G:A	G	A	A	130	12686	ADD	6408	2.56071	0.429215	1.10411	5.93894	2.19071	0.0284727	genitourinary
771.2	Cramp of limb	DPP4	2	162073199	chr2:162073199:T:G	T	G	G	204	12886	ADD	6545	0.666505	0.185339	0.463493	0.958439	-2.189	0.0285967	symptoms
592.2	Urethritis and urethral syndrome	DPP4	2	162074215	chr2:162074215:T:G	G	T	T	36	11610	ADD	5823	1.90454	0.294975	1.06834	3.39526	2.18406	0.0289581	genitourinary
994.2	Sepsis	DPP4	2	162073469	chr2:162073469:A:G	A	G	G	814	15854	ADD	8334	1.19227	0.0805311	1.01818	1.39612	2.18371	0.0289832	injuries & poisonings
276.13	Hyperpotassemia	DPP4	2	162074215	chr2:162074215:T:G	G	T	T	1042	11046	ADD	6044	1.16298	0.0691541	1.01557	1.33179	2.18333	0.0290114	endocrine/metabolic
1005	Other symptoms	TMPRSS2	21	41508700	chr21:41508700:G:A	G	A	A	212	17020	ADD	8616	2.13792	0.348102	1.08066	4.22958	2.18279	0.0290509	NULL
627.5	Premature menopause and other ovarian failure	TMPRSS2	21	41508700	chr21:41508700:G:A	G	A	A	34	12686	ADD	6360	3.708	0.600381	1.14313	12.0278	2.18277	0.0290526	genitourinary
252.2	Hypoparathyroidism	ACE2	X	15674316	chrX:15674316:A:C	C	A	A	40	14812	ADD	7426	0.406265	0.412986	0.180832	0.912733	-2.18107	0.0291785	endocrine/metabolic
252.2	Hypoparathyroidism	ACE2	X	15674699	chrX:15674699:T:C	C	T	T	40	14812	ADD	7426	0.406265	0.412986	0.180832	0.912733	-2.18107	0.0291785	endocrine/metabolic
252.2	Hypoparathyroidism	ACE2	X	15675244	chrX:15675244:A:G	G	A	A	40	14812	ADD	7426	0.406265	0.412986	0.180832	0.912733	-2.18107	0.0291785	endocrine/metabolic
252.2	Hypoparathyroidism	ACE2	X	15675338	chrX:15675338:T:A	A	T	T	40	14812	ADD	7426	0.406265	0.412986	0.180832	0.912733	-2.18107	0.0291785	endocrine/metabolic
871.2	Open wound of finger(s)	LY6E	8	143017718	chr8:143017718:G:C	C	G	G	130	15452	ADD	7791	0.548841	0.275185	0.320043	0.941205	-2.18016	0.0292458	injuries & poisonings
758	Chromosomal anomalies and genetic disorders	TMPRSS2	21	41508701	chr21:41508701:T:G	G	T	T	16	17180	ADD	8598	3.04085	0.510216	1.11866	8.26594	2.17974	0.0292767	congenital anomalies
701.4	Keloid scar	DPP4	2	162073469	chr2:162073469:A:G	A	G	G	180	15778	ADD	7979	1.40764	0.15689	1.03502	1.91442	2.17935	0.0293059	dermatologic
427	Cardiac dysrhythmias	TMPRSS2	21	41508700	chr21:41508700:G:A	G	A	A	3288	8980	ADD	6134	0.681702	0.17584	0.482969	0.962209	-2.17904	0.0293283	circulatory system
963.1	Antineoplastic and immunosuppressive drugs causing adverse effects	TMPRSS2	21	41508700	chr21:41508700:G:A	G	A	A	432	12966	ADD	6699	1.854	0.283316	1.06402	3.23049	2.179	0.0293316	injuries & poisonings
070.9	Hepatitis NOS	DPP4	2	162074215	chr2:162074215:T:G	G	T	T	74	12338	ADD	6206	0.556568	0.269165	0.328401	0.94326	-2.17698	0.029482	infectious diseases
851	Complications of transplants and reattached limbs	DPP4	2	162074215	chr2:162074215:T:G	G	T	T	664	14420	ADD	7542	1.19539	0.0820052	1.01791	1.40383	2.17639	0.0295258	injuries & poisonings
1100	Family history	LY6E	8	143017718	chr8:143017718:G:C	C	G	G	220	16856	ADD	8538	1.41677	0.160097	1.0352	1.93898	2.17603	0.0295527	NULL
272.1	Hyperlipidemia	DPP4	2	162074215	chr2:162074215:T:G	G	T	T	7020	8752	ADD	7886	1.08939	0.0393512	1.00853	1.17674	2.17583	0.0295683	endocrine/metabolic
418	Nonspecific chest pain	ACE2	X	15675734	chrX:15675734:C:T	C	T	T	5352	9748	ADD	7550	1.06709	0.029874	1.00641	1.13144	2.17374	0.0297243	circulatory system
696	Psoriasis and related disorders	LY6E	8	143018261	chr8:143018261:G:A	G	A	A	132	13140	ADD	6636	2.76953	0.468682	1.10526	6.93984	2.17349	0.0297431	dermatologic
610.2	Fibroadenosis of breast	LY6E	8	143018261	chr8:143018261:G:A	G	A	A	6	14402	ADD	7204	5.08756	0.748502	1.17323	22.0615	2.17341	0.0297497	genitourinary
627.1	Postmenopausal bleeding	ACE2	X	15674316	chrX:15674316:A:C	C	A	A	440	12686	ADD	6563	1.25586	0.104859	1.02255	1.5424	2.17261	0.0298098	genitourinary
627.1	Postmenopausal bleeding	ACE2	X	15674699	chrX:15674699:T:C	C	T	T	440	12686	ADD	6563	1.25586	0.104859	1.02255	1.5424	2.17261	0.0298098	genitourinary
627.1	Postmenopausal bleeding	ACE2	X	15675338	chrX:15675338:T:A	A	T	T	440	12686	ADD	6563	1.25586	0.104859	1.02255	1.5424	2.17261	0.0298098	genitourinary
627.1	Postmenopausal bleeding	ACE2	X	15675244	chrX:15675244:A:G	G	A	A	440	12686	ADD	6563	1.25585	0.104858	1.02255	1.54239	2.17261	0.0298099	genitourinary
451	Phlebitis and thrombophlebitis	ACE2	X	15674766	chrX:15674766:C:G	C	G	G	150	11138	ADD	5644	0.750142	0.132446	0.578636	0.972483	-2.17064	0.0299584	circulatory system
728	Disorders of muscle, ligament, and fascia	ACE2	X	15675734	chrX:15675734:C:T	C	T	T	46	11508	ADD	5777	1.62411	0.22358	1.04786	2.51726	2.16908	0.0300766	musculoskeletal
454.11	Varicose veins of lower extremity, symptomtic	DPP4	2	162073199	chr2:162073199:T:G	T	G	G	220	11138	ADD	5679	0.676298	0.180354	0.47492	0.963065	-2.16863	0.0301105	circulatory system
621	Endometrial hyperplasia	TMPRSS2	21	41508700	chr21:41508700:G:A	G	A	A	88	16764	ADD	8426	2.77863	0.471312	1.10319	6.99861	2.16832	0.0301341	genitourinary
713.5	Arthropathy associated with neurological disorders	DPP4	2	162073199	chr2:162073199:T:G	T	G	G	26	14484	ADD	7255	2.01892	0.324073	1.06972	3.81041	2.16792	0.0301647	musculoskeletal
743.13	Other specified osteoporosis	DPP4	2	162073199	chr2:162073199:T:G	T	G	G	44	15886	ADD	7965	1.85066	0.283965	1.06075	3.22878	2.16767	0.0301839	musculoskeletal
505	Other pulmonary inflamation or edema	LY6E	8	143018261	chr8:143018261:G:A	G	A	A	42	14020	ADD	7031	4.07557	0.648397	1.14359	14.5246	2.1669	0.0302427	respiratory
771.2	Cramp of limb	DPP4	2	162073222	chr2:162073222:G:A	G	A	A	204	12886	ADD	6545	0.654773	0.195511	0.446346	0.960529	-2.16594	0.0303156	symptoms
202.2	Non-Hodgkins lymphoma	ACE2	X	15674766	chrX:15674766:C:G	C	G	G	148	17048	ADD	8598	1.35366	0.139965	1.02889	1.78093	2.16346	0.0305055	neoplasms
451.2	Phlebitis and thrombophlebitis of lower extremities	ACE2	X	15674766	chrX:15674766:C:G	C	G	G	110	11138	ADD	5624	0.710725	0.157895	0.521556	0.968505	-2.16264	0.0305686	circulatory system
561.2	Flatulence	TMPRSS2	21	41508700	chr21:41508700:G:A	G	A	A	300	17050	ADD	8675	1.96136	0.311532	1.06508	3.61189	2.16235	0.0305914	digestive
514.1	Abnormal results of function study of pulmonary system	ACE2	X	15674316	chrX:15674316:A:C	C	A	A	166	15268	ADD	7717	0.702887	0.16307	0.510599	0.967588	-2.16202	0.0306168	respiratory
514.1	Abnormal results of function study of pulmonary system	ACE2	X	15674699	chrX:15674699:T:C	C	T	T	166	15268	ADD	7717	0.702887	0.16307	0.510599	0.967588	-2.16202	0.0306168	respiratory
514.1	Abnormal results of function study of pulmonary system	ACE2	X	15675244	chrX:15675244:A:G	G	A	A	166	15268	ADD	7717	0.702887	0.16307	0.510599	0.967588	-2.16202	0.0306168	respiratory
514.1	Abnormal results of function study of pulmonary system	ACE2	X	15675338	chrX:15675338:T:A	A	T	T	166	15268	ADD	7717	0.702887	0.16307	0.510599	0.967588	-2.16202	0.0306168	respiratory
599	Other symptoms/disorders or the urinary system	DPP4	2	162073222	chr2:162073222:G:A	G	A	A	2716	10860	ADD	6788	0.887174	0.0553968	0.795893	0.988923	-2.16103	0.0306929	genitourinary
170.1	Bone cancer	TMPRSS2	21	41508700	chr21:41508700:G:A	G	A	A	32	17588	ADD	8810	3.79559	0.617323	1.13191	12.7276	2.16068	0.03072	neoplasms
304	Adjustment reaction	LY6E	8	143018292	chr8:143018292:C:A	C	A	A	474	7042	ADD	3758	1.33419	0.133667	1.02669	1.73379	2.15705	0.0310021	mental disorders
521.1	Dental caries	DPP4	2	162073469	chr2:162073469:A:G	A	G	G	270	15118	ADD	7694	0.713353	0.156597	0.524818	0.969617	-2.15699	0.0310062	digestive
327.41	Organic or persistent insomnia	DPP4	2	162073469	chr2:162073469:A:G	A	G	G	188	10772	ADD	5480	1.38909	0.15241	1.03038	1.87267	2.15635	0.0310565	neurological
364.5	Corneal dystrophy	LY6E	8	143018261	chr8:143018261:G:A	G	A	A	28	14542	ADD	7285	3.63928	0.599386	1.12413	11.7819	2.15518	0.0311475	sense organs
803.1	Fracture of humerus	DPP4	2	162073469	chr2:162073469:A:G	A	G	G	78	15624	ADD	7851	0.515565	0.307543	0.282165	0.942028	-2.15415	0.0312286	injuries & poisonings
1011	Complications of surgical and medical procedures	DPP4	2	162073469	chr2:162073469:A:G	A	G	G	364	16660	ADD	8512	0.752521	0.132075	0.580893	0.974857	-2.15277	0.0313368	NULL
575.9	Nonspecific abnormal findings on radiological and other examination of biliary tract	ACE2	X	15674766	chrX:15674766:C:G	C	G	G	36	16340	ADD	8188	1.86311	0.289137	1.05712	3.28362	2.15208	0.0313909	digestive
531.2	Gastric ulcer	DPP4	2	162073222	chr2:162073222:G:A	G	A	A	136	16886	ADD	8511	0.582988	0.250768	0.356619	0.953045	-2.15175	0.0314173	digestive
214	Lipoma	TMPRSS2	21	41508700	chr21:41508700:G:A	G	A	A	226	16712	ADD	8469	2.13305	0.352148	1.06968	4.25355	2.15124	0.0314574	neoplasms
473.3	Paralysis/spasm of vocal cords or larynx	LY6E	8	143018261	chr8:143018261:G:A	G	A	A	96	10330	ADD	5213	2.75385	0.470939	1.09415	6.93114	2.15102	0.0314745	respiratory
250.42	Other abnormal glucose	DPP4	2	162073222	chr2:162073222:G:A	G	A	A	2348	9124	ADD	5736	0.878655	0.0601441	0.780951	0.988583	-2.15087	0.0314861	endocrine/metabolic
371.3	Inflammation of eyelids	LY6E	8	143017718	chr8:143017718:G:C	C	G	G	440	14556	ADD	7498	1.29126	0.118887	1.02286	1.63009	2.15011	0.0315465	sense organs
213	Benign neoplasm of bone and articular cartilage	LY6E	8	143017718	chr8:143017718:G:C	C	G	G	34	7060	ADD	3547	2.11441	0.348461	1.06802	4.186	2.14881	0.0316496	neoplasms
300.8	Acute reaction to stress	ACE2	X	15675734	chrX:15675734:C:T	C	T	T	96	7042	ADD	3569	1.4977	0.187995	1.03611	2.16495	2.14864	0.0316633	mental disorders
711	Arthropathy associated with infections	DPP4	2	162074215	chr2:162074215:T:G	G	T	T	38	14484	ADD	7261	1.80519	0.27492	1.0532	3.09411	2.14851	0.0316735	musculoskeletal
272.9	Unspecified disorder of lipoid metabolism	ACE2	X	15674766	chrX:15674766:C:G	C	G	G	62	8752	ADD	4407	0.620099	0.222818	0.40068	0.959674	-2.1447	0.031977	endocrine/metabolic
433.12	Cerebral atherosclerosis	TMPRSS2	21	41508700	chr21:41508700:G:A	G	A	A	26	14764	ADD	7395	3.70112	0.610358	1.11891	12.2425	2.14405	0.0320292	circulatory system
509	Respiratory failure, insufficiency, arrest	DPP4	2	162073199	chr2:162073199:T:G	T	G	G	410	14020	ADD	7215	1.27671	0.113945	1.02118	1.59618	2.14388	0.0320425	respiratory
182	Malignant neoplasm of uterus	LY6E	8	143017718	chr8:143017718:G:C	C	G	G	168	13222	ADD	6695	1.46327	0.177651	1.03302	2.07273	2.14284	0.0321263	neoplasms
444	Arterial embolism and thrombosis	DPP4	2	162073222	chr2:162073222:G:A	G	A	A	126	14400	ADD	7263	1.52436	0.196745	1.03662	2.2416	2.14275	0.0321335	circulatory system
316	Substance addiction and disorders	DPP4	2	162074215	chr2:162074215:T:G	G	T	T	1280	10372	ADD	5826	1.14267	0.0622463	1.01143	1.29094	2.14256	0.0321484	mental disorders
599.5	Frequency of urination and polyuria	TMPRSS2	21	41508700	chr21:41508700:G:A	G	A	A	1750	10860	ADD	6305	1.45153	0.174005	1.03208	2.04145	2.14141	0.0322408	genitourinary
327.5	Parasomnia	LY6E	8	143018292	chr8:143018292:C:A	C	A	A	58	10772	ADD	5415	1.99549	0.322679	1.06019	3.75591	2.14111	0.0322653	neurological
568	Other disorders of peritoneum	TMPRSS2	21	41508701	chr21:41508701:T:G	G	T	T	62	14840	ADD	7451	2.34642	0.39885	1.07375	5.12752	2.13838	0.0324863	digestive
272.12	Hyperglyceridemia	TMPRSS2	21	41508700	chr21:41508700:G:A	G	A	A	234	8752	ADD	4493	2.0695	0.340237	1.06232	4.03158	2.13765	0.0325455	endocrine/metabolic
371.1	Uveitis, noninfectious or NOS	DPP4	2	162073469	chr2:162073469:A:G	A	G	G	262	14556	ADD	7409	1.33809	0.136275	1.02444	1.74776	2.13717	0.0325839	sense organs
117	Mycoses	DPP4	2	162073222	chr2:162073222:G:A	G	A	A	102	12868	ADD	6485	0.51722	0.308488	0.282546	0.946805	-2.13716	0.0325852	infectious diseases
874	Complication of amputation stump	LY6E	8	143018261	chr8:143018261:G:A	G	A	A	54	15452	ADD	7753	3.73048	0.61632	1.11468	12.4847	2.13612	0.0326692	injuries & poisonings
350.1	Abnormal involuntary movements	DPP4	2	162074215	chr2:162074215:T:G	G	T	T	486	14758	ADD	7622	1.22568	0.0952645	1.01692	1.47729	2.13611	0.0326706	neurological
911	Blister	TMPRSS2	21	41508700	chr21:41508700:G:A	G	A	A	20	17604	ADD	8812	4.98541	0.752185	1.14141	21.7752	2.1358	0.0326958	injuries & poisonings
284	Aplastic anemia	TMPRSS2	21	41508700	chr21:41508700:G:A	G	A	A	62	8724	ADD	4393	3.23848	0.550285	1.10138	9.52235	2.13545	0.0327244	hematopoietic
172.1	Melanomas of skin, dx or hx	ACE2	X	15675734	chrX:15675734:C:T	C	T	T	22	16746	ADD	8384	2.02841	0.331535	1.05914	3.88471	2.13326	0.0329031	neoplasms
521.1	Dental caries	DPP4	2	162073199	chr2:162073199:T:G	T	G	G	270	15118	ADD	7694	0.704681	0.164102	0.510869	0.972023	-2.13288	0.0329343	digestive
614.54	Abscess or ulceration of vulva	LY6E	8	143018261	chr8:143018261:G:A	G	A	A	46	14548	ADD	7297	3.83733	0.630706	1.11473	13.2095	2.13218	0.0329923	genitourinary
300.11	Generalized anxiety disorder	DPP4	2	162073199	chr2:162073199:T:G	T	G	G	606	7042	ADD	3824	0.793602	0.108467	0.641616	0.98159	-2.13127	0.0330669	mental disorders
724.8	Other symptoms referable to back	DPP4	2	162073469	chr2:162073469:A:G	A	G	G	152	13702	ADD	6927	1.44053	0.17141	1.02948	2.01571	2.12947	0.0332153	musculoskeletal
610.8	Other specified benign mammary dysplasias	TMPRSS2	21	41508701	chr21:41508701:T:G	G	T	T	46	14402	ADD	7224	2.52506	0.435023	1.07641	5.92331	2.12923	0.0332351	genitourinary
704.8	Other specified diseases of hair and hair follicles	TMPRSS2	21	41508700	chr21:41508700:G:A	G	A	A	132	15434	ADD	7783	2.4874	0.428276	1.07447	5.75829	2.12769	0.0333632	dermatologic
440.2	Atherosclerosis of the extremities	DPP4	2	162073222	chr2:162073222:G:A	G	A	A	286	14400	ADD	7343	1.31758	0.129648	1.02193	1.69877	2.12729	0.0333959	circulatory system
726.4	Calcaneal spur; Exostosis NOS	DPP4	2	162073199	chr2:162073199:T:G	T	G	G	70	11508	ADD	5789	0.473538	0.351459	0.237789	0.943013	-2.12691	0.0334273	musculoskeletal
509.8	Dependence on respirator [Ventilator] or supplemental oxygen	DPP4	2	162073199	chr2:162073199:T:G	T	G	G	452	14020	ADD	7236	1.26122	0.109161	1.0183	1.5621	2.12605	0.0334994	respiratory
691.1	Ichthyosis congenita	LY6E	8	143018261	chr8:143018261:G:A	G	A	A	14	13610	ADD	6812	4.9405	0.751901	1.13175	21.567	2.12457	0.0336225	dermatologic
255.12	Hyperaldosteronism	LY6E	8	143018292	chr8:143018292:C:A	C	A	A	110	14812	ADD	7461	0.402669	0.428392	0.1739	0.932387	-2.12338	0.0337219	endocrine/metabolic
425.11	Hypertrophic obstructive cardiomyopathy	LY6E	8	143017718	chr8:143017718:G:C	C	G	G	84	14744	ADD	7414	0.472634	0.353109	0.236569	0.94426	-2.12239	0.0338051	circulatory system
316.1	Polyneuropathy due to drugs	ACE2	X	15674316	chrX:15674316:A:C	C	A	A	66	10372	ADD	5219	1.56731	0.211747	1.03494	2.37353	2.12217	0.0338232	mental disorders
316.1	Polyneuropathy due to drugs	ACE2	X	15674699	chrX:15674699:T:C	C	T	T	66	10372	ADD	5219	1.56731	0.211747	1.03494	2.37353	2.12217	0.0338232	mental disorders
316.1	Polyneuropathy due to drugs	ACE2	X	15675244	chrX:15675244:A:G	G	A	A	66	10372	ADD	5219	1.56731	0.211747	1.03494	2.37353	2.12217	0.0338232	mental disorders
316.1	Polyneuropathy due to drugs	ACE2	X	15675338	chrX:15675338:T:A	A	T	T	66	10372	ADD	5219	1.56731	0.211747	1.03494	2.37353	2.12217	0.0338232	mental disorders
425.2	Secondary/extrinsic cardiomyopathies	DPP4	2	162074215	chr2:162074215:T:G	G	T	T	538	14744	ADD	7641	0.813623	0.0972849	0.672379	0.984538	-2.12014	0.033994	circulatory system
459.1	Hemorrhage NOS	ACE2	X	15675244	chrX:15675244:A:G	G	A	A	36	12600	ADD	6318	1.76718	0.268654	1.04376	2.99199	2.1194	0.0340563	circulatory system
199	Neoplasm of uncertain behavior	LY6E	8	143017718	chr8:143017718:G:C	C	G	G	484	15350	ADD	7917	0.761743	0.128427	0.592231	0.979774	-2.11907	0.0340846	neoplasms
705.8	Hyperhidrosis	TMPRSS2	21	41508700	chr21:41508700:G:A	G	A	A	312	14256	ADD	7284	1.97686	0.32169	1.05233	3.71363	2.11852	0.0341307	dermatologic
079	Viral infection	LY6E	8	143018292	chr8:143018292:C:A	C	A	A	636	12338	ADD	6487	1.28694	0.119079	1.01905	1.62524	2.11847	0.0341356	infectious diseases
783	Fever of unknown origin	LY6E	8	143017718	chr8:143017718:G:C	C	G	G	944	14828	ADD	7886	1.19249	0.0831298	1.0132	1.40351	2.11768	0.0342023	symptoms
459.1	Hemorrhage NOS	ACE2	X	15674316	chrX:15674316:A:C	C	A	A	36	12600	ADD	6318	1.76639	0.268678	1.04325	2.99078	2.11754	0.0342138	circulatory system
459.1	Hemorrhage NOS	ACE2	X	15674699	chrX:15674699:T:C	C	T	T	36	12600	ADD	6318	1.76639	0.268678	1.04325	2.99078	2.11754	0.0342138	circulatory system
459.1	Hemorrhage NOS	ACE2	X	15675338	chrX:15675338:T:A	A	T	T	36	12600	ADD	6318	1.76639	0.268678	1.04325	2.99078	2.11754	0.0342138	circulatory system
994.2	Sepsis	LY6E	8	143018292	chr8:143018292:C:A	C	A	A	814	15854	ADD	8334	1.25193	0.106122	1.01683	1.54139	2.11726	0.0342375	injuries & poisonings
255	Disorders of adrenal glands	TMPRSS2	21	41508701	chr21:41508701:T:G	G	T	T	204	14812	ADD	7508	1.72203	0.256987	1.04063	2.84963	2.11492	0.0344366	endocrine/metabolic
367.9	Blindness and low vision	ACE2	X	15674766	chrX:15674766:C:G	C	G	G	238	14070	ADD	7154	0.794713	0.108665	0.642266	0.983346	-2.11452	0.0344712	sense organs
737.3	Kyphoscoliosis and scoliosis	LY6E	8	143017718	chr8:143017718:G:C	C	G	G	90	15480	ADD	7785	1.65474	0.238418	1.03702	2.64041	2.11244	0.0346488	musculoskeletal
728	Disorders of muscle, ligament, and fascia	ACE2	X	15674766	chrX:15674766:C:G	C	G	G	46	11508	ADD	5777	1.60408	0.223728	1.03464	2.48692	2.11216	0.0346731	musculoskeletal
415.11	Pulmonary embolism and infarction, acute	TMPRSS2	21	41508701	chr21:41508701:T:G	G	T	T	606	14402	ADD	7504	0.605616	0.237463	0.380249	0.964553	-2.11195	0.0346909	circulatory system
471	Nasal polyps	DPP4	2	162073469	chr2:162073469:A:G	A	G	G	98	10330	ADD	5214	1.55582	0.209422	1.03205	2.34542	2.1106	0.034807	respiratory
696.4	Psoriasis	DPP4	2	162073199	chr2:162073199:T:G	T	G	G	116	13140	ADD	6628	1.50978	0.195368	1.02947	2.21416	2.10865	0.0349748	dermatologic
594.8	Renal colic	LY6E	8	143018261	chr8:143018261:G:A	G	A	A	20	16644	ADD	8332	4.77293	0.741268	1.11639	20.4058	2.1085	0.034988	genitourinary
726.3	Bursitis	TMPRSS2	21	41508700	chr21:41508700:G:A	G	A	A	210	11508	ADD	5859	2.09396	0.350727	1.053	4.16396	2.10721	0.035099	musculoskeletal
249	Secondary diabetes mellitus	ACE2	X	15674766	chrX:15674766:C:G	C	G	G	842	9124	ADD	4983	1.13699	0.0609563	1.00895	1.28128	2.10617	0.0351896	endocrine/metabolic
348	Other conditions of brain	LY6E	8	143017718	chr8:143017718:G:C	C	G	G	158	14406	ADD	7282	1.47256	0.183796	1.02713	2.11115	2.10561	0.0352386	neurological
712	Infective connective tissue disorders	DPP4	2	162073469	chr2:162073469:A:G	A	G	G	22	14484	ADD	7253	2.0821	0.348376	1.05187	4.12136	2.10513	0.03528	musculoskeletal
803	Fracture of upper limb	LY6E	8	143018292	chr8:143018292:C:A	C	A	A	136	15624	ADD	7880	0.460902	0.367946	0.224085	0.947993	-2.10512	0.0352811	injuries & poisonings
642	Hypertension complicating pregnancy, childbirth, and the puerperium	TMPRSS2	21	41508701	chr21:41508701:T:G	G	T	T	592	16758	ADD	8675	0.577105	0.261157	0.345906	0.962835	-2.10499	0.0352926	pregnancy complications
242.1	Graves' disease	LY6E	8	143017718	chr8:143017718:G:C	C	G	G	252	14014	ADD	7133	1.37305	0.150682	1.02194	1.84479	2.10399	0.0353797	endocrine/metabolic
949	Allergies, other	ACE2	X	15674766	chrX:15674766:C:G	C	G	G	724	12656	ADD	6690	1.1579	0.0696844	1.01008	1.32736	2.10392	0.0353855	injuries & poisonings
705.1	Dyshidrosis	ACE2	X	15674766	chrX:15674766:C:G	C	G	G	38	14256	ADD	7147	1.90162	0.305495	1.04493	3.46068	2.10382	0.0353942	dermatologic
081	Infection/inflammation of internal prosthetic device; implant; and graft	TMPRSS2	21	41508701	chr21:41508701:T:G	G	T	T	184	16568	ADD	8376	1.77376	0.27259	1.0396	3.02639	2.10244	0.0355151	infectious diseases
270	Disorders of protein plasma/amino-acid transport and metabolism	LY6E	8	143018292	chr8:143018292:C:A	C	A	A	156	15522	ADD	7839	1.56162	0.212021	1.03063	2.36618	2.10226	0.0355303	endocrine/metabolic
654.2	Rhesus isoimmunization in pregnancy	TMPRSS2	21	41508700	chr21:41508700:G:A	G	A	A	110	16468	ADD	8289	2.1427	0.362571	1.05279	4.36097	2.10185	0.0355665	pregnancy complications
525	Other diseases of the teeth and supporting structures	ACE2	X	15674316	chrX:15674316:A:C	C	A	A	320	15118	ADD	7719	0.784224	0.115674	0.625142	0.983789	-2.10126	0.0356183	digestive
525	Other diseases of the teeth and supporting structures	ACE2	X	15674699	chrX:15674699:T:C	C	T	T	320	15118	ADD	7719	0.784224	0.115674	0.625142	0.983789	-2.10126	0.0356183	digestive
525	Other diseases of the teeth and supporting structures	ACE2	X	15675338	chrX:15675338:T:A	A	T	T	320	15118	ADD	7719	0.784224	0.115674	0.625142	0.983789	-2.10126	0.0356183	digestive
318	Tobacco use disorder	LY6E	8	143018292	chr8:143018292:C:A	C	A	A	4752	10372	ADD	7562	1.12482	0.0559913	1.00791	1.25529	2.10072	0.0356653	mental disorders
170.2	Cancer of connective tissue	DPP4	2	162073469	chr2:162073469:A:G	A	G	G	76	17588	ADD	8832	0.525432	0.30634	0.288244	0.957797	-2.10072	0.0356654	neoplasms
772.4	Rhabdomyolysis	LY6E	8	143018292	chr8:143018292:C:A	C	A	A	34	14980	ADD	7507	2.11044	0.355619	1.05116	4.23717	2.10026	0.0357056	symptoms
379	Other disorders of eye	LY6E	8	143017718	chr8:143017718:G:C	C	G	G	398	14222	ADD	7310	1.29961	0.124849	1.01752	1.65991	2.09907	0.0358111	sense organs
560.1	Paralytic ileus	ACE2	X	15675734	chrX:15675734:C:T	C	T	T	80	12050	ADD	6065	1.4486	0.176621	1.02472	2.0478	2.09824	0.0358836	digestive
525	Other diseases of the teeth and supporting structures	ACE2	X	15675244	chrX:15675244:A:G	G	A	A	320	15118	ADD	7719	0.784519	0.115681	0.625368	0.984172	-2.09788	0.0359156	digestive
263	Other nutritional deficiency	DPP4	2	162074215	chr2:162074215:T:G	G	T	T	146	11776	ADD	5961	1.41163	0.164418	1.02275	1.94838	2.09677	0.0360137	endocrine/metabolic
465	Acute upper respiratory infections of multiple or unspecified sites	LY6E	8	143017718	chr8:143017718:G:C	C	G	G	2730	11522	ADD	7126	1.12283	0.0552557	1.00758	1.25126	2.09661	0.036028	respiratory
345.1	Epilepsy	ACE2	X	15675244	chrX:15675244:A:G	G	A	A	244	14406	ADD	7325	1.2616	0.110919	1.0151	1.56796	2.09506	0.0361656	neurological
560.1	Paralytic ileus	TMPRSS2	21	41508701	chr21:41508701:T:G	G	T	T	80	12050	ADD	6065	2.04816	0.342354	1.04701	4.00661	2.09416	0.0362458	digestive
284.1	Pancytopenia	DPP4	2	162074215	chr2:162074215:T:G	G	T	T	154	8724	ADD	4439	1.40786	0.163386	1.02208	1.93925	2.09364	0.0362921	hematopoietic
788	Syncope and collapse	DPP4	2	162073469	chr2:162073469:A:G	A	G	G	1060	15266	ADD	8163	0.85187	0.0765874	0.733132	0.989839	-2.09331	0.0363213	symptoms
454.11	Varicose veins of lower extremity, symptomtic	DPP4	2	162073469	chr2:162073469:A:G	A	G	G	220	11138	ADD	5679	0.69765	0.172015	0.497988	0.977365	-2.09306	0.0363434	circulatory system
800.2	Fracture of unspecified part of femur	DPP4	2	162073469	chr2:162073469:A:G	A	G	G	46	15624	ADD	7835	1.72004	0.259275	1.03477	2.85913	2.09178	0.0364583	injuries & poisonings
345.1	Epilepsy	ACE2	X	15674316	chrX:15674316:A:C	C	A	A	244	14406	ADD	7325	1.26094	0.110917	1.01457	1.56713	2.09034	0.0365869	neurological
345.1	Epilepsy	ACE2	X	15674699	chrX:15674699:T:C	C	T	T	244	14406	ADD	7325	1.26094	0.110917	1.01457	1.56713	2.09034	0.0365869	neurological
345.1	Epilepsy	ACE2	X	15675338	chrX:15675338:T:A	A	T	T	244	14406	ADD	7325	1.26094	0.110917	1.01457	1.56713	2.09034	0.0365869	neurological
535	Gastritis and duodenitis	LY6E	8	143018261	chr8:143018261:G:A	G	A	A	426	14340	ADD	7383	1.93838	0.316646	1.0421	3.60552	2.09019	0.0366004	digestive
540.11	Acute appendicitis	LY6E	8	143017718	chr8:143017718:G:C	C	G	G	40	17610	ADD	8825	1.97888	0.326578	1.04337	3.75322	2.08995	0.0366222	digestive
756	Other congenital musculoskeletal anomalies	DPP4	2	162073222	chr2:162073222:G:A	G	A	A	20	17192	ADD	8606	2.19914	0.377105	1.05017	4.60516	2.08978	0.0366379	congenital anomalies
526.1	Cysts of the jaws	TMPRSS2	21	41508701	chr21:41508701:T:G	G	T	T	10	15118	ADD	7564	3.47869	0.596627	1.08035	11.2012	2.08951	0.0366622	digestive
705.1	Dyshidrosis	ACE2	X	15674316	chrX:15674316:A:C	C	A	A	38	14256	ADD	7147	0.424456	0.410142	0.189985	0.948302	-2.08939	0.0366729	dermatologic
705.1	Dyshidrosis	ACE2	X	15674699	chrX:15674699:T:C	C	T	T	38	14256	ADD	7147	0.424456	0.410142	0.189985	0.948302	-2.08939	0.0366729	dermatologic
705.1	Dyshidrosis	ACE2	X	15675244	chrX:15675244:A:G	G	A	A	38	14256	ADD	7147	0.424456	0.410142	0.189985	0.948302	-2.08939	0.0366729	dermatologic
705.1	Dyshidrosis	ACE2	X	15675338	chrX:15675338:T:A	A	T	T	38	14256	ADD	7147	0.424456	0.410142	0.189985	0.948302	-2.08939	0.0366729	dermatologic
386	Vertiginous syndromes and other disorders of vestibular system	ACE2	X	15674766	chrX:15674766:C:G	C	G	G	100	12818	ADD	6459	1.47059	0.184688	1.02397	2.11202	2.08819	0.0367803	sense organs
619.2	Disorders of uterus, NEC	ACE2	X	15675734	chrX:15675734:C:T	C	T	T	62	14484	ADD	7273	0.594992	0.24868	0.365456	0.968697	-2.08785	0.036811	genitourinary
429.3	Symptoms involving cardiovascular system	LY6E	8	143018292	chr8:143018292:C:A	C	A	A	322	12776	ADD	6549	0.642579	0.21184	0.424237	0.973296	-2.08773	0.0368219	circulatory system
366	Cataract	DPP4	2	162074215	chr2:162074215:T:G	G	T	T	1988	13816	ADD	7902	0.887259	0.0572972	0.793011	0.992709	-2.08767	0.0368273	sense organs
686.5	Pyoderma	DPP4	2	162074215	chr2:162074215:T:G	G	T	T	12	13750	ADD	6881	2.06841	0.348171	1.04538	4.09262	2.08743	0.0368496	dermatologic
601.3	Orchitis and epididymitis	DPP4	2	162073469	chr2:162073469:A:G	A	G	G	84	15234	ADD	7659	1.60205	0.225815	1.02911	2.49396	2.08702	0.0368859	genitourinary
286.13	Congenital factor VIII disorder	DPP4	2	162073222	chr2:162073222:G:A	G	A	A	6	13656	ADD	6831	2.38451	0.416463	1.05416	5.39377	2.0866	0.0369241	hematopoietic
722.6	Degeneration of intervertebral disc	LY6E	8	143017718	chr8:143017718:G:C	C	G	G	1104	13702	ADD	7403	1.17967	0.0792773	1.0099	1.37797	2.08422	0.0371406	musculoskeletal
345.11	Generalized convulsive epilepsy	TMPRSS2	21	41508700	chr21:41508700:G:A	G	A	A	82	14406	ADD	7244	2.73241	0.482318	1.06169	7.03228	2.08407	0.0371537	neurological
276.14	Hypopotassemia	ACE2	X	15674316	chrX:15674316:A:C	C	A	A	1408	11046	ADD	6227	0.888779	0.0565804	0.795486	0.993013	-2.08388	0.0371713	endocrine/metabolic
276.14	Hypopotassemia	ACE2	X	15674699	chrX:15674699:T:C	C	T	T	1408	11046	ADD	6227	0.888779	0.0565804	0.795486	0.993013	-2.08388	0.0371713	endocrine/metabolic
276.14	Hypopotassemia	ACE2	X	15675338	chrX:15675338:T:A	A	T	T	1408	11046	ADD	6227	0.888779	0.0565804	0.795486	0.993013	-2.08388	0.0371713	endocrine/metabolic
279	Disorders involving the immune mechanism	DPP4	2	162074215	chr2:162074215:T:G	G	T	T	770	15946	ADD	8358	1.17229	0.0763042	1.00945	1.3614	2.08323	0.0372299	endocrine/metabolic
172.1	Melanomas of skin, dx or hx	ACE2	X	15674766	chrX:15674766:C:G	C	G	G	22	16746	ADD	8384	1.98679	0.329627	1.04129	3.7908	2.08272	0.037277	neoplasms
370.2	Superficial keratitis	LY6E	8	143018292	chr8:143018292:C:A	C	A	A	14	14556	ADD	7285	2.6592	0.469741	1.05902	6.67722	2.08205	0.0373379	sense organs
302.1	Decreased libido	DPP4	2	162073469	chr2:162073469:A:G	A	G	G	62	7042	ADD	3552	1.70672	0.257135	1.03107	2.82511	2.07895	0.0376216	mental disorders
278.4	Abnormal weight gain	DPP4	2	162074215	chr2:162074215:T:G	G	T	T	502	8180	ADD	4341	1.22191	0.096458	1.01143	1.4762	2.07776	0.0377319	endocrine/metabolic
535.8	Other specified gastritis	LY6E	8	143018261	chr8:143018261:G:A	G	A	A	84	14340	ADD	7212	3.02043	0.532223	1.06424	8.5723	2.07694	0.0378067	digestive
303.4	Somatoform disorder	LY6E	8	143017718	chr8:143017718:G:C	C	G	G	68	7042	ADD	3555	1.74029	0.266787	1.03165	2.93569	2.07675	0.0378245	mental disorders
362.3	Other nondiabetic retinopathy	TMPRSS2	21	41508701	chr21:41508701:T:G	G	T	T	150	13982	ADD	7066	1.83648	0.292735	1.03469	3.25959	2.07645	0.0378521	sense organs
288	Diseases of white blood cells	LY6E	8	143018261	chr8:143018261:G:A	G	A	A	252	13698	ADD	6975	2.16024	0.371542	1.0429	4.47464	2.07303	0.0381695	hematopoietic
260.22	Nutritional marasmus	LY6E	8	143018261	chr8:143018261:G:A	G	A	A	4	11776	ADD	5890	4.66452	0.74327	1.08676	20.0207	2.0719	0.0382744	endocrine/metabolic
701.3	Circumscribed scleroderma	LY6E	8	143017718	chr8:143017718:G:C	C	G	G	34	15778	ADD	7906	2.04693	0.345775	1.03939	4.03114	2.0717	0.0382931	dermatologic
170.2	Cancer of connective tissue	DPP4	2	162073222	chr2:162073222:G:A	G	A	A	76	17588	ADD	8832	0.487275	0.347179	0.246749	0.962262	-2.07077	0.0383806	neoplasms
215	Other benign neoplasm of connective and other soft tissue	TMPRSS2	21	41508700	chr21:41508700:G:A	G	A	A	156	16712	ADD	8434	2.26162	0.394153	1.04452	4.89693	2.07047	0.0384081	neoplasms
964	Poisoning by agents primarily affecting blood constituents	LY6E	8	143017718	chr8:143017718:G:C	C	G	G	36	12966	ADD	6501	2.01966	0.339586	1.03806	3.92948	2.06997	0.0384553	injuries & poisonings
535.8	Other specified gastritis	DPP4	2	162073469	chr2:162073469:A:G	A	G	G	84	14340	ADD	7212	1.57862	0.220561	1.02455	2.43231	2.06995	0.0384574	digestive
276.14	Hypopotassemia	ACE2	X	15675244	chrX:15675244:A:G	G	A	A	1408	11046	ADD	6227	0.88947	0.0565869	0.796094	0.993798	-2.06991	0.0384609	endocrine/metabolic
686	Other local infections of skin and subcutaneous tissue	LY6E	8	143017718	chr8:143017718:G:C	C	G	G	138	13750	ADD	6944	0.583794	0.260021	0.350695	0.97183	-2.06986	0.0384656	dermatologic
601	Inflammatory diseases of prostate	TMPRSS2	21	41508700	chr21:41508700:G:A	G	A	A	148	15234	ADD	7691	2.83764	0.504092	1.05651	7.62151	2.06901	0.038545	genitourinary
112.3	Candidiasis of skin and nails	TMPRSS2	21	41508700	chr21:41508700:G:A	G	A	A	148	12868	ADD	6508	2.29793	0.402305	1.04446	5.05567	2.0681	0.0386307	infectious diseases
295	Schizophrenia and other psychotic disorders	LY6E	8	143018261	chr8:143018261:G:A	G	A	A	262	7042	ADD	3652	2.15269	0.370977	1.04041	4.45409	2.06676	0.038757	mental disorders
556.11	Angiodysplasia of intestine (without mention of hemorrhage)	LY6E	8	143018261	chr8:143018261:G:A	G	A	A	44	12050	ADD	6047	3.50478	0.607225	1.06608	11.5221	2.06534	0.0388906	digestive
289.3	Personal history of diseases of blood and blood-forming organs	LY6E	8	143018292	chr8:143018292:C:A	C	A	A	72	13698	ADD	6885	1.8346	0.293881	1.03131	3.26356	2.06486	0.038936	hematopoietic
292.11	Aphasia	DPP4	2	162073199	chr2:162073199:T:G	T	G	G	72	14340	ADD	7206	1.6479	0.241973	1.02556	2.64787	2.06428	0.0389911	mental disorders
452.2	Deep vein thrombosis [DVT]	LY6E	8	143018292	chr8:143018292:C:A	C	A	A	868	11138	ADD	6003	1.24249	0.105192	1.01101	1.52698	2.06403	0.0390153	circulatory system
276.1	Electrolyte imbalance	TMPRSS2	21	41508701	chr21:41508701:T:G	G	T	T	1886	11046	ADD	6466	0.768108	0.128044	0.597628	0.987218	-2.06043	0.0393574	endocrine/metabolic
556.11	Angiodysplasia of intestine (without mention of hemorrhage)	DPP4	2	162074215	chr2:162074215:T:G	G	T	T	44	12050	ADD	6047	1.70152	0.258071	1.02605	2.82168	2.0596	0.0394372	digestive
008.6	Viral Enteritis	LY6E	8	143018261	chr8:143018261:G:A	G	A	A	104	16266	ADD	8185	2.49696	0.444325	1.04521	5.96516	2.05947	0.0394488	infectious diseases
480.1	Bacterial pneumonia	LY6E	8	143017718	chr8:143017718:G:C	C	G	G	140	13578	ADD	6859	0.592714	0.254025	0.360262	0.975151	-2.05902	0.0394923	respiratory
110.2	Dermatomycoses	TMPRSS2	21	41508700	chr21:41508700:G:A	G	A	A	102	12868	ADD	6485	2.66069	0.475457	1.04782	6.75624	2.0582	0.0395708	infectious diseases
646	Other complications of pregnancy NEC	ACE2	X	15674316	chrX:15674316:A:C	C	A	A	872	16424	ADD	8648	1.19927	0.0883164	1.00865	1.42591	2.0575	0.039638	pregnancy complications
646	Other complications of pregnancy NEC	ACE2	X	15674699	chrX:15674699:T:C	C	T	T	872	16424	ADD	8648	1.19927	0.0883164	1.00865	1.42591	2.0575	0.039638	pregnancy complications
646	Other complications of pregnancy NEC	ACE2	X	15675338	chrX:15675338:T:A	A	T	T	872	16424	ADD	8648	1.19927	0.0883164	1.00865	1.42591	2.0575	0.039638	pregnancy complications
646	Other complications of pregnancy NEC	ACE2	X	15675244	chrX:15675244:A:G	G	A	A	872	16424	ADD	8648	1.19927	0.0883172	1.00865	1.42591	2.05747	0.0396409	pregnancy complications
737.1	Kyphosis (acquired)	DPP4	2	162073199	chr2:162073199:T:G	T	G	G	20	15480	ADD	7750	0.125235	1.00994	0.0173008	0.906541	-2.05712	0.0396749	musculoskeletal
189.4	Malignant neoplasm of other urinary organs	DPP4	2	162074215	chr2:162074215:T:G	G	T	T	32	17146	ADD	8589	1.80846	0.28805	1.0283	3.18051	2.05684	0.0397013	neoplasms
624	Symptoms involving female genital tract	LY6E	8	143017718	chr8:143017718:G:C	C	G	G	386	14668	ADD	7527	1.29968	0.127446	1.0124	1.66847	2.05669	0.0397156	genitourinary
701.5	Abnormal granulation tissue	DPP4	2	162073469	chr2:162073469:A:G	A	G	G	16	15778	ADD	7897	2.37168	0.419983	1.04128	5.40189	2.05627	0.0397565	dermatologic
751.3	Obstructive genitourinary defect	TMPRSS2	21	41508700	chr21:41508700:G:A	G	A	A	10	17056	ADD	8533	4.5118	0.732798	1.07298	18.9718	2.05609	0.0397741	congenital anomalies
270.32	Paraproteinemia	DPP4	2	162073222	chr2:162073222:G:A	G	A	A	206	15522	ADD	7864	1.3876	0.159326	1.01542	1.8962	2.05601	0.0397813	endocrine/metabolic
285	Other anemias	LY6E	8	143018292	chr8:143018292:C:A	C	A	A	4794	8724	ADD	6759	1.12511	0.0573432	1.00551	1.25894	2.05575	0.0398067	hematopoietic
840.2	Rotator cuff (capsule) sprain	ACE2	X	15674766	chrX:15674766:C:G	C	G	G	146	13340	ADD	6743	0.745261	0.143066	0.563029	0.986477	-2.05513	0.039866	injuries & poisonings
530	Diseases of esophagus	DPP4	2	162073199	chr2:162073199:T:G	T	G	G	3752	9678	ADD	6715	0.904869	0.0486551	0.822566	0.995408	-2.05456	0.0399218	digestive
797.1	Cardiogenic shock	DPP4	2	162073469	chr2:162073469:A:G	A	G	G	154	17032	ADD	8593	1.42468	0.172321	1.01633	1.99708	2.05399	0.0399771	symptoms
580.3	Nephritis and nephropathy without mention of glomerulonephritis	LY6E	8	143018261	chr8:143018261:G:A	G	A	A	172	10540	ADD	5356	2.40081	0.426419	1.04085	5.53767	2.05387	0.0399887	genitourinary
743.13	Other specified osteoporosis	DPP4	2	162073469	chr2:162073469:A:G	A	G	G	44	15886	ADD	7965	1.76677	0.277213	1.02616	3.04189	2.05311	0.0400616	musculoskeletal
292.11	Aphasia	DPP4	2	162073222	chr2:162073222:G:A	G	A	A	72	14340	ADD	7206	1.66204	0.247479	1.02326	2.69958	2.05288	0.040084	mental disorders
384	Other disorders of tympanic membrane	DPP4	2	162073222	chr2:162073222:G:A	G	A	A	14	15516	ADD	7765	2.36559	0.419935	1.0387	5.38753	2.05038	0.040327	sense organs
338.1	NA	LY6E	8	143018292	chr8:143018292:C:A	C	A	A	388	13512	ADD	6950	1.3555	0.148473	1.01326	1.81334	2.04866	0.0404958	NA
282.9	Other hereditary hemolytic anemias	DPP4	2	162073469	chr2:162073469:A:G	A	G	G	86	8724	ADD	4405	1.59511	0.228001	1.02027	2.49382	2.04798	0.0405622	hematopoietic
797.1	Cardiogenic shock	DPP4	2	162073222	chr2:162073222:G:A	G	A	A	154	17032	ADD	8593	1.44749	0.180605	1.01598	2.06228	2.04774	0.0405851	symptoms
194	Cancer of other endocrine glands	LY6E	8	143018261	chr8:143018261:G:A	G	A	A	8	17026	ADD	8517	4.67159	0.753101	1.06764	20.4412	2.04687	0.040671	neoplasms
426.91	Cardiac pacemaker in situ	ACE2	X	15675734	chrX:15675734:C:T	C	T	T	432	8980	ADD	4706	1.18868	0.0844564	1.00734	1.40267	2.04658	0.0406997	circulatory system
429	Ill-defined descriptions and complications of heart disease	LY6E	8	143018292	chr8:143018292:C:A	C	A	A	334	12776	ADD	6555	0.683879	0.185755	0.475187	0.984224	-2.04557	0.0407988	circulatory system
386.21	Central origin vertigo	TMPRSS2	21	41508700	chr21:41508700:G:A	G	A	A	10	12818	ADD	6414	4.66154	0.752537	1.06652	20.3746	2.04554	0.0408016	sense organs
722.8	Postlaminectomy syndrome	LY6E	8	143018261	chr8:143018261:G:A	G	A	A	48	13702	ADD	6875	3.46974	0.608247	1.05331	11.4298	2.04535	0.0408204	musculoskeletal
253.4	Anterior pituitary disorders	TMPRSS2	21	41508700	chr21:41508700:G:A	G	A	A	16	14812	ADD	7414	4.85121	0.77219	1.06797	22.0363	2.04513	0.040842	endocrine/metabolic
281.11	Pernicious anemia	DPP4	2	162073222	chr2:162073222:G:A	G	A	A	52	8724	ADD	4388	1.77225	0.279896	1.02395	3.06742	2.04451	0.0409036	hematopoietic
386	Vertiginous syndromes and other disorders of vestibular system	ACE2	X	15675734	chrX:15675734:C:T	C	T	T	100	12818	ADD	6459	1.45533	0.183561	1.01558	2.08549	2.04417	0.0409369	sense organs
614.32	Chronic inflammatory pelvic disease	LY6E	8	143017718	chr8:143017718:G:C	C	G	G	38	14548	ADD	7293	1.92179	0.319598	1.02722	3.59541	2.04399	0.0409544	genitourinary
528.3	Cellulitis and abscess of oral soft tissues	LY6E	8	143018261	chr8:143018261:G:A	G	A	A	12	16206	ADD	8109	4.56931	0.743338	1.06444	19.6146	2.04397	0.0409563	digestive
706.2	Sebaceous cyst	ACE2	X	15675734	chrX:15675734:C:T	C	T	T	412	14256	ADD	7334	1.1949	0.0871358	1.00731	1.41743	2.0435	0.0410029	dermatologic
696.41	Psoriasis vulgaris	LY6E	8	143018261	chr8:143018261:G:A	G	A	A	144	13140	ADD	6642	2.58772	0.465408	1.03935	6.44278	2.04289	0.0410636	dermatologic
241	Nontoxic nodular goiter	TMPRSS2	21	41508701	chr21:41508701:T:G	G	T	T	846	14014	ADD	7430	1.3575	0.149641	1.01243	1.82018	2.04251	0.0411008	endocrine/metabolic
401.1	Essential hypertension	DPP4	2	162073222	chr2:162073222:G:A	G	A	A	10554	5666	ADD	8110	0.904591	0.0490957	0.821603	0.995962	-2.04238	0.041114	circulatory system
495.11	Chronic obstructive asthma with exacerbation	ACE2	X	15674316	chrX:15674316:A:C	C	A	A	86	11930	ADD	6008	0.604926	0.24634	0.373266	0.980364	-2.04047	0.0413035	respiratory
495.11	Chronic obstructive asthma with exacerbation	ACE2	X	15674699	chrX:15674699:T:C	C	T	T	86	11930	ADD	6008	0.604926	0.24634	0.373266	0.980364	-2.04047	0.0413035	respiratory
495.11	Chronic obstructive asthma with exacerbation	ACE2	X	15675338	chrX:15675338:T:A	A	T	T	86	11930	ADD	6008	0.604926	0.24634	0.373266	0.980364	-2.04047	0.0413035	respiratory
722.8	Postlaminectomy syndrome	TMPRSS2	21	41508701	chr21:41508701:T:G	G	T	T	48	13702	ADD	6875	2.39337	0.427711	1.035	5.53449	2.0404	0.0413108	musculoskeletal
512.9	Other dypnea	TMPRSS2	21	41508700	chr21:41508700:G:A	G	A	A	2946	7326	ADD	5136	1.3652	0.15259	1.01231	1.84112	2.04014	0.0413364	respiratory
804	Fracture of hand or wrist	LY6E	8	143017718	chr8:143017718:G:C	C	G	G	216	15624	ADD	7920	1.39099	0.161805	1.01297	1.91008	2.03958	0.0413919	injuries & poisonings
170	Cancer of bone and connective tissue	ACE2	X	15674316	chrX:15674316:A:C	C	A	A	52	17588	ADD	8820	0.512443	0.327815	0.269531	0.974275	-2.03946	0.0414037	neoplasms
170	Cancer of bone and connective tissue	ACE2	X	15674699	chrX:15674699:T:C	C	T	T	52	17588	ADD	8820	0.512443	0.327815	0.269531	0.974275	-2.03946	0.0414037	neoplasms
170	Cancer of bone and connective tissue	ACE2	X	15675338	chrX:15675338:T:A	A	T	T	52	17588	ADD	8820	0.512443	0.327815	0.269531	0.974275	-2.03946	0.0414037	neoplasms
361.2	Retinoschisis and retinal cysts	TMPRSS2	21	41508700	chr21:41508700:G:A	G	A	A	4	14542	ADD	7273	4.4998	0.737499	1.06031	19.0965	2.03937	0.0414133	sense organs
170	Cancer of bone and connective tissue	ACE2	X	15675244	chrX:15675244:A:G	G	A	A	52	17588	ADD	8820	0.512443	0.327884	0.269495	0.974408	-2.03903	0.0414467	neoplasms
577.3	Cyst and pseudocyst of pancreas	LY6E	8	143017718	chr8:143017718:G:C	C	G	G	126	17022	ADD	8574	0.568666	0.276853	0.330521	0.978396	-2.03885	0.0414647	digestive
495.11	Chronic obstructive asthma with exacerbation	ACE2	X	15675244	chrX:15675244:A:G	G	A	A	86	11930	ADD	6008	0.60515	0.246367	0.373383	0.980777	-2.03875	0.0414752	respiratory
333.1	Essential tremor	LY6E	8	143018292	chr8:143018292:C:A	C	A	A	60	14406	ADD	7233	1.81953	0.293648	1.0233	3.23528	2.03841	0.0415085	neurological
560.1	Paralytic ileus	ACE2	X	15674316	chrX:15674316:A:C	C	A	A	80	12050	ADD	6065	0.630131	0.226597	0.404158	0.982451	-2.0381	0.0415401	digestive
560.1	Paralytic ileus	ACE2	X	15674699	chrX:15674699:T:C	C	T	T	80	12050	ADD	6065	0.630131	0.226597	0.404158	0.982451	-2.0381	0.0415401	digestive
560.1	Paralytic ileus	ACE2	X	15675338	chrX:15675338:T:A	A	T	T	80	12050	ADD	6065	0.630131	0.226597	0.404158	0.982451	-2.0381	0.0415401	digestive
212	Benign neoplasm of respiratory and intrathoracic organs	LY6E	8	143018292	chr8:143018292:C:A	C	A	A	62	17630	ADD	8846	1.86434	0.305717	1.02399	3.3943	2.03752	0.041598	neoplasms
323.2	Acute (transverse) myelitis	DPP4	2	162073222	chr2:162073222:G:A	G	A	A	6	17284	ADD	8645	2.56519	0.462404	1.03638	6.34921	2.03725	0.0416247	neurological
530.1	Esophagitis, GERD and related diseases	DPP4	2	162073199	chr2:162073199:T:G	T	G	G	3682	9678	ADD	6680	0.905131	0.0489475	0.822332	0.996266	-2.03639	0.0417115	digestive
218	Benign neoplasm of uterus	ACE2	X	15675734	chrX:15675734:C:T	C	T	T	750	15076	ADD	7913	1.16853	0.0765187	1.00579	1.35761	2.03546	0.0418051	neoplasms
740.11	Osteoarthrosis, localized, primary	ACE2	X	15674316	chrX:15674316:A:C	C	A	A	2868	11812	ADD	7340	0.916038	0.0430949	0.841843	0.996772	-2.03499	0.0418518	musculoskeletal
740.11	Osteoarthrosis, localized, primary	ACE2	X	15674699	chrX:15674699:T:C	C	T	T	2868	11812	ADD	7340	0.916038	0.0430949	0.841843	0.996772	-2.03499	0.0418518	musculoskeletal
740.11	Osteoarthrosis, localized, primary	ACE2	X	15675338	chrX:15675338:T:A	A	T	T	2868	11812	ADD	7340	0.916038	0.0430949	0.841843	0.996772	-2.03499	0.0418518	musculoskeletal
560.1	Paralytic ileus	ACE2	X	15675244	chrX:15675244:A:G	G	A	A	80	12050	ADD	6065	0.630773	0.2265	0.404647	0.983264	-2.03448	0.0419035	digestive
530.11	GERD	DPP4	2	162073222	chr2:162073222:G:A	G	A	A	4998	9678	ADD	7338	0.912493	0.0450286	0.835413	0.996685	-2.0337	0.0419819	digestive
253.4	Anterior pituitary disorders	TMPRSS2	21	41508701	chr21:41508701:T:G	G	T	T	16	14812	ADD	7414	3.35184	0.594887	1.04452	10.756	2.03318	0.0420346	endocrine/metabolic
531.5	Gastrojejunal ulcer	TMPRSS2	21	41508701	chr21:41508701:T:G	G	T	T	38	16886	ADD	8462	2.60998	0.471954	1.03493	6.5821	2.0327	0.0420826	digestive
444	Arterial embolism and thrombosis	DPP4	2	162073469	chr2:162073469:A:G	A	G	G	126	14400	ADD	7263	1.46361	0.187659	1.01319	2.11427	2.02977	0.0423801	circulatory system
681.7	Cellulitis and abscess of trunk	LY6E	8	143017718	chr8:143017718:G:C	C	G	G	394	13750	ADD	7072	0.746556	0.14409	0.562875	0.990175	-2.02848	0.0425108	dermatologic
743.9	Osteopenia or other disorder of bone and cartilage	ACE2	X	15674766	chrX:15674766:C:G	C	G	G	560	15886	ADD	8223	1.18138	0.0822098	1.00557	1.38792	2.0275	0.0426108	musculoskeletal
727	Other disorders of synovium, tendon, and bursa	LY6E	8	143018261	chr8:143018261:G:A	G	A	A	1070	11508	ADD	6289	0.424756	0.42236	0.18562	0.97197	-2.02728	0.0426341	musculoskeletal
509	Respiratory failure, insufficiency, arrest	DPP4	2	162073469	chr2:162073469:A:G	A	G	G	410	14020	ADD	7215	1.25374	0.11159	1.00745	1.56025	2.02646	0.0427175	respiratory
512.9	Other dypnea	ACE2	X	15674766	chrX:15674766:C:G	C	G	G	2946	7326	ADD	5136	1.0828	0.0392763	1.00257	1.16944	2.02529	0.0428379	respiratory
230	Kaposi's sarcoma	ACE2	X	15675244	chrX:15675244:A:G	G	A	A	10	17732	ADD	8871	1.98475	0.338585	1.02212	3.85397	2.02458	0.0429108	neoplasms
353.2	Nerve root lesions	DPP4	2	162074215	chr2:162074215:T:G	G	T	T	12	14182	ADD	7097	2.58202	0.468608	1.03057	6.46902	2.02423	0.0429463	neurological
230	Kaposi's sarcoma	ACE2	X	15674316	chrX:15674316:A:C	C	A	A	10	17732	ADD	8871	1.9851	0.338821	1.02183	3.85646	2.0237	0.0430011	neoplasms
230	Kaposi's sarcoma	ACE2	X	15674699	chrX:15674699:T:C	C	T	T	10	17732	ADD	8871	1.9851	0.338821	1.02183	3.85646	2.0237	0.0430011	neoplasms
230	Kaposi's sarcoma	ACE2	X	15675338	chrX:15675338:T:A	A	T	T	10	17732	ADD	8871	1.9851	0.338821	1.02183	3.85646	2.0237	0.0430011	neoplasms
420.2	Pericarditis	DPP4	2	162073222	chr2:162073222:G:A	G	A	A	280	14744	ADD	7512	1.32843	0.140359	1.00894	1.74909	2.02334	0.043038	circulatory system
257	Testicular dysfunction	ACE2	X	15675734	chrX:15675734:C:T	C	T	T	172	14812	ADD	7492	0.820601	0.0977685	0.677503	0.993923	-2.02231	0.0431443	endocrine/metabolic
253.3	Diabetes insipidus	DPP4	2	162074215	chr2:162074215:T:G	G	T	T	26	14812	ADD	7419	2.00795	0.344968	1.02121	3.94813	2.02081	0.0432994	endocrine/metabolic
312	Conduct disorders	ACE2	X	15675244	chrX:15675244:A:G	G	A	A	22	17146	ADD	8584	1.68723	0.258861	1.01585	2.80232	2.02072	0.0433082	mental disorders
798	Malaise and fatigue	LY6E	8	143017718	chr8:143017718:G:C	C	G	G	3426	11420	ADD	7423	1.10886	0.0511548	1.00308	1.2258	2.01999	0.0433843	symptoms
958	Certain early complications of trauma or procedure	TMPRSS2	21	41508700	chr21:41508700:G:A	G	A	A	28	17524	ADD	8776	3.29098	0.589733	1.03596	10.4546	2.01987	0.0433966	injuries & poisonings
562	Diverticulosis and diverticulitis	DPP4	2	162074215	chr2:162074215:T:G	G	T	T	502	12050	ADD	6276	0.812692	0.102692	0.664529	0.993889	-2.01966	0.043419	digestive
312	Conduct disorders	ACE2	X	15674316	chrX:15674316:A:C	C	A	A	22	17146	ADD	8584	1.68642	0.258802	1.01549	2.80065	2.01935	0.0434513	mental disorders
312	Conduct disorders	ACE2	X	15674699	chrX:15674699:T:C	C	T	T	22	17146	ADD	8584	1.68642	0.258802	1.01549	2.80065	2.01935	0.0434513	mental disorders
312	Conduct disorders	ACE2	X	15675338	chrX:15675338:T:A	A	T	T	22	17146	ADD	8584	1.68642	0.258802	1.01549	2.80065	2.01935	0.0434513	mental disorders
380	Disorders of external ear	LY6E	8	143018261	chr8:143018261:G:A	G	A	A	6	15950	ADD	7978	4.38003	0.731639	1.04401	18.3759	2.01883	0.0435048	sense organs
946	Anaphylactic shock NOS	TMPRSS2	21	41508700	chr21:41508700:G:A	G	A	A	146	12656	ADD	6401	2.38092	0.429874	1.02527	5.5291	2.01801	0.0435903	injuries & poisonings
242	Thyrotoxicosis with or without goiter	ACE2	X	15675734	chrX:15675734:C:T	C	T	T	520	14014	ADD	7267	1.17881	0.0815249	1.00473	1.38305	2.0179	0.0436021	endocrine/metabolic
740.11	Osteoarthrosis, localized, primary	ACE2	X	15675244	chrX:15675244:A:G	G	A	A	2868	11812	ADD	7340	0.916715	0.0431004	0.842456	0.997519	-2.01759	0.0436339	musculoskeletal
276.4	Acid-base balance disorder	LY6E	8	143017718	chr8:143017718:G:C	C	G	G	316	11046	ADD	5681	0.720716	0.162489	0.524147	0.991003	-2.01558	0.0438436	endocrine/metabolic
415.2	Chronic pulmonary heart disease	LY6E	8	143018261	chr8:143018261:G:A	G	A	A	1364	14402	ADD	7883	0.514474	0.329966	0.269461	0.98227	-2.01418	0.0439908	circulatory system
791	Gangrene	DPP4	2	162073199	chr2:162073199:T:G	T	G	G	80	17544	ADD	8812	1.59618	0.232222	1.01255	2.51623	2.01366	0.0440455	symptoms
686.3	Pilonidal cyst	LY6E	8	143018292	chr8:143018292:C:A	C	A	A	38	13750	ADD	6894	2.11775	0.372845	1.01978	4.39785	2.01251	0.0441664	dermatologic
202	Cancer of other lymphoid, histiocytic tissue	ACE2	X	15674766	chrX:15674766:C:G	C	G	G	138	17048	ADD	8593	1.33306	0.142867	1.00749	1.76383	2.01218	0.0442011	neoplasms
585.2	Renal failure NOS	DPP4	2	162074215	chr2:162074215:T:G	G	T	T	348	10540	ADD	5444	1.25929	0.114618	1.00592	1.57649	2.01146	0.0442769	genitourinary
300.8	Acute reaction to stress	ACE2	X	15674766	chrX:15674766:C:G	C	G	G	96	7042	ADD	3569	1.45731	0.187316	1.00951	2.10376	2.01048	0.0443804	mental disorders
701.4	Keloid scar	ACE2	X	15675244	chrX:15675244:A:G	G	A	A	180	15778	ADD	7979	1.30932	0.13407	1.00676	1.70281	2.01022	0.0444081	dermatologic
315	Develomental delays and disorders	ACE2	X	15675244	chrX:15675244:A:G	G	A	A	50	17146	ADD	8598	1.55325	0.219082	1.01101	2.38629	2.00997	0.0444347	mental disorders
368	Visual disturbances	LY6E	8	143018292	chr8:143018292:C:A	C	A	A	908	14796	ADD	7852	1.22521	0.101062	1.00505	1.4936	2.0098	0.0444528	sense organs
261.4	Vitamin D deficiency	LY6E	8	143018292	chr8:143018292:C:A	C	A	A	2756	11776	ADD	7266	1.14164	0.0659281	1.00326	1.29911	2.00926	0.0445099	endocrine/metabolic
1011	Complications of surgical and medical procedures	DPP4	2	162073222	chr2:162073222:G:A	G	A	A	364	16660	ADD	8512	0.748876	0.143997	0.564729	0.993071	-2.00825	0.0446163	NULL
315	Develomental delays and disorders	ACE2	X	15674316	chrX:15674316:A:C	C	A	A	50	17146	ADD	8598	1.55263	0.219078	1.01062	2.38533	2.0082	0.0446215	mental disorders
315	Develomental delays and disorders	ACE2	X	15674699	chrX:15674699:T:C	C	T	T	50	17146	ADD	8598	1.55263	0.219078	1.01062	2.38533	2.0082	0.0446215	mental disorders
315	Develomental delays and disorders	ACE2	X	15675338	chrX:15675338:T:A	A	T	T	50	17146	ADD	8598	1.55263	0.219078	1.01062	2.38533	2.0082	0.0446215	mental disorders
726.4	Calcaneal spur; Exostosis NOS	LY6E	8	143018292	chr8:143018292:C:A	C	A	A	70	11508	ADD	5789	1.80069	0.292889	1.01422	3.19702	2.00816	0.0446263	musculoskeletal
701.4	Keloid scar	ACE2	X	15674316	chrX:15674316:A:C	C	A	A	180	15778	ADD	7979	1.30891	0.134077	1.00643	1.7023	2.00778	0.0446663	dermatologic
701.4	Keloid scar	ACE2	X	15674699	chrX:15674699:T:C	C	T	T	180	15778	ADD	7979	1.30891	0.134077	1.00643	1.7023	2.00778	0.0446663	dermatologic
701.4	Keloid scar	ACE2	X	15675338	chrX:15675338:T:A	A	T	T	180	15778	ADD	7979	1.30891	0.134077	1.00643	1.7023	2.00778	0.0446663	dermatologic
367.9	Blindness and low vision	ACE2	X	15675734	chrX:15675734:C:T	C	T	T	238	14070	ADD	7154	0.803653	0.108893	0.6492	0.994851	-2.00737	0.0447105	sense organs
451	Phlebitis and thrombophlebitis	LY6E	8	143018292	chr8:143018292:C:A	C	A	A	150	11138	ADD	5644	1.50714	0.204479	1.00949	2.25013	2.00615	0.0448403	circulatory system
230	Kaposi's sarcoma	DPP4	2	162073469	chr2:162073469:A:G	A	G	G	10	17732	ADD	8871	2.3433	0.424723	1.0193	5.38706	2.00498	0.0449654	neoplasms
577.2	Chronic pancreatitis	ACE2	X	15675244	chrX:15675244:A:G	G	A	A	90	17022	ADD	8556	1.36	0.153459	1.00673	1.83723	2.00369	0.0451033	digestive
743.9	Osteopenia or other disorder of bone and cartilage	LY6E	8	143017718	chr8:143017718:G:C	C	G	G	560	15886	ADD	8223	1.24488	0.109338	1.00475	1.5424	2.00332	0.0451426	musculoskeletal
755.4	Congenital anomalies of upper limb, including shoulder girdle	DPP4	2	162073199	chr2:162073199:T:G	T	G	G	8	17192	ADD	8600	2.44828	0.446997	1.01948	5.87958	2.00312	0.0451645	congenital anomalies
071	Human immunodeficiency virus [HIV] disease	DPP4	2	162073199	chr2:162073199:T:G	T	G	G	552	12338	ADD	6445	1.22077	0.0995973	1.00428	1.48392	2.00287	0.0451911	infectious diseases
724.8	Other symptoms referable to back	DPP4	2	162073199	chr2:162073199:T:G	T	G	G	152	13702	ADD	6927	1.42273	0.176049	1.00755	2.00898	2.00271	0.0452079	musculoskeletal
008.6	Viral Enteritis	TMPRSS2	21	41508700	chr21:41508700:G:A	G	A	A	104	16266	ADD	8185	2.24079	0.403047	1.01702	4.93715	2.00183	0.0453034	infectious diseases
361	Retinal detachments and defects	DPP4	2	162074215	chr2:162074215:T:G	G	T	T	120	14542	ADD	7331	0.665386	0.203508	0.446527	0.991517	-2.00182	0.0453037	sense organs
427.3	Other specified cardiac dysrhythmias	LY6E	8	143018261	chr8:143018261:G:A	G	A	A	900	8980	ADD	4940	0.389827	0.470716	0.154952	0.980722	-2.00132	0.0453581	circulatory system
577.2	Chronic pancreatitis	ACE2	X	15674316	chrX:15674316:A:C	C	A	A	90	17022	ADD	8556	1.3595	0.153512	1.00625	1.83674	2.00058	0.0454376	digestive
577.2	Chronic pancreatitis	ACE2	X	15674699	chrX:15674699:T:C	C	T	T	90	17022	ADD	8556	1.3595	0.153512	1.00625	1.83674	2.00058	0.0454376	digestive
577.2	Chronic pancreatitis	ACE2	X	15675338	chrX:15675338:T:A	A	T	T	90	17022	ADD	8556	1.3595	0.153512	1.00625	1.83674	2.00058	0.0454376	digestive
701.1	Keratoderma, acquired	ACE2	X	15675244	chrX:15675244:A:G	G	A	A	30	15778	ADD	7904	1.80868	0.296277	1.01198	3.23262	2.00016	0.0454832	dermatologic
555.1	Regional enteritis	LY6E	8	143018261	chr8:143018261:G:A	G	A	A	112	12050	ADD	6081	2.55195	0.46844	1.01891	6.3916	1.99995	0.0455053	digestive
800.2	Fracture of unspecified part of femur	DPP4	2	162073222	chr2:162073222:G:A	G	A	A	46	15624	ADD	7835	1.71519	0.269812	1.01076	2.91056	1.99962	0.0455418	injuries & poisonings
200	Myeloproliferative disease	DPP4	2	162073469	chr2:162073469:A:G	A	G	G	134	17048	ADD	8591	0.645353	0.219039	0.420098	0.991388	-1.99945	0.0455595	neoplasms
619.3	Noninflammatory disorders of cervix	DPP4	2	162073469	chr2:162073469:A:G	A	G	G	90	14484	ADD	7287	0.574326	0.27741	0.333446	0.989214	-1.99906	0.0456023	genitourinary
350.3	Lack of coordination	TMPRSS2	21	41508700	chr21:41508700:G:A	G	A	A	60	14758	ADD	7409	2.93978	0.539509	1.02114	8.46342	1.99873	0.0456372	neurological
594.2	Calculus of lower urinary tract	TMPRSS2	21	41508700	chr21:41508700:G:A	G	A	A	32	16644	ADD	8338	3.33066	0.601983	1.02358	10.8378	1.99868	0.0456431	genitourinary
701.1	Keratoderma, acquired	ACE2	X	15674316	chrX:15674316:A:C	C	A	A	30	15778	ADD	7904	1.80742	0.296315	1.0112	3.2306	1.99754	0.0457663	dermatologic
701.1	Keratoderma, acquired	ACE2	X	15674699	chrX:15674699:T:C	C	T	T	30	15778	ADD	7904	1.80742	0.296315	1.0112	3.2306	1.99754	0.0457663	dermatologic
701.1	Keratoderma, acquired	ACE2	X	15675338	chrX:15675338:T:A	A	T	T	30	15778	ADD	7904	1.80742	0.296315	1.0112	3.2306	1.99754	0.0457663	dermatologic
752	Nervous system congenital anomalies	DPP4	2	162073469	chr2:162073469:A:G	A	G	G	32	17474	ADD	8753	0.359279	0.512515	0.131576	0.981037	-1.99732	0.0457905	congenital anomalies
512.7	Shortness of breath	ACE2	X	15674316	chrX:15674316:A:C	C	A	A	4280	7326	ADD	5803	0.927086	0.0379189	0.860683	0.998612	-1.9966	0.0458685	respiratory
512.7	Shortness of breath	ACE2	X	15674699	chrX:15674699:T:C	C	T	T	4280	7326	ADD	5803	0.927086	0.0379189	0.860683	0.998612	-1.9966	0.0458685	respiratory
512.7	Shortness of breath	ACE2	X	15675244	chrX:15675244:A:G	G	A	A	4280	7326	ADD	5803	0.927086	0.0379189	0.860683	0.998612	-1.9966	0.0458685	respiratory
512.7	Shortness of breath	ACE2	X	15675338	chrX:15675338:T:A	A	T	T	4280	7326	ADD	5803	0.927086	0.0379189	0.860683	0.998612	-1.9966	0.0458685	respiratory
257.1	Testicular hypofunction	TMPRSS2	21	41508701	chr21:41508701:T:G	G	T	T	292	14812	ADD	7552	1.57043	0.226079	1.00827	2.446	1.99641	0.045889	endocrine/metabolic
733.6	Costochondritis	TMPRSS2	21	41508700	chr21:41508700:G:A	G	A	A	48	14128	ADD	7088	2.70192	0.49797	1.01812	7.17042	1.99603	0.0459309	musculoskeletal
562.1	Diverticulosis	DPP4	2	162073199	chr2:162073199:T:G	T	G	G	794	12050	ADD	6422	1.1896	0.0870062	1.0031	1.41079	1.99548	0.0459902	digestive
603	Other disorders of testis	DPP4	2	162074215	chr2:162074215:T:G	G	T	T	48	14468	ADD	7258	0.512735	0.334765	0.266036	0.988201	-1.99542	0.0459971	genitourinary
610.2	Fibroadenosis of breast	TMPRSS2	21	41508701	chr21:41508701:T:G	G	T	T	6	14402	ADD	7204	3.12979	0.571903	1.02026	9.60108	1.99503	0.0460391	genitourinary
600	Hyperplasia of prostate	TMPRSS2	21	41508700	chr21:41508700:G:A	G	A	A	1080	15234	ADD	8157	1.77624	0.288104	1.00988	3.12418	1.99407	0.046144	genitourinary
510	Other diseases of lung	LY6E	8	143018261	chr8:143018261:G:A	G	A	A	566	16598	ADD	8582	0.240678	0.714274	0.0593534	0.97595	-1.99405	0.046147	respiratory
110.12	Althete's foot	ACE2	X	15675244	chrX:15675244:A:G	G	A	A	286	12868	ADD	6577	1.22221	0.100722	1.00325	1.48894	1.99219	0.0463499	infectious diseases
597.1	Urethral stricture (not specified as infectious)	TMPRSS2	21	41508701	chr21:41508701:T:G	G	T	T	102	16060	ADD	8081	1.97935	0.342853	1.01085	3.87579	1.99144	0.0464327	genitourinary
529	Diseases and other conditions of the tongue	DPP4	2	162073222	chr2:162073222:G:A	G	A	A	52	16206	ADD	8129	1.75547	0.28265	1.00879	3.05481	1.99093	0.0464888	digestive
222	Benign neoplasm of male genital organs	TMPRSS2	21	41508701	chr21:41508701:T:G	G	T	T	8	16682	ADD	8345	3.19508	0.583746	1.01764	10.0315	1.98993	0.046599	neoplasms
729	Other disorders of soft tissues	TMPRSS2	21	41508701	chr21:41508701:T:G	G	T	T	576	11508	ADD	6042	0.606304	0.251615	0.370267	0.992809	-1.98865	0.0467402	musculoskeletal
722.7	Intervertebral disc disorder with myelopathy	TMPRSS2	21	41508700	chr21:41508700:G:A	G	A	A	72	13702	ADD	6887	2.8915	0.534012	1.01525	8.23523	1.9883	0.0467787	musculoskeletal
599.9	Other abnormality of urination	LY6E	8	143018292	chr8:143018292:C:A	C	A	A	786	10860	ADD	5823	1.2444	0.110055	1.00295	1.54397	1.98676	0.0469487	genitourinary
260.3	Adult failure to thrive	ACE2	X	15674766	chrX:15674766:C:G	C	G	G	84	11776	ADD	5930	0.712771	0.170449	0.510345	0.995489	-1.98649	0.046979	endocrine/metabolic
041.11	Methicillin sensitive Staphylococcus aureus	DPP4	2	162073199	chr2:162073199:T:G	T	G	G	98	13970	ADD	7034	0.562187	0.289995	0.318447	0.992487	-1.98597	0.0470369	infectious diseases
701.2	Scar conditions and fibrosis of skin	ACE2	X	15675244	chrX:15675244:A:G	G	A	A	128	15778	ADD	7953	1.35153	0.151684	1.00395	1.81944	1.98595	0.0470387	dermatologic
110.12	Althete's foot	ACE2	X	15674316	chrX:15674316:A:C	C	A	A	286	12868	ADD	6577	1.22121	0.10072	1.00244	1.48773	1.98413	0.0472418	infectious diseases
110.12	Althete's foot	ACE2	X	15674699	chrX:15674699:T:C	C	T	T	286	12868	ADD	6577	1.22121	0.10072	1.00244	1.48773	1.98413	0.0472418	infectious diseases
110.12	Althete's foot	ACE2	X	15675338	chrX:15675338:T:A	A	T	T	286	12868	ADD	6577	1.22121	0.10072	1.00244	1.48773	1.98413	0.0472418	infectious diseases
1002	Symptoms concerning nutrition, metabolism, and development	TMPRSS2	21	41508700	chr21:41508700:G:A	G	A	A	710	16368	ADD	8539	1.60116	0.237257	1.00573	2.54911	1.98403	0.0472523	NULL
527.7	Disturbance of salivary secretion	DPP4	2	162073469	chr2:162073469:A:G	A	G	G	150	16206	ADD	8178	1.40804	0.172491	1.00413	1.97441	1.98385	0.0472721	digestive
257	Testicular dysfunction	TMPRSS2	21	41508700	chr21:41508700:G:A	G	A	A	172	14812	ADD	7492	2.03134	0.357318	1.0084	4.09196	1.98337	0.0473264	endocrine/metabolic
701.2	Scar conditions and fibrosis of skin	ACE2	X	15674316	chrX:15674316:A:C	C	A	A	128	15778	ADD	7953	1.35097	0.151677	1.00355	1.81867	1.9833	0.0473336	dermatologic
701.2	Scar conditions and fibrosis of skin	ACE2	X	15674699	chrX:15674699:T:C	C	T	T	128	15778	ADD	7953	1.35097	0.151677	1.00355	1.81867	1.9833	0.0473336	dermatologic
701.2	Scar conditions and fibrosis of skin	ACE2	X	15675338	chrX:15675338:T:A	A	T	T	128	15778	ADD	7953	1.35097	0.151677	1.00355	1.81867	1.9833	0.0473336	dermatologic
246	Other disorders of thyroid	LY6E	8	143017718	chr8:143017718:G:C	C	G	G	210	14014	ADD	7112	1.35704	0.15405	1.00338	1.83535	1.98185	0.0474961	endocrine/metabolic
110.11	Dermatophytosis of nail	ACE2	X	15675734	chrX:15675734:C:T	C	T	T	492	12868	ADD	6680	0.858416	0.0770414	0.738108	0.998334	-1.98161	0.0475226	infectious diseases
071.1	HIV infection, symptomatic	DPP4	2	162073199	chr2:162073199:T:G	T	G	G	536	12338	ADD	6437	1.22193	0.101188	1.00211	1.48997	1.98078	0.0476155	infectious diseases
229	Benign neoplasm of unspecified sites	ACE2	X	15675734	chrX:15675734:C:T	C	T	T	56	17594	ADD	8825	1.60044	0.2375	1.0048	2.54918	1.98013	0.0476889	neoplasms
242	Thyrotoxicosis with or without goiter	ACE2	X	15674766	chrX:15674766:C:G	C	G	G	520	14014	ADD	7267	1.17558	0.0816988	1.00164	1.37974	1.98002	0.0477014	endocrine/metabolic
737	Curvature of spine	TMPRSS2	21	41508701	chr21:41508701:T:G	G	T	T	56	15480	ADD	7768	2.24921	0.409432	1.00814	5.01809	1.97977	0.0477298	musculoskeletal
612	Breast conditions, congenital or relating to hormones	DPP4	2	162073199	chr2:162073199:T:G	T	G	G	108	14402	ADD	7255	0.577392	0.277434	0.335212	0.994542	-1.97969	0.0477382	genitourinary
362.21	Macular degeneration, dry	LY6E	8	143017718	chr8:143017718:G:C	C	G	G	18	13982	ADD	7000	1.93358	0.333171	1.00639	3.715	1.97909	0.0478062	sense organs
458	Hypotension	ACE2	X	15674316	chrX:15674316:A:C	C	A	A	418	12600	ADD	6509	0.826096	0.0965501	0.683671	0.998192	-1.9787	0.0478496	circulatory system
458	Hypotension	ACE2	X	15674699	chrX:15674699:T:C	C	T	T	418	12600	ADD	6509	0.826096	0.0965501	0.683671	0.998192	-1.9787	0.0478496	circulatory system
458	Hypotension	ACE2	X	15675338	chrX:15675338:T:A	A	T	T	418	12600	ADD	6509	0.826096	0.0965501	0.683671	0.998192	-1.9787	0.0478496	circulatory system
743.9	Osteopenia or other disorder of bone and cartilage	LY6E	8	143018292	chr8:143018292:C:A	C	A	A	560	15886	ADD	8223	0.737798	0.153691	0.545903	0.997149	-1.97854	0.0478676	musculoskeletal
764	Sciatica	ACE2	X	15675734	chrX:15675734:C:T	C	T	T	1468	13410	ADD	7439	1.10245	0.0493059	1.0009	1.21431	1.97817	0.0479098	symptoms
556.1	Ulceration of intestine	ACE2	X	15674766	chrX:15674766:C:G	C	G	G	24	12050	ADD	6037	0.544437	0.307384	0.298059	0.994475	-1.97799	0.0479302	digestive
979	Adverse drug events and drug allergies	DPP4	2	162073199	chr2:162073199:T:G	T	G	G	418	12966	ADD	6692	1.24816	0.112081	1.00199	1.55479	1.97773	0.047959	injuries & poisonings
041.11	Methicillin sensitive Staphylococcus aureus	DPP4	2	162074215	chr2:162074215:T:G	G	T	T	98	13970	ADD	7034	1.49916	0.204746	1.00362	2.23938	1.9776	0.047974	infectious diseases
257	Testicular dysfunction	ACE2	X	15674766	chrX:15674766:C:G	C	G	G	172	14812	ADD	7492	0.82498	0.0973277	0.681707	0.998364	-1.97679	0.0480652	endocrine/metabolic
969	Poisoning by psychotropic agents	TMPRSS2	21	41508701	chr21:41508701:T:G	G	T	T	82	12966	ADD	6524	2.10565	0.376797	1.00614	4.40673	1.9762	0.0481321	injuries & poisonings
696.41	Psoriasis vulgaris	DPP4	2	162073469	chr2:162073469:A:G	A	G	G	144	13140	ADD	6642	1.42412	0.178946	1.00283	2.02239	1.97576	0.0481817	dermatologic
653	Problems associated with amniotic cavity and membranes	ACE2	X	15675244	chrX:15675244:A:G	G	A	A	254	16468	ADD	8361	1.21751	0.099679	1.00144	1.4802	1.97441	0.048335	pregnancy complications
653	Problems associated with amniotic cavity and membranes	ACE2	X	15674316	chrX:15674316:A:C	C	A	A	254	16468	ADD	8361	1.2173	0.0996371	1.00135	1.47982	1.97352	0.0484361	pregnancy complications
653	Problems associated with amniotic cavity and membranes	ACE2	X	15674699	chrX:15674699:T:C	C	T	T	254	16468	ADD	8361	1.2173	0.0996371	1.00135	1.47982	1.97352	0.0484361	pregnancy complications
653	Problems associated with amniotic cavity and membranes	ACE2	X	15675338	chrX:15675338:T:A	A	T	T	254	16468	ADD	8361	1.2173	0.0996371	1.00135	1.47982	1.97352	0.0484361	pregnancy complications
250.4	Abnormal glucose	DPP4	2	162073222	chr2:162073222:G:A	G	A	A	1884	9124	ADD	5504	0.877875	0.0660404	0.771293	0.999187	-1.97229	0.0485769	endocrine/metabolic
274.11	Gouty arthropathy	DPP4	2	162073469	chr2:162073469:A:G	A	G	G	478	16026	ADD	8252	1.22999	0.104969	1.00127	1.51095	1.97205	0.0486043	endocrine/metabolic
800.1	Fracture of neck of femur	TMPRSS2	21	41508701	chr21:41508701:T:G	G	T	T	48	15624	ADD	7836	2.35523	0.434469	1.00511	5.51892	1.97169	0.0486446	injuries & poisonings
742.8	Articular cartilage disorder	LY6E	8	143018261	chr8:143018261:G:A	G	A	A	12	14448	ADD	7230	4.49371	0.76267	1.0079	20.0351	1.97029	0.0488056	musculoskeletal
428.2	Heart failure NOS	LY6E	8	143018292	chr8:143018292:C:A	C	A	A	266	12776	ADD	6521	1.40029	0.170922	1.00168	1.95752	1.96978	0.0488636	circulatory system
458	Hypotension	ACE2	X	15675244	chrX:15675244:A:G	G	A	A	418	12600	ADD	6509	0.82681	0.0965598	0.684249	0.999074	-1.96956	0.0488894	circulatory system
803.1	Fracture of humerus	DPP4	2	162073199	chr2:162073199:T:G	T	G	G	78	15624	ADD	7851	0.533953	0.318722	0.285895	0.99724	-1.96863	0.0489951	injuries & poisonings
585.34	Chronic Kidney Disease, Stage IV	DPP4	2	162074215	chr2:162074215:T:G	G	T	T	784	10540	ADD	5662	1.17293	0.0810329	1.00068	1.37483	1.9684	0.0490223	genitourinary
764	Sciatica	LY6E	8	143017718	chr8:143017718:G:C	C	G	G	1468	13410	ADD	7439	1.14735	0.0698911	1.00047	1.3158	1.96674	0.0492131	symptoms
458	Hypotension	TMPRSS2	21	41508700	chr21:41508700:G:A	G	A	A	418	12600	ADD	6509	0.138721	1.00484	0.0193563	0.994178	-1.96577	0.0493246	circulatory system
250	Diabetes mellitus	ACE2	X	15675734	chrX:15675734:C:T	C	T	T	4350	9124	ADD	6737	1.06808	0.0335119	1.00018	1.14059	1.96528	0.0493821	endocrine/metabolic
292	Neurological disorders	LY6E	8	143018261	chr8:143018261:G:A	G	A	A	738	14340	ADD	7539	1.72753	0.278192	1.00145	2.98004	1.96516	0.0493961	mental disorders
041.12	Methicillin resistant Staphylococcus aureus	TMPRSS2	21	41508701	chr21:41508701:T:G	G	T	T	108	13970	ADD	7039	1.92517	0.333387	1.00159	3.7004	1.96472	0.0494462	infectious diseases
259.2	Carcinoid syndrome	LY6E	8	143017718	chr8:143017718:G:C	C	G	G	18	14812	ADD	7415	2.16821	0.393907	1.00186	4.69242	1.96468	0.0494508	endocrine/metabolic
528	Diseases of the oral soft tissues, excluding lesions specific for gingiva and tongue	ACE2	X	15675244	chrX:15675244:A:G	G	A	A	170	16206	ADD	8188	1.29479	0.13151	1.00059	1.67549	1.96448	0.0494743	digestive
740.9	Osteoarthrosis NOS	LY6E	8	143017718	chr8:143017718:G:C	C	G	G	2110	11812	ADD	6961	1.13471	0.0643375	1.00027	1.2872	1.96422	0.0495044	musculoskeletal
291	Other specified nonpsychotic and/or transient mental disorders	DPP4	2	162074215	chr2:162074215:T:G	G	T	T	130	14340	ADD	7235	1.40783	0.174331	1.00037	1.98125	1.96206	0.0497553	mental disorders
379.4	Anomalies of pupillary function	LY6E	8	143018261	chr8:143018261:G:A	G	A	A	10	14222	ADD	7116	4.24569	0.737286	1.00085	18.0105	1.96112	0.0498656	sense organs
528	Diseases of the oral soft tissues, excluding lesions specific for gingiva and tongue	ACE2	X	15674316	chrX:15674316:A:C	C	A	A	170	16206	ADD	8188	1.2941	0.131506	1.00006	1.67457	1.96045	0.0499427	digestive
528	Diseases of the oral soft tissues, excluding lesions specific for gingiva and tongue	ACE2	X	15674699	chrX:15674699:T:C	C	T	T	170	16206	ADD	8188	1.2941	0.131506	1.00006	1.67457	1.96045	0.0499427	digestive
528	Diseases of the oral soft tissues, excluding lesions specific for gingiva and tongue	ACE2	X	15675338	chrX:15675338:T:A	A	T	T	170	16206	ADD	8188	1.2941	0.131506	1.00006	1.67457	1.96045	0.0499427	digestive
246.7	Abnormal results of function study of thyroid	LY6E	8	143017718	chr8:143017718:G:C	C	G	G	120	14014	ADD	7067	1.50714	0.209264	1.00007	2.27133	1.96028	0.0499631	endocrine/metabolic
560.3	Peritoneal or intestinal adhesions	DPP4	2	162073222	chr2:162073222:G:A	G	A	A	26	12050	ADD	6038	2.03695	0.363067	0.999854	4.14976	1.95956	0.0500469	digestive
272.1	Hyperlipidemia	ACE2	X	15675734	chrX:15675734:C:T	C	T	T	7020	8752	ADD	7886	1.06459	0.0319521	0.999965	1.13339	1.95888	0.0501267	endocrine/metabolic
070.1	Viral hepatitis A	TMPRSS2	21	41508700	chr21:41508700:G:A	G	A	A	4	12338	ADD	6171	4.05827	0.715564	0.99828	16.4979	1.95756	0.0502819	infectious diseases
579	Other symptoms involving abdomen and pelvis	DPP4	2	162073199	chr2:162073199:T:G	T	G	G	324	14128	ADD	7226	0.754601	0.143897	0.569157	1.00047	-1.95672	0.0503806	digestive
380.4	Impacted cerumen	LY6E	8	143018292	chr8:143018292:C:A	C	A	A	584	15950	ADD	8267	1.273	0.12337	0.999579	1.62122	1.95655	0.0504004	sense organs
635	Hemorrhage during pregnancy; childbirth and postpartum	ACE2	X	15674766	chrX:15674766:C:G	C	G	G	150	16082	ADD	8116	1.2719	0.12297	0.999496	1.61855	1.95586	0.0504811	pregnancy complications
401.3	Other hypertensive complications	DPP4	2	162074215	chr2:162074215:T:G	G	T	T	846	5666	ADD	3256	1.17434	0.0821871	0.999625	1.3796	1.9554	0.0505357	circulatory system
626.12	Excessive or frequent menstruation	ACE2	X	15675734	chrX:15675734:C:T	C	T	T	794	12686	ADD	6740	1.16039	0.0760832	0.99964	1.347	1.95523	0.0505565	genitourinary
278.1	Obesity	DPP4	2	162073222	chr2:162073222:G:A	G	A	A	6712	8180	ADD	7446	0.921327	0.0419212	0.848654	1.00022	-1.95462	0.0506282	endocrine/metabolic
276.41	Acidosis	LY6E	8	143018292	chr8:143018292:C:A	C	A	A	660	11046	ADD	5853	1.25807	0.117487	0.999312	1.58384	1.9541	0.0506889	endocrine/metabolic
803.2	Fracture of radius and ulna	LY6E	8	143017718	chr8:143017718:G:C	C	G	G	156	15624	ADD	7890	1.43964	0.186555	0.998749	2.07514	1.95326	0.0507893	injuries & poisonings
705.3	Hidradenitis	TMPRSS2	21	41508700	chr21:41508700:G:A	G	A	A	154	14256	ADD	7205	2.29322	0.424938	0.997098	5.27416	1.95313	0.0508047	dermatologic
427.11	Paroxysmal supraventricular tachycardia	LY6E	8	143017718	chr8:143017718:G:C	C	G	G	542	8980	ADD	4761	1.24153	0.110785	0.999213	1.54262	1.95286	0.0508361	circulatory system
735	Acquired foot deformities	ACE2	X	15675734	chrX:15675734:C:T	C	T	T	354	15480	ADD	7917	0.829034	0.0960195	0.686816	1.0007	-1.95266	0.0508598	musculoskeletal
255	Disorders of adrenal glands	LY6E	8	143017718	chr8:143017718:G:C	C	G	G	204	14812	ADD	7508	1.37944	0.164841	0.998592	1.90552	1.95142	0.0510074	endocrine/metabolic
198.6	Secondary malignancy of bone	TMPRSS2	21	41508700	chr21:41508700:G:A	G	A	A	164	15350	ADD	7757	2.19038	0.402138	0.995906	4.81748	1.94976	0.0512043	neoplasms
427.6	Premature beats	TMPRSS2	21	41508700	chr21:41508700:G:A	G	A	A	544	8980	ADD	4762	0.405501	0.462955	0.163653	1.00475	-1.94972	0.0512096	circulatory system
289.4	Lymphadenitis	TMPRSS2	21	41508701	chr21:41508701:T:G	G	T	T	696	13698	ADD	7197	0.656641	0.215742	0.430218	1.00223	-1.94964	0.051219	hematopoietic
585.3	Chronic renal failure [CKD]	DPP4	2	162074215	chr2:162074215:T:G	G	T	T	2990	10540	ADD	6765	1.09707	0.0475189	0.999507	1.20415	1.94958	0.0512266	genitourinary
521	Diseases of hard tissues of teeth	DPP4	2	162074215	chr2:162074215:T:G	G	T	T	176	15118	ADD	7647	1.34463	0.151895	0.998407	1.8109	1.94947	0.0512397	digestive
440.9	Atherosclerosis of aorta	TMPRSS2	21	41508701	chr21:41508701:T:G	G	T	T	52	14400	ADD	7226	2.11604	0.384504	0.995942	4.49588	1.94939	0.0512489	circulatory system
480.1	Bacterial pneumonia	DPP4	2	162074215	chr2:162074215:T:G	G	T	T	140	13578	ADD	6859	0.690054	0.190341	0.475187	1.00208	-1.94906	0.0512884	respiratory
704	Diseases of hair and hair follicles	LY6E	8	143017718	chr8:143017718:G:C	C	G	G	432	15434	ADD	7933	1.26248	0.119597	0.998673	1.59597	1.94886	0.0513122	dermatologic
760	Back pain	LY6E	8	143017718	chr8:143017718:G:C	C	G	G	4894	10326	ADD	7610	1.09179	0.0450604	0.999499	1.1926	1.94885	0.0513131	symptoms
496.3	Bronchiectasis	TMPRSS2	21	41508701	chr21:41508701:T:G	G	T	T	102	11930	ADD	6016	1.95322	0.343534	0.996173	3.82973	1.9488	0.0513188	respiratory
454.11	Varicose veins of lower extremity, symptomtic	DPP4	2	162073222	chr2:162073222:G:A	G	A	A	220	11138	ADD	5679	0.693992	0.18745	0.480615	1.0021	-1.94875	0.0513247	circulatory system
276.11	Hyperosmolality and/or hypernatremia	LY6E	8	143018292	chr8:143018292:C:A	C	A	A	130	11046	ADD	5588	1.52492	0.216593	0.997428	2.33137	1.94807	0.0514062	endocrine/metabolic
155	Cancer of liver and intrahepatic bile duct	ACE2	X	15675244	chrX:15675244:A:G	G	A	A	98	16170	ADD	8134	1.3427	0.151315	0.998114	1.80625	1.94749	0.0514765	neoplasms
433.11	Occlusion of cerebral arteries, with cerebral infarction	ACE2	X	15674766	chrX:15674766:C:G	C	G	G	106	14764	ADD	7435	0.730787	0.161088	0.532932	1.0021	-1.94696	0.051539	circulatory system
743.4	Stress fracture	ACE2	X	15674766	chrX:15674766:C:G	C	G	G	52	15886	ADD	7969	0.606316	0.2571	0.366316	1.00356	-1.94614	0.0516373	musculoskeletal
952	Spinal cord injury without evidence of spinal bone injury	LY6E	8	143018261	chr8:143018261:G:A	G	A	A	28	17684	ADD	8856	4.30795	0.75047	0.989621	18.753	1.94606	0.0516473	injuries & poisonings
741	Symptoms and disorders of the joints	LY6E	8	143018292	chr8:143018292:C:A	C	A	A	606	14448	ADD	7527	0.754652	0.144735	0.568261	1.00218	-1.94492	0.0517841	musculoskeletal
189	Cancer of urinary organs (incl. kidney and bladder)	ACE2	X	15674316	chrX:15674316:A:C	C	A	A	312	17146	ADD	8729	0.822986	0.10018	0.676268	1.00153	-1.94467	0.0518148	neoplasms
189	Cancer of urinary organs (incl. kidney and bladder)	ACE2	X	15674699	chrX:15674699:T:C	C	T	T	312	17146	ADD	8729	0.822986	0.10018	0.676268	1.00153	-1.94467	0.0518148	neoplasms
189	Cancer of urinary organs (incl. kidney and bladder)	ACE2	X	15675338	chrX:15675338:T:A	A	T	T	312	17146	ADD	8729	0.822986	0.10018	0.676268	1.00153	-1.94467	0.0518148	neoplasms
800	Fracture of lower limb	TMPRSS2	21	41508700	chr21:41508700:G:A	G	A	A	198	15624	ADD	7911	2.06233	0.372235	0.994285	4.27765	1.94457	0.0518271	injuries & poisonings
227.3	Benign neoplasm of pituitary gland and craniopharyngeal duct (pouch)	DPP4	2	162074215	chr2:162074215:T:G	G	T	T	126	17026	ADD	8576	0.679599	0.198686	0.460395	1.00317	-1.94403	0.0518913	neoplasms
362	Other retinal disorders	TMPRSS2	21	41508701	chr21:41508701:T:G	G	T	T	464	13982	ADD	7223	1.45386	0.192539	0.996859	2.12037	1.94362	0.0519407	sense organs
411.41	Aneurysm and dissection of heart	ACE2	X	15674316	chrX:15674316:A:C	C	A	A	22	13054	ADD	6538	1.99266	0.354772	0.994147	3.99407	1.94342	0.0519656	circulatory system
411.41	Aneurysm and dissection of heart	ACE2	X	15674699	chrX:15674699:T:C	C	T	T	22	13054	ADD	6538	1.99266	0.354772	0.994147	3.99407	1.94342	0.0519656	circulatory system
411.41	Aneurysm and dissection of heart	ACE2	X	15675244	chrX:15675244:A:G	G	A	A	22	13054	ADD	6538	1.99266	0.354772	0.994147	3.99407	1.94342	0.0519656	circulatory system
411.41	Aneurysm and dissection of heart	ACE2	X	15675338	chrX:15675338:T:A	A	T	T	22	13054	ADD	6538	1.99266	0.354772	0.994147	3.99407	1.94342	0.0519656	circulatory system
626.1	Irregular menstrual cycle/bleeding	DPP4	2	162074215	chr2:162074215:T:G	G	T	T	1306	12686	ADD	6996	1.13696	0.0660927	0.998818	1.2942	1.94207	0.0521281	genitourinary
155	Cancer of liver and intrahepatic bile duct	ACE2	X	15674316	chrX:15674316:A:C	C	A	A	98	16170	ADD	8134	1.34146	0.151305	0.997213	1.80455	1.94152	0.0521956	neoplasms
155	Cancer of liver and intrahepatic bile duct	ACE2	X	15674699	chrX:15674699:T:C	C	T	T	98	16170	ADD	8134	1.34146	0.151305	0.997213	1.80455	1.94152	0.0521956	neoplasms
155	Cancer of liver and intrahepatic bile duct	ACE2	X	15675338	chrX:15675338:T:A	A	T	T	98	16170	ADD	8134	1.34146	0.151305	0.997213	1.80455	1.94152	0.0521956	neoplasms
738.4	Acquired spondylolisthesis	DPP4	2	162073469	chr2:162073469:A:G	A	G	G	168	15480	ADD	7824	1.37456	0.16394	0.996826	1.89544	1.94057	0.05231	musculoskeletal
562.1	Diverticulosis	TMPRSS2	21	41508700	chr21:41508700:G:A	G	A	A	794	12050	ADD	6422	1.57674	0.23473	0.995305	2.49782	1.93992	0.0523898	digestive
733.8	Malunion and nonunion of fracture	TMPRSS2	21	41508700	chr21:41508700:G:A	G	A	A	40	14128	ADD	7084	3.30549	0.616311	0.987713	11.0622	1.9399	0.0523913	musculoskeletal
701.2	Scar conditions and fibrosis of skin	ACE2	X	15674766	chrX:15674766:C:G	C	G	G	128	15778	ADD	7953	0.745564	0.151465	0.554062	1.00326	-1.9385	0.0525628	dermatologic
189	Cancer of urinary organs (incl. kidney and bladder)	ACE2	X	15675244	chrX:15675244:A:G	G	A	A	312	17146	ADD	8729	0.823529	0.10016	0.676741	1.00216	-1.93847	0.0525663	neoplasms
737.1	Kyphosis (acquired)	DPP4	2	162073469	chr2:162073469:A:G	A	G	G	20	15480	ADD	7750	0.257298	0.700329	0.0652101	1.01521	-1.9384	0.0525741	musculoskeletal
603	Other disorders of testis	TMPRSS2	21	41508700	chr21:41508700:G:A	G	A	A	48	14468	ADD	7258	3.66096	0.669768	0.985115	13.6051	1.93757	0.0526754	genitourinary
737.1	Kyphosis (acquired)	DPP4	2	162073222	chr2:162073222:G:A	G	A	A	20	15480	ADD	7750	0.147819	0.986693	0.0213724	1.02236	-1.93755	0.0526777	musculoskeletal
323	Encephalitis	ACE2	X	15675244	chrX:15675244:A:G	G	A	A	16	17284	ADD	8650	1.93174	0.339962	0.992141	3.7612	1.93676	0.0527751	neurological
371.3	Inflammation of eyelids	ACE2	X	15674766	chrX:15674766:C:G	C	G	G	440	14556	ADD	7498	1.18551	0.0878722	0.99795	1.40832	1.93661	0.0527927	sense organs
592.12	Chronic cystitis	TMPRSS2	21	41508701	chr21:41508701:T:G	G	T	T	22	11610	ADD	5816	2.73055	0.518771	0.987804	7.54793	1.93631	0.0528297	genitourinary
963	Poisoning by primarily systemic agents	TMPRSS2	21	41508700	chr21:41508700:G:A	G	A	A	310	12966	ADD	6638	1.90386	0.33263	0.991973	3.65402	1.93573	0.0529003	injuries & poisonings
323	Encephalitis	ACE2	X	15674316	chrX:15674316:A:C	C	A	A	16	17284	ADD	8650	1.93076	0.340009	0.991544	3.75963	1.93499	0.0529917	neurological
323	Encephalitis	ACE2	X	15674699	chrX:15674699:T:C	C	T	T	16	17284	ADD	8650	1.93076	0.340009	0.991544	3.75963	1.93499	0.0529917	neurological
323	Encephalitis	ACE2	X	15675338	chrX:15675338:T:A	A	T	T	16	17284	ADD	8650	1.93076	0.340009	0.991544	3.75963	1.93499	0.0529917	neurological
433.11	Occlusion of cerebral arteries, with cerebral infarction	LY6E	8	143018261	chr8:143018261:G:A	G	A	A	106	14764	ADD	7435	2.83579	0.53889	0.986211	8.15415	1.9342	0.0530887	circulatory system
729	Other disorders of soft tissues	TMPRSS2	21	41508700	chr21:41508700:G:A	G	A	A	576	11508	ADD	6042	0.323063	0.584205	0.102804	1.01523	-1.9341	0.0531014	musculoskeletal
454	Varicose veins	DPP4	2	162074215	chr2:162074215:T:G	G	T	T	166	11138	ADD	5652	1.30061	0.135897	0.996486	1.69755	1.93406	0.0531054	circulatory system
286.13	Congenital factor VIII disorder	DPP4	2	162073199	chr2:162073199:T:G	T	G	G	6	13656	ADD	6831	2.21943	0.412282	0.989251	4.97939	1.93375	0.0531437	hematopoietic
516	Abnormal sputum	TMPRSS2	21	41508700	chr21:41508700:G:A	G	A	A	146	16860	ADD	8503	2.30766	0.432465	0.988682	5.38626	1.93364	0.0531569	respiratory
426.91	Cardiac pacemaker in situ	ACE2	X	15674766	chrX:15674766:C:G	C	G	G	432	8980	ADD	4706	1.17761	0.0845517	0.99777	1.38986	1.93357	0.0531665	circulatory system
386.21	Central origin vertigo	TMPRSS2	21	41508701	chr21:41508701:T:G	G	T	T	10	12818	ADD	6414	3.03199	0.574052	0.984222	9.34031	1.93226	0.0533274	sense organs
840.2	Rotator cuff (capsule) sprain	ACE2	X	15675244	chrX:15675244:A:G	G	A	A	146	13340	ADD	6743	1.31615	0.142172	0.996067	1.73909	1.93225	0.053329	injuries & poisonings
565.1	Anal and rectal polyp	ACE2	X	15674766	chrX:15674766:C:G	C	G	G	50	14840	ADD	7445	0.645543	0.226505	0.414118	1.0063	-1.93225	0.0533292	digestive
272	Disorders of lipoid metabolism	ACE2	X	15675734	chrX:15675734:C:T	C	T	T	5790	8752	ADD	7271	1.06775	0.0339263	0.999055	1.14116	1.93211	0.0533459	endocrine/metabolic
853	Complication of colostomy or enterostomy	TMPRSS2	21	41508700	chr21:41508700:G:A	G	A	A	18	14420	ADD	7219	4.30445	0.755573	0.978978	18.9262	1.93184	0.0533787	injuries & poisonings
701.4	Keloid scar	DPP4	2	162073222	chr2:162073222:G:A	G	A	A	180	15778	ADD	7979	1.37901	0.166439	0.995167	1.91092	1.93086	0.0535008	dermatologic
261.1	Vitamin A deficiency	TMPRSS2	21	41508700	chr21:41508700:G:A	G	A	A	8	11776	ADD	5892	4.07347	0.728305	0.977306	16.9785	1.92845	0.0537997	endocrine/metabolic
578.9	Hemorrhage of gastrointestinal tract	LY6E	8	143018261	chr8:143018261:G:A	G	A	A	378	14128	ADD	7253	1.97172	0.3522	0.988671	3.93222	1.92761	0.0539032	digestive
459.1	Hemorrhage NOS	ACE2	X	15675734	chrX:15675734:C:T	C	T	T	36	12600	ADD	6318	0.571105	0.290684	0.323062	1.00959	-1.92712	0.0539647	circulatory system
495.2	Asthma with exacerbation	ACE2	X	15675734	chrX:15675734:C:T	C	T	T	774	11930	ADD	6352	1.14494	0.070236	0.997695	1.31392	1.9271	0.053967	respiratory
531.2	Gastric ulcer	ACE2	X	15674766	chrX:15674766:C:G	C	G	G	136	16886	ADD	8511	0.754081	0.146473	0.565901	1.00484	-1.92702	0.0539774	digestive
840.2	Rotator cuff (capsule) sprain	ACE2	X	15674316	chrX:15674316:A:C	C	A	A	146	13340	ADD	6743	1.31488	0.142111	0.995226	1.73721	1.92629	0.0540683	injuries & poisonings
840.2	Rotator cuff (capsule) sprain	ACE2	X	15674699	chrX:15674699:T:C	C	T	T	146	13340	ADD	6743	1.31488	0.142111	0.995226	1.73721	1.92629	0.0540683	injuries & poisonings
840.2	Rotator cuff (capsule) sprain	ACE2	X	15675338	chrX:15675338:T:A	A	T	T	146	13340	ADD	6743	1.31488	0.142111	0.995226	1.73721	1.92629	0.0540683	injuries & poisonings
513.31	Apnea	LY6E	8	143018292	chr8:143018292:C:A	C	A	A	56	16622	ADD	8339	1.82792	0.313272	0.989235	3.37766	1.92542	0.0541773	respiratory
070.4	Chronic hepatitis	ACE2	X	15675734	chrX:15675734:C:T	C	T	T	106	12338	ADD	6222	0.728051	0.164935	0.526949	1.0059	-1.92429	0.0543181	infectious diseases
803.1	Fracture of humerus	DPP4	2	162074215	chr2:162074215:T:G	G	T	T	78	15624	ADD	7851	1.5254	0.219493	0.992089	2.3454	1.92378	0.0543823	injuries & poisonings
681.3	Cellulitis and abscess of arm/hand	DPP4	2	162073469	chr2:162073469:A:G	A	G	G	218	13750	ADD	6984	0.717441	0.172654	0.511473	1.00635	-1.92329	0.0544434	dermatologic
994.2	Sepsis	DPP4	2	162073199	chr2:162073199:T:G	T	G	G	814	15854	ADD	8334	1.17316	0.0830373	0.996953	1.3805	1.92322	0.0544529	injuries & poisonings
213	Benign neoplasm of bone and articular cartilage	ACE2	X	15674316	chrX:15674316:A:C	C	A	A	34	7060	ADD	3547	0.441583	0.425194	0.191905	1.0161	-1.92239	0.0545566	neoplasms
213	Benign neoplasm of bone and articular cartilage	ACE2	X	15674699	chrX:15674699:T:C	C	T	T	34	7060	ADD	3547	0.441583	0.425194	0.191905	1.0161	-1.92239	0.0545566	neoplasms
213	Benign neoplasm of bone and articular cartilage	ACE2	X	15675244	chrX:15675244:A:G	G	A	A	34	7060	ADD	3547	0.441583	0.425194	0.191905	1.0161	-1.92239	0.0545566	neoplasms
213	Benign neoplasm of bone and articular cartilage	ACE2	X	15675338	chrX:15675338:T:A	A	T	T	34	7060	ADD	3547	0.441583	0.425194	0.191905	1.0161	-1.92239	0.0545566	neoplasms
571.5	Other chronic nonalcoholic liver disease	DPP4	2	162073222	chr2:162073222:G:A	G	A	A	764	14022	ADD	7393	1.18644	0.0889438	0.996635	1.41239	1.92206	0.0545976	digestive
531.2	Gastric ulcer	ACE2	X	15675244	chrX:15675244:A:G	G	A	A	136	16886	ADD	8511	1.32464	0.146331	0.994352	1.76464	1.92126	0.0546996	digestive
483	Acute bronchitis and bronchiolitis	TMPRSS2	21	41508701	chr21:41508701:T:G	G	T	T	470	13578	ADD	7024	1.43154	0.186745	0.992761	2.06424	1.92106	0.0547241	respiratory
1008	Crushing or internal injury to organs	ACE2	X	15675244	chrX:15675244:A:G	G	A	A	36	17628	ADD	8832	0.466162	0.397301	0.213971	1.01559	-1.92102	0.0547296	NULL
381.11	Suppurative and unspecified otitis media	DPP4	2	162073469	chr2:162073469:A:G	A	G	G	240	15516	ADD	7878	1.31191	0.141336	0.99449	1.73066	1.92087	0.054748	sense organs
556.1	Ulceration of intestine	ACE2	X	15675734	chrX:15675734:C:T	C	T	T	24	12050	ADD	6037	0.554794	0.306809	0.304071	1.01225	-1.92027	0.0548233	digestive
495.1	Chronic obstructive asthma	ACE2	X	15674316	chrX:15674316:A:C	C	A	A	244	11930	ADD	6087	0.761713	0.141748	0.576946	1.00565	-1.92021	0.0548308	respiratory
495.1	Chronic obstructive asthma	ACE2	X	15674699	chrX:15674699:T:C	C	T	T	244	11930	ADD	6087	0.761713	0.141748	0.576946	1.00565	-1.92021	0.0548308	respiratory
495.1	Chronic obstructive asthma	ACE2	X	15675338	chrX:15675338:T:A	A	T	T	244	11930	ADD	6087	0.761713	0.141748	0.576946	1.00565	-1.92021	0.0548308	respiratory
710.19	Unspecified osteomyelitis	DPP4	2	162073199	chr2:162073199:T:G	T	G	G	190	14484	ADD	7337	1.35651	0.158824	0.993643	1.85188	1.91981	0.0548817	musculoskeletal
521.1	Dental caries	DPP4	2	162073222	chr2:162073222:G:A	G	A	A	270	15118	ADD	7694	0.72122	0.170268	0.516578	1.00693	-1.91939	0.0549348	digestive
170.2	Cancer of connective tissue	DPP4	2	162073199	chr2:162073199:T:G	T	G	G	76	17588	ADD	8832	0.543606	0.317678	0.29166	1.01319	-1.91871	0.0550211	neoplasms
573.9	Abnormal serum enzyme levels	ACE2	X	15675244	chrX:15675244:A:G	G	A	A	522	14022	ADD	7272	1.16535	0.0797526	0.996712	1.36251	1.91867	0.0550265	digestive
196	Radiotherapy	LY6E	8	143018292	chr8:143018292:C:A	C	A	A	14	15350	ADD	7682	2.4301	0.462933	0.980786	6.02107	1.91806	0.055104	neoplasms
430.1	Subarachnoid hemorrhage	ACE2	X	15675734	chrX:15675734:C:T	C	T	T	68	14764	ADD	7416	0.662942	0.214399	0.435491	1.00919	-1.9173	0.0552	circulatory system
531.2	Gastric ulcer	ACE2	X	15674316	chrX:15674316:A:C	C	A	A	136	16886	ADD	8511	1.32389	0.146348	0.993758	1.76369	1.91718	0.055215	digestive
531.2	Gastric ulcer	ACE2	X	15674699	chrX:15674699:T:C	C	T	T	136	16886	ADD	8511	1.32389	0.146348	0.993758	1.76369	1.91718	0.055215	digestive
531.2	Gastric ulcer	ACE2	X	15675338	chrX:15675338:T:A	A	T	T	136	16886	ADD	8511	1.32389	0.146348	0.993758	1.76369	1.91718	0.055215	digestive
495.1	Chronic obstructive asthma	ACE2	X	15675244	chrX:15675244:A:G	G	A	A	244	11930	ADD	6087	0.76205	0.141763	0.577184	1.00613	-1.91688	0.0552531	respiratory
477	Epistaxis or throat hemorrhage	DPP4	2	162073469	chr2:162073469:A:G	A	G	G	340	10330	ADD	5335	1.26686	0.123459	0.994583	1.61368	1.91597	0.0553693	respiratory
416	Cardiomegaly	LY6E	8	143018292	chr8:143018292:C:A	C	A	A	344	14402	ADD	7373	1.34734	0.155626	0.993132	1.82787	1.91568	0.0554055	circulatory system
381.11	Suppurative and unspecified otitis media	LY6E	8	143018292	chr8:143018292:C:A	C	A	A	240	15516	ADD	7878	1.42273	0.184074	0.99183	2.04083	1.9154	0.0554418	sense organs
288.11	Neutropenia	TMPRSS2	21	41508701	chr21:41508701:T:G	G	T	T	194	13698	ADD	6946	1.6552	0.263134	0.988255	2.77223	1.91507	0.0554841	hematopoietic
010	Tuberculosis	DPP4	2	162073469	chr2:162073469:A:G	A	G	G	94	13970	ADD	7032	0.598707	0.268002	0.354071	1.01237	-1.9141	0.0556071	infectious diseases
394.4	Acute rheumatic heart disease	TMPRSS2	21	41508700	chr21:41508700:G:A	G	A	A	18	14322	ADD	7170	4.33454	0.766271	0.965366	19.4623	1.91396	0.0556247	circulatory system
348.2	Cerebral edema and compression of brain	LY6E	8	143017718	chr8:143017718:G:C	C	G	G	196	14406	ADD	7301	1.38542	0.170363	0.992128	1.93462	1.91358	0.0556743	neurological
291.1	Transient mental disorders due to conditions classified elsewhere	LY6E	8	143017718	chr8:143017718:G:C	C	G	G	26	14340	ADD	7183	2.09026	0.385297	0.98228	4.44801	1.91356	0.0556762	mental disorders
496.21	Obstructive chronic bronchitis	DPP4	2	162073222	chr2:162073222:G:A	G	A	A	454	11930	ADD	6192	1.24324	0.113785	0.994717	1.55384	1.91341	0.0556953	respiratory
401.22	Hypertensive chronic kidney disease	LY6E	8	143018261	chr8:143018261:G:A	G	A	A	2368	5666	ADD	4017	0.553622	0.309049	0.3021	1.01456	-1.9132	0.0557223	circulatory system
840.2	Rotator cuff (capsule) sprain	ACE2	X	15675734	chrX:15675734:C:T	C	T	T	146	13340	ADD	6743	0.760969	0.14281	0.575184	1.00676	-1.91278	0.0557765	injuries & poisonings
110.11	Dermatophytosis of nail	ACE2	X	15675244	chrX:15675244:A:G	G	A	A	492	12868	ADD	6680	1.16647	0.0805445	0.996124	1.36594	1.91174	0.055909	infectious diseases
840.3	Joint/ligament sprain	DPP4	2	162073469	chr2:162073469:A:G	A	G	G	344	13340	ADD	6842	1.25672	0.119551	0.994204	1.58855	1.91134	0.0559607	injuries & poisonings
512.2	Painful respiration	LY6E	8	143017718	chr8:143017718:G:C	C	G	G	270	7326	ADD	3798	1.33968	0.153025	0.992532	1.80823	1.91098	0.0560073	respiratory
280.2	Iron deficiency anemia secondary to blood loss (chronic)	ACE2	X	15674766	chrX:15674766:C:G	C	G	G	450	8724	ADD	4587	1.18421	0.0884839	0.995662	1.40847	1.91084	0.0560256	hematopoietic
1008	Crushing or internal injury to organs	ACE2	X	15674316	chrX:15674316:A:C	C	A	A	36	17628	ADD	8832	0.469969	0.395176	0.216618	1.01963	-1.91077	0.0560348	NULL
1008	Crushing or internal injury to organs	ACE2	X	15674699	chrX:15674699:T:C	C	T	T	36	17628	ADD	8832	0.469969	0.395176	0.216618	1.01963	-1.91077	0.0560348	NULL
1008	Crushing or internal injury to organs	ACE2	X	15675338	chrX:15675338:T:A	A	T	T	36	17628	ADD	8832	0.469969	0.395176	0.216618	1.01963	-1.91077	0.0560348	NULL
375	Disorders of lacrimal system	ACE2	X	15675244	chrX:15675244:A:G	G	A	A	58	14222	ADD	7140	1.55434	0.230857	0.988644	2.44372	1.91049	0.0560698	sense organs
117	Mycoses	DPP4	2	162073469	chr2:162073469:A:G	A	G	G	102	12868	ADD	6485	0.600268	0.267177	0.355569	1.01337	-1.91026	0.0560996	infectious diseases
573.9	Abnormal serum enzyme levels	ACE2	X	15674316	chrX:15674316:A:C	C	A	A	522	14022	ADD	7272	1.16455	0.0797489	0.99604	1.36158	1.91022	0.0561055	digestive
573.9	Abnormal serum enzyme levels	ACE2	X	15674699	chrX:15674699:T:C	C	T	T	522	14022	ADD	7272	1.16455	0.0797489	0.99604	1.36158	1.91022	0.0561055	digestive
573.9	Abnormal serum enzyme levels	ACE2	X	15675338	chrX:15675338:T:A	A	T	T	522	14022	ADD	7272	1.16455	0.0797489	0.99604	1.36158	1.91022	0.0561055	digestive
352.1	Trigeminal nerve disorders [CN5]	LY6E	8	143017718	chr8:143017718:G:C	C	G	G	70	14182	ADD	7126	1.64966	0.262056	0.987036	2.75714	1.91017	0.0561114	neurological
798	Malaise and fatigue	ACE2	X	15675734	chrX:15675734:C:T	C	T	T	3426	11420	ADD	7423	1.06828	0.0345783	0.998279	1.14319	1.91015	0.0561134	symptoms
375	Disorders of lacrimal system	ACE2	X	15674316	chrX:15674316:A:C	C	A	A	58	14222	ADD	7140	1.55403	0.230916	0.988335	2.44352	1.90915	0.0562426	sense organs
375	Disorders of lacrimal system	ACE2	X	15674699	chrX:15674699:T:C	C	T	T	58	14222	ADD	7140	1.55403	0.230916	0.988335	2.44352	1.90915	0.0562426	sense organs
375	Disorders of lacrimal system	ACE2	X	15675338	chrX:15675338:T:A	A	T	T	58	14222	ADD	7140	1.55403	0.230916	0.988335	2.44352	1.90915	0.0562426	sense organs
736.2	Acquired deformities of finger	DPP4	2	162073199	chr2:162073199:T:G	T	G	G	42	15480	ADD	7761	0.413563	0.462505	0.167054	1.02383	-1.90905	0.0562559	musculoskeletal
841	Sprains and strains of back and neck	DPP4	2	162074215	chr2:162074215:T:G	G	T	T	416	13340	ADD	6878	1.2181	0.103352	0.994743	1.49162	1.90897	0.0562661	injuries & poisonings
253.4	Anterior pituitary disorders	DPP4	2	162074215	chr2:162074215:T:G	G	T	T	16	14812	ADD	7414	0.358585	0.537276	0.125101	1.02783	-1.90887	0.0562788	endocrine/metabolic
441	Vascular insufficiency of intestine	DPP4	2	162073222	chr2:162073222:G:A	G	A	A	56	14400	ADD	7228	0.520721	0.342002	0.266374	1.01793	-1.908	0.0563911	circulatory system
289.1	Myelofibrosis	TMPRSS2	21	41508700	chr21:41508700:G:A	G	A	A	4	13698	ADD	6851	4.11008	0.741053	0.961758	17.5645	1.90735	0.0564758	hematopoietic
564	Functional digestive disorders	LY6E	8	143017718	chr8:143017718:G:C	C	G	G	216	12050	ADD	6133	0.684166	0.199023	0.463184	1.01058	-1.90709	0.0565087	digestive
252.2	Hypoparathyroidism	ACE2	X	15675734	chrX:15675734:C:T	C	T	T	40	14812	ADD	7426	1.6942	0.276471	0.985442	2.91271	1.90692	0.0565309	endocrine/metabolic
427.41	Ventricular fibrillation and flutter	TMPRSS2	21	41508700	chr21:41508700:G:A	G	A	A	94	8980	ADD	4537	2.53903	0.488683	0.974314	6.6166	1.90672	0.0565574	circulatory system
972.1	Cardiac rhythm regulators causing adverse effects in therapeutic use	LY6E	8	143017718	chr8:143017718:G:C	C	G	G	10	12966	ADD	6488	2.33067	0.443779	0.976644	5.56195	1.90671	0.0565581	injuries & poisonings
593.1	Gross hematuria	TMPRSS2	21	41508701	chr21:41508701:T:G	G	T	T	288	11610	ADD	5949	0.477396	0.387795	0.223248	1.02087	-1.9067	0.0565597	genitourinary
427.9	Palpitations	DPP4	2	162074215	chr2:162074215:T:G	G	T	T	1618	8980	ADD	5299	0.892803	0.0595126	0.794508	1.00326	-1.9053	0.0567415	circulatory system
198.7	Secondary malignant neoplasm of skin	LY6E	8	143018261	chr8:143018261:G:A	G	A	A	6	15350	ADD	7678	4.09454	0.739977	0.960144	17.4612	1.905	0.0567801	neoplasms
217.1	Nevus, non-neoplastic	LY6E	8	143018292	chr8:143018292:C:A	C	A	A	22	8028	ADD	4025	2.31267	0.440148	0.976021	5.47985	1.90482	0.0568032	neoplasms
250.7	Diabetic retinopathy	LY6E	8	143018292	chr8:143018292:C:A	C	A	A	916	13982	ADD	7449	1.21488	0.10219	0.99437	1.48428	1.90472	0.0568168	endocrine/metabolic
276	Disorders of fluid, electrolyte, and acid-base balance	TMPRSS2	21	41508701	chr21:41508701:T:G	G	T	T	2486	11046	ADD	6766	0.80721	0.112483	0.647502	1.00631	-1.90404	0.056905	endocrine/metabolic
415.11	Pulmonary embolism and infarction, acute	LY6E	8	143018261	chr8:143018261:G:A	G	A	A	606	14402	ADD	7504	0.328331	0.585022	0.104313	1.03344	-1.90375	0.0569433	circulatory system
402	Elevated blood pressure reading without diagnosis of hypertension	LY6E	8	143018292	chr8:143018292:C:A	C	A	A	286	16892	ADD	8589	1.37836	0.168564	0.990557	1.91797	1.90368	0.0569523	circulatory system
626.1	Irregular menstrual cycle/bleeding	ACE2	X	15675734	chrX:15675734:C:T	C	T	T	1306	12686	ADD	6996	1.12804	0.0632965	0.996427	1.27703	1.90341	0.0569868	genitourinary
110.11	Dermatophytosis of nail	ACE2	X	15674316	chrX:15674316:A:C	C	A	A	492	12868	ADD	6680	1.16564	0.0805419	0.995418	1.36496	1.90294	0.0570482	infectious diseases
110.11	Dermatophytosis of nail	ACE2	X	15674699	chrX:15674699:T:C	C	T	T	492	12868	ADD	6680	1.16564	0.0805419	0.995418	1.36496	1.90294	0.0570482	infectious diseases
110.11	Dermatophytosis of nail	ACE2	X	15675338	chrX:15675338:T:A	A	T	T	492	12868	ADD	6680	1.16564	0.0805419	0.995418	1.36496	1.90294	0.0570482	infectious diseases
611.11	Mammographic microcalcification	LY6E	8	143017718	chr8:143017718:G:C	C	G	G	44	14402	ADD	7223	1.82348	0.315817	0.981924	3.3863	1.9022	0.0571444	genitourinary
759	Other and unspecified congenital anomalies	ACE2	X	15674766	chrX:15674766:C:G	C	G	G	60	17180	ADD	8620	0.656345	0.221386	0.425293	1.01292	-1.90197	0.0571756	congenital anomalies
743.1	Osteoporosis	TMPRSS2	21	41508701	chr21:41508701:T:G	G	T	T	366	15886	ADD	8126	1.48441	0.207723	0.987961	2.23032	1.90165	0.0572165	musculoskeletal
614.54	Abscess or ulceration of vulva	TMPRSS2	21	41508700	chr21:41508700:G:A	G	A	A	46	14548	ADD	7297	3.25496	0.620745	0.964199	10.9882	1.90123	0.0572716	genitourinary
614.31	Acute inflammatory pelvic disease	LY6E	8	143018261	chr8:143018261:G:A	G	A	A	14	14548	ADD	7281	4.36172	0.775066	0.954818	19.9249	1.90031	0.0573923	genitourinary
433.21	Cerebral artery occlusion, with cerebral infarction	DPP4	2	162073469	chr2:162073469:A:G	A	G	G	896	14764	ADD	7830	1.16082	0.0784936	0.995292	1.35387	1.89984	0.0574542	circulatory system
367.2	Astigmatism	LY6E	8	143017718	chr8:143017718:G:C	C	G	G	572	14070	ADD	7321	0.797026	0.119435	0.63068	1.00725	-1.89951	0.0574976	sense organs
508	Pulmonary collapse; interstitial and compensatory emphysema	TMPRSS2	21	41508701	chr21:41508701:T:G	G	T	T	200	14020	ADD	7110	1.66228	0.267566	0.983901	2.80838	1.89931	0.0575242	respiratory
614.33	Pelvic inflammatory disease, NOS	TMPRSS2	21	41508700	chr21:41508700:G:A	G	A	A	44	14548	ADD	7296	3.18848	0.610517	0.96363	10.5501	1.89928	0.0575276	genitourinary
726.1	Enthesopathy	DPP4	2	162074215	chr2:162074215:T:G	G	T	T	910	11508	ADD	6209	1.14838	0.0728648	0.995546	1.32467	1.89869	0.0576047	musculoskeletal
420.2	Pericarditis	DPP4	2	162073199	chr2:162073199:T:G	T	G	G	280	14744	ADD	7512	1.29664	0.136883	0.991523	1.69564	1.89777	0.0577261	circulatory system
289.5	Diseases of spleen	TMPRSS2	21	41508700	chr21:41508700:G:A	G	A	A	36	13698	ADD	6867	3.07894	0.592623	0.963742	9.83656	1.89764	0.057743	hematopoietic
626.12	Excessive or frequent menstruation	ACE2	X	15674766	chrX:15674766:C:G	C	G	G	794	12686	ADD	6740	1.1559	0.0763619	0.995225	1.34252	1.89728	0.0577904	genitourinary
302	Sexual and gender identity disorders	DPP4	2	162073469	chr2:162073469:A:G	A	G	G	68	7042	ADD	3555	1.60994	0.251012	0.984345	2.63313	1.8971	0.0578142	mental disorders
159.4	Malignant neoplasm of retroperitoneum and peritoneum	TMPRSS2	21	41508700	chr21:41508700:G:A	G	A	A	18	16170	ADD	8094	4.3589	0.776049	0.952364	19.9504	1.89707	0.0578185	neoplasms
916	NA	ACE2	X	15674766	chrX:15674766:C:G	C	G	G	840	15362	ADD	8101	1.12878	0.0638764	0.995954	1.27933	1.89649	0.0578949	NA
374.6	Dermatochalasis	DPP4	2	162073199	chr2:162073199:T:G	T	G	G	50	14556	ADD	7303	1.62214	0.255204	0.983687	2.67496	1.89552	0.058024	sense organs
433.1	Occlusion and stenosis of precerebral arteries	ACE2	X	15674766	chrX:15674766:C:G	C	G	G	302	14764	ADD	7533	0.854602	0.0829043	0.726433	1.00538	-1.89519	0.0580671	circulatory system
760	Back pain	DPP4	2	162074215	chr2:162074215:T:G	G	T	T	4894	10326	ADD	7610	1.07318	0.0372774	0.997568	1.15453	1.89464	0.0581401	symptoms
386	Vertiginous syndromes and other disorders of vestibular system	LY6E	8	143018261	chr8:143018261:G:A	G	A	A	100	12818	ADD	6459	2.82253	0.547707	0.964783	8.25748	1.89451	0.0581579	sense organs
276.6	Fluid overload	LY6E	8	143018261	chr8:143018261:G:A	G	A	A	538	11046	ADD	5792	0.255562	0.720285	0.0622859	1.04859	-1.8941	0.0582122	endocrine/metabolic
711	Arthropathy associated with infections	TMPRSS2	21	41508700	chr21:41508700:G:A	G	A	A	38	14484	ADD	7261	3.14799	0.60547	0.960852	10.3136	1.89401	0.058224	musculoskeletal
425.8	Other cardiomyopathy	LY6E	8	143018261	chr8:143018261:G:A	G	A	A	56	14744	ADD	7400	3.50095	0.661585	0.957291	12.8035	1.89399	0.0582265	circulatory system
760	Back pain	DPP4	2	162073199	chr2:162073199:T:G	T	G	G	4894	10326	ADD	7610	0.922733	0.0424727	0.84903	1.00283	-1.89335	0.0583115	symptoms
963	Poisoning by primarily systemic agents	TMPRSS2	21	41508701	chr21:41508701:T:G	G	T	T	310	12966	ADD	6638	1.53928	0.227836	0.984876	2.40575	1.89308	0.0583477	injuries & poisonings
686	Other local infections of skin and subcutaneous tissue	TMPRSS2	21	41508701	chr21:41508701:T:G	G	T	T	138	13750	ADD	6944	1.77829	0.304148	0.979742	3.22772	1.89268	0.058401	dermatologic
010	Tuberculosis	DPP4	2	162073199	chr2:162073199:T:G	T	G	G	94	13970	ADD	7032	0.585109	0.283238	0.335849	1.01936	-1.89225	0.0584574	infectious diseases
174	Breast cancer	LY6E	8	143018261	chr8:143018261:G:A	G	A	A	470	14054	ADD	7262	0.256284	0.719578	0.0625483	1.05009	-1.89204	0.0584859	neoplasms
213	Benign neoplasm of bone and articular cartilage	LY6E	8	143018292	chr8:143018292:C:A	C	A	A	34	7060	ADD	3547	2.08581	0.388584	0.973891	4.46722	1.89188	0.0585068	neoplasms
651	Multiple gestation	LY6E	8	143018261	chr8:143018261:G:A	G	A	A	38	17674	ADD	8856	3.09281	0.596906	0.95999	9.96417	1.89156	0.0585501	pregnancy complications
195.3	NA	DPP4	2	162073469	chr2:162073469:A:G	A	G	G	32	15350	ADD	7691	1.72398	0.287943	0.980472	3.0313	1.89147	0.0585612	NA
604.3	Peyronie's disease	TMPRSS2	21	41508700	chr21:41508700:G:A	G	A	A	18	14468	ADD	7243	4.44067	0.788437	0.946955	20.8242	1.89084	0.0586463	genitourinary
229	Benign neoplasm of unspecified sites	ACE2	X	15674766	chrX:15674766:C:G	C	G	G	56	17594	ADD	8825	1.56597	0.237204	0.983725	2.49282	1.89079	0.0586527	neoplasms
562.2	Diverticulitis	ACE2	X	15674316	chrX:15674316:A:C	C	A	A	252	12050	ADD	6151	0.778571	0.132409	0.600608	1.00926	-1.89032	0.0587158	digestive
562.2	Diverticulitis	ACE2	X	15674699	chrX:15674699:T:C	C	T	T	252	12050	ADD	6151	0.778571	0.132409	0.600608	1.00926	-1.89032	0.0587158	digestive
562.2	Diverticulitis	ACE2	X	15675338	chrX:15675338:T:A	A	T	T	252	12050	ADD	6151	0.778571	0.132409	0.600608	1.00926	-1.89032	0.0587158	digestive
250.12	Type 1 diabetes with renal manifestations	DPP4	2	162073469	chr2:162073469:A:G	A	G	G	112	9124	ADD	4618	0.635835	0.239587	0.397565	1.01691	-1.88998	0.0587604	endocrine/metabolic
535.2	Atrophic gastritis	LY6E	8	143018261	chr8:143018261:G:A	G	A	A	142	14340	ADD	7241	2.4519	0.474735	0.966956	6.21723	1.88918	0.0588673	digestive
705.1	Dyshidrosis	ACE2	X	15675734	chrX:15675734:C:T	C	T	T	38	14256	ADD	7147	1.75883	0.29895	0.97894	3.16002	1.88876	0.0589234	dermatologic
721.2	Spondylosis with myelopathy	LY6E	8	143018292	chr8:143018292:C:A	C	A	A	198	13702	ADD	6950	1.44953	0.19657	0.986068	2.13083	1.88859	0.0589468	musculoskeletal
575.1	Cholangitis	TMPRSS2	21	41508701	chr21:41508701:T:G	G	T	T	42	16340	ADD	8191	2.4277	0.469651	0.967003	6.09486	1.88852	0.0589562	digestive
555	Inflammatory bowel disease and other gastroenteritis and colitis	LY6E	8	143018292	chr8:143018292:C:A	C	A	A	116	12050	ADD	6083	1.58788	0.244852	0.982654	2.56588	1.8885	0.0589588	digestive
512.8	Cough	ACE2	X	15674766	chrX:15674766:C:G	C	G	G	3462	7326	ADD	5394	1.0735	0.0375721	0.997286	1.15553	1.88764	0.0590741	respiratory
499	Cystic fibrosis	TMPRSS2	21	41508700	chr21:41508700:G:A	G	A	A	2	17732	ADD	8867	3.86035	0.715797	0.94916	15.7005	1.88707	0.0591509	respiratory
562.2	Diverticulitis	ACE2	X	15675244	chrX:15675244:A:G	G	A	A	252	12050	ADD	6151	0.778995	0.132428	0.600914	1.00985	-1.88594	0.0593034	digestive
528.7	Sialolithiasis	DPP4	2	162073222	chr2:162073222:G:A	G	A	A	16	16206	ADD	8111	1.9361	0.350429	0.974186	3.84781	1.88533	0.0593849	digestive
562	Diverticulosis and diverticulitis	ACE2	X	15675734	chrX:15675734:C:T	C	T	T	502	12050	ADD	6276	1.16266	0.0800287	0.993876	1.36011	1.8832	0.0596732	digestive
557.1	Celiac disease	LY6E	8	143018261	chr8:143018261:G:A	G	A	A	26	12050	ADD	6038	4.12897	0.753039	0.943743	18.0647	1.88307	0.0596905	digestive
296.1	Bipolar	LY6E	8	143018292	chr8:143018292:C:A	C	A	A	564	7042	ADD	3803	0.749652	0.153027	0.555396	1.01185	-1.88298	0.0597033	mental disorders
444.1	Arterial embolism and thrombosis of lower extremity artery	DPP4	2	162073222	chr2:162073222:G:A	G	A	A	166	14400	ADD	7283	1.37295	0.168334	0.987116	1.90959	1.88293	0.0597101	circulatory system
969	Poisoning by psychotropic agents	TMPRSS2	21	41508700	chr21:41508700:G:A	G	A	A	82	12966	ADD	6524	2.76081	0.539839	0.958351	7.95333	1.88116	0.05995	injuries & poisonings
560.1	Paralytic ileus	LY6E	8	143018292	chr8:143018292:C:A	C	A	A	80	12050	ADD	6065	1.67264	0.273452	0.978677	2.85868	1.88114	0.0599524	digestive
316	Substance addiction and disorders	LY6E	8	143018261	chr8:143018261:G:A	G	A	A	1280	10372	ADD	5826	1.51414	0.220706	0.982428	2.33363	1.87964	0.0601573	mental disorders
289.9	Abnormality of red blood cells	DPP4	2	162073222	chr2:162073222:G:A	G	A	A	48	13698	ADD	6873	1.67827	0.275475	0.978085	2.87969	1.87953	0.0601728	hematopoietic
250.42	Other abnormal glucose	ACE2	X	15675734	chrX:15675734:C:T	C	T	T	2348	9124	ADD	5736	1.08034	0.0411235	0.996679	1.17102	1.87906	0.0602361	endocrine/metabolic
272.9	Unspecified disorder of lipoid metabolism	ACE2	X	15675734	chrX:15675734:C:T	C	T	T	62	8752	ADD	4407	0.662404	0.219243	0.431025	1.01799	-1.87865	0.0602929	endocrine/metabolic
117	Mycoses	DPP4	2	162073199	chr2:162073199:T:G	T	G	G	102	12868	ADD	6485	0.590503	0.28046	0.340796	1.02318	-1.87827	0.0603439	infectious diseases
401.1	Essential hypertension	DPP4	2	162073199	chr2:162073199:T:G	T	G	G	10554	5666	ADD	8110	0.914912	0.0473568	0.833813	1.0039	-1.87783	0.060405	circulatory system
579	Other symptoms involving abdomen and pelvis	DPP4	2	162073222	chr2:162073222:G:A	G	A	A	324	14128	ADD	7226	0.754367	0.150116	0.562088	1.01242	-1.87772	0.0604189	digestive
715	Other inflammatory spondylopathies	DPP4	2	162074215	chr2:162074215:T:G	G	T	T	102	14934	ADD	7518	1.43751	0.193278	0.984222	2.09957	1.87768	0.0604248	musculoskeletal
348.9	Other conditions of brain, NOS	TMPRSS2	21	41508700	chr21:41508700:G:A	G	A	A	74	14406	ADD	7240	2.71953	0.532827	0.957086	7.72746	1.87764	0.0604298	neurological
733	Other disorders of bone and cartilage	LY6E	8	143017718	chr8:143017718:G:C	C	G	G	592	14128	ADD	7360	1.22339	0.107386	0.991191	1.50998	1.87756	0.0604407	musculoskeletal
474	Acute and chronic tonsillitis	TMPRSS2	21	41508701	chr21:41508701:T:G	G	T	T	136	10330	ADD	5233	1.78011	0.307341	0.974624	3.25129	1.87633	0.0606098	respiratory
285	Other anemias	DPP4	2	162073469	chr2:162073469:A:G	A	G	G	4794	8724	ADD	6759	0.922864	0.0428022	0.848602	1.00362	-1.87546	0.0607294	hematopoietic
509.8	Dependence on respirator [Ventilator] or supplemental oxygen	DPP4	2	162073222	chr2:162073222:G:A	G	A	A	452	14020	ADD	7236	1.23717	0.113543	0.990337	1.54553	1.87445	0.0608689	respiratory
246	Other disorders of thyroid	TMPRSS2	21	41508701	chr21:41508701:T:G	G	T	T	210	14014	ADD	7112	1.58941	0.247214	0.979053	2.58026	1.87433	0.0608849	endocrine/metabolic
250	Diabetes mellitus	ACE2	X	15675244	chrX:15675244:A:G	G	A	A	4350	9124	ADD	6737	0.93365	0.0366368	0.868958	1.00316	-1.8739	0.0609439	endocrine/metabolic
611.11	Mammographic microcalcification	DPP4	2	162074215	chr2:162074215:T:G	G	T	T	44	14402	ADD	7223	1.68932	0.279807	0.976203	2.92337	1.87389	0.0609457	genitourinary
159	Malignant neoplasm of other and ill-defined sites within the digestive organs and peritoneum	TMPRSS2	21	41508700	chr21:41508700:G:A	G	A	A	56	16170	ADD	8113	2.75514	0.540842	0.954506	7.9526	1.87387	0.060948	neoplasms
620.1	Dysplasia of cervix	ACE2	X	15674766	chrX:15674766:C:G	C	G	G	22	16764	ADD	8393	0.4816	0.389918	0.224278	1.03415	-1.87383	0.0609534	genitourinary
634	Miscarriage; stillbirth	ACE2	X	15674766	chrX:15674766:C:G	C	G	G	346	16082	ADD	8214	0.85706	0.0823203	0.729357	1.00712	-1.87375	0.0609645	pregnancy complications
350	Abnormal movement	LY6E	8	143018261	chr8:143018261:G:A	G	A	A	498	14758	ADD	7628	1.81991	0.319675	0.972617	3.40531	1.87311	0.0610533	neurological
259	Other endocrine disorders	ACE2	X	15674766	chrX:15674766:C:G	C	G	G	68	14812	ADD	7440	0.669325	0.214399	0.439684	1.0189	-1.87261	0.0611219	endocrine/metabolic
740.2	Osteoarthrosis, generalized	ACE2	X	15674766	chrX:15674766:C:G	C	G	G	814	11812	ADD	6313	1.13976	0.0698629	0.993907	1.30701	1.87248	0.0611406	musculoskeletal
070.4	Chronic hepatitis	ACE2	X	15675244	chrX:15675244:A:G	G	A	A	106	12338	ADD	6222	1.35747	0.163245	0.985767	1.86932	1.87215	0.0611857	infectious diseases
204	Leukemia	DPP4	2	162074215	chr2:162074215:T:G	G	T	T	80	17048	ADD	8564	0.626749	0.249566	0.384293	1.02217	-1.87208	0.061195	neoplasms
696.41	Psoriasis vulgaris	DPP4	2	162073222	chr2:162073222:G:A	G	A	A	144	13140	ADD	6642	1.42345	0.188632	0.983511	2.06019	1.87182	0.0612312	dermatologic
733.2	Cyst of bone	LY6E	8	143017718	chr8:143017718:G:C	C	G	G	10	14128	ADD	7069	2.2128	0.424358	0.963227	5.08343	1.87168	0.0612515	musculoskeletal
279.11	Deficiency of humoral immunity	ACE2	X	15674766	chrX:15674766:C:G	C	G	G	28	15946	ADD	7987	0.552525	0.316977	0.296852	1.0284	-1.87161	0.0612608	endocrine/metabolic
610.4	Benign neoplasm of breast	DPP4	2	162074215	chr2:162074215:T:G	G	T	T	52	14402	ADD	7227	0.556868	0.312843	0.30162	1.02812	-1.87131	0.0613014	genitourinary
200	Myeloproliferative disease	DPP4	2	162073222	chr2:162073222:G:A	G	A	A	134	17048	ADD	8591	0.638719	0.239616	0.399345	1.02158	-1.87088	0.0613622	neoplasms
701.2	Scar conditions and fibrosis of skin	DPP4	2	162073469	chr2:162073469:A:G	A	G	G	128	15778	ADD	7953	1.41684	0.186281	0.983464	2.04119	1.87045	0.0614213	dermatologic
478	Throat pain	TMPRSS2	21	41508701	chr21:41508701:T:G	G	T	T	318	10330	ADD	5324	0.50737	0.362761	0.249197	1.03302	-1.87042	0.0614256	respiratory
312.3	Impulse control disorder	LY6E	8	143018261	chr8:143018261:G:A	G	A	A	12	17146	ADD	8579	3.99155	0.740073	0.935815	17.0252	1.87033	0.0614383	mental disorders
736.2	Acquired deformities of finger	DPP4	2	162073469	chr2:162073469:A:G	A	G	G	42	15480	ADD	7761	0.451853	0.424813	0.196515	1.03896	-1.87	0.0614845	musculoskeletal
564	Functional digestive disorders	TMPRSS2	21	41508700	chr21:41508700:G:A	G	A	A	216	12050	ADD	6133	1.93693	0.353652	0.968468	3.87385	1.86937	0.0615718	digestive
803	Fracture of upper limb	DPP4	2	162073222	chr2:162073222:G:A	G	A	A	136	15624	ADD	7880	0.639617	0.239108	0.400305	1.022	-1.86897	0.0616273	injuries & poisonings
871.4	Open wound of toe(s)	TMPRSS2	21	41508701	chr21:41508701:T:G	G	T	T	12	15452	ADD	7732	3.07028	0.600226	0.946816	9.95615	1.86891	0.0616347	injuries & poisonings
070.4	Chronic hepatitis	ACE2	X	15674316	chrX:15674316:A:C	C	A	A	106	12338	ADD	6222	1.35668	0.163246	0.985196	1.86824	1.8686	0.0616782	infectious diseases
070.4	Chronic hepatitis	ACE2	X	15674699	chrX:15674699:T:C	C	T	T	106	12338	ADD	6222	1.35668	0.163246	0.985196	1.86824	1.8686	0.0616782	infectious diseases
070.4	Chronic hepatitis	ACE2	X	15675338	chrX:15675338:T:A	A	T	T	106	12338	ADD	6222	1.35668	0.163246	0.985196	1.86824	1.8686	0.0616782	infectious diseases
710.11	Acute osteomyelitis	LY6E	8	143017718	chr8:143017718:G:C	C	G	G	102	14484	ADD	7293	0.581885	0.289819	0.329718	1.02691	-1.86835	0.0617135	musculoskeletal
619.4	Noninflammatory disorders of vagina	LY6E	8	143017718	chr8:143017718:G:C	C	G	G	892	14484	ADD	7688	1.18729	0.0919212	0.991545	1.42167	1.8676	0.0618183	genitourinary
965	Poisoning by analgesics, antipyretics, and antirheumatics	LY6E	8	143017718	chr8:143017718:G:C	C	G	G	150	12966	ADD	6558	1.43406	0.193108	0.982183	2.09382	1.86687	0.0619199	injuries & poisonings
241.1	Nontoxic uninodular goiter	LY6E	8	143017718	chr8:143017718:G:C	C	G	G	768	14014	ADD	7391	1.19288	0.0944793	0.991237	1.43555	1.8668	0.0619294	endocrine/metabolic
681.5	Cellulitis and abscess of leg, except foot	ACE2	X	15675244	chrX:15675244:A:G	G	A	A	374	13750	ADD	7062	1.19788	0.0967357	0.990996	1.44796	1.86647	0.061976	dermatologic
555	Inflammatory bowel disease and other gastroenteritis and colitis	ACE2	X	15675244	chrX:15675244:A:G	G	A	A	116	12050	ADD	6083	1.35592	0.163135	0.984854	1.86678	1.86641	0.0619835	digestive
253.2	Pituitary hypofunction	ACE2	X	15674316	chrX:15674316:A:C	C	A	A	52	14812	ADD	7432	1.41684	0.186782	0.982501	2.0432	1.86545	0.062119	endocrine/metabolic
253.2	Pituitary hypofunction	ACE2	X	15674699	chrX:15674699:T:C	C	T	T	52	14812	ADD	7432	1.41684	0.186782	0.982501	2.0432	1.86545	0.062119	endocrine/metabolic
253.2	Pituitary hypofunction	ACE2	X	15675244	chrX:15675244:A:G	G	A	A	52	14812	ADD	7432	1.41684	0.186782	0.982501	2.0432	1.86545	0.062119	endocrine/metabolic
253.2	Pituitary hypofunction	ACE2	X	15675338	chrX:15675338:T:A	A	T	T	52	14812	ADD	7432	1.41684	0.186782	0.982501	2.0432	1.86545	0.062119	endocrine/metabolic
496.1	Emphysema	LY6E	8	143018261	chr8:143018261:G:A	G	A	A	578	11930	ADD	6254	0.26012	0.722074	0.0631747	1.07104	-1.86492	0.0621922	respiratory
603.2	Spermatocele	LY6E	8	143017718	chr8:143017718:G:C	C	G	G	18	14468	ADD	7243	1.88079	0.338737	0.968293	3.6532	1.86484	0.0622034	genitourinary
452	Other venous embolism and thrombosis	TMPRSS2	21	41508700	chr21:41508700:G:A	G	A	A	1244	11138	ADD	6191	1.45297	0.200346	0.981122	2.15175	1.86484	0.0622045	circulatory system
272.13	Mixed hyperlipidemia	ACE2	X	15675734	chrX:15675734:C:T	C	T	T	2942	8752	ADD	5847	1.07856	0.0405571	0.996146	1.1678	1.86476	0.0622148	endocrine/metabolic
295.3	Psychosis	DPP4	2	162073469	chr2:162073469:A:G	A	G	G	82	7042	ADD	3562	1.534	0.229454	0.978391	2.40512	1.86476	0.0622155	mental disorders
195.3	NA	DPP4	2	162073199	chr2:162073199:T:G	T	G	G	32	15350	ADD	7691	1.71945	0.290762	0.972505	3.04009	1.86408	0.0623107	NA
555	Inflammatory bowel disease and other gastroenteritis and colitis	ACE2	X	15674316	chrX:15674316:A:C	C	A	A	116	12050	ADD	6083	1.35538	0.163147	0.984441	1.86608	1.86385	0.062343	digestive
555	Inflammatory bowel disease and other gastroenteritis and colitis	ACE2	X	15674699	chrX:15674699:T:C	C	T	T	116	12050	ADD	6083	1.35538	0.163147	0.984441	1.86608	1.86385	0.062343	digestive
555	Inflammatory bowel disease and other gastroenteritis and colitis	ACE2	X	15675338	chrX:15675338:T:A	A	T	T	116	12050	ADD	6083	1.35538	0.163147	0.984441	1.86608	1.86385	0.062343	digestive
275.1	Disorders of iron metabolism	LY6E	8	143017718	chr8:143017718:G:C	C	G	G	48	14386	ADD	7217	1.78334	0.310504	0.970361	3.27746	1.86307	0.0624528	hematopoietic
323.2	Acute (transverse) myelitis	DPP4	2	162073199	chr2:162073199:T:G	T	G	G	6	17284	ADD	8645	2.36382	0.461778	0.956199	5.84361	1.86297	0.0624664	neurological
327.41	Organic or persistent insomnia	DPP4	2	162073222	chr2:162073222:G:A	G	A	A	188	10772	ADD	5480	1.35302	0.162372	0.984225	1.86002	1.86204	0.0625978	neurological
229	Benign neoplasm of unspecified sites	DPP4	2	162073199	chr2:162073199:T:G	T	G	G	56	17594	ADD	8825	1.64345	0.266807	0.974203	2.77244	1.86201	0.0626023	neoplasms
870.6	Open wound of neck	LY6E	8	143018292	chr8:143018292:C:A	C	A	A	8	15452	ADD	7730	2.60114	0.513502	0.95076	7.11636	1.86163	0.0626549	injuries & poisonings
681.5	Cellulitis and abscess of leg, except foot	ACE2	X	15674316	chrX:15674316:A:C	C	A	A	374	13750	ADD	7062	1.19728	0.0967325	0.990508	1.44722	1.86137	0.0626914	dermatologic
681.5	Cellulitis and abscess of leg, except foot	ACE2	X	15674699	chrX:15674699:T:C	C	T	T	374	13750	ADD	7062	1.19728	0.0967325	0.990508	1.44722	1.86137	0.0626914	dermatologic
681.5	Cellulitis and abscess of leg, except foot	ACE2	X	15675338	chrX:15675338:T:A	A	T	T	374	13750	ADD	7062	1.19728	0.0967325	0.990508	1.44722	1.86137	0.0626914	dermatologic
334.21	Amyotrophic Lateral Sclerosis	ACE2	X	15675244	chrX:15675244:A:G	G	A	A	8	14406	ADD	7207	2.12723	0.405578	0.960695	4.71023	1.8611	0.0627304	neurological
647.3	Major puerperal infection	LY6E	8	143018261	chr8:143018261:G:A	G	A	A	8	16808	ADD	8408	3.86339	0.726444	0.930289	16.0442	1.86049	0.0628157	pregnancy complications
555.2	Ulcerative colitis	TMPRSS2	21	41508701	chr21:41508701:T:G	G	T	T	70	12050	ADD	6060	2.07772	0.39306	0.961645	4.48911	1.86046	0.0628201	digestive
334.21	Amyotrophic Lateral Sclerosis	ACE2	X	15674316	chrX:15674316:A:C	C	A	A	8	14406	ADD	7207	2.12447	0.405309	0.959956	4.70165	1.85913	0.0630083	neurological
334.21	Amyotrophic Lateral Sclerosis	ACE2	X	15674699	chrX:15674699:T:C	C	T	T	8	14406	ADD	7207	2.12447	0.405309	0.959956	4.70165	1.85913	0.0630083	neurological
334.21	Amyotrophic Lateral Sclerosis	ACE2	X	15675338	chrX:15675338:T:A	A	T	T	8	14406	ADD	7207	2.12447	0.405309	0.959956	4.70165	1.85913	0.0630083	neurological
512.2	Painful respiration	TMPRSS2	21	41508700	chr21:41508700:G:A	G	A	A	270	7326	ADD	3798	1.91934	0.350764	0.96512	3.81701	1.85875	0.063063	respiratory
444	Arterial embolism and thrombosis	DPP4	2	162073199	chr2:162073199:T:G	T	G	G	126	14400	ADD	7263	1.43075	0.192719	0.980667	2.08741	1.85867	0.0630746	circulatory system
609	Male infertility and abnormal spermatozoa	DPP4	2	162074215	chr2:162074215:T:G	G	T	T	56	14468	ADD	7262	1.56945	0.242554	0.975626	2.5247	1.85823	0.0631361	genitourinary
709.4	Polymyositis	LY6E	8	143018261	chr8:143018261:G:A	G	A	A	20	13458	ADD	6739	4.18756	0.770817	0.924357	18.9706	1.85792	0.0631803	dermatologic
218	Benign neoplasm of uterus	ACE2	X	15674766	chrX:15674766:C:G	C	G	G	750	15076	ADD	7913	1.15316	0.0767508	0.992106	1.34035	1.8567	0.0633533	neoplasms
646	Other complications of pregnancy NEC	TMPRSS2	21	41508701	chr21:41508701:T:G	G	T	T	872	16424	ADD	8648	0.674836	0.211829	0.445542	1.02213	-1.85661	0.0633662	pregnancy complications
277.7	Dysmetabolic syndrome X	TMPRSS2	21	41508700	chr21:41508700:G:A	G	A	A	126	16250	ADD	8188	2.22001	0.429737	0.956228	5.15404	1.85581	0.0634805	endocrine/metabolic
338.2	NA	ACE2	X	15674766	chrX:15674766:C:G	C	G	G	1668	13512	ADD	7590	1.08806	0.0454797	0.995269	1.1895	1.85568	0.0634986	NA
612	Breast conditions, congenital or relating to hormones	DPP4	2	162073469	chr2:162073469:A:G	A	G	G	108	14402	ADD	7255	0.61964	0.257937	0.373752	1.0273	-1.85556	0.0635169	genitourinary
512.7	Shortness of breath	ACE2	X	15674766	chrX:15674766:C:G	C	G	G	4280	7326	ADD	5803	1.06572	0.0343227	0.996386	1.13988	1.85448	0.0636712	respiratory
250.3	Insulin pump user	LY6E	8	143017718	chr8:143017718:G:C	C	G	G	1524	9124	ADD	5324	1.14404	0.0725678	0.992363	1.3189	1.85432	0.0636927	endocrine/metabolic
803.1	Fracture of humerus	DPP4	2	162073222	chr2:162073222:G:A	G	A	A	78	15624	ADD	7851	0.540251	0.332055	0.281806	1.03572	-1.85428	0.0636996	injuries & poisonings
338.2	NA	ACE2	X	15675734	chrX:15675734:C:T	C	T	T	1668	13512	ADD	7590	1.08794	0.045457	0.995207	1.18932	1.85427	0.0637012	NA
279.1	Immunity deficiency	LY6E	8	143018292	chr8:143018292:C:A	C	A	A	40	15946	ADD	7993	1.96975	0.365638	0.962009	4.03314	1.85404	0.0637339	endocrine/metabolic
596	Other disorders of bladder	LY6E	8	143018292	chr8:143018292:C:A	C	A	A	434	16060	ADD	8247	1.29728	0.1404	0.985199	1.70821	1.85376	0.0637736	genitourinary
619.1	Noninflammatory disorders of ovary, fallopian tube, and broad ligament	DPP4	2	162073469	chr2:162073469:A:G	A	G	G	68	14484	ADD	7276	1.56743	0.242493	0.974489	2.52115	1.8534	0.0638253	genitourinary
614.5	Inflammatory disease of cervix, vagina, and vulva	DPP4	2	162073222	chr2:162073222:G:A	G	A	A	1006	14548	ADD	7777	0.850165	0.0876097	0.716028	1.00943	-1.85281	0.063909	genitourinary
389.2	Conductive hearing loss	DPP4	2	162074215	chr2:162074215:T:G	G	T	T	102	15556	ADD	7829	0.663544	0.22138	0.429963	1.02402	-1.85274	0.0639199	sense organs
189.1	Cancer of kidney and renal pelvis	TMPRSS2	21	41508701	chr21:41508701:T:G	G	T	T	256	17146	ADD	8701	0.487135	0.388279	0.227586	1.04269	-1.85231	0.0639815	neoplasms
529	Diseases and other conditions of the tongue	DPP4	2	162073199	chr2:162073199:T:G	T	G	G	52	16206	ADD	8129	1.67564	0.278691	0.970419	2.89336	1.85222	0.0639945	digestive
603.1	Hydrocele	DPP4	2	162074215	chr2:162074215:T:G	G	T	T	62	14468	ADD	7265	0.588506	0.286288	0.335786	1.03143	-1.85187	0.0640447	genitourinary
528.12	Oral aphthae	TMPRSS2	21	41508701	chr21:41508701:T:G	G	T	T	8	16206	ADD	8107	2.88392	0.572322	0.939339	8.85412	1.85062	0.064224	digestive
800.4	Fracture of patella	DPP4	2	162073469	chr2:162073469:A:G	A	G	G	22	15624	ADD	7823	0.43462	0.450292	0.179813	1.05051	-1.85054	0.0642357	injuries & poisonings
523.1	Gingivitis	ACE2	X	15674316	chrX:15674316:A:C	C	A	A	26	15118	ADD	7572	0.433598	0.451819	0.178854	1.05118	-1.8495	0.0643859	digestive
523.1	Gingivitis	ACE2	X	15674699	chrX:15674699:T:C	C	T	T	26	15118	ADD	7572	0.433598	0.451819	0.178854	1.05118	-1.8495	0.0643859	digestive
523.1	Gingivitis	ACE2	X	15675338	chrX:15675338:T:A	A	T	T	26	15118	ADD	7572	0.433598	0.451819	0.178854	1.05118	-1.8495	0.0643859	digestive
257	Testicular dysfunction	LY6E	8	143018292	chr8:143018292:C:A	C	A	A	172	14812	ADD	7492	0.645484	0.236709	0.405881	1.02653	-1.84934	0.0644094	endocrine/metabolic
530.13	Barrett's esophagus	LY6E	8	143017718	chr8:143017718:G:C	C	G	G	70	9678	ADD	4874	0.498282	0.376843	0.238071	1.04291	-1.84848	0.0645323	digestive
038.3	Bacteremia	LY6E	8	143018292	chr8:143018292:C:A	C	A	A	278	13970	ADD	7124	1.37531	0.172431	0.980901	1.92829	1.84813	0.0645833	infectious diseases
523.1	Gingivitis	ACE2	X	15675244	chrX:15675244:A:G	G	A	A	26	15118	ADD	7572	0.433981	0.451762	0.179032	1.05199	-1.84777	0.064635	digestive
626	Disorders of menstruation and other abnormal bleeding from female genital tract	LY6E	8	143017718	chr8:143017718:G:C	C	G	G	1938	12686	ADD	7312	1.13727	0.069623	0.992199	1.30354	1.84748	0.0646774	genitourinary
250.11	Type 1 diabetes with ketoacidosis	DPP4	2	162073222	chr2:162073222:G:A	G	A	A	54	9124	ADD	4589	0.523922	0.349892	0.263899	1.04015	-1.84746	0.0646808	endocrine/metabolic
624	Symptoms involving female genital tract	TMPRSS2	21	41508700	chr21:41508700:G:A	G	A	A	386	14668	ADD	7527	1.78075	0.312355	0.965442	3.28458	1.84737	0.0646937	genitourinary
562.1	Diverticulosis	DPP4	2	162073469	chr2:162073469:A:G	A	G	G	794	12050	ADD	6422	1.17075	0.0853366	0.990433	1.38389	1.84731	0.0647017	digestive
585.3	Chronic renal failure [CKD]	LY6E	8	143018292	chr8:143018292:C:A	C	A	A	2990	10540	ADD	6765	1.13739	0.0697068	0.992144	1.3039	1.84682	0.0647733	genitourinary
661	Fetal distress and abnormal forces of labor	TMPRSS2	21	41508701	chr21:41508701:T:G	G	T	T	18	17600	ADD	8809	2.44473	0.48404	0.946706	6.31315	1.84682	0.0647735	pregnancy complications
722.1	Displacement of intervertebral disc	ACE2	X	15674316	chrX:15674316:A:C	C	A	A	604	13702	ADD	7153	0.857325	0.0833986	0.728042	1.00957	-1.84581	0.0649197	musculoskeletal
722.1	Displacement of intervertebral disc	ACE2	X	15674699	chrX:15674699:T:C	C	T	T	604	13702	ADD	7153	0.857325	0.0833986	0.728042	1.00957	-1.84581	0.0649197	musculoskeletal
722.1	Displacement of intervertebral disc	ACE2	X	15675338	chrX:15675338:T:A	A	T	T	604	13702	ADD	7153	0.857325	0.0833986	0.728042	1.00957	-1.84581	0.0649197	musculoskeletal
420.2	Pericarditis	DPP4	2	162073469	chr2:162073469:A:G	A	G	G	280	14744	ADD	7512	1.27914	0.133379	0.984887	1.66131	1.84579	0.0649229	circulatory system
386.9	Dizziness and giddiness (Light-headedness and vertigo)	ACE2	X	15674766	chrX:15674766:C:G	C	G	G	2344	12818	ADD	7581	1.07745	0.0404176	0.995388	1.16627	1.8456	0.0649508	sense organs
198.4	Secondary malignant neoplasm of liver	DPP4	2	162073199	chr2:162073199:T:G	T	G	G	118	15350	ADD	7734	1.43899	0.197317	0.977463	2.11843	1.84444	0.0651192	neoplasms
550.6	Incisional hernia	DPP4	2	162074215	chr2:162074215:T:G	G	T	T	306	14972	ADD	7639	0.789035	0.128472	0.613395	1.01497	-1.84433	0.0651347	digestive
331	Other cerebral degenerations	DPP4	2	162073222	chr2:162073222:G:A	G	A	A	36	14406	ADD	7221	1.81199	0.322367	0.963287	3.40843	1.84394	0.0651924	neurological
526.1	Cysts of the jaws	DPP4	2	162073199	chr2:162073199:T:G	T	G	G	10	15118	ADD	7564	2.27319	0.44545	0.949443	5.44256	1.8435	0.0652565	digestive
963	Poisoning by primarily systemic agents	ACE2	X	15674316	chrX:15674316:A:C	C	A	A	310	12966	ADD	6638	1.19622	0.097193	0.988735	1.44724	1.8434	0.0652701	injuries & poisonings
963	Poisoning by primarily systemic agents	ACE2	X	15674699	chrX:15674699:T:C	C	T	T	310	12966	ADD	6638	1.19622	0.097193	0.988735	1.44724	1.8434	0.0652701	injuries & poisonings
963	Poisoning by primarily systemic agents	ACE2	X	15675244	chrX:15675244:A:G	G	A	A	310	12966	ADD	6638	1.19622	0.097193	0.988735	1.44724	1.8434	0.0652701	injuries & poisonings
963	Poisoning by primarily systemic agents	ACE2	X	15675338	chrX:15675338:T:A	A	T	T	310	12966	ADD	6638	1.19622	0.097193	0.988735	1.44724	1.8434	0.0652701	injuries & poisonings
229	Benign neoplasm of unspecified sites	TMPRSS2	21	41508701	chr21:41508701:T:G	G	T	T	56	17594	ADD	8825	2.18735	0.424632	0.951636	5.02767	1.84322	0.0652965	neoplasms
260.3	Adult failure to thrive	ACE2	X	15675734	chrX:15675734:C:T	C	T	T	84	11776	ADD	5930	0.730288	0.170535	0.5228	1.02013	-1.84312	0.0653114	endocrine/metabolic
272.13	Mixed hyperlipidemia	LY6E	8	143017718	chr8:143017718:G:C	C	G	G	2942	8752	ADD	5847	1.11839	0.0607567	0.992835	1.25982	1.84162	0.0655314	endocrine/metabolic
317.1	Alcoholism	DPP4	2	162074215	chr2:162074215:T:G	G	T	T	628	10372	ADD	5500	1.1728	0.0865527	0.989803	1.38962	1.84154	0.0655423	mental disorders
269	Proteinuria	ACE2	X	15675244	chrX:15675244:A:G	G	A	A	1150	15522	ADD	8336	1.10633	0.054877	0.993514	1.23196	1.84138	0.0655661	endocrine/metabolic
561	Symptoms involving digestive system	DPP4	2	162073222	chr2:162073222:G:A	G	A	A	576	12050	ADD	6313	0.812349	0.112867	0.651133	1.01348	-1.84134	0.0655724	digestive
249	Secondary diabetes mellitus	ACE2	X	15675734	chrX:15675734:C:T	C	T	T	842	9124	ADD	4983	1.11866	0.0609027	0.992789	1.26049	1.84113	0.0656028	endocrine/metabolic
496.3	Bronchiectasis	ACE2	X	15674766	chrX:15674766:C:G	C	G	G	102	11930	ADD	6016	0.724658	0.174961	0.514287	1.02108	-1.84073	0.0656608	respiratory
345.3	Convulsions	LY6E	8	143018261	chr8:143018261:G:A	G	A	A	530	14406	ADD	7468	1.73669	0.299899	0.964824	3.12605	1.84056	0.0656865	neurological
357	Inflammatory and toxic neuropathy	TMPRSS2	21	41508700	chr21:41508700:G:A	G	A	A	544	15942	ADD	8243	1.64138	0.26926	0.968312	2.78231	1.84037	0.0657133	neurological
741.4	Joint effusions	TMPRSS2	21	41508700	chr21:41508700:G:A	G	A	A	546	14448	ADD	7497	1.65094	0.272494	0.967798	2.81631	1.83985	0.0657909	musculoskeletal
174.11	Malignant neoplasm of female breast	LY6E	8	143018261	chr8:143018261:G:A	G	A	A	698	14054	ADD	7376	0.426002	0.463798	0.171643	1.0573	-1.83983	0.0657928	neoplasms
707.2	Chronic ulcer of leg or foot	ACE2	X	15675734	chrX:15675734:C:T	C	T	T	392	16708	ADD	8550	0.855937	0.0845693	0.725198	1.01025	-1.83942	0.065854	dermatologic
253	Disorders of the pituitary gland and its hypothalamic control	LY6E	8	143017718	chr8:143017718:G:C	C	G	G	144	14812	ADD	7478	1.41976	0.190555	0.97727	2.0626	1.8393	0.0658705	endocrine/metabolic
722.1	Displacement of intervertebral disc	ACE2	X	15675244	chrX:15675244:A:G	G	A	A	604	13702	ADD	7153	0.857789	0.0834066	0.728425	1.01013	-1.83914	0.0658943	musculoskeletal
300.11	Generalized anxiety disorder	ACE2	X	15675734	chrX:15675734:C:T	C	T	T	606	7042	ADD	3824	1.15682	0.0792105	0.990471	1.35111	1.83909	0.0659014	mental disorders
800.1	Fracture of neck of femur	ACE2	X	15675734	chrX:15675734:C:T	C	T	T	48	15624	ADD	7836	1.50696	0.223021	0.973345	2.33313	1.83882	0.0659412	injuries & poisonings
575.1	Cholangitis	ACE2	X	15675734	chrX:15675734:C:T	C	T	T	42	16340	ADD	8191	0.640325	0.242455	0.398127	1.02986	-1.83861	0.0659727	digestive
428.2	Heart failure NOS	ACE2	X	15674766	chrX:15674766:C:G	C	G	G	266	12776	ADD	6521	0.830113	0.101275	0.680662	1.01238	-1.83849	0.0659909	circulatory system
433.11	Occlusion of cerebral arteries, with cerebral infarction	ACE2	X	15675734	chrX:15675734:C:T	C	T	T	106	14764	ADD	7435	0.743729	0.161098	0.54236	1.01986	-1.83787	0.0660809	circulatory system
634	Miscarriage; stillbirth	ACE2	X	15675734	chrX:15675734:C:T	C	T	T	346	16082	ADD	8214	0.859237	0.0825524	0.730877	1.01014	-1.83775	0.0660994	pregnancy complications
592.12	Chronic cystitis	LY6E	8	143018261	chr8:143018261:G:A	G	A	A	22	11610	ADD	5816	4.0545	0.761784	0.910973	18.0455	1.83756	0.0661266	genitourinary
565.1	Anal and rectal polyp	ACE2	X	15675734	chrX:15675734:C:T	C	T	T	50	14840	ADD	7445	0.660829	0.225495	0.424764	1.02809	-1.83712	0.0661926	digestive
1100	Family history	ACE2	X	15675734	chrX:15675734:C:T	C	T	T	220	16856	ADD	8538	1.25347	0.122976	0.985003	1.59512	1.83709	0.0661965	NULL
443	Peripheral vascular disease	LY6E	8	143018292	chr8:143018292:C:A	C	A	A	658	14400	ADD	7529	0.773642	0.139768	0.588261	1.01744	-1.83623	0.0663235	circulatory system
252.1	Hyperparathyroidism	DPP4	2	162073222	chr2:162073222:G:A	G	A	A	440	14812	ADD	7626	1.2312	0.113378	0.985877	1.53758	1.83451	0.0665781	endocrine/metabolic
540	Appendiceal conditions	LY6E	8	143017718	chr8:143017718:G:C	C	G	G	42	17610	ADD	8826	1.81345	0.324478	0.960086	3.42533	1.83443	0.0665901	digestive
473.3	Paralysis/spasm of vocal cords or larynx	LY6E	8	143018292	chr8:143018292:C:A	C	A	A	96	10330	ADD	5213	1.56688	0.24481	0.969733	2.53173	1.83442	0.0665919	respiratory
555	Inflammatory bowel disease and other gastroenteritis and colitis	TMPRSS2	21	41508701	chr21:41508701:T:G	G	T	T	116	12050	ADD	6083	1.83194	0.330022	0.959392	3.49806	1.83435	0.0666022	digestive
272.12	Hyperglyceridemia	ACE2	X	15675734	chrX:15675734:C:T	C	T	T	234	8752	ADD	4493	1.22171	0.109166	0.98638	1.51317	1.83434	0.0666032	endocrine/metabolic
242.2	Toxic multinodular goiter	LY6E	8	143018261	chr8:143018261:G:A	G	A	A	26	14014	ADD	7020	4.07157	0.765486	0.908193	18.2534	1.83416	0.0666297	endocrine/metabolic
509.1	Respiratory failure	LY6E	8	143017718	chr8:143017718:G:C	C	G	G	602	14020	ADD	7311	0.810168	0.114806	0.646921	1.01461	-1.83365	0.0667067	respiratory
250	Diabetes mellitus	ACE2	X	15674316	chrX:15674316:A:C	C	A	A	4350	9124	ADD	6737	0.935078	0.0366215	0.870314	1.00466	-1.83294	0.0668118	endocrine/metabolic
250	Diabetes mellitus	ACE2	X	15674699	chrX:15674699:T:C	C	T	T	4350	9124	ADD	6737	0.935078	0.0366215	0.870314	1.00466	-1.83294	0.0668118	endocrine/metabolic
250	Diabetes mellitus	ACE2	X	15675338	chrX:15675338:T:A	A	T	T	4350	9124	ADD	6737	0.935078	0.0366215	0.870314	1.00466	-1.83294	0.0668118	endocrine/metabolic
425.1	Primary/intrinsic cardiomyopathies	LY6E	8	143017718	chr8:143017718:G:C	C	G	G	1718	14744	ADD	8231	0.881102	0.0690613	0.769558	1.00881	-1.83289	0.0668189	circulatory system
560.3	Peritoneal or intestinal adhesions	TMPRSS2	21	41508701	chr21:41508701:T:G	G	T	T	26	12050	ADD	6038	2.57892	0.516921	0.936341	7.10299	1.83272	0.0668443	digestive
302	Sexual and gender identity disorders	DPP4	2	162073199	chr2:162073199:T:G	T	G	G	68	7042	ADD	3555	1.60122	0.256867	0.967842	2.64909	1.83271	0.0668453	mental disorders
172.22	Squamous cell carcinoma	LY6E	8	143018261	chr8:143018261:G:A	G	A	A	24	16746	ADD	8385	3.94987	0.749555	0.908994	17.1635	1.83267	0.0668523	neoplasms
279.11	Deficiency of humoral immunity	ACE2	X	15675734	chrX:15675734:C:T	C	T	T	28	15946	ADD	7987	0.559027	0.317463	0.30006	1.0415	-1.83189	0.0669676	endocrine/metabolic
743	Osteoporosis, osteopenia and pathological fracture	LY6E	8	143017718	chr8:143017718:G:C	C	G	G	824	15886	ADD	8355	1.18572	0.093009	0.988125	1.42282	1.83152	0.0670228	musculoskeletal
619.1	Noninflammatory disorders of ovary, fallopian tube, and broad ligament	DPP4	2	162073199	chr2:162073199:T:G	T	G	G	68	14484	ADD	7276	1.57506	0.248097	0.968541	2.56141	1.83113	0.0670818	genitourinary
288.3	Eosinophilia	DPP4	2	162073199	chr2:162073199:T:G	T	G	G	38	13698	ADD	6868	1.78855	0.317532	0.959883	3.33262	1.83102	0.0670976	hematopoietic
506	Empyema and pneumothorax	TMPRSS2	21	41508701	chr21:41508701:T:G	G	T	T	82	14020	ADD	7051	1.98694	0.374998	0.952766	4.14367	1.83094	0.0671102	respiratory
960.2	Allergy/adverse effect of penicillin	TMPRSS2	21	41508701	chr21:41508701:T:G	G	T	T	434	12966	ADD	6700	0.592553	0.285868	0.338373	1.03767	-1.83061	0.0671581	injuries & poisonings
269	Proteinuria	ACE2	X	15674316	chrX:15674316:A:C	C	A	A	1150	15522	ADD	8336	1.10566	0.0548738	0.992916	1.2312	1.83041	0.0671893	endocrine/metabolic
269	Proteinuria	ACE2	X	15674699	chrX:15674699:T:C	C	T	T	1150	15522	ADD	8336	1.10566	0.0548738	0.992916	1.2312	1.83041	0.0671893	endocrine/metabolic
269	Proteinuria	ACE2	X	15675338	chrX:15675338:T:A	A	T	T	1150	15522	ADD	8336	1.10566	0.0548738	0.992916	1.2312	1.83041	0.0671893	endocrine/metabolic
427.22	Atrial flutter	TMPRSS2	21	41508701	chr21:41508701:T:G	G	T	T	696	8980	ADD	4838	0.670603	0.218335	0.437138	1.02876	-1.83012	0.067232	circulatory system
252.2	Hypoparathyroidism	ACE2	X	15674766	chrX:15674766:C:G	C	G	G	40	14812	ADD	7426	1.65829	0.276418	0.964658	2.85068	1.82979	0.067281	endocrine/metabolic
755.4	Congenital anomalies of upper limb, including shoulder girdle	DPP4	2	162073469	chr2:162073469:A:G	A	G	G	8	17192	ADD	8600	2.26308	0.446398	0.943465	5.42844	1.8296	0.0673105	congenital anomalies
379.2	Disorders of vitreous body	LY6E	8	143018292	chr8:143018292:C:A	C	A	A	692	14222	ADD	7457	1.23879	0.117055	0.98483	1.55825	1.82937	0.0673441	sense organs
609.1	Infertility, male	TMPRSS2	21	41508700	chr21:41508700:G:A	G	A	A	56	14468	ADD	7262	2.49256	0.499418	0.936568	6.63361	1.82875	0.0674377	genitourinary
614.5	Inflammatory disease of cervix, vagina, and vulva	LY6E	8	143018292	chr8:143018292:C:A	C	A	A	1006	14548	ADD	7777	0.808998	0.115914	0.644586	1.01534	-1.82859	0.0674607	genitourinary
201	Hodgkin's disease	DPP4	2	162073199	chr2:162073199:T:G	T	G	G	70	17048	ADD	8559	0.565919	0.311343	0.307424	1.04177	-1.82854	0.0674678	neoplasms
459.9	Circulatory disease NEC	TMPRSS2	21	41508700	chr21:41508700:G:A	G	A	A	1608	12600	ADD	7104	1.40045	0.184285	0.975899	2.0097	1.82758	0.0676126	circulatory system
180.1	Cervical cancer	ACE2	X	15674316	chrX:15674316:A:C	C	A	A	84	12432	ADD	6258	1.48654	0.216958	0.971632	2.27432	1.82732	0.0676517	neoplasms
180.1	Cervical cancer	ACE2	X	15674699	chrX:15674699:T:C	C	T	T	84	12432	ADD	6258	1.48654	0.216958	0.971632	2.27432	1.82732	0.0676517	neoplasms
180.1	Cervical cancer	ACE2	X	15675338	chrX:15675338:T:A	A	T	T	84	12432	ADD	6258	1.48654	0.216958	0.971632	2.27432	1.82732	0.0676517	neoplasms
707.2	Chronic ulcer of leg or foot	ACE2	X	15674766	chrX:15674766:C:G	C	G	G	392	16708	ADD	8550	0.857134	0.08437	0.726495	1.01126	-1.82721	0.0676687	dermatologic
444.1	Arterial embolism and thrombosis of lower extremity artery	DPP4	2	162073199	chr2:162073199:T:G	T	G	G	166	14400	ADD	7283	1.34775	0.163335	0.978537	1.85626	1.82713	0.0676801	circulatory system
727.1	Synovitis and tenosynovitis	ACE2	X	15675734	chrX:15675734:C:T	C	T	T	890	11508	ADD	6199	1.12367	0.0638218	0.991551	1.2734	1.82702	0.0676965	musculoskeletal
180.1	Cervical cancer	ACE2	X	15675244	chrX:15675244:A:G	G	A	A	84	12432	ADD	6258	1.48671	0.217056	0.971554	2.27501	1.82701	0.0676981	neoplasms
274.11	Gouty arthropathy	LY6E	8	143018261	chr8:143018261:G:A	G	A	A	478	16026	ADD	8252	0.158929	1.00689	0.0220869	1.14359	-1.82671	0.067744	endocrine/metabolic
740.1	Osteoarthritis; localized	DPP4	2	162073199	chr2:162073199:T:G	T	G	G	1222	11812	ADD	6517	0.867177	0.0780322	0.744195	1.01048	-1.82633	0.0678004	musculoskeletal
415	Pulmonary heart disease	LY6E	8	143018292	chr8:143018292:C:A	C	A	A	1448	14402	ADD	7925	1.16553	0.0839166	0.988767	1.3739	1.82535	0.067948	circulatory system
498	Acute bronchospasm	TMPRSS2	21	41508700	chr21:41508700:G:A	G	A	A	38	11930	ADD	5984	3.06668	0.613932	0.920638	10.2153	1.82528	0.0679592	respiratory
327	Sleep disorders	LY6E	8	143017718	chr8:143017718:G:C	C	G	G	1722	10772	ADD	6247	1.12962	0.0667734	0.991046	1.28757	1.82527	0.06796	neurological
367.2	Astigmatism	TMPRSS2	21	41508700	chr21:41508700:G:A	G	A	A	572	14070	ADD	7321	1.62288	0.265306	0.964844	2.7297	1.82507	0.0679908	sense organs
458.2	Iatrogenic hypotension	DPP4	2	162074215	chr2:162074215:T:G	G	T	T	70	12600	ADD	6335	0.612492	0.268616	0.361788	1.03692	-1.82498	0.0680033	circulatory system
681.3	Cellulitis and abscess of arm/hand	DPP4	2	162073222	chr2:162073222:G:A	G	A	A	218	13750	ADD	6984	0.707273	0.189795	0.487565	1.02599	-1.8248	0.0680309	dermatologic
1008	Crushing or internal injury to organs	DPP4	2	162073222	chr2:162073222:G:A	G	A	A	36	17628	ADD	8832	0.383801	0.524795	0.137215	1.07353	-1.82477	0.0680355	NULL
696	Psoriasis and related disorders	DPP4	2	162073222	chr2:162073222:G:A	G	A	A	132	13140	ADD	6636	1.43117	0.196498	0.973711	2.10353	1.82439	0.0680934	dermatologic
964	Poisoning by agents primarily affecting blood constituents	TMPRSS2	21	41508700	chr21:41508700:G:A	G	A	A	36	12966	ADD	6501	3.15337	0.629703	0.917847	10.8338	1.82383	0.068178	injuries & poisonings
599.9	Other abnormality of urination	ACE2	X	15674316	chrX:15674316:A:C	C	A	A	786	10860	ADD	5823	0.882843	0.0683296	0.772185	1.00936	-1.82362	0.0682093	genitourinary
599.9	Other abnormality of urination	ACE2	X	15674699	chrX:15674699:T:C	C	T	T	786	10860	ADD	5823	0.882843	0.0683296	0.772185	1.00936	-1.82362	0.0682093	genitourinary
599.9	Other abnormality of urination	ACE2	X	15675338	chrX:15675338:T:A	A	T	T	786	10860	ADD	5823	0.882843	0.0683296	0.772185	1.00936	-1.82362	0.0682093	genitourinary
250.41	Impaired fasting glucose	LY6E	8	143018261	chr8:143018261:G:A	G	A	A	532	9124	ADD	4828	1.70603	0.293134	0.960441	3.03042	1.82227	0.0684142	endocrine/metabolic
573.9	Abnormal serum enzyme levels	DPP4	2	162073199	chr2:162073199:T:G	T	G	G	522	14022	ADD	7272	0.81336	0.113388	0.651278	1.01578	-1.82189	0.068471	digestive
427.22	Atrial flutter	DPP4	2	162073199	chr2:162073199:T:G	T	G	G	696	8980	ADD	4838	1.19004	0.0955043	0.986892	1.43501	1.8218	0.0684851	circulatory system
401.22	Hypertensive chronic kidney disease	ACE2	X	15674316	chrX:15674316:A:C	C	A	A	2368	5666	ADD	4017	0.905267	0.0546528	0.81331	1.00762	-1.82106	0.0685983	circulatory system
401.22	Hypertensive chronic kidney disease	ACE2	X	15674699	chrX:15674699:T:C	C	T	T	2368	5666	ADD	4017	0.905267	0.0546528	0.81331	1.00762	-1.82106	0.0685983	circulatory system
401.22	Hypertensive chronic kidney disease	ACE2	X	15675244	chrX:15675244:A:G	G	A	A	2368	5666	ADD	4017	0.905267	0.0546528	0.81331	1.00762	-1.82106	0.0685983	circulatory system
401.22	Hypertensive chronic kidney disease	ACE2	X	15675338	chrX:15675338:T:A	A	T	T	2368	5666	ADD	4017	0.905267	0.0546528	0.81331	1.00762	-1.82106	0.0685983	circulatory system
427.12	Paroxysmal ventricular tachycardia	TMPRSS2	21	41508700	chr21:41508700:G:A	G	A	A	910	8980	ADD	4945	0.541919	0.336507	0.28022	1.04802	-1.82058	0.0686705	circulatory system
260.3	Adult failure to thrive	LY6E	8	143017718	chr8:143017718:G:C	C	G	G	84	11776	ADD	5930	1.52105	0.230404	0.968329	2.38926	1.82028	0.0687163	endocrine/metabolic
560.1	Paralytic ileus	ACE2	X	15674766	chrX:15674766:C:G	C	G	G	80	12050	ADD	6065	1.37475	0.174898	0.975774	1.93685	1.81975	0.0687976	digestive
752	Nervous system congenital anomalies	ACE2	X	15674766	chrX:15674766:C:G	C	G	G	32	17474	ADD	8753	0.559188	0.319456	0.298976	1.04587	-1.81956	0.068826	congenital anomalies
789	Nausea and vomiting	DPP4	2	162074215	chr2:162074215:T:G	G	T	T	3202	11718	ADD	7460	0.924221	0.0433262	0.848979	1.00613	-1.81884	0.0689356	symptoms
384	Other disorders of tympanic membrane	DPP4	2	162073199	chr2:162073199:T:G	T	G	G	14	15516	ADD	7765	2.15148	0.421247	0.942259	4.9125	1.81878	0.0689457	sense organs
333	Extrapyramidal disease and abnormal movement disorders	LY6E	8	143018261	chr8:143018261:G:A	G	A	A	94	14406	ADD	7250	2.66437	0.5389	0.926577	7.66138	1.81846	0.0689943	neurological
755.6	Other congenital anomalies of lower limb, including pelvic girdle	TMPRSS2	21	41508700	chr21:41508700:G:A	G	A	A	10	17192	ADD	8601	3.96369	0.757942	0.897301	17.509	1.81699	0.0692182	congenital anomalies
842	Other sprains and strains	DPP4	2	162074215	chr2:162074215:T:G	G	T	T	66	13340	ADD	6703	1.53859	0.237238	0.966466	2.44941	1.81619	0.0693419	injuries & poisonings
759	Other and unspecified congenital anomalies	ACE2	X	15675734	chrX:15675734:C:T	C	T	T	60	17180	ADD	8620	0.668888	0.22144	0.433375	1.03239	-1.81601	0.0693681	congenital anomalies
871	Open wounds of extremities	LY6E	8	143018292	chr8:143018292:C:A	C	A	A	376	15452	ADD	7914	1.31174	0.149456	0.978657	1.75819	1.81561	0.06943	injuries & poisonings
272.12	Hyperglyceridemia	TMPRSS2	21	41508701	chr21:41508701:T:G	G	T	T	234	8752	ADD	4493	1.60333	0.260051	0.963091	2.66919	1.81535	0.0694705	endocrine/metabolic
352	Disorders of other cranial nerves	DPP4	2	162074215	chr2:162074215:T:G	G	T	T	126	14182	ADD	7154	0.699219	0.19718	0.475087	1.02909	-1.81454	0.0695945	neurological
198.4	Secondary malignant neoplasm of liver	TMPRSS2	21	41508701	chr21:41508701:T:G	G	T	T	118	15350	ADD	7734	1.77816	0.317453	0.954451	3.31273	1.81311	0.0698149	neoplasms
262	Mineral deficiency NEC	LY6E	8	143018292	chr8:143018292:C:A	C	A	A	66	11776	ADD	5921	1.77799	0.317442	0.954379	3.31235	1.81287	0.069852	endocrine/metabolic
150	Cancer of esophagus	DPP4	2	162073469	chr2:162073469:A:G	A	G	G	32	16170	ADD	8101	1.68567	0.288076	0.958435	2.96472	1.8126	0.0698942	neoplasms
528.12	Oral aphthae	DPP4	2	162073199	chr2:162073199:T:G	T	G	G	8	16206	ADD	8107	2.111	0.412225	0.941024	4.7356	1.8125	0.0699083	digestive
540	Appendiceal conditions	LY6E	8	143018292	chr8:143018292:C:A	C	A	A	42	17610	ADD	8826	1.93703	0.364789	0.947608	3.95955	1.81244	0.0699178	digestive
701	Other hypertrophic and atrophic conditions of skin	DPP4	2	162073469	chr2:162073469:A:G	A	G	G	464	15778	ADD	8121	1.20858	0.104595	0.984568	1.48357	1.81127	0.0700989	dermatologic
756.5	Congenital osteodystrophies	LY6E	8	143017718	chr8:143017718:G:C	C	G	G	64	17192	ADD	8628	1.53082	0.235207	0.965419	2.42735	1.81034	0.0702435	congenital anomalies
580.31	Nephritis and nephropathy in diseases classified elsewhere	LY6E	8	143017718	chr8:143017718:G:C	C	G	G	178	10540	ADD	5359	1.3274	0.156459	0.976839	1.80376	1.81019	0.0702661	genitourinary
729	Other disorders of soft tissues	LY6E	8	143018261	chr8:143018261:G:A	G	A	A	576	11508	ADD	6042	0.274291	0.714665	0.0675907	1.1131	-1.81003	0.0702907	musculoskeletal
695.4	Lupus (localized and systemic)	DPP4	2	162073199	chr2:162073199:T:G	T	G	G	356	13478	ADD	6917	1.24589	0.121462	0.981953	1.58077	1.81003	0.0702914	dermatologic
701.6	Acquired acanthosis nigricans	LY6E	8	143018261	chr8:143018261:G:A	G	A	A	22	15778	ADD	7900	3.86277	0.746758	0.893834	16.6932	1.80967	0.0703474	dermatologic
510	Other diseases of lung	LY6E	8	143018292	chr8:143018292:C:A	C	A	A	566	16598	ADD	8582	1.25692	0.12636	0.98118	1.61014	1.8096	0.0703574	respiratory
292.4	Altered mental status	LY6E	8	143018261	chr8:143018261:G:A	G	A	A	408	14340	ADD	7374	1.88863	0.351396	0.948501	3.76059	1.8095	0.0703732	mental disorders
433.21	Cerebral artery occlusion, with cerebral infarction	DPP4	2	162073222	chr2:162073222:G:A	G	A	A	896	14764	ADD	7830	1.16322	0.0835632	0.987494	1.37023	1.80936	0.0703953	circulatory system
255	Disorders of adrenal glands	TMPRSS2	21	41508700	chr21:41508700:G:A	G	A	A	204	14812	ADD	7508	1.9598	0.371904	0.94547	4.06236	1.80919	0.0704214	endocrine/metabolic
270.3	Disorders of plasma protein metabolism	LY6E	8	143018292	chr8:143018292:C:A	C	A	A	136	15522	ADD	7829	1.51221	0.228598	0.966114	2.36698	1.80916	0.0704262	endocrine/metabolic
614.53	Cyst or abscess of Bartholin's gland	TMPRSS2	21	41508701	chr21:41508701:T:G	G	T	T	38	14548	ADD	7293	2.25514	0.449637	0.934205	5.44384	1.8086	0.0705134	genitourinary
599.9	Other abnormality of urination	ACE2	X	15675244	chrX:15675244:A:G	G	A	A	786	10860	ADD	5823	0.883795	0.0683378	0.773005	1.01046	-1.80763	0.0706637	genitourinary
427	Cardiac dysrhythmias	TMPRSS2	21	41508701	chr21:41508701:T:G	G	T	T	3288	8980	ADD	6134	0.825369	0.106189	0.670286	1.01633	-1.80739	0.0707008	circulatory system
155.1	Malignant neoplasm of liver, primary	ACE2	X	15675244	chrX:15675244:A:G	G	A	A	132	16170	ADD	8151	1.27216	0.133194	0.979867	1.65165	1.80727	0.0707208	neoplasms
394.7	Disease of tricuspid valve	ACE2	X	15674316	chrX:15674316:A:C	C	A	A	298	14322	ADD	7310	1.20185	0.101764	0.984526	1.46714	1.80672	0.0708065	circulatory system
394.7	Disease of tricuspid valve	ACE2	X	15674699	chrX:15674699:T:C	C	T	T	298	14322	ADD	7310	1.20185	0.101764	0.984526	1.46714	1.80672	0.0708065	circulatory system
394.7	Disease of tricuspid valve	ACE2	X	15675244	chrX:15675244:A:G	G	A	A	298	14322	ADD	7310	1.20185	0.101764	0.984526	1.46714	1.80672	0.0708065	circulatory system
394.7	Disease of tricuspid valve	ACE2	X	15675338	chrX:15675338:T:A	A	T	T	298	14322	ADD	7310	1.20185	0.101764	0.984526	1.46714	1.80672	0.0708065	circulatory system
367.4	Presbyopia	TMPRSS2	21	41508701	chr21:41508701:T:G	G	T	T	300	16726	ADD	8513	0.534708	0.346513	0.271122	1.05456	-1.80667	0.0708143	sense organs
496	Chronic airway obstruction	DPP4	2	162074215	chr2:162074215:T:G	G	T	T	1502	11930	ADD	6716	0.895944	0.0608244	0.795256	1.00938	-1.80648	0.0708439	respiratory
401.3	Other hypertensive complications	ACE2	X	15674766	chrX:15674766:C:G	C	G	G	846	5666	ADD	3256	1.12708	0.0662487	0.98984	1.28336	1.80581	0.0709476	circulatory system
375	Disorders of lacrimal system	ACE2	X	15674766	chrX:15674766:C:G	C	G	G	58	14222	ADD	7140	0.652911	0.236096	0.411044	1.0371	-1.80568	0.0709679	sense organs
150	Cancer of esophagus	DPP4	2	162073199	chr2:162073199:T:G	T	G	G	32	16170	ADD	8101	1.69286	0.29168	0.955743	2.99846	1.80477	0.0711102	neoplasms
789.1	Persistent vomiting	TMPRSS2	21	41508700	chr21:41508700:G:A	G	A	A	12	11718	ADD	5865	3.87287	0.750276	0.890014	16.8527	1.80466	0.0711273	symptoms
603	Other disorders of testis	DPP4	2	162073199	chr2:162073199:T:G	T	G	G	48	14468	ADD	7258	1.68852	0.290297	0.955882	2.98269	1.80454	0.0711474	genitourinary
276.1	Electrolyte imbalance	DPP4	2	162074215	chr2:162074215:T:G	G	T	T	1886	11046	ADD	6466	1.10154	0.0536116	0.99167	1.22359	1.80394	0.0712411	endocrine/metabolic
573.2	Liver replaced by transplant	TMPRSS2	21	41508700	chr21:41508700:G:A	G	A	A	140	14022	ADD	7081	2.18812	0.434336	0.934033	5.12599	1.80284	0.0714129	digestive
433.21	Cerebral artery occlusion, with cerebral infarction	DPP4	2	162073199	chr2:162073199:T:G	T	G	G	896	14764	ADD	7830	1.15682	0.0808183	0.987354	1.35537	1.8025	0.0714674	circulatory system
480.3	Pneumonia due to fungus (mycoses)	TMPRSS2	21	41508700	chr21:41508700:G:A	G	A	A	44	13578	ADD	6811	3.07308	0.622862	0.906551	10.4173	1.80245	0.0714743	respiratory
149.9	Cancer of of nasal cavities	ACE2	X	15675734	chrX:15675734:C:T	C	T	T	18	17514	ADD	8766	1.92235	0.362598	0.944472	3.9127	1.80241	0.0714812	neoplasms
580.2	Nephrotic syndrome without mention of glomerulonephritis	LY6E	8	143018261	chr8:143018261:G:A	G	A	A	102	10540	ADD	5321	2.55525	0.520516	0.921231	7.08756	1.80234	0.0714914	genitourinary
743.9	Osteopenia or other disorder of bone and cartilage	ACE2	X	15674316	chrX:15674316:A:C	C	A	A	560	15886	ADD	8223	0.845496	0.0931347	0.704426	1.01482	-1.80203	0.0715409	musculoskeletal
743.9	Osteopenia or other disorder of bone and cartilage	ACE2	X	15674699	chrX:15674699:T:C	C	T	T	560	15886	ADD	8223	0.845496	0.0931347	0.704426	1.01482	-1.80203	0.0715409	musculoskeletal
743.9	Osteopenia or other disorder of bone and cartilage	ACE2	X	15675338	chrX:15675338:T:A	A	T	T	560	15886	ADD	8223	0.845496	0.0931347	0.704426	1.01482	-1.80203	0.0715409	musculoskeletal
761	Cervicalgia	DPP4	2	162073469	chr2:162073469:A:G	A	G	G	1596	14290	ADD	7943	0.893145	0.0627388	0.789803	1.01001	-1.80122	0.071668	symptoms
276.5	Hypovolemia	TMPRSS2	21	41508701	chr21:41508701:T:G	G	T	T	976	11046	ADD	6011	0.729647	0.174994	0.517795	1.02818	-1.80117	0.0716759	endocrine/metabolic
530.12	Ulcer of esophagus	DPP4	2	162073199	chr2:162073199:T:G	T	G	G	22	9678	ADD	4850	0.319534	0.63346	0.0923239	1.10591	-1.80105	0.0716953	digestive
155.1	Malignant neoplasm of liver, primary	ACE2	X	15674316	chrX:15674316:A:C	C	A	A	132	16170	ADD	8151	1.27108	0.133197	0.979031	1.65026	1.80087	0.0717241	neoplasms
155.1	Malignant neoplasm of liver, primary	ACE2	X	15674699	chrX:15674699:T:C	C	T	T	132	16170	ADD	8151	1.27108	0.133197	0.979031	1.65026	1.80087	0.0717241	neoplasms
155.1	Malignant neoplasm of liver, primary	ACE2	X	15675338	chrX:15675338:T:A	A	T	T	132	16170	ADD	8151	1.27108	0.133197	0.979031	1.65026	1.80087	0.0717241	neoplasms
535	Gastritis and duodenitis	TMPRSS2	21	41508700	chr21:41508700:G:A	G	A	A	426	14340	ADD	7383	1.68241	0.288967	0.954914	2.96416	1.80031	0.0718116	digestive
479	Other upper respiratory disease	ACE2	X	15675734	chrX:15675734:C:T	C	T	T	1008	10330	ADD	5669	1.10955	0.0577539	0.990806	1.24254	1.80003	0.0718562	respiratory
716.9	Arthropathy NOS	DPP4	2	162073469	chr2:162073469:A:G	A	G	G	928	14484	ADD	7706	1.14947	0.0774034	0.987668	1.33777	1.79965	0.0719152	musculoskeletal
200	Myeloproliferative disease	DPP4	2	162073199	chr2:162073199:T:G	T	G	G	134	17048	ADD	8591	0.665837	0.226038	0.427527	1.03698	-1.7993	0.0719717	neoplasms
506	Empyema and pneumothorax	ACE2	X	15674316	chrX:15674316:A:C	C	A	A	82	14020	ADD	7051	0.676634	0.217103	0.442135	1.03551	-1.79926	0.071978	respiratory
506	Empyema and pneumothorax	ACE2	X	15674699	chrX:15674699:T:C	C	T	T	82	14020	ADD	7051	0.676634	0.217103	0.442135	1.03551	-1.79926	0.071978	respiratory
506	Empyema and pneumothorax	ACE2	X	15675338	chrX:15675338:T:A	A	T	T	82	14020	ADD	7051	0.676634	0.217103	0.442135	1.03551	-1.79926	0.071978	respiratory
743.9	Osteopenia or other disorder of bone and cartilage	ACE2	X	15675244	chrX:15675244:A:G	G	A	A	560	15886	ADD	8223	0.845739	0.0931408	0.70462	1.01512	-1.79882	0.0720464	musculoskeletal
701.5	Abnormal granulation tissue	DPP4	2	162073199	chr2:162073199:T:G	T	G	G	16	15778	ADD	7897	2.16265	0.428806	0.933223	5.01171	1.79879	0.0720515	dermatologic
112	Candidiasis	LY6E	8	143017718	chr8:143017718:G:C	C	G	G	1246	12868	ADD	7057	1.14719	0.0763467	0.987753	1.33236	1.79856	0.0720879	infectious diseases
110.2	Dermatomycoses	TMPRSS2	21	41508701	chr21:41508701:T:G	G	T	T	102	12868	ADD	6485	1.87539	0.349641	0.945097	3.7214	1.79846	0.0721037	infectious diseases
250.42	Other abnormal glucose	DPP4	2	162073199	chr2:162073199:T:G	T	G	G	2348	9124	ADD	5736	0.901753	0.0575045	0.805637	1.00934	-1.79837	0.0721177	endocrine/metabolic
418	Nonspecific chest pain	ACE2	X	15674316	chrX:15674316:A:C	C	A	A	5352	9748	ADD	7550	0.94258	0.0329076	0.883705	1.00538	-1.79699	0.0723375	circulatory system
418	Nonspecific chest pain	ACE2	X	15674699	chrX:15674699:T:C	C	T	T	5352	9748	ADD	7550	0.94258	0.0329076	0.883705	1.00538	-1.79699	0.0723375	circulatory system
418	Nonspecific chest pain	ACE2	X	15675244	chrX:15675244:A:G	G	A	A	5352	9748	ADD	7550	0.94258	0.0329076	0.883705	1.00538	-1.79699	0.0723375	circulatory system
418	Nonspecific chest pain	ACE2	X	15675338	chrX:15675338:T:A	A	T	T	5352	9748	ADD	7550	0.94258	0.0329076	0.883705	1.00538	-1.79699	0.0723375	circulatory system
716.1	Unspecified polyarthropathy or polyarthritis	LY6E	8	143018261	chr8:143018261:G:A	G	A	A	20	14484	ADD	7252	3.9215	0.760811	0.882772	17.4203	1.79608	0.0724826	musculoskeletal
717	Polymyalgia Rheumatica	TMPRSS2	21	41508700	chr21:41508700:G:A	G	A	A	60	17672	ADD	8866	2.50027	0.510262	0.919711	6.79709	1.79594	0.0725043	musculoskeletal
1009	Injury, NOS	LY6E	8	143017718	chr8:143017718:G:C	C	G	G	1346	14966	ADD	8156	1.13719	0.0715974	0.988299	1.30851	1.79557	0.0725633	NULL
580.3	Nephritis and nephropathy without mention of glomerulonephritis	LY6E	8	143017718	chr8:143017718:G:C	C	G	G	172	10540	ADD	5356	1.37003	0.175345	0.971576	1.9319	1.79551	0.0725718	genitourinary
800.4	Fracture of patella	LY6E	8	143017718	chr8:143017718:G:C	C	G	G	22	15624	ADD	7823	1.84907	0.342394	0.945163	3.61742	1.79525	0.0726143	injuries & poisonings
506	Empyema and pneumothorax	ACE2	X	15675244	chrX:15675244:A:G	G	A	A	82	14020	ADD	7051	0.677185	0.217146	0.442458	1.03643	-1.79516	0.0726281	respiratory
367.4	Presbyopia	ACE2	X	15674316	chrX:15674316:A:C	C	A	A	300	16726	ADD	8513	1.21662	0.109238	0.982138	1.50709	1.79497	0.072658	sense organs
367.4	Presbyopia	ACE2	X	15674699	chrX:15674699:T:C	C	T	T	300	16726	ADD	8513	1.21662	0.109238	0.982138	1.50709	1.79497	0.072658	sense organs
367.4	Presbyopia	ACE2	X	15675338	chrX:15675338:T:A	A	T	T	300	16726	ADD	8513	1.21662	0.109238	0.982138	1.50709	1.79497	0.072658	sense organs
912	Insect bite	DPP4	2	162073222	chr2:162073222:G:A	G	A	A	46	17388	ADD	8717	1.70497	0.297322	0.952	3.05351	1.79452	0.0727302	injuries & poisonings
427.42	Cardiac arrest	ACE2	X	15674766	chrX:15674766:C:G	C	G	G	168	8980	ADD	4574	0.79278	0.129427	0.615155	1.0217	-1.79413	0.072793	circulatory system
427.4	Cardiac arrest and ventricular fibrillation	LY6E	8	143017718	chr8:143017718:G:C	C	G	G	136	8980	ADD	4558	1.4268	0.198119	0.967663	2.10379	1.79405	0.0728058	circulatory system
381.2	Eustachian tube disorders	DPP4	2	162074215	chr2:162074215:T:G	G	T	T	142	15516	ADD	7829	0.717505	0.185199	0.499095	1.03149	-1.79253	0.0730479	sense organs
451	Phlebitis and thrombophlebitis	ACE2	X	15675734	chrX:15675734:C:T	C	T	T	150	11138	ADD	5644	0.788735	0.132402	0.608457	1.02243	-1.79246	0.0730593	circulatory system
735.1	Flat foot	LY6E	8	143017718	chr8:143017718:G:C	C	G	G	154	15480	ADD	7817	0.654262	0.236705	0.411404	1.04048	-1.7923	0.0730846	musculoskeletal
256	Ovarian dysfunction	TMPRSS2	21	41508700	chr21:41508700:G:A	G	A	A	290	14812	ADD	7551	1.72994	0.305955	0.949731	3.15108	1.79139	0.0732307	endocrine/metabolic
379.2	Disorders of vitreous body	DPP4	2	162074215	chr2:162074215:T:G	G	T	T	692	14222	ADD	7457	0.857468	0.0858494	0.724674	1.0146	-1.79118	0.0732641	sense organs
614.32	Chronic inflammatory pelvic disease	ACE2	X	15675734	chrX:15675734:C:T	C	T	T	38	14548	ADD	7293	1.70947	0.299353	0.950715	3.07376	1.79113	0.0732722	genitourinary
041.4	E. coli	LY6E	8	143018261	chr8:143018261:G:A	G	A	A	164	13970	ADD	7067	2.31613	0.468961	0.923811	5.8069	1.79098	0.073297	infectious diseases
571.51	Cirrhosis of liver without mention of alcohol	LY6E	8	143018261	chr8:143018261:G:A	G	A	A	566	14022	ADD	7294	0.27782	0.715246	0.0683825	1.12871	-1.79069	0.0733434	digestive
374.6	Dermatochalasis	DPP4	2	162073469	chr2:162073469:A:G	A	G	G	50	14556	ADD	7303	1.56968	0.251809	0.958232	2.57129	1.79053	0.0733689	sense organs
573	Other disorders of liver	DPP4	2	162074215	chr2:162074215:T:G	G	T	T	304	14022	ADD	7163	0.795933	0.127472	0.619972	1.02184	-1.79051	0.0733723	digestive
560.3	Peritoneal or intestinal adhesions	DPP4	2	162074215	chr2:162074215:T:G	G	T	T	26	12050	ADD	6038	0.466627	0.425809	0.202545	1.07503	-1.79006	0.0734437	digestive
452.2	Deep vein thrombosis [DVT]	LY6E	8	143018261	chr8:143018261:G:A	G	A	A	868	11138	ADD	6003	0.471493	0.420031	0.206988	1.074	-1.78999	0.0734555	circulatory system
530.9	Heartburn	DPP4	2	162073222	chr2:162073222:G:A	G	A	A	208	9678	ADD	4943	0.712571	0.189367	0.49163	1.0328	-1.78951	0.0735322	digestive
367.1	Myopia	LY6E	8	143017718	chr8:143017718:G:C	C	G	G	1066	14070	ADD	7568	1.15341	0.0797599	0.986491	1.34858	1.78944	0.0735438	sense organs
415.1	Acute pulmonary heart disease	LY6E	8	143018261	chr8:143018261:G:A	G	A	A	392	14402	ADD	7397	0.0837846	1.38581	0.00554065	1.26697	-1.78921	0.0735808	circulatory system
726.2	Synoviopathy	DPP4	2	162073469	chr2:162073469:A:G	A	G	G	138	11508	ADD	5823	0.682532	0.213523	0.44913	1.03723	-1.78878	0.0736502	musculoskeletal
199	Neoplasm of uncertain behavior	LY6E	8	143018292	chr8:143018292:C:A	C	A	A	484	15350	ADD	7917	1.26757	0.132559	0.97755	1.64364	1.78867	0.0736675	neoplasms
807	Fracture of ribs	ACE2	X	15674316	chrX:15674316:A:C	C	A	A	102	15624	ADD	7863	0.698323	0.200815	0.47111	1.03512	-1.78808	0.0737634	injuries & poisonings
807	Fracture of ribs	ACE2	X	15674699	chrX:15674699:T:C	C	T	T	102	15624	ADD	7863	0.698323	0.200815	0.47111	1.03512	-1.78808	0.0737634	injuries & poisonings
807	Fracture of ribs	ACE2	X	15675338	chrX:15675338:T:A	A	T	T	102	15624	ADD	7863	0.698323	0.200815	0.47111	1.03512	-1.78808	0.0737634	injuries & poisonings
281.11	Pernicious anemia	DPP4	2	162073469	chr2:162073469:A:G	A	G	G	52	8724	ADD	4388	1.62799	0.272566	0.954209	2.77754	1.788	0.0737767	hematopoietic
150	Cancer of esophagus	DPP4	2	162073222	chr2:162073222:G:A	G	A	A	32	16170	ADD	8101	1.70997	0.300073	0.949657	3.07902	1.78783	0.0738041	neoplasms
617	Disorders secondary to childbirth, surgery, trauma	DPP4	2	162074215	chr2:162074215:T:G	G	T	T	472	16512	ADD	8492	1.19302	0.0987511	0.983086	1.44779	1.78723	0.0739011	genitourinary
352.2	Facial nerve disorders [CN7]	ACE2	X	15674766	chrX:15674766:C:G	C	G	G	138	14182	ADD	7160	1.29206	0.143378	0.975531	1.7113	1.78718	0.0739086	neurological
695.22	Pemphigus and pemphigoid	DPP4	2	162073199	chr2:162073199:T:G	T	G	G	22	13610	ADD	6816	0.391059	0.525371	0.139652	1.09506	-1.78711	0.0739193	dermatologic
362.9	Retinal edema	LY6E	8	143018292	chr8:143018292:C:A	C	A	A	124	13982	ADD	7053	1.49944	0.226685	0.961558	2.33821	1.78704	0.0739318	sense organs
790.1	Elevated sedimentation rate	DPP4	2	162074215	chr2:162074215:T:G	G	T	T	118	14602	ADD	7360	0.691734	0.206283	0.461691	1.0364	-1.78664	0.0739952	symptoms
756	Other congenital musculoskeletal anomalies	DPP4	2	162073199	chr2:162073199:T:G	T	G	G	20	17192	ADD	8606	1.9522	0.374427	0.937153	4.06665	1.78661	0.0740007	congenital anomalies
433.1	Occlusion and stenosis of precerebral arteries	ACE2	X	15675734	chrX:15675734:C:T	C	T	T	302	14764	ADD	7533	0.862184	0.083005	0.732733	1.0145	-1.78648	0.0740212	circulatory system
367.1	Myopia	DPP4	2	162074215	chr2:162074215:T:G	G	T	T	1066	14070	ADD	7568	0.883997	0.0690416	0.772115	1.01209	-1.78591	0.074114	sense organs
735.23	Hallux rigidus	LY6E	8	143018292	chr8:143018292:C:A	C	A	A	42	15480	ADD	7761	1.91069	0.362572	0.938789	3.88876	1.78575	0.0741394	musculoskeletal
519.8	Other diseases of respiratory system, NEC	DPP4	2	162073199	chr2:162073199:T:G	T	G	G	174	16086	ADD	8130	0.701034	0.198923	0.474696	1.03529	-1.78561	0.0741626	respiratory
807	Fracture of ribs	ACE2	X	15675244	chrX:15675244:A:G	G	A	A	102	15624	ADD	7863	0.698858	0.200779	0.471504	1.03584	-1.78458	0.0743291	injuries & poisonings
297.2	Suicide or self-inflicted injury	TMPRSS2	21	41508700	chr21:41508700:G:A	G	A	A	42	7042	ADD	3542	2.94482	0.605375	0.899007	9.64618	1.7841	0.0744076	mental disorders
634	Miscarriage; stillbirth	ACE2	X	15675244	chrX:15675244:A:G	G	A	A	346	16082	ADD	8214	1.16904	0.0875446	0.984717	1.38787	1.78404	0.0744168	pregnancy complications
300.11	Generalized anxiety disorder	DPP4	2	162073222	chr2:162073222:G:A	G	A	A	606	7042	ADD	3824	0.818439	0.112325	0.656713	1.01999	-1.78372	0.0744697	mental disorders
568.1	Peritoneal adhesions (postoperative) (postinfection)	TMPRSS2	21	41508700	chr21:41508700:G:A	G	A	A	46	14840	ADD	7443	2.99765	0.615593	0.896991	10.0179	1.78337	0.0745261	digestive
763	Thoracic or lumbosacral neuritis or radiculitis, unspecified	DPP4	2	162074215	chr2:162074215:T:G	G	T	T	1076	13410	ADD	7243	1.12672	0.0669154	0.988227	1.28462	1.78298	0.07459	symptoms
246.2	Thyroid cyst	LY6E	8	143018261	chr8:143018261:G:A	G	A	A	16	14014	ADD	7015	3.78399	0.746447	0.87614	16.3428	1.78282	0.0746158	endocrine/metabolic
634	Miscarriage; stillbirth	ACE2	X	15674316	chrX:15674316:A:C	C	A	A	346	16082	ADD	8214	1.16862	0.0874225	0.984602	1.38704	1.78246	0.0746738	pregnancy complications
634	Miscarriage; stillbirth	ACE2	X	15674699	chrX:15674699:T:C	C	T	T	346	16082	ADD	8214	1.16862	0.0874225	0.984602	1.38704	1.78246	0.0746738	pregnancy complications
634	Miscarriage; stillbirth	ACE2	X	15675338	chrX:15675338:T:A	A	T	T	346	16082	ADD	8214	1.16862	0.0874225	0.984602	1.38704	1.78246	0.0746738	pregnancy complications
601.8	Other inflammatory disorders of male genital organs	LY6E	8	143017718	chr8:143017718:G:C	C	G	G	22	15234	ADD	7628	1.92356	0.367067	0.936824	3.9496	1.78218	0.0747204	genitourinary
707.2	Chronic ulcer of leg or foot	ACE2	X	15675244	chrX:15675244:A:G	G	A	A	392	16708	ADD	8550	1.1698	0.0880112	0.984452	1.39003	1.78192	0.0747626	dermatologic
613.5	Mastodynia	LY6E	8	143018261	chr8:143018261:G:A	G	A	A	422	16084	ADD	8253	0.0824298	1.40075	0.00529372	1.28353	-1.78176	0.0747881	genitourinary
227.1	Benign neoplasm of adrenal gland	LY6E	8	143018292	chr8:143018292:C:A	C	A	A	108	17026	ADD	8567	0.495122	0.394576	0.22848	1.07294	-1.78154	0.0748251	neoplasms
389.5	Disorders of acoustic nerve	LY6E	8	143018261	chr8:143018261:G:A	G	A	A	10	15556	ADD	7783	3.81502	0.75162	0.874412	16.6447	1.78141	0.0748453	sense organs
041.1	Staphylococcus infections	DPP4	2	162074215	chr2:162074215:T:G	G	T	T	150	13970	ADD	7060	1.33806	0.163489	0.971211	1.84348	1.78129	0.0748657	infectious diseases
255.11	Cushing's syndrome	LY6E	8	143018261	chr8:143018261:G:A	G	A	A	22	14812	ADD	7417	3.82699	0.753492	0.873945	16.7583	1.78115	0.0748887	endocrine/metabolic
687.2	Localized superficial swelling, mass, or lump	LY6E	8	143018292	chr8:143018292:C:A	C	A	A	260	17048	ADD	8654	1.36811	0.17598	0.969009	1.9316	1.78107	0.0749009	dermatologic
117	Mycoses	DPP4	2	162074215	chr2:162074215:T:G	G	T	T	102	12868	ADD	6485	1.43029	0.201061	0.964455	2.12114	1.77996	0.0750826	infectious diseases
627.1	Postmenopausal bleeding	LY6E	8	143018261	chr8:143018261:G:A	G	A	A	440	12686	ADD	6563	0.277275	0.720877	0.0674993	1.139	-1.77942	0.0751704	genitourinary
357	Inflammatory and toxic neuropathy	ACE2	X	15674766	chrX:15674766:C:G	C	G	G	544	15942	ADD	8243	1.14438	0.0758019	0.986386	1.32768	1.77913	0.075218	neurological
333	Extrapyramidal disease and abnormal movement disorders	ACE2	X	15675244	chrX:15675244:A:G	G	A	A	94	14406	ADD	7250	1.36331	0.174245	0.968899	1.91828	1.77864	0.0752992	neurological
593.1	Gross hematuria	LY6E	8	143017718	chr8:143017718:G:C	C	G	G	288	11610	ADD	5949	0.740926	0.168642	0.532386	1.03115	-1.77805	0.0753961	genitourinary
961.1	Poisoning/allergy of sulfonamides	LY6E	8	143017718	chr8:143017718:G:C	C	G	G	128	12966	ADD	6547	1.44458	0.206892	0.963018	2.16695	1.77782	0.0754329	injuries & poisonings
218	Benign neoplasm of uterus	DPP4	2	162073222	chr2:162073222:G:A	G	A	A	750	15076	ADD	7913	0.838102	0.0993485	0.689813	1.01827	-1.77773	0.0754476	neoplasms
079.9	Viremia, NOS	LY6E	8	143018292	chr8:143018292:C:A	C	A	A	164	12338	ADD	6251	1.46306	0.214055	0.96174	2.2257	1.77772	0.0754501	infectious diseases
704.2	Hirsutism	DPP4	2	162074215	chr2:162074215:T:G	G	T	T	106	15434	ADD	7770	1.4121	0.194152	0.965168	2.06599	1.77736	0.0755093	dermatologic
286.8	Hypercoagulable state	LY6E	8	143017718	chr8:143017718:G:C	C	G	G	104	13656	ADD	6880	1.48098	0.221023	0.960319	2.28395	1.77677	0.075606	hematopoietic
479	Other upper respiratory disease	DPP4	2	162074215	chr2:162074215:T:G	G	T	T	1008	10330	ADD	5669	0.880137	0.0718617	0.764507	1.01326	-1.77672	0.0756143	respiratory
240	Simple and unspecified goiter	LY6E	8	143017718	chr8:143017718:G:C	C	G	G	496	14014	ADD	7255	1.22528	0.114361	0.979247	1.53313	1.77658	0.0756367	endocrine/metabolic
327.41	Organic or persistent insomnia	DPP4	2	162073199	chr2:162073199:T:G	T	G	G	188	10772	ADD	5480	1.32326	0.157686	0.971454	1.80247	1.7763	0.075684	neurological
259	Other endocrine disorders	ACE2	X	15675734	chrX:15675734:C:T	C	T	T	68	14812	ADD	7440	0.683434	0.214385	0.448964	1.04036	-1.77542	0.0758282	endocrine/metabolic
480.3	Pneumonia due to fungus (mycoses)	TMPRSS2	21	41508701	chr21:41508701:T:G	G	T	T	44	13578	ADD	6811	2.28169	0.464683	0.917736	5.67277	1.77522	0.075861	respiratory
333	Extrapyramidal disease and abnormal movement disorders	ACE2	X	15674316	chrX:15674316:A:C	C	A	A	94	14406	ADD	7250	1.36253	0.174257	0.968317	1.91723	1.7752	0.0758641	neurological
333	Extrapyramidal disease and abnormal movement disorders	ACE2	X	15674699	chrX:15674699:T:C	C	T	T	94	14406	ADD	7250	1.36253	0.174257	0.968317	1.91723	1.7752	0.0758641	neurological
333	Extrapyramidal disease and abnormal movement disorders	ACE2	X	15675338	chrX:15675338:T:A	A	T	T	94	14406	ADD	7250	1.36253	0.174257	0.968317	1.91723	1.7752	0.0758641	neurological
415.21	Primary pulmonary hypertension	LY6E	8	143017718	chr8:143017718:G:C	C	G	G	336	14402	ADD	7369	0.758558	0.155665	0.559096	1.02918	-1.7752	0.0758643	circulatory system
588	Disorders resulting from impaired renal function	LY6E	8	143018261	chr8:143018261:G:A	G	A	A	410	10540	ADD	5475	0.165693	1.01321	0.0227436	1.20711	-1.77419	0.0760321	genitourinary
286.1	Congenital coagulation defects	DPP4	2	162074215	chr2:162074215:T:G	G	T	T	20	13656	ADD	6838	0.410157	0.502326	0.153239	1.09782	-1.77418	0.0760337	hematopoietic
189.11	Malignant neoplasm of kidney, except pelvis	TMPRSS2	21	41508700	chr21:41508700:G:A	G	A	A	318	17146	ADD	8732	0.234906	0.816496	0.0474123	1.16385	-1.77413	0.0760417	neoplasms
707.2	Chronic ulcer of leg or foot	ACE2	X	15674316	chrX:15674316:A:C	C	A	A	392	16708	ADD	8550	1.16892	0.088008	0.983717	1.38898	1.77343	0.0761577	dermatologic
707.2	Chronic ulcer of leg or foot	ACE2	X	15674699	chrX:15674699:T:C	C	T	T	392	16708	ADD	8550	1.16892	0.088008	0.983717	1.38898	1.77343	0.0761577	dermatologic
707.2	Chronic ulcer of leg or foot	ACE2	X	15675338	chrX:15675338:T:A	A	T	T	392	16708	ADD	8550	1.16892	0.088008	0.983717	1.38898	1.77343	0.0761577	dermatologic
618.1	Prolapse of vaginal walls	ACE2	X	15675244	chrX:15675244:A:G	G	A	A	114	17318	ADD	8716	1.40688	0.192511	0.9647	2.05174	1.77328	0.0761821	genitourinary
618.1	Prolapse of vaginal walls	ACE2	X	15674316	chrX:15674316:A:C	C	A	A	114	17318	ADD	8716	1.40685	0.192525	0.964647	2.05175	1.77301	0.0762265	genitourinary
618.1	Prolapse of vaginal walls	ACE2	X	15674699	chrX:15674699:T:C	C	T	T	114	17318	ADD	8716	1.40685	0.192525	0.964647	2.05175	1.77301	0.0762265	genitourinary
618.1	Prolapse of vaginal walls	ACE2	X	15675338	chrX:15675338:T:A	A	T	T	114	17318	ADD	8716	1.40685	0.192525	0.964647	2.05175	1.77301	0.0762265	genitourinary
590	Pyelonephritis	LY6E	8	143018292	chr8:143018292:C:A	C	A	A	334	11610	ADD	5972	1.32772	0.159911	0.970486	1.81644	1.77262	0.0762914	genitourinary
071.1	HIV infection, symptomatic	DPP4	2	162073469	chr2:162073469:A:G	A	G	G	536	12338	ADD	6437	1.19234	0.0992558	0.981555	1.4484	1.7724	0.0763288	infectious diseases
433.21	Cerebral artery occlusion, with cerebral infarction	DPP4	2	162074215	chr2:162074215:T:G	G	T	T	896	14764	ADD	7830	0.874719	0.0755284	0.75436	1.01428	-1.77222	0.0763586	circulatory system
527.7	Disturbance of salivary secretion	DPP4	2	162073199	chr2:162073199:T:G	T	G	G	150	16206	ADD	8178	1.36964	0.177543	0.96712	1.93968	1.77166	0.0764515	digestive
687.4	Disturbance of skin sensation	ACE2	X	15675734	chrX:15675734:C:T	C	T	T	2028	11128	ADD	6578	1.07946	0.0431664	0.991889	1.17476	1.7713	0.076511	dermatologic
743.11	Osteoporosis NOS	TMPRSS2	21	41508701	chr21:41508701:T:G	G	T	T	496	15886	ADD	8191	1.38872	0.185405	0.9656	1.99725	1.77116	0.0765343	musculoskeletal
132	Infestation (lice, mites)	LY6E	8	143018292	chr8:143018292:C:A	C	A	A	44	15752	ADD	7898	1.89976	0.362326	0.933867	3.86465	1.77113	0.0765399	infectious diseases
614.1	Pelvic peritoneal adhesions, female (postoperative) (postinfection)	LY6E	8	143017718	chr8:143017718:G:C	C	G	G	22	14548	ADD	7285	1.84137	0.344706	0.936974	3.61873	1.77111	0.0765429	genitourinary
721.8	Other allied disorders of spine	DPP4	2	162074215	chr2:162074215:T:G	G	T	T	16	13702	ADD	6859	1.79107	0.329171	0.939556	3.41432	1.77055	0.0766348	musculoskeletal
250.42	Other abnormal glucose	LY6E	8	143017718	chr8:143017718:G:C	C	G	G	2348	9124	ADD	5736	1.11246	0.060193	0.988661	1.25176	1.77052	0.076641	endocrine/metabolic
658	Maternal complication of pregnancy affecting fetus or newborn	TMPRSS2	21	41508700	chr21:41508700:G:A	G	A	A	10	17730	ADD	8870	3.57929	0.720509	0.871965	14.6925	1.76981	0.0767585	pregnancy complications
686.5	Pyoderma	LY6E	8	143018261	chr8:143018261:G:A	G	A	A	12	13750	ADD	6881	3.68136	0.736432	0.869273	15.5905	1.76972	0.076773	dermatologic
289.4	Lymphadenitis	TMPRSS2	21	41508700	chr21:41508700:G:A	G	A	A	696	13698	ADD	7197	0.506653	0.384302	0.238557	1.07604	-1.76926	0.0768511	hematopoietic
277.51	Lipoprotein disorders	LY6E	8	143018292	chr8:143018292:C:A	C	A	A	122	16250	ADD	8186	1.52712	0.239325	0.95534	2.4411	1.76906	0.0768834	endocrine/metabolic
681.2	Cellulitis and abscess of face/neck	DPP4	2	162074215	chr2:162074215:T:G	G	T	T	136	13750	ADD	6943	1.35244	0.170778	0.967725	1.8901	1.76786	0.0770845	dermatologic
189.2	Cancer of bladder	DPP4	2	162073199	chr2:162073199:T:G	T	G	G	130	17146	ADD	8638	0.687797	0.211706	0.45421	1.04151	-1.76784	0.0770883	neoplasms
352	Disorders of other cranial nerves	ACE2	X	15674766	chrX:15674766:C:G	C	G	G	126	14182	ADD	7154	1.31052	0.152973	0.971028	1.7687	1.76777	0.0770992	neurological
496.1	Emphysema	ACE2	X	15674316	chrX:15674316:A:C	C	A	A	578	11930	ADD	6254	0.863266	0.0831853	0.733393	1.01614	-1.76754	0.0771387	respiratory
496.1	Emphysema	ACE2	X	15674699	chrX:15674699:T:C	C	T	T	578	11930	ADD	6254	0.863266	0.0831853	0.733393	1.01614	-1.76754	0.0771387	respiratory
496.1	Emphysema	ACE2	X	15675338	chrX:15675338:T:A	A	T	T	578	11930	ADD	6254	0.863266	0.0831853	0.733393	1.01614	-1.76754	0.0771387	respiratory
530	Diseases of esophagus	DPP4	2	162073469	chr2:162073469:A:G	A	G	G	3752	9678	ADD	6715	0.920677	0.0467713	0.840032	1.00907	-1.76702	0.0772257	digestive
388	Other disorders of ear	DPP4	2	162073222	chr2:162073222:G:A	G	A	A	106	15556	ADD	7831	1.45269	0.211397	0.959908	2.19843	1.76641	0.0773278	sense organs
394.3	Aortic valve disease	ACE2	X	15674316	chrX:15674316:A:C	C	A	A	18	14322	ADD	7170	0.374863	0.555523	0.126186	1.11361	-1.76626	0.077353	circulatory system
394.3	Aortic valve disease	ACE2	X	15674699	chrX:15674699:T:C	C	T	T	18	14322	ADD	7170	0.374863	0.555523	0.126186	1.11361	-1.76626	0.077353	circulatory system
394.3	Aortic valve disease	ACE2	X	15675244	chrX:15675244:A:G	G	A	A	18	14322	ADD	7170	0.374863	0.555523	0.126186	1.11361	-1.76626	0.077353	circulatory system
394.3	Aortic valve disease	ACE2	X	15675338	chrX:15675338:T:A	A	T	T	18	14322	ADD	7170	0.374863	0.555523	0.126186	1.11361	-1.76626	0.077353	circulatory system
317.1	Alcoholism	LY6E	8	143018261	chr8:143018261:G:A	G	A	A	628	10372	ADD	5500	0.353068	0.589611	0.111168	1.12134	-1.76573	0.0774415	mental disorders
619.1	Noninflammatory disorders of ovary, fallopian tube, and broad ligament	DPP4	2	162073222	chr2:162073222:G:A	G	A	A	68	14484	ADD	7276	1.57073	0.255738	0.951515	2.5929	1.76562	0.077459	genitourinary
297	Suicidal ideation or attempt	LY6E	8	143018261	chr8:143018261:G:A	G	A	A	106	7042	ADD	3574	2.46508	0.511212	0.905082	6.71392	1.76488	0.0775842	mental disorders
609.2	Abnormal spermatozoa	LY6E	8	143018261	chr8:143018261:G:A	G	A	A	22	14468	ADD	7245	3.88725	0.769368	0.860508	17.5602	1.7647	0.0776148	genitourinary
605	Erectile dysfunction [ED]	ACE2	X	15674316	chrX:15674316:A:C	C	A	A	1528	14468	ADD	7998	0.914788	0.0504951	0.828588	1.00995	-1.7638	0.0777659	genitourinary
605	Erectile dysfunction [ED]	ACE2	X	15674699	chrX:15674699:T:C	C	T	T	1528	14468	ADD	7998	0.914788	0.0504951	0.828588	1.00995	-1.7638	0.0777659	genitourinary
605	Erectile dysfunction [ED]	ACE2	X	15675338	chrX:15675338:T:A	A	T	T	1528	14468	ADD	7998	0.914788	0.0504951	0.828588	1.00995	-1.7638	0.0777659	genitourinary
531.1	Hemorrhage from gastrointestinal ulcer	ACE2	X	15674316	chrX:15674316:A:C	C	A	A	66	16886	ADD	8476	0.635168	0.257342	0.383565	1.05181	-1.76367	0.0777876	digestive
531.1	Hemorrhage from gastrointestinal ulcer	ACE2	X	15674699	chrX:15674699:T:C	C	T	T	66	16886	ADD	8476	0.635168	0.257342	0.383565	1.05181	-1.76367	0.0777876	digestive
531.1	Hemorrhage from gastrointestinal ulcer	ACE2	X	15675338	chrX:15675338:T:A	A	T	T	66	16886	ADD	8476	0.635168	0.257342	0.383565	1.05181	-1.76367	0.0777876	digestive
350.3	Lack of coordination	LY6E	8	143018261	chr8:143018261:G:A	G	A	A	60	14758	ADD	7409	2.96341	0.615968	0.886092	9.9107	1.76363	0.0777941	neurological
604.1	Redundant prepuce and phimosis/BXO	LY6E	8	143018261	chr8:143018261:G:A	G	A	A	24	14468	ADD	7246	3.74001	0.748032	0.86327	16.2031	1.76341	0.0778312	genitourinary
965.1	Opiates and related narcotics causing adverse effects in therapeutic use	LY6E	8	143018292	chr8:143018292:C:A	C	A	A	212	12966	ADD	6589	1.41383	0.196405	0.96209	2.07766	1.76319	0.0778682	injuries & poisonings
155.1	Malignant neoplasm of liver, primary	DPP4	2	162074215	chr2:162074215:T:G	G	T	T	132	16170	ADD	8151	1.35863	0.173836	0.966345	1.91017	1.76303	0.0778952	neoplasms
478	Throat pain	TMPRSS2	21	41508700	chr21:41508700:G:A	G	A	A	318	10330	ADD	5324	0.170321	1.00404	0.0238028	1.21873	-1.76295	0.0779088	respiratory
626.12	Excessive or frequent menstruation	LY6E	8	143017718	chr8:143017718:G:C	C	G	G	794	12686	ADD	6740	1.1852	0.096404	0.981141	1.43169	1.76247	0.0779904	genitourinary
071	Human immunodeficiency virus [HIV] disease	DPP4	2	162073469	chr2:162073469:A:G	A	G	G	552	12338	ADD	6445	1.18792	0.0977267	0.980849	1.43871	1.7621	0.0780529	infectious diseases
531.1	Hemorrhage from gastrointestinal ulcer	ACE2	X	15675244	chrX:15675244:A:G	G	A	A	66	16886	ADD	8476	0.635462	0.257378	0.383715	1.05238	-1.76162	0.0781338	digestive
737.3	Kyphoscoliosis and scoliosis	TMPRSS2	21	41508701	chr21:41508701:T:G	G	T	T	90	15480	ADD	7785	1.86424	0.353587	0.932244	3.728	1.76154	0.0781475	musculoskeletal
149.9	Cancer of of nasal cavities	ACE2	X	15674766	chrX:15674766:C:G	C	G	G	18	17514	ADD	8766	1.89306	0.362475	0.930306	3.85216	1.76066	0.0782956	neoplasms
352	Disorders of other cranial nerves	ACE2	X	15675734	chrX:15675734:C:T	C	T	T	126	14182	ADD	7154	1.30742	0.152253	0.970102	1.76203	1.76059	0.078307	neurological
800.1	Fracture of neck of femur	ACE2	X	15674766	chrX:15674766:C:G	C	G	G	48	15624	ADD	7836	1.48087	0.223017	0.956499	2.29271	1.76054	0.0783166	injuries & poisonings
426.8	Other cardiac conduction disorders	TMPRSS2	21	41508701	chr21:41508701:T:G	G	T	T	128	8980	ADD	4554	1.70927	0.304572	0.940932	3.10501	1.76006	0.0783973	circulatory system
250.4	Abnormal glucose	LY6E	8	143018292	chr8:143018292:C:A	C	A	A	1884	9124	ADD	5504	0.85934	0.0861332	0.725852	1.01738	-1.75995	0.0784157	endocrine/metabolic
302	Sexual and gender identity disorders	DPP4	2	162073222	chr2:162073222:G:A	G	A	A	68	7042	ADD	3555	1.58993	0.263518	0.948575	2.66493	1.75962	0.0784726	mental disorders
246.2	Thyroid cyst	DPP4	2	162074215	chr2:162074215:T:G	G	T	T	16	14014	ADD	7015	1.97494	0.386921	0.925136	4.216	1.75885	0.0786028	endocrine/metabolic
771.1	Swelling of limb	ACE2	X	15675734	chrX:15675734:C:T	C	T	T	1490	12886	ADD	7188	1.08729	0.0475839	0.990472	1.19357	1.75876	0.0786174	symptoms
587	Kidney replaced by transpant	ACE2	X	15675734	chrX:15675734:C:T	C	T	T	708	10540	ADD	5624	1.11754	0.0631888	0.987361	1.26488	1.75867	0.0786343	genitourinary
696	Psoriasis and related disorders	DPP4	2	162073199	chr2:162073199:T:G	T	G	G	132	13140	ADD	6636	1.40056	0.191628	0.962028	2.03899	1.75795	0.0787562	dermatologic
496.1	Emphysema	ACE2	X	15675244	chrX:15675244:A:G	G	A	A	578	11930	ADD	6254	0.863944	0.083196	0.733954	1.01696	-1.75787	0.0787698	respiratory
740.9	Osteoarthrosis NOS	DPP4	2	162073222	chr2:162073222:G:A	G	A	A	2110	11812	ADD	6961	0.892554	0.0646986	0.786254	1.01323	-1.75689	0.0789361	musculoskeletal
250.41	Impaired fasting glucose	DPP4	2	162074215	chr2:162074215:T:G	G	T	T	532	9124	ADD	4828	1.17699	0.0927625	0.981325	1.41167	1.75674	0.0789615	endocrine/metabolic
189.1	Cancer of kidney and renal pelvis	LY6E	8	143017718	chr8:143017718:G:C	C	G	G	256	17146	ADD	8701	0.731648	0.177862	0.516304	1.03681	-1.75674	0.0789627	neoplasms
451.2	Phlebitis and thrombophlebitis of lower extremities	ACE2	X	15675734	chrX:15675734:C:T	C	T	T	110	11138	ADD	5624	0.758672	0.157235	0.557461	1.03251	-1.75651	0.0790008	circulatory system
250.12	Type 1 diabetes with renal manifestations	DPP4	2	162073199	chr2:162073199:T:G	T	G	G	112	9124	ADD	4618	0.642142	0.252242	0.391672	1.05279	-1.75603	0.079083	endocrine/metabolic
365.11	Primary open angle glaucoma	DPP4	2	162073222	chr2:162073222:G:A	G	A	A	498	14542	ADD	7520	1.21889	0.112724	0.977269	1.52025	1.75599	0.0790906	sense organs
110.11	Dermatophytosis of nail	ACE2	X	15674766	chrX:15674766:C:G	C	G	G	492	12868	ADD	6680	0.873899	0.0767681	0.751824	1.0158	-1.75582	0.0791195	infectious diseases
635	Hemorrhage during pregnancy; childbirth and postpartum	ACE2	X	15675734	chrX:15675734:C:T	C	T	T	150	16082	ADD	8116	1.24046	0.122772	0.975165	1.57792	1.75513	0.0792377	pregnancy complications
427.12	Paroxysmal ventricular tachycardia	DPP4	2	162073199	chr2:162073199:T:G	T	G	G	910	8980	ADD	4945	1.15829	0.0837357	0.982971	1.36487	1.75485	0.0792857	circulatory system
202.2	Non-Hodgkins lymphoma	ACE2	X	15675734	chrX:15675734:C:T	C	T	T	148	17048	ADD	8598	1.27425	0.13814	0.972009	1.67048	1.75445	0.0793541	neoplasms
282.8	Other hemoglobinopathies	LY6E	8	143018261	chr8:143018261:G:A	G	A	A	156	8724	ADD	4440	2.31698	0.479439	0.905364	5.92956	1.7526	0.0796704	hematopoietic
250.24	Type 2 diabetes with neurological manifestations	ACE2	X	15674766	chrX:15674766:C:G	C	G	G	960	9124	ADD	5042	1.10935	0.05923	0.987762	1.24591	1.75208	0.0797608	endocrine/metabolic
726.2	Synoviopathy	LY6E	8	143017718	chr8:143017718:G:C	C	G	G	138	11508	ADD	5823	1.41587	0.198581	0.959384	2.08957	1.75116	0.0799178	musculoskeletal
201	Hodgkin's disease	DPP4	2	162073222	chr2:162073222:G:A	G	A	A	70	17048	ADD	8559	0.567466	0.323621	0.300935	1.07005	-1.75074	0.079991	neoplasms
726.4	Calcaneal spur; Exostosis NOS	DPP4	2	162073222	chr2:162073222:G:A	G	A	A	70	11508	ADD	5789	0.540183	0.351825	0.271061	1.0765	-1.75044	0.0800427	musculoskeletal
255.2	Adrenal hypofunction	LY6E	8	143017718	chr8:143017718:G:C	C	G	G	42	14812	ADD	7427	1.75802	0.322482	0.934389	3.30767	1.74953	0.0802001	endocrine/metabolic
714.1	Rheumatoid arthritis	DPP4	2	162073199	chr2:162073199:T:G	T	G	G	436	14934	ADD	7685	0.804004	0.124729	0.629635	1.02666	-1.74901	0.0802901	musculoskeletal
614.51	Cervicitis and endocervicitis	TMPRSS2	21	41508700	chr21:41508700:G:A	G	A	A	32	14548	ADD	7290	2.8002	0.588808	0.883068	8.87938	1.74877	0.0803308	genitourinary
278	Overweight, obesity and other hyperalimentation	DPP4	2	162073222	chr2:162073222:G:A	G	A	A	5330	8180	ADD	6755	0.92436	0.0449817	0.846355	1.00955	-1.74857	0.0803655	endocrine/metabolic
763	Thoracic or lumbosacral neuritis or radiculitis, unspecified	ACE2	X	15674316	chrX:15674316:A:C	C	A	A	1076	13410	ADD	7243	0.896815	0.0622964	0.793736	1.01328	-1.74819	0.0804308	symptoms
763	Thoracic or lumbosacral neuritis or radiculitis, unspecified	ACE2	X	15674699	chrX:15674699:T:C	C	T	T	1076	13410	ADD	7243	0.896815	0.0622964	0.793736	1.01328	-1.74819	0.0804308	symptoms
763	Thoracic or lumbosacral neuritis or radiculitis, unspecified	ACE2	X	15675338	chrX:15675338:T:A	A	T	T	1076	13410	ADD	7243	0.896815	0.0622964	0.793736	1.01328	-1.74819	0.0804308	symptoms
722.7	Intervertebral disc disorder with myelopathy	DPP4	2	162073222	chr2:162073222:G:A	G	A	A	72	13702	ADD	6887	1.55707	0.253476	0.947435	2.55898	1.74694	0.0806482	musculoskeletal
498	Acute bronchospasm	TMPRSS2	21	41508701	chr21:41508701:T:G	G	T	T	38	11930	ADD	5984	2.24598	0.463223	0.905963	5.56805	1.74677	0.0806774	respiratory
401.3	Other hypertensive complications	ACE2	X	15675734	chrX:15675734:C:T	C	T	T	846	5666	ADD	3256	1.12262	0.0662501	0.985919	1.27828	1.74591	0.0808262	circulatory system
369.5	Conjunctivitis, infectious	LY6E	8	143017718	chr8:143017718:G:C	C	G	G	298	14556	ADD	7427	1.28448	0.143423	0.969718	1.70141	1.74556	0.080887	sense organs
443.8	Other specified peripheral vascular diseases	ACE2	X	15675734	chrX:15675734:C:T	C	T	T	22	14400	ADD	7211	0.628818	0.265882	0.373427	1.05887	-1.74481	0.081018	circulatory system
561.2	Flatulence	LY6E	8	143017718	chr8:143017718:G:C	C	G	G	300	17050	ADD	8675	0.748465	0.166083	0.540507	1.03643	-1.74449	0.0810731	digestive
529.1	Glossitis	LY6E	8	143018261	chr8:143018261:G:A	G	A	A	12	16206	ADD	8109	3.57049	0.729597	0.854464	14.9198	1.74439	0.0810909	digestive
573.2	Liver replaced by transplant	TMPRSS2	21	41508701	chr21:41508701:T:G	G	T	T	140	14022	ADD	7081	1.70401	0.305588	0.936171	3.10162	1.74413	0.081137	digestive
349	Other and unspecified disorders of the nervous system	DPP4	2	162073469	chr2:162073469:A:G	A	G	G	54	14406	ADD	7230	0.54195	0.351758	0.271983	1.07988	-1.74149	0.0815985	neurological
614	Inflammatory diseases of female pelvic organs	DPP4	2	162073469	chr2:162073469:A:G	A	G	G	1146	14548	ADD	7847	0.876008	0.0760463	0.754705	1.01681	-1.74079	0.0817209	genitourinary
760	Back pain	LY6E	8	143018292	chr8:143018292:C:A	C	A	A	4894	10326	ADD	7610	0.905842	0.0568176	0.810381	1.01255	-1.74048	0.081774	symptoms
259	Other endocrine disorders	DPP4	2	162074215	chr2:162074215:T:G	G	T	T	68	14812	ADD	7440	1.50194	0.233793	0.94983	2.37496	1.7398	0.0818937	endocrine/metabolic
938	Dermatitis due to solar radiation	DPP4	2	162074215	chr2:162074215:T:G	G	T	T	44	12656	ADD	6350	1.63232	0.281642	0.939876	2.8349	1.7398	0.0818944	dermatologic
224.1	Benign neoplasm of eye, uveal	DPP4	2	162073469	chr2:162073469:A:G	A	G	G	28	17442	ADD	8735	1.50401	0.234607	0.94963	2.38204	1.73967	0.081917	neoplasms
327.3	Sleep apnea	LY6E	8	143018292	chr8:143018292:C:A	C	A	A	2812	10772	ADD	6792	1.12278	0.0665744	0.985435	1.27928	1.73958	0.0819322	neurological
285.22	Anemia in neoplastic disease	LY6E	8	143017718	chr8:143017718:G:C	C	G	G	96	8724	ADD	4410	1.48888	0.228822	0.950792	2.33149	1.73945	0.0819564	hematopoietic
763	Thoracic or lumbosacral neuritis or radiculitis, unspecified	ACE2	X	15675244	chrX:15675244:A:G	G	A	A	1076	13410	ADD	7243	0.897302	0.0623019	0.794158	1.01384	-1.73932	0.0819787	symptoms
465.2	Acute pharyngitis	DPP4	2	162074215	chr2:162074215:T:G	G	T	T	582	11522	ADD	6052	0.849291	0.0939195	0.706499	1.02094	-1.7393	0.0819826	respiratory
428.1	Congestive heart failure (CHF) NOS	LY6E	8	143018292	chr8:143018292:C:A	C	A	A	2446	12776	ADD	7611	1.13051	0.0705274	0.984556	1.2981	1.73928	0.0819853	circulatory system
291.8	Alteration of consciousness	DPP4	2	162073199	chr2:162073199:T:G	T	G	G	156	14340	ADD	7248	0.693873	0.21014	0.45963	1.04749	-1.73915	0.0820075	mental disorders
286.13	Congenital factor VIII disorder	DPP4	2	162073469	chr2:162073469:A:G	A	G	G	6	13656	ADD	6831	2.0101	0.401469	0.915138	4.41518	1.73907	0.0820219	hematopoietic
134	Helminthiases	TMPRSS2	21	41508700	chr21:41508700:G:A	G	A	A	6	15752	ADD	7879	3.53023	0.725545	0.851565	14.6348	1.7385	0.082122	infectious diseases
1004	Other signs and symptoms involving emotional state	TMPRSS2	21	41508700	chr21:41508700:G:A	G	A	A	46	17578	ADD	8812	2.89648	0.611734	0.873297	9.60683	1.7385	0.0821235	NULL
440.2	Atherosclerosis of the extremities	DPP4	2	162073199	chr2:162073199:T:G	T	G	G	286	14400	ADD	7343	1.24572	0.126385	0.972392	1.59588	1.73845	0.0821324	circulatory system
579.8	Nonspecific abnormal findings in stool contents	DPP4	2	162073199	chr2:162073199:T:G	T	G	G	118	14128	ADD	7123	1.37793	0.184466	0.959866	1.97809	1.73791	0.0822264	digestive
984	Toxic effect of lead and its compounds (including fumes)	LY6E	8	143018261	chr8:143018261:G:A	G	A	A	20	16980	ADD	8500	3.70611	0.753942	0.845593	16.2433	1.73751	0.0822971	injuries & poisonings
695.9	Unspecified erythematous condition	LY6E	8	143017718	chr8:143017718:G:C	C	G	G	106	13610	ADD	6858	1.47119	0.222237	0.951702	2.27425	1.73722	0.0823492	dermatologic
527.2	Sialoadenitis	DPP4	2	162073222	chr2:162073222:G:A	G	A	A	82	16206	ADD	8144	1.50993	0.237229	0.948479	2.40374	1.73699	0.0823884	digestive
204.12	Lymphoid leukemia, chronic	LY6E	8	143017718	chr8:143017718:G:C	C	G	G	26	17048	ADD	8537	1.92059	0.375749	0.919595	4.01119	1.73688	0.0824076	neoplasms
782.3	Edema	LY6E	8	143017718	chr8:143017718:G:C	C	G	G	2588	13066	ADD	7827	1.10341	0.0566562	0.98744	1.233	1.73687	0.0824094	symptoms
605	Erectile dysfunction [ED]	ACE2	X	15675244	chrX:15675244:A:G	G	A	A	1528	14468	ADD	7998	0.915929	0.0505671	0.829505	1.01136	-1.73664	0.0824514	genitourinary
395.4	Nonrheumatic pulmonary valve disorders	DPP4	2	162074215	chr2:162074215:T:G	G	T	T	28	14322	ADD	7175	0.482577	0.419609	0.212029	1.09834	-1.73641	0.0824907	circulatory system
686.1	Carbuncle and furuncle	ACE2	X	15674316	chrX:15674316:A:C	C	A	A	256	13750	ADD	7003	0.795005	0.132179	0.613562	1.0301	-1.73557	0.0826396	dermatologic
686.1	Carbuncle and furuncle	ACE2	X	15674699	chrX:15674699:T:C	C	T	T	256	13750	ADD	7003	0.795005	0.132179	0.613562	1.0301	-1.73557	0.0826396	dermatologic
686.1	Carbuncle and furuncle	ACE2	X	15675338	chrX:15675338:T:A	A	T	T	256	13750	ADD	7003	0.795005	0.132179	0.613562	1.0301	-1.73557	0.0826396	dermatologic
292.4	Altered mental status	LY6E	8	143017718	chr8:143017718:G:C	C	G	G	408	14340	ADD	7374	1.24006	0.123982	0.972542	1.58116	1.73539	0.0826709	mental disorders
281.11	Pernicious anemia	DPP4	2	162074215	chr2:162074215:T:G	G	T	T	52	8724	ADD	4388	0.583038	0.310902	0.316998	1.07235	-1.73529	0.0826899	hematopoietic
480.5	Bronchopneumonia and lung abscess	TMPRSS2	21	41508701	chr21:41508701:T:G	G	T	T	24	13578	ADD	6801	2.44463	0.515136	0.890695	6.70962	1.73526	0.0826947	respiratory
433.11	Occlusion of cerebral arteries, with cerebral infarction	ACE2	X	15675244	chrX:15675244:A:G	G	A	A	106	14764	ADD	7435	1.31908	0.159602	0.964755	1.80354	1.73515	0.0827142	circulatory system
807	Fracture of ribs	ACE2	X	15675734	chrX:15675734:C:T	C	T	T	102	15624	ADD	7863	1.32571	0.162517	0.964079	1.82298	1.73487	0.082764	injuries & poisonings
302	Sexual and gender identity disorders	LY6E	8	143018292	chr8:143018292:C:A	C	A	A	68	7042	ADD	3555	1.70757	0.308483	0.932821	3.12579	1.73453	0.0828241	mental disorders
638	Other high-risk pregnancy	DPP4	2	162073222	chr2:162073222:G:A	G	A	A	882	16678	ADD	8780	1.17998	0.0954246	0.978701	1.42266	1.73435	0.0828554	pregnancy complications
500.1	Extrinsic allergic alveolitis	DPP4	2	162073222	chr2:162073222:G:A	G	A	A	8	14020	ADD	7014	2.26731	0.472019	0.898932	5.71866	1.73424	0.0828761	respiratory
250.21	Type 2 diabetes with ketoacidosis	DPP4	2	162073222	chr2:162073222:G:A	G	A	A	104	9124	ADD	4614	0.647419	0.250749	0.396047	1.05834	-1.73385	0.0829444	endocrine/metabolic
793.2	Nonspecific abnormal findings on radiological and other examination of other intrathoracic organs (echocardiogram, etc)	ACE2	X	15675244	chrX:15675244:A:G	G	A	A	282	17012	ADD	8647	1.2118	0.110802	0.975254	1.50573	1.73382	0.0829502	symptoms
854	Complications of cardiac/vascular device, implant, and graft	LY6E	8	143017718	chr8:143017718:G:C	C	G	G	720	14420	ADD	7570	1.17724	0.0941238	0.978921	1.41574	1.73362	0.082986	injuries & poisonings
758	Chromosomal anomalies and genetic disorders	ACE2	X	15674316	chrX:15674316:A:C	C	A	A	16	17180	ADD	8598	1.66806	0.295219	0.935235	2.9751	1.73316	0.0830679	congenital anomalies
758	Chromosomal anomalies and genetic disorders	ACE2	X	15674699	chrX:15674699:T:C	C	T	T	16	17180	ADD	8598	1.66806	0.295219	0.935235	2.9751	1.73316	0.0830679	congenital anomalies
758	Chromosomal anomalies and genetic disorders	ACE2	X	15675338	chrX:15675338:T:A	A	T	T	16	17180	ADD	8598	1.66806	0.295219	0.935235	2.9751	1.73316	0.0830679	congenital anomalies
686.1	Carbuncle and furuncle	ACE2	X	15675244	chrX:15675244:A:G	G	A	A	256	13750	ADD	7003	0.79525	0.132186	0.613743	1.03044	-1.73315	0.083069	dermatologic
722.7	Intervertebral disc disorder with myelopathy	ACE2	X	15674316	chrX:15674316:A:C	C	A	A	72	13702	ADD	6887	0.637923	0.25938	0.383693	1.0606	-1.73313	0.0830731	musculoskeletal
722.7	Intervertebral disc disorder with myelopathy	ACE2	X	15674699	chrX:15674699:T:C	C	T	T	72	13702	ADD	6887	0.637923	0.25938	0.383693	1.0606	-1.73313	0.0830731	musculoskeletal
722.7	Intervertebral disc disorder with myelopathy	ACE2	X	15675338	chrX:15675338:T:A	A	T	T	72	13702	ADD	6887	0.637923	0.25938	0.383693	1.0606	-1.73313	0.0830731	musculoskeletal
550.2	Diaphragmatic hernia	LY6E	8	143018261	chr8:143018261:G:A	G	A	A	414	14972	ADD	7693	0.175194	1.00538	0.0244196	1.2569	-1.73254	0.0831776	digestive
916	NA	ACE2	X	15675734	chrX:15675734:C:T	C	T	T	840	15362	ADD	8101	1.11684	0.0637897	0.985583	1.26558	1.73231	0.0832185	NA
191	Manlignant and unknown neoplasms of brain and nervous system	DPP4	2	162073222	chr2:162073222:G:A	G	A	A	54	17442	ADD	8748	0.504281	0.395212	0.232417	1.09415	-1.73229	0.0832224	neoplasms
758	Chromosomal anomalies and genetic disorders	ACE2	X	15675244	chrX:15675244:A:G	G	A	A	16	17180	ADD	8598	1.66684	0.294985	0.93498	2.97156	1.73205	0.0832643	congenital anomalies
555.21	Ulcerative colitis (chronic)	ACE2	X	15675244	chrX:15675244:A:G	G	A	A	46	12050	ADD	6048	1.5394	0.249093	0.944766	2.50831	1.73186	0.083298	digestive
722.7	Intervertebral disc disorder with myelopathy	ACE2	X	15675244	chrX:15675244:A:G	G	A	A	72	13702	ADD	6887	0.638267	0.259398	0.383886	1.06121	-1.73093	0.0834651	musculoskeletal
433.11	Occlusion of cerebral arteries, with cerebral infarction	ACE2	X	15674316	chrX:15674316:A:C	C	A	A	106	14764	ADD	7435	1.31823	0.159624	0.964096	1.80246	1.7309	0.0834703	circulatory system
433.11	Occlusion of cerebral arteries, with cerebral infarction	ACE2	X	15674699	chrX:15674699:T:C	C	T	T	106	14764	ADD	7435	1.31823	0.159624	0.964096	1.80246	1.7309	0.0834703	circulatory system
433.11	Occlusion of cerebral arteries, with cerebral infarction	ACE2	X	15675338	chrX:15675338:T:A	A	T	T	106	14764	ADD	7435	1.31823	0.159624	0.964096	1.80246	1.7309	0.0834703	circulatory system
752	Nervous system congenital anomalies	DPP4	2	162073199	chr2:162073199:T:G	T	G	G	32	17474	ADD	8753	0.412106	0.512363	0.150968	1.12495	-1.73017	0.0836002	congenital anomalies
793.2	Nonspecific abnormal findings on radiological and other examination of other intrathoracic organs (echocardiogram, etc)	ACE2	X	15674316	chrX:15674316:A:C	C	A	A	282	17012	ADD	8647	1.2113	0.110798	0.974854	1.50509	1.73011	0.083611	symptoms
793.2	Nonspecific abnormal findings on radiological and other examination of other intrathoracic organs (echocardiogram, etc)	ACE2	X	15674699	chrX:15674699:T:C	C	T	T	282	17012	ADD	8647	1.2113	0.110798	0.974854	1.50509	1.73011	0.083611	symptoms
793.2	Nonspecific abnormal findings on radiological and other examination of other intrathoracic organs (echocardiogram, etc)	ACE2	X	15675338	chrX:15675338:T:A	A	T	T	282	17012	ADD	8647	1.2113	0.110798	0.974854	1.50509	1.73011	0.083611	symptoms
555.21	Ulcerative colitis (chronic)	ACE2	X	15674316	chrX:15674316:A:C	C	A	A	46	12050	ADD	6048	1.53879	0.249145	0.944293	2.50757	1.7299	0.083648	digestive
555.21	Ulcerative colitis (chronic)	ACE2	X	15674699	chrX:15674699:T:C	C	T	T	46	12050	ADD	6048	1.53879	0.249145	0.944293	2.50757	1.7299	0.083648	digestive
555.21	Ulcerative colitis (chronic)	ACE2	X	15675338	chrX:15675338:T:A	A	T	T	46	12050	ADD	6048	1.53879	0.249145	0.944293	2.50757	1.7299	0.083648	digestive
796	Elevated prostate specific antigen [PSA]	LY6E	8	143017718	chr8:143017718:G:C	C	G	G	702	15234	ADD	7968	0.815995	0.117556	0.648073	1.02743	-1.7298	0.0836668	genitourinary
574.11	Cholelithiasis with acute cholecystitis	DPP4	2	162073199	chr2:162073199:T:G	T	G	G	26	16340	ADD	8183	0.36341	0.585177	0.115423	1.14419	-1.72978	0.0836704	digestive
800.4	Fracture of patella	DPP4	2	162073199	chr2:162073199:T:G	T	G	G	22	15624	ADD	7823	0.438641	0.476418	0.172418	1.11593	-1.72973	0.083679	injuries & poisonings
415.1	Acute pulmonary heart disease	DPP4	2	162073469	chr2:162073469:A:G	A	G	G	392	14402	ADD	7397	1.2162	0.113161	0.974277	1.5182	1.72968	0.0836881	circulatory system
571.5	Other chronic nonalcoholic liver disease	DPP4	2	162073199	chr2:162073199:T:G	T	G	G	764	14022	ADD	7393	1.16087	0.0862551	0.980312	1.37469	1.72944	0.0837307	digestive
977	Personal history of allergy to medicinal agents	DPP4	2	162074215	chr2:162074215:T:G	G	T	T	324	12966	ADD	6645	1.22389	0.116872	0.97333	1.53894	1.72866	0.0838695	injuries & poisonings
401.21	Hypertensive heart disease	LY6E	8	143017718	chr8:143017718:G:C	C	G	G	906	5666	ADD	3286	0.826231	0.110424	0.665439	1.02588	-1.72861	0.0838783	circulatory system
369	Infection of the eye	ACE2	X	15674766	chrX:15674766:C:G	C	G	G	240	14556	ADD	7398	0.817436	0.116627	0.6504	1.02737	-1.72844	0.0839092	sense organs
253.7	Other disorders of neurohypophysis	DPP4	2	162073222	chr2:162073222:G:A	G	A	A	22	14812	ADD	7417	1.9846	0.396584	0.912223	4.31764	1.72831	0.0839331	endocrine/metabolic
251.1	Hypoglycemia	ACE2	X	15674316	chrX:15674316:A:C	C	A	A	220	8180	ADD	4200	1.23724	0.123204	0.971813	1.57516	1.72789	0.0840078	endocrine/metabolic
251.1	Hypoglycemia	ACE2	X	15674699	chrX:15674699:T:C	C	T	T	220	8180	ADD	4200	1.23724	0.123204	0.971813	1.57516	1.72789	0.0840078	endocrine/metabolic
251.1	Hypoglycemia	ACE2	X	15675244	chrX:15675244:A:G	G	A	A	220	8180	ADD	4200	1.23724	0.123204	0.971813	1.57516	1.72789	0.0840078	endocrine/metabolic
251.1	Hypoglycemia	ACE2	X	15675338	chrX:15675338:T:A	A	T	T	220	8180	ADD	4200	1.23724	0.123204	0.971813	1.57516	1.72789	0.0840078	endocrine/metabolic
619.5	Noninflammatory disorders of vulva and perineum	LY6E	8	143017718	chr8:143017718:G:C	C	G	G	98	14484	ADD	7291	1.49494	0.232759	0.947327	2.35912	1.72749	0.0840799	genitourinary
724.8	Other symptoms referable to back	DPP4	2	162073222	chr2:162073222:G:A	G	A	A	152	13702	ADD	6927	1.37108	0.182708	0.958392	1.96149	1.72736	0.084103	musculoskeletal
512.1	Wheezing	LY6E	8	143018261	chr8:143018261:G:A	G	A	A	470	7326	ADD	3898	0.287645	0.721526	0.0699347	1.1831	-1.72694	0.0841793	respiratory
276.13	Hyperpotassemia	TMPRSS2	21	41508700	chr21:41508700:G:A	G	A	A	1042	11046	ADD	6044	0.580395	0.315043	0.31301	1.07619	-1.7269	0.0841862	endocrine/metabolic
568	Other disorders of peritoneum	DPP4	2	162073199	chr2:162073199:T:G	T	G	G	62	14840	ADD	7451	1.56679	0.260056	0.941134	2.60838	1.72667	0.0842274	digestive
250.22	Type 2 diabetes with renal manifestations	LY6E	8	143017718	chr8:143017718:G:C	C	G	G	1484	9124	ADD	5304	1.13714	0.0744847	0.982683	1.31588	1.72544	0.0844482	endocrine/metabolic
981	Toxic effect of (non-ethyl) alcohol and petroleum and other solvents	TMPRSS2	21	41508700	chr21:41508700:G:A	G	A	A	6	16980	ADD	8493	3.50456	0.726832	0.843244	14.5651	1.72539	0.084458	injuries & poisonings
772.1	Muscular wasting and disuse atrophy	TMPRSS2	21	41508701	chr21:41508701:T:G	G	T	T	112	14980	ADD	7546	1.77282	0.33187	0.925074	3.39744	1.72529	0.0844757	symptoms
255.21	Glucocorticoid deficiency	ACE2	X	15674316	chrX:15674316:A:C	C	A	A	102	14812	ADD	7457	1.34132	0.170229	0.960798	1.87254	1.72504	0.0845208	endocrine/metabolic
255.21	Glucocorticoid deficiency	ACE2	X	15674699	chrX:15674699:T:C	C	T	T	102	14812	ADD	7457	1.34132	0.170229	0.960798	1.87254	1.72504	0.0845208	endocrine/metabolic
255.21	Glucocorticoid deficiency	ACE2	X	15675244	chrX:15675244:A:G	G	A	A	102	14812	ADD	7457	1.34132	0.170229	0.960798	1.87254	1.72504	0.0845208	endocrine/metabolic
255.21	Glucocorticoid deficiency	ACE2	X	15675338	chrX:15675338:T:A	A	T	T	102	14812	ADD	7457	1.34132	0.170229	0.960798	1.87254	1.72504	0.0845208	endocrine/metabolic
615	Endometriosis	DPP4	2	162073199	chr2:162073199:T:G	T	G	G	276	14548	ADD	7412	0.785986	0.139668	0.597764	1.03348	-1.7242	0.0846713	genitourinary
709	Diffuse diseases of connective tissue	LY6E	8	143017718	chr8:143017718:G:C	C	G	G	246	13458	ADD	6852	0.725443	0.186167	0.503661	1.04489	-1.72411	0.0846881	dermatologic
712	Infective connective tissue disorders	LY6E	8	143018261	chr8:143018261:G:A	G	A	A	22	14484	ADD	7253	3.75935	0.768365	0.833833	16.9491	1.72346	0.0848056	musculoskeletal
300.12	Agorophobia, social phobia, and panic disorder	ACE2	X	15674316	chrX:15674316:A:C	C	A	A	262	7042	ADD	3652	0.787148	0.138931	0.599513	1.03351	-1.72272	0.0849392	mental disorders
300.12	Agorophobia, social phobia, and panic disorder	ACE2	X	15674699	chrX:15674699:T:C	C	T	T	262	7042	ADD	3652	0.787148	0.138931	0.599513	1.03351	-1.72272	0.0849392	mental disorders
300.12	Agorophobia, social phobia, and panic disorder	ACE2	X	15675244	chrX:15675244:A:G	G	A	A	262	7042	ADD	3652	0.787148	0.138931	0.599513	1.03351	-1.72272	0.0849392	mental disorders
300.12	Agorophobia, social phobia, and panic disorder	ACE2	X	15675338	chrX:15675338:T:A	A	T	T	262	7042	ADD	3652	0.787148	0.138931	0.599513	1.03351	-1.72272	0.0849392	mental disorders
520.1	Hereditary disturbances in tooth structure	TMPRSS2	21	41508700	chr21:41508700:G:A	G	A	A	8	15118	ADD	7563	3.48151	0.724152	0.842108	14.3935	1.72266	0.0849508	digestive
619.3	Noninflammatory disorders of cervix	DPP4	2	162073199	chr2:162073199:T:G	T	G	G	90	14484	ADD	7287	0.612132	0.285117	0.350068	1.07038	-1.72142	0.0851742	genitourinary
224.1	Benign neoplasm of eye, uveal	DPP4	2	162073199	chr2:162073199:T:G	T	G	G	28	17442	ADD	8735	1.51478	0.241312	0.943939	2.43083	1.72088	0.0852724	neoplasms
041.1	Staphylococcus infections	TMPRSS2	21	41508700	chr21:41508700:G:A	G	A	A	150	13970	ADD	7060	2.09918	0.430914	0.902099	4.88477	1.72087	0.0852751	infectious diseases
327.7	Sleep related movement disorders	ACE2	X	15674766	chrX:15674766:C:G	C	G	G	188	10772	ADD	5480	0.79009	0.136913	0.604138	1.03328	-1.72086	0.0852763	neurological
327.31	Central/nonobstroctive sleep apnea	LY6E	8	143018292	chr8:143018292:C:A	C	A	A	136	10772	ADD	5454	1.50278	0.236698	0.94497	2.38987	1.72083	0.0852816	neurological
801.1	Fracture of foot	LY6E	8	143017718	chr8:143017718:G:C	C	G	G	90	15624	ADD	7857	0.5759	0.320789	0.307108	1.07995	-1.7202	0.0853958	injuries & poisonings
496	Chronic airway obstruction	LY6E	8	143018292	chr8:143018292:C:A	C	A	A	1502	11930	ADD	6716	1.15739	0.0850099	0.979759	1.36723	1.71942	0.0855384	respiratory
531.2	Gastric ulcer	LY6E	8	143017718	chr8:143017718:G:C	C	G	G	136	16886	ADD	8511	0.652089	0.24875	0.400471	1.0618	-1.71889	0.0856337	digestive
362.27	Drusen (degenerative) of retina	DPP4	2	162073222	chr2:162073222:G:A	G	A	A	106	13982	ADD	7044	0.646696	0.25372	0.393309	1.06333	-1.71795	0.0858058	sense organs
514	Abnormal findings examination of lungs	TMPRSS2	21	41508701	chr21:41508701:T:G	G	T	T	664	15268	ADD	7966	0.686874	0.218636	0.44748	1.05434	-1.71795	0.0858065	respiratory
361	Retinal detachments and defects	DPP4	2	162073222	chr2:162073222:G:A	G	A	A	120	14542	ADD	7331	1.41711	0.20295	0.952036	2.10939	1.71777	0.0858381	sense organs
872	Traumatic amputation	LY6E	8	143018292	chr8:143018292:C:A	C	A	A	24	15452	ADD	7738	2.11786	0.436935	0.899449	4.98673	1.71743	0.0859011	injuries & poisonings
736.5	Acquired deformities of knee	DPP4	2	162074215	chr2:162074215:T:G	G	T	T	24	15480	ADD	7752	2.01451	0.407847	0.905752	4.48052	1.71725	0.0859335	musculoskeletal
972	Poisoning by agents primarily affecting the cardiovascular system	ACE2	X	15675734	chrX:15675734:C:T	C	T	T	42	12966	ADD	6504	1.44358	0.213838	0.949341	2.19513	1.71685	0.0860068	injuries & poisonings
250.6	Polyneuropathy in diabetes	TMPRSS2	21	41508700	chr21:41508700:G:A	G	A	A	342	9124	ADD	4733	1.76578	0.331289	0.922448	3.3801	1.7163	0.0861078	endocrine/metabolic
745	Pain in joint	DPP4	2	162073222	chr2:162073222:G:A	G	A	A	7122	8400	ADD	7761	0.931656	0.0412633	0.859275	1.01013	-1.71561	0.0862331	musculoskeletal
960	Poisoning by antibiotics	TMPRSS2	21	41508701	chr21:41508701:T:G	G	T	T	332	12966	ADD	6649	0.556487	0.341674	0.284853	1.08715	-1.71541	0.0862699	injuries & poisonings
510	Other diseases of lung	DPP4	2	162073469	chr2:162073469:A:G	A	G	G	566	16598	ADD	8582	1.1784	0.0957729	0.976719	1.42172	1.714	0.086528	respiratory
333.1	Essential tremor	DPP4	2	162073199	chr2:162073199:T:G	T	G	G	60	14406	ADD	7233	1.51342	0.241761	0.942264	2.43079	1.71398	0.0865325	neurological
690	Erythematosquamous dermatosis	DPP4	2	162073199	chr2:162073199:T:G	T	G	G	142	13610	ADD	6876	1.36607	0.182034	0.956151	1.95174	1.71364	0.0865947	dermatologic
528.1	Stomatitis and mucositis	ACE2	X	15674766	chrX:15674766:C:G	C	G	G	18	16206	ADD	8112	0.542437	0.356965	0.269464	1.09194	-1.71357	0.0866086	digestive
740.3	Osteoarthrosis involving more than one site, but not specified as generalized	LY6E	8	143018261	chr8:143018261:G:A	G	A	A	58	11812	ADD	5935	2.92419	0.626384	0.856696	9.98126	1.71304	0.086706	musculoskeletal
250.4	Abnormal glucose	LY6E	8	143017718	chr8:143017718:G:C	C	G	G	1884	9124	ADD	5504	1.11877	0.0655485	0.983893	1.27215	1.71223	0.086854	endocrine/metabolic
250.12	Type 1 diabetes with renal manifestations	DPP4	2	162073222	chr2:162073222:G:A	G	A	A	112	9124	ADD	4618	0.637059	0.263339	0.380211	1.06742	-1.71221	0.0868574	endocrine/metabolic
276.14	Hypopotassemia	DPP4	2	162074215	chr2:162074215:T:G	G	T	T	1408	11046	ADD	6227	1.10951	0.0606976	0.985068	1.24968	1.7121	0.0868786	endocrine/metabolic
253.3	Diabetes insipidus	ACE2	X	15675734	chrX:15675734:C:T	C	T	T	26	14812	ADD	7419	0.576026	0.322233	0.306307	1.08325	-1.71181	0.0869309	endocrine/metabolic
740	Osteoarthrosis	DPP4	2	162073222	chr2:162073222:G:A	G	A	A	2564	11812	ADD	7188	0.901655	0.0604952	0.800842	1.01516	-1.71126	0.0870329	musculoskeletal
427.11	Paroxysmal supraventricular tachycardia	DPP4	2	162074215	chr2:162074215:T:G	G	T	T	542	8980	ADD	4761	0.844089	0.0990491	0.695148	1.02494	-1.71125	0.0870353	circulatory system
961	Poisoning by other anti-infectives	LY6E	8	143018292	chr8:143018292:C:A	C	A	A	22	12966	ADD	6494	2.11696	0.438301	0.896664	4.99798	1.71111	0.0870611	injuries & poisonings
709.6	Other specified diffuse diseases of connective tissue	LY6E	8	143017718	chr8:143017718:G:C	C	G	G	42	13458	ADD	6750	1.66778	0.299062	0.928064	2.9971	1.71034	0.0872037	dermatologic
367.2	Astigmatism	DPP4	2	162074215	chr2:162074215:T:G	G	T	T	572	14070	ADD	7321	0.852277	0.0934665	0.709613	1.02362	-1.71018	0.0872331	sense organs
452	Other venous embolism and thrombosis	LY6E	8	143018261	chr8:143018261:G:A	G	A	A	1244	11138	ADD	6191	0.58305	0.315538	0.314137	1.08216	-1.70973	0.0873166	circulatory system
361	Retinal detachments and defects	DPP4	2	162073199	chr2:162073199:T:G	T	G	G	120	14542	ADD	7331	1.40039	0.196987	0.951859	2.06027	1.7095	0.0873585	sense organs
623	Hypertrophy of female genital organs	TMPRSS2	21	41508700	chr21:41508700:G:A	G	A	A	78	16764	ADD	8421	2.37398	0.505764	0.880988	6.39711	1.70943	0.0873715	genitourinary
772.3	Muscle weakness	ACE2	X	15675734	chrX:15675734:C:T	C	T	T	238	14980	ADD	7609	0.823706	0.113482	0.659442	1.02889	-1.70901	0.08745	symptoms
279.11	Deficiency of humoral immunity	DPP4	2	162073199	chr2:162073199:T:G	T	G	G	28	15946	ADD	7987	1.83518	0.355302	0.914628	3.68224	1.7088	0.0874874	endocrine/metabolic
536.3	Gastroparesis	TMPRSS2	21	41508700	chr21:41508700:G:A	G	A	A	242	14340	ADD	7291	1.81426	0.348645	0.91608	3.59308	1.70856	0.0875331	digestive
376	Disorders of the orbit	DPP4	2	162074215	chr2:162074215:T:G	G	T	T	18	14222	ADD	7120	1.70863	0.313601	0.924082	3.15927	1.7082	0.0875997	sense organs
278.1	Obesity	DPP4	2	162073199	chr2:162073199:T:G	T	G	G	6712	8180	ADD	7446	0.933505	0.0402847	0.862634	1.0102	-1.70806	0.0876257	endocrine/metabolic
557.1	Celiac disease	TMPRSS2	21	41508700	chr21:41508700:G:A	G	A	A	26	12050	ADD	6038	3.58899	0.748145	0.828227	15.5523	1.70805	0.0876269	digestive
292.11	Aphasia	TMPRSS2	21	41508701	chr21:41508701:T:G	G	T	T	72	14340	ADD	7206	1.98069	0.400185	0.90402	4.33965	1.70782	0.0876694	mental disorders
199.4	Neurofibromatosis	DPP4	2	162074215	chr2:162074215:T:G	G	T	T	18	15350	ADD	7684	1.79354	0.342271	0.917001	3.50795	1.70681	0.0878573	neoplasms
433.31	Transient cerebral ischemia	LY6E	8	143017718	chr8:143017718:G:C	C	G	G	1170	14764	ADD	7967	1.14286	0.0782575	0.980345	1.33231	1.70631	0.0879513	circulatory system
501	Pneumonitis due to inhalation of food or vomitus	TMPRSS2	21	41508701	chr21:41508701:T:G	G	T	T	70	14020	ADD	7045	1.87166	0.367369	0.911009	3.84532	1.70626	0.0879594	respiratory
712	Infective connective tissue disorders	LY6E	8	143018292	chr8:143018292:C:A	C	A	A	22	14484	ADD	7253	2.09712	0.434152	0.895515	4.91106	1.70578	0.0880498	musculoskeletal
563	Constipation	ACE2	X	15674766	chrX:15674766:C:G	C	G	G	1192	15072	ADD	8132	1.09618	0.0538713	0.986336	1.21825	1.70458	0.0882727	digestive
110.1	Dermatophytosis	ACE2	X	15675244	chrX:15675244:A:G	G	A	A	680	12868	ADD	6774	1.12709	0.070196	0.982218	1.29333	1.70437	0.0883121	infectious diseases
850	Hemorrhage or hematoma complicating a procedure	LY6E	8	143018261	chr8:143018261:G:A	G	A	A	196	14420	ADD	7308	2.07715	0.429133	0.895755	4.81667	1.70343	0.0884882	injuries & poisonings
433.21	Cerebral artery occlusion, with cerebral infarction	LY6E	8	143017718	chr8:143017718:G:C	C	G	G	896	14764	ADD	7830	1.16036	0.0873587	0.977762	1.37706	1.70253	0.0886566	circulatory system
276.14	Hypopotassemia	LY6E	8	143018292	chr8:143018292:C:A	C	A	A	1408	11046	ADD	6227	1.1588	0.0866057	0.977892	1.37318	1.70183	0.0887871	endocrine/metabolic
447.7	Aortic ectasia	ACE2	X	15675734	chrX:15675734:C:T	C	T	T	104	14400	ADD	7252	0.776202	0.148899	0.579739	1.03924	-1.70144	0.0888605	circulatory system
366.1	Nonsenile Cataract	LY6E	8	143018292	chr8:143018292:C:A	C	A	A	14	13816	ADD	6915	2.12566	0.443208	0.891733	5.06704	1.70142	0.0888639	sense organs
277.5	Other disorders of lipoid metabolism	LY6E	8	143017718	chr8:143017718:G:C	C	G	G	124	16250	ADD	8187	0.640754	0.261618	0.383709	1.06999	-1.70138	0.0888721	endocrine/metabolic
253.3	Diabetes insipidus	TMPRSS2	21	41508700	chr21:41508700:G:A	G	A	A	26	14812	ADD	7419	3.69964	0.769007	0.819559	16.7009	1.7012	0.0889048	endocrine/metabolic
375	Disorders of lacrimal system	ACE2	X	15675734	chrX:15675734:C:T	C	T	T	58	14222	ADD	7140	0.66928	0.236046	0.421391	1.06299	-1.70116	0.0889126	sense organs
577	Diseases of pancreas	ACE2	X	15675244	chrX:15675244:A:G	G	A	A	330	17022	ADD	8676	1.17573	0.0951813	0.975642	1.41686	1.70088	0.088965	digestive
291.8	Alteration of consciousness	DPP4	2	162073222	chr2:162073222:G:A	G	A	A	156	14340	ADD	7248	0.687067	0.220669	0.445826	1.05885	-1.70084	0.0889733	mental disorders
260.2	severe protein-calorie malnutrition	DPP4	2	162073222	chr2:162073222:G:A	G	A	A	252	11776	ADD	6014	1.28611	0.14794	0.962389	1.71872	1.70083	0.0889754	endocrine/metabolic
277.4	Disorders of bilirubin excretion	ACE2	X	15675244	chrX:15675244:A:G	G	A	A	86	16250	ADD	8168	1.3105	0.158989	0.959636	1.78966	1.70082	0.0889769	endocrine/metabolic
571	Chronic liver disease and cirrhosis	DPP4	2	162073222	chr2:162073222:G:A	G	A	A	520	14022	ADD	7271	1.20024	0.10734	0.972523	1.48127	1.7004	0.0890557	digestive
292.4	Altered mental status	ACE2	X	15674766	chrX:15674766:C:G	C	G	G	408	14340	ADD	7374	0.862591	0.0869424	0.727444	1.02285	-1.70014	0.0891037	mental disorders
365.11	Primary open angle glaucoma	DPP4	2	162073469	chr2:162073469:A:G	A	G	G	498	14542	ADD	7520	1.19663	0.105599	0.972915	1.47179	1.69993	0.0891433	sense organs
626.14	Irregular menstrual bleeding	DPP4	2	162074215	chr2:162074215:T:G	G	T	T	130	12686	ADD	6408	1.36222	0.181871	0.95376	1.94561	1.69965	0.0891969	genitourinary
595	Hydronephrosis	TMPRSS2	21	41508700	chr21:41508700:G:A	G	A	A	178	16644	ADD	8411	1.96311	0.397017	0.901578	4.27452	1.699	0.0893198	genitourinary
520.2	Disturbances in tooth eruption	DPP4	2	162073469	chr2:162073469:A:G	A	G	G	64	15118	ADD	7591	0.644256	0.258847	0.387907	1.07001	-1.69853	0.0894072	digestive
323.2	Acute (transverse) myelitis	DPP4	2	162073469	chr2:162073469:A:G	A	G	G	6	17284	ADD	8645	2.17751	0.45815	0.887119	5.34487	1.69853	0.0894077	neurological
070.4	Chronic hepatitis	ACE2	X	15674766	chrX:15674766:C:G	C	G	G	106	12338	ADD	6222	0.758157	0.163005	0.550819	1.04354	-1.6985	0.0894129	infectious diseases
277.4	Disorders of bilirubin excretion	ACE2	X	15674316	chrX:15674316:A:C	C	A	A	86	16250	ADD	8168	1.30985	0.158979	0.959179	1.78873	1.69781	0.0895439	endocrine/metabolic
277.4	Disorders of bilirubin excretion	ACE2	X	15674699	chrX:15674699:T:C	C	T	T	86	16250	ADD	8168	1.30985	0.158979	0.959179	1.78873	1.69781	0.0895439	endocrine/metabolic
277.4	Disorders of bilirubin excretion	ACE2	X	15675338	chrX:15675338:T:A	A	T	T	86	16250	ADD	8168	1.30985	0.158979	0.959179	1.78873	1.69781	0.0895439	endocrine/metabolic
907	Injuries to the nervous system	TMPRSS2	21	41508700	chr21:41508700:G:A	G	A	A	52	17622	ADD	8837	2.82989	0.612742	0.851535	9.40451	1.69768	0.0895689	injuries & poisonings
713.5	Arthropathy associated with neurological disorders	DPP4	2	162073222	chr2:162073222:G:A	G	A	A	26	14484	ADD	7255	1.76955	0.336254	0.915467	3.42045	1.6973	0.0896395	musculoskeletal
964	Poisoning by agents primarily affecting blood constituents	ACE2	X	15674766	chrX:15674766:C:G	C	G	G	36	12966	ADD	6501	0.629004	0.273177	0.368235	1.07444	-1.69714	0.0896711	injuries & poisonings
041.11	Methicillin sensitive Staphylococcus aureus	LY6E	8	143017718	chr8:143017718:G:C	C	G	G	98	13970	ADD	7034	0.591614	0.309298	0.322674	1.08471	-1.69707	0.0896826	infectious diseases
550.1	Inguinal hernia	ACE2	X	15675734	chrX:15675734:C:T	C	T	T	338	14972	ADD	7655	0.870242	0.0819148	0.741164	1.0218	-1.69668	0.0897565	digestive
274.1	Gout	LY6E	8	143018261	chr8:143018261:G:A	G	A	A	1164	16026	ADD	8595	0.534513	0.369229	0.259221	1.10216	-1.69651	0.08979	endocrine/metabolic
340.1	Migrain with aura	DPP4	2	162073199	chr2:162073199:T:G	T	G	G	184	14020	ADD	7102	0.720619	0.193134	0.493525	1.05221	-1.69646	0.0897982	neurological
202.21	Nodular lymphoma	DPP4	2	162074215	chr2:162074215:T:G	G	T	T	14	17048	ADD	8531	1.9434	0.391785	0.901723	4.18842	1.69592	0.0899005	neoplasms
709.3	Systemic sclerosis	ACE2	X	15674766	chrX:15674766:C:G	C	G	G	66	13458	ADD	6762	0.679652	0.227721	0.43496	1.062	-1.69582	0.0899197	dermatologic
401	Hypertension	DPP4	2	162073222	chr2:162073222:G:A	G	A	A	8712	5666	ADD	7189	0.914271	0.0528529	0.824302	1.01406	-1.6958	0.0899229	circulatory system
697	Sarcoidosis	DPP4	2	162073469	chr2:162073469:A:G	A	G	G	512	13610	ADD	7061	1.18583	0.100518	0.973778	1.44405	1.69561	0.089959	dermatologic
371.3	Inflammation of eyelids	ACE2	X	15675734	chrX:15675734:C:T	C	T	T	440	14556	ADD	7498	1.16017	0.0876314	0.977083	1.37757	1.6954	0.0899995	sense organs
338	Pain NEC	DPP4	2	162073199	chr2:162073199:T:G	T	G	G	842	13512	ADD	7177	0.86039	0.088697	0.723097	1.02375	-1.69531	0.0900163	neurological
379.1	Scleritis and episcleritis	TMPRSS2	21	41508700	chr21:41508700:G:A	G	A	A	56	14222	ADD	7139	2.8337	0.614459	0.849817	9.44893	1.69512	0.0900522	sense organs
110.1	Dermatophytosis	ACE2	X	15674316	chrX:15674316:A:C	C	A	A	680	12868	ADD	6774	1.12635	0.0701928	0.98158	1.29248	1.6951	0.0900557	infectious diseases
110.1	Dermatophytosis	ACE2	X	15674699	chrX:15674699:T:C	C	T	T	680	12868	ADD	6774	1.12635	0.0701928	0.98158	1.29248	1.6951	0.0900557	infectious diseases
110.1	Dermatophytosis	ACE2	X	15675338	chrX:15675338:T:A	A	T	T	680	12868	ADD	6774	1.12635	0.0701928	0.98158	1.29248	1.6951	0.0900557	infectious diseases
715.2	Ankylosing spondylitis	LY6E	8	143018261	chr8:143018261:G:A	G	A	A	24	14934	ADD	7479	3.76507	0.782121	0.812888	17.4388	1.69509	0.0900581	musculoskeletal
705	Disorders of sweat glands	LY6E	8	143017718	chr8:143017718:G:C	C	G	G	128	14256	ADD	7192	1.41642	0.205412	0.946988	2.11854	1.69479	0.0901145	dermatologic
1007	Injury to blood vessels	LY6E	8	143018261	chr8:143018261:G:A	G	A	A	8	17722	ADD	8865	3.35852	0.714843	0.827318	13.634	1.69478	0.0901175	NULL
433.6	Acute, but ill-defined cerebrovascular disease	DPP4	2	162073222	chr2:162073222:G:A	G	A	A	156	14764	ADD	7460	1.32409	0.165671	0.956967	1.83204	1.69446	0.0901782	circulatory system
614	Inflammatory diseases of female pelvic organs	DPP4	2	162073199	chr2:162073199:T:G	T	G	G	1146	14548	ADD	7847	0.87408	0.079434	0.748061	1.02133	-1.69427	0.0902131	genitourinary
727.5	Rupture of synovium	TMPRSS2	21	41508701	chr21:41508701:T:G	G	T	T	82	11508	ADD	5795	1.88122	0.373021	0.905574	3.90801	1.69406	0.090253	musculoskeletal
741.2	Stiffness of joint	DPP4	2	162074215	chr2:162074215:T:G	G	T	T	104	14448	ADD	7276	0.733959	0.18258	0.513168	1.04975	-1.69406	0.0902537	musculoskeletal
603	Other disorders of testis	ACE2	X	15675244	chrX:15675244:A:G	G	A	A	48	14468	ADD	7258	1.39247	0.195444	0.949342	2.04243	1.69398	0.0902698	genitourinary
510	Other diseases of lung	ACE2	X	15674316	chrX:15674316:A:C	C	A	A	566	16598	ADD	8582	0.865798	0.0850813	0.732816	1.02291	-1.69372	0.0903182	respiratory
510	Other diseases of lung	ACE2	X	15674699	chrX:15674699:T:C	C	T	T	566	16598	ADD	8582	0.865798	0.0850813	0.732816	1.02291	-1.69372	0.0903182	respiratory
510	Other diseases of lung	ACE2	X	15675338	chrX:15675338:T:A	A	T	T	566	16598	ADD	8582	0.865798	0.0850813	0.732816	1.02291	-1.69372	0.0903182	respiratory
577	Diseases of pancreas	ACE2	X	15674316	chrX:15674316:A:C	C	A	A	330	17022	ADD	8676	1.17486	0.0951692	0.974941	1.41578	1.6933	0.090398	digestive
577	Diseases of pancreas	ACE2	X	15674699	chrX:15674699:T:C	C	T	T	330	17022	ADD	8676	1.17486	0.0951692	0.974941	1.41578	1.6933	0.090398	digestive
577	Diseases of pancreas	ACE2	X	15675338	chrX:15675338:T:A	A	T	T	330	17022	ADD	8676	1.17486	0.0951692	0.974941	1.41578	1.6933	0.090398	digestive
364.1	Corneal opacity	ACE2	X	15674316	chrX:15674316:A:C	C	A	A	32	14542	ADD	7287	0.533504	0.371062	0.257803	1.10404	-1.69322	0.0904139	sense organs
364.1	Corneal opacity	ACE2	X	15674699	chrX:15674699:T:C	C	T	T	32	14542	ADD	7287	0.533504	0.371062	0.257803	1.10404	-1.69322	0.0904139	sense organs
364.1	Corneal opacity	ACE2	X	15675338	chrX:15675338:T:A	A	T	T	32	14542	ADD	7287	0.533504	0.371062	0.257803	1.10404	-1.69322	0.0904139	sense organs
224.1	Benign neoplasm of eye, uveal	DPP4	2	162073222	chr2:162073222:G:A	G	A	A	28	17442	ADD	8735	1.51817	0.246623	0.936258	2.46177	1.6929	0.0904747	neoplasms
620.1	Dysplasia of cervix	TMPRSS2	21	41508700	chr21:41508700:G:A	G	A	A	22	16764	ADD	8393	3.46336	0.733811	0.822008	14.5921	1.69286	0.0904824	genitourinary
440.22	Atherosclerosis of native arteries of the extremities with intermittent claudication	DPP4	2	162074215	chr2:162074215:T:G	G	T	T	210	14400	ADD	7305	1.26389	0.138386	0.963639	1.65769	1.69231	0.0905861	circulatory system
212	Benign neoplasm of respiratory and intrathoracic organs	ACE2	X	15674316	chrX:15674316:A:C	C	A	A	62	17630	ADD	8846	0.626222	0.276579	0.364169	1.07684	-1.69229	0.0905915	neoplasms
212	Benign neoplasm of respiratory and intrathoracic organs	ACE2	X	15674699	chrX:15674699:T:C	C	T	T	62	17630	ADD	8846	0.626222	0.276579	0.364169	1.07684	-1.69229	0.0905915	neoplasms
212	Benign neoplasm of respiratory and intrathoracic organs	ACE2	X	15675338	chrX:15675338:T:A	A	T	T	62	17630	ADD	8846	0.626222	0.276579	0.364169	1.07684	-1.69229	0.0905915	neoplasms
603.2	Spermatocele	ACE2	X	15674766	chrX:15674766:C:G	C	G	G	18	14468	ADD	7243	0.634471	0.268858	0.374592	1.07464	-1.69221	0.0906066	genitourinary
707	Chronic ulcer of skin	ACE2	X	15675734	chrX:15675734:C:T	C	T	T	296	16708	ADD	8502	0.850972	0.0953661	0.705894	1.02587	-1.69217	0.0906133	dermatologic
364.1	Corneal opacity	ACE2	X	15675244	chrX:15675244:A:G	G	A	A	32	14542	ADD	7287	0.533874	0.370975	0.258026	1.10462	-1.69175	0.0906944	sense organs
286.1	Congenital coagulation defects	DPP4	2	162073222	chr2:162073222:G:A	G	A	A	20	13656	ADD	6838	1.9685	0.400357	0.898155	4.3144	1.69167	0.0907088	hematopoietic
401.2	Hypertensive heart and/or renal disease	LY6E	8	143018261	chr8:143018261:G:A	G	A	A	2224	5666	ADD	3945	0.589166	0.312845	0.319112	1.08776	-1.69108	0.0908213	circulatory system
212	Benign neoplasm of respiratory and intrathoracic organs	ACE2	X	15675244	chrX:15675244:A:G	G	A	A	62	17630	ADD	8846	0.626511	0.27659	0.36433	1.07736	-1.69055	0.0909232	neoplasms
558	Noninfectious gastroenteritis	ACE2	X	15675244	chrX:15675244:A:G	G	A	A	400	12050	ADD	6225	1.17385	0.0948698	0.974676	1.41373	1.68959	0.0911056	digestive
526.5	Inflammatory conditions of jaw	ACE2	X	15675244	chrX:15675244:A:G	G	A	A	10	15118	ADD	7564	1.8137	0.352449	0.908993	3.61885	1.68924	0.0911744	digestive
771.1	Swelling of limb	ACE2	X	15674766	chrX:15674766:C:G	C	G	G	1490	12886	ADD	7188	1.08366	0.0475698	0.987192	1.18956	1.68898	0.0912229	symptoms
349	Other and unspecified disorders of the nervous system	DPP4	2	162073199	chr2:162073199:T:G	T	G	G	54	14406	ADD	7230	0.535086	0.370267	0.258971	1.1056	-1.68885	0.0912478	neurological
612.2	Hypertrophy of breast (Gynecomastia)	DPP4	2	162074215	chr2:162074215:T:G	G	T	T	154	14402	ADD	7278	1.31177	0.160691	0.957364	1.79737	1.68881	0.0912558	genitourinary
510	Other diseases of lung	ACE2	X	15675244	chrX:15675244:A:G	G	A	A	566	16598	ADD	8582	0.866164	0.0850864	0.733119	1.02335	-1.68865	0.0912857	respiratory
255.1	Adrenal hyperfunction	ACE2	X	15674316	chrX:15674316:A:C	C	A	A	62	14812	ADD	7437	0.639	0.265214	0.37997	1.07461	-1.68864	0.0912887	endocrine/metabolic
255.1	Adrenal hyperfunction	ACE2	X	15674699	chrX:15674699:T:C	C	T	T	62	14812	ADD	7437	0.639	0.265214	0.37997	1.07461	-1.68864	0.0912887	endocrine/metabolic
255.1	Adrenal hyperfunction	ACE2	X	15675244	chrX:15675244:A:G	G	A	A	62	14812	ADD	7437	0.639	0.265214	0.37997	1.07461	-1.68864	0.0912887	endocrine/metabolic
255.1	Adrenal hyperfunction	ACE2	X	15675338	chrX:15675338:T:A	A	T	T	62	14812	ADD	7437	0.639	0.265214	0.37997	1.07461	-1.68864	0.0912887	endocrine/metabolic
260.6	Anorexia	LY6E	8	143017718	chr8:143017718:G:C	C	G	G	222	11776	ADD	5999	1.3118	0.160737	0.957302	1.79758	1.68849	0.0913181	endocrine/metabolic
257	Testicular dysfunction	TMPRSS2	21	41508701	chr21:41508701:T:G	G	T	T	172	14812	ADD	7492	1.54361	0.257119	0.932561	2.55504	1.68841	0.0913318	endocrine/metabolic
255.1	Adrenal hyperfunction	LY6E	8	143018292	chr8:143018292:C:A	C	A	A	62	14812	ADD	7437	0.420255	0.513496	0.153612	1.14975	-1.68822	0.0913693	endocrine/metabolic
526.5	Inflammatory conditions of jaw	ACE2	X	15674316	chrX:15674316:A:C	C	A	A	10	15118	ADD	7564	1.81358	0.352656	0.908564	3.62008	1.68806	0.0914003	digestive
526.5	Inflammatory conditions of jaw	ACE2	X	15674699	chrX:15674699:T:C	C	T	T	10	15118	ADD	7564	1.81358	0.352656	0.908564	3.62008	1.68806	0.0914003	digestive
526.5	Inflammatory conditions of jaw	ACE2	X	15675338	chrX:15675338:T:A	A	T	T	10	15118	ADD	7564	1.81358	0.352656	0.908564	3.62008	1.68806	0.0914003	digestive
477	Epistaxis or throat hemorrhage	LY6E	8	143017718	chr8:143017718:G:C	C	G	G	340	10330	ADD	5335	1.26155	0.137671	0.963208	1.65231	1.68768	0.0914734	respiratory
585.33	Chronic Kidney Disease, Stage III	LY6E	8	143018292	chr8:143018292:C:A	C	A	A	1790	10540	ADD	6165	1.15531	0.0855792	0.976907	1.36629	1.68696	0.0916115	genitourinary
228	Hemangioma and lymphangioma, any site	ACE2	X	15674766	chrX:15674766:C:G	C	G	G	62	17556	ADD	8809	0.68662	0.222923	0.443571	1.06284	-1.68656	0.0916872	neoplasms
727.5	Rupture of synovium	TMPRSS2	21	41508700	chr21:41508700:G:A	G	A	A	82	11508	ADD	5795	2.46439	0.534806	0.863936	7.02969	1.68649	0.0917019	musculoskeletal
369	Infection of the eye	LY6E	8	143017718	chr8:143017718:G:C	C	G	G	240	14556	ADD	7398	1.30557	0.158139	0.95762	1.77995	1.68613	0.0917715	sense organs
871.1	Open wound of hand except finger(s)	DPP4	2	162074215	chr2:162074215:T:G	G	T	T	58	15452	ADD	7755	0.611308	0.291888	0.344988	1.08322	-1.68611	0.0917753	injuries & poisonings
283	Acquired hemolytic anemias	DPP4	2	162073222	chr2:162073222:G:A	G	A	A	26	8724	ADD	4375	1.76896	0.338351	0.911409	3.43339	1.6858	0.0918341	hematopoietic
274.1	Gout	DPP4	2	162073469	chr2:162073469:A:G	A	G	G	1164	16026	ADD	8595	1.12755	0.071216	0.980658	1.29645	1.68571	0.091852	endocrine/metabolic
288.11	Neutropenia	LY6E	8	143017718	chr8:143017718:G:C	C	G	G	194	13698	ADD	6946	1.3333	0.170656	0.954254	1.8629	1.68558	0.0918765	hematopoietic
535.9	Gastritis and duodenitis, NOS	LY6E	8	143017718	chr8:143017718:G:C	C	G	G	308	14340	ADD	7324	0.759562	0.163187	0.551643	1.04585	-1.68526	0.0919385	digestive
562.1	Diverticulosis	TMPRSS2	21	41508701	chr21:41508701:T:G	G	T	T	794	12050	ADD	6422	1.30624	0.158541	0.957355	1.78227	1.68508	0.0919738	digestive
558	Noninfectious gastroenteritis	ACE2	X	15674316	chrX:15674316:A:C	C	A	A	400	12050	ADD	6225	1.17325	0.0948655	0.974184	1.41299	1.68425	0.0921326	digestive
558	Noninfectious gastroenteritis	ACE2	X	15674699	chrX:15674699:T:C	C	T	T	400	12050	ADD	6225	1.17325	0.0948655	0.974184	1.41299	1.68425	0.0921326	digestive
558	Noninfectious gastroenteritis	ACE2	X	15675338	chrX:15675338:T:A	A	T	T	400	12050	ADD	6225	1.17325	0.0948655	0.974184	1.41299	1.68425	0.0921326	digestive
564.1	Irritable Bowel Syndrome	DPP4	2	162073199	chr2:162073199:T:G	T	G	G	294	12050	ADD	6172	1.2497	0.132418	0.964036	1.62003	1.68336	0.0923051	digestive
585.1	Acute renal failure	LY6E	8	143018292	chr8:143018292:C:A	C	A	A	2510	10540	ADD	6525	1.12946	0.0723377	0.98016	1.3015	1.68294	0.0923865	genitourinary
603	Other disorders of testis	ACE2	X	15674316	chrX:15674316:A:C	C	A	A	48	14468	ADD	7258	1.3894	0.195428	0.947281	2.03786	1.68283	0.0924082	genitourinary
603	Other disorders of testis	ACE2	X	15674699	chrX:15674699:T:C	C	T	T	48	14468	ADD	7258	1.3894	0.195428	0.947281	2.03786	1.68283	0.0924082	genitourinary
603	Other disorders of testis	ACE2	X	15675338	chrX:15675338:T:A	A	T	T	48	14468	ADD	7258	1.3894	0.195428	0.947281	2.03786	1.68283	0.0924082	genitourinary
743.2	Pathologic fracture	TMPRSS2	21	41508700	chr21:41508700:G:A	G	A	A	50	15886	ADD	7968	2.7513	0.601443	0.846424	8.94307	1.68274	0.0924257	musculoskeletal
204.21	Myeloid leukemia, acute	DPP4	2	162073222	chr2:162073222:G:A	G	A	A	10	17048	ADD	8529	2.02003	0.417913	0.890492	4.58234	1.68244	0.0924837	neoplasms
575.1	Cholangitis	ACE2	X	15674766	chrX:15674766:C:G	C	G	G	42	16340	ADD	8191	0.670714	0.237437	0.421144	1.06818	-1.68218	0.0925332	digestive
187	Cancer of other male genital organs	ACE2	X	15674766	chrX:15674766:C:G	C	G	G	24	16682	ADD	8353	0.619814	0.284365	0.354984	1.08222	-1.68211	0.0925466	neoplasms
288.3	Eosinophilia	TMPRSS2	21	41508701	chr21:41508701:T:G	G	T	T	38	13698	ADD	6868	2.20924	0.471322	0.877105	5.56458	1.68175	0.0926173	hematopoietic
480.1	Bacterial pneumonia	TMPRSS2	21	41508700	chr21:41508700:G:A	G	A	A	140	13578	ADD	6859	2.06912	0.432373	0.886644	4.82862	1.6817	0.0926261	respiratory
415.11	Pulmonary embolism and infarction, acute	DPP4	2	162073469	chr2:162073469:A:G	A	G	G	606	14402	ADD	7504	1.16852	0.0926461	0.974487	1.40119	1.68101	0.0927602	circulatory system
652	Malposition and malpresentation of fetus or obstruction	ACE2	X	15675244	chrX:15675244:A:G	G	A	A	46	17608	ADD	8827	0.637486	0.267829	0.377133	1.07757	-1.68101	0.092761	pregnancy complications
530.1	Esophagitis, GERD and related diseases	DPP4	2	162073469	chr2:162073469:A:G	A	G	G	3682	9678	ADD	6680	0.923997	0.0470238	0.842644	1.0132	-1.68099	0.0927651	digestive
785	Abdominal pain	DPP4	2	162073222	chr2:162073222:G:A	G	A	A	6144	9004	ADD	7574	0.931047	0.0425055	0.856626	1.01193	-1.68084	0.0927935	symptoms
870	Open wounds of head; neck; and trunk	ACE2	X	15674316	chrX:15674316:A:C	C	A	A	306	15452	ADD	7879	0.82694	0.113123	0.662497	1.0322	-1.67979	0.0929979	injuries & poisonings
870	Open wounds of head; neck; and trunk	ACE2	X	15674699	chrX:15674699:T:C	C	T	T	306	15452	ADD	7879	0.82694	0.113123	0.662497	1.0322	-1.67979	0.0929979	injuries & poisonings
870	Open wounds of head; neck; and trunk	ACE2	X	15675244	chrX:15675244:A:G	G	A	A	306	15452	ADD	7879	0.82694	0.113123	0.662497	1.0322	-1.67979	0.0929979	injuries & poisonings
870	Open wounds of head; neck; and trunk	ACE2	X	15675338	chrX:15675338:T:A	A	T	T	306	15452	ADD	7879	0.82694	0.113123	0.662497	1.0322	-1.67979	0.0929979	injuries & poisonings
626.1	Irregular menstrual cycle/bleeding	ACE2	X	15674766	chrX:15674766:C:G	C	G	G	1306	12686	ADD	6996	1.1122	0.0633179	0.982399	1.25916	1.6795	0.0930541	genitourinary
458.2	Iatrogenic hypotension	LY6E	8	143018261	chr8:143018261:G:A	G	A	A	70	12600	ADD	6335	2.88132	0.630122	0.837974	9.90723	1.67943	0.0930676	circulatory system
695.4	Lupus (localized and systemic)	DPP4	2	162073469	chr2:162073469:A:G	A	G	G	356	13478	ADD	6917	1.22017	0.118509	0.967262	1.53919	1.67909	0.0931348	dermatologic
557	Intestinal malabsorption (non-celiac)	LY6E	8	143018292	chr8:143018292:C:A	C	A	A	42	12050	ADD	6046	1.9023	0.383014	0.897958	4.02995	1.67895	0.0931617	digestive
711	Arthropathy associated with infections	TMPRSS2	21	41508701	chr21:41508701:T:G	G	T	T	38	14484	ADD	7261	2.12797	0.449857	0.881142	5.13906	1.67868	0.0932138	musculoskeletal
229	Benign neoplasm of unspecified sites	DPP4	2	162073469	chr2:162073469:A:G	A	G	G	56	17594	ADD	8825	1.55657	0.263611	0.928502	2.60949	1.67856	0.0932387	neoplasms
761	Cervicalgia	LY6E	8	143018261	chr8:143018261:G:A	G	A	A	1596	14290	ADD	7943	0.625625	0.279497	0.361748	1.08199	-1.67803	0.0933414	symptoms
364.1	Corneal opacity	ACE2	X	15675734	chrX:15675734:C:T	C	T	T	32	14542	ADD	7287	1.5789	0.272208	0.926081	2.69189	1.67785	0.0933759	sense organs
202.2	Non-Hodgkins lymphoma	DPP4	2	162074215	chr2:162074215:T:G	G	T	T	148	17048	ADD	8598	1.31795	0.164579	0.954571	1.81965	1.67746	0.0934519	neoplasms
395.4	Nonrheumatic pulmonary valve disorders	TMPRSS2	21	41508701	chr21:41508701:T:G	G	T	T	28	14322	ADD	7175	2.38113	0.517244	0.863981	6.56239	1.6773	0.0934832	circulatory system
1009	Injury, NOS	ACE2	X	15675734	chrX:15675734:C:T	C	T	T	1346	14966	ADD	8156	1.08863	0.0506377	0.985775	1.20222	1.67704	0.0935353	NULL
649.1	Diabetes or abnormal glucose tolerance complicating pregnancy	DPP4	2	162073222	chr2:162073222:G:A	G	A	A	328	15568	ADD	7948	1.26487	0.140124	0.961108	1.66464	1.67687	0.0935687	pregnancy complications
327.72	Sleep related leg cramps	TMPRSS2	21	41508701	chr21:41508701:T:G	G	T	T	38	10772	ADD	5405	2.17	0.462024	0.877374	5.36705	1.67681	0.093579	neurological
709.4	Polymyositis	TMPRSS2	21	41508700	chr21:41508700:G:A	G	A	A	20	13458	ADD	6739	3.54454	0.754902	0.807211	15.5645	1.67626	0.0936877	dermatologic
642	Hypertension complicating pregnancy, childbirth, and the puerperium	TMPRSS2	21	41508700	chr21:41508700:G:A	G	A	A	592	16758	ADD	8675	0.460971	0.46209	0.186355	1.14026	-1.67591	0.0937561	pregnancy complications
652	Malposition and malpresentation of fetus or obstruction	ACE2	X	15674316	chrX:15674316:A:C	C	A	A	46	17608	ADD	8827	0.639069	0.267185	0.378547	1.07889	-1.67578	0.0937814	pregnancy complications
652	Malposition and malpresentation of fetus or obstruction	ACE2	X	15674699	chrX:15674699:T:C	C	T	T	46	17608	ADD	8827	0.639069	0.267185	0.378547	1.07889	-1.67578	0.0937814	pregnancy complications
652	Malposition and malpresentation of fetus or obstruction	ACE2	X	15675338	chrX:15675338:T:A	A	T	T	46	17608	ADD	8827	0.639069	0.267185	0.378547	1.07889	-1.67578	0.0937814	pregnancy complications
252.1	Hyperparathyroidism	DPP4	2	162073199	chr2:162073199:T:G	T	G	G	440	14812	ADD	7626	1.20316	0.110389	0.969085	1.49379	1.67549	0.0938387	endocrine/metabolic
854	Complications of cardiac/vascular device, implant, and graft	ACE2	X	15675244	chrX:15675244:A:G	G	A	A	720	14420	ADD	7570	1.11793	0.066546	0.981231	1.27368	1.67524	0.0938873	injuries & poisonings
626.1	Irregular menstrual cycle/bleeding	TMPRSS2	21	41508700	chr21:41508700:G:A	G	A	A	1306	12686	ADD	6996	1.41914	0.208989	0.942178	2.13755	1.67497	0.0939405	genitourinary
772.1	Muscular wasting and disuse atrophy	TMPRSS2	21	41508700	chr21:41508700:G:A	G	A	A	112	14980	ADD	7546	2.2144	0.474829	0.873135	5.61607	1.67425	0.0940815	symptoms
840.3	Joint/ligament sprain	DPP4	2	162073199	chr2:162073199:T:G	T	G	G	344	13340	ADD	6842	1.22935	0.123336	0.965365	1.56552	1.67417	0.0940977	injuries & poisonings
726.4	Calcaneal spur; Exostosis NOS	LY6E	8	143018261	chr8:143018261:G:A	G	A	A	70	11508	ADD	5789	2.86334	0.62838	0.835592	9.81186	1.67413	0.0941058	musculoskeletal
585.34	Chronic Kidney Disease, Stage IV	ACE2	X	15674766	chrX:15674766:C:G	C	G	G	784	10540	ADD	5662	0.900074	0.0628868	0.795699	1.01814	-1.6741	0.0941117	genitourinary
729.3	Panniculitis	DPP4	2	162073469	chr2:162073469:A:G	A	G	G	36	11508	ADD	5772	1.70953	0.32044	0.91226	3.20359	1.67339	0.0942506	musculoskeletal
1008	Crushing or internal injury to organs	DPP4	2	162073199	chr2:162073199:T:G	T	G	G	36	17628	ADD	8832	0.455038	0.470618	0.180908	1.14456	-1.67306	0.094315	NULL
771	Musculoskeletal symptoms referable to limbs	LY6E	8	143017718	chr8:143017718:G:C	C	G	G	494	12886	ADD	6690	1.20923	0.113604	0.96785	1.5108	1.67232	0.0944622	symptoms
272.13	Mixed hyperlipidemia	LY6E	8	143018292	chr8:143018292:C:A	C	A	A	2942	8752	ADD	5847	0.87848	0.0774793	0.754712	1.02254	-1.67222	0.0944813	endocrine/metabolic
772.6	Facial weakness	LY6E	8	143018261	chr8:143018261:G:A	G	A	A	56	14980	ADD	7518	2.81462	0.619144	0.836378	9.47188	1.67138	0.0946465	symptoms
362.9	Retinal edema	DPP4	2	162073469	chr2:162073469:A:G	A	G	G	124	13982	ADD	7053	1.34812	0.178736	0.949708	1.91368	1.67127	0.0946693	sense organs
345	Epilepsy, recurrent seizures, convulsions	LY6E	8	143018261	chr8:143018261:G:A	G	A	A	662	14406	ADD	7534	1.59383	0.278928	0.922608	2.75337	1.67118	0.0946869	neurological
614.54	Abscess or ulceration of vulva	TMPRSS2	21	41508701	chr21:41508701:T:G	G	T	T	46	14548	ADD	7297	2.21459	0.475881	0.871409	5.62812	1.67072	0.0947762	genitourinary
752.1	Neural tube defects	ACE2	X	15675244	chrX:15675244:A:G	G	A	A	26	17474	ADD	8750	1.70042	0.317781	0.91214	3.16996	1.67058	0.0948052	congenital anomalies
271	Disorders of carbohydrate transport and metabolism	LY6E	8	143018261	chr8:143018261:G:A	G	A	A	54	15174	ADD	7614	2.86302	0.629653	0.833419	9.83527	1.67057	0.0948071	endocrine/metabolic
752.1	Neural tube defects	ACE2	X	15674316	chrX:15674316:A:C	C	A	A	26	17474	ADD	8750	1.70045	0.317858	0.912016	3.17048	1.67022	0.0948763	congenital anomalies
752.1	Neural tube defects	ACE2	X	15674699	chrX:15674699:T:C	C	T	T	26	17474	ADD	8750	1.70045	0.317858	0.912016	3.17048	1.67022	0.0948763	congenital anomalies
752.1	Neural tube defects	ACE2	X	15675338	chrX:15675338:T:A	A	T	T	26	17474	ADD	8750	1.70045	0.317858	0.912016	3.17048	1.67022	0.0948763	congenital anomalies
401.2	Hypertensive heart and/or renal disease	TMPRSS2	21	41508700	chr21:41508700:G:A	G	A	A	2224	5666	ADD	3945	0.653208	0.254975	0.396293	1.07668	-1.6702	0.0948794	circulatory system
230	Kaposi's sarcoma	ACE2	X	15674766	chrX:15674766:C:G	C	G	G	10	17732	ADD	8871	0.538028	0.371238	0.2599	1.11379	-1.66967	0.094985	neoplasms
575	Other biliary tract disease	TMPRSS2	21	41508700	chr21:41508700:G:A	G	A	A	102	16340	ADD	8221	2.23633	0.48213	0.869251	5.75341	1.66933	0.0950517	digestive
916	NA	ACE2	X	15674316	chrX:15674316:A:C	C	A	A	840	15362	ADD	8101	0.886123	0.0724355	0.768841	1.02129	-1.66907	0.0951038	NA
916	NA	ACE2	X	15674699	chrX:15674699:T:C	C	T	T	840	15362	ADD	8101	0.886123	0.0724355	0.768841	1.02129	-1.66907	0.0951038	NA
916	NA	ACE2	X	15675338	chrX:15675338:T:A	A	T	T	840	15362	ADD	8101	0.886123	0.0724355	0.768841	1.02129	-1.66907	0.0951038	NA
429.1	Heart transplant/surgery	TMPRSS2	21	41508700	chr21:41508700:G:A	G	A	A	350	12776	ADD	6563	0.302561	0.716467	0.0742942	1.23217	-1.66857	0.0952031	circulatory system
362.26	Macular puckering of retina	LY6E	8	143018261	chr8:143018261:G:A	G	A	A	82	13982	ADD	7032	2.38635	0.521266	0.859077	6.62883	1.66856	0.0952039	sense organs
528.1	Stomatitis and mucositis	ACE2	X	15675734	chrX:15675734:C:T	C	T	T	18	16206	ADD	8112	0.552308	0.355822	0.274982	1.10932	-1.66839	0.0952387	digestive
701.1	Keratoderma, acquired	LY6E	8	143018261	chr8:143018261:G:A	G	A	A	30	15778	ADD	7904	3.5204	0.754653	0.802102	15.4509	1.66775	0.0953651	dermatologic
871.3	Open wound of foot except toe(s) alone	LY6E	8	143018292	chr8:143018292:C:A	C	A	A	50	15452	ADD	7751	1.77998	0.345747	0.903887	3.50522	1.6677	0.0953759	injuries & poisonings
1010.1	NA	DPP4	2	162074215	chr2:162074215:T:G	G	T	T	58	17648	ADD	8853	1.5139	0.248868	0.929522	2.46566	1.6663	0.0956542	NA
242.3	Exophthalmos	LY6E	8	143017718	chr8:143017718:G:C	C	G	G	72	14014	ADD	7043	1.52887	0.254781	0.927896	2.51907	1.66624	0.0956661	endocrine/metabolic
224	Benign neoplasm of eye	DPP4	2	162073199	chr2:162073199:T:G	T	G	G	10	17442	ADD	8726	2.0344	0.426392	0.882045	4.69226	1.6656	0.0957922	neoplasms
303.3	Psychogenic disorder	ACE2	X	15674316	chrX:15674316:A:C	C	A	A	92	7042	ADD	3567	0.674868	0.236124	0.424845	1.07203	-1.66539	0.0958351	mental disorders
303.3	Psychogenic disorder	ACE2	X	15674699	chrX:15674699:T:C	C	T	T	92	7042	ADD	3567	0.674868	0.236124	0.424845	1.07203	-1.66539	0.0958351	mental disorders
303.3	Psychogenic disorder	ACE2	X	15675244	chrX:15675244:A:G	G	A	A	92	7042	ADD	3567	0.674868	0.236124	0.424845	1.07203	-1.66539	0.0958351	mental disorders
303.3	Psychogenic disorder	ACE2	X	15675338	chrX:15675338:T:A	A	T	T	92	7042	ADD	3567	0.674868	0.236124	0.424845	1.07203	-1.66539	0.0958351	mental disorders
366	Cataract	LY6E	8	143018292	chr8:143018292:C:A	C	A	A	1988	13816	ADD	7902	1.1444	0.0809988	0.976411	1.3413	1.66524	0.0958642	sense organs
599.4	Urinary incontinence	TMPRSS2	21	41508700	chr21:41508700:G:A	G	A	A	1108	10860	ADD	5984	1.43391	0.216463	0.938145	2.19168	1.66499	0.0959147	genitourinary
250.4	Abnormal glucose	DPP4	2	162073199	chr2:162073199:T:G	T	G	G	1884	9124	ADD	5504	0.90031	0.0630834	0.795601	1.0188	-1.66473	0.0959675	endocrine/metabolic
443.9	Peripheral vascular disease, unspecified	LY6E	8	143018292	chr8:143018292:C:A	C	A	A	1038	14400	ADD	7719	0.832079	0.110426	0.670147	1.03314	-1.66472	0.0959695	circulatory system
550	Abdominal hernia	ACE2	X	15674316	chrX:15674316:A:C	C	A	A	894	14972	ADD	7933	0.897683	0.0648446	0.790546	1.01934	-1.66457	0.0959987	digestive
550	Abdominal hernia	ACE2	X	15674699	chrX:15674699:T:C	C	T	T	894	14972	ADD	7933	0.897683	0.0648446	0.790546	1.01934	-1.66457	0.0959987	digestive
550	Abdominal hernia	ACE2	X	15675338	chrX:15675338:T:A	A	T	T	894	14972	ADD	7933	0.897683	0.0648446	0.790546	1.01934	-1.66457	0.0959987	digestive
277.7	Dysmetabolic syndrome X	TMPRSS2	21	41508701	chr21:41508701:T:G	G	T	T	126	16250	ADD	8188	1.69752	0.317904	0.910365	3.16531	1.66456	0.0960002	endocrine/metabolic
530.12	Ulcer of esophagus	DPP4	2	162074215	chr2:162074215:T:G	G	T	T	22	9678	ADD	4850	1.80963	0.35634	0.900062	3.63837	1.66448	0.0960158	digestive
561	Symptoms involving digestive system	TMPRSS2	21	41508700	chr21:41508700:G:A	G	A	A	576	12050	ADD	6313	1.53713	0.258303	0.926492	2.55022	1.66438	0.0960364	digestive
352.1	Trigeminal nerve disorders [CN5]	ACE2	X	15674766	chrX:15674766:C:G	C	G	G	70	14182	ADD	7126	1.40971	0.206324	0.940821	2.11229	1.6643	0.0960525	neurological
722.8	Postlaminectomy syndrome	ACE2	X	15675734	chrX:15675734:C:T	C	T	T	48	13702	ADD	6875	0.667097	0.243253	0.414125	1.0746	-1.66419	0.0960736	musculoskeletal
916	NA	ACE2	X	15675244	chrX:15675244:A:G	G	A	A	840	15362	ADD	8101	0.886453	0.0724408	0.76912	1.02169	-1.66381	0.0961512	NA
736	Other acquired deformities of limbs	DPP4	2	162074215	chr2:162074215:T:G	G	T	T	74	15480	ADD	7777	1.45449	0.225182	0.935481	2.26144	1.66378	0.0961561	musculoskeletal
602.3	Dysplasia of prostate	LY6E	8	143018292	chr8:143018292:C:A	C	A	A	64	15234	ADD	7649	1.5997	0.282398	0.919731	2.78237	1.66366	0.0961796	genitourinary
687.2	Localized superficial swelling, mass, or lump	ACE2	X	15674316	chrX:15674316:A:C	C	A	A	260	17048	ADD	8654	0.804677	0.130639	0.622905	1.03949	-1.66348	0.0962172	dermatologic
687.2	Localized superficial swelling, mass, or lump	ACE2	X	15674699	chrX:15674699:T:C	C	T	T	260	17048	ADD	8654	0.804677	0.130639	0.622905	1.03949	-1.66348	0.0962172	dermatologic
687.2	Localized superficial swelling, mass, or lump	ACE2	X	15675338	chrX:15675338:T:A	A	T	T	260	17048	ADD	8654	0.804677	0.130639	0.622905	1.03949	-1.66348	0.0962172	dermatologic
345.11	Generalized convulsive epilepsy	ACE2	X	15675734	chrX:15675734:C:T	C	T	T	82	14406	ADD	7244	0.739451	0.18146	0.518144	1.05528	-1.66344	0.0962253	neurological
912	Insect bite	DPP4	2	162074215	chr2:162074215:T:G	G	T	T	46	17388	ADD	8717	0.580648	0.326884	0.305963	1.10194	-1.66301	0.0963111	injuries & poisonings
854	Complications of cardiac/vascular device, implant, and graft	ACE2	X	15674316	chrX:15674316:A:C	C	A	A	720	14420	ADD	7570	1.11701	0.0665423	0.98043	1.27262	1.66295	0.0963234	injuries & poisonings
854	Complications of cardiac/vascular device, implant, and graft	ACE2	X	15674699	chrX:15674699:T:C	C	T	T	720	14420	ADD	7570	1.11701	0.0665423	0.98043	1.27262	1.66295	0.0963234	injuries & poisonings
854	Complications of cardiac/vascular device, implant, and graft	ACE2	X	15675338	chrX:15675338:T:A	A	T	T	720	14420	ADD	7570	1.11701	0.0665423	0.98043	1.27262	1.66295	0.0963234	injuries & poisonings
038	Septicemia	LY6E	8	143018292	chr8:143018292:C:A	C	A	A	746	13970	ADD	7358	1.20738	0.11335	0.966854	1.50775	1.66259	0.0963953	infectious diseases
289	Other diseases of blood and blood-forming organs	TMPRSS2	21	41508700	chr21:41508700:G:A	G	A	A	98	13698	ADD	6898	2.16365	0.464345	0.870836	5.37575	1.66212	0.0964884	hematopoietic
687.2	Localized superficial swelling, mass, or lump	ACE2	X	15675244	chrX:15675244:A:G	G	A	A	260	17048	ADD	8654	0.804908	0.130646	0.623075	1.03981	-1.66119	0.0966761	dermatologic
535.2	Atrophic gastritis	TMPRSS2	21	41508701	chr21:41508701:T:G	G	T	T	142	14340	ADD	7241	0.357506	0.619558	0.106149	1.20407	-1.66022	0.0968702	digestive
302	Sexual and gender identity disorders	LY6E	8	143018261	chr8:143018261:G:A	G	A	A	68	7042	ADD	3555	2.76304	0.612363	0.832037	9.17552	1.65969	0.0969774	mental disorders
381.11	Suppurative and unspecified otitis media	LY6E	8	143017718	chr8:143017718:G:C	C	G	G	240	15516	ADD	7878	0.731687	0.188304	0.505872	1.0583	-1.65904	0.0971087	sense organs
361	Retinal detachments and defects	DPP4	2	162073469	chr2:162073469:A:G	A	G	G	120	14542	ADD	7331	1.37538	0.192122	0.943822	2.00428	1.65902	0.0971119	sense organs
426.3	Bundle branch block	LY6E	8	143018261	chr8:143018261:G:A	G	A	A	344	8980	ADD	4662	1.86486	0.375635	0.89311	3.89392	1.65902	0.0971119	circulatory system
701	Other hypertrophic and atrophic conditions of skin	DPP4	2	162074215	chr2:162074215:T:G	G	T	T	464	15778	ADD	8121	0.843446	0.102631	0.689758	1.03138	-1.65894	0.0971274	dermatologic
695	Erythematous conditions	TMPRSS2	21	41508700	chr21:41508700:G:A	G	A	A	756	13610	ADD	7183	1.47661	0.234946	0.931706	2.34019	1.65888	0.0971393	dermatologic
303.4	Somatoform disorder	LY6E	8	143018292	chr8:143018292:C:A	C	A	A	68	7042	ADD	3555	0.416603	0.527839	0.148056	1.17225	-1.65888	0.0971405	mental disorders
327	Sleep disorders	DPP4	2	162073469	chr2:162073469:A:G	A	G	G	1722	10772	ADD	6247	1.10434	0.0598277	0.982146	1.24173	1.65885	0.0971466	neurological
755	Congenital anomalies of limbs	DPP4	2	162074215	chr2:162074215:T:G	G	T	T	28	17192	ADD	8610	0.500295	0.417557	0.2207	1.1341	-1.6586	0.0971974	congenital anomalies
229	Benign neoplasm of unspecified sites	LY6E	8	143017718	chr8:143017718:G:C	C	G	G	56	17594	ADD	8825	1.60972	0.287411	0.916445	2.82746	1.65638	0.0976445	neoplasms
535	Gastritis and duodenitis	DPP4	2	162074215	chr2:162074215:T:G	G	T	T	426	14340	ADD	7383	0.836338	0.107911	0.676905	1.03332	-1.65621	0.0976789	digestive
709.3	Systemic sclerosis	ACE2	X	15675244	chrX:15675244:A:G	G	A	A	66	13458	ADD	6762	1.4541	0.226099	0.933549	2.2649	1.65584	0.0977542	dermatologic
724.8	Other symptoms referable to back	ACE2	X	15675734	chrX:15675734:C:T	C	T	T	152	13702	ADD	6927	0.784902	0.146279	0.589254	1.04551	-1.65572	0.0977791	musculoskeletal
031	Diseases due to other mycobacteria	ACE2	X	15674766	chrX:15674766:C:G	C	G	G	42	13970	ADD	7006	0.67644	0.236235	0.425742	1.07476	-1.65476	0.0979735	infectious diseases
994.21	NA	ACE2	X	15674766	chrX:15674766:C:G	C	G	G	82	15854	ADD	7968	0.756274	0.168823	0.543221	1.05289	-1.6547	0.0979856	NA
389	Hearing loss	ACE2	X	15675244	chrX:15675244:A:G	G	A	A	924	15556	ADD	8240	1.11224	0.064295	0.980555	1.26162	1.65455	0.0980162	sense organs
709.3	Systemic sclerosis	ACE2	X	15674316	chrX:15674316:A:C	C	A	A	66	13458	ADD	6762	1.45368	0.226107	0.933269	2.26429	1.65453	0.0980203	dermatologic
709.3	Systemic sclerosis	ACE2	X	15674699	chrX:15674699:T:C	C	T	T	66	13458	ADD	6762	1.45368	0.226107	0.933269	2.26429	1.65453	0.0980203	dermatologic
709.3	Systemic sclerosis	ACE2	X	15675338	chrX:15675338:T:A	A	T	T	66	13458	ADD	6762	1.45368	0.226107	0.933269	2.26429	1.65453	0.0980203	dermatologic
743.13	Other specified osteoporosis	LY6E	8	143017718	chr8:143017718:G:C	C	G	G	44	15886	ADD	7965	1.66073	0.306594	0.910598	3.02882	1.6545	0.098026	musculoskeletal
601.3	Orchitis and epididymitis	TMPRSS2	21	41508700	chr21:41508700:G:A	G	A	A	84	15234	ADD	7659	2.97448	0.659043	0.817395	10.824	1.65402	0.0981243	genitourinary
358.1	Myasthenia gravis	LY6E	8	143018292	chr8:143018292:C:A	C	A	A	38	15942	ADD	7990	1.88971	0.384819	0.888865	4.01747	1.65382	0.0981643	neurological
495.1	Chronic obstructive asthma	LY6E	8	143018261	chr8:143018261:G:A	G	A	A	244	11930	ADD	6087	2.04232	0.431791	0.876157	4.76063	1.65378	0.0981732	respiratory
291.8	Alteration of consciousness	DPP4	2	162074215	chr2:162074215:T:G	G	T	T	156	14340	ADD	7248	1.30577	0.161333	0.951791	1.79141	1.6537	0.0981883	mental disorders
550	Abdominal hernia	ACE2	X	15675244	chrX:15675244:A:G	G	A	A	894	14972	ADD	7933	0.89832	0.0648497	0.791099	1.02007	-1.6535	0.098229	digestive
853	Complication of colostomy or enterostomy	LY6E	8	143017718	chr8:143017718:G:C	C	G	G	18	14420	ADD	7219	1.98657	0.415179	0.880447	4.48234	1.65329	0.0982724	injuries & poisonings
041.8	H. pylori	TMPRSS2	21	41508701	chr21:41508701:T:G	G	T	T	228	13970	ADD	7099	0.499873	0.419421	0.219709	1.13729	-1.65323	0.0982836	infectious diseases
350.6	Disturbances of sensation of smell and taste	DPP4	2	162073469	chr2:162073469:A:G	A	G	G	124	14758	ADD	7441	1.35603	0.184235	0.945033	1.94576	1.6531	0.0983104	neurological
458.9	Hypotension NOS	TMPRSS2	21	41508701	chr21:41508701:T:G	G	T	T	540	12600	ADD	6570	0.659524	0.251825	0.402602	1.0804	-1.65288	0.0983552	circulatory system
615	Endometriosis	DPP4	2	162073469	chr2:162073469:A:G	A	G	G	276	14548	ADD	7412	0.802529	0.1331	0.618253	1.04173	-1.6528	0.0983725	genitourinary
388	Other disorders of ear	ACE2	X	15675244	chrX:15675244:A:G	G	A	A	106	15556	ADD	7831	1.32303	0.16937	0.949294	1.84389	1.65272	0.0983868	sense organs
338	Pain NEC	ACE2	X	15674316	chrX:15674316:A:C	C	A	A	842	13512	ADD	7177	0.890537	0.0701671	0.776114	1.02183	-1.65221	0.098491	neurological
338	Pain NEC	ACE2	X	15674699	chrX:15674699:T:C	C	T	T	842	13512	ADD	7177	0.890537	0.0701671	0.776114	1.02183	-1.65221	0.098491	neurological
338	Pain NEC	ACE2	X	15675338	chrX:15675338:T:A	A	T	T	842	13512	ADD	7177	0.890537	0.0701671	0.776114	1.02183	-1.65221	0.098491	neurological
[truncated: 24,686 more rows]

## Sheet: EUR
Phencode	Phenotype	category	Gene	CHROM	POS	ID	REF	ALT	A1	CASE_ALLELE_CT	CTRL_ALLELE_CT	TEST	OBS_CT	OR	SE	L95	U95	Z_STAT	P
803	Fracture of upper limb	injuries & poisonings	LY6E	8	143018292	chr8:143018292:C:A	C	A	A	102	12878	ADD	6490	51.4243	0.81258	10.4592	252.836	4.84889	1.24156e-06
290.12	Dementia with cerebral degenerations	mental disorders	LY6E	8	143018292	chr8:143018292:C:A	C	A	A	12	11964	ADD	5988	82.8474	1.0035	11.5903	592.191	4.40158	1.07463e-05
704.8	Other specified diseases of hair and hair follicles	dermatologic	LY6E	8	143017718	chr8:143017718:G:C	C	G	G	62	13212	ADD	6637	4.62247	0.381602	2.18803	9.76549	4.01184	6.02461e-05
446.5	Giant cell arteritis	circulatory system	LY6E	8	143018292	chr8:143018292:C:A	C	A	A	20	9702	ADD	4861	59.623	1.07594	7.23721	491.198	3.7995	0.000144987
509.3	Pulmonary insufficiency or respiratory failure following trauma and surgery	respiratory	LY6E	8	143018292	chr8:143018292:C:A	C	A	A	28	10258	ADD	5143	42.8571	0.995664	6.08853	301.671	3.77424	0.000160498
277	Other disorders of metabolism	endocrine/metabolic	DPP4	2	162074215	chr2:162074215:T:G	G	T	T	84	13008	ADD	6546	0.367226	0.271267	0.21579	0.624938	-3.69295	0.000221669
597.1	Urethral stricture (not specified as infectious)	genitourinary	LY6E	8	143018292	chr8:143018292:C:A	C	A	A	46	13028	ADD	6537	34.7808	0.983008	5.06527	238.824	3.61042	0.000305706
559	Ileostomy status	digestive	LY6E	8	143017718	chr8:143017718:G:C	C	G	G	32	10794	ADD	5413	5.38885	0.471531	2.13859	13.5789	3.57205	0.000354199
597	Other disorders of urethra and urinary tract	genitourinary	LY6E	8	143018292	chr8:143018292:C:A	C	A	A	58	13028	ADD	6543	30.7269	0.963582	4.64853	203.105	3.55459	0.00037857
289.3	Personal history of diseases of blood and blood-forming organs	hematopoietic	LY6E	8	143017718	chr8:143017718:G:C	C	G	G	12	11700	ADD	5856	6.66867	0.541761	2.30617	19.2836	3.50232	0.000461229
279.11	Deficiency of humoral immunity	endocrine/metabolic	DPP4	2	162073469	chr2:162073469:A:G	A	G	G	46	12876	ADD	6461	2.6168	0.275189	1.52591	4.48757	3.49561	0.000472985
803.3	Fracture of clavicle or scapula	injuries & poisonings	LY6E	8	143018292	chr8:143018292:C:A	C	A	A	38	12878	ADD	6458	28.8919	0.978472	4.2452	196.631	3.43756	0.000586976
728.7	Fasciitis	musculoskeletal	LY6E	8	143017718	chr8:143017718:G:C	C	G	G	86	11742	ADD	5914	3.63555	0.37967	1.72741	7.65148	3.39969	0.000674618
598.9	Other nonspecific findings on examination of urine	genitourinary	TMPRSS2	21	41508701	chr21:41508701:T:G	G	T	T	26	13806	ADD	6916	3.69171	0.388097	1.72535	7.89907	3.36536	0.000764434
599.1	Urinary obstruction	genitourinary	TMPRSS2	21	41508700	chr21:41508700:G:A	G	A	A	28	11058	ADD	5543	3.50155	0.377112	1.6721	7.33261	3.32316	0.000890034
250.4	Abnormal glucose	endocrine/metabolic	TMPRSS2	21	41508700	chr21:41508700:G:A	G	A	A	654	8660	ADD	4657	1.54852	0.131666	1.1963	2.00443	3.32125	0.000896158
733.8	Malunion and nonunion of fracture	musculoskeletal	LY6E	8	143018292	chr8:143018292:C:A	C	A	A	30	12258	ADD	6144	28.6512	1.02048	3.8771	211.728	3.28786	0.00100954
250.14	Type 1 diabetes with neurological manifestations	endocrine/metabolic	TMPRSS2	21	41508700	chr21:41508700:G:A	G	A	A	56	8660	ADD	4358	2.7962	0.314594	1.50933	5.18026	3.26853	0.00108108
395.4	Nonrheumatic pulmonary valve disorders	circulatory system	LY6E	8	143017718	chr8:143017718:G:C	C	G	G	44	8012	ADD	4028	4.35335	0.452906	1.79188	10.5764	3.24779	0.00116304
180.3	Cervical intraepithelial neoplasia [CIN] [Cervical dysplasia]	neoplasms	TMPRSS2	21	41508700	chr21:41508700:G:A	G	A	A	28	12520	ADD	6274	3.51689	0.396158	1.61789	7.64486	3.17443	0.0015013
110.12	Althete's foot	infectious diseases	LY6E	8	143018261	chr8:143018261:G:A	G	A	A	58	12460	ADD	6259	2.76743	0.320968	1.47526	5.19141	3.17141	0.001517
707	Chronic ulcer of skin	dermatologic	LY6E	8	143017718	chr8:143017718:G:C	C	G	G	318	13214	ADD	6766	2.2078	0.251744	1.34795	3.61612	3.14604	0.00165499
263	Other nutritional deficiency	endocrine/metabolic	DPP4	2	162074215	chr2:162074215:T:G	G	T	T	50	11208	ADD	5629	0.33043	0.353615	0.165228	0.660811	-3.13154	0.00173892
250.4	Abnormal glucose	endocrine/metabolic	TMPRSS2	21	41508701	chr21:41508701:T:G	G	T	T	654	8660	ADD	4657	1.44666	0.117918	1.14814	1.8228	3.13147	0.00173934
420	Carditis	circulatory system	TMPRSS2	21	41508701	chr21:41508701:T:G	G	T	T	408	9734	ADD	5071	1.54866	0.140247	1.17646	2.03861	3.1187	0.0018165
279.11	Deficiency of humoral immunity	endocrine/metabolic	DPP4	2	162073222	chr2:162073222:G:A	G	A	A	46	12876	ADD	6461	2.3291	0.27167	1.36755	3.96674	3.11217	0.00185721
362	Other retinal disorders	sense organs	ACE2	NA	15674316	chrX:15674316:A:C	C	A	A	256	12398	ADD	6327	1.39214	0.106738	1.12934	1.71608	3.09953	0.00193828
362	Other retinal disorders	sense organs	ACE2	NA	15675244	chrX:15675244:A:G	G	A	A	256	12398	ADD	6327	1.39177	0.106676	1.12918	1.71542	3.09888	0.00194254
362	Other retinal disorders	sense organs	ACE2	NA	15675338	chrX:15675338:T:A	A	T	T	256	12398	ADD	6327	1.39177	0.106676	1.12918	1.71542	3.09888	0.00194254
279.11	Deficiency of humoral immunity	endocrine/metabolic	DPP4	2	162073199	chr2:162073199:T:G	T	G	G	46	12876	ADD	6461	2.31732	0.271651	1.36068	3.94654	3.09372	0.00197663
457.3	Encounter for long-term (current) use of aspirin	circulatory system	LY6E	8	143017718	chr8:143017718:G:C	C	G	G	844	8826	ADD	4835	1.7565	0.182372	1.2286	2.51121	3.08886	0.00200925
362	Other retinal disorders	sense organs	ACE2	NA	15674699	chrX:15674699:T:C	C	T	T	256	12398	ADD	6327	1.39018	0.106671	1.12791	1.71345	3.08832	0.00201294
500.2	Pneumoconiosis	respiratory	LY6E	8	143017718	chr8:143017718:G:C	C	G	G	38	10258	ADD	5148	4.47276	0.485808	1.72606	11.5903	3.08354	0.00204555
458	Hypotension	circulatory system	ACE2	NA	15675244	chrX:15675244:A:G	G	A	A	336	10544	ADD	5440	0.766639	0.0868704	0.646617	0.90894	-3.05903	0.00222056
458	Hypotension	circulatory system	ACE2	NA	15675338	chrX:15675338:T:A	A	T	T	336	10544	ADD	5440	0.766639	0.0868704	0.646617	0.90894	-3.05903	0.00222056
695	Erythematous conditions	dermatologic	LY6E	8	143018261	chr8:143018261:G:A	G	A	A	254	12078	ADD	6166	2.00051	0.227051	1.28196	3.12182	3.05395	0.00225848
362	Other retinal disorders	sense organs	ACE2	NA	15675734	chrX:15675734:C:T	C	T	T	256	12398	ADD	6327	0.722653	0.106612	0.586383	0.890591	-3.0468	0.00231293
362	Other retinal disorders	sense organs	ACE2	NA	15674766	chrX:15674766:C:G	C	G	G	256	12398	ADD	6327	0.723305	0.106606	0.586918	0.891384	-3.03851	0.00237751
371.1	Uveitis, noninfectious or NOS	sense organs	LY6E	8	143017718	chr8:143017718:G:C	C	G	G	30	12910	ADD	6470	4.0381	0.463676	1.6274	10.0198	3.01024	0.00261045
250.2	Type 2 diabetes	endocrine/metabolic	DPP4	2	162074215	chr2:162074215:T:G	G	T	T	2982	8660	ADD	5821	1.1407	0.0439149	1.04662	1.24323	2.99765	0.00272073
174	Breast cancer	neoplasms	TMPRSS2	21	41508701	chr21:41508701:T:G	G	T	T	238	12630	ADD	6434	1.74466	0.185971	1.21175	2.51194	2.99272	0.00276507
458	Hypotension	circulatory system	ACE2	NA	15674699	chrX:15674699:T:C	C	T	T	336	10544	ADD	5440	0.771356	0.086767	0.650727	0.914347	-2.99198	0.00277172
458	Hypotension	circulatory system	ACE2	NA	15674316	chrX:15674316:A:C	C	A	A	336	10544	ADD	5440	0.771636	0.0867646	0.650966	0.914675	-2.98788	0.00280922
180.3	Cervical intraepithelial neoplasia [CIN] [Cervical dysplasia]	neoplasms	TMPRSS2	21	41508701	chr21:41508701:T:G	G	T	T	28	12520	ADD	6274	3.0423	0.372492	1.46601	6.31347	2.98695	0.00281779
290	Delirium dementia and amnestic and other cognitive disorders	mental disorders	LY6E	8	143018292	chr8:143018292:C:A	C	A	A	72	11964	ADD	6018	18.4686	0.976398	2.72473	125.183	2.98656	0.00282134
550.1	Inguinal hernia	digestive	LY6E	8	143018292	chr8:143018292:C:A	C	A	A	284	12220	ADD	6252	12.6003	0.848548	2.38835	66.4765	2.98595	0.00282696
573.6	Nonspecific elevation of levels of transaminase or lactic acid dehydrogenase [LDH]	digestive	DPP4	2	162074215	chr2:162074215:T:G	G	T	T	144	11600	ADD	5872	0.572218	0.187997	0.395857	0.827151	-2.96938	0.00298397
276.5	Hypovolemia	endocrine/metabolic	DPP4	2	162073199	chr2:162073199:T:G	T	G	G	414	9148	ADD	4781	0.716792	0.112914	0.574487	0.894346	-2.94888	0.00318932
290.1	Dementias	mental disorders	LY6E	8	143017718	chr8:143017718:G:C	C	G	G	78	11964	ADD	6021	2.97715	0.371027	1.43874	6.16055	2.9404	0.00327791
721.1	Spondylosis without myelopathy	musculoskeletal	DPP4	2	162073469	chr2:162073469:A:G	A	G	G	418	11830	ADD	6124	0.725325	0.109515	0.585211	0.898984	-2.93234	0.00336415
446	Polyarteritis nodosa and allied conditions	circulatory system	LY6E	8	143018292	chr8:143018292:C:A	C	A	A	52	9702	ADD	4877	21.3137	1.04631	2.74179	165.685	2.92393	0.00345641
741.4	Joint effusions	musculoskeletal	TMPRSS2	21	41508701	chr21:41508701:T:G	G	T	T	84	13062	ADD	6573	2.17585	0.26608	1.29164	3.66536	2.92175	0.00348068
276.5	Hypovolemia	endocrine/metabolic	DPP4	2	162073222	chr2:162073222:G:A	G	A	A	414	9148	ADD	4781	0.719657	0.112853	0.576853	0.897814	-2.91513	0.00355543
427.42	Cardiac arrest	circulatory system	DPP4	2	162074215	chr2:162074215:T:G	G	T	T	180	3868	ADD	2024	1.57499	0.155901	1.16031	2.13787	2.9137	0.00357177
557.1	Celiac disease	digestive	DPP4	2	162073469	chr2:162073469:A:G	A	G	G	26	10794	ADD	5410	2.38903	0.299522	1.32821	4.29709	2.90759	0.00364227
598.9	Other nonspecific findings on examination of urine	genitourinary	TMPRSS2	21	41508700	chr21:41508700:G:A	G	A	A	26	13806	ADD	6916	3.41958	0.423709	1.49043	7.84576	2.9018	0.00371031
279.1	Immunity deficiency	endocrine/metabolic	DPP4	2	162073469	chr2:162073469:A:G	A	G	G	48	12876	ADD	6462	2.1684	0.266763	1.2855	3.65771	2.90141	0.00371482
458	Hypotension	circulatory system	ACE2	NA	15675734	chrX:15675734:C:T	C	T	T	336	10544	ADD	5440	1.28453	0.0865491	1.08411	1.522	2.89305	0.0038152
573.6	Nonspecific elevation of levels of transaminase or lactic acid dehydrogenase [LDH]	digestive	DPP4	2	162073469	chr2:162073469:A:G	A	G	G	144	11600	ADD	5872	1.59096	0.161642	1.15896	2.18398	2.87262	0.00407079
456	Chronic venous insufficiency [CVI]	circulatory system	LY6E	8	143017718	chr8:143017718:G:C	C	G	G	208	8826	ADD	4517	2.41139	0.307385	1.32014	4.40468	2.86352	0.0041896
279.11	Deficiency of humoral immunity	endocrine/metabolic	DPP4	2	162074215	chr2:162074215:T:G	G	T	T	46	12876	ADD	6461	0.359166	0.357673	0.178174	0.724013	-2.86287	0.00419821
480.12	Pseudomonal pneumonia	respiratory	LY6E	8	143017718	chr8:143017718:G:C	C	G	G	64	11526	ADD	5795	3.4681	0.435088	1.47824	8.13651	2.85829	0.00425933
279.1	Immunity deficiency	endocrine/metabolic	DPP4	2	162073222	chr2:162073222:G:A	G	A	A	48	12876	ADD	6462	2.14844	0.268167	1.27016	3.63402	2.85175	0.00434799
721.1	Spondylosis without myelopathy	musculoskeletal	DPP4	2	162073199	chr2:162073199:T:G	T	G	G	418	11830	ADD	6124	0.728065	0.111316	0.585353	0.90557	-2.85103	0.00435774
290.1	Dementias	mental disorders	LY6E	8	143018292	chr8:143018292:C:A	C	A	A	78	11964	ADD	6021	16.4261	0.983126	2.39164	112.817	2.84691	0.00441456
279.1	Immunity deficiency	endocrine/metabolic	DPP4	2	162073199	chr2:162073199:T:G	T	G	G	48	12876	ADD	6462	2.1442	0.268295	1.26734	3.62775	2.84301	0.00446891
276.1	Electrolyte imbalance	endocrine/metabolic	ACE2	NA	15674766	chrX:15674766:C:G	C	G	G	1404	9148	ADD	5276	0.878538	0.0457393	0.803206	0.960934	-2.83119	0.00463759
721.1	Spondylosis without myelopathy	musculoskeletal	DPP4	2	162073222	chr2:162073222:G:A	G	A	A	418	11830	ADD	6124	0.72998	0.111267	0.586948	0.907866	-2.82866	0.00467428
420	Carditis	circulatory system	TMPRSS2	21	41508700	chr21:41508700:G:A	G	A	A	408	9734	ADD	5071	1.56376	0.158091	1.1471	2.13175	2.82805	0.00468325
458	Hypotension	circulatory system	ACE2	NA	15674766	chrX:15674766:C:G	C	G	G	336	10544	ADD	5440	1.27573	0.0864561	1.07688	1.5113	2.81672	0.00485175
573.6	Nonspecific elevation of levels of transaminase or lactic acid dehydrogenase [LDH]	digestive	DPP4	2	162073222	chr2:162073222:G:A	G	A	A	144	11600	ADD	5872	1.58342	0.163269	1.14979	2.18057	2.81488	0.00487949
250	Diabetes mellitus	endocrine/metabolic	DPP4	2	162074215	chr2:162074215:T:G	G	T	T	2862	8660	ADD	5761	1.13322	0.0445955	1.03837	1.23673	2.80434	0.0050419
276.1	Electrolyte imbalance	endocrine/metabolic	ACE2	NA	15675734	chrX:15675734:C:T	C	T	T	1404	9148	ADD	5276	0.879778	0.0457257	0.804361	0.962265	-2.80118	0.0050916
509.3	Pulmonary insufficiency or respiratory failure following trauma and surgery	respiratory	LY6E	8	143017718	chr8:143017718:G:C	C	G	G	28	10258	ADD	5143	4.41288	0.530312	1.5607	12.4774	2.79935	0.00512059
573.6	Nonspecific elevation of levels of transaminase or lactic acid dehydrogenase [LDH]	digestive	DPP4	2	162073199	chr2:162073199:T:G	T	G	G	144	11600	ADD	5872	1.57955	0.163389	1.14672	2.17575	2.79785	0.00514437
727	Other disorders of synovium, tendon, and bursa	musculoskeletal	ACE2	NA	15674699	chrX:15674699:T:C	C	T	T	314	11742	ADD	6028	0.766613	0.0951451	0.636193	0.92377	-2.79334	0.00521662
401.2	Hypertensive heart and/or renal disease	circulatory system	ACE2	NA	15675734	chrX:15675734:C:T	C	T	T	1428	3936	ADD	2682	0.863897	0.0523765	0.779613	0.957293	-2.79327	0.00521776
426.32	Left bundle branch block	circulatory system	TMPRSS2	21	41508700	chr21:41508700:G:A	G	A	A	626	3868	ADD	2247	1.48522	0.141843	1.12475	1.96123	2.78874	0.00529129
727	Other disorders of synovium, tendon, and bursa	musculoskeletal	ACE2	NA	15675244	chrX:15675244:A:G	G	A	A	314	11742	ADD	6028	0.767044	0.0951573	0.636535	0.924311	-2.78708	0.00531849
727	Other disorders of synovium, tendon, and bursa	musculoskeletal	ACE2	NA	15675338	chrX:15675338:T:A	A	T	T	314	11742	ADD	6028	0.767044	0.0951573	0.636535	0.924311	-2.78708	0.00531849
717	Polymyalgia Rheumatica	musculoskeletal	LY6E	8	143018292	chr8:143018292:C:A	C	A	A	96	13754	ADD	6925	15.2313	0.977557	2.24202	103.475	2.78588	0.00533829
727	Other disorders of synovium, tendon, and bursa	musculoskeletal	ACE2	NA	15674316	chrX:15674316:A:C	C	A	A	314	11742	ADD	6028	0.767237	0.0951484	0.636706	0.924528	-2.7847	0.00535778
401.2	Hypertensive heart and/or renal disease	circulatory system	ACE2	NA	15674766	chrX:15674766:C:G	C	G	G	1428	3936	ADD	2682	0.865139	0.0523806	0.780727	0.958677	-2.76563	0.00568128
751.21	Cystic kidney disease	congenital anomalies	LY6E	8	143018261	chr8:143018261:G:A	G	A	A	140	13448	ADD	6794	2.16723	0.281303	1.2487	3.76141	2.74953	0.00596811
736	Other acquired deformities of limbs	musculoskeletal	LY6E	8	143018261	chr8:143018261:G:A	G	A	A	20	13062	ADD	6541	3.46167	0.453836	1.42226	8.42543	2.73612	0.00621678
287.31	Primary thrombocytopenia	hematopoietic	LY6E	8	143018292	chr8:143018292:C:A	C	A	A	42	7590	ADD	3816	15.9268	1.01261	2.18875	115.893	2.73354	0.00626568
375.1	Dry eyes	sense organs	DPP4	2	162074215	chr2:162074215:T:G	G	T	T	176	12886	ADD	6531	1.52587	0.155129	1.12583	2.06806	2.72397	0.00645033
250.7	Diabetic retinopathy	endocrine/metabolic	ACE2	NA	15674316	chrX:15674316:A:C	C	A	A	156	12398	ADD	6277	1.42518	0.13029	1.10399	1.8398	2.71929	0.00654215
250.7	Diabetic retinopathy	endocrine/metabolic	ACE2	NA	15674699	chrX:15674699:T:C	C	T	T	156	12398	ADD	6277	1.42425	0.130265	1.10333	1.83852	2.71481	0.00663139
276.5	Hypovolemia	endocrine/metabolic	DPP4	2	162073469	chr2:162073469:A:G	A	G	G	414	9148	ADD	4781	0.742518	0.110088	0.598412	0.921327	-2.70428	0.00684519
263	Other nutritional deficiency	endocrine/metabolic	LY6E	8	143018261	chr8:143018261:G:A	G	A	A	50	11208	ADD	5629	2.87812	0.391403	1.33643	6.19828	2.70089	0.00691547
727	Other disorders of synovium, tendon, and bursa	musculoskeletal	ACE2	NA	15675734	chrX:15675734:C:T	C	T	T	314	11742	ADD	6028	1.29093	0.0948536	1.07192	1.55469	2.6922	0.00709826
727	Other disorders of synovium, tendon, and bursa	musculoskeletal	ACE2	NA	15674766	chrX:15674766:C:G	C	G	G	314	11742	ADD	6028	1.29083	0.0948477	1.07185	1.55454	2.6915	0.00711316
1015	Effects of other external causes	NULL	TMPRSS2	21	41508701	chr21:41508701:T:G	G	T	T	250	13190	ADD	6720	0.473361	0.278204	0.2744	0.816582	-2.68831	0.00718154
565.1	Anal and rectal polyp	digestive	LY6E	8	143017718	chr8:143017718:G:C	C	G	G	14	12790	ADD	6402	4.99882	0.600219	1.54156	16.2097	2.68102	0.00733971
250.7	Diabetic retinopathy	endocrine/metabolic	ACE2	NA	15674766	chrX:15674766:C:G	C	G	G	156	12398	ADD	6277	0.705651	0.130529	0.546366	0.911374	-2.67094	0.00756398
276.1	Electrolyte imbalance	endocrine/metabolic	ACE2	NA	15674316	chrX:15674316:A:C	C	A	A	1404	9148	ADD	5276	1.12955	0.0456698	1.03284	1.23532	2.66739	0.00764428
327.7	Sleep related movement disorders	neurological	ACE2	NA	15674766	chrX:15674766:C:G	C	G	G	198	9740	ADD	4969	1.36897	0.117749	1.08684	1.72434	2.6672	0.0076486
401.2	Hypertensive heart and/or renal disease	circulatory system	ACE2	NA	15675244	chrX:15675244:A:G	G	A	A	1428	3936	ADD	2682	1.14981	0.0523624	1.03766	1.27408	2.66596	0.00767678
401.2	Hypertensive heart and/or renal disease	circulatory system	ACE2	NA	15675338	chrX:15675338:T:A	A	T	T	1428	3936	ADD	2682	1.14981	0.0523624	1.03766	1.27408	2.66596	0.00767678
603.1	Hydrocele	genitourinary	LY6E	8	143018261	chr8:143018261:G:A	G	A	A	38	11416	ADD	5727	2.77933	0.383846	1.30982	5.89754	2.66308	0.00774296
327.7	Sleep related movement disorders	neurological	ACE2	NA	15675734	chrX:15675734:C:T	C	T	T	198	9740	ADD	4969	1.36753	0.117701	1.0858	1.72236	2.65936	0.00782894
587	Kidney replaced by transpant	genitourinary	ACE2	NA	15675734	chrX:15675734:C:T	C	T	T	290	9094	ADD	4692	0.772706	0.0970703	0.638834	0.934632	-2.65639	0.0078983
276.1	Electrolyte imbalance	endocrine/metabolic	ACE2	NA	15674699	chrX:15674699:T:C	C	T	T	1404	9148	ADD	5276	1.12882	0.0456664	1.03218	1.23452	2.65348	0.00796668
272.12	Hyperglyceridemia	endocrine/metabolic	TMPRSS2	21	41508700	chr21:41508700:G:A	G	A	A	148	4236	ADD	2192	1.90265	0.242518	1.18284	3.06048	2.65236	0.00799315
153.3	Malignant neoplasm of rectum, rectosigmoid junction, and anus	neoplasms	LY6E	8	143017718	chr8:143017718:G:C	C	G	G	44	11876	ADD	5960	3.44315	0.466669	1.37952	8.59379	2.64939	0.00806378
587	Kidney replaced by transpant	genitourinary	ACE2	NA	15674766	chrX:15674766:C:G	C	G	G	290	9094	ADD	4692	0.773636	0.0970707	0.639602	0.935758	-2.64399	0.00819362
759.1	Anomalies of endocrine glands, congenital	congenital anomalies	DPP4	2	162074215	chr2:162074215:T:G	G	T	T	16	13584	ADD	6800	3.16115	0.436009	1.34497	7.4298	2.63971	0.00829774
276.1	Electrolyte imbalance	endocrine/metabolic	ACE2	NA	15675244	chrX:15675244:A:G	G	A	A	1404	9148	ADD	5276	1.12801	0.04565	1.03147	1.23359	2.63868	0.00832298
276.1	Electrolyte imbalance	endocrine/metabolic	ACE2	NA	15675338	chrX:15675338:T:A	A	T	T	1404	9148	ADD	5276	1.12801	0.04565	1.03147	1.23359	2.63868	0.00832298
401.2	Hypertensive heart and/or renal disease	circulatory system	ACE2	NA	15674316	chrX:15674316:A:C	C	A	A	1428	3936	ADD	2682	1.14816	0.0523669	1.03616	1.27226	2.63828	0.00833268
401.2	Hypertensive heart and/or renal disease	circulatory system	ACE2	NA	15674699	chrX:15674699:T:C	C	T	T	1428	3936	ADD	2682	1.14816	0.0523669	1.03616	1.27226	2.63828	0.00833268
737	Curvature of spine	musculoskeletal	LY6E	8	143018261	chr8:143018261:G:A	G	A	A	84	13062	ADD	6573	2.34346	0.323877	1.24215	4.42123	2.62949	0.00855142
250.41	Impaired fasting glucose	endocrine/metabolic	TMPRSS2	21	41508701	chr21:41508701:T:G	G	T	T	432	8660	ADD	4546	1.44659	0.140681	1.09799	1.90587	2.62447	0.00867849
790.6	Other abnormal blood chemistry	symptoms	LY6E	8	143017718	chr8:143017718:G:C	C	G	G	482	12620	ADD	6551	1.80764	0.225603	1.16166	2.81285	2.62418	0.00868569
418	Nonspecific chest pain	circulatory system	ACE2	NA	15675734	chrX:15675734:C:T	C	T	T	2094	9856	ADD	5975	1.10648	0.0386867	1.02568	1.19364	2.61548	0.00891014
618.1	Prolapse of vaginal walls	genitourinary	DPP4	2	162074215	chr2:162074215:T:G	G	T	T	76	13692	ADD	6884	1.78847	0.222688	1.15592	2.76715	2.61064	0.00903718
327.7	Sleep related movement disorders	neurological	ACE2	NA	15674699	chrX:15674699:T:C	C	T	T	198	9740	ADD	4969	0.735477	0.117729	0.583926	0.926361	-2.60969	0.00906256
262	Mineral deficiency NEC	endocrine/metabolic	LY6E	8	143017718	chr8:143017718:G:C	C	G	G	42	11208	ADD	5625	3.34966	0.463502	1.35041	8.30873	2.6081	0.00910471
327.7	Sleep related movement disorders	neurological	ACE2	NA	15674316	chrX:15674316:A:C	C	A	A	198	9740	ADD	4969	0.736036	0.117732	0.584366	0.92707	-2.60317	0.00923661
250.7	Diabetic retinopathy	endocrine/metabolic	ACE2	NA	15675244	chrX:15675244:A:G	G	A	A	156	12398	ADD	6277	1.40056	0.129461	1.08669	1.8051	2.60213	0.00926472
250.7	Diabetic retinopathy	endocrine/metabolic	ACE2	NA	15675338	chrX:15675338:T:A	A	T	T	156	12398	ADD	6277	1.40056	0.129461	1.08669	1.8051	2.60213	0.00926472
327.1	Hypersomnia	neurological	LY6E	8	143017718	chr8:143017718:G:C	C	G	G	110	9740	ADD	4925	2.65658	0.375646	1.27225	5.54719	2.60096	0.00929632
250.41	Impaired fasting glucose	endocrine/metabolic	TMPRSS2	21	41508700	chr21:41508700:G:A	G	A	A	432	8660	ADD	4546	1.50965	0.158502	1.10652	2.05964	2.59855	0.0093618
585	Renal failure	genitourinary	ACE2	NA	15675734	chrX:15675734:C:T	C	T	T	2532	9094	ADD	5813	0.911381	0.035736	0.849731	0.977504	-2.59666	0.00941344
418	Nonspecific chest pain	circulatory system	ACE2	NA	15674766	chrX:15674766:C:G	C	G	G	2094	9856	ADD	5975	1.10566	0.0386865	1.02492	1.19275	2.59622	0.00942552
573.2	Liver replaced by transplant	digestive	LY6E	8	143017718	chr8:143017718:G:C	C	G	G	134	11600	ADD	5867	2.52563	0.357039	1.25446	5.0849	2.59493	0.00946099
327.7	Sleep related movement disorders	neurological	ACE2	NA	15675244	chrX:15675244:A:G	G	A	A	198	9740	ADD	4969	0.736898	0.117697	0.585091	0.928093	-2.59399	0.00948687
327.7	Sleep related movement disorders	neurological	ACE2	NA	15675338	chrX:15675338:T:A	A	T	T	198	9740	ADD	4969	0.736898	0.117697	0.585091	0.928093	-2.59399	0.00948687
350	Abnormal movement	neurological	LY6E	8	143018261	chr8:143018261:G:A	G	A	A	216	12670	ADD	6443	1.8756	0.243581	1.1636	3.02327	2.58201	0.00982274
798	Malaise and fatigue	symptoms	TMPRSS2	21	41508700	chr21:41508700:G:A	G	A	A	2900	8940	ADD	5920	1.21318	0.0748678	1.04761	1.40493	2.58119	0.00984613
513.32	Orthopnea	respiratory	LY6E	8	143018292	chr8:143018292:C:A	C	A	A	14	13376	ADD	6695	56.6937	1.56825	2.62203	1225.84	2.57463	0.0100348
585	Renal failure	genitourinary	ACE2	NA	15674766	chrX:15674766:C:G	C	G	G	2532	9094	ADD	5813	0.912548	0.0357402	0.850812	0.978764	-2.56055	0.0104506
250.7	Diabetic retinopathy	endocrine/metabolic	ACE2	NA	15675734	chrX:15675734:C:T	C	T	T	156	12398	ADD	6277	0.717554	0.129877	0.556292	0.925565	-2.55554	0.0106025
418	Nonspecific chest pain	circulatory system	ACE2	NA	15675244	chrX:15675244:A:G	G	A	A	2094	9856	ADD	5975	0.905861	0.0387064	0.839681	0.977256	-2.55435	0.0106388
418	Nonspecific chest pain	circulatory system	ACE2	NA	15675338	chrX:15675338:T:A	A	T	T	2094	9856	ADD	5975	0.905861	0.0387064	0.839681	0.977256	-2.55435	0.0106388
707.1	Decubitus ulcer	dermatologic	LY6E	8	143017718	chr8:143017718:G:C	C	G	G	254	13214	ADD	6734	1.96465	0.264766	1.16927	3.30107	2.55061	0.0107536
519.8	Other diseases of respiratory system, NEC	respiratory	LY6E	8	143017718	chr8:143017718:G:C	C	G	G	82	13018	ADD	6550	2.42322	0.347327	1.22673	4.78672	2.54831	0.0108247
726.1	Enthesopathy	musculoskeletal	DPP4	2	162074215	chr2:162074215:T:G	G	T	T	288	11742	ADD	6015	0.719612	0.13054	0.557163	0.929424	-2.52063	0.0117144
526.1	Cysts of the jaws	digestive	LY6E	8	143018292	chr8:143018292:C:A	C	A	A	4	13238	ADD	6621	45.2138	1.51235	2.33323	876.161	2.52019	0.0117292
599.1	Urinary obstruction	genitourinary	TMPRSS2	21	41508701	chr21:41508701:T:G	G	T	T	28	11058	ADD	5543	2.48921	0.36292	1.2222	5.06966	2.51285	0.011976
736.6	Unequal leg length (acquired)	musculoskeletal	LY6E	8	143018261	chr8:143018261:G:A	G	A	A	6	13062	ADD	6534	3.36311	0.482673	1.30584	8.66149	2.51281	0.0119774
519	Other diseases of respiratory system, not elsewhere classified	respiratory	LY6E	8	143018261	chr8:143018261:G:A	G	A	A	212	13018	ADD	6615	1.8048	0.235065	1.13852	2.861	2.51186	0.0120098
624	Symptoms involving female genital tract	genitourinary	LY6E	8	143018292	chr8:143018292:C:A	C	A	A	4	13430	ADD	6717	41.6413	1.48764	2.25551	768.784	2.50672	0.0121857
194	Cancer of other endocrine glands	neoplasms	LY6E	8	143018292	chr8:143018292:C:A	C	A	A	4	13558	ADD	6781	44.7427	1.51825	2.28236	877.123	2.50349	0.0122975
509.3	Pulmonary insufficiency or respiratory failure following trauma and surgery	respiratory	LY6E	8	143018261	chr8:143018261:G:A	G	A	A	28	10258	ADD	5143	3.21604	0.466683	1.28849	8.02717	2.50309	0.0123114
275.53	Disorders of phosphorus metabolism	endocrine/metabolic	LY6E	8	143018261	chr8:143018261:G:A	G	A	A	134	11974	ADD	6054	2.07985	0.292704	1.17187	3.69132	2.50182	0.0123555
426.4	Anomalous atrioventricular excitation	circulatory system	LY6E	8	143018261	chr8:143018261:G:A	G	A	A	52	3868	ADD	1960	2.78763	0.410236	1.2475	6.22914	2.49902	0.0124536
740.3	Osteoarthrosis involving more than one site, but not specified as generalized	musculoskeletal	LY6E	8	143018292	chr8:143018292:C:A	C	A	A	10	11290	ADD	5650	41.7236	1.49617	2.22248	783.296	2.49374	0.0126405
428.4	Heart failure with preserved EF [Diastolic heart failure]	circulatory system	LY6E	8	143018261	chr8:143018261:G:A	G	A	A	960	6532	ADD	3746	1.49694	0.161933	1.08985	2.05609	2.4913	0.0127275
592.13	Chronic interstitial cystitis	genitourinary	LY6E	8	143017718	chr8:143017718:G:C	C	G	G	24	11260	ADD	5642	4.47026	0.60112	1.37613	14.5214	2.49109	0.0127351
250.41	Impaired fasting glucose	endocrine/metabolic	LY6E	8	143018261	chr8:143018261:G:A	G	A	A	432	8660	ADD	4546	0.42729	0.341525	0.218785	0.834505	-2.4897	0.0127853
585.3	Chronic renal failure [CKD]	genitourinary	ACE2	NA	15675734	chrX:15675734:C:T	C	T	T	2154	9094	ADD	5624	0.910135	0.0378643	0.845036	0.980248	-2.48685	0.012888
290.12	Dementia with cerebral degenerations	mental disorders	LY6E	8	143017718	chr8:143017718:G:C	C	G	G	12	11964	ADD	5988	4.61707	0.616661	1.37868	15.4621	2.48072	0.0131119
537.1	Lesions of stomach and duodenum	digestive	LY6E	8	143018292	chr8:143018292:C:A	C	A	A	18	12616	ADD	6317	39.4036	1.48174	2.1591	719.114	2.47942	0.0131598
395.6	Heart valve replaced	circulatory system	LY6E	8	143017718	chr8:143017718:G:C	C	G	G	1296	8012	ADD	4654	1.50477	0.164839	1.08933	2.07865	2.47901	0.0131746
418	Nonspecific chest pain	circulatory system	ACE2	NA	15674699	chrX:15674699:T:C	C	T	T	2094	9856	ADD	5975	0.908614	0.0387057	0.842235	0.980225	-2.47598	0.0132871
686	Other local infections of skin and subcutaneous tissue	dermatologic	TMPRSS2	21	41508701	chr21:41508701:T:G	G	T	T	58	12356	ADD	6207	2.1409	0.307595	1.17158	3.91221	2.47477	0.0133321
707.3	Chronic ulcer of unspecified site	dermatologic	LY6E	8	143017718	chr8:143017718:G:C	C	G	G	34	13214	ADD	6624	3.03894	0.44928	1.25978	7.33077	2.47397	0.0133619
743.11	Osteoporosis NOS	musculoskeletal	LY6E	8	143017718	chr8:143017718:G:C	C	G	G	652	12194	ADD	6423	1.69827	0.214234	1.11596	2.58441	2.4721	0.0134322
418	Nonspecific chest pain	circulatory system	ACE2	NA	15674316	chrX:15674316:A:C	C	A	A	2094	9856	ADD	5975	0.90928	0.0387077	0.842849	0.980947	-2.45693	0.0140128
386.9	Dizziness and giddiness (Light-headedness and vertigo)	sense organs	LY6E	8	143018261	chr8:143018261:G:A	G	A	A	1478	10682	ADD	6080	0.686471	0.153191	0.508424	0.926871	-2.45569	0.0140615
585.3	Chronic renal failure [CKD]	genitourinary	ACE2	NA	15674766	chrX:15674766:C:G	C	G	G	2154	9094	ADD	5624	0.911241	0.0378687	0.846057	0.981448	-2.45446	0.0141095
587	Kidney replaced by transpant	genitourinary	ACE2	NA	15675244	chrX:15675244:A:G	G	A	A	290	9094	ADD	4692	1.26719	0.0965416	1.04873	1.53115	2.45284	0.0141734
587	Kidney replaced by transpant	genitourinary	ACE2	NA	15675338	chrX:15675338:T:A	A	T	T	290	9094	ADD	4692	1.26719	0.0965416	1.04873	1.53115	2.45284	0.0141734
174.1	Breast cancer [female]	neoplasms	TMPRSS2	21	41508701	chr21:41508701:T:G	G	T	T	258	12630	ADD	6444	1.58099	0.186984	1.09589	2.28082	2.44969	0.0142979
701.2	Scar conditions and fibrosis of skin	dermatologic	ACE2	NA	15674699	chrX:15674699:T:C	C	T	T	220	13082	ADD	6651	0.772698	0.105444	0.628429	0.950088	-2.44554	0.0144636
211	Benign neoplasm of other parts of digestive system	neoplasms	DPP4	2	162073469	chr2:162073469:A:G	A	G	G	90	13052	ADD	6571	1.63487	0.201188	1.10213	2.42513	2.44331	0.0145531
701.2	Scar conditions and fibrosis of skin	dermatologic	ACE2	NA	15674316	chrX:15674316:A:C	C	A	A	220	13082	ADD	6651	0.772997	0.105448	0.628667	0.950463	-2.44177	0.0146154
332	Parkinson's disease	neurological	LY6E	8	143018292	chr8:143018292:C:A	C	A	A	108	12132	ADD	6120	10.1932	0.95092	1.58083	65.7255	2.44155	0.0146244
250.14	Type 1 diabetes with neurological manifestations	endocrine/metabolic	TMPRSS2	21	41508701	chr21:41508701:T:G	G	T	T	56	8660	ADD	4358	2.13712	0.311078	1.16155	3.93205	2.44138	0.0146314
530.13	Barrett's esophagus	digestive	DPP4	2	162073222	chr2:162073222:G:A	G	A	A	208	8740	ADD	4474	1.41364	0.141809	1.07061	1.86659	2.44111	0.0146423
565.1	Anal and rectal polyp	digestive	DPP4	2	162073222	chr2:162073222:G:A	G	A	A	14	12790	ADD	6402	2.83784	0.427409	1.22794	6.55841	2.44038	0.0146717
587	Kidney replaced by transpant	genitourinary	ACE2	NA	15674316	chrX:15674316:A:C	C	A	A	290	9094	ADD	4692	1.2657	0.0965535	1.04747	1.52938	2.44033	0.0146739
972	Poisoning by agents primarily affecting the cardiovascular system	injuries & poisonings	TMPRSS2	21	41508700	chr21:41508700:G:A	G	A	A	64	10396	ADD	5230	2.23277	0.329521	1.17045	4.25924	2.4376	0.014785
728.7	Fasciitis	musculoskeletal	ACE2	NA	15674699	chrX:15674699:T:C	C	T	T	86	11742	ADD	5914	0.640822	0.182577	0.44805	0.916531	-2.43735	0.0147955
701.2	Scar conditions and fibrosis of skin	dermatologic	ACE2	NA	15675244	chrX:15675244:A:G	G	A	A	220	13082	ADD	6651	0.773393	0.105431	0.629009	0.950919	-2.4373	0.0147975
701.2	Scar conditions and fibrosis of skin	dermatologic	ACE2	NA	15675338	chrX:15675338:T:A	A	T	T	220	13082	ADD	6651	0.773393	0.105431	0.629009	0.950919	-2.4373	0.0147975
587	Kidney replaced by transpant	genitourinary	ACE2	NA	15674699	chrX:15674699:T:C	C	T	T	290	9094	ADD	4692	1.26518	0.0965507	1.04706	1.52875	2.43621	0.0148422
597.2	Urinary complications NEC	genitourinary	LY6E	8	143018292	chr8:143018292:C:A	C	A	A	12	13028	ADD	6520	38.3804	1.49762	2.03859	722.584	2.43556	0.0148689
593.2	Microscopic hematuria	genitourinary	LY6E	8	143018292	chr8:143018292:C:A	C	A	A	158	11260	ADD	5709	10.5742	0.968502	1.58437	70.5728	2.43512	0.014887
565.1	Anal and rectal polyp	digestive	DPP4	2	162073199	chr2:162073199:T:G	T	G	G	14	12790	ADD	6402	2.83102	0.427548	1.22466	6.54445	2.43397	0.0149343
728.7	Fasciitis	musculoskeletal	ACE2	NA	15675244	chrX:15675244:A:G	G	A	A	86	11742	ADD	5914	0.641214	0.182614	0.448293	0.917158	-2.43351	0.0149533
728.7	Fasciitis	musculoskeletal	ACE2	NA	15675338	chrX:15675338:T:A	A	T	T	86	11742	ADD	5914	0.641214	0.182614	0.448293	0.917158	-2.43351	0.0149533
270.31	Polyclonal hypergammaglobulinemia	endocrine/metabolic	LY6E	8	143018292	chr8:143018292:C:A	C	A	A	2	13108	ADD	6555	39.896	1.51789	2.03657	781.552	2.42855	0.0151591
561	Symptoms involving digestive system	digestive	DPP4	2	162073222	chr2:162073222:G:A	G	A	A	288	10794	ADD	5541	1.34305	0.121589	1.05827	1.70447	2.42572	0.0152781
363.3	Chorioretinal scars	sense organs	LY6E	8	143018292	chr8:143018292:C:A	C	A	A	4	12608	ADD	6306	39.0129	1.511	2.01858	753.999	2.42482	0.015316
800.3	Fracture of tibia and fibula	injuries & poisonings	TMPRSS2	21	41508701	chr21:41508701:T:G	G	T	T	40	12878	ADD	6459	2.3138	0.34607	1.17422	4.55933	2.42406	0.0153483
728.7	Fasciitis	musculoskeletal	ACE2	NA	15674316	chrX:15674316:A:C	C	A	A	86	11742	ADD	5914	0.642842	0.18232	0.449689	0.918958	-2.42352	0.015371
530.13	Barrett's esophagus	digestive	DPP4	2	162073199	chr2:162073199:T:G	T	G	G	208	8740	ADD	4474	1.41033	0.141885	1.06794	1.86249	2.42326	0.0153818
694.1	Vitiligo	dermatologic	LY6E	8	143018292	chr8:143018292:C:A	C	A	A	8	12078	ADD	6043	39.4465	1.51847	2.01134	773.627	2.42017	0.0155134
149.3	Cancer of hypopharynx	neoplasms	LY6E	8	143018292	chr8:143018292:C:A	C	A	A	6	13704	ADD	6855	45.1351	1.5832	2.02718	1004.93	2.4063	0.0161149
561	Symptoms involving digestive system	digestive	DPP4	2	162073199	chr2:162073199:T:G	T	G	G	288	10794	ADD	5541	1.33951	0.121667	1.05531	1.70023	2.40247	0.0162849
635	Hemorrhage during pregnancy; childbirth and postpartum	pregnancy complications	LY6E	8	143018292	chr8:143018292:C:A	C	A	A	6	13800	ADD	6903	48.3648	1.61841	2.02739	1153.78	2.39666	0.0165454
599.9	Other abnormality of urination	genitourinary	ACE2	NA	15675244	chrX:15675244:A:G	G	A	A	248	11058	ADD	5653	1.2765	0.101909	1.04538	1.55871	2.39548	0.0165987
599.9	Other abnormality of urination	genitourinary	ACE2	NA	15675338	chrX:15675338:T:A	A	T	T	248	11058	ADD	5653	1.2765	0.101909	1.04538	1.55871	2.39548	0.0165987
695.81	Erythema nodosum	dermatologic	LY6E	8	143018292	chr8:143018292:C:A	C	A	A	2	12078	ADD	6040	41.0344	1.55193	1.95949	859.318	2.39341	0.0166924
289.9	Abnormality of red blood cells	hematopoietic	LY6E	8	143018292	chr8:143018292:C:A	C	A	A	6	11700	ADD	5853	36.6045	1.50449	1.91827	698.486	2.39295	0.0167134
599.9	Other abnormality of urination	genitourinary	ACE2	NA	15674316	chrX:15674316:A:C	C	A	A	248	11058	ADD	5653	1.27621	0.101932	1.0451	1.55843	2.39273	0.0167235
599.9	Other abnormality of urination	genitourinary	ACE2	NA	15674699	chrX:15674699:T:C	C	T	T	248	11058	ADD	5653	1.27555	0.101913	1.0446	1.55757	2.38811	0.0169351
701.2	Scar conditions and fibrosis of skin	dermatologic	ACE2	NA	15674766	chrX:15674766:C:G	C	G	G	220	13082	ADD	6651	1.28546	0.105239	1.04587	1.57993	2.38616	0.0170253
618	Genital prolapse	genitourinary	LY6E	8	143017718	chr8:143017718:G:C	C	G	G	104	13692	ADD	6898	2.67843	0.412945	1.19229	6.017	2.38586	0.017039
840.3	Joint/ligament sprain	injuries & poisonings	TMPRSS2	21	41508700	chr21:41508700:G:A	G	A	A	80	12892	ADD	6486	1.73608	0.231638	1.10255	2.73364	2.38143	0.0172455
701.2	Scar conditions and fibrosis of skin	dermatologic	ACE2	NA	15675734	chrX:15675734:C:T	C	T	T	220	13082	ADD	6651	1.28474	0.105222	1.04533	1.579	2.38124	0.0172543
401.22	Hypertensive chronic kidney disease	circulatory system	DPP4	2	162073469	chr2:162073469:A:G	A	G	G	1392	3936	ADD	2664	0.846224	0.0701656	0.737497	0.970981	-2.37966	0.0173284
278.4	Abnormal weight gain	endocrine/metabolic	DPP4	2	162073222	chr2:162073222:G:A	G	A	A	144	10098	ADD	5121	1.48473	0.166205	1.07195	2.05647	2.37799	0.0174075
695.81	Erythema nodosum	dermatologic	LY6E	8	143017718	chr8:143017718:G:C	C	G	G	2	12078	ADD	6040	5.448	0.714849	1.34201	22.1165	2.37148	0.0177171
721	Spondylosis and allied disorders	musculoskeletal	DPP4	2	162073469	chr2:162073469:A:G	A	G	G	242	11830	ADD	6036	0.712203	0.143473	0.537625	0.943469	-2.36556	0.0180031
585	Renal failure	genitourinary	ACE2	NA	15675244	chrX:15675244:A:G	G	A	A	2532	9094	ADD	5813	1.08814	0.0357214	1.01456	1.16705	2.36456	0.0180516
585	Renal failure	genitourinary	ACE2	NA	15675338	chrX:15675338:T:A	A	T	T	2532	9094	ADD	5813	1.08814	0.0357214	1.01456	1.16705	2.36456	0.0180516
781	Symptoms involving nervous and musculoskeletal systems	symptoms	ACE2	NA	15675734	chrX:15675734:C:T	C	T	T	116	13450	ADD	6783	1.43	0.151607	1.0624	1.9248	2.35923	0.0183127
278.4	Abnormal weight gain	endocrine/metabolic	DPP4	2	162073199	chr2:162073199:T:G	T	G	G	144	10098	ADD	5121	1.47991	0.166296	1.06828	2.05016	2.35715	0.018416
585.34	Chronic Kidney Disease, Stage IV	genitourinary	DPP4	2	162074215	chr2:162074215:T:G	G	T	T	348	9094	ADD	4721	0.757365	0.117932	0.601065	0.954309	-2.35653	0.0184468
465	Acute upper respiratory infections of multiple or unspecified sites	respiratory	DPP4	2	162073469	chr2:162073469:A:G	A	G	G	578	12026	ADD	6302	1.22754	0.0871444	1.03481	1.45618	2.3526	0.0186429
512.7	Shortness of breath	respiratory	LY6E	8	143018261	chr8:143018261:G:A	G	A	A	3016	6864	ADD	4940	0.772315	0.109836	0.622732	0.957827	-2.35226	0.01866
735.1	Flat foot	musculoskeletal	LY6E	8	143018292	chr8:143018292:C:A	C	A	A	18	13062	ADD	6540	36.0611	1.52624	1.81093	718.089	2.34905	0.0188214
840.3	Joint/ligament sprain	injuries & poisonings	TMPRSS2	21	41508701	chr21:41508701:T:G	G	T	T	80	12892	ADD	6486	1.65212	0.213999	1.08614	2.51303	2.34607	0.0189727
253.11	Acromegaly and gigantism	endocrine/metabolic	LY6E	8	143018292	chr8:143018292:C:A	C	A	A	4	12702	ADD	6353	35.2999	1.52001	1.79447	694.399	2.34464	0.0190455
565.1	Anal and rectal polyp	digestive	LY6E	8	143018292	chr8:143018292:C:A	C	A	A	14	12790	ADD	6402	35.1964	1.51945	1.79119	691.598	2.34358	0.0190997
211	Benign neoplasm of other parts of digestive system	neoplasms	DPP4	2	162073222	chr2:162073222:G:A	G	A	A	90	13052	ADD	6571	1.60772	0.202739	1.08053	2.39211	2.34199	0.019181
556.1	Ulceration of intestine	digestive	LY6E	8	143018292	chr8:143018292:C:A	C	A	A	22	10794	ADD	5408	33.9657	1.50635	1.77351	650.499	2.34033	0.0192668
261.4	Vitamin D deficiency	endocrine/metabolic	ACE2	NA	15675244	chrX:15675244:A:G	G	A	A	684	11208	ADD	5946	0.853222	0.0679861	0.746779	0.974836	-2.33483	0.0195523
261.4	Vitamin D deficiency	endocrine/metabolic	ACE2	NA	15675338	chrX:15675338:T:A	A	T	T	684	11208	ADD	5946	0.853222	0.0679861	0.746779	0.974836	-2.33483	0.0195523
211	Benign neoplasm of other parts of digestive system	neoplasms	DPP4	2	162073199	chr2:162073199:T:G	T	G	G	90	13052	ADD	6571	1.60522	0.202961	1.07838	2.38943	2.33177	0.019713
736.4	Genu valgum or varum (acquired)	musculoskeletal	LY6E	8	143018292	chr8:143018292:C:A	C	A	A	4	13062	ADD	6533	39.9991	1.58201	1.8007	888.505	2.33175	0.0197137
274.2	Crystal arthropathies	endocrine/metabolic	LY6E	8	143018292	chr8:143018292:C:A	C	A	A	10	12538	ADD	6274	33.8278	1.51015	1.7532	652.705	2.33174	0.0197141
442	Other aneurysm	circulatory system	TMPRSS2	21	41508701	chr21:41508701:T:G	G	T	T	1120	9702	ADD	5411	1.24483	0.0939361	1.03551	1.49647	2.33138	0.0197333
425.1	Primary/intrinsic cardiomyopathies	circulatory system	TMPRSS2	21	41508701	chr21:41508701:T:G	G	T	T	2016	9734	ADD	5875	1.19169	0.0752241	1.02833	1.381	2.33135	0.0197349
599.9	Other abnormality of urination	genitourinary	ACE2	NA	15675734	chrX:15675734:C:T	C	T	T	248	11058	ADD	5653	0.788596	0.101888	0.645844	0.962902	-2.33099	0.0197537
585	Renal failure	genitourinary	ACE2	NA	15674316	chrX:15674316:A:C	C	A	A	2532	9094	ADD	5813	1.08682	0.0357276	1.01332	1.16565	2.33032	0.0197894
117.1	Histoplasmosis	infectious diseases	LY6E	8	143018292	chr8:143018292:C:A	C	A	A	2	12460	ADD	6231	40.7014	1.59236	1.79553	922.63	2.32753	0.019937
599.9	Other abnormality of urination	genitourinary	ACE2	NA	15674766	chrX:15674766:C:G	C	G	G	248	11058	ADD	5653	0.789012	0.101892	0.64618	0.963417	-2.32574	0.0200325
702.1	Actinic keratosis	dermatologic	LY6E	8	143018261	chr8:143018261:G:A	G	A	A	684	12414	ADD	6549	1.45417	0.161072	1.0605	1.99398	2.32466	0.0200904
375.1	Dry eyes	sense organs	TMPRSS2	21	41508701	chr21:41508701:T:G	G	T	T	176	12886	ADD	6531	1.64112	0.213098	1.08081	2.49189	2.32463	0.0200915
250.4	Abnormal glucose	endocrine/metabolic	LY6E	8	143018261	chr8:143018261:G:A	G	A	A	654	8660	ADD	4657	0.565341	0.245468	0.349436	0.914647	-2.32342	0.0201564
781	Symptoms involving nervous and musculoskeletal systems	symptoms	ACE2	NA	15675244	chrX:15675244:A:G	G	A	A	116	13450	ADD	6783	0.703237	0.151603	0.522465	0.946556	-2.32226	0.0202189
781	Symptoms involving nervous and musculoskeletal systems	symptoms	ACE2	NA	15675338	chrX:15675338:T:A	A	T	T	116	13450	ADD	6783	0.703237	0.151603	0.522465	0.946556	-2.32226	0.0202189
401.22	Hypertensive chronic kidney disease	circulatory system	DPP4	2	162073199	chr2:162073199:T:G	T	G	G	1392	3936	ADD	2664	0.84717	0.071478	0.736425	0.97457	-2.32034	0.0203224
345.11	Generalized convulsive epilepsy	neurological	LY6E	8	143018292	chr8:143018292:C:A	C	A	A	4	12132	ADD	6068	46.58	1.65626	1.81295	1196.78	2.31918	0.0203854
557.1	Celiac disease	digestive	DPP4	2	162073222	chr2:162073222:G:A	G	A	A	26	10794	ADD	5410	1.94809	0.287648	1.10857	3.42338	2.31829	0.0204338
736.5	Acquired deformities of knee	musculoskeletal	LY6E	8	143018292	chr8:143018292:C:A	C	A	A	2	13062	ADD	6532	37.4586	1.56415	1.7464	803.452	2.31642	0.0205353
585	Renal failure	genitourinary	ACE2	NA	15674699	chrX:15674699:T:C	C	T	T	2532	9094	ADD	5813	1.08618	0.0357249	1.01273	1.16496	2.31405	0.020665
619.4	Noninflammatory disorders of vagina	genitourinary	LY6E	8	143018261	chr8:143018261:G:A	G	A	A	46	13546	ADD	6796	2.73428	0.434812	1.16609	6.41145	2.31335	0.0207037
504.1	Idiopathic fibrosing alveolitis	respiratory	LY6E	8	143017718	chr8:143017718:G:C	C	G	G	254	10258	ADD	5256	1.96898	0.29288	1.10903	3.49576	2.3133	0.0207063
557.1	Celiac disease	digestive	DPP4	2	162073199	chr2:162073199:T:G	T	G	G	26	10794	ADD	5410	1.94501	0.287663	1.10678	3.41806	2.31266	0.0207416
364.41	Keratoconus	sense organs	LY6E	8	143018292	chr8:143018292:C:A	C	A	A	8	12608	ADD	6308	29.2108	1.46322	1.65976	514.092	2.30624	0.0210974
070.4	Chronic hepatitis	infectious diseases	LY6E	8	143018261	chr8:143018261:G:A	G	A	A	22	11882	ADD	5952	3.28098	0.515409	1.19478	9.00991	2.30524	0.021153
401.22	Hypertensive chronic kidney disease	circulatory system	ACE2	NA	15675734	chrX:15675734:C:T	C	T	T	1392	3936	ADD	2664	0.887091	0.0520335	0.801082	0.982334	-2.30252	0.021306
272.9	Unspecified disorder of lipoid metabolism	endocrine/metabolic	DPP4	2	162074215	chr2:162074215:T:G	G	T	T	54	4236	ADD	2145	1.76719	0.24747	1.08802	2.87031	2.30084	0.0214008
428.4	Heart failure with preserved EF [Diastolic heart failure]	circulatory system	LY6E	8	143017718	chr8:143017718:G:C	C	G	G	960	6532	ADD	3746	1.62379	0.210856	1.07411	2.45477	2.29902	0.0215036
250.11	Type 1 diabetes with ketoacidosis	endocrine/metabolic	LY6E	8	143018292	chr8:143018292:C:A	C	A	A	10	8660	ADD	4335	42.0067	1.6285	1.72638	1022.12	2.29526	0.0217183
261.4	Vitamin D deficiency	endocrine/metabolic	ACE2	NA	15674699	chrX:15674699:T:C	C	T	T	684	11208	ADD	5946	0.855647	0.067987	0.748901	0.97761	-2.29304	0.0218457
227.1	Benign neoplasm of adrenal gland	neoplasms	LY6E	8	143017718	chr8:143017718:G:C	C	G	G	42	13558	ADD	6800	3.30545	0.521525	1.18934	9.18657	2.29245	0.0218796
401.22	Hypertensive chronic kidney disease	circulatory system	DPP4	2	162073222	chr2:162073222:G:A	G	A	A	1392	3936	ADD	2664	0.849221	0.0714431	0.738258	0.976861	-2.28764	0.0221582
979	Adverse drug events and drug allergies	injuries & poisonings	LY6E	8	143018261	chr8:143018261:G:A	G	A	A	214	10396	ADD	5305	0.196776	0.710833	0.048855	0.792563	-2.28702	0.0221945
528	Diseases of the oral soft tissues, excluding lesions specific for gingiva and tongue	digestive	ACE2	NA	15674766	chrX:15674766:C:G	C	G	G	80	13238	ADD	6659	1.49711	0.176493	1.05931	2.11584	2.2864	0.0222306
301.2	Antisocial/borderline personality disorder	mental disorders	LY6E	8	143018292	chr8:143018292:C:A	C	A	A	8	8620	ADD	4314	42.559	1.64112	1.70633	1061.49	2.28556	0.0222799
364.9	Cornea replaced by transplant	sense organs	LY6E	8	143018292	chr8:143018292:C:A	C	A	A	10	12608	ADD	6309	28.3302	1.4634	1.60917	498.766	2.28504	0.0223103
586.12	Vesicoureteral reflux	genitourinary	LY6E	8	143018292	chr8:143018292:C:A	C	A	A	4	9094	ADD	4549	57.661	1.77544	1.77673	1871.29	2.2837	0.0223891
752.2	Other specified congenital anomalies of nervous system	congenital anomalies	LY6E	8	143018292	chr8:143018292:C:A	C	A	A	4	13786	ADD	6895	30.4628	1.49738	1.61881	573.252	2.28165	0.0225099
261.4	Vitamin D deficiency	endocrine/metabolic	ACE2	NA	15674316	chrX:15674316:A:C	C	A	A	684	11208	ADD	5946	0.856398	0.0679875	0.749556	0.978468	-2.28014	0.0225997
197	Chemotherapy	neoplasms	ACE2	NA	15674766	chrX:15674766:C:G	C	G	G	248	12414	ADD	6331	1.26212	0.10213	1.03316	1.54182	2.27941	0.0226428
528	Diseases of the oral soft tissues, excluding lesions specific for gingiva and tongue	digestive	ACE2	NA	15675734	chrX:15675734:C:T	C	T	T	80	13238	ADD	6659	1.49508	0.176459	1.05794	2.11284	2.27917	0.022657
197	Chemotherapy	neoplasms	ACE2	NA	15675734	chrX:15675734:C:T	C	T	T	248	12414	ADD	6331	1.26145	0.102117	1.03264	1.54096	2.27447	0.022938
172.22	Squamous cell carcinoma	neoplasms	LY6E	8	143017718	chr8:143017718:G:C	C	G	G	288	11784	ADD	6036	1.79516	0.257361	1.08402	2.97283	2.27345	0.0229994
401.22	Hypertensive chronic kidney disease	circulatory system	ACE2	NA	15674766	chrX:15674766:C:G	C	G	G	1392	3936	ADD	2664	0.888467	0.0520394	0.802316	0.983869	-2.27246	0.0230588
217.1	Nevus, non-neoplastic	neoplasms	ACE2	NA	15674766	chrX:15674766:C:G	C	G	G	148	10588	ADD	5368	1.35383	0.133454	1.04224	1.75857	2.26997	0.0232097
217.1	Nevus, non-neoplastic	neoplasms	ACE2	NA	15675734	chrX:15675734:C:T	C	T	T	148	10588	ADD	5368	1.35366	0.13348	1.04206	1.75845	2.26862	0.0232917
585.3	Chronic renal failure [CKD]	genitourinary	ACE2	NA	15675244	chrX:15675244:A:G	G	A	A	2154	9094	ADD	5624	1.08954	0.0378461	1.01165	1.17344	2.26598	0.0234527
585.3	Chronic renal failure [CKD]	genitourinary	ACE2	NA	15675338	chrX:15675338:T:A	A	T	T	2154	9094	ADD	5624	1.08954	0.0378461	1.01165	1.17344	2.26598	0.0234527
561	Symptoms involving digestive system	digestive	DPP4	2	162073469	chr2:162073469:A:G	A	G	G	288	10794	ADD	5541	1.31593	0.12126	1.03757	1.66897	2.26409	0.0235685
913	Toxic effect of venom	injuries & poisonings	LY6E	8	143018292	chr8:143018292:C:A	C	A	A	8	13772	ADD	6890	28.7469	1.48444	1.56689	527.407	2.2625	0.0236667
597.2	Urinary complications NEC	genitourinary	TMPRSS2	21	41508700	chr21:41508700:G:A	G	A	A	12	13028	ADD	6520	2.93884	0.477005	1.15385	7.4852	2.25996	0.0238236
565.1	Anal and rectal polyp	digestive	DPP4	2	162073469	chr2:162073469:A:G	A	G	G	14	12790	ADD	6402	2.57674	0.418947	1.13361	5.85705	2.2593	0.0238647
250.7	Diabetic retinopathy	endocrine/metabolic	TMPRSS2	21	41508701	chr21:41508701:T:G	G	T	T	156	12398	ADD	6277	1.60228	0.208721	1.06433	2.41214	2.25865	0.0239049
346.1	Nonspecific abnormal findings on radiological and other examination of skull and head	neurological	LY6E	8	143018292	chr8:143018292:C:A	C	A	A	16	12132	ADD	6074	31.8339	1.53245	1.57932	641.669	2.25817	0.0239348
714.2	Juvenile rheumatoid arthritis	musculoskeletal	LY6E	8	143018292	chr8:143018292:C:A	C	A	A	2	12410	ADD	6206	39.3907	1.62707	1.62341	955.781	2.25776	0.0239609
599.3	Dysuria	genitourinary	LY6E	8	143018292	chr8:143018292:C:A	C	A	A	166	11058	ADD	5612	8.4773	0.947467	1.32365	54.2929	2.2559	0.0240768
528	Diseases of the oral soft tissues, excluding lesions specific for gingiva and tongue	digestive	ACE2	NA	15674699	chrX:15674699:T:C	C	T	T	80	13238	ADD	6659	0.671545	0.176612	0.475053	0.94931	-2.25451	0.0241642
426.31	Right bundle branch block	circulatory system	LY6E	8	143018261	chr8:143018261:G:A	G	A	A	360	3868	ADD	2114	1.64872	0.22182	1.06742	2.5466	2.25409	0.0241908
977	Personal history of allergy to medicinal agents	injuries & poisonings	DPP4	2	162073469	chr2:162073469:A:G	A	G	G	158	10396	ADD	5277	0.672596	0.176045	0.476326	0.949739	-2.25289	0.0242662
528	Diseases of the oral soft tissues, excluding lesions specific for gingiva and tongue	digestive	ACE2	NA	15674316	chrX:15674316:A:C	C	A	A	80	13238	ADD	6659	0.671842	0.176587	0.475287	0.949683	-2.25233	0.0243017
740.1	Osteoarthritis; localized	musculoskeletal	TMPRSS2	21	41508701	chr21:41508701:T:G	G	T	T	400	11290	ADD	5845	0.64981	0.191391	0.446554	0.945581	-2.25232	0.0243018
977	Personal history of allergy to medicinal agents	injuries & poisonings	DPP4	2	162073199	chr2:162073199:T:G	T	G	G	158	10396	ADD	5277	0.66777	0.179563	0.469659	0.949447	-2.24886	0.0245212
306.1	Mental disorders durring/after pregnancy	mental disorders	LY6E	8	143018292	chr8:143018292:C:A	C	A	A	10	8620	ADD	4315	40.0384	1.64139	1.60445	999.143	2.248	0.0245761
528	Diseases of the oral soft tissues, excluding lesions specific for gingiva and tongue	digestive	ACE2	NA	15675244	chrX:15675244:A:G	G	A	A	80	13238	ADD	6659	0.672431	0.17657	0.47572	0.950483	-2.24758	0.0246027
528	Diseases of the oral soft tissues, excluding lesions specific for gingiva and tongue	digestive	ACE2	NA	15675338	chrX:15675338:T:A	A	T	T	80	13238	ADD	6659	0.672431	0.17657	0.47572	0.950483	-2.24758	0.0246027
313	Pervasive developmental disorders	mental disorders	DPP4	2	162073222	chr2:162073222:G:A	G	A	A	88	13628	ADD	6858	1.52902	0.189221	1.05523	2.21553	2.24408	0.0248273
803.21	Colles' fracture	injuries & poisonings	LY6E	8	143018292	chr8:143018292:C:A	C	A	A	22	12878	ADD	6450	36.7225	1.60699	1.57419	856.656	2.24232	0.0249409
528	Diseases of the oral soft tissues, excluding lesions specific for gingiva and tongue	digestive	LY6E	8	143017718	chr8:143017718:G:C	C	G	G	80	13238	ADD	6659	2.61529	0.428923	1.12829	6.06205	2.24137	0.0250022
592.2	Urethritis and urethral syndrome	genitourinary	LY6E	8	143018292	chr8:143018292:C:A	C	A	A	4	11260	ADD	5632	50.7058	1.75207	1.63568	1571.88	2.24081	0.0250385
250.1	Type 1 diabetes	endocrine/metabolic	TMPRSS2	21	41508701	chr21:41508701:T:G	G	T	T	242	8660	ADD	4451	1.50234	0.181832	1.05195	2.14558	2.23847	0.0251902
759.1	Anomalies of endocrine glands, congenital	congenital anomalies	LY6E	8	143018292	chr8:143018292:C:A	C	A	A	16	13584	ADD	6800	27.5063	1.48177	1.50713	502.013	2.2368	0.0252994
585.3	Chronic renal failure [CKD]	genitourinary	ACE2	NA	15674316	chrX:15674316:A:C	C	A	A	2154	9094	ADD	5624	1.08821	0.0378524	1.0104	1.17201	2.23325	0.0255325
741.4	Joint effusions	musculoskeletal	TMPRSS2	21	41508700	chr21:41508700:G:A	G	A	A	84	13062	ADD	6573	1.97131	0.304058	1.08627	3.57741	2.23213	0.0256065
117.2	Coccidioidomycosis	infectious diseases	LY6E	8	143017718	chr8:143017718:G:C	C	G	G	2	12460	ADD	6231	5.0856	0.729099	1.21824	21.2301	2.23072	0.0256999
370.2	Superficial keratitis	sense organs	LY6E	8	143018292	chr8:143018292:C:A	C	A	A	2	12910	ADD	6456	36.7868	1.61738	1.54518	875.799	2.229	0.0258136
217.1	Nevus, non-neoplastic	neoplasms	ACE2	NA	15674699	chrX:15674699:T:C	C	T	T	148	10588	ADD	5368	0.742698	0.133473	0.571742	0.964772	-2.22866	0.0258364
977	Personal history of allergy to medicinal agents	injuries & poisonings	DPP4	2	162073222	chr2:162073222:G:A	G	A	A	158	10396	ADD	5277	0.670388	0.179443	0.471612	0.952946	-2.22856	0.0258434
425.1	Primary/intrinsic cardiomyopathies	circulatory system	TMPRSS2	21	41508700	chr21:41508700:G:A	G	A	A	2016	9734	ADD	5875	1.20863	0.0850784	1.023	1.42795	2.22721	0.0259332
676	Other disorders of the breast associated with childbirth and disorders of lactation	pregnancy complications	LY6E	8	143018292	chr8:143018292:C:A	C	A	A	2	13832	ADD	6917	27.4272	1.48697	1.48756	505.696	2.22704	0.0259445
446.4	Wegener's granulomatosis	circulatory system	LY6E	8	143018292	chr8:143018292:C:A	C	A	A	4	9702	ADD	4853	32.4417	1.5628	1.51652	694	2.22642	0.025986
313	Pervasive developmental disorders	mental disorders	DPP4	2	162073199	chr2:162073199:T:G	T	G	G	88	13628	ADD	6858	1.52389	0.189252	1.05163	2.20823	2.22595	0.0260178
573.2	Liver replaced by transplant	digestive	DPP4	2	162073469	chr2:162073469:A:G	A	G	G	134	11600	ADD	5867	0.655261	0.19003	0.451503	0.950972	-2.22451	0.0261145
217.1	Nevus, non-neoplastic	neoplasms	ACE2	NA	15675244	chrX:15675244:A:G	G	A	A	148	10588	ADD	5368	0.74319	0.133476	0.572116	0.965417	-2.22364	0.0261724
217.1	Nevus, non-neoplastic	neoplasms	ACE2	NA	15675338	chrX:15675338:T:A	A	T	T	148	10588	ADD	5368	0.74319	0.133476	0.572116	0.965417	-2.22364	0.0261724
117.2	Coccidioidomycosis	infectious diseases	LY6E	8	143018292	chr8:143018292:C:A	C	A	A	2	12460	ADD	6231	34.1445	1.58805	1.51904	767.491	2.22323	0.0262003
781	Symptoms involving nervous and musculoskeletal systems	symptoms	ACE2	NA	15674766	chrX:15674766:C:G	C	G	G	116	13450	ADD	6783	1.39851	0.150917	1.04041	1.87986	2.22244	0.0262536
217.1	Nevus, non-neoplastic	neoplasms	ACE2	NA	15674316	chrX:15674316:A:C	C	A	A	148	10588	ADD	5368	0.743739	0.133408	0.572616	0.966001	-2.21925	0.02647
585.3	Chronic renal failure [CKD]	genitourinary	ACE2	NA	15674699	chrX:15674699:T:C	C	T	T	2154	9094	ADD	5624	1.08761	0.0378495	1.00985	1.17136	2.21893	0.0264918
753	Congenital anomalies of the eye	congenital anomalies	LY6E	8	143018292	chr8:143018292:C:A	C	A	A	8	13786	ADD	6897	29.9282	1.53695	1.47172	608.604	2.21139	0.0270086
985	Toxic effect of other metals	injuries & poisonings	LY6E	8	143018292	chr8:143018292:C:A	C	A	A	2	13766	ADD	6884	35.0854	1.60918	1.49758	821.98	2.21093	0.0270405
255.11	Cushing's syndrome	endocrine/metabolic	LY6E	8	143018292	chr8:143018292:C:A	C	A	A	12	12702	ADD	6357	28.6241	1.51727	1.46294	560.064	2.21071	0.027056
694	Dyschromia and Vitiligo	dermatologic	LY6E	8	143018261	chr8:143018261:G:A	G	A	A	132	12078	ADD	6105	1.95856	0.304286	1.07877	3.55587	2.20913	0.0271654
578.1	Hematemesis	digestive	LY6E	8	143018292	chr8:143018292:C:A	C	A	A	10	12412	ADD	6211	26.8209	1.48914	1.44848	496.631	2.20877	0.0271904
197	Chemotherapy	neoplasms	ACE2	NA	15674699	chrX:15674699:T:C	C	T	T	248	12414	ADD	6331	0.798156	0.102125	0.653369	0.975027	-2.2076	0.027272
575.6	Cholesterolosis of gallbladder	digestive	LY6E	8	143018292	chr8:143018292:C:A	C	A	A	8	13176	ADD	6592	30.6419	1.55166	1.46401	641.341	2.20562	0.0274105
751	Genitourinary congenital anomalies	congenital anomalies	LY6E	8	143018261	chr8:143018261:G:A	G	A	A	162	13448	ADD	6805	1.85314	0.279998	1.07046	3.20806	2.20315	0.0275838
197	Chemotherapy	neoplasms	ACE2	NA	15674316	chrX:15674316:A:C	C	A	A	248	12414	ADD	6331	0.79856	0.102126	0.653698	0.975523	-2.20262	0.0276215
427.41	Ventricular fibrillation and flutter	circulatory system	DPP4	2	162074215	chr2:162074215:T:G	G	T	T	120	3868	ADD	1994	1.52137	0.190793	1.04673	2.21125	2.19932	0.0278554
800.3	Fracture of tibia and fibula	injuries & poisonings	TMPRSS2	21	41508700	chr21:41508700:G:A	G	A	A	40	12878	ADD	6459	2.3034	0.379385	1.09506	4.8451	2.19931	0.0278557
197	Chemotherapy	neoplasms	ACE2	NA	15675244	chrX:15675244:A:G	G	A	A	248	12414	ADD	6331	0.798924	0.102111	0.654016	0.975939	-2.19848	0.0279151
197	Chemotherapy	neoplasms	ACE2	NA	15675338	chrX:15675338:T:A	A	T	T	248	12414	ADD	6331	0.798924	0.102111	0.654016	0.975939	-2.19848	0.0279151
798	Malaise and fatigue	symptoms	TMPRSS2	21	41508701	chr21:41508701:T:G	G	T	T	2900	8940	ADD	5920	1.15635	0.0661227	1.01579	1.31636	2.19697	0.0280229
624.9	stress incontinence, female	genitourinary	LY6E	8	143018292	chr8:143018292:C:A	C	A	A	98	13430	ADD	6764	8.01987	0.948175	1.25049	51.4346	2.19571	0.0281124
368.9	Subjective visual disturbances	sense organs	LY6E	8	143018292	chr8:143018292:C:A	C	A	A	26	12998	ADD	6512	26.7528	1.49815	1.41952	504.193	2.1938	0.0282498
475	Chronic sinusitis	respiratory	TMPRSS2	21	41508700	chr21:41508700:G:A	G	A	A	538	11070	ADD	5804	1.36741	0.142645	1.0339	1.8085	2.19366	0.0282595
938.2	Chronic dermatitis due to solar radiation	dermatologic	TMPRSS2	21	41508700	chr21:41508700:G:A	G	A	A	222	11688	ADD	5955	1.5622	0.20351	1.04835	2.32789	2.192	0.0283798
571	Chronic liver disease and cirrhosis	digestive	DPP4	2	162073469	chr2:162073469:A:G	A	G	G	454	11600	ADD	6027	0.79812	0.102892	0.652359	0.976449	-2.1916	0.0284087
279.7	Other immunological findings	endocrine/metabolic	LY6E	8	143018292	chr8:143018292:C:A	C	A	A	140	12876	ADD	6508	7.88265	0.942149	1.24369	49.961	2.19144	0.0284199
770	Myalgia and myositis unspecified	symptoms	LY6E	8	143018261	chr8:143018261:G:A	G	A	A	402	13080	ADD	6741	0.473843	0.341488	0.242638	0.925356	-2.18714	0.0287326
781	Symptoms involving nervous and musculoskeletal systems	symptoms	ACE2	NA	15674699	chrX:15674699:T:C	C	T	T	116	13450	ADD	6783	0.718951	0.150892	0.534884	0.96636	-2.18674	0.0287616
253.1	Pituitary hyperfunction	endocrine/metabolic	LY6E	8	143017718	chr8:143017718:G:C	C	G	G	8	12702	ADD	6355	3.4696	0.569221	1.13699	10.5877	2.18551	0.0288512
609	Male infertility and abnormal spermatozoa	genitourinary	LY6E	8	143018292	chr8:143018292:C:A	C	A	A	10	11416	ADD	5713	31.8982	1.58439	1.42932	711.87	2.18541	0.0288585
364.4	Corneal degenerations	sense organs	LY6E	8	143018292	chr8:143018292:C:A	C	A	A	16	12608	ADD	6312	23.9975	1.45432	1.38753	415.039	2.18517	0.0288761
721.1	Spondylosis without myelopathy	musculoskeletal	LY6E	8	143018261	chr8:143018261:G:A	G	A	A	418	11830	ADD	6124	0.494782	0.322187	0.263129	0.930378	-2.18395	0.0289662
285	Other anemias	hematopoietic	LY6E	8	143017718	chr8:143017718:G:C	C	G	G	2256	8640	ADD	5448	1.35689	0.139811	1.03167	1.78465	2.18294	0.0290402
594.8	Renal colic	genitourinary	LY6E	8	143018292	chr8:143018292:C:A	C	A	A	4	12962	ADD	6483	29.261	1.5467	1.41168	606.518	2.18288	0.0290448
781	Symptoms involving nervous and musculoskeletal systems	symptoms	ACE2	NA	15674316	chrX:15674316:A:C	C	A	A	116	13450	ADD	6783	0.719392	0.150906	0.535198	0.966979	-2.18248	0.0290744
371.1	Uveitis, noninfectious or NOS	sense organs	LY6E	8	143018292	chr8:143018292:C:A	C	A	A	30	12910	ADD	6470	22.6287	1.43112	1.36927	373.966	2.17957	0.0292897
698	Pruritus and related conditions	dermatologic	LY6E	8	143018292	chr8:143018292:C:A	C	A	A	148	13424	ADD	6786	8.36804	0.976524	1.23425	56.7339	2.17549	0.0295933
740.11	Osteoarthrosis, localized, primary	musculoskeletal	ACE2	NA	15675244	chrX:15675244:A:G	G	A	A	780	11290	ADD	6035	0.875963	0.0608836	0.777431	0.986984	-2.17515	0.0296187
740.11	Osteoarthrosis, localized, primary	musculoskeletal	ACE2	NA	15675338	chrX:15675338:T:A	A	T	T	780	11290	ADD	6035	0.875963	0.0608836	0.777431	0.986984	-2.17515	0.0296187
350.5	Abnormal reflex	neurological	LY6E	8	143018292	chr8:143018292:C:A	C	A	A	14	12670	ADD	6342	25.1433	1.48385	1.37205	460.76	2.17313	0.0297706
172.1	Melanomas of skin, dx or hx	neoplasms	LY6E	8	143017718	chr8:143017718:G:C	C	G	G	222	11784	ADD	6003	1.94895	0.307134	1.0675	3.55822	2.17263	0.029808
411.3	Angina pectoris	circulatory system	LY6E	8	143018261	chr8:143018261:G:A	G	A	A	754	6028	ADD	3391	1.44225	0.168606	1.03639	2.00705	2.17194	0.0298603
401.22	Hypertensive chronic kidney disease	circulatory system	ACE2	NA	15675244	chrX:15675244:A:G	G	A	A	1392	3936	ADD	2664	1.11963	0.0520276	1.01109	1.23983	2.1719	0.0298635
401.22	Hypertensive chronic kidney disease	circulatory system	ACE2	NA	15675338	chrX:15675338:T:A	A	T	T	1392	3936	ADD	2664	1.11963	0.0520276	1.01109	1.23983	2.1719	0.0298635
528.41	Cyst of the salivary gland	digestive	LY6E	8	143018292	chr8:143018292:C:A	C	A	A	2	13238	ADD	6620	29.7123	1.56261	1.38945	635.375	2.17045	0.0299729
713	Arthropathy associated with other disorders classified elsewhere	musculoskeletal	LY6E	8	143018292	chr8:143018292:C:A	C	A	A	16	12376	ADD	6196	33.5542	1.6193	1.40409	801.859	2.16956	0.0300406
258	Iatrogenic endocrine disorders	endocrine/metabolic	LY6E	8	143018292	chr8:143018292:C:A	C	A	A	4	12702	ADD	6353	29.2576	1.55621	1.38544	617.861	2.16946	0.0300479
711	Arthropathy associated with infections	musculoskeletal	LY6E	8	143018292	chr8:143018292:C:A	C	A	A	28	12376	ADD	6202	25.1193	1.48829	1.35887	464.342	2.16601	0.0303106
244.4	Hypothyroidism NOS	endocrine/metabolic	LY6E	8	143018261	chr8:143018261:G:A	G	A	A	1830	10534	ADD	6182	1.27839	0.113428	1.02356	1.59666	2.16526	0.0303674
756.22	Pectus carinatum	congenital anomalies	LY6E	8	143018292	chr8:143018292:C:A	C	A	A	2	13670	ADD	6836	29.8839	1.56938	1.37904	647.584	2.16475	0.0304068
440.22	Atherosclerosis of native arteries of the extremities with intermittent claudication	circulatory system	LY6E	8	143017718	chr8:143017718:G:C	C	G	G	172	9702	ADD	4937	2.08911	0.340537	1.07176	4.07218	2.16346	0.0305057
426.32	Left bundle branch block	circulatory system	TMPRSS2	21	41508701	chr21:41508701:T:G	G	T	T	626	3868	ADD	2247	1.32194	0.129026	1.02656	1.70231	2.16313	0.0305309
472	Chronic pharyngitis and nasopharyngitis	respiratory	TMPRSS2	21	41508700	chr21:41508700:G:A	G	A	A	280	11070	ADD	5675	1.5121	0.191214	1.03949	2.19959	2.16249	0.0305806
728.7	Fasciitis	musculoskeletal	ACE2	NA	15675734	chrX:15675734:C:T	C	T	T	86	11742	ADD	5914	1.47379	0.179646	1.03638	2.0958	2.15888	0.0308593
452.2	Deep vein thrombosis [DVT]	circulatory system	LY6E	8	143018261	chr8:143018261:G:A	G	A	A	476	8826	ADD	4651	1.50115	0.18818	1.03811	2.17072	2.15874	0.0308702
433.11	Occlusion of cerebral arteries, with cerebral infarction	circulatory system	DPP4	2	162073469	chr2:162073469:A:G	A	G	G	90	10688	ADD	5389	1.53929	0.199836	1.04045	2.27731	2.15839	0.0308975
516	Abnormal sputum	respiratory	TMPRSS2	21	41508701	chr21:41508701:T:G	G	T	T	62	13558	ADD	6810	1.82778	0.279471	1.05691	3.16089	2.15801	0.030927
962	Poisoning by hormones and synthetic substitutes	injuries & poisonings	ACE2	NA	15675734	chrX:15675734:C:T	C	T	T	300	10396	ADD	5348	0.817505	0.0934449	0.680691	0.981818	-2.15633	0.0310577
070	Viral hepatitis	infectious diseases	TMPRSS2	21	41508700	chr21:41508700:G:A	G	A	A	226	11882	ADD	6054	1.55279	0.204314	1.0404	2.31753	2.15382	0.031254
728.7	Fasciitis	musculoskeletal	ACE2	NA	15674766	chrX:15674766:C:G	C	G	G	86	11742	ADD	5914	1.47262	0.179753	1.03535	2.09458	2.15322	0.0313018
793	Nonspecific abnormal findings on radiological and other examination of musculoskeletal system	symptoms	LY6E	8	143018292	chr8:143018292:C:A	C	A	A	8	13870	ADD	6939	24.5464	1.4868	1.33173	452.436	2.15265	0.0313465
872	Traumatic amputation	injuries & poisonings	LY6E	8	143018292	chr8:143018292:C:A	C	A	A	10	13092	ADD	6551	26.9632	1.53058	1.34259	541.502	2.15244	0.0313626
695.1	Toxic erythema	dermatologic	LY6E	8	143018292	chr8:143018292:C:A	C	A	A	2	12078	ADD	6040	26.8555	1.52968	1.33959	538.387	2.15109	0.031469
189.21	Malignant neoplasm of bladder	neoplasms	LY6E	8	143018261	chr8:143018261:G:A	G	A	A	162	13444	ADD	6803	1.78658	0.270119	1.0522	3.03354	2.14833	0.0316876
509.8	Dependence on respirator [Ventilator] or supplemental oxygen	respiratory	LY6E	8	143017718	chr8:143017718:G:C	C	G	G	336	10258	ADD	5297	1.7926	0.271886	1.05209	3.05431	2.14674	0.0318138
619.1	Noninflammatory disorders of ovary, fallopian tube, and broad ligament	genitourinary	LY6E	8	143018292	chr8:143018292:C:A	C	A	A	14	13546	ADD	6780	29.8326	1.58184	1.34347	662.453	2.14662	0.0318237
612.3	Congenital anomalies of breast	genitourinary	LY6E	8	143018292	chr8:143018292:C:A	C	A	A	6	13136	ADD	6571	26.3375	1.52424	1.32783	522.406	2.14599	0.031874
225.2	Benign neoplasm of spinal cord, meninges	neoplasms	LY6E	8	143018292	chr8:143018292:C:A	C	A	A	6	13636	ADD	6821	26.0398	1.52036	1.32283	512.591	2.14398	0.0320342
695.22	Pemphigus and pemphigoid	dermatologic	LY6E	8	143018292	chr8:143018292:C:A	C	A	A	16	12078	ADD	6047	24.3969	1.49017	1.31491	452.66	2.14368	0.0320586
741.4	Joint effusions	musculoskeletal	DPP4	2	162073469	chr2:162073469:A:G	A	G	G	84	13062	ADD	6573	1.56017	0.20753	1.03878	2.34327	2.14329	0.0320894
962	Poisoning by hormones and synthetic substitutes	injuries & poisonings	ACE2	NA	15674766	chrX:15674766:C:G	C	G	G	300	10396	ADD	5348	0.818538	0.0934508	0.681543	0.98307	-2.14268	0.0321389
401.22	Hypertensive chronic kidney disease	circulatory system	ACE2	NA	15674316	chrX:15674316:A:C	C	A	A	1392	3936	ADD	2664	1.11789	0.0520334	1.00951	1.23792	2.14183	0.032207
401.22	Hypertensive chronic kidney disease	circulatory system	ACE2	NA	15674699	chrX:15674699:T:C	C	T	T	1392	3936	ADD	2664	1.11789	0.0520334	1.00951	1.23792	2.14183	0.032207
359.1	Muscular dystrophies	neurological	LY6E	8	143018292	chr8:143018292:C:A	C	A	A	12	13046	ADD	6529	25.318	1.50908	1.31491	487.487	2.14138	0.0322437
756.5	Congenital osteodystrophies	congenital anomalies	LY6E	8	143018292	chr8:143018292:C:A	C	A	A	26	13670	ADD	6848	23.239	1.47112	1.30017	415.369	2.1384	0.0324847
496.21	Obstructive chronic bronchitis	respiratory	DPP4	2	162073222	chr2:162073222:G:A	G	A	A	132	10328	ADD	5230	1.32792	0.132678	1.02385	1.7223	2.13761	0.0325485
270.21	Disorders of urea cycle metabolism	endocrine/metabolic	LY6E	8	143018292	chr8:143018292:C:A	C	A	A	2	13108	ADD	6555	29.6628	1.58588	1.32528	663.921	2.13755	0.0325535
270.2	Disorders of amino-acid metabolism	endocrine/metabolic	LY6E	8	143018292	chr8:143018292:C:A	C	A	A	2	13108	ADD	6555	29.6628	1.58588	1.32528	663.921	2.13755	0.0325535
250.13	Type 1 diabetes with ophthalmic manifestations	endocrine/metabolic	TMPRSS2	21	41508700	chr21:41508700:G:A	G	A	A	44	8660	ADD	4352	1.98127	0.320061	1.05805	3.71006	2.13627	0.0326572
1015	Effects of other external causes	NULL	TMPRSS2	21	41508700	chr21:41508700:G:A	G	A	A	250	13190	ADD	6720	0.513155	0.312311	0.278234	0.94643	-2.13626	0.0326583
613.1	Inflammatory disease of breast	genitourinary	LY6E	8	143018292	chr8:143018292:C:A	C	A	A	6	13604	ADD	6805	27.3397	1.54962	1.31145	569.947	2.13493	0.0327666
870.4	Open wound of nose and sinus	injuries & poisonings	LY6E	8	143018292	chr8:143018292:C:A	C	A	A	4	13092	ADD	6548	25.2237	1.51313	1.29966	489.541	2.13318	0.0329098
285.21	Anemia in chronic kidney disease	hematopoietic	LY6E	8	143018261	chr8:143018261:G:A	G	A	A	252	8640	ADD	4446	1.68268	0.244103	1.04285	2.71508	2.13183	0.0330206
742.2	Pathological, developmental or recurrent dislocation	musculoskeletal	LY6E	8	143018292	chr8:143018292:C:A	C	A	A	2	13062	ADD	6532	32.7123	1.63684	1.3226	809.081	2.13078	0.0331071
313	Pervasive developmental disorders	mental disorders	DPP4	2	162073469	chr2:162073469:A:G	A	G	G	88	13628	ADD	6858	1.49438	0.188556	1.03267	2.16252	2.13045	0.0331344
496.21	Obstructive chronic bronchitis	respiratory	DPP4	2	162073199	chr2:162073199:T:G	T	G	G	132	10328	ADD	5230	1.32656	0.132666	1.02282	1.72049	2.13007	0.0331655
585	Renal failure	genitourinary	LY6E	8	143018261	chr8:143018261:G:A	G	A	A	2532	9094	ADD	5813	1.24431	0.102656	1.01753	1.52163	2.12925	0.0332332
568.1	Peritoneal adhesions (postoperative) (postinfection)	digestive	LY6E	8	143018292	chr8:143018292:C:A	C	A	A	12	12790	ADD	6401	24.8608	1.50986	1.2892	479.413	2.1282	0.0333202
671	Venous/cerebrovascular complications embolism in pregnancy and the puerperium	pregnancy complications	LY6E	8	143018292	chr8:143018292:C:A	C	A	A	14	13832	ADD	6923	35.3438	1.6756	1.32446	943.168	2.12767	0.0333648
530.13	Barrett's esophagus	digestive	LY6E	8	143018261	chr8:143018261:G:A	G	A	A	208	8740	ADD	4474	0.287407	0.586389	0.0910671	0.907052	-2.12633	0.0334757
427.4	Cardiac arrest and ventricular fibrillation	circulatory system	DPP4	2	162074215	chr2:162074215:T:G	G	T	T	234	3868	ADD	2051	1.34409	0.139089	1.02337	1.76531	2.12607	0.0334973
480.1	Bacterial pneumonia	respiratory	TMPRSS2	21	41508700	chr21:41508700:G:A	G	A	A	206	11526	ADD	5866	1.57711	0.214323	1.03617	2.40046	2.12573	0.0335255
420.3	Endocarditis	circulatory system	LY6E	8	143017718	chr8:143017718:G:C	C	G	G	184	9734	ADD	4959	2.02082	0.330953	1.05638	3.86576	2.12569	0.0335289
496.3	Bronchiectasis	respiratory	ACE2	NA	15674766	chrX:15674766:C:G	C	G	G	128	10328	ADD	5228	0.715098	0.15789	0.524771	0.974455	-2.12386	0.0336821
204.21	Myeloid leukemia, acute	neoplasms	LY6E	8	143018292	chr8:143018292:C:A	C	A	A	12	13268	ADD	6640	27.6182	1.56314	1.29017	591.21	2.12295	0.0337577
389	Hearing loss	sense organs	TMPRSS2	21	41508701	chr21:41508701:T:G	G	T	T	642	12600	ADD	6621	0.734901	0.14509	0.553004	0.97663	-2.12294	0.0337585
608	Other disorders of male genital organs	genitourinary	DPP4	2	162074215	chr2:162074215:T:G	G	T	T	86	11416	ADD	5751	0.704895	0.16503	0.510095	0.974089	-2.11904	0.034087
962	Poisoning by hormones and synthetic substitutes	injuries & poisonings	ACE2	NA	15675244	chrX:15675244:A:G	G	A	A	300	10396	ADD	5348	1.21854	0.0933123	1.01487	1.46308	2.11819	0.0341593
962	Poisoning by hormones and synthetic substitutes	injuries & poisonings	ACE2	NA	15675338	chrX:15675338:T:A	A	T	T	300	10396	ADD	5348	1.21854	0.0933123	1.01487	1.46308	2.11819	0.0341593
296.2	Depression	mental disorders	TMPRSS2	21	41508700	chr21:41508700:G:A	G	A	A	1164	8620	ADD	4892	1.2584	0.108597	1.01714	1.55689	2.11647	0.0343047
334.21	Amyotrophic Lateral Sclerosis	neurological	LY6E	8	143018292	chr8:143018292:C:A	C	A	A	6	12132	ADD	6069	27.0056	1.55784	1.27473	572.123	2.11578	0.0343638
440.2	Atherosclerosis of the extremities	circulatory system	ACE2	NA	15675734	chrX:15675734:C:T	C	T	T	240	9702	ADD	4971	1.24612	0.104021	1.01629	1.52793	2.11531	0.0344039
189.11	Malignant neoplasm of kidney, except pelvis	neoplasms	LY6E	8	143018292	chr8:143018292:C:A	C	A	A	136	13444	ADD	6790	7.34398	0.944397	1.15361	46.7524	2.11127	0.0347488
705.1	Dyshidrosis	dermatologic	LY6E	8	143018292	chr8:143018292:C:A	C	A	A	2	12772	ADD	6387	26.2808	1.54952	1.26091	547.763	2.10958	0.0348943
962	Poisoning by hormones and synthetic substitutes	injuries & poisonings	ACE2	NA	15674316	chrX:15674316:A:C	C	A	A	300	10396	ADD	5348	1.21751	0.093325	1.01399	1.46188	2.10887	0.0349561
110.1	Dermatophytosis	infectious diseases	LY6E	8	143017718	chr8:143017718:G:C	C	G	G	194	12460	ADD	6327	1.79889	0.278485	1.04222	3.10493	2.10845	0.0349922
285.1	Acute posthemorrhagic anemia	hematopoietic	LY6E	8	143018261	chr8:143018261:G:A	G	A	A	212	8640	ADD	4426	1.7215	0.257632	1.03899	2.85235	2.10841	0.0349954
550.4	Umbilical hernia	digestive	DPP4	2	162074215	chr2:162074215:T:G	G	T	T	98	12220	ADD	6159	1.42232	0.167102	1.02508	1.97348	2.10821	0.0350129
250.1	Type 1 diabetes	endocrine/metabolic	TMPRSS2	21	41508700	chr21:41508700:G:A	G	A	A	242	8660	ADD	4451	1.52785	0.201085	1.03019	2.26592	2.10786	0.0350435
274.1	Gout	endocrine/metabolic	ACE2	NA	15674766	chrX:15674766:C:G	C	G	G	826	12538	ADD	6682	0.892413	0.0540144	0.802766	0.992072	-2.10733	0.0350894
134.1	Intestinal helminthiases	infectious diseases	LY6E	8	143018292	chr8:143018292:C:A	C	A	A	6	13244	ADD	6625	30.4877	1.62222	1.2685	732.756	2.10657	0.0351545
440.2	Atherosclerosis of the extremities	circulatory system	ACE2	NA	15674766	chrX:15674766:C:G	C	G	G	240	9702	ADD	4971	1.24494	0.104035	1.0153	1.52653	2.10592	0.0352112
385.5	Tympanosclerosis and middle ear disease related to otitis media	sense organs	LY6E	8	143018292	chr8:143018292:C:A	C	A	A	2	13174	ADD	6588	26.7447	1.56124	1.25403	570.381	2.10495	0.0352953
620.1	Dysplasia of cervix	genitourinary	LY6E	8	143018292	chr8:143018292:C:A	C	A	A	4	13760	ADD	6882	23.5658	1.50116	1.24305	446.762	2.1049	0.0353002
962	Poisoning by hormones and synthetic substitutes	injuries & poisonings	ACE2	NA	15674699	chrX:15674699:T:C	C	T	T	300	10396	ADD	5348	1.21696	0.0933191	1.01354	1.46119	2.10409	0.0353703
315.3	Mental retardation	mental disorders	LY6E	8	143018292	chr8:143018292:C:A	C	A	A	2	13628	ADD	6815	25.7603	1.54479	1.24744	531.963	2.10309	0.0354581
931	Contact dermatitis and other eczema due to plants [except food]	dermatologic	LY6E	8	143018292	chr8:143018292:C:A	C	A	A	10	11688	ADD	5849	22.5823	1.48252	1.23551	412.752	2.10262	0.0354993
522.1	Pulpitis and necrosis of tooth pulp	digestive	LY6E	8	143018292	chr8:143018292:C:A	C	A	A	2	13238	ADD	6620	25.2823	1.53646	1.24445	513.636	2.1023	0.0355271
564	Functional digestive disorders	digestive	DPP4	2	162073222	chr2:162073222:G:A	G	A	A	200	10794	ADD	5497	1.35604	0.144988	1.02061	1.80172	2.10064	0.0356729
626.15	Infertility, female, associated with anovulation	genitourinary	LY6E	8	143018292	chr8:143018292:C:A	C	A	A	8	12890	ADD	6449	32.0069	1.65025	1.26051	812.717	2.10026	0.0357063
752	Nervous system congenital anomalies	congenital anomalies	LY6E	8	143018292	chr8:143018292:C:A	C	A	A	4	13786	ADD	6895	22.9698	1.49263	1.23205	428.242	2.09977	0.0357493
174.11	Malignant neoplasm of female breast	neoplasms	TMPRSS2	21	41508701	chr21:41508701:T:G	G	T	T	298	12630	ADD	6464	1.4482	0.176368	1.02496	2.04623	2.09972	0.0357534
170	Cancer of bone and connective tissue	neoplasms	TMPRSS2	21	41508701	chr21:41508701:T:G	G	T	T	40	13820	ADD	6930	2.23027	0.382208	1.05444	4.71729	2.09865	0.0358477
444	Arterial embolism and thrombosis	circulatory system	TMPRSS2	21	41508701	chr21:41508701:T:G	G	T	T	112	9702	ADD	4907	1.62274	0.230691	1.03249	2.55043	2.09855	0.0358564
694.1	Vitiligo	dermatologic	LY6E	8	143017718	chr8:143017718:G:C	C	G	G	8	12078	ADD	6043	4.51868	0.718725	1.10467	18.4838	2.09846	0.0358641
986	Toxic effect of carbon monoxide	injuries & poisonings	LY6E	8	143018292	chr8:143018292:C:A	C	A	A	4	13766	ADD	6885	25.1632	1.5391	1.23221	513.863	2.09563	0.0361148
876	Posttraumatic wound infection not elsewhere classified	injuries & poisonings	LY6E	8	143018292	chr8:143018292:C:A	C	A	A	18	13092	ADD	6555	26.42	1.56564	1.22816	568.343	2.09123	0.0365075
550.6	Incisional hernia	digestive	LY6E	8	143018261	chr8:143018261:G:A	G	A	A	190	12220	ADD	6205	1.75877	0.270086	1.03589	2.98612	2.0905	0.0365726
473.3	Paralysis/spasm of vocal cords or larynx	respiratory	LY6E	8	143017718	chr8:143017718:G:C	C	G	G	88	11070	ADD	5579	1.94625	0.318641	1.04225	3.63435	2.08982	0.0366335
180.3	Cervical intraepithelial neoplasia [CIN] [Cervical dysplasia]	neoplasms	LY6E	8	143017718	chr8:143017718:G:C	C	G	G	28	12520	ADD	6274	3.56498	0.609125	1.08036	11.7637	2.08686	0.036901
263	Other nutritional deficiency	endocrine/metabolic	TMPRSS2	21	41508700	chr21:41508700:G:A	G	A	A	50	11208	ADD	5629	2.13563	0.363817	1.04676	4.35721	2.08556	0.0370182
564	Functional digestive disorders	digestive	DPP4	2	162073199	chr2:162073199:T:G	T	G	G	200	10794	ADD	5497	1.35326	0.145086	1.01832	1.79837	2.0851	0.0370598
[truncated: 25,154 more rows]
