# Supplementary material for: Impact of natural selection on global patterns of genetic variation, and association with clinical phenotypes, at genes involved in SARS-CoV-2 infection
Source: Res Sq. 2021 Jul 27:rs.3.rs-673011. Preprint. [Version 1] doi: 10.21203/rs.3.rs-673011/v1 (PMC8328070; doi:10.21203/rs.3.rs-673011/v1)
Supplement: Supplement 11 [file cb67492cc8405f7950ab8389.xlsx]

## Sheet: TopMed_1KG.TMPRSS2_extend_enhan
chrom	position	rsid	ref	alt	ancestor	minor_allele	maf_all	missing_rate	EAS	EUR	AFR	AMR	SAS	AFR_TopMed_1KG	Kenya.Nilo-Saharan	Cameroon.NigerKordofanian	Tanzania.Afroasiatic	Kenya.Afroasiatic	Botswana.Khoesan	Botswana.Niger-Kordofanian	Ethiopia.Afroasiatic	Cameroon.Pygmy	Ethiopia.Niolo-Saharan	Tanzania.Hadzabe	Cameroon.Fulani	Tanzania.Sandawe	Ethiopia.Sabue	info	CLIN_SIG	Condel	CADD_PHRED	LoFtool	SIFT	PolyPhen
21	41467744	rs572530227	C	T	C	T	0.000199681	0.513692	0	0	0	0.00144092	0	0	N	N	N	N	N	N	N	N	N	N	N	N	N	CSQ=T|missense_variant|MODERATE|TMPRSS2|ENSG00000184012|Transcript|ENST00000332149.10|protein_coding|13/14||||1591|1457|486|R/Q|cGa/cAa|rs572530227||-1||HGNC|HGNC:11876|NM_005656.4|1|P3|tolerated(0.59)|benign(0)|0.0002|0|0.0014|0|0|0|3.981e-06|0|2.894e-05|0|0|0|0|0|0||||30680235|||||neutral(0.004)|6.796|0.442586|0.166,T|missense_variant|MODERATE|TMPRSS2|ENSG00000184012|Transcript|ENST00000398585.…	N	neutral(0.004)	6.796	0.166	tolerated(0.59)	benign(0)
21	41467759	rs541351488	G	A	G	A	0.000399361	0.513692	0	0	0	0	0.00204499	0	N	N	N	N	N	N	N	N	N	N	N	N	N	CSQ=A|missense_variant|MODERATE|TMPRSS2|ENSG00000184012|Transcript|ENST00000332149.10|protein_coding|13/14||||1576|1442|481|T/M|aCg/aTg|rs541351488&COSV59825846||-1||HGNC|HGNC:11876|NM_005656.4|1|P3|tolerated(0.22)|benign(0.33)|0.0004|0|0|0|0|0.002|2.387e-05|0|0|0|5.437e-05|9.243e-05|0|0.0001631|6.533e-05||0&1|0&1||||||neutral(0.145)|19.50|2.117618|0.166,A|missense_variant|MODERATE|TMPRSS2|ENSG00…	N	neutral(0.145)	19.5	0.166	tolerated(0.22)	benign(0.33)
21	41468410	.	C	T	C	T	0.000378072	0.486308	N	N	N	N	N	0.000474158	0	0	0	0	0	0	0.00197628	0	0	0	0	0	0	CSQ=T|missense_variant|MODERATE|TMPRSS2|ENSG00000184012|Transcript|ENST00000332149.10|protein_coding|12/14||||1434|1300|434|V/I|Gtc/Atc|rs1330117456||-1||HGNC|HGNC:11876|NM_005656.4|1|P3|tolerated(0.51)|benign(0.079)|||||||3.977e-06|0|0|0|0|0|0|0.000163|0|||||||||neutral(0.014)|5.319|0.301667|0.166,T|missense_variant|MODERATE|TMPRSS2|ENSG00000184012|Transcript|ENST00000398585.7|protein_coding|12/…	N	neutral(0.014)	5.319	0.166	tolerated(0.51)	benign(0.079)
21	41468415	rs570454392	C	G	C	G	0.000199681	0.513692	0	0	0.00075643	0	0	0.00075643	N	N	N	N	N	N	N	N	N	N	N	N	N	CSQ=G|missense_variant|MODERATE|TMPRSS2|ENSG00000184012|Transcript|ENST00000332149.10|protein_coding|12/14||||1429|1295|432|G/A|gGg/gCg|rs570454392&COSV59823519||-1||HGNC|HGNC:11876|NM_005656.4|1|P3|deleterious(0)|probably_damaging(1)|0.0002|0.0008|0|0|0|0|3.977e-06|6.153e-05|0|0|0|0|0|0|0||0&1|0&1|30680235|||||deleterious(0.945)|24.0|3.406041|0.166,G|missense_variant|MODERATE|TMPRSS2|ENSG0000018…	N	deleterious(0.945)	24	0.166	deleterious(0)	probably_damaging(1)
21	41468503	rs367866934	G	A	G	A	0.010397	0.486308	N	N	N	N	N	0.0130394	0	0.0111111	0	0	0	0	0	0.0856164	0	0	0	0	0	CSQ=A|missense_variant|MODERATE|TMPRSS2|ENSG00000184012|Transcript|ENST00000332149.10|protein_coding|12/14||||1341|1207|403|L/F|Ctt/Ttt|rs367866934||-1||HGNC|HGNC:11876|NM_005656.4|1|P3|deleterious(0.05)|benign(0.013)||||||||||||||||||||||||neutral(0.346)|15.03|1.385626|0.166,A|missense_variant|MODERATE|TMPRSS2|ENSG00000184012|Transcript|ENST00000398585.7|protein_coding|12/14||||1379|1318|440|L/F…	N	neutral(0.346)	15.03	0.166	deleterious(0.05)	benign(0.013)
21	41468515	rs185312677	C	T	C	T	0.000199681	0.513692	0	0	0.00075643	0	0	0.00075643	N	N	N	N	N	N	N	N	N	N	N	N	N	CSQ=T|missense_variant|MODERATE|TMPRSS2|ENSG00000184012|Transcript|ENST00000332149.10|protein_coding|12/14||||1329|1195|399|A/T|Gct/Act|rs185312677||-1||HGNC|HGNC:11876|NM_005656.4|1|P3|tolerated(0.47)|possibly_damaging(0.794)|0.0002|0.0008|0|0|0|0|||||||||||||30680235|||||neutral(0.309)|17.34|1.780394|0.166,T|missense_variant|MODERATE|TMPRSS2|ENSG00000184012|Transcript|ENST00000398585.7|protein_…	N	neutral(0.309)	17.34	0.166	tolerated(0.47)	possibly_damaging(0.794)
21	41470657	rs147233451	C	T	C	T	0.000199681	0.513692	0	0	0.00075643	0	0	0.00075643	N	N	N	N	N	N	N	N	N	N	N	N	N	CSQ=T|missense_variant|MODERATE|TMPRSS2|ENSG00000184012|Transcript|ENST00000332149.10|protein_coding|11/14||||1296|1162|388|E/K|Gag/Aag|rs147233451&COSV59825254||-1||HGNC|HGNC:11876|NM_005656.4|1|P3|tolerated(0.13)|benign(0.069)|0.0002|0.0008|0|0|0|0|1.602e-05|0.0001241|2.898e-05|0|0|0|8.887e-06|0|0||0&1|0&1|30680235|||||neutral(0.257)|2.016|0.028276|0.166,T|missense_variant|MODERATE|TMPRSS2|ENSG…	N	neutral(0.257)	2.016	0.166	tolerated(0.13)	benign(0.069)
21	41470663	rs369579311	C	T	C	T	0.00189036	0.486308	N	N	N	N	N	0.00237079	0	0.00222222	0	0	0	0	0	0	0	0	0.0304054	0	0	CSQ=T|missense_variant|MODERATE|TMPRSS2|ENSG00000184012|Transcript|ENST00000332149.10|protein_coding|11/14||||1290|1156|386|A/T|Gcc/Acc|rs369579311||-1||HGNC|HGNC:11876|NM_005656.4|1|P3|tolerated(0.2)|benign(0.255)|||||||2.003e-05|0.0003101|0|0|0|0|0|0|0|||||||||neutral(0.075)|16.09|1.566720|0.166,T|missense_variant|MODERATE|TMPRSS2|ENSG00000184012|Transcript|ENST00000398585.7|protein_coding|11/1…	N	neutral(0.075)	16.09	0.166	tolerated(0.2)	benign(0.255)
21	41470696	rs61735795	G	A	G	A	0.00926276	0.486308	N	N	N	N	N	0.00877193	0	0.0133333	0	0	0.10241	0	0.000988142	0.0222603	0	0	0	0	0	CSQ=A|missense_variant|MODERATE|TMPRSS2|ENSG00000184012|Transcript|ENST00000332149.10|protein_coding|11/14||||1257|1123|375|P/S|Cca/Tca|rs61735795||-1||HGNC|HGNC:11876|NM_005656.4|1|P3|tolerated(0.15)|benign(0.14)|||||||0.0002159|0.003156|5.787e-05|0|0|0|8.866e-06|0|0|||||||||neutral(0.253)|10.87|0.893410|0.166,A|missense_variant|MODERATE|TMPRSS2|ENSG00000184012|Transcript|ENST00000398585.7|prote…	N	neutral(0.253)	10.87	0.166	tolerated(0.15)	benign(0.14)
21	41471814	.	G	C	G	C	0.000189036	0.486308	N	N	N	N	N	0.000237079	0	0	0	0	0	0	0.000988142	0	0	0	0	0	0	CSQ=C|missense_variant|MODERATE|TMPRSS2|ENSG00000184012|Transcript|ENST00000332149.10|protein_coding|10/14||||1201|1067|356|T/S|aCt/aGt|||-1||HGNC|HGNC:11876|NM_005656.4|1|P3|tolerated(0.32)|benign(0.14)||||||||||||||||||||||||neutral(0.036)|17.65|1.833749|0.166,C|missense_variant|MODERATE|TMPRSS2|ENSG00000184012|Transcript|ENST00000398585.7|protein_coding|10/14||||1239|1178|393|T/S|aCt/aGt|||-1|…	N	neutral(0.036)	17.65	0.166	tolerated(0.32)	benign(0.14)
21	41471868	rs545726689	T	A	T	A	0.000199681	0.513692	0	0	0	0	0.00102249	0	N	N	N	N	N	N	N	N	N	N	N	N	N	CSQ=A|missense_variant|MODERATE|TMPRSS2|ENSG00000184012|Transcript|ENST00000332149.10|protein_coding|10/14||||1147|1013|338|D/V|gAc/gTc|rs545726689&COSV59823293||-1||HGNC|HGNC:11876|NM_005656.4|1|P3|deleterious(0)|probably_damaging(0.962)|0.0002|0|0|0|0|0.001|7.987e-06|0|0|0|0|0|0|0|6.534e-05||0&1|0&1|30680235|||||deleterious(0.850)|26.8|4.247698|0.166,A|missense_variant|MODERATE|TMPRSS2|ENSG0000…	N	deleterious(0.850)	26.8	0.166	deleterious(0)	probably_damaging(0.962)
21	41471895	rs565237319	T	C	T	C	0.000199681	0.513692	0	0	0	0	0.00102249	0	N	N	N	N	N	N	N	N	N	N	N	N	N	CSQ=C|missense_variant|MODERATE|TMPRSS2|ENSG00000184012|Transcript|ENST00000332149.10|protein_coding|10/14||||1120|986|329|E/G|gAa/gGa|rs565237319||-1||HGNC|HGNC:11876|NM_005656.4|1|P3|tolerated(0.3)|benign(0.02)|0.0002|0|0|0|0|0.001|0.0001558|0|0|0|0|0|0|0.0001636|0.001241||||30680235|||||neutral(0.030)|15.46|1.458284|0.166,C|missense_variant|MODERATE|TMPRSS2|ENSG00000184012|Transcript|ENST00000…	N	neutral(0.030)	15.46	0.166	tolerated(0.3)	benign(0.02)
21	41471916	rs144046631	T	C	T	C	0.00132325	0.486308	N	N	N	N	N	0.00142248	0	0	0.0210526	0	0	0	0	0	0	0	0	0.010989	0	CSQ=C|missense_variant|MODERATE|TMPRSS2|ENSG00000184012|Transcript|ENST00000332149.10|protein_coding|10/14||||1099|965|322|Y/C|tAt/tGt|rs144046631||-1||HGNC|HGNC:11876|NM_005656.4|1|P3|tolerated(0.07)|probably_damaging(0.932)|||||||3.594e-05|0.0004943|0|0|0|0|8.858e-06|0|0|||||||||deleterious(0.698)|22.4|2.663528|0.166,C|missense_variant|MODERATE|TMPRSS2|ENSG00000184012|Transcript|ENST00000398585…	N	deleterious(0.698)	22.4	0.166	tolerated(0.07)	probably_damaging(0.932)
21	41471917	rs527684898	A	G	A	G	0.000199681	0.513692	0	0	0	0.00144092	0	0	N	N	N	N	N	N	N	N	N	N	N	N	N	CSQ=G|missense_variant|MODERATE|TMPRSS2|ENSG00000184012|Transcript|ENST00000332149.10|protein_coding|10/14||||1098|964|322|Y/H|Tat/Cat|rs527684898||-1||HGNC|HGNC:11876|NM_005656.4|1|P3|tolerated(0.24)|benign(0.035)|0.0002|0|0.0014|0|0|0|3.994e-06|0|2.894e-05|0|0|0|0|0|0|||||||||neutral(0.040)|16.15|1.576244|0.166,G|missense_variant|MODERATE|TMPRSS2|ENSG00000184012|Transcript|ENST00000398585.7|pro…	N	neutral(0.040)	16.15	0.166	tolerated(0.24)	benign(0.035)
21	41471967	rs540987630	G	T	G	T	0.000199681	0.513692	0	0	0	0	0.00102249	0	N	N	N	N	N	N	N	N	N	N	N	N	N	CSQ=T|missense_variant|MODERATE|TMPRSS2|ENSG00000184012|Transcript|ENST00000332149.10|protein_coding|10/14||||1048|914|305|P/Q|cCa/cAa|rs540987630&COSV59827357||-1||HGNC|HGNC:11876|NM_005656.4|1|P3|deleterious(0)|probably_damaging(0.973)|0.0002|0|0|0|0|0.001|1.604e-05|0|0|0|0|0|0|0|0.0001312||0&1|0&1|30680235|||||deleterious(0.859)|23.8|3.324678|0.166,T|missense_variant|MODERATE|TMPRSS2|ENSG00000…	N	deleterious(0.859)	23.8	0.166	deleterious(0)	probably_damaging(0.973)
21	41471979	rs561063944	G	A	G	A	0.000199681	0.513692	0	0	0.00075643	0	0	0.00075643	N	N	N	N	N	N	N	N	N	N	N	N	N	CSQ=A|missense_variant&splice_region_variant|MODERATE|TMPRSS2|ENSG00000184012|Transcript|ENST00000332149.10|protein_coding|10/14||||1036|902|301|P/L|cCt/cTt|rs561063944||-1||HGNC|HGNC:11876|NM_005656.4|1|P3|tolerated(0.14)|benign(0.021)|0.0002|0.0008|0|0|0|0|1.635e-05|0.000249|0|0|0|0|0|0|0||||30680235|||||neutral(0.251)|18.78|2.010212|0.166,A|missense_variant&splice_region_variant|MODERATE|TMPRS…	N	neutral(0.251)	18.78	0.166	tolerated(0.14)	benign(0.021)
21	41473359	rs530689404	C	T	C	T	0.000199681	0.513692	0	0	0	0	0.00102249	0	N	N	N	N	N	N	N	N	N	N	N	N	N	CSQ=T|missense_variant|MODERATE|TMPRSS2|ENSG00000184012|Transcript|ENST00000332149.10|protein_coding|9/14||||999|865|289|E/K|Gag/Aag|rs530689404&COSV59823801||-1||HGNC|HGNC:11876|NM_005656.4|1|P3|tolerated(0.36)|benign(0.031)|0.0002|0|0|0|0|0.001|2.07e-05|0.0001992|0|0|5.536e-05|0|0|0|3.361e-05||0&1|0&1|30680235|||||neutral(0.022)|16.99|1.721830|0.166,T|missense_variant|MODERATE|TMPRSS2|ENSG00000…	N	neutral(0.022)	16.99	0.166	tolerated(0.36)	benign(0.031)
21	41473376	rs544474510	C	G	C	G	0.000199681	0.513692	0.000992063	0	0	0	0	0	N	N	N	N	N	N	N	N	N	N	N	N	N	CSQ=G|missense_variant|MODERATE|TMPRSS2|ENSG00000184012|Transcript|ENST00000332149.10|protein_coding|9/14||||982|848|283|G/A|gGc/gCc|rs544474510||-1||HGNC|HGNC:11876|NM_005656.4|1|P3|deleterious(0.01)|possibly_damaging(0.651)|0.0002|0|0|0.001|0|0|8.202e-06|0|0|0|0.0001101|0|0|0|0||||30680235|||||deleterious(0.635)|25.6|3.954869|0.166,G|missense_variant|MODERATE|TMPRSS2|ENSG00000184012|Transcript|…	N	deleterious(0.635)	25.6	0.166	deleterious(0.01)	possibly_damaging(0.651)
21	41473401	.	C	A	C	A	0.000567108	0.486308	N	N	N	N	N	0.000711238	0	0	0	0	0	0	0.00296443	0	0	0	0	0	0	CSQ=A|missense_variant|MODERATE|TMPRSS2|ENSG00000184012|Transcript|ENST00000332149.10|protein_coding|9/14||||957|823|275|V/F|Gtc/Ttc|COSV59826010||-1||HGNC|HGNC:11876|NM_005656.4|1|P3|tolerated(0.14)|benign(0.133)|||||||||||||||||1|1||||||neutral(0.261)|16.02|1.553391|0.166,A|missense_variant|MODERATE|TMPRSS2|ENSG00000184012|Transcript|ENST00000398585.7|protein_coding|9/14||||995|934|312|V/F|Gtc/…	N	neutral(0.261)	16.02	0.166	tolerated(0.14)	benign(0.133)
21	41473439	rs150445636	G	A	G	A	0.000399361	0.513692	0	0	0.00151286	0	0	0.00151286	N	N	N	N	N	N	N	N	N	N	N	N	N	CSQ=A|missense_variant|MODERATE|TMPRSS2|ENSG00000184012|Transcript|ENST00000332149.10|protein_coding|9/14||||919|785|262|A/V|gCg/gTg|rs150445636&COSV59823597||-1||HGNC|HGNC:11876|NM_005656.4|1|P3|deleterious(0.04)|probably_damaging(0.969)|0.0004|0.0015|0|0|0|0|0.0001363|0.0005243|8.82e-05|0.001431|0.0001106|0|2.764e-05|0.0001682|6.691e-05||0&1|0&1||||||deleterious(0.760)|24.4|3.568475|0.166,A|mis…	N	deleterious(0.760)	24.4	0.166	deleterious(0.04)	probably_damaging(0.969)
21	41473449	rs537370123	C	T	C	T	0.000199681	0.513692	0	0	0	0.00144092	0	0	N	N	N	N	N	N	N	N	N	N	N	N	N	CSQ=T|missense_variant|MODERATE|TMPRSS2|ENSG00000184012|Transcript|ENST00000332149.10|protein_coding|9/14||||909|775|259|G/S|Ggc/Agc|rs537370123&COSV59825482||-1||HGNC|HGNC:11876|NM_005656.4|1|P3|deleterious(0)|probably_damaging(0.975)|0.0002|0|0.0014|0|0|0|2.48e-05|0|2.943e-05|0|0|0|4.617e-05|0|0||0&1|0&1|30680235|||||deleterious(0.861)|23.6|3.214368|0.166,T|missense_variant|MODERATE|TMPRSS2|ENS…	N	deleterious(0.861)	23.6	0.166	deleterious(0)	probably_damaging(0.975)
21	41476579	rs181414852	A	G	A	G	0.000199681	0.513692	0	0	0	0.00144092	0	0	N	N	N	N	N	N	N	N	N	N	N	N	N	CSQ=G|missense_variant&splice_region_variant|MODERATE|TMPRSS2|ENSG00000184012|Transcript|ENST00000332149.10|protein_coding|8/14||||859|725|242|I/T|aTa/aCa|rs181414852||-1||HGNC|HGNC:11876|NM_005656.4|1|P3|deleterious(0.05)|benign(0.097)|0.0002|0|0.0014|0|0|0|1.595e-05|0|8.677e-05|0|0|0|8.837e-06|0|0||||30680235|||||neutral(0.353)|19.07|2.053609|0.166,G|missense_variant&splice_region_variant|MODER…	N	neutral(0.353)	19.07	0.166	deleterious(0.05)	benign(0.097)
21	41476609	rs547544037	G	A	G	A	0.000399361	0.513692	0	0	0	0	0.00204499	0	N	N	N	N	N	N	N	N	N	N	N	N	N	CSQ=A|missense_variant|MODERATE|TMPRSS2|ENSG00000184012|Transcript|ENST00000332149.10|protein_coding|8/14||||829|695|232|S/F|tCt/tTt|rs547544037&COSV59821554||-1||HGNC|HGNC:11876|NM_005656.4|1|P3|tolerated(0.23)|benign(0.015)|0.0004|0|0|0|0|0.002|9.585e-05|0|0|0|0|0|0|0|0.0007842||0&1|0&1|30680235|||||neutral(0.042)|17.49|1.806736|0.166,A|missense_variant|MODERATE|TMPRSS2|ENSG00000184012|Transcri…	N	neutral(0.042)	17.49	0.166	tolerated(0.23)	benign(0.015)
21	41479208	rs201661208	G	A	G	A	0.000199681	0.513692	0.000992063	0	0	0	0	0	N	N	N	N	N	N	N	N	N	N	N	N	N	CSQ=A|missense_variant|MODERATE|TMPRSS2|ENSG00000184012|Transcript|ENST00000332149.10|protein_coding|7/14||||781|647|216|A/V|gCc/gTc|rs201661208||-1||HGNC|HGNC:11876|NM_005656.4|1|P3|tolerated(0.11)|benign(0.091)|0.0002|0|0|0.001|0|0|3.978e-06|0|0|0|5.437e-05|0|0|0|0|||||||||neutral(0.278)|14.52|1.303227|0.166,A|missense_variant|MODERATE|TMPRSS2|ENSG00000184012|Transcript|ENST00000398585.7|protei…	N	neutral(0.278)	14.52	0.166	tolerated(0.11)	benign(0.091)
21	41479230	rs150554820	A	T	A	T	0.000199681	0.513692	0	0	0	0.00144092	0	0	N	N	N	N	N	N	N	N	N	N	N	N	N	CSQ=T|missense_variant|MODERATE|TMPRSS2|ENSG00000184012|Transcript|ENST00000332149.10|protein_coding|7/14||||759|625|209|F/I|Ttt/Att|rs150554820&COSV59828364||-1||HGNC|HGNC:11876|NM_005656.4|1|P3|deleterious(0.03)|benign(0.438)|0.0002|0|0.0014|0|0|0|0.0004653|6.152e-05|0.0004626|0.005359|0|0|0.0003605|0.0008146|0||0&1|0&1||||||deleterious(0.507)|23.7|3.238120|0.166,T|missense_variant|MODERATE|TMP…	N	deleterious(0.507)	23.7	0.166	deleterious(0.03)	benign(0.438)
21	41479275	rs139926880	A	C	A	C	0.00491493	0.486308	N	N	N	N	N	0.00545282	0	0.00222222	0	0	0	0.00980392	0	0.0359589	0	0	0	0	0	CSQ=C|missense_variant|MODERATE|TMPRSS2|ENSG00000184012|Transcript|ENST00000332149.10|protein_coding|7/14||||714|580|194|F/V|Ttt/Gtt|rs139926880||-1||HGNC|HGNC:11876|NM_005656.4|1|P3|tolerated(0.12)|possibly_damaging(0.849)|||||||3.992e-05|0.0004937|5.826e-05|0|0|0|0|0|0|||||||||deleterious(0.587)|23.8|3.285837|0.166,C|missense_variant|MODERATE|TMPRSS2|ENSG00000184012|Transcript|ENST00000398585.7…	N	deleterious(0.587)	23.8	0.166	tolerated(0.12)	possibly_damaging(0.849)
21	41480517	.	G	C	G	C	0.000567108	0.486308	N	N	N	N	N	0.000711238	0	0	0	0	0.0180723	0	0	0	0	0	0	0	0	CSQ=C|missense_variant|MODERATE|TMPRSS2|ENSG00000184012|Transcript|ENST00000332149.10|protein_coding|6/14||||665|531|177|N/K|aaC/aaG|||-1||HGNC|HGNC:11876|NM_005656.4|1|P3|deleterious(0.01)|possibly_damaging(0.591)||||||||||||||||||||||||deleterious(0.610)|6.939|0.457698|0.166,C|missense_variant|MODERATE|TMPRSS2|ENSG00000184012|Transcript|ENST00000398585.7|protein_coding|6/14||||703|642|214|N/K|a…	N	deleterious(0.610)	6.939	0.166	deleterious(0.01)	possibly_damaging(0.591)
21	41480570	rs12329760	C	T	C	T	0.291124	0	0.362103	0.235586	0.286687	0.154179	0.225971	0.30704	0.353333	0.271111	0.352632	0.328125	0.301205	0.254902	0.275692	0.280822	0.451613	0.378747	0.263514	0.362637	0.486842	CSQ=T|missense_variant|MODERATE|TMPRSS2|ENSG00000184012|Transcript|ENST00000332149.10|protein_coding|6/14||||612|478|160|V/M|Gtg/Atg|rs12329760&COSV59820912||-1||HGNC|HGNC:11876|NM_005656.4|1|P3|deleterious(0.01)|probably_damaging(0.937)|0.2614|0.2867|0.1542|0.3621|0.2356|0.226|0.2449|0.2937|0.1529|0.1362|0.381|0.3709|0.2299|0.2243|0.2477||0&1|0&1|18694509&30505817&23334893&20735386&30680235|||||…	N	deleterious(0.788)	24.3	0.166	deleterious(0.01)	probably_damaging(0.937)
21	41489549	rs190265904	G	A	G	A	0.000199681	0.513692	0.000992063	0	0	0	0	0	N	N	N	N	N	N	N	N	N	N	N	N	N	CSQ=A|missense_variant|MODERATE|TMPRSS2|ENSG00000184012|Transcript|ENST00000332149.10|protein_coding|4/14||||417|283|95|L/F|Ctc/Ttc|rs190265904||-1||HGNC|HGNC:11876|NM_005656.4|1|P3|deleterious(0)|possibly_damaging(0.894)|0.0002|0|0|0.001|0|0|4.773e-05|0|0|0|0.0004349|0|1.759e-05|0|6.533e-05|||||||||deleterious(0.796)|21.5|2.428648|0.166,A|missense_variant|MODERATE|TMPRSS2|ENSG00000184012|Transcr…	N	deleterious(0.796)	21.5	0.166	deleterious(0)	possibly_damaging(0.894)
21	41489560	rs147711290	A	T	A	T	0.00223344	0	0	0	0.00453858	0.00144092	0	0.00270758	0	0.0111111	0.00526316	0	0	0.00980392	0	0.00342466	0	0	0	0	0	CSQ=T|missense_variant|MODERATE|TMPRSS2|ENSG00000184012|Transcript|ENST00000332149.10|protein_coding|4/14||||406|272|91|L/Q|cTg/cAg|rs147711290||-1||HGNC|HGNC:11876|NM_005656.4|1|P3|deleterious(0.01)|possibly_damaging(0.906)|0.0014|0.0045|0.0014|0|0|0|0.0004416|0.006585|8.673e-05|0|0|0|0|0|3.266e-05|||||||||deleterious(0.765)|22.8|2.820767|0.166,T|missense_variant|MODERATE|TMPRSS2|ENSG00000184012…	N	deleterious(0.765)	22.8	0.166	deleterious(0.01)	possibly_damaging(0.906)
21	41494370	rs61735793	G	A	G	A	0.00259585	0.513692	0	0.00795229	0	0.00288184	0.00306748	0	N	N	N	N	N	N	N	N	N	N	N	N	N	CSQ=A|missense_variant|MODERATE|TMPRSS2|ENSG00000184012|Transcript|ENST00000332149.10|protein_coding|3/14||||358|224|75|T/I|aCa/aTa|rs61735793||-1||HGNC|HGNC:11876|NM_005656.4|1|P3|tolerated(0.18)|benign(0.011)|0.0026|0|0.0029|0|0.008|0.0031|0.007035|0.001423|0.003006|0.008115|0|0.01085|0.0101|0.007608|0.00406|||||||||neutral(0.057)|4.742|0.253500|0.166,A|missense_variant|MODERATE|TMPRSS2|ENSG000…	N	neutral(0.057)	4.742	0.166	tolerated(0.18)	benign(0.011)
21	41494374	rs114363287	C	T	C	T	0.00139776	0.513692	0	0	0.00529501	0	0	0.00529501	N	N	N	N	N	N	N	N	N	N	N	N	N	CSQ=T|missense_variant|MODERATE|TMPRSS2|ENSG00000184012|Transcript|ENST00000332149.10|protein_coding|3/14||||354|220|74|G/R|Ggg/Agg|rs114363287||-1||HGNC|HGNC:11876|NM_005656.4|1|P3|tolerated(0.25)|benign(0.031)|0.0014|0.0053|0|0|0|0|0.000442|0.005938|0.0001518|0|0|0|6.23e-05|0|3.374e-05|||||||||neutral(0.038)|8.642|0.653679|0.166,T|missense_variant|MODERATE|TMPRSS2|ENSG00000184012|Transcript|ENS…	N	neutral(0.038)	8.642	0.166	tolerated(0.25)	benign(0.031)
21	41494380	rs200169208	G	A	G	A	0.000199681	0.513692	0	0	0	0.00144092	0	0	N	N	N	N	N	N	N	N	N	N	N	N	N	CSQ=A|missense_variant|MODERATE|TMPRSS2|ENSG00000184012|Transcript|ENST00000332149.10|protein_coding|3/14||||348|214|72|P/S|Cca/Tca|rs200169208||-1||HGNC|HGNC:11876|NM_005656.4|1|P3|tolerated(0.45)|benign(0.003)|0.0002|0|0.0014|0|0|0|4.064e-06|0|3.059e-05|0|0|0|0|0|0|||||||||neutral(0.012)|1.356|-0.047733|0.166,A|missense_variant|MODERATE|TMPRSS2|ENSG00000184012|Transcript|ENST00000398585.7|prote…	N	neutral(0.012)	1.356	0.166	tolerated(0.45)	benign(0.003)
21	41494401	.	C	A	C	A	0.000378072	0.486308	N	N	N	N	N	0.000474158	0	0	0	0	0	0	0.00197628	0	0	0	0	0	0	CSQ=A|missense_variant|MODERATE|TMPRSS2|ENSG00000184012|Transcript|ENST00000332149.10|protein_coding|3/14||||327|193|65|V/F|Gtc/Ttc|rs150389990&COSV59824682||-1||HGNC|HGNC:11876|NM_005656.4|1|P3|tolerated(0.06)|benign(0.435)|||||||||||||||||0&1|0&1||||||neutral(0.465)|13.44|1.140684|0.166,A|missense_variant|MODERATE|TMPRSS2|ENSG00000184012|Transcript|ENST00000398585.7|protein_coding|3/14||||365|3…	N	neutral(0.465)	13.44	0.166	tolerated(0.06)	benign(0.435)
21	41494461	rs201679623	A	C	A	C	0.000998403	0.513692	0.00496032	0	0	0	0	0	N	N	N	N	N	N	N	N	N	N	N	N	N	CSQ=C|missense_variant|MODERATE|TMPRSS2|ENSG00000184012|Transcript|ENST00000332149.10|protein_coding|3/14||||267|133|45|Y/D|Tac/Gac|rs201679623&COSV59823003||-1||HGNC|HGNC:11876|NM_005656.4|1|P3|tolerated(0.06)|possibly_damaging(0.486)|0.0010|0|0|0.005|0|0|0.0005096|0|2.898e-05|0|0.006585|0|0|0|0.0001961||0&1|0&1||||||deleterious(0.484)|23.6|3.224924|0.166,C|missense_variant|MODERATE|TMPRSS2|ENSG…	N	deleterious(0.484)	23.6	0.166	tolerated(0.06)	possibly_damaging(0.486)
21	41494464	rs547639377	A	G	A	G	0.000199681	0.513692	0	0	0	0	0.00102249	0	N	N	N	N	N	N	N	N	N	N	N	N	N	CSQ=G|missense_variant|MODERATE|TMPRSS2|ENSG00000184012|Transcript|ENST00000332149.10|protein_coding|3/14||||264|130|44|Y/H|Tac/Cac|rs547639377||-1||HGNC|HGNC:11876|NM_005656.4|1|P3|tolerated(0.24)|benign(0.017)|0.0002|0|0|0|0|0.001|3.98e-06|0|0|0|0|0|0|0|3.267e-05|||||||||neutral(0.038)|11.06|0.910606|0.166,G|missense_variant|MODERATE|TMPRSS2|ENSG00000184012|Transcript|ENST00000398585.7|protein_…	N	neutral(0.038)	11.06	0.166	tolerated(0.24)	benign(0.017)
21	41494469	rs376143876	G	A	G	A	0.00119808	0.513692	0.00198413	0	0	0	0.00408998	0	N	N	N	N	N	N	N	N	N	N	N	N	N	CSQ=A|missense_variant|MODERATE|TMPRSS2|ENSG00000184012|Transcript|ENST00000332149.10|protein_coding|3/14||||259|125|42|A/V|gCt/gTt|rs376143876||-1||HGNC|HGNC:11876|NM_005656.4|1|P3|tolerated(0.08)|benign(0.017)|0.0012|0|0|0.002|0|0.0041|0.0001552|0|0|0|0.0001632|0|0|0.0001632|0.001144|||||||||neutral(0.300)|13.19|1.107864|0.166,A|missense_variant|MODERATE|TMPRSS2|ENSG00000184012|Transcript|ENST0…	N	neutral(0.300)	13.19	0.166	tolerated(0.08)	benign(0.017)
21	41494472	rs138651919	G	A	G	A	0.000798722	0.513692	0	0.00397614	0	0	0	0	N	N	N	N	N	N	N	N	N	N	N	N	N	CSQ=A|missense_variant|MODERATE|TMPRSS2|ENSG00000184012|Transcript|ENST00000332149.10|protein_coding|3/14||||256|122|41|P/L|cCg/cTg|rs138651919||-1||HGNC|HGNC:11876|NM_005656.4|1|P3|tolerated(0.35)|possibly_damaging(0.685)|0.0008|0|0|0|0.004|0|0.0003383|0.0001847|0.0002028|9.94e-05|0.0001632|0.0001848|0.0005192|0.0009804|6.535e-05|||||||||neutral(0.265)|21.2|2.373541|0.166,A|missense_variant|MODE…	N	neutral(0.265)	21.2	0.166	tolerated(0.35)	possibly_damaging(0.685)
21	41494487	rs141232947	A	G	A	G	0.00184502	0	0	0	0.00075643	0	0	0.0034296	0	0	0	0	0	0	0	0.0291096	0	0.0013624	0	0	0	CSQ=G|missense_variant|MODERATE|TMPRSS2|ENSG00000184012|Transcript|ENST00000332149.10|protein_coding|3/14||||241|107|36|V/A|gTc/gCc|rs141232947||-1||HGNC|HGNC:11876|NM_005656.4|1|P3|tolerated(0.67)|benign(0)|0.0002|0.0008|0|0|0|0|1.592e-05|0.0002462|0|0|0|0|0|0|0|||||||||neutral(0.003)|0.328|-0.270383|0.166,G|missense_variant|MODERATE|TMPRSS2|ENSG00000184012|Transcript|ENST00000398585.7|protein_c…	N	neutral(0.003)	0.328	0.166	tolerated(0.67)	benign(0)
21	41494496	rs201093031	A	G	G	G	0.000599042	0.513692	0.00297619	0	0	0	0	0	N	N	N	N	N	N	N	N	N	N	N	N	N	CSQ=G|missense_variant|MODERATE|TMPRSS2|ENSG00000184012|Transcript|ENST00000332149.10|protein_coding|3/14||||232|98|33|V/A|gTc/gCc|rs201093031||-1||HGNC|HGNC:11876|NM_005656.4|1|P3|tolerated(1)|benign(0)|0.0006|0|0|0.003|0|0|0.000179|0|2.895e-05|0|0.002393|0|0|0|0|||||||||neutral(0.000)|1.442|-0.036635|0.166,G|missense_variant|MODERATE|TMPRSS2|ENSG00000184012|Transcript|ENST00000398585.7|protein_…	N	neutral(0.000)	1.442	0.166	tolerated(1)	benign(0)
21	41494512	rs61735791	C	T	C	T	0.00077685	0	0.000992063	0.00198807	0	0.00288184	0	0.000541516	0	0	0	0	0	0	0.00296443	0	0	0	0	0	0	CSQ=T|missense_variant|MODERATE|TMPRSS2|ENSG00000184012|Transcript|ENST00000332149.10|protein_coding|3/14||||216|82|28|A/T|Gca/Aca|rs61735791&COSV59824252||-1||HGNC|HGNC:11876|NM_005656.4|1|P3|tolerated(0.5)|benign(0.007)|0.0010|0|0.0029|0.001|0.002|0|0.001691|0.0009847|0.0009848|0.0003974|0.001196|0.0001386|0.002797|0.002121|0.0004903||0&1|0&1||||||neutral(0.010)|0.524|-0.203957|0.166,T|missense…	N	neutral(0.010)	0.524	0.166	tolerated(0.5)	benign(0.007)
21	41494515	rs554868303	G	C	G	C	0.000199681	0.513692	0	0	0.00075643	0	0	0.00075643	N	N	N	N	N	N	N	N	N	N	N	N	N	CSQ=C|missense_variant|MODERATE|TMPRSS2|ENSG00000184012|Transcript|ENST00000332149.10|protein_coding|3/14||||213|79|27|P/A|Ccc/Gcc|rs554868303&COSV59821039||-1||HGNC|HGNC:11876|NM_005656.4|1|P3|tolerated(0.11)|benign(0.001)|0.0002|0.0008|0|0|0|0|2.785e-05|0.0001231|0|0|0.0002719|0|0|0|0||0&1|0&1||||||neutral(0.272)|0.145|-0.375538|0.166,C|missense_variant|MODERATE|TMPRSS2|ENSG00000184012|Transcri…	N	neutral(0.272)	0.145	0.166	tolerated(0.11)	benign(0.001)
21	41494541	rs61735790	T	C	T	C	0.0101962	0	0	0.000994036	0.00680787	0.00432277	0	0.0162455	0.03	0.00444444	0	0.015625	0	0.00980392	0.0217391	0.0702055	0.0645161	0.0013624	0	0	0	CSQ=C|missense_variant|MODERATE|TMPRSS2|ENSG00000184012|Transcript|ENST00000332149.10|protein_coding|3/14||||187|53|18|H/R|cAt/cGt|rs61735790||-1||HGNC|HGNC:11876|NM_005656.4|1|P3|tolerated(0.2)|benign(0.015)|0.0026|0.0068|0.0043|0|0.001|0|0.0007336|0.009788|0.0005527|0|5.447e-05|0|1.761e-05|0.0003272|3.281e-05|||||||||neutral(0.050)|15.32|1.434840|0.166,C|missense_variant|MODERATE|TMPRSS2|ENSG00…	N	neutral(0.050)	15.32	0.166	tolerated(0.2)	benign(0.015)
21	41494563	rs371681428	T	G	T	G	0.00094518	0.486308	N	N	N	N	N	0.000711238	0	0	0	0	0	0	0.000988142	0	0.0322581	0	0	0	0	CSQ=G|missense_variant|MODERATE|TMPRSS2|ENSG00000184012|Transcript|ENST00000332149.10|protein_coding|3/14||||165|31|11|I/L|Att/Ctt|rs371681428||-1||HGNC|HGNC:11876|NM_005656.4|1|P3|tolerated_low_confidence(0.21)|benign(0.001)|||||||3.989e-06|0|2.915e-05|0|0|0|0|0|0|||||||||neutral(0.044)|1.598|-0.017550|0.166,G|missense_variant|MODERATE|TMPRSS2|ENSG00000184012|Transcript|ENST00000398585.7|protein…	N	neutral(0.044)	1.598	0.166	tolerated_low_confidence(0.21)	benign(0.001)
21	41498168	rs373389042	T	C	T	C	0.000567108	0.486308	N	N	N	N	N	0.000474158	0	0	0	0	0.0120482	0	0	0	0	0	0	0	0	CSQ=C|5_prime_UTR_variant|MODIFIER|TMPRSS2|ENSG00000184012|Transcript|ENST00000332149.10|protein_coding|2/14||||100|||||rs373389042||-1||HGNC|HGNC:11876|NM_005656.4|1|P3|||||||||7.976e-06|0|2.919e-05|0|0|0|8.802e-06|0|0||||||||||8.255|0.607130|0.166,C|missense_variant|MODERATE|TMPRSS2|ENSG00000184012|Transcript|ENST00000398585.7|protein_coding|2/14||||138|77|26|Y/C|tAc/tGc|rs373389042||-1||HGNC|H…	N	N	8.255	0.166	N	N
21	41498186	.	T	G	T	G	0.000756144	0.486308	N	N	N	N	N	0.000948317	0	0	0	0	0	0	0.00395257	0	0	0	0	0	0	CSQ=G|5_prime_UTR_variant|MODIFIER|TMPRSS2|ENSG00000184012|Transcript|ENST00000332149.10|protein_coding|2/14||||82|||||rs1316902409||-1||HGNC|HGNC:11876|NM_005656.4|1|P3|||||||||||||||||||||||||||10.58|0.864767|0.166,G|missense_variant|MODERATE|TMPRSS2|ENSG00000184012|Transcript|ENST00000398585.7|protein_coding|2/14||||120|59|20|H/P|cAt/cCt|rs1316902409||-1||HGNC|HGNC:11876||2|A2|deleterious_low_…	N	N	10.58	0.166	N	N
21	41507982	rs75603675	C	A	C	A	0.274616	0	0.0168651	0.404573	0.295008	0.272334	0.222904	0.302527	0.323333	0.313333	0.310526	0.390625	0.216867	0.245098	0.307312	0.178082	0.33871	0.321526	0.469595	0.368132	0.328947	CSQ=A|intron_variant|MODIFIER|TMPRSS2|ENSG00000184012|Transcript|ENST00000332149.10|protein_coding||1/13||||||||rs75603675&COSV59827803||-1||HGNC|HGNC:11876|NM_005656.4|1|P3|||0.2438|0.295|0.2723|0.0169|0.4046|0.2229|0.3424|0.3338|0.2753|0.3826|0.01197|0.4188|0.4312|0.3791|0.2688||0&1|0&1|30680235||||||8.046|0.582284|0.166,A|missense_variant|MODERATE|TMPRSS2|ENSG00000184012|Transcript|ENST0000039…	N	N	8.046	0.166	N	N
21	41507983	rs200291871	C	G	C	G	0.00179712	0.513692	0	0.00497018	0	0.00432277	0.00102249	0	N	N	N	N	N	N	N	N	N	N	N	N	N	CSQ=G|intron_variant|MODIFIER|TMPRSS2|ENSG00000184012|Transcript|ENST00000332149.10|protein_coding||1/13||||||||rs200291871&COSV59827230||-1||HGNC|HGNC:11876|NM_005656.4|1|P3|||0.0018|0|0.0043|0|0.005|0.001|0.005424|0.001404|0.003088|0.005772|0|0.001926|0.01099|0.006443|0.0003888||0&1|0&1|||||||9.986|0.805950|0.166,G|missense_variant|MODERATE|TMPRSS2|ENSG00000184012|Transcript|ENST00000398585.7|p…	N	N	9.986	0.166	N	N
