# Supplementary material for: Impact of natural selection on global patterns of genetic variation, and association with clinical phenotypes, at genes involved in SARS-CoV-2 infection
Source: Res Sq. 2021 Jul 27:rs.3.rs-673011. Preprint. [Version 1] doi: 10.21203/rs.3.rs-673011/v1 (PMC8328070; doi:10.21203/rs.3.rs-673011/v1)
Supplement: Supplement 12 [file b4ceff325bb08b8bae0ee398.xlsx]

## Sheet: TopMed_1KG.CD26_extend_enhancer
chrom	position	rsid	ref	alt	ancestor	minor_allele	maf_all	missing_rate	EAS	EUR	AFR	AMR	SAS	AFR_TopMed_1KG	Kenya.Nilo-Saharan	Cameroon.NigerKordofanian	Tanzania.Afroasiatic	Kenya.Afroasiatic	Botswana.Khoesan	Botswana.Niger-Kordofanian	Ethiopia.Afroasiatic	Cameroon.Pygmy	Ethiopia.Niolo-Saharan	Tanzania.Hadzabe	Cameroon.Fulani	Tanzania.Sandawe	Ethiopia.Sabue	info	CLIN_SIG	Condel	CADD_PHRED	LoFtool	SIFT	PolyPhen
2	161993299	rs144519975	C	G	C	G	0.000399361	0.513692	0	0.00198807	0	0	0	0	N	N	N	N	N	N	N	N	N	N	N	N	N	CSQ=G|missense_variant|MODERATE|DPP4|ENSG00000197635|Transcript|ENST00000360534.8|protein_coding|26/26||||2519|2285|762|C/S|tGt/tCt|rs144519975||-1||HGNC|HGNC:3009|NM_001935.4|1|P1|deleterious(0)|probably_damaging(1)|0.0004|0|0|0|0.002|0|0.0004814|0.0003076|8.678e-05|0|0|0.0001386|0.0008799|0.0008146|0.0001633|||||||||0.267|deleterious(0.945)|26.7|4.237089,G|3_prime_UTR_variant&NMD_transcript_var…	N	deleterious(0.945)	26.7	0.267	deleterious(0)	probably_damaging(1)
2	161993302	rs145873093	T	C	T	C	0.000194212	0	0	0	0.00075643	0	0	0.000361011	0.00333333	0	0	0	0	0	0	0	0	0	0	0	0	CSQ=C|missense_variant|MODERATE|DPP4|ENSG00000197635|Transcript|ENST00000360534.8|protein_coding|26/26||||2516|2282|761|Q/R|cAa/cGa|rs145873093||-1||HGNC|HGNC:3009|NM_001935.4|1|P1|tolerated(0.2)|benign(0.019)|0.0002|0.0008|0|0|0|0||||||||||||||||||0.267|neutral(0.050)|23.0|2.893752,C|3_prime_UTR_variant&NMD_transcript_variant|MODIFIER|DPP4|ENSG00000197635|Transcript|ENST00000434918.6|nonsense_me…	N	neutral(0.050)	23	0.267	tolerated(0.2)	benign(0.019)
2	161993359	.	A	C	A	C	0.000189036	0.486308	N	N	N	N	N	0.000237079	0	0	0	0	0	0	0.000988142	0	0	0	0	0	0	CSQ=C|missense_variant|MODERATE|DPP4|ENSG00000197635|Transcript|ENST00000360534.8|protein_coding|26/26||||2459|2225|742|I/R|aTa/aGa|rs750100443||-1||HGNC|HGNC:3009|NM_001935.4|1|P1|deleterious(0)|probably_damaging(0.999)|||||||7.959e-06|0|0|0|0|0|1.76e-05|0|0|||||||||0.267|deleterious(0.935)|28.1|4.449041,C|3_prime_UTR_variant&NMD_transcript_variant|MODIFIER|DPP4|ENSG00000197635|Transcript|ENST00…	N	deleterious(0.935)	28.1	0.267	deleterious(0)	probably_damaging(0.999)
2	161995033	rs370324535	A	T	A	T	0.000399361	0.513692	0.00198413	0	0	0	0	0	N	N	N	N	N	N	N	N	N	N	N	N	N	CSQ=T|missense_variant&splice_region_variant|MODERATE|DPP4|ENSG00000197635|Transcript|ENST00000360534.8|protein_coding|25/26||||2361|2127|709|D/E|gaT/gaA|rs370324535||-1||HGNC|HGNC:3009|NM_001935.4|1|P1|deleterious(0)|probably_damaging(0.984)|0.0004|0|0|0.002|0|0|1.194e-05|0|0|0|0.0001632|0|0|0|0|||||||||0.267|deleterious(0.875)|25.8|4.026849,T|splice_region_variant&3_prime_UTR_variant&NMD_transc…	N	deleterious(0.875)	25.8	0.267	deleterious(0)	probably_damaging(0.984)
2	162005759	rs200487335	G	T	G	T	0.000199681	0.513692	0	0.000994036	0	0	0	0	N	N	N	N	N	N	N	N	N	N	N	N	N	CSQ=T|missense_variant|MODERATE|DPP4|ENSG00000197635|Transcript|ENST00000360534.8|protein_coding|23/26||||2272|2038|680|L/I|Ctt/Att|rs200487335||-1||HGNC|HGNC:3009|NM_001935.4|1|P1|tolerated(0.06)|probably_damaging(0.937)|0.0002|0|0|0|0.001|0|3.986e-06|0|0|0|0|0|8.81e-06|0|0|||||||||0.267|deleterious(0.706)|24.9|3.755436,T|3_prime_UTR_variant&NMD_transcript_variant|MODIFIER|DPP4|ENSG00000197635|T…	N	deleterious(0.706)	24.9	0.267	tolerated(0.06)	probably_damaging(0.937)
2	162005774	rs201306777	T	C	T	C	0.000199681	0.513692	0	0.000994036	0	0	0	0	N	N	N	N	N	N	N	N	N	N	N	N	N	CSQ=C|missense_variant|MODERATE|DPP4|ENSG00000197635|Transcript|ENST00000360534.8|protein_coding|23/26||||2257|2023|675|T/A|Act/Gct|rs201306777||-1||HGNC|HGNC:3009|NM_001935.4|1|P1|tolerated(0.25)|benign(0.238)|0.0002|0|0|0|0.001|0|3.986e-05|0|0|0|0|4.645e-05|7.928e-05|0|0|||||||||0.267|neutral(0.061)|22.1|2.574591,C|3_prime_UTR_variant&NMD_transcript_variant|MODIFIER|DPP4|ENSG00000197635|Transcr…	N	neutral(0.061)	22.1	0.267	tolerated(0.25)	benign(0.238)
2	162005792	rs199925807	G	A	G	A	0.000399361	0.513692	0.000992063	0	0.00075643	0	0	0.00075643	N	N	N	N	N	N	N	N	N	N	N	N	N	CSQ=A|missense_variant|MODERATE|DPP4|ENSG00000197635|Transcript|ENST00000360534.8|protein_coding|23/26||||2239|2005|669|R/C|Cgt/Tgt|rs199925807||-1||HGNC|HGNC:3009|NM_001935.4|1|P1|deleterious(0)|probably_damaging(1)|0.0004|0.0008|0|0.001|0|0|1.595e-05|6.161e-05|0|0|5.439e-05|0|1.763e-05|0|0|||||||||0.267|deleterious(0.945)|34|5.081293,A|3_prime_UTR_variant&NMD_transcript_variant|MODIFIER|DPP4|EN…	N	deleterious(0.945)	34	0.267	deleterious(0)	probably_damaging(1)
2	162008576	rs138430103	C	T	C	T	0.000798722	0.513692	0.00396825	0	0	0	0	0	N	N	N	N	N	N	N	N	N	N	N	N	N	CSQ=T|missense_variant|MODERATE|DPP4|ENSG00000197635|Transcript|ENST00000360534.8|protein_coding|22/26||||2207|1973|658|R/Q|cGg/cAg|rs138430103||-1||HGNC|HGNC:3009|NM_001935.4|1|P1|tolerated(0.08)|benign(0.148)|0.0008|0|0|0.004|0|0|0.0001234|0|0.0001159|0|0.001251|0|0|0.0001631|9.8e-05|||||||||0.267|neutral(0.313)|23.2|3.018425,T|3_prime_UTR_variant&NMD_transcript_variant|MODIFIER|DPP4|ENSG000001…	N	neutral(0.313)	23.2	0.267	tolerated(0.08)	benign(0.148)
2	162008588	rs149643982	G	A	G	A	0.000199681	0.513692	0.000992063	0	0	0	0	0	N	N	N	N	N	N	N	N	N	N	N	N	N	CSQ=A|missense_variant|MODERATE|DPP4|ENSG00000197635|Transcript|ENST00000360534.8|protein_coding|22/26||||2195|1961|654|A/V|gCg/gTg|rs149643982&COSV62106254||-1||HGNC|HGNC:3009|NM_001935.4|1|P1|deleterious(0)|probably_damaging(0.999)|0.0002|0|0|0.001|0|0|6.766e-05|6.156e-05|8.691e-05|0|0.0002719|0|4.4e-05|0.000163|6.533e-05||0&1|0&1||||||0.267|deleterious(0.935)|32|4.713743,A|3_prime_UTR_variant&…	N	deleterious(0.935)	32	0.267	deleterious(0)	probably_damaging(0.999)
2	162008646	rs200430209	C	T	C	T	0.00077685	0	0	0	0.00075643	0	0	0.00126354	0	0.0133333	0	0	0	0	0	0	0	0	0	0	0	CSQ=T|missense_variant|MODERATE|DPP4|ENSG00000197635|Transcript|ENST00000360534.8|protein_coding|22/26||||2137|1903|635|V/I|Gta/Ata|rs200430209&COSV62110711||-1||HGNC|HGNC:3009|NM_001935.4|1|P1|deleterious(0.03)|possibly_damaging(0.709)|0.0002|0.0008|0|0|0|0|8.361e-05|0.0009851|2.898e-05|0|0|0|2.641e-05|0.000163|0||0&1|0&1||||||0.267|deleterious(0.621)|26.4|4.156932,T|3_prime_UTR_variant&NMD_tran…	N	deleterious(0.621)	26.4	0.267	deleterious(0.03)	possibly_damaging(0.709)
2	162009260	rs147614497	C	T	C	T	0.000199681	0.513692	0	0	0	0.00144092	0	0	N	N	N	N	N	N	N	N	N	N	N	N	N	CSQ=T|missense_variant|MODERATE|DPP4|ENSG00000197635|Transcript|ENST00000360534.8|protein_coding|21/26||||2102|1868|623|R/Q|cGa/cAa|rs147614497&COSV62104993||-1||HGNC|HGNC:3009|NM_001935.4|1|P1|deleterious(0)|possibly_damaging(0.662)|0.0002|0|0.0014|0|0|0|2.388e-05|6.155e-05|2.896e-05|0|5.438e-05|0|8.801e-06|0.0001632|3.267e-05||0&1|0&1||||||0.267|deleterious(0.678)|25.6|3.975808,T|3_prime_UTR_va…	N	deleterious(0.678)	25.6	0.267	deleterious(0)	possibly_damaging(0.662)
2	162011868	rs577060626	T	C	T	C	0.000199681	0.513692	0.000992063	0	0	0	0	0	N	N	N	N	N	N	N	N	N	N	N	N	N	CSQ=C|missense_variant|MODERATE|DPP4|ENSG00000197635|Transcript|ENST00000360534.8|protein_coding|20/26||||1991|1757|586|Q/R|cAa/cGa|rs577060626||-1||HGNC|HGNC:3009|NM_001935.4|1|P1|deleterious(0.05)|probably_damaging(0.953)|0.0002|0|0|0.001|0|0|3.979e-06|0|0|0|5.437e-05|0|0|0|0|||||||||0.267|deleterious(0.742)|27.3|4.338723,C|3_prime_UTR_variant&NMD_transcript_variant|MODIFIER|DPP4|ENSG0000019763…	N	deleterious(0.742)	27.3	0.267	deleterious(0.05)	probably_damaging(0.953)
2	162014451	rs200348396	T	C	T	C	0.00094518	0.486308	N	N	N	N	N	0.0011854	0	0	0	0	0	0	0.00494071	0	0	0	0	0	0	CSQ=C|missense_variant|MODERATE|DPP4|ENSG00000197635|Transcript|ENST00000360534.8|protein_coding|19/26||||1816|1582|528|M/V|Atg/Gtg|rs200348396||-1||HGNC|HGNC:3009|NM_001935.4|1|P1|deleterious(0)|possibly_damaging(0.527)|||||||0.00013|0|9.088e-05|0.001602|0|0|7.124e-05|0.0008389|0|||||||||0.267|deleterious(0.623)|25.1|3.817194,C|3_prime_UTR_variant&NMD_transcript_variant|MODIFIER|DPP4|ENSG0000019…	N	deleterious(0.623)	25.1	0.267	deleterious(0)	possibly_damaging(0.527)
2	162016768	rs200675520	T	C	T	C	0.000199681	0.513692	0	0	0.00075643	0	0	0.00075643	N	N	N	N	N	N	N	N	N	N	N	N	N	CSQ=C|missense_variant&splice_region_variant|MODERATE|DPP4|ENSG00000197635|Transcript|ENST00000360534.8|protein_coding|18/26||||1801|1567|523|K/E|Aaa/Gaa|rs200675520||-1||HGNC|HGNC:3009|NM_001935.4|1|P1|tolerated(0.79)|benign(0)|0.0002|0.0008|0|0|0|0|4.031e-06|6.194e-05|0|0|0|0|0|0|0|||||||||0.267|neutral(0.001)|20.5|2.256716,C|splice_region_variant&3_prime_UTR_variant&NMD_transcript_variant|LOW|…	N	neutral(0.001)	20.5	0.267	tolerated(0.79)	benign(0)
2	162016811	.	C	A	C	A	0.000189036	0.486308	N	N	N	N	N	0.000237079	0	0	0	0	0.0060241	0	0	0	0	0	0	0	0	CSQ=A|missense_variant|MODERATE|DPP4|ENSG00000197635|Transcript|ENST00000360534.8|protein_coding|18/26||||1758|1524|508|Q/H|caG/caT|||-1||HGNC|HGNC:3009|NM_001935.4|1|P1|tolerated(0.05)|benign(0.078)||||||||||||||||||||||||0.267|neutral(0.351)|19.07|2.053335,A|3_prime_UTR_variant&NMD_transcript_variant|MODIFIER|DPP4|ENSG00000197635|Transcript|ENST00000434918.6|nonsense_mediated_decay|19/27||||189…	N	neutral(0.351)	19.07	0.267	tolerated(0.05)	benign(0.078)
2	162017113	.	T	G	T	G	0.000756144	0.486308	N	N	N	N	N	0.000711238	0.00333333	0	0	0.015625	0	0	0.000988142	0	0	0	0	0	0	CSQ=G|missense_variant|MODERATE|DPP4|ENSG00000197635|Transcript|ENST00000360534.8|protein_coding|17/26||||1697|1463|488|D/A|gAt/gCt|||-1||HGNC|HGNC:3009|NM_001935.4|1|P1|tolerated(0.11)|benign(0.098)||||||||||||||||||||||||0.267|neutral(0.279)|16.82|1.691320,G|3_prime_UTR_variant&NMD_transcript_variant|MODIFIER|DPP4|ENSG00000197635|Transcript|ENST00000434918.6|nonsense_mediated_decay|18/27||||183…	N	neutral(0.279)	16.82	0.267	tolerated(0.11)	benign(0.098)
2	162017155	.	C	A	C	A	0.000189036	0.486308	N	N	N	N	N	0.000237079	0	0	0	0	0	0	0.000988142	0	0	0	0	0	0	CSQ=A|missense_variant&splice_region_variant|MODERATE|DPP4|ENSG00000197635|Transcript|ENST00000360534.8|protein_coding|17/26||||1655|1421|474|G/V|gGt/gTt|COSV62109150||-1||HGNC|HGNC:3009|NM_001935.4|1|P1|deleterious(0)|probably_damaging(1)|||||||||||||||||1|1||||||0.267|deleterious(0.945)|32|4.750422,A|splice_region_variant&3_prime_UTR_variant&NMD_transcript_variant|LOW|DPP4|ENSG00000197635|Trans…	N	deleterious(0.945)	32	0.267	deleterious(0)	probably_damaging(1)
2	162018762	.	T	C	T	C	0.000189036	0.486308	N	N	N	N	N	0.000237079	0.00333333	0	0	0	0	0	0	0	0	0	0	0	0	CSQ=C|missense_variant|MODERATE|DPP4|ENSG00000197635|Transcript|ENST00000360534.8|protein_coding|16/26||||1621|1387|463|K/E|Aaa/Gaa|||-1||HGNC|HGNC:3009|NM_001935.4|1|P1|tolerated(0.62)|benign(0.001)||||||||||||||||||||||||0.267|neutral(0.004)|11.75|0.968538,C|3_prime_UTR_variant&NMD_transcript_variant|MODIFIER|DPP4|ENSG00000197635|Transcript|ENST00000434918.6|nonsense_mediated_decay|17/27||||176…	N	neutral(0.004)	11.75	0.267	tolerated(0.62)	benign(0.001)
2	162018774	.	C	A	C	A	0.000189036	0.486308	N	N	N	N	N	0.000237079	0	0	0	0	0	0	0.000988142	0	0	0	0	0	0	CSQ=A|missense_variant|MODERATE|DPP4|ENSG00000197635|Transcript|ENST00000360534.8|protein_coding|16/26||||1609|1375|459|V/L|Gtg/Ttg|||-1||HGNC|HGNC:3009|NM_001935.4|1|P1|deleterious(0.01)|benign(0.054)||||||||||||||||||||||||0.267|neutral(0.409)|23.5|3.142652,A|3_prime_UTR_variant&NMD_transcript_variant|MODIFIER|DPP4|ENSG00000197635|Transcript|ENST00000434918.6|nonsense_mediated_decay|17/27||||17…	N	neutral(0.409)	23.5	0.267	deleterious(0.01)	benign(0.054)
2	162018839	rs1129599	C	G	C	G	0.0120412	0	0	0	0.0363086	0.00288184	0	0.01787	0.00666667	0.0177778	0	0	0.0060241	0.0392157	0.000988142	0.0119863	0	0.00544959	0.0810811	0	0	CSQ=G|missense_variant|MODERATE|DPP4|ENSG00000197635|Transcript|ENST00000360534.8|protein_coding|16/26||||1544|1310|437|S/T|aGt/aCt|rs1129599||-1||HGNC|HGNC:3009|NM_001935.4|1|P1|tolerated(0.29)|benign(0)|0.0100|0.0363|0.0029|0|0|0|0.002591|0.03587|0.001507|0|0|0|7.035e-05|0.0009775|6.546e-05|||||||||0.267|neutral(0.029)|3.725|0.174075,G|3_prime_UTR_variant&NMD_transcript_variant|MODIFIER|DPP4|EN…	N	neutral(0.029)	3.725	0.267	tolerated(0.29)	benign(0)
2	162019269	.	T	C	T	C	0.000378072	0.486308	N	N	N	N	N	0.000237079	0	0	0	0	0	0	0	0	0	0	0	0.00549451	0	CSQ=C|missense_variant|MODERATE|DPP4|ENSG00000197635|Transcript|ENST00000360534.8|protein_coding|15/26||||1486|1252|418|I/V|Att/Gtt|rs1369653561||-1||HGNC|HGNC:3009|NM_001935.4|1|P1|tolerated(0.51)|benign(0.015)||||||||||||||||||||||||0.267|neutral(0.009)|15.78|1.513756,C|3_prime_UTR_variant&NMD_transcript_variant|MODIFIER|DPP4|ENSG00000197635|Transcript|ENST00000434918.6|nonsense_mediated_decay|…	N	neutral(0.009)	15.78	0.267	tolerated(0.51)	benign(0.015)
2	162019271	rs377513691	T	C	T	C	0.00321361	0.486308	N	N	N	N	N	0.00260787	0.0166667	0	0	0	0	0	0.00494071	0	0.016129	0	0	0	0	CSQ=C|missense_variant|MODERATE|DPP4|ENSG00000197635|Transcript|ENST00000360534.8|protein_coding|15/26||||1484|1250|417|Y/C|tAc/tGc|rs377513691||-1||HGNC|HGNC:3009|NM_001935.4|1|P1|deleterious(0)|probably_damaging(0.993)|||||||1.663e-05|0.0001946|0|0|0|0|9.01e-06|0|0|||||||||0.267|deleterious(0.895)|24.0|3.409140,C|3_prime_UTR_variant&NMD_transcript_variant|MODIFIER|DPP4|ENSG00000197635|Transcrip…	N	deleterious(0.895)	24	0.267	deleterious(0)	probably_damaging(0.993)
2	162020257	.	C	G	C	G	0.000189036	0.486308	N	N	N	N	N	0	0	0	0	0	0	0	0	0	0	0	0	0	0	CSQ=G|missense_variant|MODERATE|DPP4|ENSG00000197635|Transcript|ENST00000360534.8|protein_coding|14/26||||1450|1216|406|G/R|Ggg/Cgg|||-1||HGNC|HGNC:3009|NM_001935.4|1|P1|tolerated(0.53)|benign(0.101)||||||||||||||||||||||||0.267|neutral(0.015)|12.83|1.065650,G|3_prime_UTR_variant&NMD_transcript_variant|MODIFIER|DPP4|ENSG00000197635|Transcript|ENST00000434918.6|nonsense_mediated_decay|15/27||||158…	N	neutral(0.015)	12.83	0.267	tolerated(0.53)	benign(0.101)
2	162022771	rs200857741	G	A	G	A	0.00077685	0	0	0	0	0	0.00715746	0.000180505	0	0	0	0	0	0	0.000988142	0	0	0	0	0	0	CSQ=A|missense_variant|MODERATE|DPP4|ENSG00000197635|Transcript|ENST00000360534.8|protein_coding|12/26||||1286|1052|351|T/I|aCt/aTt|rs200857741||-1||HGNC|HGNC:3009|NM_001935.4|1|P1|deleterious(0.02)|probably_damaging(0.945)|0.0014|0|0|0|0|0.0072|0.0002586|0|0|0|0|0|0|0|0.002123|||||||||0.267|deleterious(0.772)|24.8|3.713032,A|3_prime_UTR_variant&NMD_transcript_variant|MODIFIER|DPP4|ENSG0000019763…	N	deleterious(0.772)	24.8	0.267	deleterious(0.02)	probably_damaging(0.945)
2	162022777	rs191729700	C	T	C	T	0.000199681	0.513692	0	0	0.00075643	0	0	0.00075643	N	N	N	N	N	N	N	N	N	N	N	N	N	CSQ=T|missense_variant|MODERATE|DPP4|ENSG00000197635|Transcript|ENST00000360534.8|protein_coding|12/26||||1280|1046|349|S/N|aGt/aAt|rs191729700&COSV62105062||-1||HGNC|HGNC:3009|NM_001935.4|1|P1|deleterious(0.02)|benign(0.311)|0.0002|0.0008|0|0|0|0|3.978e-06|6.152e-05|0|0|0|0|0|0|0||0&1|0&1||||||0.267|deleterious(0.480)|21.1|2.345994,T|3_prime_UTR_variant&NMD_transcript_variant|MODIFIER|DPP4|ENSG0…	N	deleterious(0.480)	21.1	0.267	deleterious(0.02)	benign(0.311)
2	162022778	rs201668230	T	A	T	A	0.000189036	0.486308	N	N	N	N	N	0	0	0	0	0	0	0	0	0	0	0	0	0	0	CSQ=A|missense_variant|MODERATE|DPP4|ENSG00000197635|Transcript|ENST00000360534.8|protein_coding|12/26||||1279|1045|349|S/C|Agt/Tgt|rs201668230||-1||HGNC|HGNC:3009|NM_001935.4|1|P1|deleterious(0)|probably_damaging(0.992)|||||||7.955e-06|6.152e-05|2.891e-05|0|0|0|0|0|0|||||||||0.267|deleterious(0.892)|24.2|3.478142,A|3_prime_UTR_variant&NMD_transcript_variant|MODIFIER|DPP4|ENSG00000197635|Transcri…	N	deleterious(0.892)	24.2	0.267	deleterious(0)	probably_damaging(0.992)
2	162024839	.	A	T	A	T	0.000567108	0.486308	N	N	N	N	N	0.000711238	0	0	0.0105263	0	0	0	0.000988142	0	0	0	0	0	0	CSQ=T|missense_variant|MODERATE|DPP4|ENSG00000197635|Transcript|ENST00000360534.8|protein_coding|11/26||||1222|988|330|Y/N|Tat/Aat|rs1224095152||-1||HGNC|HGNC:3009|NM_001935.4|1|P1|deleterious(0.01)|benign(0.251)|||||||3.981e-06|6.153e-05|0|0|0|0|0|0|0|||||||||0.267|neutral(0.431)|24.4|3.546767,T|3_prime_UTR_variant&NMD_transcript_variant|MODIFIER|DPP4|ENSG00000197635|Transcript|ENST00000434918.6…	N	neutral(0.431)	24.4	0.267	deleterious(0.01)	benign(0.251)
2	162024916	.	G	A	G	A	0.000189036	0.486308	N	N	N	N	N	0.000237079	0.00333333	0	0	0	0	0	0	0	0	0	0	0	0	CSQ=A|missense_variant|MODERATE|DPP4|ENSG00000197635|Transcript|ENST00000360534.8|protein_coding|11/26||||1145|911|304|T/I|aCa/aTa|rs1370626715||-1||HGNC|HGNC:3009|NM_001935.4|1|P1|tolerated(0.07)|possibly_damaging(0.886)|||||||3.989e-06|0|0|0|0|0|0|0|3.267e-05|||||||||0.267|deleterious(0.665)|23.9|3.367691,A|3_prime_UTR_variant&NMD_transcript_variant|MODIFIER|DPP4|ENSG00000197635|Transcript|ENST…	N	deleterious(0.665)	23.9	0.267	tolerated(0.07)	possibly_damaging(0.886)
2	162033556	rs539922436	G	A	G	A	0.000199681	0.513692	0.000992063	0	0	0	0	0	N	N	N	N	N	N	N	N	N	N	N	N	N	CSQ=A|missense_variant|MODERATE|DPP4|ENSG00000197635|Transcript|ENST00000360534.8|protein_coding|10/26||||1106|872|291|A/V|gCt/gTt|rs539922436||-1||HGNC|HGNC:3009|NM_001935.4|1|P1|tolerated(0.08)|benign(0.125)|0.0002|0|0|0.001|0|0|3.996e-06|0|0|0|5.473e-05|0|0|0|0|||||||||0.267|neutral(0.310)|14.27|1.262470,A|downstream_gene_variant|MODIFIER|DPP4|ENSG00000197635|Transcript|ENST00000416189.5|nonse…	N	neutral(0.310)	14.27	0.267	tolerated(0.08)	benign(0.125)
2	162033598	rs56270378	C	G	C	G	0.000199681	0.513692	0	0.000994036	0	0	0	0	N	N	N	N	N	N	N	N	N	N	N	N	N	CSQ=G|missense_variant|MODERATE|DPP4|ENSG00000197635|Transcript|ENST00000360534.8|protein_coding|10/26||||1064|830|277|S/T|aGc/aCc|rs56270378||-1||HGNC|HGNC:3009|NM_001935.4|1|P1|tolerated(0.65)|benign(0.013)|0.0002|0|0|0|0.001|0|1.197e-05|0|0|0|0|0|2.648e-05|0|0|||||||||0.267|neutral(0.004)|4.962|0.271456,G|downstream_gene_variant|MODIFIER|DPP4|ENSG00000197635|Transcript|ENST00000416189.5|nonsen…	N	neutral(0.004)	4.962	0.267	tolerated(0.65)	benign(0.013)
2	162033632	rs56179129	C	T	C	T	0.00239617	0.513692	0	0.00894632	0	0.00432277	0	0	N	N	N	N	N	N	N	N	N	N	N	N	N	CSQ=T|missense_variant|MODERATE|DPP4|ENSG00000197635|Transcript|ENST00000360534.8|protein_coding|10/26||||1030|796|266|V/I|Gta/Ata|rs56179129||-1||HGNC|HGNC:3009|NM_001935.4|1|P1|tolerated(0.14)|benign(0.148)|0.0024|0|0.0043|0|0.0089|0|0.003309|0.001182|0.003961|0.0005006|5.573e-05|0.0001396|0.005526|0.005165|0.0002001|||||||||0.267|neutral(0.263)|19.92|2.178962,T|downstream_gene_variant|MODIFIER…	N	neutral(0.263)	19.92	0.267	tolerated(0.14)	benign(0.148)
2	162035172	.	A	G	A	G	0.000189036	0.486308	N	N	N	N	N	0	0	0	0	0	0	0	0	0	0	0	0	0	0	CSQ=G|missense_variant|MODERATE|DPP4|ENSG00000197635|Transcript|ENST00000360534.8|protein_coding|9/26||||1000|766|256|Y/H|Tat/Cat|rs767238727||-1||HGNC|HGNC:3009|NM_001935.4|1|P1|deleterious(0)|probably_damaging(0.999)|||||||4.006e-06|6.16e-05|0|0|0|0|0|0|0|||||||||0.267|deleterious(0.935)|29.7|4.624535,G|downstream_gene_variant|MODIFIER|DPP4|ENSG00000197635|Transcript|ENST00000413651.3|nonsense_…	N	deleterious(0.935)	29.7	0.267	deleterious(0)	probably_damaging(0.999)
2	162035181	rs182689048	G	A	G	A	0.000199681	0.513692	0	0.000994036	0	0	0	0	N	N	N	N	N	N	N	N	N	N	N	N	N	CSQ=A|missense_variant|MODERATE|DPP4|ENSG00000197635|Transcript|ENST00000360534.8|protein_coding|9/26||||991|757|253|R/W|Cgg/Tgg|rs182689048||-1||HGNC|HGNC:3009|NM_001935.4|1|P1|tolerated(0.1)|benign(0.022)|0.0002|0|0|0|0.001|0|1.995e-05|0|0|0|0|0|4.414e-05|0|0|||||||||0.267|neutral(0.287)|15.57|1.477166,A|downstream_gene_variant|MODIFIER|DPP4|ENSG00000197635|Transcript|ENST00000413651.3|nonsense…	N	neutral(0.287)	15.57	0.267	tolerated(0.1)	benign(0.022)
2	162035197	rs577626040	C	A	C	A	0.000199681	0.513692	0	0	0	0	0.00102249	0	N	N	N	N	N	N	N	N	N	N	N	N	N	CSQ=A|missense_variant|MODERATE|DPP4|ENSG00000197635|Transcript|ENST00000360534.8|protein_coding|9/26||||975|741|247|Q/H|caG/caT|rs577626040||-1||HGNC|HGNC:3009|NM_001935.4|1|P1|deleterious(0)|probably_damaging(0.988)|0.0002|0|0|0|0|0.001|3.185e-05|0|0|0|0|0|0|0|0.0002614|||||||||0.267|deleterious(0.882)|24.7|3.672759,A|downstream_gene_variant|MODIFIER|DPP4|ENSG00000197635|Transcript|ENST00000413…	N	deleterious(0.882)	24.7	0.267	deleterious(0)	probably_damaging(0.988)
2	162035238	rs140092320	G	C	G	C	0.000199681	0.513692	0	0	0.00075643	0	0	0.00075643	N	N	N	N	N	N	N	N	N	N	N	N	N	CSQ=C|missense_variant|MODERATE|DPP4|ENSG00000197635|Transcript|ENST00000360534.8|protein_coding|9/26||||934|700|234|P/A|Cca/Gca|rs140092320||-1||HGNC|HGNC:3009|NM_001935.4|1|P1|deleterious(0.02)|benign(0.288)|0.0002|0.0008|0|0|0|0|2.785e-05|0.0004307|0|0|0|0|0|0|0|||||||||0.267|deleterious(0.472)|23.8|3.282779,C|downstream_gene_variant|MODIFIER|DPP4|ENSG00000197635|Transcript|ENST00000413651.3|n…	N	deleterious(0.472)	23.8	0.267	deleterious(0.02)	benign(0.288)
2	162035306	rs200357193	T	C	T	C	0.000378072	0.486308	N	N	N	N	N	0.000474158	0	0	0	0	0	0.0196078	0	0	0	0	0	0	0	CSQ=C|missense_variant|MODERATE|DPP4|ENSG00000197635|Transcript|ENST00000360534.8|protein_coding|9/26||||866|632|211|Y/C|tAc/tGc|rs200357193&COSV62105210||-1||HGNC|HGNC:3009|NM_001935.4|1|P1|deleterious(0.03)|probably_damaging(0.948)|||||||1.6e-05|0.0002464|0|0|0|0|0|0|0||0&1|0&1||||||0.267|deleterious(0.756)|32|4.737357,C|downstream_gene_variant|MODIFIER|DPP4|ENSG00000197635|Transcript|ENST00000…	N	deleterious(0.756)	32	0.267	deleterious(0.03)	probably_damaging(0.948)
2	162038352	rs147146003	G	A	G	A	0.000189036	0.486308	N	N	N	N	N	0.000237079	0	0	0	0.015625	0	0	0	0	0	0	0	0	0	CSQ=A|missense_variant|MODERATE|DPP4|ENSG00000197635|Transcript|ENST00000360534.8|protein_coding|8/26||||797|563|188|T/M|aCg/aTg|rs147146003&COSV62106990||-1||HGNC|HGNC:3009|NM_001935.4|1|P1|deleterious(0)|possibly_damaging(0.838)|||||||3.241e-05|0.0001886|0|0|0|0|4.47e-05|0|0||0&1|0&1||||||0.267|deleterious(0.764)|15.44|1.455830,A|downstream_gene_variant|MODIFIER|DPP4|ENSG00000197635|Transcript|…	N	deleterious(0.764)	15.44	0.267	deleterious(0)	possibly_damaging(0.838)
2	162038408	rs149291595	G	A	G	A	0.00417557	0	0	0	0.00075643	0	0	0.00649819	0.0133333	0.00444444	0	0	0	0	0.000988142	0.0359589	0	0.00408719	0	0.021978	0	CSQ=A|synonymous_variant|LOW|DPP4|ENSG00000197635|Transcript|ENST00000360534.8|protein_coding|8/26||||741|507|169|N|aaC/aaT|rs149291595||-1||HGNC|HGNC:3009|NM_001935.4|1|P1|||0.0002|0.0008|0|0|0|0|0.0002112|0.002835|0.0001859|0|0|0|0|0|0|||||||||0.267||9.696|0.775953,A|downstream_gene_variant|MODIFIER|DPP4|ENSG00000197635|Transcript|ENST00000413651.3|nonsense_mediated_decay||||||||||rs149291595|5…	N	N	9.696	0.267	N	N
2	162045537	rs144186033	C	T	C	T	0.000199681	0.513692	0.000992063	0	0	0	0	0	N	N	N	N	N	N	N	N	N	N	N	N	N	CSQ=T|missense_variant|MODERATE|DPP4|ENSG00000197635|Transcript|ENST00000360534.8|protein_coding|5/26||||595|361|121|V/M|Gtg/Atg|rs144186033&COSV62109371||-1||HGNC|HGNC:3009|NM_001935.4|1|P1|deleterious(0.03)|benign(0.012)|0.0002|0|0|0.001|0|0|2.795e-05|6.187e-05|2.91e-05|0|0.0001088|0|2.65e-05|0|0||0&1|0&1||||||0.267|neutral(0.365)|18.15|1.913458,T|3_prime_UTR_variant&NMD_transcript_variant|MODI…	N	neutral(0.365)	18.15	0.267	deleterious(0.03)	benign(0.012)
2	162045547	rs145810986	T	G	T	G	0.000388425	0	0	0	0.00151286	0	0	0.000722022	0	0	0	0	0	0	0	0	0	0	0.00675676	0	0	CSQ=G|missense_variant|MODERATE|DPP4|ENSG00000197635|Transcript|ENST00000360534.8|protein_coding|5/26||||585|351|117|E/D|gaA/gaC|rs145810986||-1||HGNC|HGNC:3009|NM_001935.4|1|P1|tolerated(0.11)|possibly_damaging(0.537)|0.0004|0.0015|0|0|0|0|4.388e-05|0.0006186|0|0|0|0|0|0.000164|0|||||||||0.267|neutral(0.453)|22.2|2.590636,G|3_prime_UTR_variant&NMD_transcript_variant|MODIFIER|DPP4|ENSG00000197635…	N	neutral(0.453)	22.2	0.267	tolerated(0.11)	possibly_damaging(0.537)
2	162045579	.	T	C	T	C	0.000567108	0.486308	N	N	N	N	N	0.000711238	0	0	0	0.015625	0	0	0.00197628	0	0	0	0	0	0	CSQ=C|missense_variant|MODERATE|DPP4|ENSG00000197635|Transcript|ENST00000360534.8|protein_coding|5/26||||553|319|107|I/V|Ata/Gta|COSV62105855||-1||HGNC|HGNC:3009|NM_001935.4|1|P1|tolerated(0.5)|benign(0)|||||||||||||||||1|1||||||0.267|neutral(0.010)|4.632|0.244618,C|3_prime_UTR_variant&NMD_transcript_variant|MODIFIER|DPP4|ENSG00000197635|Transcript|ENST00000413651.3|nonsense_mediated_decay|6/8|||…	N	neutral(0.010)	4.632	0.267	tolerated(0.5)	benign(0)
2	162046765	.	G	A	G	A	0.000194212	0	0	0	0.00075643	0	0	0.000361011	0	0	0	0	0	0	0	0	0	0	0.00337838	0	0	CSQ=A|intron_variant|MODIFIER|DPP4|ENSG00000197635|Transcript|ENST00000360534.8|protein_coding||4/25||||||||rs556532178||-1||HGNC|HGNC:3009|NM_001935.4|1|P1|||0.0002|0.0008|0|0|0|0|1.308e-05|0.0002501|0|0|0|0|0|0|0|||||||||0.267||18.16|1.915747,A|missense_variant&NMD_transcript_variant|MODERATE|DPP4|ENSG00000197635|Transcript|ENST00000413651.3|nonsense_mediated_decay|5/8||||347|326|109|S/F|tCc/tT…	N	N	18.16	0.267	N	N
2	162046802	rs545467143	T	C	T	C	0.00439297	0.513692	0	0	0	0	0.0224949	0	N	N	N	N	N	N	N	N	N	N	N	N	N	CSQ=C|intron_variant|MODIFIER|DPP4|ENSG00000197635|Transcript|ENST00000360534.8|protein_coding||4/25||||||||rs545467143||-1||HGNC|HGNC:3009|NM_001935.4|1|P1|||0.0044|0|0|0|0|0.0225|0.002374|0|0|0.0001145|0.000157|0|0|0.0002143|0.01666|||||||||0.267||18.86|2.022258,C|missense_variant&NMD_transcript_variant|MODERATE|DPP4|ENSG00000197635|Transcript|ENST00000413651.3|nonsense_mediated_decay|5/8||||31…	N	N	18.86	0.267	N	N
2	162046922	rs544381314	C	T	C	T	0.000199681	0.513692	0	0	0	0	0.00102249	0	N	N	N	N	N	N	N	N	N	N	N	N	N	CSQ=T|missense_variant|MODERATE|DPP4|ENSG00000197635|Transcript|ENST00000360534.8|protein_coding|4/26||||512|278|93|S/N|aGt/aAt|rs544381314||-1||HGNC|HGNC:3009|NM_001935.4|1|P1|tolerated(0.12)|benign(0)|0.0002|0|0|0|0|0.001|0.0001838|0|0|0|0|0|0|0|0.001509|||||||||0.267|neutral(0.261)|15.46|1.459026,T|missense_variant&NMD_transcript_variant|MODERATE|DPP4|ENSG00000197635|Transcript|ENST00000413651…	N	neutral(0.261)	15.46	0.267	tolerated(0.12)	benign(0)
2	162047005	rs200443496	A	T	A	T	0.000399361	0.513692	0	0	0	0	0.00204499	0	N	N	N	N	N	N	N	N	N	N	N	N	N	CSQ=T|missense_variant&splice_region_variant|MODERATE|DPP4|ENSG00000197635|Transcript|ENST00000360534.8|protein_coding|4/26||||429|195|65|D/E|gaT/gaA|rs200443496||-1||HGNC|HGNC:3009|NM_001935.4|1|P1|tolerated(0.19)|benign(0)|0.0004|0|0|0|0|0.002|0.0005536|0|0.0009746|0|0|0|3.698e-05|0.0005312|0.003513|||||||||0.267|neutral(0.050)|16.96|1.715598,T|missense_variant&splice_region_variant&NMD_transcr…	N	neutral(0.050)	16.96	0.267	tolerated(0.19)	benign(0)
2	162047444	rs201575795	T	C	T	C	0.000199681	0.513692	0	0	0.00075643	0	0	0.00075643	N	N	N	N	N	N	N	N	N	N	N	N	N	CSQ=C|missense_variant|MODERATE|DPP4|ENSG00000197635|Transcript|ENST00000360534.8|protein_coding|3/26||||386|152|51|N/S|aAt/aGt|rs201575795||-1||HGNC|HGNC:3009|NM_001935.4|1|P1|tolerated(0.58)|benign(0)|0.0002|0.0008|0|0|0|0|1.603e-05|0.0002468|0|0|0|0|0|0|0|||||||||0.267|neutral(0.005)|14.07|1.232353,C|missense_variant&NMD_transcript_variant|MODERATE|DPP4|ENSG00000197635|Transcript|ENST000004136…	N	neutral(0.005)	14.07	0.267	tolerated(0.58)	benign(0)
2	162047477	rs201004732	C	T	C	T	0.000399361	0.513692	0	0.00198807	0	0	0	0	N	N	N	N	N	N	N	N	N	N	N	N	N	CSQ=T|missense_variant|MODERATE|DPP4|ENSG00000197635|Transcript|ENST00000360534.8|protein_coding|3/26||||353|119|40|R/H|cGc/cAc|rs201004732&COSV62106547||-1||HGNC|HGNC:3009|NM_001935.4|1|P1|deleterious(0.02)|benign(0.006)|0.0004|0|0|0|0.002|0|0.0001129|0|2.925e-05|0|5.469e-05|0.0002994|0.0001684|0|3.289e-05||0&1|0&1||||||0.267|neutral(0.383)|22.3|2.623446,T|missense_variant&NMD_transcript_variant…	N	neutral(0.383)	22.3	0.267	deleterious(0.02)	benign(0.006)
2	162073428	.	G	A	G	A	0.000567108	0.486308	N	N	N	N	N	0.000711238	0.00333333	0	0	0	0	0	0	0	0	0	0	0.010989	0	CSQ=A|missense_variant|MODERATE|DPP4|ENSG00000197635|Transcript|ENST00000360534.8|protein_coding|2/26||||299|65|22|T/I|aCc/aTc|rs775450106||-1||HGNC|HGNC:3009|NM_001935.4|1|P1|tolerated(0.08)|probably_damaging(0.981)|||||||1.193e-05|0|0|0|0.0001631|0|0|0|0|||||||||0.267|deleterious(0.726)|24.5|3.588304,A|missense_variant&NMD_transcript_variant|MODERATE|DPP4|ENSG00000197635|Transcript|ENST00000413…	N	deleterious(0.726)	24.5	0.267	tolerated(0.08)	probably_damaging(0.981)
