# Supplementary material for: Impact of natural selection on global patterns of genetic variation, and association with clinical phenotypes, at genes involved in SARS-CoV-2 infection
Source: Res Sq. 2021 Jul 27:rs.3.rs-673011. Preprint. [Version 1] doi: 10.21203/rs.3.rs-673011/v1 (PMC8328070; doi:10.21203/rs.3.rs-673011/v1)
Supplement: Supplement 13 [file cc8c4adfaad446fda6faa5c1.xlsx]

## Sheet: TopMed_1KG.LY6E_extend_enhancer
chrom	position	rsid	ref	alt	ancestor	minor_allele	maf_all	EAS	EUR	AFR	AMR	SAS	AFR_TopMed_1KG	Kenya.Nilo-Saharan	Cameroon.NigerKordofanian	Tanzania.Afroasiatic	Kenya.Afroasiatic	Botswana.Khoesan	Botswana.Niger-Kordofanian	Ethiopia.Afroasiatic	Cameroon.Pygmy	Ethiopia.Niolo-Saharan	Tanzania.Hadzabe	Cameroon.Fulani	Tanzania.Sandawe	Ethiopia.Sabue	info	CLIN_SIG	Condel	CADD_PHRED	LoFtool	SIFT	PolyPhen
8	143018053	.	G	A	G	A	0.000567108	N	N	N	N	N	0.000711238	0	0	0	0	0	0	0.00296443	0	0	0	0	0	0	CSQ=A|upstream_gene_variant|MODIFIER|LY6E|ENSG00000160932|Transcript|ENST00000292494.11|protein_coding|||||||||||476|1||HGNC|HGNC:6727|NM_002346.3|1|P2|||||||||||||||||||||||||||2.884|0.107717|0.267,A|upstream_gene_variant|MODIFIER|LY6E|ENSG00000160932|Transcript|ENST00000429120.6|protein_coding|||||||||||430|1||HGNC|HGNC:6727||1|P2|||||||||||||||||||||||||||2.884|0.107717|0.267,A|intron_variant&…	N	N	2.884	0.267	N	N
8	143018077	.	C	T	C	T	0.0015537	0	0	0.00453858	0	0	0.00216606	0	0.00222222	0	0	0	0	0.00494071	0	0	0	0	0	0	CSQ=T|upstream_gene_variant|MODIFIER|LY6E|ENSG00000160932|Transcript|ENST00000292494.11|protein_coding||||||||||rs557396532|452|1||HGNC|HGNC:6727|NM_002346.3|1|P2|||0.0012|0.0045|0|0|0|0|0.0003793|0.007566|4.126e-05|0|0|0|2.148e-05|0|0||||||||||1.824|0.008066|0.267,T|upstream_gene_variant|MODIFIER|LY6E|ENSG00000160932|Transcript|ENST00000429120.6|protein_coding||||||||||rs557396532|406|1||HGNC|HG…	N	N	1.824	0.267	N	N
8	143018120	.	C	A	C	A	0.000679744	0	0	0.00302572	0.00144092	0	0.000722022	0	0	0	0	0	0	0	0	0	0	0	0	0	CSQ=A|upstream_gene_variant|MODIFIER|LY6E|ENSG00000160932|Transcript|ENST00000292494.11|protein_coding||||||||||rs575914186|409|1||HGNC|HGNC:6727|NM_002346.3|1|P2|||0.0010|0.003|0.0014|0|0|0|0.0001169|0.002463|0|0|0|0|0|0|0||||||||||8.714|0.662342|0.267,A|upstream_gene_variant|MODIFIER|LY6E|ENSG00000160932|Transcript|ENST00000429120.6|protein_coding||||||||||rs575914186|363|1||HGNC|HGNC:6727||1|P…	N	N	8.714	0.267	N	N
8	143018132	rs546144663	G	A	G	A	0.000399361	0	0	0.00075643	0.00144092	0	0.00075643	N	N	N	N	N	N	N	N	N	N	N	N	N	CSQ=A|upstream_gene_variant|MODIFIER|LY6E|ENSG00000160932|Transcript|ENST00000292494.11|protein_coding||||||||||rs546144663|397|1||HGNC|HGNC:6727|NM_002346.3|1|P2|||0.0004|0.0008|0.0014|0|0|0|0.0001946|0|0.0006571|0.0001236|0|0.0001853|0.0001467|0|0||||||||||4.679|0.248379|0.267,A|upstream_gene_variant|MODIFIER|LY6E|ENSG00000160932|Transcript|ENST00000429120.6|protein_coding||||||||||rs546144663|…	N	N	4.679	0.267	N	N
8	143018134	.	G	A	G	A	0.00245747	N	N	N	N	N	0.00308203	0	0	0	0	0	0	0.0128458	0	0	0	0	0	0	CSQ=A|upstream_gene_variant|MODIFIER|LY6E|ENSG00000160932|Transcript|ENST00000292494.11|protein_coding||||||||||rs1310316386|395|1||HGNC|HGNC:6727|NM_002346.3|1|P2|||||||||7.785e-06|0|0|0|0|0|0|0|4.467e-05||||||||||6.008|0.364034|0.267,A|upstream_gene_variant|MODIFIER|LY6E|ENSG00000160932|Transcript|ENST00000429120.6|protein_coding||||||||||rs1310316386|349|1||HGNC|HGNC:6727||1|P2|||||||||7.785e-…	N	N	6.008	0.267	N	N
8	143018191	rs564117712	A	C	A	C	0.000399361	0.00198413	0	0	0	0	0	N	N	N	N	N	N	N	N	N	N	N	N	N	CSQ=C|upstream_gene_variant|MODIFIER|LY6E|ENSG00000160932|Transcript|ENST00000292494.11|protein_coding||||||||||rs564117712|338|1||HGNC|HGNC:6727|NM_002346.3|1|P2|||0.0004|0|0|0.002|0|0|2.334e-05|0|0|0|0.0002876|0|0|0|0||||||||||7.350|0.502350|0.267,C|upstream_gene_variant|MODIFIER|LY6E|ENSG00000160932|Transcript|ENST00000429120.6|protein_coding||||||||||rs564117712|292|1||HGNC|HGNC:6727||1|P2|||…	N	N	7.35	0.267	N	N
8	143018224	.	T	C	T	C	0.00245747	N	N	N	N	N	0.00165955	0	0	0	0	0.0361446	0.00980392	0	0	0	0	0	0	0	CSQ=C|upstream_gene_variant|MODIFIER|LY6E|ENSG00000160932|Transcript|ENST00000292494.11|protein_coding||||||||||rs1430493452|305|1||HGNC|HGNC:6727|NM_002346.3|1|P2|||||||||||||||||||||||||||6.915|0.455182|0.267,C|upstream_gene_variant|MODIFIER|LY6E|ENSG00000160932|Transcript|ENST00000429120.6|protein_coding||||||||||rs1430493452|259|1||HGNC|HGNC:6727||1|P2|||||||||||||||||||||||||||6.915|0.455182…	N	N	6.915	0.267	N	N
8	143018236	rs185102744	C	T	C	T	0.000199681	0	0	0	0.00144092	0	0	N	N	N	N	N	N	N	N	N	N	N	N	N	CSQ=T|upstream_gene_variant|MODIFIER|LY6E|ENSG00000160932|Transcript|ENST00000292494.11|protein_coding||||||||||rs185102744|293|1||HGNC|HGNC:6727|NM_002346.3|1|P2|||0.0002|0|0.0014|0|0|0|0.000101|0|0.0004928|0.0001236|0|0|0|0|0||||||||||3.350|0.145121|0.267,T|upstream_gene_variant|MODIFIER|LY6E|ENSG00000160932|Transcript|ENST00000429120.6|protein_coding||||||||||rs185102744|247|1||HGNC|HGNC:6727|…	N	N	3.35	0.267	N	N
8	143020941	.	TGAA	T	T	T	0.000189036	N	N	N	N	N	0	0	0	0	0	0	0	0	0	0	0	0	0	0	CSQ=-|start_lost&inframe_deletion|HIGH|LY6E|ENSG00000160932|Transcript|ENST00000292494.11|protein_coding|2/4||||118-120|3-5|1-2|MK/M|atGAAg/atg|rs779461200||1||HGNC|HGNC:6727|NM_002346.3|1|P2|||||||||2.389e-05|0.0003694|0|0|0|0|0|0|0||||||||||17.93|1.878281|0.267,-|start_lost&inframe_deletion|HIGH|LY6E|ENSG00000160932|Transcript|ENST00000429120.6|protein_coding|2/4||||159-161|3-5|1-2|MK/M|atGAAg/…	N	N	17.93	0.267	N	N
8	143020946	.	ATCT	A	A	A	0.000189036	N	N	N	N	N	0	0	0	0	0	0	0	0	0	0	0	0	0	0	CSQ=-|inframe_deletion|MODERATE|LY6E|ENSG00000160932|Transcript|ENST00000292494.11|protein_coding|2/4||||123-125|8-10|3-4|IF/I|aTCTtc/atc|rs752304887||1||HGNC|HGNC:6727|NM_002346.3|1|P2|||||||||7.963e-06|0|0|0|0|0|8.806e-06|0|3.267e-05||||||||||10.04|0.810435|0.267,-|inframe_deletion|MODERATE|LY6E|ENSG00000160932|Transcript|ENST00000429120.6|protein_coding|2/4||||164-166|8-10|3-4|IF/I|aTCTtc/atc|…	N	N	10.04	0.267	N	N
8	143020958	.	G	A	G	A	0.000189036	N	N	N	N	N	0	0	0	0	0	0	0	0	0	0	0	0	0	0	CSQ=A|missense_variant|MODERATE|LY6E|ENSG00000160932|Transcript|ENST00000292494.11|protein_coding|2/4||||134|19|7|V/M|Gtg/Atg|COSV52870204||1||HGNC|HGNC:6727|NM_002346.3|1|P2|tolerated(0.13)|benign(0.017)|||||||||||||||||1|1||||||neutral(0.253)|8.461|0.631893|0.267,A|missense_variant|MODERATE|LY6E|ENSG00000160932|Transcript|ENST00000429120.6|protein_coding|2/4||||175|19|7|V/M|Gtg/Atg|COSV52870204…	N	neutral(0.253)	8.461	0.267	tolerated(0.13)	benign(0.017)
8	143021320	.	C	T	C	T	0.000189036	N	N	N	N	N	0	0	0	0	0	0	0	0	0	0	0	0	0	0	CSQ=T|missense_variant|MODERATE|LY6E|ENSG00000160932|Transcript|ENST00000292494.11|protein_coding|3/4||||174|59|20|S/L|tCg/tTg|rs368130997&COSV52869776||1||HGNC|HGNC:6727|NM_002346.3|1|P2|deleterious(0.02)|benign(0.011)|||||||2.794e-05|0|8.684e-05|0|5.438e-05|0|8.821e-06|0|6.537e-05||0&1|0&1||||||neutral(0.384)|14.62|1.319386|0.267,T|missense_variant|MODERATE|LY6E|ENSG00000160932|Transcript|ENST0…	N	neutral(0.384)	14.62	0.267	deleterious(0.02)	benign(0.011)
8	143021330	rs11547127	C	T	C	T	0.057584	0.184524	0.0526839	0.00302572	0.0360231	0.153374	0.0279783	0.0833333	0	0.0526316	0.0625	0.0361446	0.0196078	0.0602767	0	0.0967742	0	0.0439189	0.0824176	0.118421	CSQ=T|synonymous_variant|LOW|LY6E|ENSG00000160932|Transcript|ENST00000292494.11|protein_coding|3/4||||184|69|23|C|tgC/tgT|rs11547127&COSV52869971||1||HGNC|HGNC:6727|NM_002346.3|1|P2|||0.0835|0.003|0.036|0.1845|0.0527|0.1534|0.0656|0.007882|0.01687|0.05425|0.1689|0.0781|0.05079|0.05601|0.141||0&1|0&1|||||||16.15|1.575740|0.267,T|synonymous_variant|LOW|LY6E|ENSG00000160932|Transcript|ENST0000042912…	N	N	16.15	0.267	N	N
8	143021375	rs565415664	G	A	G	A	0.000199681	0.000992063	0	0	0	0	0	N	N	N	N	N	N	N	N	N	N	N	N	N	CSQ=A|synonymous_variant|LOW|LY6E|ENSG00000160932|Transcript|ENST00000292494.11|protein_coding|3/4||||229|114|38|P|ccG/ccA|rs565415664||1||HGNC|HGNC:6727|NM_002346.3|1|P2|||0.0002|0|0|0.001|0|0|2.387e-05|0|0|0|0.0002719|0|8.797e-06|0|0||||||||||4.597|0.241794|0.267,A|synonymous_variant|LOW|LY6E|ENSG00000160932|Transcript|ENST00000429120.6|protein_coding|3/4||||270|114|38|P|ccG/ccA|rs565415664||1|…	N	N	4.597	0.267	N	N
8	143021423	rs535909345	T	G	T	G	0.000199681	0	0	0.00075643	0	0	0.00075643	N	N	N	N	N	N	N	N	N	N	N	N	N	CSQ=G|missense_variant|MODERATE|LY6E|ENSG00000160932|Transcript|ENST00000292494.11|protein_coding|3/4||||277|162|54|S/R|agT/agG|rs535909345||1||HGNC|HGNC:6727|NM_002346.3|1|P2|deleterious(0.04)|possibly_damaging(0.728)|0.0002|0.0008|0|0|0|0|3.979e-06|6.158e-05|0|0|0|0|0|0|0|||||||||deleterious(0.614)|13.36|1.129591|0.267,G|missense_variant|MODERATE|LY6E|ENSG00000160932|Transcript|ENST00000429120.…	N	deleterious(0.614)	13.36	0.267	deleterious(0.04)	possibly_damaging(0.728)
8	143021446	rs200712479	C	G	C	G	0.000199681	0	0.000994036	0	0	0	0	N	N	N	N	N	N	N	N	N	N	N	N	N	CSQ=G|intron_variant|MODIFIER|LY6E|ENSG00000160932|Transcript|ENST00000292494.11|protein_coding||3/3||||||||rs200712479||1||HGNC|HGNC:6727|NM_002346.3|1|P2|||0.0002|0|0|0|0.001|0|3.584e-05|0|5.786e-05|0|0|0|6.168e-05|0|0||||||||||0.620|-0.178461|0.267,G|intron_variant|MODIFIER|LY6E|ENSG00000160932|Transcript|ENST00000429120.6|protein_coding||3/3||||||||rs200712479||1||HGNC|HGNC:6727||1|P2|||0.000…	N	N	0.62	0.267	N	N
8	143021454	rs113626160	C	T	C	T	0.00199681	0	0	0.0075643	0	0	0.0075643	N	N	N	N	N	N	N	N	N	N	N	N	N	CSQ=T|intron_variant|MODIFIER|LY6E|ENSG00000160932|Transcript|ENST00000292494.11|protein_coding||3/3||||||||rs113626160&COSV52870159||1||HGNC|HGNC:6727|NM_002346.3|1|P2|||0.0020|0.0076|0|0|0|0|0.0004623|0.006351|0.0003182|0|0|0|8.823e-06|0.0001632|0||0&1|0&1|||||||0.764|-0.145375|0.267,T|intron_variant|MODIFIER|LY6E|ENSG00000160932|Transcript|ENST00000429120.6|protein_coding||3/3||||||||rs1136261…	N	N	0.764	0.267	N	N
8	143021455	rs111344770	G	A	G	A	0.035638	0	0	0.0930408	0.00720461	0	0.0516245	0.0666667	0.06	0.0210526	0	0.0361446	0.0784314	0.0266798	0.015411	0.0322581	0.0517711	0.0472973	0.0384615	0.0131579	CSQ=A|intron_variant|MODIFIER|LY6E|ENSG00000160932|Transcript|ENST00000292494.11|protein_coding||3/3||||||||rs111344770||1||HGNC|HGNC:6727|NM_002346.3|1|P2|||0.0256|0.093|0.0072|0|0|0|0.005839|0.08135|0.002951|0|0|0|0.0002206|0.00196|0.0002287||||||||||0.072|-0.462851|0.267,A|intron_variant|MODIFIER|LY6E|ENSG00000160932|Transcript|ENST00000429120.6|protein_coding||3/3||||||||rs111344770||1||HGNC|…	N	N	0.072	0.267	N	N
8	143021457	rs200123143	G	A	G	A	0.000582637	0	0	0.00151286	0	0	0.000722022	0.00333333	0	0.00526316	0	0	0	0	0	0	0	0	0	0	CSQ=A|intron_variant|MODIFIER|LY6E|ENSG00000160932|Transcript|ENST00000292494.11|protein_coding||3/3||||||||rs200123143||1||HGNC|HGNC:6727|NM_002346.3|1|P2|||0.0004|0.0015|0|0|0|0|0.0001395|0.001912|8.681e-05|0|0|0|0|0|3.266e-05||||||||||3.019|0.118751|0.267,A|intron_variant|MODIFIER|LY6E|ENSG00000160932|Transcript|ENST00000429120.6|protein_coding||3/3||||||||rs200123143||1||HGNC|HGNC:6727||1|P2|…	N	N	3.019	0.267	N	N
8	143021552	rs200177123	C	A	C	A	0.000199681	0.000992063	0	0	0	0	0	N	N	N	N	N	N	N	N	N	N	N	N	N	CSQ=A|intron_variant|MODIFIER|LY6E|ENSG00000160932|Transcript|ENST00000292494.11|protein_coding||3/3||||||||rs200177123||1||HGNC|HGNC:6727|NM_002346.3|1|P2|||0.0002|0|0|0.001|0|0|1.594e-05|0|0|0|0.0002175|0|0|0|0||||||||||0.108|-0.413179|0.267,A|intron_variant|MODIFIER|LY6E|ENSG00000160932|Transcript|ENST00000429120.6|protein_coding||3/3||||||||rs200177123||1||HGNC|HGNC:6727||1|P2|||0.0002|0|0|0.…	N	N	0.108	0.267	N	N
8	143021562	.	G	A	G	A	0.000567108	N	N	N	N	N	0.000711238	0	0	0.0105263	0	0	0	0.000988142	0	0	0	0	0	0	CSQ=A|splice_region_variant&intron_variant|LOW|LY6E|ENSG00000160932|Transcript|ENST00000292494.11|protein_coding||3/3||||||||||1||HGNC|HGNC:6727|NM_002346.3|1|P2|||||||||||||||||||||||||||0.749|-0.148432|0.267,A|splice_region_variant&intron_variant|LOW|LY6E|ENSG00000160932|Transcript|ENST00000429120.6|protein_coding||3/3||||||||||1||HGNC|HGNC:6727||1|P2|||||||||||||||||||||||||||0.749|-0.148432|0…	N	N	0.749	0.267	N	N
8	143021571	rs373400134	C	T	C	T	0.000756144	N	N	N	N	N	0.000711238	0	0	0	0	0	0	0	0	0.0483871	0	0	0	0	CSQ=T|missense_variant|MODERATE|LY6E|ENSG00000160932|Transcript|ENST00000292494.11|protein_coding|4/4||||293|178|60|L/F|Ctc/Ttc|rs373400134&COSV52869961||1||HGNC|HGNC:6727|NM_002346.3|1|P2|tolerated(0.22)|benign(0.125)|||||||||||||||||0&1|0&1||||||neutral(0.053)|0.224|-0.320739|0.267,T|missense_variant|MODERATE|LY6E|ENSG00000160932|Transcript|ENST00000429120.6|protein_coding|4/4||||334|178|60|L/F…	N	neutral(0.053)	0.224	0.267	tolerated(0.22)	benign(0.125)
8	143021573	rs11267029	C	T	C	T	0.000199681	0	0.000994036	0	0	0	0	N	N	N	N	N	N	N	N	N	N	N	N	N	CSQ=T|synonymous_variant|LOW|LY6E|ENSG00000160932|Transcript|ENST00000292494.11|protein_coding|4/4||||295|180|60|L|ctC/ctT|rs11267029||1||HGNC|HGNC:6727|NM_002346.3|1|P2|||0.0002|0|0|0|0.001|0|0.000235|0|0.0007811|0|0|0|0.000282|0|0||||||||||1.813|0.006794|0.267,T|synonymous_variant|LOW|LY6E|ENSG00000160932|Transcript|ENST00000429120.6|protein_coding|4/4||||336|180|60|L|ctC/ctT|rs11267029||1||HGN…	N	N	1.813	0.267	N	N
8	143021619	.	C	A	C	A	0.000189036	N	N	N	N	N	0.000237079	0	0	0	0	0	0	0.000988142	0	0	0	0	0	0	CSQ=A|missense_variant|MODERATE|LY6E|ENSG00000160932|Transcript|ENST00000292494.11|protein_coding|4/4||||341|226|76|P/T|Ccc/Acc|||1||HGNC|HGNC:6727|NM_002346.3|1|P2|deleterious(0)|possibly_damaging(0.473)||||||||||||||||||||||||deleterious(0.601)|17.46|1.800597|0.267,A|missense_variant|MODERATE|LY6E|ENSG00000160932|Transcript|ENST00000429120.6|protein_coding|4/4||||382|226|76|P/T|Ccc/Acc|||1||HGN…	N	deleterious(0.601)	17.46	0.267	deleterious(0)	possibly_damaging(0.473)
8	143021638	rs376767323	A	G	A	G	0.000194212	0	0	0.00075643	0	0	0.000180505	0	0	0	0	0	0	0	0	0	0	0	0	0	CSQ=G|missense_variant|MODERATE|LY6E|ENSG00000160932|Transcript|ENST00000292494.11|protein_coding|4/4||||360|245|82|N/S|aAt/aGt|rs376767323||1||HGNC|HGNC:6727|NM_002346.3|1|P2|deleterious(0.01)|benign(0.391)|0.0002|0.0008|0|0|0|0|4.773e-05|0.0004307|2.892e-05|0|5.437e-05|0|2.638e-05|0|0|||||||||deleterious(0.531)|12.12|0.999542|0.267,G|missense_variant|MODERATE|LY6E|ENSG00000160932|Transcript|ENS…	N	deleterious(0.531)	12.12	0.267	deleterious(0.01)	benign(0.391)
8	143021658	rs531928812	G	A	G	A	0.000199681	0	0	0	0.00144092	0	0	N	N	N	N	N	N	N	N	N	N	N	N	N	CSQ=A|missense_variant|MODERATE|LY6E|ENSG00000160932|Transcript|ENST00000292494.11|protein_coding|4/4||||380|265|89|G/S|Ggc/Agc|rs531928812&COSV52869918||1||HGNC|HGNC:6727|NM_002346.3|1|P2|tolerated(1)|possibly_damaging(0.591)|0.0002|0|0.0014|0|0|0|7.956e-06|0|5.784e-05|0|0|0|0|0|0||0&1|0&1||||||neutral(0.204)|9.672|0.773344|0.267,A|missense_variant|MODERATE|LY6E|ENSG00000160932|Transcript|ENST00…	N	neutral(0.204)	9.672	0.267	tolerated(1)	possibly_damaging(0.591)
8	143021703	rs111560737	G	A	G	A	0.0242766	0	0.00198807	0.00226929	0	0	0.0362816	0.04	0.00666667	0.0210526	0.0625	0.361446	0.0294118	0.0355731	0.0804795	0.0483871	0.00817439	0	0.0384615	0.171053	CSQ=A|missense_variant|MODERATE|LY6E|ENSG00000160932|Transcript|ENST00000292494.11|protein_coding|4/4||||425|310|104|D/N|Gat/Aat|rs111560737||1||HGNC|HGNC:6727|NM_002346.3|1|P2|tolerated(1)|benign(0)|0.0010|0.0023|0|0|0.002|0|0.001443|0.004563|0.0007232|0.007651|0.0007071|0|0.0007939|0.002285|0.002254|||||||||neutral(0.000)|0.752|-0.147926|0.267,A|missense_variant|MODERATE|LY6E|ENSG00000160932|Tr…	N	neutral(0.000)	0.752	0.267	tolerated(1)	benign(0)
8	143021724	rs61997238	G	A	G	A	0.00504952	0.000992063	0	0.0143722	0.00144092	0	0.00703971	0.00333333	0.00666667	0.0210526	0	0	0	0	0.0171233	0	0.0013624	0	0.00549451	0	CSQ=A|missense_variant|MODERATE|LY6E|ENSG00000160932|Transcript|ENST00000292494.11|protein_coding|4/4||||446|331|111|V/I|Gtc/Atc|rs61997238||1||HGNC|HGNC:6727|NM_002346.3|1|P2|tolerated(0.36)|benign(0)|0.0042|0.0144|0.0014|0.001|0|0|0.0009553|0.01348|0.000434|0|5.444e-05|0|2.655e-05|0.0003273|0|||||||||neutral(0.020)|0.784|-0.141107|0.267,A|missense_variant|MODERATE|LY6E|ENSG00000160932|Transcrip…	N	neutral(0.020)	0.784	0.267	tolerated(0.36)	benign(0)
8	143023683	rs116014994	G	A	G	A	0.0175762	0	0	0.0385779	0.00144092	0	0.0292419	0.02	0.0577778	0.0157895	0.015625	0.0120482	0.00980392	0.013834	0	0	0.0694823	0	0.0164835	0.0526316	CSQ=A|downstream_gene_variant|MODIFIER|LY6E|ENSG00000160932|Transcript|ENST00000292494.11|protein_coding||||||||||rs116014994|1274|1||HGNC|HGNC:6727|NM_002346.3|1|P2|||0.0104|0.0386|0.0014|0|0|0|0.001876|0.02627|0.00267|0|0|0|6.287e-05|0.002249|0.0001787||||||||||1.519|-0.026985|0.267,A|downstream_gene_variant|MODIFIER|LY6E|ENSG00000160932|Transcript|ENST00000429120.6|protein_coding||||||||||rs11…	N	N	1.519	0.267	N	N
8	143023689	rs536194293	G	C	G	C	0.000199681	0	0	0.00075643	0	0	0.00075643	N	N	N	N	N	N	N	N	N	N	N	N	N	CSQ=C|downstream_gene_variant|MODIFIER|LY6E|ENSG00000160932|Transcript|ENST00000292494.11|protein_coding||||||||||rs536194293|1280|1||HGNC|HGNC:6727|NM_002346.3|1|P2|||0.0002|0.0008|0|0|0|0|||||||||||||||||||1.898|0.015923|0.267,C|downstream_gene_variant|MODIFIER|LY6E|ENSG00000160932|Transcript|ENST00000429120.6|protein_coding||||||||||rs536194293|1279|1||HGNC|HGNC:6727||1|P2|||0.0002|0.0008|0|0|…	N	N	1.898	0.267	N	N
8	143023692	rs557364269	A	C	A	C	0.000199681	0.000992063	0	0	0	0	0	N	N	N	N	N	N	N	N	N	N	N	N	N	CSQ=C|downstream_gene_variant|MODIFIER|LY6E|ENSG00000160932|Transcript|ENST00000292494.11|protein_coding||||||||||rs557364269|1283|1||HGNC|HGNC:6727|NM_002346.3|1|P2|||0.0002|0|0|0.001|0|0|||||||||||||||||||0.633|-0.175249|0.267,C|downstream_gene_variant|MODIFIER|LY6E|ENSG00000160932|Transcript|ENST00000429120.6|protein_coding||||||||||rs557364269|1282|1||HGNC|HGNC:6727||1|P2|||0.0002|0|0|0.001|0…	N	N	0.633	0.267	N	N
