# Supplementary material for: Impact of natural selection on global patterns of genetic variation, and association with clinical phenotypes, at genes involved in SARS-CoV-2 infection
Source: Res Sq. 2021 Jul 27:rs.3.rs-673011. Preprint. [Version 1] doi: 10.21203/rs.3.rs-673011/v1 (PMC8328070; doi:10.21203/rs.3.rs-673011/v1)
Supplement: Supplement 14 [file 0447d8e63dd7b3c92a1d2809.xlsx]

## Sheet: Sheet 1
Broad Clinical Condition	MONDO_TERM_ID	MONDO_DISEASE_CLASS	CODE_STANDARD_NAME	CODE	ICD Code Description
acute cardiac injury	MONDO:0004781	acute myocardial infarction	ICD10CM	I21.01	ST ELEVATION (STEMI) MYOCARDIAL INFARCTION INVOLVING LEFT MAIN CORONARY ARTERY
acute cardiac injury	MONDO:0004781	acute myocardial infarction	ICD10CM	I21.02	ST ELEVATION (STEMI) MYOCARDIAL INFARCTION INVOLVING LEFT ANTERIOR DESCENDING CORONARY ARTERY
acute cardiac injury	MONDO:0004781	acute myocardial infarction	ICD10CM	I21.09	ST ELEVATION (STEMI) MYOCARDIAL INFARCTION INVOLVING OTHER CORONARY ARTERY OF ANTERIOR WALL
acute cardiac injury	MONDO:0004781	acute myocardial infarction	ICD10CM	I21.11	ST ELEVATION (STEMI) MYOCARDIAL INFARCTION INVOLVING RIGHT CORONARY ARTERY
acute cardiac injury	MONDO:0004781	acute myocardial infarction	ICD10CM	I21.19	ST ELEVATION (STEMI) MYOCARDIAL INFARCTION INVOLVING OTHER CORONARY ARTERY OF INFERIOR WALL
acute cardiac injury	MONDO:0004781	acute myocardial infarction	ICD10CM	I21.21	ST ELEVATION (STEMI) MYOCARDIAL INFARCTION INVOLVING LEFT CIRCUMFLEX CORONARY ARTERY
acute cardiac injury	MONDO:0004781	acute myocardial infarction	ICD10CM	I21.29	ST ELEVATION (STEMI) MYOCARDIAL INFARCTION INVOLVING OTHER SITES
acute cardiac injury	MONDO:0004781	acute myocardial infarction	ICD10CM	I21.3	ST ELEVATION (STEMI) MYOCARDIAL INFARCTION OF UNSPECIFIED SITE
acute cardiac injury	MONDO:0004781	acute myocardial infarction	ICD10CM	I21.4	NON-ST ELEVATION (NSTEMI) MYOCARDIAL INFARCTION
acute cardiac injury	MONDO:0004781	acute myocardial infarction	ICD10CM	I21.9	ACUTE MYOCARDIAL INFARCTION, UNSPECIFIED SITE, INITIAL EPISODE OF CARE
acute cardiac injury	MONDO:0004781	acute myocardial infarction	ICD10CM	I21.A1	MYOCARDIAL INFARCTION TYPE 2
acute cardiac injury	MONDO:0004781	acute myocardial infarction	ICD10CM	I21.A9	OTHER MYOCARDIAL INFARCTION TYPE
acute cardiac injury	MONDO:0004781	acute myocardial infarction	ICD9CM	410	Acute myocardial infarction
acute cardiac injury	MONDO:0004781	acute myocardial infarction	ICD9CM	410.1	Acute myocardial infarction of other anterior wall
acute cardiac injury	MONDO:0004781	acute myocardial infarction	ICD9CM	410.11	ACUTE MYOCARDIAL INFARCTION OF OTHER ANTERIOR WALL, INITIAL EPISODE OF CARE
acute cardiac injury	MONDO:0004781	acute myocardial infarction	ICD9CM	410.12	ACUTE MYOCARDIAL INFARCTION OF OTHER ANTERIOR WALL, SUBSEQUENT EPISODE OF CARE
acute cardiac injury	MONDO:0004781	acute myocardial infarction	ICD9CM	410.42	ACUTE MYOCARDIAL INFARCTION OF OTHER INFERIOR WALL, SUBSEQUENT EPISODE OF CARE
acute cardiac injury	MONDO:0004781	acute myocardial infarction	ICD9CM	410.51	ACUTE MYOCARDIAL INFARCTION OF OTHER LATERAL WALL, INITIAL EPISODE OF CARE
acute cardiac injury	MONDO:0004781	acute myocardial infarction	ICD9CM	410.52	ACUTE MYOCARDIAL INFARCTION OF OTHER LATERAL WALL, SUBSEQUENT EPISODE OF CARE
acute cardiac injury	MONDO:0004781	acute myocardial infarction	ICD9CM	410.81	ACUTE MYOCARDIAL INFARCTION OF OTHER SPECIFIED SITES, INITIAL EPISODE OF CARE
acute cardiac injury	MONDO:0004781	acute myocardial infarction	ICD9CM	410.9	Acute myocardial infarction of unspecified site
acute cardiac injury	MONDO:0004781	acute myocardial infarction	ICD9CM	410.9	ACUTE MYOCARDIAL INFARCTION OF UNSPECIFIED SITE, EPISODE OF CARE UNSPECIFIED
acute cardiac injury	MONDO:0004781	acute myocardial infarction	ICD9CM	410.92	ACUTE MYOCARDIAL INFARCTION OF UNSPECIFIED SITE, SUBSEQUENT EPISODE OF CARE
acute cardiac injury	MONDO:0002815	acute myocarditis	ICD10CM	I33.9	ACUTE AND SUBACUTE ENDOCARDITIS, UNSPECIFIED
acute cardiac injury	MONDO:0002815	acute myocarditis	ICD10CM	I40.8	OTHER ACUTE MYOCARDITIS
acute cardiac injury	MONDO:0002815	acute myocarditis	ICD9CM	422	ACUTE MYOCARDITIS IN DISEASES CLASSIFIED ELSEWHERE
acute cardiac injury	MONDO:0002815	acute myocarditis	ICD9CM	422.9	ACUTE MYOCARDITIS, UNSPECIFIED
acute liver injury	MONDO:0001548	hepatic coma	ICD10CM	K72.91	HEPATIC FAILURE, UNSPECIFIED WITH COMA
acute liver injury	MONDO:0001548	hepatic coma	ICD9CM	70.6	UNSPECIFIED VIRAL HEPATITIS WITH HEPATIC COMA
acute liver injury	MONDO:0001548	hepatic coma	ICD9CM	70.71	UNSPECIFIED VIRAL HEPATITIS C WITH HEPATIC COMA
acute liver injury	MONDO:0001711	hepatic encephalopathy	ICD10CM	K72.00	ACUTE AND SUBACUTE HEPATIC FAILURE WITHOUT COMA
acute liver injury	MONDO:0001711	hepatic encephalopathy	ICD10CM	K72.01	ACUTE AND SUBACUTE HEPATIC FAILURE WITH COMA
acute liver injury	MONDO:0001711	hepatic encephalopathy	ICD10CM	K72.90	HEPATIC FAILURE, UNSPECIFIED WITHOUT COMA
acute liver injury	MONDO:0005155	cirrhosis of liver	ICD9CM	571.42	AUTOIMMUNE HEPATITIS
acute kidney injury	MONDO:0002492	acute kidney failure	ICD10CM	N17.1	ACUTE KIDNEY FAILURE WITH ACUTE CORTICAL NECROSIS
acute kidney injury	MONDO:0002492	acute kidney failure	ICD10CM	N17.2	ACUTE KIDNEY FAILURE WITH MEDULLARY NECROSIS
acute kidney injury	MONDO:0002492	acute kidney failure	ICD10CM	N17.8	OTHER ACUTE KIDNEY FAILURE
acute kidney injury	MONDO:0002492	acute kidney failure	ICD10CM	N17.9	ACUTE KIDNEY FAILURE, UNSPECIFIED
acute kidney injury	MONDO:0002492	acute kidney failure	ICD9CM	584	Acute kidney failure
acute kidney injury	MONDO:0002492	acute kidney failure	ICD9CM	584.6	Acute kidney failure with lesion of renal cortical necrosis
acute kidney injury	MONDO:0002492	acute kidney failure	ICD9CM	584.8	ACUTE KIDNEY FAILURE WITH OTHER SPECIFIED PATHOLOGICAL LESION IN KIDNEY
acute kidney injury	MONDO:0002492	acute kidney failure	ICD9CM	584.9	ACUTE KIDNEY FAILURE, UNSPECIFIED
acute kidney injury	MONDO:0001106	kidney failure	ICD10CM	D59.3	HEMOLYTIC-UREMIC SYNDROME
acute kidney injury	MONDO:0001106	kidney failure	ICD10CM	K76.7	HEPATORENAL SYNDROME
acute kidney injury	MONDO:0001106	kidney failure	ICD9CM	283.11	HEMOLYTIC-UREMIC SYNDROME
acute kidney injury	MONDO:0001106	kidney failure	ICD9CM	403.11	HYPERTENSIVE CHRONIC KIDNEY DISEASE, BENIGN, WITH CHRONIC KIDNEY DISEASE STAGE V OR END STAGE RENAL DISEASE
acute kidney injury	MONDO:0001106	kidney failure	ICD9CM	403.91	HYPERTENSIVE CHRONIC KIDNEY DISEASE, UNSPECIFIED, WITH CHRONIC KIDNEY DISEASE STAGE V OR END STAGE RENAL DISEASE
acute kidney injury	MONDO:0001106	kidney failure	ICD9CM	404.12	HYPERTENSIVE HEART AND CHRONIC KIDNEY DISEASE, BENIGN, WITHOUT HEART FAILURE AND WITH CHRONIC KIDNEY DISEASE STAGE V OR END STAGE RENAL DISEASE
acute kidney injury	MONDO:0001106	kidney failure	ICD9CM	404.13	HYPERTENSIVE HEART AND CHRONIC KIDNEY DISEASE, BENIGN, WITH HEART FAILURE AND CHRONIC KIDNEY DISEASE STAGE V OR END STAGE RENAL DISEASE
acute kidney injury	MONDO:0001106	kidney failure	ICD9CM	404.92	HYPERTENSIVE HEART AND CHRONIC KIDNEY DISEASE, UNSPECIFIED, WITHOUT HEART FAILURE AND WITH CHRONIC KIDNEY DISEASE STAGE V OR END STAGE RENAL DISEASE
acute kidney injury	MONDO:0001106	kidney failure	ICD9CM	404.93	HYPERTENSIVE HEART AND CHRONIC KIDNEY DISEASE, UNSPECIFIED, WITH HEART FAILURE AND CHRONIC KIDNEY DISEASE STAGE V OR END STAGE RENAL DISEASE
acute kidney injury	MONDO:0001106	kidney failure	ICD9CM	572.4	HEPATORENAL SYNDROME
acute kidney injury	MONDO:0001106	kidney failure	ICD9CM	586	RENAL FAILURE, UNSPECIFIED
acute kidney injury	MONDO:0001106	kidney failure	ICD9CM	674.82	OTHER COMPLICATIONS OF PUERPERIUM, DELIVERED, WITH MENTION OF POSTPARTUM COMPLICATION
ACUTE RESPIRATORY DISTRESS SYNDROME	MONDO:0003900	ACUTE RESPIRATORY DISTRESS SYNDROME	ICD10CM	J80	ACUTE RESPIRATORY DISTRESS SYNDROME
Respiratory Related	MONDO:0005249	pneumonia	ICD10CM	J09.X1	INFLUENZA DUE TO IDENTIFIED NOVEL INFLUENZA A VIRUS WITH PNEUMONIA
Respiratory Related	MONDO:0005249	pneumonia	ICD10CM	J09.X2	INFLUENZA DUE TO IDENTIFIED NOVEL INFLUENZA A VIRUS WITH OTHER RESPIRATORY MANIFESTATIONS
Respiratory Related	MONDO:0005249	pneumonia	ICD10CM	J09.X9	INFLUENZA DUE TO IDENTIFIED NOVEL INFLUENZA A VIRUS WITH OTHER MANIFESTATIONS
Respiratory Related	MONDO:0005249	pneumonia	ICD10CM	J10.00	INFLUENZA DUE TO OTHER IDENTIFIED INFLUENZA VIRUS WITH UNSPECIFIED TYPE OF PNEUMONIA
Respiratory Related	MONDO:0005249	pneumonia	ICD10CM	J10.01	INFLUENZA DUE TO OTHER IDENTIFIED INFLUENZA VIRUS WITH THE SAME OTHER IDENTIFIED INFLUENZA VIRUS PNEUMONIA
Respiratory Related	MONDO:0005249	pneumonia	ICD10CM	J10.08	INFLUENZA DUE TO OTHER IDENTIFIED INFLUENZA VIRUS WITH OTHER SPECIFIED PNEUMONIA
Respiratory Related	MONDO:0005249	pneumonia	ICD10CM	J10.1	INFLUENZA DUE TO OTHER IDENTIFIED INFLUENZA VIRUS WITH OTHER RESPIRATORY MANIFESTATIONS
Respiratory Related	MONDO:0005249	pneumonia	ICD10CM	J10.2	INFLUENZA DUE TO OTHER IDENTIFIED INFLUENZA VIRUS WITH GASTROINTESTINAL MANIFESTATIONS
Respiratory Related	MONDO:0005249	pneumonia	ICD10CM	J10.81	INFLUENZA DUE TO OTHER IDENTIFIED INFLUENZA VIRUS WITH ENCEPHALOPATHY
Respiratory Related	MONDO:0005249	pneumonia	ICD10CM	J10.82	INFLUENZA DUE TO OTHER IDENTIFIED INFLUENZA VIRUS WITH MYOCARDITIS
Respiratory Related	MONDO:0005249	pneumonia	ICD10CM	J10.89	INFLUENZA DUE TO OTHER IDENTIFIED INFLUENZA VIRUS WITH OTHER MANIFESTATIONS
Respiratory Related	MONDO:0005249	pneumonia	ICD10CM	J11.00	INFLUENZA DUE TO UNIDENTIFIED INFLUENZA VIRUS WITH UNSPECIFIED TYPE OF PNEUMONIA
Respiratory Related	MONDO:0005249	pneumonia	ICD10CM	J11.08	INFLUENZA DUE TO UNIDENTIFIED INFLUENZA VIRUS WITH SPECIFIED PNEUMONIA
Respiratory Related	MONDO:0005249	pneumonia	ICD10CM	J12.3	HUMAN METAPNEUMOVIRUS PNEUMONIA
Respiratory Related	MONDO:0005249	pneumonia	ICD10CM	J12.89	OTHER VIRAL PNEUMONIA
Respiratory Related	MONDO:0005249	pneumonia	ICD10CM	J15.4	PNEUMONIA DUE TO OTHER STREPTOCOCCI
Respiratory Related	MONDO:0005249	pneumonia	ICD10CM	J15.8	PNEUMONIA DUE TO OTHER SPECIFIED BACTERIA
Respiratory Related	MONDO:0005249	pneumonia	ICD10CM	J16.8	PNEUMONIA DUE TO OTHER SPECIFIED INFECTIOUS ORGANISMS
Respiratory Related	MONDO:0005249	pneumonia	ICD10CM	J17	PNEUMONIA IN DISEASES CLASSIFIED ELSEWHERE
Respiratory Related	MONDO:0005249	pneumonia	ICD10CM	J18.1	LOBAR PNEUMONIA, UNSPECIFIED ORGANISM
Respiratory Related	MONDO:0005249	pneumonia	ICD10CM	J18.8	OTHER PNEUMONIA, UNSPECIFIED ORGANISM
Respiratory Related	MONDO:0005249	pneumonia	ICD10CM	J18.9	PNEUMONIA, UNSPECIFIED ORGANISM
Respiratory Related	MONDO:0005249	pneumonia	ICD10CM	J69.1	PNEUMONITIS DUE TO INHALATION OF OILS AND ESSENCES
Respiratory Related	MONDO:0005249	pneumonia	ICD10CM	J95.851	VENTILATOR ASSOCIATED PNEUMONIA
Respiratory Related	MONDO:0005249	pneumonia	ICD9CM	482	OTHER BACTERIAL PNEUMONIA
Respiratory Related	MONDO:0005249	pneumonia	ICD9CM	482.8	PNEUMONIA OTH BACTERIAL
Respiratory Related	MONDO:0005249	pneumonia	ICD9CM	483.8	PNEUMONIA DUE TO OTHER SPECIFIED ORGANISM
Respiratory Related	MONDO:0005249	pneumonia	ICD9CM	486	PNEUMONIA, ORGANISM UNSPECIFIED
Respiratory Related	MONDO:0005249	pneumonia	ICD9CM	487	INFLUENZA W
Respiratory Related	MONDO:0005249	pneumonia	ICD9CM	487	INFLUENZA WITH PNEUMONIA
Respiratory Related	MONDO:0005249	pneumonia	ICD9CM	488	FLU D/T AVIAN FLU VIRUS
Respiratory Related	MONDO:0005249	pneumonia	ICD9CM	488.01	INFLUENZA DUE TO IDENTIFIED AVIAN INFLUENZA VIRUS WITH PNEUMONIA
Respiratory Related	MONDO:0005249	pneumonia	ICD9CM	488.02	INFLUENZA DUE TO IDENTIFIED AVIAN INFLUENZA VIRUS WITH OTHER RESPIRATORY MANIFESTATIONS
Respiratory Related	MONDO:0005249	pneumonia	ICD9CM	488.09	INFLUENZA DUE TO IDENTIFIED AVIAN INFLUENZA VIRUS WITH OTHER MANIFESTATIONS
Respiratory Related	MONDO:0005249	pneumonia	ICD9CM	488.1	FLU DT IDEN H1N1 VIRUS
Respiratory Related	MONDO:0005249	pneumonia	ICD9CM	488.12	INFLUENZA DUE TO IDENTIFIED 2009 H1N1 INFLUENZA VIRUS WITH OTHER RESPIRATORY MANIFESTATIONS
Respiratory Related	MONDO:0005249	pneumonia	ICD9CM	488.81	INFLUENZA DUE TO IDENTIFIED NOVEL INFLUENZA A VIRUS WITH PNEUMONIA
Respiratory Related	MONDO:0005249	pneumonia	ICD9CM	488.82	INFLUENZA DUE TO IDENTIFIED NOVEL INFLUENZA A VIRUS WITH OTHER RESPIRATORY MANIFESTATIONS
Respiratory Related	MONDO:0005249	pneumonia	ICD9CM	770	CONGENITAL PNEUMONIA
Respiratory Related	MONDO:0005249	pneumonia	ICD9CM	997.31	VENTILATOR ASSOCIATED PNEUMONIA
Respiratory Related	MONDO:0021113	respiratory failure	ICD10CM	J96.10	CHRONIC RESPIRATORY FAILURE, UNSPECIFIED WHETHER WITH HYPOXIA OR HYPERCAPNIA
Respiratory Related	MONDO:0021113	respiratory failure	ICD10CM	J96.11	CHRONIC RESPIRATORY FAILURE WITH HYPOXIA
Respiratory Related	MONDO:0021113	respiratory failure	ICD10CM	J96.12	CHRONIC RESPIRATORY FAILURE WITH HYPERCAPNIA
Respiratory Related	MONDO:0021113	respiratory failure	ICD10CM	J96.90	RESPIRATORY FAILURE, UNSPECIFIED, UNSPECIFIED WHETHER WITH HYPOXIA OR HYPERCAPNIA
Respiratory Related	MONDO:0021113	respiratory failure	ICD10CM	J96.91	RESPIRATORY FAILURE, UNSPECIFIED WITH HYPOXIA
Respiratory Related	MONDO:0021113	respiratory failure	ICD10CM	J96.92	RESPIRATORY FAILURE, UNSPECIFIED WITH HYPERCAPNIA
Respiratory Related	MONDO:0021113	respiratory failure	ICD9CM	518.83	CHRONIC RESPIRATORY FAILURE
Respiratory Related	MONDO:0001577	respiratory syncytial virus infectious disease	ICD10CM	J12.1	RESPIRATORY SYNCYTIAL VIRUS PNEUMONIA
Respiratory Related	MONDO:0001577	respiratory syncytial virus infectious disease	ICD10CM	J21.0	ACUTE BRONCHIOLITIS DUE TO RESPIRATORY SYNCYTIAL VIRUS
Respiratory Related	MONDO:0001577	respiratory syncytial virus infectious disease	ICD9CM	79.6	RESPIRATORY SYNCYTIAL VIRUS (RSV)
Respiratory Related	MONDO:0001577	respiratory syncytial virus infectious disease	ICD9CM	466.11	ACUTE BRONCHIOLITIS DUE TO RESPIRATORY SYNCYTIAL VIRUS (RSV)
Respiratory Related	MONDO:0001577	respiratory syncytial virus infectious disease	ICD9CM	466.19	ACUTE BRONCHIOLITIS DUE TO OTHER INFECTIOUS ORGANISMS
Respiratory Related	MONDO:0001577	respiratory syncytial virus infectious disease	ICD9CM	480.1	PNEUMONIA DUE TO RESPIRATORY SYNCYTIAL VIRUS
Respiratory Related	MONDO:0004867	upper respiratory tract disease	ICD10CM	J39.2	OTHER DISEASES OF PHARYNX
Respiratory Related	MONDO:0004867	upper respiratory tract disease	ICD10CM	J39.9	DISEASE OF UPPER RESPIRATORY TRACT, UNSPECIFIED
Respiratory Related	MONDO:0004867	upper respiratory tract disease	ICD10CM	R13.12	DYSPHAGIA, OROPHARYNGEAL PHASE
Respiratory Related	MONDO:0004867	upper respiratory tract disease	ICD9CM	787.22	DYSPHAGIA, OROPHARYNGEAL PHASE
Respiratory Related	MONDO:0004867	upper respiratory tract disease	ICD9CM	787.23	DYSPHAGIA, PHARYNGEAL PHASE
Respiratory Related	MONDO:0000270	lower respiratory tract disease	ICD10CM	J22	UNSPECIFIED ACUTE LOWER RESPIRATORY INFECTION
Respiratory Related	MONDO:0000270	lower respiratory tract disease	ICD9CM	478.1	NASAL & SINUS DIS NEC
Respiratory Related	MONDO:0000270	lower respiratory tract disease	ICD9CM	478.19	OTHER DISEASE OF NASAL CAVITY AND SINUSES
